# Supplementary material for: Comparative high-throughput analysis of the Trypanosoma cruzi response to organometallic compounds
Source: Royal Society of Chemistry journal article supplement (doi:10.1039/d0mt00030b), 2020-03-24
Supplement: d0mt00030b3.xlsx [file d0mt00030b3.xlsx]

## Sheet: Pd-dppf-mpo Detected genes
Gene ID	log2 Fold Change	Fold Change	p adj (FDR)	Product Description
TcCLB.507063.60	3.25534	9.54891	8.97934e-63	hypothetical protein, conserved
TcCLB.506009.10	3.08357	8.47712	9.08917e-34	hypothetical protein, conserved
TcCLB.510217.10	2.95308	7.744	3.52639e-19	hypothetical protein
TcCLB.508965.70	2.61143	6.11108	5.68132e-10	hypothetical protein, conserved
TcCLB.509547.10	2.44127	5.43121	1.81138e-10	hypothetical protein
TcCLB.507609.150	2.37678	5.19377	1.93616e-47	hypothetical protein (pseudogene)
TcCLB.508701.20	2.29415	4.90466	4.26813e-195	cation transporter, putative
TcCLB.509755.89	2.2929	4.9004	5.86516e-10	hypothetical protein
TcCLB.510223.9	2.22794	4.68464	1.31773e-15	hypothetical protein, conserved
TcCLB.509105.120	2.18168	4.53682	2.22532e-36	protein kinase, putative
TcCLB.509941.85	2.18005	4.53168	3.50095e-08	trans-sialidase (pseudogene), putative
TcCLB.511283.120	2.13728	4.39933	1.53303e-05	hypothetical protein, conserved
TcCLB.510007.20	2.101	4.29006	4.16993e-27	hypothetical protein, conserved
TcCLB.508873.410	2.09532	4.27322	6.8979e-15	hypothetical protein, conserved
TcCLB.472833.10	2.04447	4.12523	6.72231e-13	hypothetical protein, conserved
TcCLB.511263.40	1.99573	3.98818	3.84596e-06	hypothetical protein, conserved
TcCLB.506193.5	1.99073	3.97437	3.46776e-06	glucose-6-phosphate 1-dehydrogenase (pseudogene), putative
TcCLB.511247.9	1.96997	3.91759	5.8781e-07	hypothetical protein, conserved
TcCLB.506319.40	1.95064	3.86546	6.46969e-16	hypothetical protein
TcCLB.506241.80	1.92947	3.80915	5.43915e-53	hypothetical protein, conserved
TcCLB.510305.70	1.90805	3.75301	8.07798e-21	hypothetical protein, conserved
TcCLB.510581.20	1.8821	3.68612	3.81825e-45	receptor-type adenylate cyclase, putative
TcCLB.511653.20	1.86091	3.63238	2.64332e-15	dual-specificity protein phosphatase, putative
TcCLB.509937.130	1.85604	3.62012	0.000206424	protein kinase, putative
TcCLB.508065.70	1.84986	3.60466	7.0223e-27	protein associated with differentiation 8, putative
TcCLB.511649.100	1.84965	3.60413	6.13367e-22	amino acid permease, putative
TcCLB.510941.3	1.81102	3.50891	6.09947e-41	protein kinase, putative (fragment)
TcCLB.508175.9	1.79598	3.47251	3.28585e-57	hypothetical protein, conserved (fragment)
TcCLB.507515.100	1.79001	3.45817	3.63202e-19	hypothetical protein, conserved
TcCLB.511277.200	1.78041	3.43523	6.33828e-08	RNA-binding protein, putative
TcCLB.506475.90	1.77793	3.42934	2.33227e-15	hypothetical protein, conserved
TcCLB.505193.60	1.77035	3.41136	2.51074e-10	hypothetical protein, conserved
TcCLB.508231.190	1.74801	3.35894	1.10654e-25	ATP-binding cassette protein subfamily G
TcCLB.504173.40	1.7461	3.3545	7.71158e-08	hypothetical protein
TcCLB.511261.120	1.74369	3.34891	9.64485e-23	pumilio/PUF RNA binding protein 2, putative
TcCLB.510977.20	1.74336	3.34814	4.04016e-16	hypothetical protein, conserved (pseudogene)
TcCLB.506247.190	1.71531	3.28367	4.9047e-05	nuclear lim interactor-interacting factor, putative
TcCLB.511481.70	1.71423	3.28121	0.000146383	RNA-binding protein 5, putative
TcCLB.506479.120	1.70909	3.26956	3.74752e-24	cytidine triphosphate synthase, putative
TcCLB.511857.10	1.70891	3.26913	5.66772e-56	hypothetical protein, conserved
TcCLB.509163.50	1.69369	3.23483	3.10421e-07	hypothetical protein
TcCLB.511857.50	1.65977	3.15967	3.70563e-35	actin-like protein, putative
TcCLB.506297.350	1.6588	3.15753	2.82457e-12	SKP1-like protein
TcCLB.507019.130	1.65859	3.15707	3.49956e-14	hypothetical protein
TcCLB.504269.10	1.65768	3.15508	1.02962e-31	protein kinase (pseudogene), putative
TcCLB.508815.10	1.657	3.15359	1.71742e-12	hypothetical protein, conserved
TcCLB.506577.5	1.6549	3.14901	3.27986e-19	hypothetical protein
TcCLB.510045.20	1.65407	3.1472	1.70134e-10	ABC transporter, putative
TcCLB.506435.50	1.64273	3.12256	1.68234e-27	hypothetical protein, conserved
TcCLB.504105.100	1.63996	3.11658	1.12267e-40	hypothetical protein
TcCLB.509573.10	1.63481	3.10547	1.06061e-27	small GTP-binding protein Rab7, putative
TcCLB.511755.80	1.63337	3.10237	6.84721e-09	formin, putative
TcCLB.503583.100	1.63258	3.10068	8.20421e-11	hypothetical protein, conserved
TcCLB.511277.140	1.62045	3.07472	2.46895e-26	serine/threonine protein kinase, putative
TcCLB.506559.190	1.61876	3.0711	1.46094e-27	kinatase, putative
TcCLB.503781.30	1.59859	3.02847	8.20989e-24	hypothetical protein, conserved
TcCLB.503733.30	1.59856	3.0284	5.08796e-38	hypothetical protein, conserved
TcCLB.511459.20	1.59788	3.02699	9.91083e-30	hypothetical protein, conserved
TcCLB.508669.10	1.59674	3.02459	2.70393e-46	hypothetical protein, conserved
TcCLB.510581.9	1.59009	3.01068	1.81683e-45	receptor-type adenylate cyclase, putative (fragment)
TcCLB.506479.10	1.57916	2.98795	1.04768e-14	hypothetical protein, conserved
TcCLB.511825.240	1.5634	2.95549	1.73753e-33	hypothetical protein, conserved
TcCLB.506537.240	1.55752	2.94347	4.24398e-43	hypothetical protein, conserved
TcCLB.508409.310	1.55685	2.94212	2.14658e-16	hypothetical protein, conserved
TcCLB.508857.30	1.55566	2.93969	5.93407e-38	trans-sialidase, Group I, putative
TcCLB.509229.20	1.54075	2.90946	5.72773e-39	hypothetical protein, conserved
TcCLB.510801.10	1.53875	2.90543	5.31598e-13	calpain-like cysteine peptidase, putative (fragment)
TcCLB.508889.19	1.53511	2.89811	5.59457e-10	hypothetical protein
TcCLB.511887.50	1.52785	2.88356	1.75767e-14	hypothetical protein, conserved
TcCLB.508859.118	1.5256	2.87907	3.20471e-19	trans-sialidase, putative
TcCLB.511671.130	1.50925	2.84662	2.26577e-23	hypothetical protein, conserved
TcCLB.504021.20	1.50403	2.83633	5.96579e-15	hypothetical protein, conserved
TcCLB.504161.30	1.5035	2.8353	2.11773e-15	hypothetical protein, conserved
TcCLB.509593.50	1.50163	2.83163	1.32046e-10	retrotransposon hot spot protein (RHS, pseudogene), putative
TcCLB.511165.100	1.49793	2.82437	1.44297e-10	serine/threonine protein kinase, putative
TcCLB.510219.10	1.48932	2.80756	3.33132e-21	hypothetical protein, conserved
TcCLB.509985.10	1.48802	2.80503	1.6015e-19	hypothetical protein, conserved (pseudogene)
TcCLB.507895.31	1.48692	2.8029	4.51233e-10	retrotransposon hot spot protein (RHS, pseudogene), putative
TcCLB.511291.50	1.48131	2.79202	3.6273e-23	hypothetical protein, conserved
TcCLB.510007.50	1.47696	2.78361	6.14374e-08	hypothetical protein, conserved
TcCLB.503987.70	1.47389	2.77769	5.3929e-18	ribosome biogenesis protein TSR3, putative
TcCLB.510817.30	1.47292	2.77584	7.89821e-19	hypothetical protein, conserved (pseudogene)
TcCLB.506793.50	1.46219	2.75527	5.4389e-25	hypothetical protein, conserved
TcCLB.510977.9	1.45543	2.74239	1.95358e-31	hypothetical protein, conserved (fragment)
TcCLB.507491.70	1.45316	2.73807	9.45191e-06	hypothetical protein, conserved (pseudogene)
TcCLB.509637.27	1.45304	2.73784	4.26644e-18	hypothetical protein, conserved
TcCLB.507087.14	1.44967	2.73145	3.37972e-14	hypothetical protein, conserved
TcCLB.503411.4	1.44256	2.71802	0.000138011	hypothetical protein, conserved
TcCLB.511635.80	1.43859	2.71056	1.93786e-09	hypothetical protein, conserved
TcCLB.506791.10	1.43731	2.70815	2.23442e-30	CYC2-like cyclin 4, putative
TcCLB.507087.30	1.43381	2.70159	1.15608e-19	Peptidase C19, ubiquitin carboxyl-terminal hydrolase, putative
TcCLB.511151.54	1.43379	2.70156	1.56062e-34	surface protease GP63, putative
TcCLB.506275.121	1.43239	2.69894	1.12046e-06	hypothetical protein
TcCLB.507317.60	1.42958	2.69369	0.000974279	protein kinase-like protein, putative
TcCLB.506977.10	1.42511	2.68535	2.55436e-07	dual specificity protein phosphatase, putative
TcCLB.508817.110	1.42176	2.67912	1.2229e-20	hypothetical protein, conserved
TcCLB.504023.10	1.42092	2.67757	1.60238e-09	hypothetical protein, conserved
TcCLB.510889.290	1.41432	2.66533	9.08112e-11	hypothetical protein
TcCLB.509161.10	1.40845	2.65452	2.18952e-27	ubiquitin-conjugating enzyme E2, putative
TcCLB.503939.60	1.40583	2.64969	6.79465e-24	hypothetical protein, conserved
TcCLB.510887.30	1.40518	2.6485	9.02434e-17	hypothetical protein, conserved
TcCLB.511299.10	1.3924	2.62515	1.57041e-07	Triglyceride lipase, putative (fragment)
TcCLB.503923.40	1.39036	2.62145	7.24533e-05	hypothetical protein, conserved
TcCLB.508645.40	1.38883	2.61866	4.83154e-72	nucleoside transporter 1, putative
TcCLB.507705.10	1.38753	2.6163	0.00031709	hypothetical protein, conserved
TcCLB.503559.70	1.38468	2.61113	8.25608e-28	cystinosin, putative
TcCLB.511159.14	1.38389	2.60972	1.12273e-23	hypothetical protein, conserved
TcCLB.510575.239	1.38385	2.60964	0.00204407	hypothetical protein, conserved
TcCLB.509799.120	1.38104	2.60456	8.32736e-10	hypothetical protein, conserved
TcCLB.511905.9	1.37731	2.59784	0.0054882	hypothetical protein, conserved
TcCLB.507949.250	1.37706	2.59739	1.31187e-80	hypothetical protein, conserved
TcCLB.504069.34	1.37609	2.59564	8.55646e-12	hypothetical protein, conserved
TcCLB.504173.60	1.37531	2.59424	4.34645e-22	hypothetical protein, conserved
TcCLB.507793.60	1.37429	2.59239	1.88128e-06	hypothetical protein, conserved
TcCLB.508909.150	1.37392	2.59175	8.95981e-11	hypothetical protein, conserved
TcCLB.504021.10	1.36698	2.57931	2.57127e-26	G1 cyclin CycE4, putative
TcCLB.511759.40	1.36232	2.57098	3.34935e-11	hypothetical protein, conserved
TcCLB.506679.10	1.36008	2.56699	1.87451e-09	hypothetical protein, conserved
TcCLB.508257.210	1.35631	2.56029	3.15206e-24	hypothetical protein, conserved
TcCLB.507781.10	1.35353	2.55536	1.46671e-08	hypothetical protein, conserved (pseudogene)
TcCLB.507063.10	1.35018	2.54944	3.04709e-11	hypothetical protein
TcCLB.506883.90	1.34868	2.54679	2.14866e-23	hypothetical protein, conserved
TcCLB.511291.40	1.34859	2.54662	1.00171e-27	protein kinase, putative
TcCLB.510661.190	1.34727	2.5443	1.91195e-08	protein kinase, putative
TcCLB.511249.110	1.34591	2.54191	5.09083e-39	kinesin K39 (pseudogene), putative
TcCLB.507073.20	1.34526	2.54076	1.55203e-26	hypothetical protein, conserved
TcCLB.508659.30	1.34461	2.53961	1.76431e-10	hypothetical protein, conserved
TcCLB.508441.30	1.34284	2.53651	3.16559e-05	protein kinase, putative
TcCLB.510575.210	1.34167	2.53445	3.83193e-20	hypothetical protein, conserved
TcCLB.509681.10	1.34125	2.5337	0.00414617	hypothetical protein, conserved
TcCLB.511755.100	1.34054	2.53246	1.82199e-05	hypothetical protein, conserved
TcCLB.508909.330	1.34011	2.5317	2.50354e-26	protein kinase, putative
TcCLB.509991.80	1.33903	2.52981	3.36288e-13	hypothetical protein, conserved
TcCLB.507087.10	1.3377	2.52749	2.32649e-05	hydrolase-like protein (pseudogene), putative
TcCLB.506619.30	1.33739	2.52693	3.56034e-05	Flagellar Member 8
TcCLB.503679.30	1.33489	2.52257	3.24243e-21	hypothetical protein, conserved
TcCLB.509721.20	1.33322	2.51964	7.9016e-19	hypothetical protein, conserved
TcCLB.458241.10	1.33116	2.51605	6.52614e-05	hypothetical protein, conserved
TcCLB.508153.740	1.33073	2.51531	2.28945e-26	hypothetical protein
TcCLB.511909.50	1.32916	2.51256	1.05597e-15	hypothetical protein, conserved
TcCLB.510221.20	1.3274	2.5095	3.49349e-12	hypothetical protein, conserved
TcCLB.507519.180	1.32377	2.5032	1.46651e-33	hypothetical protein, conserved
TcCLB.506425.80	1.32374	2.50314	3.84808e-14	phosphatidylinositol kinase, putative
TcCLB.511465.20	1.32354	2.50279	2.48421e-36	hypothetical protein, conserved
TcCLB.506871.120	1.32312	2.50206	1.97024e-30	hypothetical protein, conserved
TcCLB.510835.10	1.32268	2.5013	2.63683e-05	hypothetical protein, conserved
TcCLB.507007.77	1.31935	2.49553	0.0106762	hypothetical protein, conserved
TcCLB.503415.10	1.31927	2.4954	1.93492e-08	hypothetical protein (pseudogene)
TcCLB.506721.30	1.31927	2.4954	1.1565e-23	calpain-like cysteine peptidase, putative
TcCLB.509751.4	1.317	2.49148	0.000274984	hypothetical protein, conserved (fragment)
TcCLB.511269.50	1.31678	2.49109	2.04425e-05	protein kinase A catalytic subunit 3
TcCLB.511277.554	1.31603	2.4898	6.71471e-31	hypothetical protein, conserved
TcCLB.508365.80	1.31422	2.48668	1.47075e-05	hypothetical protein
TcCLB.511257.30	1.31229	2.48335	3.18543e-13	ras-related protein rab, putative
TcCLB.507501.25	1.30963	2.47878	0.00260689	hypothetical protein, conserved (pseudogene)
TcCLB.503939.50	1.30837	2.47662	6.26599e-15	hypothetical protein, conserved
TcCLB.507031.179	1.30616	2.47283	1.42105e-06	hypothetical protein, conserved
TcCLB.509525.40	1.30615	2.47282	0.00290542	hypothetical protein, conserved
TcCLB.508141.70	1.3057	2.47204	2.30767e-05	Kinesin-13 4, putative
TcCLB.509717.60	1.30088	2.46379	3.22988e-25	metallo-peptidase, Clan MA(E) Family M41
TcCLB.503723.20	1.30021	2.46264	1.17702e-14	hypothetical protein, conserved
TcCLB.511283.130	1.29915	2.46083	1.4378e-13	MEKK-related kinase 1, putative
TcCLB.503809.158	1.2976	2.4582	1.13188e-07	Triglyceride lipase, putative (fragment)
TcCLB.509791.100	1.29623	2.45586	3.00291e-22	hypothetical protein, conserved
TcCLB.509243.20	1.29547	2.45457	0.00219363	hypothetical protein, conserved
TcCLB.511461.30	1.29394	2.45197	2.32808e-10	hypothetical protein, conserved
TcCLB.506855.300	1.29234	2.44925	1.02665e-07	hypothetical protein, conserved
TcCLB.510577.30	1.29124	2.44738	2.11334e-19	hypothetical protein
TcCLB.503693.11	1.29118	2.44729	0.00956687	hypothetical protein, conserved (fragment)
TcCLB.503431.90	1.29064	2.44636	9.52637e-18	hypothetical protein, conserved
TcCLB.506475.110	1.29028	2.44576	1.89621e-14	hypothetical protein
TcCLB.507857.4	1.28742	2.44092	2.3816e-11	transcription elongation factor, putative
TcCLB.509237.90	1.2843	2.43563	7.85112e-28	hypothetical protein, conserved
TcCLB.507823.39	1.28232	2.4323	2.28555e-15	hypothetical protein, conserved
TcCLB.508693.190	1.28129	2.43057	2.73729e-08	hypothetical protein, conserved
TcCLB.510425.28	1.27881	2.42639	0.00648389	hypothetical protein, conserved
TcCLB.509287.80	1.2782	2.42537	3.32135e-30	trans-sialidase, Group VII, putative
TcCLB.508817.170	1.27778	2.42466	1.00915e-15	hypothetical protein, conserved
TcCLB.508351.30	1.276	2.42167	7.78159e-20	hypothetical protein, conserved
TcCLB.511649.30	1.27114	2.41352	1.36019e-11	hypothetical protein, conserved
TcCLB.509207.80	1.26807	2.40839	3.57467e-09	glycogen synthase kinase-3 alpha, putative
TcCLB.503635.89	1.26701	2.40662	8.53608e-11	hypothetical protein, conserved
TcCLB.508919.110	1.26603	2.40499	0.00650689	hypothetical protein, conserved
TcCLB.503415.30	1.26496	2.40321	0.000303465	hypothetical protein, conserved
TcCLB.509799.20	1.26298	2.39992	1.96767e-12	hypothetical protein, conserved
TcCLB.506151.10	1.2617	2.39778	4.26486e-18	hypothetical protein, conserved
TcCLB.511295.20	1.26164	2.39768	0.000279108	hypothetical protein, conserved
TcCLB.507517.20	1.25856	2.39256	1.38399e-21	DNA polymerase sigma-like protein, putative
TcCLB.508641.100	1.25848	2.39243	2.78788e-22	hypothetical protein, conserved
TcCLB.506009.20	1.25712	2.39018	3.02483e-29	hypothetical protein, conserved
TcCLB.503415.40	1.25712	2.39017	0.000847177	hypothetical protein
TcCLB.506319.70	1.2564	2.38898	0.00716028	hypothetical protein
TcCLB.507723.120	1.25619	2.38864	0.000337342	U1A small nuclear ribonucleoprotein, putative
TcCLB.451263.9	1.25616	2.38859	0.00624155	hypothetical protein, conserved
TcCLB.510689.80	1.25553	2.38755	8.77653e-10	hypothetical protein, conserved
TcCLB.507063.70	1.25549	2.38748	4.08753e-24	trans-sialidase, Group II, putative
TcCLB.508001.90	1.24906	2.37687	7.02202e-10	hypothetical protein, conserved (pseudogene)
TcCLB.504123.20	1.2478	2.37478	1.28144e-13	hypothetical protein, conserved
TcCLB.503635.10	1.2427	2.36641	1.53364e-12	protein kinase, putative
TcCLB.508851.160	1.23724	2.35747	2.35461e-24	hypothetical protein, conserved
TcCLB.510333.10	1.23656	2.35637	1.65954e-23	hypothetical protein, conserved
TcCLB.509001.30	1.23599	2.35543	1.8812e-29	hypothetical protein, conserved
TcCLB.506491.10	1.22941	2.34471	0.0125039	casein kinase I, putative
TcCLB.508901.20	1.22731	2.34129	0.0190072	RNA-binding protein 4, putative
TcCLB.506583.50	1.22646	2.33992	0.00132102	hypothetical protein, conserved
TcCLB.503693.29	1.22616	2.33943	8.09281e-27	hypothetical protein
TcCLB.509017.50	1.22388	2.33574	6.17421e-27	hypothetical protein, conserved
TcCLB.508999.260	1.22239	2.33332	4.75186e-43	calpain-like cysteine peptidase (pseudogene), putative
TcCLB.509637.18	1.22206	2.33279	2.45939e-09	hypothetical protein, conserved
TcCLB.511907.30	1.22188	2.33251	4.62475e-31	cytoskeleton associated protein, putative
TcCLB.511483.10	1.21691	2.32448	1.59685e-17	hypothetical protein
TcCLB.503411.10	1.214	2.31979	4.01942e-37	hypothetical protein
TcCLB.511667.10	1.21376	2.31942	0.000203271	hypothetical protein, conserved
TcCLB.511283.240	1.21086	2.31475	1.01844e-32	hypothetical protein, conserved
TcCLB.506475.100	1.20751	2.30939	0.0017675	conserved protein, unknown function
TcCLB.511661.20	1.20677	2.30821	5.14757e-19	hypothetical protein, conserved
TcCLB.506999.180	1.20586	2.30674	3.29576e-18	hypothetical protein
TcCLB.508909.160	1.20367	2.30325	2.11568e-08	hypothetical protein, conserved
TcCLB.507063.170	1.20032	2.29791	0.00044728	hypothetical protein
TcCLB.511909.60	1.20032	2.2979	2.68595e-09	hypothetical protein, conserved
TcCLB.508153.160	1.19947	2.29655	1.58367e-06	hypothetical protein, conserved
TcCLB.509569.40	1.19914	2.29602	6.5083e-32	hypothetical protein, conserved
TcCLB.507063.290	1.19896	2.29575	4.23e-21	hypothetical protein
TcCLB.510363.90	1.1971	2.29278	0.00131056	hypothetical protein
TcCLB.511491.40	1.19645	2.29174	1.2485e-32	hypothetical protein, conserved
TcCLB.507787.40	1.19445	2.28857	7.7803e-20	hypothetical protein, conserved
TcCLB.508445.90	1.19166	2.28416	8.15131e-14	hypothetical protein, conserved
TcCLB.508919.94	1.18826	2.27877	1.41886e-14	hypothetical protein, conserved
TcCLB.506443.20	1.18619	2.27551	2.37208e-15	hypothetical protein, conserved
TcCLB.504085.70	1.1836	2.27142	0.0154542	Zinc finger protein, C3H1 type-like
TcCLB.507645.30	1.18302	2.27052	1.55405e-10	hypothetical protein, conserved
TcCLB.506315.40	1.18081	2.26704	1.30508e-10	hypothetical protein, conserved
TcCLB.508865.4	1.18073	2.26692	3.98929e-08	protein phosphatase 2C, putative
TcCLB.511261.80	1.18016	2.26603	3.29978e-12	hypothetical protein, conserved
TcCLB.509509.30	1.17589	2.25932	1.35875e-19	6-phosphofructo-2-kinase/fructose-2,6-biphosphatase, putative
TcCLB.506587.44	1.17545	2.25863	6.82453e-08	hypothetical protein
TcCLB.508637.160	1.17513	2.25812	9.19231e-06	dual specificity protein phosphatase, putative
TcCLB.510657.20	1.17486	2.2577	0.000305673	ubiquitin hydrolase, putative
TcCLB.511887.45	1.17412	2.25656	0.00019858	hypothetical protein, conserved (pseudogene)
TcCLB.511629.20	1.17055	2.25098	7.77016e-14	hypothetical protein, conserved
TcCLB.511295.60	1.16993	2.25	5.91449e-25	hypothetical protein, conserved (pseudogene)
TcCLB.503917.7	1.16965	2.24957	1.07706e-23	RNA-binding protein, putative
TcCLB.508637.40	1.16909	2.24869	1.09477e-26	hypothetical protein, conserved
TcCLB.511857.20	1.16818	2.24728	3.57504e-19	hypothetical protein, conserved
TcCLB.506679.80	1.16792	2.24687	5.04528e-12	SNF1-related protein kinases, putative
TcCLB.511517.160	1.16643	2.24455	1.25691e-12	hypothetical protein, conserved
TcCLB.504223.10	1.16641	2.24453	2.12258e-26	amino acid permease, putative
TcCLB.436761.20	1.1659	2.24373	0.00302817	hypothetical protein, conserved (fragment)
TcCLB.504839.60	1.16583	2.24363	1.26578e-25	hypothetical protein, conserved
TcCLB.511821.80	1.16348	2.23997	2.36495e-14	hypothetical protein, conserved
TcCLB.506975.49	1.16343	2.23989	3.3588e-08	f-actin capping protein beta subunit, putative
TcCLB.508153.680	1.16266	2.2387	0.00390226	RNA-binding protein 6, putative
TcCLB.511629.10	1.16254	2.23851	8.12943e-08	hypothetical protein, conserved
TcCLB.511517.30	1.16212	2.23786	1.65954e-23	hypothetical protein, conserved
TcCLB.508645.20	1.16105	2.2362	1.24871e-17	hypothetical protein
TcCLB.509999.140	1.15582	2.22812	0.0143266	Double RNA binding domain protein 6A
TcCLB.510359.190	1.15512	2.22704	1.11404e-14	hypothetical protein, conserved
TcCLB.508819.30	1.15489	2.22667	3.7529e-15	hypothetical protein, conserved
TcCLB.503413.19	1.15435	2.22584	3.74027e-05	hypothetical protein
TcCLB.506247.420	1.15416	2.22554	1.0211e-05	hypothetical protein, conserved
TcCLB.511295.10	1.15324	2.22413	5.11162e-10	FKBP-type peptidylprolyl cis-trans isomerase, putative
TcCLB.508461.280	1.14819	2.21636	6.33075e-15	protein kinase A catalytic subunit isoform 2, putative
TcCLB.505183.160	1.1474	2.21514	3.67584e-09	hypothetical protein, conserved
TcCLB.506871.190	1.14515	2.21169	1.88285e-05	hypothetical protein
TcCLB.511817.210	1.14346	2.20911	8.03451e-19	protein kinase, putative
TcCLB.506681.40	1.14298	2.20836	0.00667643	hypothetical protein, conserved
TcCLB.508797.10	1.14278	2.20806	8.32264e-11	tubulin-tyrosine ligase-like protein, putative
TcCLB.508153.1000	1.1417	2.20641	5.44262e-17	hypothetical protein, conserved
TcCLB.508741.110	1.14053	2.20461	0.00450109	hypothetical protein, conserved
TcCLB.509561.50	1.13904	2.20234	2.3429e-13	hypothetical protein, conserved
TcCLB.508153.970	1.1384	2.20137	2.74417e-07	AGC/RSK family serine/threonine kinase, putative
TcCLB.507623.20	1.13732	2.19973	7.21119e-15	hypothetical protein, conserved
TcCLB.510303.200	1.13687	2.19904	2.10302e-25	glucosamine-fructose-6-phosphate aminotransferase, putative
TcCLB.511661.70	1.1366	2.19862	1.48538e-12	hypothetical protein, conserved
TcCLB.511903.90	1.1352	2.19648	2.99148e-10	hypothetical protein, conserved
TcCLB.510421.180	1.13189	2.19146	2.33561e-19	casein kinase I, putative
TcCLB.507775.10	1.13181	2.19133	1.43327e-12	hypothetical protein, conserved
TcCLB.506793.90	1.13	2.18858	0.0030512	hypothetical protein, conserved
TcCLB.510363.130	1.12982	2.18831	0.0116334	hypothetical protein
TcCLB.507889.20	1.12878	2.18674	1.82457e-09	hypothetical protein, conserved
TcCLB.506977.110	1.12814	2.18577	6.91941e-10	hypothetical protein, conserved (pseudogene)
TcCLB.509029.40	1.12736	2.18459	7.79752e-22	hypothetical protein, conserved
TcCLB.504251.20	1.12501	2.18103	5.54484e-08	hypothetical protein, conserved
TcCLB.510577.10	1.12476	2.18065	0.00462282	hypothetical protein, conserved
TcCLB.508301.10	1.12225	2.17685	3.97274e-17	hypothetical protein, conserved
TcCLB.510329.380	1.12161	2.17589	8.03133e-15	hypothetical protein, conserved
TcCLB.511511.3	1.11886	2.17176	0.0131912	zinc finger protein ZFP1
TcCLB.507031.110	1.11805	2.17053	8.01963e-14	hypothetical protein, conserved
TcCLB.507491.119	1.11764	2.16991	3.33318e-14	hypothetical protein, conserved
TcCLB.511385.110	1.11483	2.16569	6.91536e-12	hypothetical protein
TcCLB.508457.10	1.1128	2.16265	0.010749	Kinesin-13 6, putative
TcCLB.508859.90	1.11165	2.16093	5.08243e-09	phosphatidylinositol 3-kinase 2, putative
TcCLB.503703.100	1.11105	2.16003	9.74446e-18	hypothetical protein, conserved
TcCLB.508645.70	1.11086	2.15974	2.33186e-10	nucleoside transporter 1, putative
TcCLB.504827.130	1.10981	2.15818	2.23904e-10	eukaryotic translation initiation factor 4 gamma 4
TcCLB.503583.80	1.109	2.15695	3.87331e-14	dual specificity protein phosphatase or MAP kinase phosphatase, putative
TcCLB.511267.20	1.10872	2.15654	2.99835e-05	hypothetical protein, conserved
TcCLB.508737.80	1.1062	2.15279	1.08239e-19	mannosyltransferase-like protein, putative
TcCLB.508897.119	1.10392	2.14939	2.19457e-21	FKBP-type peptidylprolyl cis-trans isomerase, putative
TcCLB.511233.90	1.10101	2.14505	3.67736e-08	hypothetical protein, conserved
TcCLB.503679.20	1.09968	2.14307	1.60514e-15	hypothetical protein, conserved
TcCLB.503499.30	1.09832	2.14106	6.52642e-08	mitochondrial carrier protein (pseudogene), putative
TcCLB.508945.10	1.0966	2.1385	7.8969e-20	hypothetical protein, conserved
TcCLB.506559.434	1.0952	2.13643	6.93368e-11	hypothetical protein, conserved
TcCLB.510889.251	1.0952	2.13642	7.33934e-11	Present in the outer mitochondrial membrane proteome 18
TcCLB.509527.135	1.095	2.13613	0.0132758	hypothetical protein
TcCLB.506559.500	1.08927	2.12767	0.00905398	hypothetical protein, conserved
TcCLB.510329.320	1.08898	2.12723	2.46386e-12	hypothetical protein, conserved
TcCLB.504253.20	1.08807	2.12589	5.42321e-19	hypothetical protein, conserved
TcCLB.425855.9	1.08791	2.12566	1.19622e-08	hypothetical protein, conserved (fragment)
TcCLB.510889.280	1.08647	2.12354	0.0171749	metacyclin II, putative
TcCLB.511649.60	1.08548	2.12209	1.06074e-06	COP9 signalosome complex subunit 5, putative
TcCLB.507501.30	1.08409	2.12003	9.38836e-05	hypothetical protein, conserved
TcCLB.508257.30	1.08364	2.11938	4.64974e-15	hypothetical protein, conserved
TcCLB.503703.10	1.08306	2.11853	8.29531e-11	hypothetical protein, conserved
TcCLB.503999.100	1.08142	2.11612	0.000127809	phospholipid-transporting ATPase 1-like protein, putative
TcCLB.511299.60	1.0812	2.11579	1.0294e-05	hypothetical protein, conserved
TcCLB.511367.180	1.08116	2.11573	1.58668e-26	hypothetical protein
TcCLB.504021.74	1.08091	2.11536	1.65979e-10	hypothetical protein, conserved
TcCLB.507951.250	1.08062	2.11494	4.10848e-08	tRNA isopentenyltransferase, putative
TcCLB.511773.35	1.07961	2.11346	0.0164108	hypothetical protein, conserved (pseudogene)
TcCLB.511249.100	1.07935	2.11308	5.13857e-21	hypothetical protein, conserved
TcCLB.509647.110	1.07854	2.1119	1.28911e-16	hypothetical protein, conserved
TcCLB.508409.160	1.07823	2.11145	7.61256e-17	thymine-7-hydroxylase, putative
TcCLB.507159.41	1.07597	2.10813	1.41872e-05	hypothetical protein, conserved
TcCLB.509259.129	1.07385	2.10504	0.00468599	hypothetical protein, conserved (pseudogene)
TcCLB.508691.10	1.07265	2.10329	0.0297652	hypothetical protein, conserved
TcCLB.509025.20	1.07211	2.10251	0.000323202	hypothetical protein, conserved
TcCLB.506819.49	1.07104	2.10094	5.98881e-10	hypothetical protein, conserved
TcCLB.507947.10	1.06946	2.09865	0.000955316	conserved protein, unknown function
TcCLB.509161.130	1.06911	2.09815	1.52093e-13	ATP- dependent RNA helicase, putative
TcCLB.509331.90	1.06873	2.09759	1.14342e-21	5'-AMP-activated protein kinase subunit beta, putative
TcCLB.511821.170	1.06871	2.09756	5.55836e-09	hypothetical protein, conserved
TcCLB.506585.100	1.0681	2.09666	1.16937e-12	hypothetical protein
TcCLB.510359.290	1.06402	2.09075	4.18436e-12	hypothetical protein, conserved
TcCLB.508873.20	1.06341	2.08986	0.00452276	hypothetical protein
TcCLB.510661.240	1.06116	2.0866	1.01842e-21	hypothetical protein, conserved
TcCLB.510729.140	1.05907	2.08358	1.64132e-07	NIMA-related kinase, putative
TcCLB.504069.110	1.05881	2.08322	7.59355e-06	hypothetical protein, conserved
TcCLB.510433.10	1.05756	2.08141	0.0376905	hypothetical protein
TcCLB.511719.41	1.05736	2.08112	1.89748e-07	hypothetical protein, conserved (fragment)
TcCLB.510889.210	1.05729	2.08102	3.03577e-06	hypothetical protein, conserved
TcCLB.509023.160	1.05671	2.08018	3.62228e-12	hypothetical protein, conserved
TcCLB.508263.30	1.05651	2.0799	3.89625e-16	kinesin, putative
TcCLB.507049.66	1.05504	2.07777	1.29775e-07	hypothetical protein
TcCLB.509607.70	1.05262	2.07429	0.0388251	serine/threonine protein kinase, putative
TcCLB.506915.10	1.05207	2.0735	1.29527e-19	hypothetical protein, conserved
TcCLB.509733.190	1.05109	2.0721	0.000419652	hypothetical protein, conserved
TcCLB.508891.80	1.04949	2.0698	1.97538e-08	hypothetical protein, conserved (pseudogene)
TcCLB.511209.30	1.04868	2.06864	1.18307e-14	hypothetical protein, conserved (pseudogene)
TcCLB.509647.80	1.04835	2.06817	1.62532e-13	hypothetical protein, conserved
TcCLB.507515.90	1.04833	2.06813	3.32147e-17	hypothetical protein, conserved
TcCLB.509715.130	1.04831	2.06811	4.6948e-11	hypothetical protein, conserved
TcCLB.508663.10	1.0481	2.0678	0.00774792	mucin TcMUC (pseudogene), putative
TcCLB.510735.40	1.04782	2.0674	3.60322e-14	hypothetical protein, conserved
TcCLB.511245.240	1.04754	2.067	2.1574e-14	serine/threonine protein kinase, putative
TcCLB.410199.4	1.04602	2.06482	0.00044421	kinase, putative (fragment)
TcCLB.511017.25	1.0434	2.06108	0.000368421	hypothetical protein
TcCLB.506201.80	1.04296	2.06046	6.55863e-25	serine/threonine-protein phosphatase PP1, putative
TcCLB.511823.14	1.04219	2.05935	0.000350559	hypothetical protein, conserved
TcCLB.429229.10	1.03852	2.05411	0.0106746	hypothetical protein, conserved
TcCLB.503703.30	1.03842	2.05398	5.18503e-16	hypothetical protein, conserved
TcCLB.510827.10	1.03785	2.05317	3.04806e-19	hypothetical protein, conserved
TcCLB.508819.40	1.03644	2.05115	0.0483782	hypothetical protein, conserved
TcCLB.503973.110	1.03517	2.04936	0.00664355	hypothetical protein
TcCLB.506477.60	1.0336	2.04713	2.15141e-08	protein kinase, putative
TcCLB.508461.310	1.0335	2.04698	3.66289e-12	protein kinase A catalytic subunit isoform 1, putative
TcCLB.504123.40	1.0326	2.0457	4.5156e-08	hypothetical protein, conserved
TcCLB.508319.10	1.03252	2.04559	NA	hypothetical protein
TcCLB.503919.20	1.03232	2.04531	3.31941e-05	hypothetical protein, conserved
TcCLB.510219.20	1.03042	2.04262	2.36e-10	hypothetical protein, conserved
TcCLB.509571.60	1.02731	2.03822	6.33377e-08	hypothetical protein, conserved
TcCLB.468005.9	1.02677	2.03745	1.95344e-14	pumilio/PUF RNA binding protein 3, putative
TcCLB.508879.160	1.02634	2.03685	2.97626e-16	hypothetical protein, conserved
TcCLB.509695.50	1.02632	2.03682	2.26884e-13	katanin, putative
TcCLB.511163.50	1.02614	2.03657	4.37342e-10	hypothetical protein, conserved
TcCLB.507073.49	1.02453	2.0343	4.62501e-09	hypothetical protein, conserved
TcCLB.504253.40	1.02427	2.03393	1.4432e-11	hypothetical protein, conserved
TcCLB.508261.140	1.02421	2.03385	0.0530083	elongation factor 1-gamma (EF-1-gamma), putative
TcCLB.509725.30	1.02403	2.03359	0.000734869	hypothetical protein, conserved (pseudogene)
TcCLB.510735.90	1.02393	2.03344	2.73034e-18	Flagellum attachment zone protein 4
TcCLB.509215.19	1.02309	2.03226	1.37258e-06	hypothetical protein, conserved
TcCLB.510335.10	1.02064	2.02881	4.27133e-15	hypothetical protein, conserved
TcCLB.506537.120	1.02061	2.02878	0.00624155	hypothetical protein, conserved
TcCLB.510155.160	1.02025	2.02827	6.81263e-27	protein kinase, putative
TcCLB.511821.179	1.01963	2.0274	3.44162e-05	hypothetical protein, conserved
TcCLB.506721.50	1.01896	2.02645	0.000489779	hypothetical protein
TcCLB.511511.6	1.01867	2.02605	0.000539772	zinc finger protein ZFP1
TcCLB.506855.130	1.01856	2.0259	1.25552e-10	hypothetical protein, conserved
TcCLB.511649.169	1.01854	2.02587	1.43321e-09	ATP-dependent DEAD/H RNA helicase, putative
TcCLB.509429.260	1.01815	2.02532	2.46678e-11	hypothetical protein, conserved
TcCLB.508867.9	1.01476	2.02057	0.00150243	kinesin, putative (fragment)
TcCLB.508741.280	1.01386	2.01931	3.75211e-17	ubiquitin-conjugating enzyme E2, putative
TcCLB.506445.20	1.01376	2.01916	5.69676e-15	Eukaryotic translation initiation factor 4 gamma 2
TcCLB.505193.40	1.01351	2.01882	1.8686e-11	SUMO1/Ulp2, putative
TcCLB.511235.20	1.0122	2.01699	0.0537368	glyceraldehyde 3-phosphate dehydrogenase, cytosolic, putative
TcCLB.510007.30	1.01084	2.01509	0.00876639	RNA-binding protein, putative
TcCLB.511859.80	1.01027	2.01429	8.21842e-26	hypothetical protein
TcCLB.507681.40	1.01008	2.01403	2.70537e-17	hypothetical protein
TcCLB.511245.170	1.00961	2.01337	1.66896e-21	hypothetical protein, conserved
TcCLB.510245.10	1.00873	2.01214	4.41253e-28	amino acid permease, putative
TcCLB.508577.150	1.00854	2.01187	0.000930203	hypothetical protein, conserved
TcCLB.508625.50	1.00842	2.01171	0.00116785	6-phosphofructo-2-kinase/fructose-2,6-bisphosphatas, putative
TcCLB.507053.90	1.00787	2.01094	9.30224e-14	conserved protein, unknown function
TcCLB.503563.20	1.00767	2.01067	8.73401e-12	ADG2, putative
TcCLB.511169.29	1.00585	2.00813	9.83358e-13	tubulin-tyrsoine ligase-like protein, putative
TcCLB.509331.150	1.00532	2.00739	1.68358e-07	permease-like protein, putative
TcCLB.508957.30	1.00319	2.00443	7.27577e-11	hypothetical protein, conserved
TcCLB.503729.10	1.0005	2.0007	7.59247e-08	hypothetical protein, conserved
TcCLB.506509.20	0.999782	1.9997	4.15476e-07	hypothetical protein, conserved
TcCLB.509671.160	0.998744	1.99826	3.35047e-10	DNA polymerase epsilon subunit B, putative
TcCLB.511015.30	0.998633	1.99811	4.94058e-14	Trichohyalin, putative (fragment)
TcCLB.506991.10	0.996855	1.99564	1.71509e-10	hypothetical protein, conserved
TcCLB.508999.250	0.996773	1.99553	1.40508e-26	calpain-like cysteine peptidase (pseudogene), putative
TcCLB.506327.99	0.996198	1.99474	1.65212e-07	serine/threonine protein kinase, putative (fragment)
TcCLB.507583.60	0.995412	1.99365	0.000359313	hypothetical protein, conserved
TcCLB.509053.120	0.994786	1.99279	4.60336e-11	hypothetical protein, conserved
TcCLB.507085.170	0.992924	1.99021	0.063889	mucin TcMUCII, putative
TcCLB.503647.20	0.992186	1.9892	0.016486	hypothetical protein, conserved
TcCLB.507073.30	0.991249	1.98791	5.94346e-16	hypothetical protein, conserved
TcCLB.510663.40	0.990889	1.98741	8.01843e-15	hypothetical protein, conserved
TcCLB.507031.170	0.989662	1.98572	1.59662e-10	protein kinase (pseudogene), putative
TcCLB.510575.20	0.988521	1.98415	1.02979e-08	hypothetical protein, conserved
TcCLB.510729.60	0.987831	1.9832	0.000319027	hypothetical protein, conserved
TcCLB.511657.10	0.985239	1.97964	1.31214e-09	protein kinase, putative
TcCLB.506177.150	0.984916	1.9792	7.14746e-07	hypothetical protein, conserved
TcCLB.509437.103	0.98453	1.97867	1.01729e-12	dispersed gene family protein 1 (DGF-1, pseudogene), putative
TcCLB.508815.30	0.984266	1.97831	2.09372e-10	DNA repair protein, putative
TcCLB.506871.110	0.983874	1.97777	8.64341e-14	hypothetical protein, conserved
TcCLB.508693.20	0.983209	1.97686	8.49918e-19	DNA topoisomerase IB, large subunit
TcCLB.415803.10	0.982993	1.97656	5.02646e-05	hypothetical protein, conserved
TcCLB.504185.20	0.982191	1.97546	2.15203e-17	hypothetical protein, conserved
TcCLB.511277.610	0.981957	1.97514	3.06334e-13	surface protease GP63, putative
TcCLB.508501.70	0.981283	1.97422	0.0113609	mucin TcMUCII, putative
TcCLB.505183.130	0.981071	1.97393	1.11309e-18	sugar transporter, putative
TcCLB.506327.80	0.979383	1.97162	9.25838e-11	serine/threonine protein kinase, putative
TcCLB.510889.100	0.978897	1.97096	1.90005e-15	hypothetical protein, conserved
TcCLB.506577.170	0.978116	1.96989	6.60074e-05	hypothetical protein, conserved
TcCLB.506333.19	0.977931	1.96964	0.03202	kinesin, putative (fragment)
TcCLB.508153.420	0.977784	1.96944	1.18131e-14	hypothetical protein, conserved
TcCLB.511289.50	0.977375	1.96888	1.76766e-14	mitogen-activated protein kinase 9, putative
TcCLB.511817.10	0.977206	1.96865	0.0662496	hypothetical protein, conserved
TcCLB.506297.230	0.976385	1.96753	0.00259651	hypothetical protein, conserved
TcCLB.510099.30	0.975755	1.96667	1.75112e-12	hypothetical protein, conserved
TcCLB.506559.524	0.975393	1.96618	9.85387e-08	protein phosphatase 2C, putative
TcCLB.510187.390	0.974885	1.96548	3.61778e-22	Protein kinase domain, putative
TcCLB.504253.50	0.974484	1.96494	2.19896e-12	hypothetical protein, conserved
TcCLB.509985.30	0.974198	1.96455	5.32555e-15	hypothetical protein, conserved
TcCLB.510265.80	0.972803	1.96265	1.55913e-17	hypothetical protein, conserved
TcCLB.511807.160	0.971841	1.96134	2.96603e-05	hypothetical protein, conserved
TcCLB.503923.10	0.9718	1.96129	8.38338e-12	hypothetical protein, conserved
TcCLB.506789.270	0.970911	1.96008	9.1218e-17	hypothetical protein, conserved
TcCLB.507085.140	0.970826	1.95996	5.76342e-05	mucin TcMUCII, putative
TcCLB.509647.50	0.970152	1.95905	3.82083e-18	hypothetical protein, conserved
TcCLB.508257.240	0.969914	1.95872	5.13111e-14	hypothetical protein, conserved
TcCLB.510337.20	0.969009	1.9575	5.02897e-16	calpain-like cysteine peptidase, putative
TcCLB.506435.10	0.967941	1.95605	7.05525e-08	hypothetical protein, conserved
TcCLB.511287.100	0.967317	1.9552	4.09103e-12	hypothetical protein, conserved
TcCLB.506149.10	0.966761	1.95445	4.61384e-25	folate/pteridine transporter, putative
TcCLB.510689.60	0.965465	1.95269	2.27854e-15	Double RNA binding domain protein 7
TcCLB.505193.20	0.965008	1.95207	1.11254e-08	hypothetical protein, conserved
TcCLB.503411.30	0.963967	1.95067	1.56648e-05	hypothetical protein, conserved
TcCLB.506855.150	0.961965	1.94796	6.55705e-14	hypothetical protein, conserved
TcCLB.509999.120	0.961746	1.94767	0.000131718	RNA-binding protein, putative
TcCLB.508625.160	0.961061	1.94674	6.92769e-12	pumilio/PUF RNA binding protein 1, putative
TcCLB.510791.20	0.960578	1.94609	0.0729524	mucin TcMUCII, putative
TcCLB.510701.31	0.960512	1.946	0.0156717	hypothetical protein
TcCLB.508411.80	0.960242	1.94564	8.63558e-12	hypothetical protein, conserved
TcCLB.511161.10	0.959707	1.94491	0.00483503	hypothetical protein, conserved (pseudogene)
TcCLB.503499.24	0.959399	1.9445	0.0130128	hypothetical protein
TcCLB.509937.220	0.958246	1.94295	0.00260977	protein kinase, putative
TcCLB.504827.70	0.957777	1.94231	1.03856e-06	hypothetical protein, conserved
TcCLB.511025.80	0.95517	1.93881	2.40524e-08	hypothetical protein, conserved
TcCLB.511909.30	0.955016	1.9386	3.90374e-14	hypothetical protein, conserved
TcCLB.504069.100	0.954924	1.93848	7.56651e-05	RNA polymerase II, putative
TcCLB.503461.20	0.954713	1.93819	2.45855e-18	per-hexamer repeat protein 5, putative
TcCLB.404073.20	0.954253	1.93758	0.000447624	actin, putative (fragment)
TcCLB.509937.160	0.954158	1.93745	3.05919e-19	hypothetical protein, conserved
TcCLB.509791.140	0.953921	1.93713	1.64639e-11	hypothetical protein, conserved
TcCLB.509741.34	0.953838	1.93702	4.33173e-06	hypothetical protein, conserved
TcCLB.510669.5	0.953787	1.93695	0.000793996	ribulose-phosphate 3-epimerase, putative (fragment)
TcCLB.510519.14	0.952623	1.93539	1.10727e-06	hypothetical protein, conserved
TcCLB.508479.224	0.951162	1.93343	4.11072e-12	hypothetical protein, conserved
TcCLB.506041.20	0.950316	1.9323	1.0687e-06	hypothetical protein, conserved
TcCLB.506303.120	0.950284	1.93225	5.13111e-14	hypothetical protein, conserved
TcCLB.507743.9	0.950191	1.93213	2.00496e-12	tyrosine protein kinase, putative
TcCLB.506821.130	0.949948	1.9318	1.54665e-10	hypothetical protein, conserved
TcCLB.503773.20	0.948426	1.92977	6.72231e-13	hypothetical protein, conserved
TcCLB.509563.10	0.948248	1.92953	3.2973e-17	hypothetical protein, conserved
TcCLB.506873.20	0.947106	1.928	2.77151e-05	hypothetical protein, conserved
TcCLB.506883.100	0.945619	1.92602	1.77308e-18	GTP-binding protein, putative
TcCLB.506303.30	0.945467	1.92581	2.55495e-10	hypothetical protein, conserved
TcCLB.509683.90	0.945302	1.92559	0.0541976	hypothetical protein
TcCLB.422955.10	0.944111	1.924	9.83528e-05	hypothetical protein, conserved (pseudogene)
TcCLB.507025.60	0.943642	1.92338	0.00254623	RNA-binding protein, putative
TcCLB.508891.30	0.942237	1.92151	2.58774e-21	hypothetical protein, conserved
TcCLB.508411.50	0.942059	1.92127	8.91275e-08	hypothetical protein, conserved
TcCLB.508065.50	0.941846	1.92098	1.49883e-08	phosphatidylinositol-4-phosphate 5-kinase-like protein, putative
TcCLB.511825.250	0.941443	1.92045	1.6338e-10	hypothetical protein, conserved
TcCLB.508355.280	0.940244	1.91885	8.68581e-16	hypothetical protein, conserved
TcCLB.510187.520	0.938606	1.91668	4.44959e-13	hypothetical protein, conserved
TcCLB.510155.115	0.937768	1.91556	1.68599e-09	hypothetical protein, conserved
TcCLB.507069.60	0.936706	1.91415	0.000170558	mucin TcMUCII, putative
TcCLB.503617.10	0.93567	1.91278	9.38063e-21	protein kinase, putative
TcCLB.508507.20	0.935637	1.91273	3.74777e-10	hypothetical protein, conserved
TcCLB.506475.105	0.935549	1.91262	2.46244e-08	hypothetical protein, conserved
TcCLB.510625.79	0.934745	1.91155	0.0495284	mucin TcMUCII (pseudogene), putative
TcCLB.503825.19	0.934723	1.91152	9.33592e-07	protein kinase, putative
TcCLB.507539.49	0.934236	1.91088	0.000248566	hypothetical protein, conserved
TcCLB.509617.40	0.932524	1.90861	0.00290542	hypothetical protein, conserved
TcCLB.508689.10	0.932497	1.90858	2.62828e-13	hypothetical protein, conserved
TcCLB.504105.250	0.931547	1.90732	1.58902e-08	hypothetical protein
TcCLB.506459.280	0.930189	1.90553	1.35078e-09	hypothetical protein, conserved
TcCLB.511821.60	0.929639	1.9048	4.15933e-12	protein kinase, putative
TcCLB.503399.29	0.92931	1.90437	0.0164108	hydrolase-like protein
TcCLB.506821.160	0.927869	1.90246	1.05946e-12	hypothetical protein, conserved
TcCLB.511819.50	0.92731	1.90173	9.71995e-14	hypothetical protein, conserved
TcCLB.509911.20	0.927269	1.90167	2.14839e-07	hypothetical protein
TcCLB.506275.60	0.926626	1.90083	2.67487e-12	metallo-peptidase, Clan MC, Family M14, putative
TcCLB.511511.5	0.926181	1.90024	0.00131989	hypothetical protein
TcCLB.449759.9	0.924752	1.89836	0.00545513	hypothetical protein, conserved
TcCLB.510329.220	0.924404	1.8979	6.93728e-12	hypothetical protein, conserved
TcCLB.504131.80	0.922935	1.89597	1.81138e-10	hypothetical protein, conserved
TcCLB.508641.170	0.922228	1.89504	6.19486e-06	protein kinase, putative
TcCLB.511239.10	0.922214	1.89502	4.93997e-14	hypothetical protein, conserved
TcCLB.508027.80	0.921006	1.89343	1.96936e-09	hypothetical protein, conserved
TcCLB.511261.90	0.91993	1.89202	1.94271e-09	hypothetical protein, conserved
TcCLB.508639.10	0.919746	1.89178	2.97144e-08	trans-sialidase, putative
TcCLB.507851.70	0.917671	1.88906	4.28165e-05	hypothetical protein
TcCLB.511821.20	0.917575	1.88894	1.71841e-07	hypothetical protein, conserved
TcCLB.511663.40	0.917118	1.88834	0.0794523	trans-sialidase (pseudogene), putative
TcCLB.510187.470	0.916923	1.88808	0.000284032	hypothetical protein
TcCLB.510943.206	0.916366	1.88736	0.000342928	trans-sialidase, putative
TcCLB.508879.200	0.916174	1.8871	3.38841e-07	hypothetical protein, conserved
TcCLB.508355.5	0.915473	1.88619	0.0434715	receptor-type adenylate cyclase, putative (fragment)
TcCLB.506615.100	0.91443	1.88482	0.0306046	Mucin-associated surface protein (MASP), subgroup S008
TcCLB.506327.50	0.9139	1.88413	1.20964e-09	hypothetical protein, conserved
TcCLB.506991.19	0.913312	1.88336	6.5376e-09	hypothetical protein, conserved
TcCLB.503463.30	0.912798	1.88269	0.0683979	protein kinase, putative
TcCLB.508823.100	0.912189	1.8819	3.89644e-20	hypothetical protein, conserved
TcCLB.508059.24	0.911828	1.88143	1.13193e-09	hypothetical protein, conserved
TcCLB.508267.50	0.911664	1.88121	3.85433e-07	hypothetical protein, conserved
TcCLB.504161.59	0.911028	1.88038	8.60455e-11	transporter, putative
TcCLB.510831.10	0.910943	1.88027	4.72582e-05	Mucin-associated surface protein (MASP) (pseudogene)
TcCLB.509571.70	0.90926	1.87808	6.41766e-06	hypothetical protein, conserved
TcCLB.508613.10	0.908986	1.87772	0.00015104	hypothetical protein, conserved
TcCLB.510889.190	0.908713	1.87737	1.28925e-06	hypothetical protein, conserved
TcCLB.510331.10	0.908344	1.87689	0.000215023	trans-sialidase, Group III, putative
TcCLB.508521.50	0.908048	1.87651	0.0312424	surface protease GP63 (pseudogene), putative
TcCLB.507519.170	0.907689	1.87604	3.52753e-12	hypothetical protein, conserved
TcCLB.507765.140	0.907066	1.87523	1.62801e-10	hypothetical protein, conserved
TcCLB.510629.420	0.90585	1.87365	2.96069e-05	protein phosphatase 1, regulatory subunit, putative
TcCLB.511823.30	0.905375	1.87303	1.4434e-11	hypothetical protein, conserved
TcCLB.507949.20	0.90508	1.87265	2.16687e-11	RWD domain-containing protein
TcCLB.509207.120	0.904531	1.87194	8.39802e-16	hypothetical protein, conserved
TcCLB.504081.365	0.903908	1.87113	0.0852613	hypothetical protein
TcCLB.510099.50	0.903903	1.87112	1.39128e-08	hypothetical protein, conserved
TcCLB.509229.70	0.903161	1.87016	7.37155e-06	hypothetical protein, conserved
TcCLB.508153.150	0.902502	1.8693	3.03111e-10	hypothetical protein, conserved
TcCLB.506871.70	0.902394	1.86916	2.2775e-09	hypothetical protein, conserved
TcCLB.511863.30	0.902336	1.86909	3.25573e-13	Flagellum attachment zone protein 13
TcCLB.506009.30	0.90228	1.86902	5.44109e-14	TPR-repeat-containing chaperone protein DNAJ, putative
TcCLB.504741.60	0.901343	1.8678	1.49415e-13	transcription initiation protein, putative
TcCLB.508501.310	0.898975	1.86474	7.20115e-07	hypothetical protein, conserved
TcCLB.503399.10	0.897429	1.86274	3.75272e-08	hypothetical protein, conserved
TcCLB.507763.20	0.897422	1.86273	1.9938e-09	hypothetical protein
TcCLB.507207.10	0.896382	1.86139	2.01666e-10	hypothetical protein, conserved
TcCLB.511907.240	0.896312	1.8613	1.41574e-12	protein kinase, putative
TcCLB.506575.70	0.896183	1.86114	5.13111e-14	Present in the outer mitochondrial membrane proteome 41
TcCLB.467287.10	0.896041	1.86095	9.75017e-06	alpha-tubulin N-acetyltransferase, putative
TcCLB.511649.160	0.896033	1.86094	3.26531e-12	hypothetical protein, conserved
TcCLB.509857.40	0.895256	1.85994	1.06936e-06	hypothetical protein, conserved
TcCLB.511661.120	0.895013	1.85963	4.18556e-08	protein kinase, putative
TcCLB.509643.100	0.893362	1.8575	4.06941e-12	hypothetical protein, conserved
TcCLB.511261.71	0.892347	1.85619	1.36314e-10	hypothetical protein, conserved (pseudogene)
TcCLB.509877.50	0.892179	1.85598	4.50874e-06	glycosomal membrane protein, putative
TcCLB.509717.70	0.892058	1.85582	0.0199598	transportin2-like protein, putative
TcCLB.437575.18	0.890909	1.85434	0.000328936	transporter, putative
TcCLB.508199.30	0.890906	1.85434	0.00015104	hypothetical protein, conserved
TcCLB.511817.250	0.890163	1.85339	4.44707e-08	F-box and WD40 domain containing protein
TcCLB.506793.60	0.889605	1.85267	2.1604e-09	hypothetical protein, conserved
TcCLB.507029.10	0.889446	1.85246	1.34147e-08	hypothetical protein, conserved
TcCLB.511821.160	0.889005	1.8519	0.00997808	microtubial binding protein, putative
TcCLB.506477.20	0.887753	1.85029	5.72755e-14	vesicular-fusion protein nsf, putative
TcCLB.507515.120	0.887421	1.84987	5.94982e-10	sphingosine kinase A, B, putative
TcCLB.509607.50	0.887086	1.84944	0.0276887	protein kinase, putative
TcCLB.504069.40	0.886819	1.84909	1.72808e-07	hypothetical protein, conserved
TcCLB.507491.90	0.886116	1.84819	5.99256e-10	protein kinase, putative
TcCLB.508821.30	0.884531	1.84616	5.60019e-14	hypothetical protein
TcCLB.503413.4	0.884211	1.84576	0.000939975	Present in the outer mitochondrial membrane proteome 22 (fragment)
TcCLB.511825.190	0.882291	1.8433	6.46346e-09	hypothetical protein, conserved
TcCLB.504105.160	0.88155	1.84235	1.10913e-14	splicing factor ptsr1 interacting protein, putative
TcCLB.508479.140	0.881055	1.84172	2.0989e-05	hypothetical protein, conserved
TcCLB.506789.170	0.88094	1.84158	8.11252e-10	ATPase, putative
TcCLB.506229.64	0.880911	1.84154	0.000228462	conserved protein, unknown function
TcCLB.506175.50	0.880535	1.84106	9.88745e-14	hypothetical protein, conserved
TcCLB.503439.40	0.879316	1.8395	0.0621616	trans-sialidase (pseudogene), putative
TcCLB.508741.320	0.879156	1.8393	0.0172499	casein kinase II, alpha chain, putative
TcCLB.509001.20	0.878988	1.83908	1.13823e-10	hypothetical protein, conserved
TcCLB.508707.130	0.878751	1.83878	5.70314e-05	hypothetical protein, conserved
TcCLB.506585.50	0.877917	1.83772	8.36427e-13	hypothetical protein, conserved
TcCLB.509901.140	0.877439	1.83711	3.6881e-13	COP9 signalosome complex subunit 5, putative
TcCLB.508699.60	0.875903	1.83516	3.56819e-10	hypothetical protein, conserved
TcCLB.510687.90	0.874495	1.83337	5.29106e-12	hypothetical protein, conserved
TcCLB.508139.130	0.874409	1.83326	1.69127e-07	trans-sialidase, Group II, putative
TcCLB.506315.60	0.874365	1.8332	3.28284e-07	hypothetical protein, conserved
TcCLB.511263.50	0.874322	1.83315	0.00297235	hypothetical protein, conserved
TcCLB.505193.10	0.873939	1.83266	2.65982e-06	serine/threonine protein phosphatase-like protein, putative
TcCLB.506201.4	0.873368	1.83194	1.0547e-05	hypothetical protein, conserved
TcCLB.508667.40	0.872769	1.83117	4.10523e-05	hypothetical protein, conserved
TcCLB.479883.10	0.871931	1.83011	1.97142e-06	hypothetical protein, conserved
TcCLB.503999.20	0.871275	1.82928	2.05356e-08	Kinesin-13 5, putative
TcCLB.506139.40	0.870178	1.82789	2.72944e-06	Mucin-associated surface protein (MASP), subgroup S024
TcCLB.511255.660	0.869805	1.82742	0.0346556	mucin TcMUCII, putative
TcCLB.507633.101	0.868457	1.82571	0.106796	elongation factor 1-gamma (EF-1-gamma, pseudogene), putative
TcCLB.508409.300	0.868131	1.8253	7.59247e-08	hypothetical protein, conserved
TcCLB.509937.200	0.867637	1.82467	9.16012e-19	hypothetical protein, conserved
TcCLB.510889.200	0.867464	1.82445	2.54602e-08	hypothetical protein, conserved
TcCLB.511233.59	0.867364	1.82433	0.00443846	hypothetical protein, conserved
TcCLB.511277.115	0.867046	1.82392	1.14482e-14	hypothetical protein, conserved
TcCLB.507541.10	0.866808	1.82362	1.52494e-08	hypothetical protein, conserved
TcCLB.509561.30	0.866569	1.82332	4.57331e-05	citrate transporter, putative
TcCLB.509287.230	0.86625	1.82292	5.41319e-07	trans-sialidase, Group II, putative
TcCLB.509161.120	0.865769	1.82231	3.20284e-11	hypothetical protein, conserved
TcCLB.507663.20	0.865094	1.82146	5.12858e-16	hypothetical protein, conserved
TcCLB.510729.230	0.864826	1.82112	2.0306e-16	hypothetical protein, conserved
TcCLB.506041.60	0.864806	1.82109	5.06941e-09	hypothetical protein, conserved
TcCLB.460757.20	0.863979	1.82005	0.0619701	hypothetical protein (fragment)
TcCLB.511267.24	0.863967	1.82004	2.50156e-06	hypothetical protein, conserved
TcCLB.508153.1030	0.861685	1.81716	1.11404e-14	hypothetical protein, conserved
TcCLB.508593.130	0.861645	1.81711	4.79934e-14	hypothetical protein, conserved
TcCLB.511649.39	0.861641	1.8171	1.29354e-06	hypothetical protein, conserved
TcCLB.506581.20	0.861424	1.81683	1.29697e-11	hypothetical protein, conserved
TcCLB.511725.40	0.860545	1.81572	8.05334e-06	hypothetical protein, conserved
TcCLB.509527.40	0.859387	1.81427	0.103365	hypothetical protein
TcCLB.503939.30	0.859184	1.81401	6.13719e-07	ttaggg binding factor, putative
TcCLB.511725.230	0.858973	1.81375	1.06133e-14	protein kinase, putative
TcCLB.509663.44	0.857856	1.81234	0.00612135	hypothetical protein, conserved
TcCLB.506009.100	0.857537	1.81194	4.5644e-06	ADP-ribosylation factor-like protein, putative
TcCLB.511511.40	0.857256	1.81159	0.000188757	hypothetical protein, conserved
TcCLB.503847.60	0.856955	1.81121	9.74761e-08	hypothetical protein, conserved
TcCLB.507779.20	0.854644	1.80831	0.00418978	trans-sialidase (pseudogene), putative
TcCLB.504081.360	0.854129	1.80767	0.0591167	hypothetical protein
TcCLB.509229.60	0.853709	1.80714	1.99081e-14	hypothetical protein, conserved
TcCLB.510663.64	0.852844	1.80606	4.34802e-09	mitochondrial carrier protein, putative
TcCLB.509179.130	0.852751	1.80594	1.77389e-11	hypothetical protein, conserved
TcCLB.506559.530	0.852088	1.80511	1.12809e-08	protein phosphatase 2C, putative
TcCLB.506855.320	0.851502	1.80438	1.42877e-10	hypothetical protein, conserved
TcCLB.511517.130	0.851302	1.80413	2.02074e-13	hypothetical protein, conserved
TcCLB.508231.130	0.846814	1.79852	0.000183275	Cell division control protein 48, putative
TcCLB.508613.50	0.846207	1.79777	0.00379175	hypothetical protein, conserved
TcCLB.511907.89	0.845449	1.79682	1.56685e-06	hypothetical protein, conserved
TcCLB.507019.100	0.844158	1.79522	8.64338e-08	nuclear movement protein, putative
TcCLB.509459.40	0.842884	1.79363	6.88557e-05	hypothetical protein, conserved
TcCLB.510729.299	0.842247	1.79284	0.00348175	protein kinase, putative
TcCLB.510187.490	0.841083	1.79139	1.21825e-05	hypothetical protein, conserved
TcCLB.504741.30	0.84075	1.79098	3.86232e-06	protein phosphatase 2C, putative
TcCLB.508735.100	0.840616	1.79081	1.73224e-08	hypothetical protein, conserved
TcCLB.509683.80	0.83988	1.7899	0.000516146	adenylosuccinate synthetase, putative
TcCLB.508693.199	0.838772	1.78853	2.11676e-08	hypothetical protein, conserved
TcCLB.508027.120	0.838451	1.78813	2.55932e-08	hypothetical protein, conserved
TcCLB.503465.40	0.838317	1.78796	2.25421e-08	hypothetical protein
TcCLB.508871.160	0.838017	1.78759	0.000996064	hypothetical protein
TcCLB.510901.230	0.837578	1.78705	3.57109e-12	hypothetical protein, conserved
TcCLB.508855.10	0.835991	1.78508	2.17232e-07	trans-sialidase, putative
TcCLB.511323.60	0.835718	1.78474	2.44315e-09	hypothetical protein, conserved
TcCLB.508175.200	0.835144	1.78404	1.01857e-11	hypothetical protein, conserved
TcCLB.506297.250	0.835053	1.78392	1.69335e-06	palmitoyl acyltransferase 7, putative
TcCLB.508931.10	0.835031	1.7839	2.89427e-14	hypothetical protein
TcCLB.478283.10	0.8344	1.78312	3.18088e-05	hypothetical protein, conserved (pseudogene)
TcCLB.511163.24	0.833634	1.78217	1.35193e-08	hypothetical protein, conserved
TcCLB.511511.150	0.833104	1.78151	1.12994e-15	sphingosine 1-phosphate lyase, putative
TcCLB.509791.90	0.832687	1.781	0.000276529	hypothetical protein, conserved
TcCLB.508045.20	0.832625	1.78092	1.28244e-07	hypothetical protein, conserved
TcCLB.505037.50	0.832546	1.78083	2.40731e-11	small GTP-binding protein RAB6, putative
TcCLB.511817.20	0.83254	1.78082	0.0604769	hypothetical protein, conserved
TcCLB.510039.30	0.832493	1.78076	0.0826741	Mucin-associated surface protein (MASP), subgroup S008
TcCLB.511809.90	0.83167	1.77974	1.98814e-13	hypothetical protein, conserved
TcCLB.506201.70	0.831606	1.77967	2.62994e-09	serine/threonine-protein phosphatase PP1 alpha
TcCLB.506559.517	0.831405	1.77942	3.08282e-11	hypothetical protein, conserved
TcCLB.503581.30	0.831378	1.77938	1.17663e-17	hypothetical protein, conserved
TcCLB.511245.40	0.830511	1.77832	3.46758e-06	hypothetical protein
TcCLB.506123.30	0.829571	1.77716	8.63558e-12	protein kinase, putative
TcCLB.507765.20	0.829221	1.77673	6.55178e-17	PUF nine target 1
TcCLB.511263.30	0.828812	1.77622	0.0020306	hypothetical protein, conserved
TcCLB.509611.70	0.828739	1.77613	2.95993e-08	hypothetical protein, conserved
TcCLB.508917.30	0.828667	1.77604	1.61047e-13	kinesin, putative
TcCLB.505939.65	0.828358	1.77566	0.000390284	hypothetical protein, conserved
TcCLB.511825.180	0.828279	1.77557	0.0736122	ATP-dependent DEAD/H RNA helicase, putative
TcCLB.510657.110	0.828194	1.77546	2.46491e-11	hypothetical protein, conserved
TcCLB.508027.40	0.826932	1.77391	1.5736e-17	folate/pteridine transporter, putative
TcCLB.511165.80	0.82536	1.77198	0.0927658	protein kinase, putative
TcCLB.506319.20	0.824911	1.77143	3.67049e-12	hypothetical protein, conserved
TcCLB.508593.100	0.824095	1.77042	2.30418e-10	hypothetical protein, conserved
TcCLB.510731.40	0.823636	1.76986	1.01728e-07	katanin, putative
TcCLB.511727.230	0.823039	1.76913	1.82798e-12	Repressor of differentiation kinase 1, putative
TcCLB.508479.290	0.822863	1.76891	0.120208	vacuolar sorting protein, putative
TcCLB.508153.440	0.822581	1.76857	4.86612e-13	poly(A) polymerase, putative
TcCLB.508601.40	0.821992	1.76785	3.79545e-06	hypothetical protein, conserved
TcCLB.511463.4	0.820704	1.76627	0.0190179	actin, putative
TcCLB.507087.40	0.820488	1.766	0.0142319	kinesin, putative
TcCLB.509569.50	0.820433	1.76594	8.63558e-12	guanine nucleotide exchange factor subunit GCD7
TcCLB.508669.30	0.819572	1.76488	1.72896e-06	hypothetical protein
TcCLB.508897.90	0.819395	1.76467	4.61954e-12	hypothetical protein, conserved
TcCLB.508461.120	0.81916	1.76438	4.15476e-07	hypothetical protein, conserved
TcCLB.511385.90	0.819134	1.76435	1.36911e-14	hypothetical protein, conserved
TcCLB.511629.40	0.819107	1.76431	0.00177928	hypothetical protein, conserved
TcCLB.510359.40	0.818206	1.76321	1.20182e-08	hypothetical protein, conserved
TcCLB.506321.210	0.817216	1.762	0.0427386	mucin TcMUCII, putative
TcCLB.508043.20	0.817062	1.76181	3.34782e-05	metallo-beta-lactamase-like protein, putative
TcCLB.508231.120	0.816722	1.7614	1.40016e-05	trans-sialidase (pseudogene), putative
TcCLB.510041.30	0.816385	1.76099	0.045848	hypothetical protein, conserved (fragment)
TcCLB.509211.10	0.816244	1.76082	1.38429e-07	hypothetical protein, conserved
TcCLB.504001.6	0.815269	1.75963	0.0368182	protein kinase, putative
TcCLB.508961.40	0.814767	1.75901	2.0692e-09	hypothetical protein, conserved
TcCLB.506247.310	0.814708	1.75894	3.77469e-11	hypothetical protein, conserved
TcCLB.506851.10	0.814669	1.75889	4.84553e-13	NIMA-related kinase, putative
TcCLB.506301.20	0.813656	1.75766	3.98934e-13	Golgi reassembly stacking protein (GRASP homologue), putative
TcCLB.508119.190	0.813421	1.75737	2.94838e-09	hypothetical protein, conserved
TcCLB.509429.250	0.81333	1.75726	7.12409e-11	ubiquitin hydrolase, putative
TcCLB.508153.80	0.812695	1.75649	3.0242e-06	DNA replication complex GINS protein SLD5, putative
TcCLB.508871.105	0.811613	1.75517	0.0423623	hypothetical protein
TcCLB.506145.10	0.810713	1.75408	4.52567e-10	hypothetical protein, conserved
TcCLB.511281.50	0.809798	1.75297	6.37522e-08	surface protease GP63, putative
TcCLB.507915.10	0.808865	1.75183	0.00108804	hypothetical protein, conserved
TcCLB.503999.40	0.808724	1.75166	0.000392449	Spindle assembly abnormal 4
TcCLB.509051.50	0.808307	1.75116	1.28417e-09	hypothetical protein, conserved
TcCLB.506999.120	0.808226	1.75106	8.50297e-08	hypothetical protein, conserved
TcCLB.506793.100	0.807508	1.75019	8.60733e-11	hypothetical protein, conserved
TcCLB.509229.40	0.806695	1.7492	2.56388e-11	hypothetical protein, conserved
TcCLB.511657.20	0.806613	1.7491	3.00868e-12	protein kinase, putative
TcCLB.508117.20	0.806369	1.7488	0.145595	Mucin-associated surface protein (MASP) (pseudogene)
TcCLB.508965.39	0.806153	1.74854	2.41162e-10	hypothetical protein, conserved
TcCLB.510421.310	0.806041	1.74841	2.26235e-11	hypothetical protein, conserved
TcCLB.506537.260	0.804881	1.747	0.0600546	protein kinase, putative
TcCLB.510421.29	0.804808	1.74691	0.000449274	CAAX prenyl protease 2, putative
TcCLB.505171.40	0.803982	1.74591	9.66988e-08	hypothetical protein, conserved
TcCLB.507539.40	0.803931	1.74585	5.03201e-05	cell cycle sequence binding phosphoprotein (RBP33), putative
TcCLB.503563.29	0.803525	1.74536	0.116092	hypothetical protein
TcCLB.511903.300	0.803144	1.7449	0.130409	hypothetical protein, conserved (pseudogene)
TcCLB.509253.20	0.80314	1.7449	3.61543e-10	tubulin tyrosine ligase, putative
TcCLB.510657.70	0.803077	1.74482	0.000527777	hypothetical protein, conserved (pseudogene)
TcCLB.511817.80	0.803072	1.74481	0.000685448	protein kinase, putative
TcCLB.508507.9	0.802453	1.74406	0.0770309	hypothetical protein, conserved
TcCLB.509799.40	0.802241	1.74381	1.57675e-13	hypothetical protein, conserved
TcCLB.508267.30	0.801037	1.74235	1.03653e-05	hypothetical protein, conserved
TcCLB.506957.140	0.801004	1.74231	2.34141e-09	phosphatidylinositol-4-phosphate 5-kinase-like, putative
TcCLB.507895.160	0.800792	1.74206	3.42805e-06	hypothetical protein, conserved
TcCLB.508495.50	0.80072	1.74197	0.000892846	mucin TcMUCII, putative
TcCLB.509493.120	0.80063	1.74186	0.151694	hypothetical protein
TcCLB.509399.140	0.800085	1.7412	2.54255e-07	hypothetical protein, conserved
TcCLB.509319.100	0.800012	1.74112	1.45708e-05	hypothetical protein, conserved
TcCLB.504105.180	0.799904	1.74099	8.38461e-10	hypothetical protein, conserved
TcCLB.509663.37	0.799823	1.74089	6.44381e-06	hypothetical protein, conserved
TcCLB.510519.80	0.799677	1.74071	1.36153e-08	hypothetical protein, conserved
TcCLB.508261.29	0.799172	1.7401	0.140149	mucin TcMUCII (pseudogene), putative
TcCLB.510735.100	0.79914	1.74006	0.00095063	hypothetical protein, conserved
TcCLB.503791.20	0.798617	1.73943	0.000562622	hypothetical protein, conserved
TcCLB.503995.20	0.797632	1.73825	1.9257e-07	hypothetical protein, conserved
TcCLB.504109.30	0.797516	1.73811	1.20075e-13	hypothetical protein, conserved
TcCLB.506445.10	0.796932	1.7374	5.5134e-05	actin-like protein, putative
TcCLB.508051.40	0.79681	1.73726	0.000335446	hypothetical protein, conserved
TcCLB.503879.90	0.796069	1.73636	1.02774e-10	hypothetical protein, conserved
TcCLB.507895.69	0.795678	1.73589	1.1418e-07	hypothetical protein, conserved
TcCLB.511245.120	0.795403	1.73556	1.65027e-06	hypothetical protein, conserved
TcCLB.511651.10	0.794735	1.73476	0.0022596	ATP-dependent DEAD/H RNA helicase, putative
TcCLB.506459.250	0.794661	1.73467	0.0045237	hypothetical protein, conserved
TcCLB.506137.10	0.793495	1.73327	8.74297e-06	surface protease GP63, putative
TcCLB.511459.70	0.792657	1.73226	0.0484192	hypothetical protein, conserved
TcCLB.507951.60	0.792546	1.73213	2.53393e-09	hypothetical protein, conserved
TcCLB.511771.171	0.791952	1.73142	0.0186931	hypothetical protein
TcCLB.507991.70	0.791585	1.73098	1.39302e-08	hypothetical protein, conserved
TcCLB.503917.50	0.791547	1.73093	0.000672416	hypothetical protein, conserved
TcCLB.508799.100	0.791196	1.73051	0.110523	hypothetical protein, conserved
TcCLB.508153.140	0.791194	1.73051	0.000433839	mitogen-activated protein kinase kinase 1
TcCLB.503539.20	0.791022	1.7303	5.89108e-05	Putative intraflagellar transport protein A1
TcCLB.507025.50	0.790631	1.72983	0.000546676	RNA-binding protein, putative
TcCLB.506577.130	0.789894	1.72895	1.44127e-08	protein phosphatase 2A regulatory subunit, putative
TcCLB.503987.50	0.789891	1.72894	5.28238e-05	hypothetical protein, conserved
TcCLB.506435.370	0.789708	1.72873	3.716e-08	surface protease GP63, putative
TcCLB.509733.50	0.788533	1.72732	5.64432e-09	hypothetical protein, conserved
TcCLB.509065.79	0.788496	1.72727	4.68809e-08	hypothetical protein, conserved
TcCLB.510305.30	0.788241	1.72697	3.75564e-08	lipin, putative
TcCLB.507051.11	0.788199	1.72692	0.0161627	trans-sialidase, putative (fragment)
TcCLB.511383.30	0.788136	1.72684	5.41266e-07	U1 small nuclear ribonucleoprotein, putative
TcCLB.509215.16	0.787466	1.72604	8.99944e-06	GlcNAc-PI synthesis protein
TcCLB.503521.10	0.787413	1.72598	4.6948e-11	hypothetical protein
TcCLB.507209.60	0.78715	1.72566	2.23523e-09	hypothetical protein, conserved
TcCLB.510945.60	0.786254	1.72459	1.48987e-09	hypothetical protein, conserved
TcCLB.508119.200	0.785494	1.72368	4.44076e-12	hypothetical protein
TcCLB.506905.30	0.785456	1.72364	1.50981e-05	hypothetical protein, conserved
TcCLB.508361.9	0.784317	1.72228	0.0731967	hypothetical protein
TcCLB.509053.10	0.784246	1.72219	4.9339e-06	ubiquitin-protein ligase, putative
TcCLB.511223.20	0.784019	1.72192	0.161953	trans-sialidase, putative
TcCLB.511283.280	0.783822	1.72169	1.02031e-05	Serine/threonine-protein kinase Nek1-related, putative
TcCLB.509047.110	0.783472	1.72127	1.50592e-06	rac serine-threonine kinase, putative
TcCLB.508897.70	0.781927	1.71943	8.46759e-06	ADP-ribosylation factor family, putative
TcCLB.510901.110	0.781655	1.7191	7.9589e-09	hypothetical protein, conserved
TcCLB.509561.9	0.780766	1.71804	0.000420363	FLA1-binding protein
TcCLB.510223.5	0.780687	1.71795	0.00801704	translation initiation factor eIF2B delta subunit, putative
TcCLB.508543.180	0.78011	1.71726	2.8784e-05	hypothetical protein, conserved
TcCLB.509713.30	0.779862	1.71697	4.58487e-25	hypothetical protein, conserved
TcCLB.504259.10	0.779426	1.71645	0.028962	hypothetical protein, conserved
TcCLB.508873.50	0.778995	1.71593	0.0235082	hypothetical protein
TcCLB.509799.5	0.778973	1.71591	0.00875413	hypothetical protein, conserved
TcCLB.511367.240	0.778958	1.71589	1.06861e-14	PIWI-like protein
TcCLB.506435.100	0.778507	1.71536	8.13145e-06	hypothetical protein, conserved
TcCLB.506957.120	0.777853	1.71458	2.57456e-14	hypothetical protein, conserved
TcCLB.510359.30	0.777668	1.71436	1.22879e-05	hypothetical protein, conserved
TcCLB.503823.30	0.777194	1.71379	4.23132e-05	hypothetical protein, conserved
TcCLB.506701.29	0.776279	1.71271	0.000241723	hypothetical protein, conserved
TcCLB.511859.200	0.776259	1.71268	3.4674e-17	hypothetical protein, conserved
TcCLB.508965.60	0.775632	1.71194	1.50322e-09	rac serine-threonine kinase, putative
TcCLB.509733.60	0.775414	1.71168	2.03459e-12	hypothetical protein
TcCLB.506681.70	0.774554	1.71066	9.91835e-05	serine-threonine dehydratase, putative
TcCLB.506559.250	0.772627	1.70838	4.04858e-08	hypothetical protein, conserved
TcCLB.511505.30	0.77251	1.70824	0.000813098	hypothetical protein, conserved
TcCLB.507705.20	0.772493	1.70822	4.10873e-05	hypothetical protein, conserved
TcCLB.509671.130	0.772312	1.70801	0.000294773	trypanin-like protein (pseudogene), putative
TcCLB.506959.80	0.771833	1.70744	3.78245e-08	hypothetical protein, conserved
TcCLB.508503.70	0.771767	1.70736	8.77511e-05	hypothetical protein, conserved
TcCLB.511203.5	0.771623	1.70719	0.00335724	hypothetical protein, conserved
TcCLB.503721.20	0.77036	1.7057	3.61036e-06	hypothetical protein, conserved
TcCLB.506559.4	0.769897	1.70515	0.000161993	hypothetical protein, conserved (fragment)
TcCLB.503567.9	0.769814	1.70505	NA	hypothetical protein, conserved
TcCLB.507081.90	0.769677	1.70489	5.97856e-07	hypothetical protein, conserved
TcCLB.506275.40	0.769634	1.70484	1.93032e-05	hypothetical protein, conserved
TcCLB.509339.10	0.769262	1.7044	0.00153586	hypothetical protein, conserved
TcCLB.507021.50	0.769038	1.70413	3.31149e-08	kinesin, putative
TcCLB.506159.5	0.768875	1.70394	0.122342	trans-sialidase, putative (fragment)
TcCLB.506559.454	0.767803	1.70267	6.714e-08	GTP-binding protein, putative
TcCLB.508657.10	0.76719	1.70195	9.88195e-08	hypothetical protein, conserved
TcCLB.511649.140	0.767104	1.70185	7.10663e-06	hypothetical protein, conserved
TcCLB.509113.10	0.766701	1.70137	5.9986e-06	Mucin-associated surface protein (MASP) (pseudogene)
TcCLB.506781.30	0.764893	1.69924	0.0326403	mucin TcMUCII, putative
TcCLB.506871.160	0.764864	1.69921	1.64452e-05	RNA capping enzyme, cytoplasmic
TcCLB.508521.40	0.764795	1.69913	0.173156	hypothetical protein
TcCLB.510943.184	0.764259	1.6985	0.000272241	tyrosine phosphatase, putative
TcCLB.506425.20	0.764229	1.69846	0.0102258	hypothetical protein
TcCLB.508187.30	0.763289	1.69736	0.00496155	surface protease GP63, putative (fragment)
TcCLB.509875.200	0.763009	1.69703	8.92018e-06	copper homeostasis protein, putative
TcCLB.511287.124	0.762771	1.69675	9.51513e-08	peroxin 13, putative
TcCLB.511003.200	0.762197	1.69607	0.165336	hypothetical protein, conserved
TcCLB.509161.100	0.761399	1.69513	1.54694e-09	hypothetical protein, conserved
TcCLB.511657.70	0.761329	1.69505	3.40244e-09	hypothetical protein, conserved
TcCLB.509647.60	0.760446	1.69401	1.38275e-11	hypothetical protein, conserved
TcCLB.503593.30	0.760277	1.69382	2.97769e-12	hypothetical protein, conserved
TcCLB.507515.140	0.759856	1.69332	2.27942e-05	oxysterol-binding protein, putative
TcCLB.509629.10	0.759747	1.69319	5.37128e-16	trans-sialidase, Group III, putative
TcCLB.507017.130	0.759717	1.69316	0.000109811	hypothetical protein
TcCLB.508815.60	0.759032	1.69235	1.15354e-05	hypothetical protein, conserved
TcCLB.510039.50	0.758986	1.6923	0.0605126	hypothetical protein, conserved
TcCLB.509859.20	0.758978	1.69229	0.000431454	hypothetical protein, conserved
TcCLB.511809.10	0.758608	1.69186	1.78546e-09	hypothetical protein
TcCLB.506295.60	0.758542	1.69178	8.74482e-06	hypothetical protein, conserved
TcCLB.508981.30	0.757949	1.69109	0.000161067	hypothetical protein, conserved
TcCLB.506247.370	0.757903	1.69103	7.6377e-08	hypothetical protein, conserved
TcCLB.511003.80	0.757744	1.69084	1.09546e-08	hypothetical protein, conserved
TcCLB.508461.130	0.757246	1.69026	1.57947e-11	elongation factor 1-alpha (ef-1-alpha), putative
TcCLB.508501.220	0.756583	1.68948	7.43322e-08	hypothetical protein, conserved
TcCLB.508479.320	0.756228	1.68907	0.00281576	hypothetical protein, conserved
TcCLB.503891.70	0.756186	1.68902	8.43769e-08	ribonuclease HII, putative
TcCLB.506175.120	0.755881	1.68866	4.76458e-08	hypothetical protein, conserved
TcCLB.506835.50	0.755306	1.68799	6.53447e-05	hypothetical protein
TcCLB.506327.40	0.755135	1.68779	1.61364e-10	hypothetical protein, conserved
TcCLB.506305.29	0.754999	1.68763	4.75122e-14	hypothetical protein, conserved
TcCLB.508707.320	0.754801	1.6874	2.07839e-09	hypothetical protein, conserved
TcCLB.503823.120	0.754774	1.68737	2.46751e-07	hypothetical protein, conserved
TcCLB.509719.80	0.754607	1.68717	4.9995e-06	hypothetical protein, conserved
TcCLB.458759.14	0.754386	1.68691	0.0747419	hypothetical protein, conserved
TcCLB.509399.190	0.754339	1.68686	0.113244	pumilio/PUF RNA binding protein 4, putative
TcCLB.509671.172	0.754228	1.68673	2.87117e-06	hypothetical protein, conserved
TcCLB.463451.10	0.753284	1.68563	6.6938e-08	hypothetical protein, conserved
TcCLB.508859.20	0.752884	1.68516	1.54027e-05	hypothetical protein, conserved
TcCLB.510361.220	0.751541	1.68359	0.128193	hypothetical protein
TcCLB.510693.210	0.751467	1.6835	0.157356	hypothetical protein
TcCLB.504109.120	0.751342	1.68336	0.00010927	hypothetical protein, conserved
TcCLB.507897.30	0.751149	1.68313	8.42829e-14	serine/threonine-protein kinase a, putative
TcCLB.507219.9	0.750626	1.68252	2.64212e-06	trans-sialidase, putative
TcCLB.508637.130	0.750194	1.68202	0.0424204	hypothetical protein, conserved
TcCLB.511259.30	0.749763	1.68152	0.154785	hypothetical protein
TcCLB.507103.29	0.749408	1.6811	0.0011659	hypothetical protein, conserved (fragment)
TcCLB.511817.130	0.748273	1.67978	0.000292806	hypothetical protein, conserved
TcCLB.508501.140	0.748181	1.67967	0.0724754	mucin TcMUCII, putative
TcCLB.509643.40	0.747754	1.67918	1.12257e-08	hypothetical protein, conserved
TcCLB.510675.9	0.747622	1.67902	0.000454089	dispersed gene family protein 1 (DGF-1), putative (fragment)
TcCLB.507049.41	0.747443	1.67882	2.40357e-05	hypothetical protein, conserved
TcCLB.508817.119	0.747127	1.67845	6.04133e-08	hypothetical protein, conserved
TcCLB.509507.49	0.746666	1.67791	0.000791883	mitotic cyclin, putative
TcCLB.504197.10	0.746579	1.67781	0.083882	hypothetical protein
TcCLB.509745.10	0.746177	1.67734	3.62218e-10	hypothetical protein, conserved
TcCLB.511367.159	0.745131	1.67613	2.90461e-11	hypothetical protein, conserved (pseudogene)
TcCLB.508027.90	0.744313	1.67518	1.1508e-08	hypothetical protein, conserved
TcCLB.506831.60	0.744166	1.67501	0.0117915	hypothetical protein, conserved
TcCLB.506137.20	0.74358	1.67433	0.120208	hypothetical protein
TcCLB.506851.30	0.743313	1.67402	0.127128	hypothetical protein, conserved
TcCLB.476733.20	0.743245	1.67394	4.66044e-08	hypothetical protein, conserved
TcCLB.509317.50	0.742889	1.67352	0.00243227	dolichyl-P-Man:GDP-Man7GlcNAc2-PP-dolichyl alpha-1,6-mannosyltransferase, putative
TcCLB.503693.20	0.742835	1.67346	0.00336175	hypothetical protein, conserved
TcCLB.510437.45	0.742747	1.67336	0.0425639	hypothetical protein
TcCLB.508919.80	0.741838	1.6723	1.05516e-07	hypothetical protein, conserved
TcCLB.507771.40	0.741747	1.6722	0.000115152	phosphoglycerate mutase, putative
TcCLB.509607.20	0.741091	1.67144	0.143234	hypothetical protein, conserved
TcCLB.509695.60	0.740331	1.67056	6.51852e-07	hypothetical protein, conserved
TcCLB.510225.40	0.740227	1.67044	8.41964e-13	hypothetical protein, conserved
TcCLB.511317.50	0.740178	1.67038	0.00010606	hypothetical protein, conserved
TcCLB.511481.20	0.74008	1.67027	0.000572291	hypothetical protein, conserved
TcCLB.510819.20	0.739764	1.6699	4.07501e-10	hypothetical protein, conserved
TcCLB.467795.19	0.739245	1.6693	0.000231723	hypothetical protein, conserved
TcCLB.508545.30	0.739056	1.66908	0.053416	hypothetical protein, conserved
TcCLB.506789.210	0.738834	1.66883	1.56154e-10	paraflagellar rod protein, putative
TcCLB.511385.60	0.738742	1.66872	6.22754e-05	hypothetical protein
TcCLB.507503.20	0.737891	1.66774	2.94017e-05	glycine dehydrogenase [decarboxylating] (pseudogene), putative
TcCLB.503731.9	0.737581	1.66738	0.00528673	hypothetical protein (fragment)
TcCLB.508693.60	0.737411	1.66718	6.84399e-05	hypothetical protein, conserved
TcCLB.508543.10	0.736311	1.66591	2.0197e-11	DNA polymerase sigma, putative
TcCLB.508695.10	0.73563	1.66512	0.00273474	hypothetical protein, conserved
TcCLB.507081.80	0.735526	1.665	8.84231e-08	hypothetical protein, conserved
TcCLB.509037.20	0.735209	1.66464	0.000746562	surface protease GP63, putative
TcCLB.511725.280	0.734558	1.66389	6.44078e-12	hypothetical protein, conserved
TcCLB.509287.20	0.73288	1.66195	1.1079e-06	protein kinase, putative
TcCLB.508909.10	0.7325	1.66152	1.20251e-05	OSM3-like kinesin, putative
TcCLB.510265.4	0.731367	1.66021	0.0108333	hypothetical protein, conserved
TcCLB.508175.280	0.730925	1.6597	2.60968e-13	hypothetical protein, conserved
TcCLB.510329.370	0.730045	1.65869	0.000157687	hypothetical protein, conserved
TcCLB.511317.79	0.729931	1.65856	0.026228	OSM3-like kinesin, putative
TcCLB.511817.60	0.729337	1.65788	0.00218965	hypothetical protein, conserved
TcCLB.509527.90	0.729303	1.65784	2.12582e-07	trans-sialidase (pseudogene), putative
TcCLB.504161.40	0.728506	1.65692	4.58004e-08	hypothetical protein, conserved
TcCLB.504013.110	0.727996	1.65634	0.0251014	Serine/threonine-protein phosphatase 2A catalytic subunit, putative
TcCLB.506011.10	0.727933	1.65626	9.08627e-19	hypothetical protein, conserved
TcCLB.508173.160	0.727851	1.65617	5.2844e-13	hypothetical protein, conserved
TcCLB.506435.70	0.727059	1.65526	1.36673e-10	hypothetical protein, conserved (pseudogene)
TcCLB.505267.60	0.726414	1.65452	0.00478992	trans-sialidase (pseudogene), putative
TcCLB.506679.210	0.725988	1.65403	5.85142e-11	RNA editing complex protein MP61, putative
TcCLB.506559.364	0.725939	1.65398	1.71321e-09	hypothetical protein, conserved
TcCLB.507053.130	0.725592	1.65358	2.45927e-06	hypothetical protein, conserved
TcCLB.506985.60	0.725291	1.65323	0.000111302	inositol polyphosphate kinase-like protein, putative
TcCLB.510897.10	0.725172	1.6531	0.165244	cullin 2, putative
TcCLB.509569.150	0.724408	1.65222	0.00154076	hypothetical protein, conserved
TcCLB.509049.30	0.723613	1.65131	5.92133e-11	hypothetical protein, conserved
TcCLB.508961.4	0.722647	1.65021	8.97797e-05	ADP-ribosylation factor, putative
TcCLB.511167.110	0.722443	1.64997	4.32271e-10	hypothetical protein, conserved
TcCLB.508895.70	0.721932	1.64939	5.92941e-06	membrane protein, putative
TcCLB.511725.240	0.721868	1.64932	1.03674e-12	hypothetical protein, conserved
TcCLB.511289.100	0.720995	1.64832	0.0657776	hypothetical protein, conserved
TcCLB.511817.230	0.720722	1.64801	2.31843e-07	hypothetical protein, conserved
TcCLB.509937.50	0.719917	1.64709	1.45461e-12	hypothetical protein, conserved
TcCLB.510361.120	0.719508	1.64662	0.0319895	hypothetical protein
TcCLB.508221.310	0.71741	1.64423	0.0570557	trans-sialidase (pseudogene), putative
TcCLB.508461.4	0.717193	1.64398	9.63138e-06	Spindle assembly abnormal protein 6 homolog (fragment)
TcCLB.509855.10	0.716829	1.64357	2.00198e-08	hypothetical protein, conserved
TcCLB.511261.40	0.716265	1.64292	0.0102094	hypothetical protein
TcCLB.509237.120	0.71614	1.64278	4.95201e-12	calpain-like cysteine peptidase, putative
TcCLB.506479.100	0.716071	1.6427	2.66044e-05	hypothetical protein, conserved
TcCLB.508427.30	0.715815	1.64241	0.11184	surface protease GP63 (pseudogene), putative
TcCLB.510969.30	0.714999	1.64148	0.000326813	hypothetical protein, conserved
TcCLB.410049.10	0.714554	1.64098	0.171765	hypothetical protein, conserved
TcCLB.511725.160	0.713408	1.63967	6.70298e-07	hypothetical protein, conserved
TcCLB.511287.80	0.713302	1.63955	0.00049885	hypothetical protein, conserved
TcCLB.509607.60	0.712721	1.63889	0.000133363	hypothetical protein
TcCLB.507951.290	0.712674	1.63884	7.03755e-05	hypothetical protein, conserved
TcCLB.506855.20	0.712588	1.63874	3.06777e-09	hypothetical protein, conserved
TcCLB.511825.90	0.712287	1.6384	0.00235106	hypothetical protein, conserved
TcCLB.511483.20	0.711976	1.63805	2.31926e-06	hypothetical protein, conserved
TcCLB.507491.130	0.711969	1.63804	6.28502e-08	hypothetical protein, conserved
TcCLB.508523.50	0.711068	1.63702	2.26852e-08	trans-sialidase, Group II, putative
TcCLB.509561.39	0.710922	1.63685	3.01189e-08	hypothetical protein, conserved
TcCLB.508533.50	0.710652	1.63654	9.00793e-13	hypothetical protein, conserved
TcCLB.509527.30	0.710551	1.63643	0.145555	hypothetical protein, conserved
TcCLB.510657.130	0.709815	1.63559	1.45708e-05	hypothetical protein, conserved
TcCLB.511807.130	0.709424	1.63515	0.157034	hypothetical protein, conserved
TcCLB.507233.110	0.708833	1.63448	3.86492e-11	mismatch repair protein MSH4, putative
TcCLB.416143.10	0.708771	1.63441	0.0548637	Lys-63-specific deubiquitinase BRCC36, putative
TcCLB.511817.120	0.708273	1.63385	6.10267e-07	hypothetical protein, conserved
TcCLB.508873.470	0.708028	1.63357	0.048862	hypothetical protein
TcCLB.510359.550	0.707418	1.63288	0.163105	Mucin-associated surface protein (MASP), subgroup S103
TcCLB.506305.5	0.707206	1.63264	0.00688158	hypothetical protein, conserved
TcCLB.511491.80	0.706812	1.63219	8.6582e-07	mitogen-activated protein kinase, putative
TcCLB.511517.90	0.706773	1.63215	4.18189e-09	hypothetical protein, conserved
TcCLB.467795.9	0.706639	1.632	6.35254e-06	diphthamide synthesis protein, putative
TcCLB.510659.100	0.706441	1.63177	0.00149107	hypothetical protein, conserved
TcCLB.511761.40	0.706311	1.63163	0.0234465	hypothetical protein, conserved
TcCLB.511861.60	0.705965	1.63124	0.00781753	beta galactofuranosyl glycosyltransferase (pseudogene), putative
TcCLB.510201.5	0.705948	1.63122	0.149031	Mucin-associated surface protein (MASP)
TcCLB.508827.110	0.705844	1.6311	8.6317e-11	leucine-rich repeat protein (LRRP), putative
TcCLB.511261.60	0.705344	1.63053	4.62094e-09	hypothetical protein, conserved
TcCLB.432629.10	0.705158	1.63032	0.0119118	trans-sialidase (pseudogene), putative
TcCLB.507061.10	0.704956	1.63009	0.0268113	hypothetical protein
TcCLB.508059.10	0.704611	1.62971	0.00181698	hypothetical protein, conserved
TcCLB.509571.40	0.704477	1.62955	3.2196e-06	hypothetical protein, conserved
TcCLB.509603.19	0.704371	1.62943	0.00873872	malonyl-CoA decarboxylase, mitochondrial precursor, putative (fragment)
TcCLB.510329.70	0.704197	1.62924	0.0648885	cdc2-related kinase 10, putative
TcCLB.440099.28	0.703593	1.62856	0.000905318	protein kinase, putative
TcCLB.506139.2	0.703395	1.62833	0.21484	trans-sialidase (pseudogene), putative
TcCLB.509177.40	0.703288	1.62821	1.2416e-07	hypothetical protein, conserved
TcCLB.507233.10	0.702935	1.62781	0.00250148	trans-sialidase, Group III, putative
TcCLB.506275.50	0.702442	1.62726	8.99944e-06	Golgi SNAP receptor complex member 1, putative
TcCLB.506321.101	0.702106	1.62688	0.147016	hypothetical protein, conserved (pseudogene)
TcCLB.510657.80	0.701451	1.62614	7.92572e-05	hypothetical protein, conserved
TcCLB.506199.30	0.701196	1.62585	0.00236211	hypothetical protein, conserved
TcCLB.509937.110	0.700504	1.62507	1.07585e-07	hypothetical protein, conserved
TcCLB.506619.49	0.700408	1.62496	0.083157	ras-related protein Rab21, putative
TcCLB.506709.10	0.699983	1.62449	2.21878e-05	hypothetical protein, conserved
TcCLB.504173.30	0.699574	1.62403	0.170913	hypothetical protein, conserved
TcCLB.511501.40	0.699315	1.62373	0.000310171	hypothetical protein, conserved
TcCLB.506701.20	0.698488	1.6228	0.140363	Tob55, putative
TcCLB.504109.60	0.698132	1.6224	1.57455e-08	hypothetical protein, conserved
TcCLB.510667.4	0.697992	1.62225	9.56091e-05	hypothetical protein, conserved (fragment)
TcCLB.508059.40	0.697857	1.62209	0.00010077	syntaxin, putative
TcCLB.509229.50	0.697254	1.62142	0.00229366	hypothetical protein
TcCLB.504797.34	0.697114	1.62126	3.26651e-06	N-acetyltransferase, putative
TcCLB.508883.20	0.696809	1.62092	0.0433842	hypothetical protein
TcCLB.507087.60	0.696788	1.62089	0.0289964	hypothetical protein, conserved
TcCLB.510579.10	0.696562	1.62064	2.24866e-05	tyrosine phospatase-like protein, putative
TcCLB.511481.10	0.696068	1.62008	0.0137497	hypothetical protein, conserved
TcCLB.510129.11	0.695529	1.61948	8.27067e-09	Surface membrane protein (fragment)
TcCLB.504185.9	0.695385	1.61932	0.00228745	hypothetical protein, conserved
TcCLB.509029.80	0.694306	1.61811	1.93673e-10	hypothetical protein
TcCLB.511895.40	0.694053	1.61782	0.000103558	hypothetical protein
TcCLB.505985.9	0.693914	1.61767	1.37715e-08	calpain cysteine peptidase, putative (fragment)
TcCLB.508303.44	0.693516	1.61722	0.000509893	hypothetical protein, conserved
TcCLB.472777.9	0.692768	1.61638	0.0180991	hypothetical protein, conserved
TcCLB.503919.40	0.692409	1.61598	9.86112e-08	hypothetical protein, conserved
TcCLB.507053.190	0.692404	1.61597	6.78866e-08	hypothetical protein, conserved
TcCLB.511235.10	0.692282	1.61584	0.0326572	hypothetical protein, conserved (pseudogene)
TcCLB.510901.180	0.692043	1.61557	0.00447922	hypothetical protein, conserved
TcCLB.510661.174	0.691789	1.61529	6.63568e-09	riboflavin kinase, putative
TcCLB.507945.10	0.691059	1.61447	1.39843e-12	ATP-dependent RNA helicase, putative
TcCLB.509561.60	0.690213	1.61352	7.47203e-05	hypothetical protein, conserved
TcCLB.510695.10	0.690094	1.61339	0.0488909	surface protease GP63 (pseudogene), putative
TcCLB.469735.9	0.689986	1.61327	8.58406e-06	hypothetical protein, conserved
TcCLB.507027.80	0.689603	1.61284	2.62572e-06	hypothetical protein, conserved
TcCLB.510625.225	0.68905	1.61222	0.16695	hypothetical protein, conserved (pseudogene)
TcCLB.511811.20	0.688957	1.61212	0.0296884	hypothetical protein, conserved
TcCLB.511717.20	0.688616	1.61174	2.26467e-07	hypothetical protein, conserved
TcCLB.507019.140	0.688426	1.61152	0.000257701	CDC16, putative
TcCLB.511491.90	0.688093	1.61115	5.41028e-06	hypothetical protein
TcCLB.511565.30	0.687563	1.61056	0.0164049	mucin TcMUCII, putative
TcCLB.510187.10	0.687124	1.61007	5.10528e-06	hypothetical protein, conserved
TcCLB.510729.280	0.686883	1.6098	0.00561467	trans-sialidase, Group III, putative
TcCLB.510941.20	0.685761	1.60855	1.80004e-05	hypothetical protein, conserved
TcCLB.504209.10	0.685012	1.60772	0.00140639	conserved protein, unknown function
TcCLB.503657.70	0.684828	1.60751	2.2315e-10	tyrosine phosphatase, putative
TcCLB.504177.30	0.684654	1.60732	2.2913e-06	hypothetical protein, conserved
TcCLB.506315.20	0.683636	1.60618	4.43697e-06	hypothetical protein, conserved
TcCLB.509109.170	0.683451	1.60598	0.000224426	tubulin tyrosine ligase (pseudogene), putative
TcCLB.509911.74	0.682745	1.60519	1.60966e-13	hypothetical protein, conserved
TcCLB.509733.70	0.682128	1.60451	1.66784e-08	hypothetical protein, conserved
TcCLB.511723.10	0.680622	1.60283	0.00031988	surface protease GP63, putative
TcCLB.506559.110	0.68044	1.60263	4.13164e-07	hypothetical protein
TcCLB.508621.10	0.680103	1.60225	0.00152052	protein kinase, putative
TcCLB.506337.30	0.679995	1.60213	0.000387846	Charged multivesicular body protein 3, putative
TcCLB.511391.100	0.679946	1.60208	0.0106977	hypothetical protein, conserved
TcCLB.507031.40	0.679884	1.60201	6.39967e-09	hypothetical protein, conserved
TcCLB.507005.50	0.679711	1.60182	2.77945e-07	hypothetical protein
TcCLB.504533.50	0.679625	1.60172	2.02103e-11	hypothetical protein, conserved
TcCLB.510329.120	0.678974	1.601	9.43035e-08	VIT family, putative
TcCLB.508501.280	0.678741	1.60074	1.12222e-05	hypothetical protein, conserved
TcCLB.510901.160	0.678623	1.60061	0.000742904	hypothetical protein, conserved
TcCLB.511763.10	0.67801	1.59993	7.13692e-06	hypothetical protein, conserved
TcCLB.508153.1070	0.677929	1.59984	1.5847e-07	hypothetical protein, conserved
TcCLB.509331.189	0.677808	1.59971	0.0735985	hypothetical protein, conserved
TcCLB.510823.30	0.677619	1.5995	5.08255e-05	Isoprenylcysteine alpha-carbonyl methylesterase, putative
TcCLB.508911.60	0.67759	1.59947	5.43317e-11	hypothetical protein, conserved
TcCLB.511277.110	0.67746	1.59932	0.00591058	citrate synthase, putative
TcCLB.506321.320	0.677335	1.59918	3.07636e-07	suppressive immunomodulating factor, putative
TcCLB.509259.40	0.677325	1.59917	0.0119685	surface protease GP63, putative
TcCLB.504131.120	0.677149	1.59898	1.86827e-06	hypothetical protein, conserved
TcCLB.452283.4	0.676923	1.59873	0.00476812	hypothetical protein, conserved
TcCLB.506315.80	0.676709	1.59849	1.49608e-09	hypothetical protein, conserved
TcCLB.511297.30	0.676688	1.59847	0.000238658	hypothetical protein, conserved (fragment)
TcCLB.510519.40	0.676487	1.59824	0.000143793	protein kinase, putative
TcCLB.511261.130	0.67644	1.59819	0.000702397	hypothetical protein, conserved
TcCLB.510445.10	0.676051	1.59776	0.00751345	casein kinase 1 isoform 2, putative
TcCLB.511261.100	0.675924	1.59762	0.000625355	chaperone DNAJ protein, putative
TcCLB.506679.200	0.675899	1.59759	2.70294e-06	hypothetical protein, conserved
TcCLB.510329.180	0.675728	1.5974	0.00749576	hypothetical protein, conserved
TcCLB.510519.100	0.67543	1.59707	0.0120913	hypothetical protein, conserved
TcCLB.507991.50	0.6752	1.59682	9.43858e-11	kinesin, putative
TcCLB.503573.9	0.675017	1.59662	1.28906e-05	ATP-binding cassette transporter ABCA1, putative
TcCLB.510901.220	0.674364	1.59589	3.78402e-07	Flagellum attachment zone protein 20
TcCLB.507967.4	0.674313	1.59584	0.0407683	hypothetical protein, conserved
TcCLB.506335.60	0.67427	1.59579	0.00967832	mucin TcMUCII (pseudogene), putative
TcCLB.508999.49	0.673836	1.59531	NA	hypothetical protein
TcCLB.508303.40	0.673361	1.59478	1.06113e-05	hypothetical protein, conserved
TcCLB.504197.5	0.672253	1.59356	0.214073	Mucin-associated surface protein (MASP) (fragment)
TcCLB.509989.10	0.672242	1.59355	0.091373	phosphatidylinositol 3-kinase, putative
TcCLB.511761.70	0.672175	1.59347	0.000525142	hypothetical protein, conserved
TcCLB.508693.150	0.67212	1.59341	0.234621	hypothetical protein, conserved
TcCLB.508015.10	0.671768	1.59302	0.00123293	hypothetical protein
TcCLB.509695.80	0.671345	1.59256	5.98967e-05	hypothetical protein, conserved
TcCLB.505207.10	0.671001	1.59218	0.00299733	trans-sialidase, Group VII, putative
TcCLB.504157.60	0.67097	1.59214	4.70901e-05	hypothetical protein, conserved
TcCLB.506559.360	0.670775	1.59193	5.13888e-07	hypothetical protein, conserved
TcCLB.508405.30	0.670674	1.59182	2.98211e-07	Suppressor of G2 allele of SKP1, putative
TcCLB.507623.120	0.670603	1.59174	1.84153e-07	hypothetical protein, conserved
TcCLB.507517.104	0.670053	1.59113	0.0264518	hypothetical protein, conserved
TcCLB.509647.160	0.669856	1.59091	2.77384e-05	SKP1-like protein
TcCLB.511277.310	0.669801	1.59085	1.045e-06	hypothetical protein, conserved
TcCLB.511277.500	0.669714	1.59076	1.94678e-05	hypothetical protein, conserved
TcCLB.508641.180	0.66806	1.58894	9.04508e-11	RNA-binding protein 38, putative
TcCLB.506559.170	0.667955	1.58882	3.73312e-09	8-oxoguanine DNA glycosylase, putative
TcCLB.506257.98	0.667768	1.58861	4.68809e-08	hypothetical protein, conserved (pseudogene)
TcCLB.508885.5	0.667188	1.58797	0.235068	Mucin-associated surface protein (MASP)
TcCLB.508119.30	0.666717	1.58746	0.177859	mucin TcMUCII, putative
TcCLB.511851.30	0.666351	1.58705	0.00794416	trans-sialidase (pseudogene), putative
TcCLB.509105.100	0.665964	1.58663	1.60339e-05	Enriched in surface-labeled proteome protein 15
TcCLB.508503.90	0.665889	1.58655	0.00136209	hypothetical protein, conserved
TcCLB.509733.185	0.665861	1.58652	0.0967099	hypothetical protein, conserved (pseudogene)
TcCLB.506871.20	0.66542	1.58603	4.2328e-08	hypothetical protein, conserved
TcCLB.509409.10	0.665032	1.5856	0.000558866	protein kinase, putative
TcCLB.509295.50	0.664362	1.58487	0.0036262	beta galactofuranosyl glycosyltransferase, putative
TcCLB.510693.200	0.664316	1.58482	5.69439e-07	mucin TcMUCII, putative
TcCLB.511837.110	0.664017	1.58449	1.46087e-09	hypothetical protein, conserved
TcCLB.508501.320	0.663716	1.58416	0.0921442	trans-sialidase, putative
TcCLB.509029.70	0.663659	1.58409	1.54846e-08	leucine-rich repeat protein, putative
TcCLB.405737.24	0.663656	1.58409	0.248423	hypothetical protein, conserved
TcCLB.508593.80	0.663567	1.58399	1.15323e-05	hypothetical protein, conserved
TcCLB.508153.610	0.663521	1.58394	0.0216377	Putative intraflagellar transport protein C3
TcCLB.509937.170	0.663388	1.5838	5.1212e-05	hypothetical protein
TcCLB.503775.41	0.662784	1.58313	0.245361	hypothetical protein, conserved (pseudogene)
TcCLB.509459.50	0.662739	1.58309	0.230044	hypothetical protein, conserved
TcCLB.507587.50	0.662078	1.58236	0.0624538	hypothetical protein
TcCLB.508029.30	0.661811	1.58207	1.12547e-06	ATP dependent DEAD-box helicase, putative
TcCLB.506279.10	0.661682	1.58193	6.33828e-08	trans-sialidase, Group VI, putative
TcCLB.511865.40	0.66163	1.58187	4.90508e-12	hypothetical protein, conserved
TcCLB.506575.30	0.661619	1.58186	6.57033e-08	hypothetical protein, conserved (pseudogene)
TcCLB.506509.60	0.661057	1.58124	1.7658e-05	hypothetical protein, conserved
TcCLB.507069.210	0.660904	1.58107	0.226949	hypothetical protein
TcCLB.506855.70	0.660638	1.58078	4.41485e-06	hypothetical protein, conserved
TcCLB.511301.120	0.660461	1.58059	2.23675e-08	hypothetical protein, conserved
TcCLB.510327.20	0.660091	1.58018	0.162866	surface protease GP63 (pseudogene), putative
TcCLB.507053.110	0.659577	1.57962	6.25919e-10	hypothetical protein, conserved
TcCLB.509569.160	0.659404	1.57943	1.92181e-07	hypothetical protein, conserved
TcCLB.507519.60	0.658768	1.57873	2.6076e-07	Silent information regulator 2 related protein 1
TcCLB.508231.210	0.658166	1.57807	2.67834e-07	hypothetical protein, conserved
TcCLB.507005.80	0.658088	1.57799	0.00440957	hypothetical protein, conserved
TcCLB.508443.50	0.657318	1.57715	0.0129835	hypothetical protein, conserved
TcCLB.509061.10	0.657057	1.57686	0.069948	surface protease GP63 (pseudogene), putative
TcCLB.508959.10	0.657006	1.57681	0.00198825	hypothetical protein, conserved
TcCLB.508815.50	0.656693	1.57647	3.66672e-08	hypothetical protein, conserved
TcCLB.511633.70	0.656415	1.57616	4.56337e-06	protein kinase, putative
TcCLB.510967.13	0.656211	1.57594	0.00348679	hypothetical protein, conserved
TcCLB.510481.90	0.655928	1.57563	0.0189762	hypothetical protein, conserved
TcCLB.511661.100	0.655091	1.57472	5.68272e-06	protein kinase, putative
TcCLB.508355.80	0.654964	1.57458	0.0621486	trans-sialidase, Group VIII, putative
TcCLB.508521.30	0.65474	1.57433	0.00188325	beta galactofuranosyl glycosyltransferase (pseudogene), putative
TcCLB.508799.30	0.654712	1.5743	4.67904e-05	hypothetical protein, conserved
TcCLB.508919.70	0.654123	1.57366	4.28272e-05	protein kinase, putative
TcCLB.510787.10	0.653985	1.57351	1.27541e-05	trans-sialidase, Group I, putative
TcCLB.510359.90	0.653765	1.57327	0.00137502	hypothetical protein, conserved
TcCLB.508543.129	0.653687	1.57318	0.000197182	hypothetical protein, conserved
TcCLB.506679.120	0.653319	1.57278	0.000171555	hypothetical protein
TcCLB.511277.560	0.653267	1.57273	0.000791883	synaptotagmin, putative
TcCLB.510667.140	0.652546	1.57194	0.00263826	ribulose-phosphate 3-epimerase, putative
TcCLB.510885.110	0.652336	1.57171	4.57331e-05	hypothetical protein, conserved
TcCLB.508153.510	0.652289	1.57166	7.9985e-05	serine/threonine-protein kinase Nek, putative
TcCLB.510943.198	0.651382	1.57067	1.14921e-05	hypothetical protein, conserved
TcCLB.508917.20	0.650904	1.57015	0.00044445	hypothetical protein, conserved
TcCLB.510519.30	0.650858	1.5701	2.97642e-05	mitochondrial structure specific endonuclease I (SSE-1), putative
TcCLB.509671.84	0.65081	1.57005	5.78817e-06	hypothetical protein, conserved
TcCLB.503939.10	0.649682	1.56882	0.000521565	acetyltransferase, putative
TcCLB.507031.140	0.649678	1.56882	3.59968e-07	hypothetical protein, conserved (pseudogene)
TcCLB.507065.70	0.649361	1.56847	4.2661e-05	mucin TcMUCII, putative
TcCLB.506593.50	0.649185	1.56828	6.34832e-05	hypothetical protein, conserved
TcCLB.509877.89	0.648838	1.56791	0.00490328	hypothetical protein, conserved
TcCLB.510329.350	0.648501	1.56754	1.84089e-05	hypothetical protein, conserved
TcCLB.511861.111	0.648443	1.56748	0.0458906	elongation factor 1-gamma (EF-1-gamma), putative
TcCLB.507005.40	0.647887	1.56687	0.000142958	zinc finger protein, putative
TcCLB.508879.70	0.647478	1.56643	2.05331e-05	hypothetical protein, conserved
TcCLB.511249.40	0.647414	1.56636	0.00177347	hypothetical protein, conserved
TcCLB.510681.20	0.646849	1.56574	0.00749192	myosin heavy chain kinase A, putative
TcCLB.406377.10	0.646578	1.56545	0.101698	hypothetical protein, conserved (pseudogene)
TcCLB.510421.90	0.646076	1.56491	1.91051e-05	protein kinase, putative
TcCLB.510305.40	0.645589	1.56438	0.000395942	hypothetical protein, conserved
TcCLB.508355.370	0.645403	1.56418	0.190135	hypothetical protein, conserved
TcCLB.509725.139	0.644942	1.56368	0.0906689	damage-specific DNA binding protein, putative
TcCLB.506145.20	0.644	1.56266	3.05539e-05	hypothetical protein, conserved
TcCLB.505071.140	0.643803	1.56244	7.36008e-06	protein kinase, putative
TcCLB.509791.60	0.643514	1.56213	1.43523e-05	Flagellum attachment zone protein 5
TcCLB.508479.280	0.643109	1.56169	0.00296605	hypothetical protein, conserved
TcCLB.511283.310	0.641871	1.56035	3.1411e-09	hypothetical protein, conserved
TcCLB.511817.270	0.639819	1.55813	2.75696e-06	hypothetical protein, conserved
TcCLB.511257.60	0.639517	1.55781	0.0899528	surface protease GP63, putative
TcCLB.508261.25	0.638963	1.55721	0.000660771	trans-sialidase (pseudogene), putative
TcCLB.507063.130	0.638886	1.55713	3.66344e-06	protein kinase, putative
TcCLB.511807.100	0.638809	1.55704	NA	hypothetical protein, conserved
TcCLB.511725.120	0.638707	1.55693	3.1285e-09	kinetoplast polyadenylation/uridylation factor 2, putative
TcCLB.505193.90	0.638582	1.5568	3.947e-05	hypothetical protein, conserved
TcCLB.509331.20	0.638456	1.55666	0.000548871	hypothetical protein, conserved
TcCLB.508737.40	0.637999	1.55617	4.96099e-05	hypothetical protein
TcCLB.509429.130	0.637466	1.55559	0.00041181	hypothetical protein, conserved
TcCLB.509911.130	0.637447	1.55557	3.01497e-08	Flagellum attachment zone protein 14
TcCLB.509747.60	0.637413	1.55554	3.81635e-07	hypothetical protein, conserved
TcCLB.507063.100	0.636907	1.55499	3.92451e-09	mitochondrial DNA polymerase beta-PAK, putative
TcCLB.507305.40	0.636507	1.55456	0.0537605	zinc finger CCCH domain containing protein 11
TcCLB.507951.154	0.636409	1.55445	0.00196053	cytochrome b5, putative
TcCLB.509693.209	0.635982	1.554	1.1189e-06	mismatch repair protein, putative
TcCLB.508479.230	0.635411	1.55338	8.4306e-08	peroxin-2, putative
TcCLB.510629.410	0.634651	1.55256	0.00253315	hypothetical protein, conserved
TcCLB.506511.60	0.634418	1.55231	4.27795e-08	flavoprotein monooxygenase, putative
TcCLB.509637.9	0.634056	1.55192	0.15135	hypothetical protein, conserved
TcCLB.508887.24	0.633926	1.55178	0.225351	Mucin-associated surface protein (MASP) (pseudogene)
TcCLB.511277.180	0.633396	1.55121	3.11687e-08	hypothetical protein, conserved
TcCLB.508891.40	0.633175	1.55097	1.88378e-06	hypothetical protein, conserved
TcCLB.511487.130	0.63304	1.55083	0.0317903	trans-sialidase (pseudogene), putative
TcCLB.504013.11	0.63274	1.55051	7.99848e-20	ribosomal protein L13, putative (fragment)
TcCLB.509911.40	0.632383	1.55012	2.53483e-06	hypothetical protein, conserved
TcCLB.509509.40	0.631838	1.54954	0.000609428	hypothetical protein, conserved
TcCLB.509253.40	0.631821	1.54952	1.35226e-05	hypothetical protein, conserved
TcCLB.508495.170	0.631814	1.54951	0.18038	mucin TcMUCII, putative
TcCLB.511239.159	0.630978	1.54861	0.0961868	inosine-guanine nucleoside hydrolase, putative
TcCLB.510687.50	0.630506	1.54811	1.36033e-08	hypothetical protein, conserved
TcCLB.507491.140	0.630227	1.54781	0.000204326	hypothetical protein, conserved
TcCLB.508899.80	0.630202	1.54778	3.49063e-06	hypothetical protein, conserved
TcCLB.511269.70	0.630044	1.54761	0.218388	cysteine peptidase, Clan CA, family C2, putative
TcCLB.510305.60	0.62996	1.54752	2.92795e-07	hypothetical protein, conserved
TcCLB.508221.910	0.629899	1.54746	0.128389	mucin TcMUCII, putative
TcCLB.510037.10	0.629437	1.54696	0.102905	Mucin-associated surface protein (MASP), subgroup S008
TcCLB.507895.80	0.629233	1.54674	1.43097e-07	hypothetical protein, conserved
TcCLB.508637.66	0.62897	1.54646	0.0012994	hypothetical protein, conserved
TcCLB.508505.30	0.628917	1.5464	3.40712e-07	hypothetical protein, conserved
TcCLB.508435.60	0.628041	1.54546	0.00151052	mucin TcMUCII, putative
TcCLB.509053.80	0.628032	1.54546	7.91531e-05	hypothetical protein, conserved
TcCLB.509611.40	0.627979	1.5454	0.00176735	hypothetical protein, conserved
TcCLB.503823.20	0.627966	1.54539	0.000476728	hypothetical protein, conserved
TcCLB.506611.70	0.627021	1.54437	2.73531e-06	surface protease GP63, putative
TcCLB.506583.20	0.626181	1.54347	0.0499112	hypothetical protein, conserved
TcCLB.503861.50	0.625866	1.54314	0.000544741	beta galactofuranosyl glycosyltransferase, putative
TcCLB.504741.4	0.6256	1.54285	0.00261775	hypothetical protein, conserved
TcCLB.510479.30	0.625324	1.54256	1.66948e-05	hypothetical protein
TcCLB.508881.110	0.625245	1.54247	0.00150881	GTP-binding protein, putative
TcCLB.510689.40	0.625017	1.54223	0.0541096	Phosphatidylinositol 3-kinase tor2
TcCLB.509997.60	0.624183	1.54134	8.59169e-13	hypothetical protein, conserved
TcCLB.508641.110	0.623539	1.54065	0.000356729	hypothetical protein, conserved
TcCLB.503521.20	0.623524	1.54063	0.000145248	hypothetical protein, conserved
TcCLB.504243.30	0.623193	1.54028	7.29117e-10	hypothetical protein, conserved
TcCLB.506009.50	0.623059	1.54014	1.81546e-05	hypothetical protein, conserved
TcCLB.511815.100	0.622954	1.54003	0.00353117	hypothetical protein, conserved
TcCLB.509429.170	0.622885	1.53995	0.000355703	hypothetical protein, conserved
TcCLB.511269.60	0.622715	1.53977	0.260116	Vacuolar protein sorting-associated protein 16 homolog, putative
TcCLB.508533.20	0.62243	1.53947	2.17306e-05	hypothetical protein, conserved
TcCLB.510569.10	0.621433	1.5384	0.000523429	trans-sialidase, putative
TcCLB.511507.70	0.621398	1.53837	5.13644e-05	calpain-like cysteine peptidase, putative
TcCLB.510303.70	0.621114	1.53806	6.07965e-07	hypothetical protein, conserved
TcCLB.510657.150	0.620899	1.53783	2.79864e-05	hypothetical protein
TcCLB.507515.110	0.620694	1.53761	0.000705062	hypothetical protein, conserved
TcCLB.509065.170	0.620246	1.53714	2.20978e-05	hypothetical protein, conserved
TcCLB.510733.40	0.619398	1.53623	4.19832e-05	hypothetical protein, conserved
TcCLB.509553.10	0.618824	1.53562	2.71493e-06	hypothetical protein, conserved
TcCLB.503723.90	0.618812	1.53561	0.28967	glyceraldehyde 3-phosphate dehydrogenase, C-terminal domain, putative
TcCLB.510903.20	0.617998	1.53474	9.81564e-05	hypothetical protein, conserved
TcCLB.507087.70	0.617965	1.53471	2.46803e-05	hypothetical protein, conserved
TcCLB.508999.134	0.617928	1.53467	0.289236	mucin TcMUCII, putative
TcCLB.511283.140	0.617539	1.53426	1.06381e-06	hypothetical protein, conserved
TcCLB.467465.10	0.617238	1.53394	0.290306	surface protease GP63, putative
TcCLB.504243.10	0.615897	1.53251	0.0019595	RNA-binding protein, putative
TcCLB.510187.500	0.615606	1.5322	0.180448	serine/threonine protein phosphatase 2B catalytic subunit A2, putative
TcCLB.503703.90	0.615538	1.53213	0.00018845	hypothetical protein, conserved
TcCLB.510187.360	0.615183	1.53175	2.68553e-08	hypothetical protein, conserved
TcCLB.511655.50	0.615024	1.53158	1.80388e-07	Inositol phosphosphingolipids phospholipase C (pseudogene)
TcCLB.508547.60	0.614634	1.53117	0.00118339	hypothetical protein, conserved
TcCLB.511643.50	0.614612	1.53115	1.77906e-07	Mucin-associated surface protein (MASP) (pseudogene)
TcCLB.506573.50	0.614228	1.53074	9.75371e-08	hypothetical protein, conserved
TcCLB.509027.24	0.614219	1.53073	0.00206464	hypothetical protein, conserved
TcCLB.504199.10	0.614172	1.53068	1.87111e-06	hypothetical protein, conserved
TcCLB.506435.90	0.614092	1.53059	0.000371293	hypothetical protein, conserved
TcCLB.511461.14	0.614023	1.53052	0.00739677	glyceraldehyde 3-phosphate dehydrogenase, putative
TcCLB.511909.10	0.613947	1.53044	1.36547e-09	hypothetical protein, conserved
TcCLB.509991.9	0.613183	1.52963	0.169686	protein kinase, putative
TcCLB.508045.60	0.612897	1.52933	3.6179e-05	hypothetical protein, conserved
TcCLB.503657.50	0.612438	1.52884	0.00359933	hypothetical protein, conserved
TcCLB.509051.60	0.612294	1.52869	0.133155	ubiquitin-protein ligase, putative (fragment)
TcCLB.506303.100	0.612036	1.52841	2.01058e-07	hypothetical protein, conserved
TcCLB.506219.10	0.611217	1.52755	6.39905e-05	hypothetical protein, conserved
TcCLB.511321.20	0.61121	1.52754	2.07833e-09	hypothetical protein, conserved
TcCLB.508153.590	0.610962	1.52728	2.81861e-08	hypothetical protein, conserved
TcCLB.506469.30	0.610938	1.52725	5.28238e-05	protein kinase, putative
TcCLB.410049.20	0.610632	1.52693	0.000328936	hypothetical protein, conserved
TcCLB.508909.300	0.610514	1.5268	2.71624e-06	hypothetical protein, conserved
TcCLB.509971.60	0.610236	1.52651	0.286881	surface protease GP63, putative
TcCLB.510001.20	0.610198	1.52647	4.59816e-08	hypothetical protein, conserved
TcCLB.511283.290	0.60976	1.52601	3.75067e-06	hypothetical protein, conserved
TcCLB.510045.30	0.60964	1.52588	1.85021e-06	protein kinase, putative
TcCLB.506789.200	0.609592	1.52583	7.59355e-06	ubiquitin-conjugating enzyme E2, putative
TcCLB.511209.40	0.609277	1.52549	0.00108305	hypothetical protein, conserved
TcCLB.508641.80	0.609167	1.52538	1.51357e-06	hypothetical protein, conserved
TcCLB.509569.80	0.608981	1.52518	0.00068344	hypothetical protein
TcCLB.507053.100	0.608358	1.52452	8.04796e-05	ubiquitin hydrolase, putative
TcCLB.510303.140	0.608319	1.52448	0.030518	surface protease GP63, putative
TcCLB.509027.70	0.608124	1.52428	8.25558e-06	kinetoplastid kinetochore protein 19, putative
TcCLB.507067.50	0.607808	1.52394	0.229439	mucin TcMUCII (pseudogene), putative
TcCLB.509005.81	0.60757	1.52369	0.274363	surface protease GP63 (pseudogene), putative
TcCLB.473709.10	0.607374	1.52348	0.0271563	trans-sialidase, putative (fragment)
TcCLB.510437.60	0.607306	1.52341	0.000271726	hypothetical protein, conserved
TcCLB.511383.10	0.607048	1.52314	0.0455869	hypothetical protein, conserved
TcCLB.508221.76	0.606992	1.52308	0.271254	hypothetical protein
TcCLB.508461.160	0.606271	1.52232	1.14761e-08	hypothetical protein, conserved
TcCLB.510359.590	0.605842	1.52187	NA	hypothetical protein
TcCLB.506445.30	0.605683	1.5217	1.99938e-09	cation transporter, putative
TcCLB.504131.130	0.605555	1.52156	0.000340415	hypothetical protein, conserved
TcCLB.507681.180	0.605465	1.52147	5.67604e-10	hypothetical protein, conserved
TcCLB.506883.34	0.605165	1.52115	0.000513053	hypothetical protein, conserved
TcCLB.511237.130	0.604931	1.52091	0.0004395	trans-sialidase, putative (fragment)
TcCLB.508979.71	0.604848	1.52082	0.303229	glyceraldehyde 3-phosphate dehydrogenase (pseudogene), putative
TcCLB.504085.10	0.604632	1.52059	1.35193e-06	hypothetical protein, conserved
TcCLB.511727.30	0.604542	1.5205	9.34631e-10	hypothetical protein, conserved
TcCLB.508461.300	0.604241	1.52018	1.39812e-05	hypothetical protein, conserved
TcCLB.503781.60	0.604105	1.52004	1.45673e-06	tRNA pseudouridine synthase A, putative
TcCLB.509605.10	0.603855	1.51977	0.000805442	malonyl-CoA decarboxylase, mitochondrial precursor, putative
TcCLB.511727.14	0.60349	1.51939	NA	hypothetical protein, conserved (fragment)
TcCLB.511903.10	0.603393	1.51929	0.00695522	hypothetical protein
TcCLB.508865.30	0.603365	1.51926	5.32922e-12	immunodominant antigen, putative
TcCLB.511461.4	0.603198	1.51908	0.026597	hypothetical protein, conserved (fragment)
TcCLB.508153.1130	0.603015	1.51889	0.000146383	hypothetical protein
TcCLB.510203.34	0.602854	1.51872	0.192572	Mucin-associated surface protein (MASP) (pseudogene)
TcCLB.510713.50	0.602331	1.51817	0.120596	beta galactofuranosyl glycosyltransferase (pseudogene), putative
TcCLB.508547.100	0.602088	1.51791	1.41406e-05	hypothetical protein, conserved
TcCLB.508815.130	0.602023	1.51784	4.9988e-07	hypothetical protein, conserved
TcCLB.509495.30	0.600681	1.51643	0.000455661	trans-sialidase, Group I, putative
TcCLB.506327.90	0.600495	1.51624	1.1938e-06	serine/threonine protein kinase, putative
TcCLB.509733.180	0.600207	1.51593	0.000129593	adenylate kinase, putative
TcCLB.508355.340	0.599983	1.5157	0.0118017	hypothetical protein, conserved
TcCLB.509213.90	0.599661	1.51536	0.00105123	hypothetical protein, conserved
TcCLB.506469.90	0.5987	1.51435	0.245126	hypothetical protein, conserved
TcCLB.508669.21	0.59815	1.51377	0.0142532	hypothetical protein
TcCLB.511167.50	0.59814	1.51376	5.11655e-08	hypothetical protein, conserved
TcCLB.503781.50	0.597762	1.51337	7.43257e-05	hypothetical protein, conserved
TcCLB.504013.70	0.597631	1.51323	4.95006e-06	Carboxypeptidase-like protein
TcCLB.511773.40	0.596388	1.51193	0.137684	hypothetical protein, conserved
TcCLB.506975.66	0.596194	1.51172	0.0078725	hypothetical protein, conserved
TcCLB.511909.70	0.596183	1.51171	2.86234e-07	hypothetical protein, conserved
TcCLB.504207.29	0.596077	1.5116	0.0157522	hypothetical protein, conserved
TcCLB.510729.20	0.596051	1.51157	0.000143793	hypothetical protein, conserved
TcCLB.424937.20	0.595968	1.51149	NA	glucose transporter, putative (fragment)
TcCLB.504045.5	0.59463	1.51009	0.0200052	General negative regulator of transcription subunit 5
TcCLB.510915.10	0.594307	1.50975	0.0734869	Mucin-associated surface protein (MASP), subgroup S008
TcCLB.506303.171	0.594305	1.50975	0.311724	hypothetical protein, conserved
TcCLB.506789.160	0.593197	1.50859	1.63953e-08	hypothetical protein, conserved
TcCLB.508897.50	0.592743	1.50811	2.68531e-05	hypothetical protein, conserved
TcCLB.508303.30	0.592276	1.50762	0.000495175	hypothetical protein, conserved
TcCLB.511279.20	0.591984	1.50732	1.37258e-06	hypothetical protein, conserved
TcCLB.508175.260	0.591379	1.50669	1.28006e-07	inorganic polyphosphate/ATP-NAD kinase, putative
TcCLB.507787.150	0.590749	1.50603	8.57019e-14	hypothetical protein, conserved
TcCLB.507787.130	0.590401	1.50566	0.000172528	hypothetical protein, conserved
TcCLB.510385.20	0.589876	1.50512	0.256436	hypothetical protein
TcCLB.510039.100	0.589134	1.50434	0.00110904	hypothetical protein, conserved
TcCLB.504131.10	0.589014	1.50422	8.21189e-05	hypothetical protein, conserved (pseudogene)
TcCLB.404845.10	0.588897	1.5041	0.00332342	trans-sialidase (pseudogene), putative
TcCLB.414243.29	0.588849	1.50405	0.164417	inosine-guanine nucleoside hydrolase, putative (fragment)
TcCLB.503541.10	0.588775	1.50397	6.88975e-05	hypothetical protein, conserved
TcCLB.506425.30	0.58876	1.50395	0.000214738	hypothetical protein, conserved
TcCLB.511897.19	0.588626	1.50381	0.0106977	zinc-finger multi-pass transmembrane protein, putative
TcCLB.503889.10	0.588228	1.5034	0.209209	mucin TcMUCII, putative
TcCLB.511897.10	0.588122	1.50329	0.0101874	TFIIH basal transcription factor complex helicase subunit, putative
TcCLB.507071.151	0.588071	1.50324	0.112971	surface protease GP63 (pseudogene), putative
TcCLB.509723.20	0.587882	1.50304	0.125463	glycine dehydrogenase (pseudogene), putative
TcCLB.510679.70	0.587667	1.50281	2.07641e-05	lipase, putative
TcCLB.506247.80	0.587646	1.50279	1.55964e-05	Bromodomain factor 1
TcCLB.506475.130	0.587479	1.50262	5.48448e-07	hypothetical protein, conserved
TcCLB.506727.110	0.587319	1.50245	8.52478e-07	hypothetical protein, conserved
TcCLB.458759.20	0.587234	1.50236	0.256362	hypothetical protein, conserved
TcCLB.510087.40	0.587126	1.50225	0.0702813	hypothetical protein
TcCLB.506475.14	0.586863	1.50198	0.191873	phosphatidylinositol 3-kinase, putative
TcCLB.508737.130	0.58676	1.50187	0.00445975	hypothetical protein, conserved
TcCLB.503521.80	0.586598	1.5017	1.35239e-06	hypothetical protein, conserved
TcCLB.511153.70	0.586428	1.50152	6.16397e-06	hypothetical protein, conserved
TcCLB.506999.140	0.586296	1.50139	1.71863e-07	hypothetical protein, conserved
TcCLB.508365.280	0.585794	1.50086	0.181919	mucin TcMUCII, putative
TcCLB.509643.120	0.58574	1.50081	0.000440621	hypothetical protein, conserved
TcCLB.511661.10	0.585424	1.50048	7.29405e-06	hypothetical protein, conserved
TcCLB.506577.80	0.585361	1.50041	0.0434799	trans-sialidase, Group VIII, putative
TcCLB.503797.4	0.58532	1.50037	0.000212687	hypothetical protein, conserved
TcCLB.511277.483	0.584594	1.49962	0.00213127	hypothetical protein, conserved
TcCLB.510625.120	0.584383	1.4994	0.312547	hypothetical protein
TcCLB.509353.20	0.584174	1.49918	2.94252e-06	ERV/ALR sulfhydryl oxidase domain-containing protein
TcCLB.509053.100	0.583439	1.49842	0.000243531	protein kinase, putative
TcCLB.483183.10	0.58338	1.49836	0.0303126	trans-sialidase, putative (fragment)
TcCLB.509053.170	0.583187	1.49816	1.15298e-10	DREV methyltransferase, putative
TcCLB.510623.10	0.582644	1.49759	0.123595	mucin TcMUCII, putative
TcCLB.511725.30	0.582537	1.49748	1.06113e-05	hypothetical protein, conserved
TcCLB.511391.140	0.582347	1.49728	4.43114e-06	alpha-adaptin-like, putative
TcCLB.510567.10	0.581995	1.49692	0.00234278	trans-sialidase, putative (fragment)
TcCLB.511267.40	0.581495	1.4964	0.29172	hypothetical protein, conserved
TcCLB.511283.40	0.581178	1.49607	0.000365138	syntaxin 5, putative
TcCLB.508897.40	0.580447	1.49531	2.90644e-09	hypothetical protein, conserved
TcCLB.511809.50	0.580317	1.49518	0.000191489	hypothetical protein, conserved
TcCLB.510131.70	0.580196	1.49505	0.000109781	DNA polymerase kappa, putative
TcCLB.511717.10	0.579814	1.49466	0.0942003	hypothetical protein, conserved (pseudogene)
TcCLB.508461.240	0.579662	1.4945	9.24467e-06	chaperone protein DNAJ, putatative
TcCLB.506319.60	0.578526	1.49332	4.51384e-05	hypothetical protein, conserved
TcCLB.507031.60	0.578363	1.49315	0.000119315	nuclear cap binding complex subunit CBP30, putative
TcCLB.510661.70	0.578131	1.49291	5.02818e-06	hypothetical protein, conserved
TcCLB.504093.4	0.577068	1.49181	0.141859	hypothetical protein, conserved
TcCLB.507017.20	0.577002	1.49175	1.69242e-05	Leucine-rich repeat, ribonuclease inhibitor subtype domain-containing protein
TcCLB.511771.185	0.576972	1.49171	0.281593	hypothetical protein
TcCLB.507715.90	0.576488	1.49122	0.000123079	hypothetical protein, conserved
TcCLB.506955.32	0.576176	1.49089	0.316362	surface protease GP63 (pseudogene), putative
TcCLB.508659.40	0.576164	1.49088	0.00285622	protein phosphatase 2C-like (pseudogene), putative
TcCLB.509799.70	0.576078	1.49079	5.21164e-05	hypothetical protein, conserved
TcCLB.509429.124	0.575954	1.49066	0.0457168	hypothetical protein, conserved
TcCLB.511511.30	0.57573	1.49043	1.43169e-05	hypothetical protein, conserved
TcCLB.508199.80	0.575602	1.4903	4.4442e-05	EF hand, putative
TcCLB.508273.50	0.57541	1.4901	1.81689e-05	hypothetical protein, conserved
TcCLB.510657.200	0.575384	1.49007	0.00869295	surface protease GP63, putative
TcCLB.509791.170	0.574491	1.48915	0.000374713	small GTPase, putative
TcCLB.509163.54	0.574135	1.48878	0.180003	zinc finger protein, putative
TcCLB.504003.30	0.573886	1.48853	3.26958e-05	hypothetical protein
TcCLB.460747.9	0.573644	1.48828	5.17295e-05	hypothetical protein, conserved (fragment)
TcCLB.509695.70	0.573643	1.48828	7.80995e-05	hypothetical protein, conserved
TcCLB.507715.30	0.573496	1.48813	0.000571076	transcription elongation factor-like protein, putative
TcCLB.510355.210	0.573386	1.48801	0.235717	hypothetical protein, conserved
TcCLB.506611.20	0.573246	1.48787	0.208378	mucin TcMUCII, putative
TcCLB.508637.114	0.572947	1.48756	0.00725425	histone deacetylase 1, putative
TcCLB.508257.220	0.57271	1.48732	4.99164e-09	expression site-associated gene (ESAG-like) protein, putative
TcCLB.510483.240	0.572128	1.48671	0.135843	Mucin-associated surface protein (MASP) (pseudogene)
TcCLB.511255.640	0.571222	1.48578	0.331934	mucin TcMUCII, putative
TcCLB.507849.10	0.571121	1.48568	0.000437118	trans-sialidase (pseudogene), putative
TcCLB.511239.70	0.571102	1.48566	8.67016e-05	hypothetical protein, conserved
TcCLB.508409.329	0.5709	1.48545	2.10841e-05	hypothetical protein, conserved
TcCLB.509023.120	0.57052	1.48506	4.61737e-05	cysteine peptidase, Clan CA, family C19, putative
TcCLB.509911.80	0.570409	1.48494	0.000888779	hypothetical protein, conserved
TcCLB.506145.24	0.57024	1.48477	0.00356661	hypothetical protein, conserved
TcCLB.508501.260	0.570019	1.48454	0.00223828	hypothetical protein, conserved
TcCLB.511657.50	0.569876	1.4844	0.112266	hypothetical protein, conserved
TcCLB.504081.530	0.569659	1.48417	0.000297319	Mucin-associated surface protein (MASP), subgroup S032
TcCLB.510239.30	0.569604	1.48412	0.0623777	hypothetical protein, conserved (pseudogene)
TcCLB.504081.30	0.569528	1.48404	0.0134166	trans-sialidase (pseudogene), putative
TcCLB.507991.110	0.569125	1.48362	0.000907187	hypothetical protein, conserved
TcCLB.506321.120	0.568427	1.48291	0.322368	Mucin-associated surface protein (MASP), subgroup S083
TcCLB.511807.270	0.568269	1.48274	4.5483e-08	hypothetical protein, conserved
TcCLB.510653.19	0.56735	1.4818	0.00395962	hypothetical protein, conserved (fragment)
TcCLB.508873.210	0.567263	1.48171	0.340423	Mucin-associated surface protein (MASP), subgroup S105
TcCLB.510359.520	0.567044	1.48149	0.276735	Mucin-associated surface protein (MASP), subgroup S103
TcCLB.509637.36	0.565843	1.48025	0.00418202	Surface membrane protein (fragment)
TcCLB.510799.70	0.565173	1.47957	3.11757e-05	hypothetical protein, conserved
TcCLB.508521.90	0.564406	1.47878	0.066793	trans-sialidase (pseudogene), putative
TcCLB.505999.189	0.563974	1.47834	0.012833	hypothetical protein, conserved (pseudogene)
TcCLB.503395.59	0.563781	1.47814	0.132063	hypothetical protein, conserved (fragment)
TcCLB.509525.20	0.563726	1.47808	0.000108122	trans-sialidase (pseudogene), putative
TcCLB.510627.110	0.563405	1.47775	0.287167	Mucin-associated surface protein (MASP), subgroup S097
TcCLB.504021.149	0.563331	1.47768	0.0066287	hypothetical protein, conserved (fragment)
TcCLB.508641.140	0.561852	1.47616	0.00250896	hypothetical protein, conserved
TcCLB.504015.30	0.561502	1.4758	7.3631e-07	surface protease GP63, putative
TcCLB.507049.199	0.56114	1.47543	0.140665	pumilio protein, putative
TcCLB.509643.10	0.560915	1.4752	0.097153	hypothetical protein, conserved
TcCLB.510693.320	0.560742	1.47503	0.34686	Mucin-associated surface protein (MASP), subgroup S010
TcCLB.511285.70	0.560388	1.47467	2.18013e-09	hypothetical protein, conserved
TcCLB.506781.19	0.560233	1.47451	0.112803	Mucin-associated surface protein (MASP), subgroup S097
TcCLB.508433.145	0.560084	1.47436	0.0490928	mucin TcMUCII (pseudogene), putative
TcCLB.507659.30	0.560068	1.47434	1.94791e-12	amino acid transporter, putative (fragment)
TcCLB.509601.10	0.559883	1.47415	0.000185291	neutral sphingomyelinase activation associated factor-like protein
TcCLB.508503.30	0.559881	1.47415	0.0127872	hypothetical protein
TcCLB.508273.30	0.559776	1.47404	0.000210366	hypothetical protein, conserved
TcCLB.510889.30	0.55914	1.47339	0.00029214	kinase, putative
TcCLB.507053.60	0.558741	1.47298	1.81689e-05	hypothetical protein, conserved
TcCLB.509229.90	0.558719	1.47296	6.40631e-05	hypothetical protein, conserved
TcCLB.508231.70	0.558673	1.47291	0.00754456	hypothetical protein, conserved
TcCLB.506041.50	0.558567	1.47281	7.68382e-06	cytochrome c oxidase assembly protein, putative
TcCLB.509795.70	0.558555	1.47279	1.23432e-05	hypothetical protein, conserved
TcCLB.509605.30	0.557998	1.47222	NA	Protein kinase domain, putative
TcCLB.506621.70	0.557807	1.47203	0.000184936	hypothetical protein, conserved
TcCLB.510361.110	0.557613	1.47183	0.257522	Mucin-associated surface protein (MASP), subgroup S013
TcCLB.509663.47	0.557448	1.47166	0.180172	trans-sialidase (pseudogene), putative
TcCLB.510571.20	0.55724	1.47145	0.143032	leucine-rich repeat protein 1 (LRRP1), putative
TcCLB.511257.100	0.556677	1.47088	0.0208228	surface protease GP63, putative
TcCLB.510661.120	0.556473	1.47067	0.000176522	hypothetical protein, conserved
TcCLB.506435.140	0.556392	1.47059	0.000161794	hypothetical protein, conserved
TcCLB.508909.170	0.555822	1.47001	0.0122294	hypothetical protein, conserved
TcCLB.507801.140	0.55575	1.46993	0.223498	TPR-repeat protein, putative
TcCLB.508815.40	0.555122	1.46929	0.000892037	hypothetical protein, conserved
TcCLB.511847.80	0.55511	1.46928	1.07714e-05	hypothetical protein, conserved
TcCLB.509797.30	0.554846	1.46901	0.00394039	hypothetical protein, conserved
TcCLB.506145.50	0.554558	1.46872	0.146333	hypothetical protein, conserved
TcCLB.507017.80	0.554355	1.46851	0.0118376	hypothetical protein
TcCLB.508495.80	0.554198	1.46835	0.246477	Mucin-associated surface protein (MASP) (pseudogene)
TcCLB.506681.10	0.554121	1.46827	0.332373	RNA-binding protein, putative
TcCLB.511817.310	0.554025	1.46818	3.53852e-06	hypothetical protein, conserved
TcCLB.508523.80	0.553952	1.4681	0.00193907	cAMP response protein 1
TcCLB.507765.40	0.553896	1.46804	7.05758e-05	hypothetical protein, conserved
TcCLB.511517.44	0.553804	1.46795	0.000279973	chaperone DNAJ protein, putative
TcCLB.506989.10	0.553406	1.46755	1.88128e-06	hypothetical protein, conserved
TcCLB.510627.215	0.553405	1.46755	0.355393	hypothetical protein, conserved (pseudogene)
TcCLB.510519.120	0.552844	1.46697	0.000420259	hypothetical protein, conserved
TcCLB.511665.110	0.552795	1.46693	0.000343609	glycine dehydrogenase [decarboxylating] (pseudogene), putative
TcCLB.506459.200	0.552668	1.4668	0.353127	hypothetical protein
TcCLB.510699.50	0.552319	1.46644	0.000224426	mucin TcMUCII, putative
TcCLB.511367.170	0.552253	1.46637	1.14759e-08	vacuolar protein sorting-associated protein 35, putative
TcCLB.510329.310	0.552216	1.46634	0.000523429	hypothetical protein, conserved
TcCLB.506439.9	0.551813	1.46593	0.00198076	myosin heavy chain, putative
TcCLB.511643.73	0.551327	1.46543	1.69633e-05	Mucin-associated surface protein (MASP) (pseudogene)
TcCLB.510693.50	0.551239	1.46534	0.0773329	trans-sialidase (pseudogene), putative
TcCLB.507659.20	0.551206	1.46531	7.6103e-15	amino acid transporter, putative
TcCLB.508461.400	0.551045	1.46515	0.194108	nucleoside diphosphate kinase
TcCLB.508245.21	0.549743	1.46382	0.354685	surface protease GP63 (pseudogene), putative
TcCLB.509647.180	0.549481	1.46356	5.57506e-07	nicotinate phosphoribosyltransferase, putative
TcCLB.510655.10	0.549347	1.46342	0.00801573	hypothetical protein, conserved
TcCLB.505267.30	0.549121	1.46319	0.0574784	beta galactofuranosyl glycosyltransferase, putative
TcCLB.509695.30	0.549112	1.46318	0.00041843	hypothetical protein, conserved
TcCLB.508273.120	0.549042	1.46311	0.0039082	mucin TcMUCI, putative
TcCLB.509027.50	0.548975	1.46305	0.0042372	hypothetical protein, conserved
TcCLB.511461.60	0.548972	1.46304	2.57332e-10	NADH-dependent fumarate reductase (pseudogene), putative
TcCLB.511671.30	0.548872	1.46294	0.0120022	beta galactofuranosyl glycosyltransferase, putative
TcCLB.508875.10	0.548699	1.46277	0.328538	hypothetical protein (fragment)
TcCLB.511835.10	0.548628	1.46269	0.0211859	trans-sialidase, Group VIII, putative
TcCLB.506913.20	0.547544	1.4616	0.048378	protein kinase, putative (fragment)
TcCLB.510829.10	0.547468	1.46152	0.00258729	hypothetical protein, conserved
TcCLB.503465.10	0.547309	1.46136	0.00021918	hypothetical protein, conserved
TcCLB.506871.10	0.547193	1.46124	0.000758147	hypothetical protein, conserved
TcCLB.511633.79	0.547094	1.46114	7.90445e-07	microtubule-associated protein, putative
TcCLB.507825.49	0.546892	1.46093	0.0259395	Cyclin 12, L-type
TcCLB.511167.10	0.546435	1.46047	0.00219745	NADH-cytochrome b5 reductase, putative
TcCLB.511479.30	0.546274	1.46031	0.0126365	hypothetical protein, conserved
TcCLB.510329.280	0.546257	1.46029	1.33217e-06	protein farnesyltransferase alpha subunit, putative
TcCLB.506279.179	0.546115	1.46015	0.21533	hypothetical protein
TcCLB.506619.90	0.546018	1.46005	0.00343131	ABC transporter family-like protein
TcCLB.508153.520	0.546013	1.46004	0.00288819	hypothetical protein, conserved (pseudogene)
TcCLB.508739.11	0.545962	1.45999	0.0906736	trans-sialidase (pseudogene), putative
TcCLB.511015.10	0.545778	1.45981	4.75998e-05	mannosyl-oligosaccharide glucosidase, putative
TcCLB.507775.30	0.545751	1.45978	0.000461302	hypothetical protein, conserved
TcCLB.506435.30	0.545608	1.45964	3.49009e-05	mitochondrial DNA polymerase I protein A, putative
TcCLB.506419.30	0.545494	1.45952	0.000264972	hypothetical protein, conserved
TcCLB.509331.100	0.545085	1.45911	6.76569e-05	hypothetical protein, conserved
TcCLB.508503.40	0.544677	1.45869	0.0109843	hypothetical protein, conserved
TcCLB.507019.10	0.544585	1.4586	0.00200545	protein kinase, putative
TcCLB.511649.90	0.544478	1.45849	0.00414365	hypothetical protein, conserved
TcCLB.508153.190	0.54436	1.45837	0.000177449	kinesin, putative
TcCLB.511153.19	0.543856	1.45786	0.321064	surface protease GP63, putative
TcCLB.508479.360	0.54382	1.45783	0.0868861	hypothetical protein, conserved
TcCLB.507823.30	0.543658	1.45766	1.35239e-06	hypothetical protein, conserved
TcCLB.509053.30	0.543503	1.45751	2.59163e-08	hypothetical protein, conserved
TcCLB.511893.20	0.543401	1.4574	0.101865	hypothetical protein, conserved
TcCLB.504105.200	0.543184	1.45719	1.68487e-08	hypothetical protein, conserved
TcCLB.506727.70	0.543096	1.4571	0.00221754	hypothetical protein, conserved
TcCLB.507623.50	0.542978	1.45698	0.00163865	oxidoreductase, putative
TcCLB.508859.70	0.542569	1.45656	0.000457892	hypothetical protein, conserved
TcCLB.503825.10	0.542311	1.4563	0.140253	protein kinase (pseudogene), putative
TcCLB.508015.50	0.542002	1.45599	0.000208869	hypothetical protein, conserved
TcCLB.511517.60	0.54161	1.4556	1.06195e-05	C-1-tetrahydrofolate synthase, cytoplasmic, putative
TcCLB.509259.140	0.54116	1.45514	0.000668073	glycine dehydrogenase [decarboxylating] (pseudogene), putative
TcCLB.509429.140	0.540934	1.45491	0.000122426	kinetoplastid kinetochore protein 6, putative
TcCLB.510725.60	0.540734	1.45471	0.0298791	hypothetical protein, conserved
TcCLB.503733.20	0.540707	1.45469	0.000231755	6-phosphofructo-2-kinase/fructose-2,6-biphosphatase, putative
TcCLB.511809.110	0.540263	1.45424	0.257582	hypothetical protein, conserved
TcCLB.510885.140	0.540261	1.45424	0.00179165	hypothetical protein
TcCLB.508505.40	0.540204	1.45418	0.0427588	hypothetical protein, conserved
TcCLB.508153.560	0.540108	1.45408	0.00119178	hypothetical protein, conserved
TcCLB.509657.40	0.539605	1.45357	0.288743	mucin TcMUCII, putative
TcCLB.510943.150	0.539438	1.45341	4.03055e-05	glycerol-3-phosphate acyltransferase, putative
TcCLB.506681.20	0.539411	1.45338	7.85056e-05	hypothetical protein, conserved
TcCLB.503581.20	0.539119	1.45308	0.00108804	peptidyl-prolyl cis-trans isomerase, putative
TcCLB.508175.340	0.538597	1.45256	0.0110819	hypothetical protein, conserved
TcCLB.504157.70	0.538481	1.45244	0.00118684	hypothetical protein, conserved
TcCLB.508999.150	0.538287	1.45225	0.238943	Mucin-associated surface protein (MASP), subgroup S016
TcCLB.507049.110	0.537982	1.45194	0.011055	hypothetical protein, conserved
TcCLB.506725.10	0.537856	1.45181	0.000270798	hypothetical protein, conserved
TcCLB.508677.40	0.537778	1.45173	0.138177	trans-sialidase, Group VIII, putative
TcCLB.511293.50	0.537609	1.45156	0.018769	Flagellum attachment zone protein 7
TcCLB.511671.110	0.536662	1.45061	0.00543033	hypothetical protein, conserved
TcCLB.511771.30	0.536405	1.45035	0.143284	beta galactofuranosyl glycosyltransferase (pseudogene), putative
TcCLB.508739.40	0.536335	1.45028	3.42683e-08	hypothetical protein, conserved
TcCLB.508593.140	0.535912	1.44986	2.63464e-05	hypothetical protein, conserved
TcCLB.506549.9	0.535575	1.44952	1.01681e-08	dispersed gene family protein 1 (DGF-1), putative (fragment)
TcCLB.508857.40	0.535527	1.44947	0.0317406	UDP-glucoronosyl and UDP-glucosyl transferase, putative
TcCLB.509791.30	0.535522	1.44947	0.0041818	hypothetical protein, conserved
TcCLB.508153.120	0.53542	1.44936	7.5482e-07	ubiquitin carboxyl-terminal hydrolase, putative
TcCLB.511483.30	0.535036	1.44898	0.00981635	hypothetical protein, conserved
TcCLB.510791.11	0.535005	1.44895	0.354755	hypothetical protein
TcCLB.510187.40	0.534954	1.4489	3.47962e-13	tyrosine aminotransferase
TcCLB.511269.40	0.534768	1.44871	0.00346756	cAMP phosphodiesterase A, putative
TcCLB.509287.130	0.534707	1.44865	0.093625	surface protease GP63 (pseudogene), putative
TcCLB.427743.9	0.534661	1.4486	0.00768946	translation initiation factor eIF2B delta subunit, putative (fragment)
TcCLB.503973.290	0.533955	1.44789	0.274382	mucin TcMUCII, putative
TcCLB.511861.20	0.533607	1.44754	0.000228343	trans-sialidase, Group V, putative
TcCLB.511825.30	0.53337	1.44731	0.00519298	hypothetical protein, conserved
TcCLB.506613.9	0.532973	1.44691	0.000442758	surface protease GP63, putative (fragment)
TcCLB.510041.20	0.532834	1.44677	0.147931	zinc carboxypeptidase, putative
TcCLB.508199.70	0.532643	1.44658	0.000321218	hypothetical protein
TcCLB.507023.130	0.532642	1.44658	0.0061867	hypothetical protein, conserved
TcCLB.471901.5	0.532628	1.44656	0.24676	GDP-mannose 4,6 dehydratase, putative (fragment)
TcCLB.507023.90	0.53218	1.44611	2.11411e-05	hypothetical protein, conserved
TcCLB.508461.200	0.531906	1.44584	0.000362644	hypothetical protein, conserved
TcCLB.507793.10	0.531622	1.44555	0.00092044	hypothetical protein, conserved
TcCLB.510571.5	0.531327	1.44526	NA	retrotransposon hot spot protein (RHS), putative
TcCLB.511511.70	0.530986	1.44492	2.12653e-05	hypothetical protein, conserved
TcCLB.506595.60	0.530947	1.44488	0.00470882	beta galactofuranosyl glycosyltransferase (pseudogene), putative
TcCLB.508965.30	0.530765	1.4447	0.000538652	hypothetical protein
TcCLB.509317.10	0.530507	1.44444	0.00035556	hypothetical protein, conserved
TcCLB.508219.80	0.530472	1.4444	NA	hypothetical protein
TcCLB.508593.44	0.53044	1.44437	0.000467713	Alpha/beta hydrolase domain-containing protein
TcCLB.510627.169	0.530424	1.44435	0.373351	mucin TcMUC (pseudogene), putative
TcCLB.511461.20	0.530356	1.44429	9.26333e-14	tyrosine aminotransferase
TcCLB.503733.10	0.530334	1.44426	0.000406255	hypothetical protein, conserved
TcCLB.503939.40	0.529683	1.44361	1.76842e-09	hypothetical protein, conserved
TcCLB.509525.210	0.52936	1.44329	0.206597	hypothetical protein
TcCLB.509799.50	0.529009	1.44294	3.02092e-06	hypothetical protein, conserved
TcCLB.511461.10	0.528879	1.44281	0.0164745	hypothetical protein, conserved
TcCLB.503583.30	0.528652	1.44258	0.000517156	hypothetical protein, conserved
TcCLB.509115.50	0.528596	1.44252	0.026189	mucin-like glycoprotein, putative
TcCLB.503733.5	0.528489	1.44242	0.289057	hypothetical protein
TcCLB.506791.20	0.528398	1.44233	0.000614077	hypothetical protein, conserved
TcCLB.508175.189	0.528205	1.44213	0.0337855	hypothetical protein, conserved
TcCLB.506435.300	0.528035	1.44196	0.00222238	ubiquitin-conjugating enzyme E2, putative
TcCLB.506001.50	0.527583	1.44151	0.107851	Mucin-associated surface protein (MASP), subgroup S008
TcCLB.506791.60	0.527414	1.44134	8.70445e-06	hypothetical protein, conserved
TcCLB.510699.20	0.527326	1.44126	0.261154	Mucin-associated surface protein (MASP) (pseudogene)
TcCLB.508879.90	0.527191	1.44112	0.000500373	hypothetical protein, conserved
TcCLB.508799.270	0.52717	1.4411	4.97291e-09	protein associated with differentiation 4, putative
TcCLB.509577.9	0.52698	1.44091	0.0382586	hypothetical protein, conserved (fragment)
TcCLB.507517.10	0.526877	1.44081	1.69633e-05	hypothetical protein, conserved
TcCLB.508963.30	0.526781	1.44071	0.00916848	trans-sialidase, Group VIII, putative
TcCLB.508873.40	0.526498	1.44043	0.110471	mucin TcMUCII (pseudogene), putative
TcCLB.506905.4	0.526067	1.44	0.132063	proliferator-activated receptor-interacting protein (PRIP) interacting protein (PIMT), putative (fragment)
TcCLB.509945.10	0.525918	1.43985	1.8949e-05	ERAD-associated E3 ubiquitin-protein ligase HRD1, putative
TcCLB.508061.154	0.52575	1.43968	0.0108423	trans-sialidase, putative (fragment)
TcCLB.509623.19	0.525677	1.43961	0.00178529	clathrin coat assembly protein ap19, putative
TcCLB.510187.30	0.525658	1.43959	1.74371e-12	tyrosine aminotransferase
TcCLB.509753.60	0.525511	1.43944	0.127208	Mucin-associated surface protein (MASP), subgroup S106
TcCLB.509997.20	0.525468	1.4394	5.2811e-05	tryparedoxin 2, putative
TcCLB.508433.170	0.525434	1.43937	0.0225859	mucin TcMUCII, putative
TcCLB.510187.50	0.525269	1.4392	8.01179e-13	tyrosine aminotransferase
TcCLB.506627.90	0.525046	1.43898	2.46493e-07	hypothetical protein
TcCLB.508153.950	0.524807	1.43874	6.3412e-05	6-phosphofructo-2-kinase 1
TcCLB.506155.20	0.524715	1.43865	0.000482697	hypothetical protein, conserved
TcCLB.508501.210	0.524629	1.43856	0.00148515	hypothetical protein, conserved
TcCLB.508153.570	0.52448	1.43842	0.00282869	protein kinase, putative
TcCLB.510329.190	0.523941	1.43788	1.71698e-06	hypothetical protein, conserved
TcCLB.511565.10	0.522953	1.43689	0.289801	mucin TcMUCII, putative (fragment)
TcCLB.503775.10	0.522946	1.43689	0.289801	surface protease GP63 (pseudogene), putative
TcCLB.510715.52	0.522832	1.43677	0.239553	surface protease GP63 (pseudogene), putative
TcCLB.506855.330	0.522542	1.43648	0.000996151	hypothetical protein, conserved
TcCLB.507081.60	0.522408	1.43635	6.03147e-05	helicase-like protein, putative
TcCLB.476733.29	0.522404	1.43635	0.17788	serine-threonine dehydratase, putative
TcCLB.506577.160	0.52239	1.43633	0.00822165	hypothetical protein, conserved
TcCLB.508799.200	0.522065	1.43601	0.264787	conserved protein, unknown function
TcCLB.509493.80	0.522032	1.43598	0.243567	mucin TcMUCII, putative
TcCLB.444777.20	0.521557	1.4355	0.000151001	hypothetical protein, conserved
TcCLB.511239.80	0.5205	1.43445	8.957e-05	hypothetical protein, conserved
TcCLB.509745.40	0.519725	1.43368	1.31188e-05	hypothetical protein, conserved
TcCLB.504827.40	0.51969	1.43365	0.000287849	Adaptor protein complex AP-3 subunit beta-3
TcCLB.507069.139	0.519504	1.43346	0.2195	mucin TcMUCII (pseudogene), putative
TcCLB.507167.80	0.519248	1.43321	1.33216e-08	trans-sialidase, Group II, putative
TcCLB.508247.110	0.51893	1.43289	NA	serine-alanine-and proline-rich protein, putative
TcCLB.510031.30	0.518871	1.43283	2.08389e-06	hypothetical protein
TcCLB.511277.380	0.518842	1.4328	0.0174457	hypothetical protein, conserved
TcCLB.507519.90	0.518815	1.43278	0.00318439	hypothetical protein, conserved
TcCLB.507007.37	0.518628	1.43259	0.0614692	hypothetical protein, conserved
TcCLB.508153.260	0.518404	1.43237	0.0208314	hypothetical protein, conserved
TcCLB.511255.370	0.518349	1.43231	0.274735	mucin TcMUCII, putative
TcCLB.506587.80	0.518108	1.43208	0.00515786	hypothetical protein, conserved
TcCLB.511259.120	0.517168	1.43114	0.375559	hypothetical protein
TcCLB.508029.40	0.516353	1.43033	0.0806214	hypothetical protein
TcCLB.503583.50	0.516311	1.43029	0.00144819	hypothetical protein, conserved
TcCLB.511825.66	0.516146	1.43013	0.199506	hypothetical protein, conserved
TcCLB.509671.180	0.516097	1.43008	0.000738658	hypothetical protein, conserved
TcCLB.509593.59	0.515983	1.42997	0.284685	dispersed gene family protein 1 (DGF-1), putative
TcCLB.510329.210	0.515959	1.42994	6.62987e-05	5'-AMP-activated protein kinase catalytic subunit alpha, putative
TcCLB.511517.20	0.515758	1.42975	9.1355e-05	hypothetical protein, conserved
TcCLB.508857.80	0.51534	1.42933	0.00187004	hypothetical protein, conserved
TcCLB.509085.50	0.514769	1.42877	5.78033e-05	trans-sialidase (pseudogene), putative
TcCLB.509237.80	0.514712	1.42871	0.000127863	hypothetical protein, conserved
TcCLB.506627.80	0.514334	1.42833	7.90217e-06	hypothetical protein, conserved
TcCLB.509413.10	0.514192	1.42819	0.00164976	hypothetical protein, conserved
TcCLB.510661.220	0.514116	1.42812	0.000389881	hypothetical protein, conserved
TcCLB.503861.40	0.513026	1.42704	9.73579e-06	trans-sialidase, Group VIII, putative
TcCLB.511277.130	0.512812	1.42683	2.84274e-05	hypothetical protein, conserved
TcCLB.506151.20	0.512741	1.42676	1.11778e-06	hypothetical protein, conserved
TcCLB.510359.610	0.512582	1.4266	0.0191661	trans-sialidase, Group II, putative
TcCLB.510417.20	0.512372	1.42639	0.397669	Mucin-associated surface protein (MASP) (pseudogene)
TcCLB.506445.40	0.511691	1.42572	0.0021553	ubiquitin hydrolase (pseudogene), putative
TcCLB.508871.20	0.511544	1.42557	0.147795	mucin TcMUCII, putative
TcCLB.507023.80	0.511261	1.4253	0.000612931	hypothetical protein, conserved
TcCLB.508735.10	0.511199	1.42523	0.0223619	trans-sialidase (pseudogene), putative
TcCLB.511277.300	0.510949	1.42499	1.78037e-05	hypothetical protein
TcCLB.507849.60	0.510267	1.42431	0.00376797	hypothetical protein, conserved
TcCLB.506855.240	0.509798	1.42385	1.35949e-07	hook complex protein, conserved (pseudogene)
TcCLB.503973.250	0.509684	1.42374	0.329357	mucin TcMUCII (pseudogene), putative
TcCLB.506247.430	0.509373	1.42343	0.00457856	hypothetical protein, conserved
TcCLB.509753.310	0.508783	1.42285	0.0526508	Mucin-associated surface protein (MASP), subgroup S066
TcCLB.509717.40	0.508598	1.42267	0.00036498	hypothetical protein, conserved
TcCLB.507935.20	0.508308	1.42238	0.400308	ATPase (pseudogene), putative
TcCLB.503965.10	0.50819	1.42227	0.0380951	hypothetical protein, conserved
TcCLB.509399.170	0.50815	1.42223	0.00385956	elongation factor 1-gamma (EF-1-gamma), putative
TcCLB.511289.110	0.507294	1.42138	0.00754069	centrosomal protein of 104 kDa
TcCLB.511481.40	0.507267	1.42135	0.0042211	N-Acetyl-D-glucosaminylphosphatidylinositol de-N-acetylase, putative
TcCLB.504175.30	0.507259	1.42135	0.000319202	hypothetical protein, conserved
TcCLB.510629.360	0.506934	1.42103	0.391354	mucin TcMUCII (pseudogene), putative
TcCLB.506727.10	0.506735	1.42083	0.000644495	hypothetical protein
TcCLB.510359.580	0.506402	1.4205	0.173379	mucin TcMUCII, putative
TcCLB.504949.39	0.506342	1.42044	0.00177263	DNA repair protein Rad9, putative (fragment)
TcCLB.508221.160	0.506334	1.42044	0.340207	surface protease GP63 (pseudogene), putative
TcCLB.508629.100	0.505916	1.42002	0.0013983	trans-sialidase (pseudogene), putative
TcCLB.508707.220	0.505701	1.41981	0.326026	hypothetical protein
TcCLB.510819.100	0.505545	1.41966	0.000728623	mitochondrial carrier protein, putative
TcCLB.511757.70	0.505111	1.41923	2.74919e-05	trans-sialidase, Group II, putative
TcCLB.506469.130	0.50432	1.41845	0.0316512	SNARE domain-containing protein, putative
TcCLB.508051.20	0.504236	1.41837	3.5619e-05	hypothetical protein, conserved
TcCLB.509671.189	0.504032	1.41817	0.00187674	hypothetical protein, conserved
TcCLB.505999.140	0.503916	1.41806	0.00118684	Metal-binding domain-containing protein
TcCLB.510575.180	0.503726	1.41787	0.00298205	adenylate kinase, putative
TcCLB.511821.30	0.503725	1.41787	0.00173694	Mu-adaptin 1, putative
TcCLB.506297.130	0.503588	1.41774	0.00231786	zinc finger ccch and cchc domain-containing protein
TcCLB.511003.60	0.503277	1.41743	2.25902e-06	3-ketoacyl-CoA thiolase, putative
TcCLB.508573.80	0.503127	1.41728	0.0703664	trans-sialidase (pseudogene), putative
TcCLB.511281.30	0.503059	1.41722	0.00174915	RNA-binding protein 27, putative
TcCLB.510643.110	0.502523	1.41669	0.00810152	beta galactofuranosyl glycosyltransferase, putative
TcCLB.506853.10	0.502253	1.41642	1.96936e-09	hypothetical protein, conserved
TcCLB.509525.100	0.502198	1.41637	0.00709877	trans-sialidase (pseudogene), putative
TcCLB.508879.100	0.50201	1.41619	3.8356e-06	hypothetical protein, conserved
TcCLB.510693.310	0.501977	1.41615	0.334382	syntaxin binding protein (pseudogene), putative
TcCLB.509611.110	0.500954	1.41515	7.37825e-05	RNA-editing complex protein, putative
TcCLB.511027.29	0.500764	1.41496	0.003589	hypothetical protein, conserved (pseudogene)
TcCLB.510795.10	0.500706	1.41491	1.96169e-11	tyrosine aminotransferase
TcCLB.507633.21	0.50054	1.41474	NA	Mucin-associated surface protein (MASP) (pseudogene)
TcCLB.507661.10	0.500496	1.4147	0.393502	retrotransposon hot spot protein (RHS, pseudogene), putative
TcCLB.508303.20	0.500224	1.41443	0.0740023	hypothetical protein
TcCLB.506613.60	0.500202	1.41441	0.173984	mucin TcMUCII (pseudogene), putative
TcCLB.509213.110	0.500113	1.41432	7.29632e-06	hypothetical protein, conserved
TcCLB.511773.60	0.500094	1.41431	0.000346558	glycine dehydrogenase [decarboxylating] (pseudogene), putative
TcCLB.507003.60	0.5	1.41421	0.000587558	hypothetical protein, conserved
TcCLB.508433.90	0.499951	1.41417	0.404826	Mucin-associated surface protein (MASP), subgroup S061
TcCLB.504067.10	0.499658	1.41388	0.215738	dispersed gene family protein 1 (DGF-1), putative
TcCLB.511255.30	0.499426	1.41365	0.244035	Mucin-associated surface protein (MASP), subgroup S033
TcCLB.511481.30	0.499043	1.41328	0.00787566	hypothetical protein, conserved
TcCLB.506855.10	0.498742	1.41298	0.00026247	palmitoyl acyltransferase 3, putative
TcCLB.424123.30	0.498697	1.41294	0.109637	hypothetical protein, conserved
TcCLB.504081.370	0.498263	1.41251	0.13873	hypothetical protein
TcCLB.508445.50	0.497549	1.41181	0.0317206	hypothetical protein, conserved
TcCLB.510651.20	0.497467	1.41173	0.0137497	hypothetical protein, conserved
TcCLB.506831.79	0.497248	1.41152	0.227071	pre-mRNA splicing factor ATP-dependent RNA helicase, putative
TcCLB.507519.210	0.497213	1.41148	0.000457662	glycine dehydrogenase [decarboxylating] (pseudogene), putative
TcCLB.507087.80	0.497138	1.41141	9.1355e-05	5'-3' exoribonuclease B, putative
TcCLB.508079.10	0.497074	1.41135	0.0022375	conserved protein
TcCLB.509527.140	0.496959	1.41124	0.306648	hypothetical protein
TcCLB.509753.300	0.49671	1.41099	0.242763	mucin TcMUCII, putative
TcCLB.511907.120	0.496387	1.41068	0.0664714	mucin-like glycoprotein, putative
TcCLB.507023.124	0.496288	1.41058	0.0230759	hypothetical protein, conserved
TcCLB.503655.30	0.495963	1.41026	0.133008	mucin-like glycoprotein, putative
TcCLB.511033.29	0.49552	1.40983	0.131888	hypothetical protein
TcCLB.506425.50	0.494938	1.40926	9.87794e-05	hypothetical protein, conserved
TcCLB.509027.60	0.494742	1.40907	0.00744451	kinetoplastid kinetochore protein 10, putative
TcCLB.506751.148	0.494599	1.40893	0.061039	mucin TcMUCII (pseudogene), putative
TcCLB.510187.460	0.49458	1.40891	0.345547	hypothetical protein
TcCLB.511249.80	0.494383	1.40872	0.00897964	hypothetical protein, conserved
TcCLB.508355.230	0.49421	1.40855	0.00779189	hypothetical protein
TcCLB.504081.270	0.494146	1.40849	0.394162	mucin TcMUCII, putative
TcCLB.510697.25	0.49404	1.40838	0.140271	surface protease GP63 (pseudogene), putative
TcCLB.503597.5	0.494022	1.40837	0.173836	hypothetical protein (fragment)
TcCLB.510661.140	0.493925	1.40827	0.000396144	hypothetical protein, conserved
TcCLB.509999.20	0.493805	1.40815	8.29776e-06	hypothetical protein, conserved
TcCLB.503679.40	0.493725	1.40808	0.0976062	actin-related protein 2, putative
TcCLB.503583.10	0.49362	1.40797	0.00900912	metallo-peptidase, Clan MC, Family M14, putative
TcCLB.460747.20	0.493453	1.40781	0.00047689	hypothetical protein, conserved
TcCLB.507991.80	0.493325	1.40769	0.000251012	hypothetical protein, conserved
TcCLB.509319.109	0.493212	1.40758	0.023856	paraflagellar rod protein, putative (fragment)
TcCLB.508737.10	0.492931	1.4073	0.0158219	Trypomastigote, Alanine, Serine and Valine rich protein (TASV), subfamily C
TcCLB.509879.30	0.492925	1.4073	0.00251791	hypothetical protein, conserved
TcCLB.510887.14	0.492737	1.40711	0.00193099	chaperone DNAJ protein, putative
TcCLB.510003.41	0.492682	1.40706	0.00197905	clathrin coat assembly protein ap19, putative
TcCLB.506337.171	0.492674	1.40705	0.00870426	ubiquitin (pseudogene), putative
TcCLB.503839.39	0.492484	1.40687	0.000520753	hypothetical protein, conserved
TcCLB.508443.30	0.491596	1.406	8.97277e-05	hypothetical protein, conserved
TcCLB.506619.40	0.491332	1.40574	0.381665	tyrosyl-DNA Phosphodiesterase (Tdp1), putative
TcCLB.503461.40	0.491286	1.4057	0.251476	succinyl-CoA:3-ketoacid-coenzyme-A transferase (pseudogene), putative
TcCLB.511907.10	0.490708	1.40513	0.156449	hypothetical protein, conserved
TcCLB.508139.120	0.490663	1.40509	0.00942504	hypothetical protein
TcCLB.504155.140	0.489883	1.40433	0.331644	mucin TcMUCII, putative
TcCLB.509029.120	0.489854	1.4043	0.000595354	ATP-dependent DNA helicase, putative
TcCLB.509797.9	0.489852	1.4043	0.00211074	hypothetical protein, conserved (pseudogene)
TcCLB.506469.120	0.489337	1.4038	0.0262234	hypothetical protein, conserved
TcCLB.507857.30	0.489098	1.40357	0.000611569	hypothetical protein, conserved
TcCLB.509033.50	0.488446	1.40293	0.000101884	hypothetical protein, conserved
TcCLB.506459.219	0.488442	1.40293	0.0824215	mucin TcMUCII, putative
TcCLB.509399.90	0.488372	1.40286	0.000769109	hypothetical protein
TcCLB.508899.30	0.487909	1.40241	0.00330146	hypothetical protein, conserved
TcCLB.506007.30	0.487738	1.40224	0.00372463	Protein C21orf2 homolog, putative
TcCLB.510087.50	0.487676	1.40218	3.4888e-05	hypothetical protein, conserved
TcCLB.507787.100	0.487085	1.40161	0.194692	gamma-glutamylcysteine synthetase, putative
TcCLB.508933.5	0.486961	1.40149	0.0641979	serine/threonine protein phosphatase PP1 (fragment)
TcCLB.508461.344	0.486881	1.40141	0.00915279	hypothetical protein, conserved
TcCLB.504021.120	0.486479	1.40102	0.000564246	hypothetical protein, conserved
TcCLB.508693.100	0.486466	1.40101	0.0145249	surface protease GP63, putative
TcCLB.508573.39	0.48642	1.40096	0.064769	dispersed gene family protein 1 (DGF-1), putative
TcCLB.508819.50	0.486274	1.40082	0.00404672	katanin, putative (fragment)
TcCLB.509029.160	0.486072	1.40063	0.000131843	hypothetical protein, conserved
TcCLB.506425.160	0.484645	1.39924	0.00763569	hypothetical protein, conserved
TcCLB.506415.10	0.484583	1.39918	6.97963e-06	dispersed gene family protein 1 (DGF-1), putative
TcCLB.509207.100	0.484461	1.39906	0.0010789	hypothetical protein, conserved
TcCLB.507023.180	0.484356	1.39896	0.0013084	protein kinase, putative
TcCLB.510489.50	0.484228	1.39884	0.234681	trans-sialidase, putative
TcCLB.508859.10	0.484226	1.39883	0.00449258	hypothetical protein, conserved
TcCLB.506477.14	0.484215	1.39882	0.00470535	hypothetical protein, conserved
TcCLB.511251.10	0.48383	1.39845	0.41244	hypothetical protein
TcCLB.509753.70	0.483674	1.3983	0.220722	Mucin-associated surface protein (MASP), subgroup S106
TcCLB.510187.150	0.483447	1.39808	7.28797e-05	guanylate kinase, putative
TcCLB.508001.106	0.483262	1.3979	0.0328621	serine/threonine protein kinase (pseudogene), putative
TcCLB.508059.20	0.482091	1.39677	0.00154571	hypothetical protein, conserved
TcCLB.504177.20	0.482055	1.39673	7.94342e-05	fatty acyl CoA synthetase 2, putative
TcCLB.457339.19	0.481871	1.39655	0.00904193	hypothetical protein, conserved
TcCLB.509859.70	0.481801	1.39649	0.0169485	hypothetical protein, conserved
TcCLB.509035.20	0.481559	1.39625	0.0400816	surface protease GP63, putative
TcCLB.508417.20	0.481545	1.39624	0.429538	hypothetical protein
TcCLB.503999.60	0.481509	1.3962	0.000348486	phosphoprotein phosphatase, putative
TcCLB.509417.9	0.481353	1.39605	0.0414288	trans-sialidase, putative
TcCLB.507681.210	0.481259	1.39596	7.77442e-09	Flagellar Member 2
TcCLB.503823.100	0.480881	1.3956	0.00132917	hypothetical protein, conserved
TcCLB.509901.100	0.480861	1.39558	2.92252e-07	hypothetical protein, conserved
TcCLB.506177.90	0.480831	1.39555	0.0495114	hypothetical protein, conserved
TcCLB.509429.41	0.480641	1.39536	0.150428	trans-sialidase (pseudogene), putative
TcCLB.510329.40	0.480488	1.39522	0.00168901	hypothetical protein, conserved
TcCLB.508017.30	0.480414	1.39514	3.34935e-11	amino acid transporter, putative (fragment)
TcCLB.511255.80	0.480164	1.3949	0.0500031	Mucin-associated surface protein (MASP), subgroup S030
TcCLB.508917.40	0.479998	1.39474	0.000362594	hypothetical protein, conserved
TcCLB.509229.140	0.47965	1.39441	5.00423e-05	hypothetical protein, conserved
TcCLB.507637.170	0.479583	1.39434	0.2147	surface protease GP63, putative
TcCLB.507025.40	0.479574	1.39433	0.00650959	hypothetical protein
TcCLB.503769.20	0.479531	1.39429	0.0558902	trans-sialidase (pseudogene), putative
TcCLB.510265.110	0.479424	1.39419	NA	hypothetical protein, conserved
TcCLB.509561.20	0.478445	1.39324	0.00286606	Flagellum adhesion protein 1
TcCLB.506629.160	0.478209	1.39301	0.0041054	hypothetical protein, conserved
TcCLB.504155.150	0.477917	1.39273	0.000509893	surface protease GP63, putative
TcCLB.511277.120	0.477565	1.39239	0.00649653	hypothetical protein, conserved
TcCLB.508713.30	0.477544	1.39237	NA	hypothetical protein, conserved
TcCLB.503939.120	0.477325	1.39216	0.0125571	hypothetical protein, conserved
TcCLB.509643.20	0.476987	1.39183	0.00214567	hypothetical protein, conserved
TcCLB.510655.30	0.476799	1.39165	1e-07	helicase, putative
TcCLB.508707.234	0.476712	1.39157	0.0578015	hypothetical protein, conserved
TcCLB.506193.70	0.476575	1.39144	0.111733	glucose-6-phosphate dehydrogenase (pseudogene), putative
TcCLB.510435.10	0.475972	1.39086	0.00749192	hypothetical protein, conserved
TcCLB.509237.140	0.475875	1.39076	0.0017364	calpain-like cysteine peptidase, putative
TcCLB.503913.29	0.475839	1.39073	0.0840533	hypothetical protein, conserved
TcCLB.510823.10	0.475314	1.39022	3.68895e-05	hypothetical protein, conserved
TcCLB.510901.170	0.475105	1.39002	0.00257062	hypothetical protein, conserved
TcCLB.507031.50	0.475019	1.38994	0.154785	hypothetical protein, conserved
TcCLB.503395.20	0.474731	1.38966	0.00190467	hypothetical protein, conserved
TcCLB.510655.110	0.474684	1.38961	0.000154085	poly(A)-specific ribonuclease PARN, putative
TcCLB.511849.20	0.474405	1.38935	0.0172433	mucin TcMUCI, putative
TcCLB.508525.5	0.474268	1.38921	0.161903	cAMP response protein 1, putative (pseudogene)
TcCLB.508461.70	0.474173	1.38912	0.107289	hypothetical protein
TcCLB.510355.41	0.474029	1.38898	0.00371939	Mucin-associated surface protein (MASP) (pseudogene)
TcCLB.511809.20	0.474001	1.38896	0.00103217	methylenetetrahydrofolate dehydrogenase-like protein, putative
TcCLB.507053.80	0.473816	1.38878	0.000160197	hypothetical protein, conserved
TcCLB.506841.8	0.473777	1.38874	0.00288863	hypothetical protein, conserved
TcCLB.509005.50	0.473024	1.38802	0.000227564	hypothetical protein, conserved
TcCLB.510885.160	0.472988	1.38798	0.000125172	Flagellum attachment zone protein 2
TcCLB.508879.180	0.472687	1.38769	0.0038724	hypothetical protein, conserved
TcCLB.508881.70	0.472448	1.38746	8.25418e-08	DNA ligase, putative
TcCLB.506681.50	0.472206	1.38723	4.93929e-05	hypothetical protein, conserved
TcCLB.511857.70	0.471594	1.38664	0.000871891	hypothetical protein, conserved
TcCLB.509163.70	0.471425	1.38648	0.273849	protein kinase, putative
TcCLB.510661.260	0.470972	1.38604	0.000391516	hypothetical protein, conserved
TcCLB.503809.40	0.470931	1.386	0.000166901	protein kinase, putative
TcCLB.509289.10	0.470547	1.38563	0.274817	amastin, putative
TcCLB.510265.14	0.470361	1.38546	0.00236851	hypothetical protein, conserved
TcCLB.508461.350	0.470275	1.38537	0.000201691	hypothetical protein, conserved
TcCLB.506807.20	0.469936	1.38505	0.0973069	hypothetical protein, conserved
TcCLB.482319.19	0.469482	1.38461	0.0253439	hypothetical protein, conserved
TcCLB.510701.10	0.469266	1.3844	0.422302	Mucin-associated surface protein (MASP), subgroup S070
TcCLB.508621.30	0.468711	1.38387	0.00290235	choline/carnitine O-acyltransferase (pseudogene), putative
TcCLB.506153.3	0.468119	1.3833	3.39114e-05	hypothetical protein, conserved
TcCLB.510385.5	0.467839	1.38304	0.395994	hypothetical protein, conserved (pseudogene)
TcCLB.507005.20	0.467802	1.383	0.00276223	hypothetical protein, conserved
TcCLB.511717.60	0.467668	1.38287	0.00173322	hypothetical protein, conserved
TcCLB.506321.260	0.467121	1.38235	0.0653258	hypothetical protein, conserved
TcCLB.425785.9	0.466799	1.38204	0.431564	Coiled-coil domain-containing protein 40 homolog (fragment)
TcCLB.511153.90	0.466527	1.38178	0.00148004	phopshatase, putative
TcCLB.507753.10	0.466017	1.38129	0.0021553	trans-sialidase, Group III, putative
TcCLB.507519.120	0.46584	1.38112	0.00371939	hypothetical protein, conserved
TcCLB.511837.10	0.465786	1.38107	0.000822971	vesicle-associated membrane protein, putative
TcCLB.511165.30	0.465315	1.38062	0.0626966	hypothetical protein, conserved
TcCLB.503607.7	0.464959	1.38028	0.00571187	glycine dehydrogenase (pseudogene), putative
TcCLB.506247.410	0.464951	1.38027	0.180601	protein-l-isoaspartate o-methyltransferase, putative
TcCLB.506475.120	0.464866	1.38019	0.00484905	conserved protein, unknown function
TcCLB.503925.30	0.464498	1.37984	0.0148955	protein kinase, putative
TcCLB.506583.4	0.464353	1.3797	0.128977	serine/threonine protein kinase, putative
TcCLB.506471.30	0.464096	1.37945	0.109412	trans-sialidase, Group II, putative
TcCLB.511839.10	0.463726	1.3791	0.0899528	mucin TcMUCII, putative
TcCLB.504575.20	0.463725	1.3791	0.000665855	hypothetical protein, conserved
TcCLB.506999.150	0.46372	1.37909	5.25423e-05	vesicle-associated membrane protein, putative
TcCLB.503723.60	0.463648	1.37902	0.00200545	tartrate-resistant acid phosphatase type 5 precursor, putative
TcCLB.508247.70	0.463556	1.37894	0.299704	mucin TcMUCII, putative
TcCLB.510575.140	0.463433	1.37882	0.000590491	hypothetical protein, conserved
TcCLB.509329.31	0.463363	1.37875	0.166801	trans-sialidase, putative
TcCLB.508461.90	0.463228	1.37862	0.00012862	hypothetical protein, conserved
TcCLB.510303.310	0.463006	1.37841	6.38818e-05	protein arginine n-methyltransferase 7
TcCLB.511809.40	0.462461	1.37789	0.0126307	hypothetical protein, conserved
TcCLB.511727.40	0.462386	1.37782	7.8684e-06	ubiquitin-conjugating enzyme E2, putative
TcCLB.509747.30	0.462063	1.37751	3.67652e-06	hypothetical protein, conserved
TcCLB.506985.20	0.461919	1.37737	0.00449522	hypothetical protein, conserved
TcCLB.509727.10	0.461872	1.37733	0.438737	hypothetical protein (pseudogene)
TcCLB.508641.240	0.461779	1.37724	0.00641192	hypothetical protein, conserved
TcCLB.505037.60	0.461541	1.37701	0.000914302	Mitogen-activated kinase kinase kinase, putative
TcCLB.508547.20	0.46131	1.37679	0.374277	pre-rrna-processing protein tsr1 homolog
TcCLB.508355.114	0.461214	1.3767	0.0248309	hypothetical protein, conserved
TcCLB.511859.120	0.461006	1.3765	0.283916	mucin-like glycoprotein, putative
TcCLB.506355.160	0.460983	1.37648	5.62942e-05	hypothetical protein, conserved
TcCLB.510239.40	0.46096	1.37646	0.258598	Mucin-associated surface protein (MASP) (pseudogene)
TcCLB.506315.30	0.460959	1.37646	0.262854	protein phosphatase 1 catalitic subunit, putative
TcCLB.511517.170	0.460556	1.37607	0.00612447	hypothetical protein, conserved
TcCLB.506905.40	0.46049	1.37601	0.0588799	ABC transporter, putative
TcCLB.506201.170	0.460424	1.37595	0.250059	Flagellar attachment zone protein 1, putative
TcCLB.503631.9	0.460409	1.37593	5.1212e-05	hypothetical protein, conserved
TcCLB.508739.70	0.460286	1.37581	1.15776e-05	protein kinase, putative
TcCLB.506913.10	0.460177	1.37571	0.380251	hypothetical protein, conserved
TcCLB.510661.230	0.46009	1.37563	6.47053e-05	hypothetical protein, conserved
TcCLB.509719.50	0.460037	1.37558	0.0264343	protein kinase, putative
TcCLB.511921.90	0.459452	1.37502	0.0128765	Mucin-associated surface protein (MASP) (pseudogene)
TcCLB.506257.70	0.459115	1.3747	0.000861937	hypothetical protein, conserved
TcCLB.511855.70	0.459057	1.37464	0.000555359	protein kinase, putative
TcCLB.508461.390	0.459047	1.37463	0.00267715	hypothetical protein, conserved
TcCLB.506419.20	0.459041	1.37463	0.000144765	tousled-like kinase II, putative
TcCLB.506471.40	0.458717	1.37432	0.0411229	beta galactofuranosyl glycosyltransferase, putative
TcCLB.508297.61	0.458004	1.37364	0.0215052	choline ethanolamine kinase, putative
TcCLB.509399.120	0.457884	1.37353	0.00374863	hypothetical protein, conserved
TcCLB.507723.160	0.457705	1.37336	0.00124302	hypothetical protein, conserved
TcCLB.504741.50	0.457657	1.37331	0.125744	hypothetical protein, conserved
TcCLB.510401.31	0.457642	1.3733	0.144909	retrotransposon hot spot protein (RHS, pseudogene), putative
TcCLB.511163.40	0.457482	1.37314	0.000208869	cell cycle sequence binding phosphoprotein (RBP45), putative
TcCLB.511301.90	0.457437	1.3731	0.00349115	protein kinase, putative
TcCLB.504827.80	0.457194	1.37287	0.0251371	hypothetical protein, conserved
TcCLB.510643.90	0.456899	1.37259	0.106467	Mucin-associated surface protein (MASP) (pseudogene)
TcCLB.507063.340	0.456859	1.37255	0.133281	Mucin-associated surface protein (MASP), subgroup S025
TcCLB.506975.80	0.456621	1.37232	0.0106574	trans-sialidase, Group I, putative
TcCLB.508015.30	0.456424	1.37214	0.113482	hypothetical protein
TcCLB.510643.130	0.456389	1.3721	0.0140147	damage-specific DNA binding protein, putative
TcCLB.509223.60	0.455652	1.3714	0.113435	beta galactofuranosyl glycosyltransferase, putative
TcCLB.511523.40	0.455524	1.37128	0.0114313	hypothetical protein, conserved
TcCLB.504109.110	0.455502	1.37126	0.00014519	cleavage and polyadenylation specificity factor, putative
TcCLB.504021.140	0.455432	1.37119	0.000682662	hypothetical protein, conserved
TcCLB.509525.50	0.455379	1.37114	0.374513	hypothetical protein
TcCLB.507849.40	0.455118	1.3709	0.000365185	hypothetical protein, conserved
TcCLB.507061.49	0.454777	1.37057	0.102324	hypothetical protein
TcCLB.508409.90	0.454332	1.37015	1.98426e-06	hypothetical protein, conserved
TcCLB.506999.40	0.454311	1.37013	0.000139562	metacaspase 5, putative
TcCLB.460125.10	0.454292	1.37011	0.416441	hypothetical protein, conserved (fragment)
TcCLB.508429.20	0.454038	1.36987	0.000250528	mucin-like glycoprotein, putative
TcCLB.509661.10	0.453971	1.36981	0.084017	retrotransposon hot spot protein (RHS, pseudogene), putative
TcCLB.509985.20	0.453907	1.36974	0.00176735	hypothetical protein, conserved
TcCLB.509331.120	0.453348	1.36921	1.14616e-06	hypothetical protein, conserved
TcCLB.509461.80	0.453322	1.36919	0.0334375	hypothetical protein, conserved
TcCLB.506009.109	0.453052	1.36893	0.142181	hypothetical protein, conserved
TcCLB.508543.70	0.452738	1.36864	0.000426116	hypothetical protein, conserved
TcCLB.504105.10	0.452494	1.3684	0.0160138	hypothetical protein, conserved
TcCLB.506009.40	0.452282	1.3682	0.463394	hypothetical protein
TcCLB.511895.20	0.45189	1.36783	0.00144969	hypothetical protein
TcCLB.510359.690	0.451734	1.36768	0.330828	Mucin-associated surface protein (MASP) (fragment)
TcCLB.511929.40	0.451479	1.36744	0.205497	trans-sialidase (pseudogene), putative
TcCLB.507771.120	0.45105	1.36704	0.00858472	trans-sialidase (pseudogene), putative
TcCLB.509437.170	0.45103	1.36702	0.0819678	hypothetical protein
TcCLB.503823.50	0.450593	1.3666	0.00168531	hypothetical protein, conserved
TcCLB.510397.20	0.450413	1.36643	0.073126	trans-sialidase (pseudogene), putative
TcCLB.506415.30	0.45025	1.36628	0.00351022	hypothetical protein, conserved
TcCLB.506319.50	0.450093	1.36613	0.00448441	hypothetical protein, conserved
TcCLB.510887.60	0.450008	1.36605	0.00295912	hypothetical protein, conserved
TcCLB.509257.10	0.449636	1.3657	0.000102149	trans-sialidase, Group II, putative
TcCLB.508461.60	0.449567	1.36563	0.00522749	synaptojanin (N-terminal domain), putative
TcCLB.509023.209	0.449029	1.36512	0.068373	hypothetical protein, conserved
TcCLB.410199.50	0.448665	1.36478	NA	hypothetical protein
TcCLB.511487.170	0.448566	1.36468	0.0165004	Mucin-associated surface protein (MASP), subgroup S001
TcCLB.511863.20	0.448503	1.36462	0.000144667	hypothetical protein, conserved
TcCLB.506193.60	0.4484	1.36453	2.0989e-05	ascorbate peroxidase, putative
TcCLB.506701.10	0.448308	1.36444	0.187661	dihydrolipoamide dehydrogenase, putative
TcCLB.414243.20	0.448199	1.36434	0.0102055	hypothetical protein, conserved
TcCLB.510357.10	0.447914	1.36407	3.0242e-06	J-binding protein
TcCLB.506709.50	0.447766	1.36393	0.0384367	hypothetical protein, conserved
TcCLB.509771.10	0.447282	1.36347	0.0300778	trans-sialidase, Group II, putative
TcCLB.509023.150	0.44706	1.36326	0.00447748	integral membrane transport protein, putative
TcCLB.510421.60	0.446782	1.363	0.000984183	hypothetical protein, conserved
TcCLB.509849.10	0.446747	1.36296	0.152751	ammonium transporter, putative
TcCLB.511321.30	0.446523	1.36275	0.396405	hypothetical protein, conserved
TcCLB.511233.100	0.446501	1.36273	0.0277312	NUDIX hydrolase 3, putative
TcCLB.508175.350	0.446487	1.36272	0.0162192	Present in the outer mitochondrial membrane proteome 35
TcCLB.508909.310	0.446421	1.36266	0.257522	hypothetical protein
TcCLB.508919.130	0.446312	1.36255	2.05477e-05	hypothetical protein, conserved
TcCLB.509053.50	0.446277	1.36252	0.190693	hypothetical protein, conserved
TcCLB.507071.130	0.446135	1.36239	0.472386	hypothetical protein
TcCLB.503973.170	0.445987	1.36225	0.472716	hypothetical protein
TcCLB.511291.129	0.445949	1.36221	0.0837264	hypothetical protein, conserved
TcCLB.511491.9	0.445923	1.36218	0.0144459	hypothetical protein, conserved
TcCLB.508233.4	0.445835	1.3621	0.000279973	protein transport protein Sec23A, putative (fragment)
TcCLB.508933.20	0.445809	1.36208	0.0387664	dihydrolipoamide dehydrogenase, putative
TcCLB.511165.40	0.445773	1.36204	0.000326813	acidocalcisomal pyrophosphatase, putative
TcCLB.507609.40	0.445642	1.36192	2.02394e-09	delta-4 fatty acid desaturase, putative
TcCLB.508445.40	0.445429	1.36172	0.00399078	hypothetical protein, conserved
TcCLB.508699.20	0.445129	1.36144	9.21046e-05	Translation initiation factor eIF-2B subunit epsilon, putative
TcCLB.505171.109	0.444642	1.36098	0.123128	Present in the outer mitochondrial membrane proteome 17 (fragment)
TcCLB.509789.50	0.444327	1.36068	0.00266163	rab-like GTPase activating protein, putative
TcCLB.509985.69	0.444158	1.36052	0.0311052	hypothetical protein, conserved
TcCLB.509179.210	0.443953	1.36033	0.0152969	hypothetical protein, conserved
TcCLB.506855.110	0.443808	1.36019	0.000233008	hypothetical protein, conserved
TcCLB.508979.80	0.443559	1.35996	0.0182546	hypothetical protein, conserved
TcCLB.511405.20	0.443229	1.35964	0.38084	mucin TcMUC (pseudogene), putative
TcCLB.511301.40	0.442906	1.35934	0.0604165	eukaryotic translation initiation factor 4E (eIF4E) interacting protein, putative
TcCLB.508933.10	0.4427	1.35915	0.00655327	dihydrolipoamide dehydrogenase, putative
TcCLB.508979.90	0.442068	1.35855	0.0130949	hypothetical protein
TcCLB.432997.10	0.442036	1.35852	0.322737	trans-sialidase, putative
TcCLB.507221.70	0.441407	1.35793	0.000797494	hypothetical protein, conserved
TcCLB.508919.100	0.44119	1.35772	0.00209432	hypothetical protein, conserved
[truncated: 8,786 more rows]

## Sheet: Pd-dppf-mpo Upregulated genes
Gene ID	Fold Change	p adj (FDR)	Product Description
TcCLB.507063.60	9.54891	8.97934e-63	hypothetical protein, conserved
TcCLB.506009.10	8.47712	9.08917e-34	hypothetical protein, conserved
TcCLB.510217.10	7.744	3.52639e-19	hypothetical protein
TcCLB.508965.70	6.11108	5.68132e-10	hypothetical protein, conserved
TcCLB.509547.10	5.43121	1.81138e-10	hypothetical protein
TcCLB.508701.20	4.90466	4.26813e-195	cation transporter, putative
TcCLB.509755.89	4.9004	5.86516e-10	hypothetical protein
TcCLB.510223.9	4.68464	1.31773e-15	hypothetical protein, conserved
TcCLB.509105.120	4.53682	2.22532e-36	protein kinase, putative
TcCLB.511283.120	4.39933	1.53303e-05	hypothetical protein, conserved
TcCLB.510007.20	4.29006	4.16993e-27	hypothetical protein, conserved
TcCLB.508873.410	4.27322	6.8979e-15	hypothetical protein, conserved
TcCLB.472833.10	4.12523	6.72231e-13	hypothetical protein, conserved
TcCLB.511263.40	3.98818	3.84596e-06	hypothetical protein, conserved
TcCLB.511247.9	3.91759	5.8781e-07	hypothetical protein, conserved
TcCLB.506319.40	3.86546	6.46969e-16	hypothetical protein
TcCLB.506241.80	3.80915	5.43915e-53	hypothetical protein, conserved
TcCLB.510305.70	3.75301	8.07798e-21	hypothetical protein, conserved
TcCLB.510581.20	3.68612	3.81825e-45	receptor-type adenylate cyclase, putative
TcCLB.511653.20	3.63238	2.64332e-15	dual-specificity protein phosphatase, putative
TcCLB.509937.130	3.62012	0.000206424	protein kinase, putative
TcCLB.508065.70	3.60466	7.0223e-27	protein associated with differentiation 8, putative
TcCLB.511649.100	3.60413	6.13367e-22	amino acid permease, putative
TcCLB.507515.100	3.45817	3.63202e-19	hypothetical protein, conserved
TcCLB.511277.200	3.43523	6.33828e-08	RNA-binding protein, putative
TcCLB.506475.90	3.42934	2.33227e-15	hypothetical protein, conserved
TcCLB.505193.60	3.41136	2.51074e-10	hypothetical protein, conserved
TcCLB.508231.190	3.35894	1.10654e-25	ATP-binding cassette protein subfamily G
TcCLB.504173.40	3.3545	7.71158e-08	hypothetical protein
TcCLB.511261.120	3.34891	9.64485e-23	pumilio/PUF RNA binding protein 2, putative
TcCLB.506247.190	3.28367	4.9047e-05	nuclear lim interactor-interacting factor, putative
TcCLB.511481.70	3.28121	0.000146383	RNA-binding protein 5, putative
TcCLB.506479.120	3.26956	3.74752e-24	cytidine triphosphate synthase, putative
TcCLB.511857.10	3.26913	5.66772e-56	hypothetical protein, conserved
TcCLB.509163.50	3.23483	3.10421e-07	hypothetical protein
TcCLB.511857.50	3.15967	3.70563e-35	actin-like protein, putative
TcCLB.506297.350	3.15753	2.82457e-12	SKP1-like protein
TcCLB.507019.130	3.15707	3.49956e-14	hypothetical protein
TcCLB.508815.10	3.15359	1.71742e-12	hypothetical protein, conserved
TcCLB.506577.5	3.14901	3.27986e-19	hypothetical protein
TcCLB.510045.20	3.1472	1.70134e-10	ABC transporter, putative
TcCLB.506435.50	3.12256	1.68234e-27	hypothetical protein, conserved
TcCLB.504105.100	3.11658	1.12267e-40	hypothetical protein
TcCLB.509573.10	3.10547	1.06061e-27	small GTP-binding protein Rab7, putative
TcCLB.511755.80	3.10237	6.84721e-09	formin, putative
TcCLB.503583.100	3.10068	8.20421e-11	hypothetical protein, conserved
TcCLB.511277.140	3.07472	2.46895e-26	serine/threonine protein kinase, putative
TcCLB.506559.190	3.0711	1.46094e-27	kinatase, putative
TcCLB.503781.30	3.02847	8.20989e-24	hypothetical protein, conserved
TcCLB.503733.30	3.0284	5.08796e-38	hypothetical protein, conserved
TcCLB.511459.20	3.02699	9.91083e-30	hypothetical protein, conserved
TcCLB.508669.10	3.02459	2.70393e-46	hypothetical protein, conserved
TcCLB.506479.10	2.98795	1.04768e-14	hypothetical protein, conserved
TcCLB.511825.240	2.95549	1.73753e-33	hypothetical protein, conserved
TcCLB.506537.240	2.94347	4.24398e-43	hypothetical protein, conserved
TcCLB.508409.310	2.94212	2.14658e-16	hypothetical protein, conserved
TcCLB.508857.30	2.93969	5.93407e-38	trans-sialidase, Group I, putative
TcCLB.509229.20	2.90946	5.72773e-39	hypothetical protein, conserved
TcCLB.508889.19	2.89811	5.59457e-10	hypothetical protein
TcCLB.511887.50	2.88356	1.75767e-14	hypothetical protein, conserved
TcCLB.508859.118	2.87907	3.20471e-19	trans-sialidase, putative
TcCLB.511671.130	2.84662	2.26577e-23	hypothetical protein, conserved
TcCLB.504021.20	2.83633	5.96579e-15	hypothetical protein, conserved
TcCLB.504161.30	2.8353	2.11773e-15	hypothetical protein, conserved
TcCLB.511165.100	2.82437	1.44297e-10	serine/threonine protein kinase, putative
TcCLB.510219.10	2.80756	3.33132e-21	hypothetical protein, conserved
TcCLB.511291.50	2.79202	3.6273e-23	hypothetical protein, conserved
TcCLB.510007.50	2.78361	6.14374e-08	hypothetical protein, conserved
TcCLB.503987.70	2.77769	5.3929e-18	ribosome biogenesis protein TSR3, putative
TcCLB.506793.50	2.75527	5.4389e-25	hypothetical protein, conserved
TcCLB.509637.27	2.73784	4.26644e-18	hypothetical protein, conserved
TcCLB.507087.14	2.73145	3.37972e-14	hypothetical protein, conserved
TcCLB.503411.4	2.71802	0.000138011	hypothetical protein, conserved
TcCLB.511635.80	2.71056	1.93786e-09	hypothetical protein, conserved
TcCLB.506791.10	2.70815	2.23442e-30	CYC2-like cyclin 4, putative
TcCLB.507087.30	2.70159	1.15608e-19	Peptidase C19, ubiquitin carboxyl-terminal hydrolase, putative
TcCLB.511151.54	2.70156	1.56062e-34	surface protease GP63, putative
TcCLB.506275.121	2.69894	1.12046e-06	hypothetical protein
TcCLB.507317.60	2.69369	0.000974279	protein kinase-like protein, putative
TcCLB.506977.10	2.68535	2.55436e-07	dual specificity protein phosphatase, putative
TcCLB.508817.110	2.67912	1.2229e-20	hypothetical protein, conserved
TcCLB.504023.10	2.67757	1.60238e-09	hypothetical protein, conserved
TcCLB.510889.290	2.66533	9.08112e-11	hypothetical protein
TcCLB.509161.10	2.65452	2.18952e-27	ubiquitin-conjugating enzyme E2, putative
TcCLB.503939.60	2.64969	6.79465e-24	hypothetical protein, conserved
TcCLB.510887.30	2.6485	9.02434e-17	hypothetical protein, conserved
TcCLB.503923.40	2.62145	7.24533e-05	hypothetical protein, conserved
TcCLB.508645.40	2.61866	4.83154e-72	nucleoside transporter 1, putative
TcCLB.507705.10	2.6163	0.00031709	hypothetical protein, conserved
TcCLB.503559.70	2.61113	8.25608e-28	cystinosin, putative
TcCLB.511159.14	2.60972	1.12273e-23	hypothetical protein, conserved
TcCLB.510575.239	2.60964	0.00204407	hypothetical protein, conserved
TcCLB.509799.120	2.60456	8.32736e-10	hypothetical protein, conserved
TcCLB.511905.9	2.59784	0.0054882	hypothetical protein, conserved
TcCLB.507949.250	2.59739	1.31187e-80	hypothetical protein, conserved
TcCLB.504069.34	2.59564	8.55646e-12	hypothetical protein, conserved
TcCLB.504173.60	2.59424	4.34645e-22	hypothetical protein, conserved
TcCLB.507793.60	2.59239	1.88128e-06	hypothetical protein, conserved
TcCLB.508909.150	2.59175	8.95981e-11	hypothetical protein, conserved
TcCLB.504021.10	2.57931	2.57127e-26	G1 cyclin CycE4, putative
TcCLB.511759.40	2.57098	3.34935e-11	hypothetical protein, conserved
TcCLB.506679.10	2.56699	1.87451e-09	hypothetical protein, conserved
TcCLB.508257.210	2.56029	3.15206e-24	hypothetical protein, conserved
TcCLB.507063.10	2.54944	3.04709e-11	hypothetical protein
TcCLB.506883.90	2.54679	2.14866e-23	hypothetical protein, conserved
TcCLB.511291.40	2.54662	1.00171e-27	protein kinase, putative
TcCLB.510661.190	2.5443	1.91195e-08	protein kinase, putative
TcCLB.507073.20	2.54076	1.55203e-26	hypothetical protein, conserved
TcCLB.508659.30	2.53961	1.76431e-10	hypothetical protein, conserved
TcCLB.508441.30	2.53651	3.16559e-05	protein kinase, putative
TcCLB.510575.210	2.53445	3.83193e-20	hypothetical protein, conserved
TcCLB.509681.10	2.5337	0.00414617	hypothetical protein, conserved
TcCLB.511755.100	2.53246	1.82199e-05	hypothetical protein, conserved
TcCLB.508909.330	2.5317	2.50354e-26	protein kinase, putative
TcCLB.509991.80	2.52981	3.36288e-13	hypothetical protein, conserved
TcCLB.506619.30	2.52693	3.56034e-05	Flagellar Member 8
TcCLB.503679.30	2.52257	3.24243e-21	hypothetical protein, conserved
TcCLB.509721.20	2.51964	7.9016e-19	hypothetical protein, conserved
TcCLB.458241.10	2.51605	6.52614e-05	hypothetical protein, conserved
TcCLB.508153.740	2.51531	2.28945e-26	hypothetical protein
TcCLB.511909.50	2.51256	1.05597e-15	hypothetical protein, conserved
TcCLB.510221.20	2.5095	3.49349e-12	hypothetical protein, conserved
TcCLB.507519.180	2.5032	1.46651e-33	hypothetical protein, conserved
TcCLB.506425.80	2.50314	3.84808e-14	phosphatidylinositol kinase, putative
TcCLB.511465.20	2.50279	2.48421e-36	hypothetical protein, conserved
TcCLB.506871.120	2.50206	1.97024e-30	hypothetical protein, conserved
TcCLB.510835.10	2.5013	2.63683e-05	hypothetical protein, conserved
TcCLB.506721.30	2.4954	1.1565e-23	calpain-like cysteine peptidase, putative
TcCLB.511269.50	2.49109	2.04425e-05	protein kinase A catalytic subunit 3
TcCLB.511277.554	2.4898	6.71471e-31	hypothetical protein, conserved
TcCLB.508365.80	2.48668	1.47075e-05	hypothetical protein
TcCLB.511257.30	2.48335	3.18543e-13	ras-related protein rab, putative
TcCLB.503939.50	2.47662	6.26599e-15	hypothetical protein, conserved
TcCLB.507031.179	2.47283	1.42105e-06	hypothetical protein, conserved
TcCLB.509525.40	2.47282	0.00290542	hypothetical protein, conserved
TcCLB.508141.70	2.47204	2.30767e-05	Kinesin-13 4, putative
TcCLB.509717.60	2.46379	3.22988e-25	metallo-peptidase, Clan MA(E) Family M41
TcCLB.503723.20	2.46264	1.17702e-14	hypothetical protein, conserved
TcCLB.511283.130	2.46083	1.4378e-13	MEKK-related kinase 1, putative
TcCLB.509791.100	2.45586	3.00291e-22	hypothetical protein, conserved
TcCLB.509243.20	2.45457	0.00219363	hypothetical protein, conserved
TcCLB.511461.30	2.45197	2.32808e-10	hypothetical protein, conserved
TcCLB.506855.300	2.44925	1.02665e-07	hypothetical protein, conserved
TcCLB.510577.30	2.44738	2.11334e-19	hypothetical protein
TcCLB.503431.90	2.44636	9.52637e-18	hypothetical protein, conserved
TcCLB.506475.110	2.44576	1.89621e-14	hypothetical protein
TcCLB.507857.4	2.44092	2.3816e-11	transcription elongation factor, putative
TcCLB.509237.90	2.43563	7.85112e-28	hypothetical protein, conserved
TcCLB.507823.39	2.4323	2.28555e-15	hypothetical protein, conserved
TcCLB.508693.190	2.43057	2.73729e-08	hypothetical protein, conserved
TcCLB.510425.28	2.42639	0.00648389	hypothetical protein, conserved
TcCLB.509287.80	2.42537	3.32135e-30	trans-sialidase, Group VII, putative
TcCLB.508817.170	2.42466	1.00915e-15	hypothetical protein, conserved
TcCLB.508351.30	2.42167	7.78159e-20	hypothetical protein, conserved
TcCLB.511649.30	2.41352	1.36019e-11	hypothetical protein, conserved
TcCLB.509207.80	2.40839	3.57467e-09	glycogen synthase kinase-3 alpha, putative
TcCLB.503635.89	2.40662	8.53608e-11	hypothetical protein, conserved
TcCLB.508919.110	2.40499	0.00650689	hypothetical protein, conserved
TcCLB.503415.30	2.40321	0.000303465	hypothetical protein, conserved
TcCLB.509799.20	2.39992	1.96767e-12	hypothetical protein, conserved
TcCLB.506151.10	2.39778	4.26486e-18	hypothetical protein, conserved
TcCLB.511295.20	2.39768	0.000279108	hypothetical protein, conserved
TcCLB.507517.20	2.39256	1.38399e-21	DNA polymerase sigma-like protein, putative
TcCLB.508641.100	2.39243	2.78788e-22	hypothetical protein, conserved
TcCLB.506009.20	2.39018	3.02483e-29	hypothetical protein, conserved
TcCLB.503415.40	2.39017	0.000847177	hypothetical protein
TcCLB.506319.70	2.38898	0.00716028	hypothetical protein
TcCLB.507723.120	2.38864	0.000337342	U1A small nuclear ribonucleoprotein, putative
TcCLB.451263.9	2.38859	0.00624155	hypothetical protein, conserved
TcCLB.510689.80	2.38755	8.77653e-10	hypothetical protein, conserved
TcCLB.507063.70	2.38748	4.08753e-24	trans-sialidase, Group II, putative
TcCLB.504123.20	2.37478	1.28144e-13	hypothetical protein, conserved
TcCLB.503635.10	2.36641	1.53364e-12	protein kinase, putative
TcCLB.508851.160	2.35747	2.35461e-24	hypothetical protein, conserved
TcCLB.510333.10	2.35637	1.65954e-23	hypothetical protein, conserved
TcCLB.509001.30	2.35543	1.8812e-29	hypothetical protein, conserved
TcCLB.506583.50	2.33992	0.00132102	hypothetical protein, conserved
TcCLB.503693.29	2.33943	8.09281e-27	hypothetical protein
TcCLB.509017.50	2.33574	6.17421e-27	hypothetical protein, conserved
TcCLB.509637.18	2.33279	2.45939e-09	hypothetical protein, conserved
TcCLB.511907.30	2.33251	4.62475e-31	cytoskeleton associated protein, putative
TcCLB.511483.10	2.32448	1.59685e-17	hypothetical protein
TcCLB.503411.10	2.31979	4.01942e-37	hypothetical protein
TcCLB.511667.10	2.31942	0.000203271	hypothetical protein, conserved
TcCLB.511283.240	2.31475	1.01844e-32	hypothetical protein, conserved
TcCLB.506475.100	2.30939	0.0017675	conserved protein, unknown function
TcCLB.511661.20	2.30821	5.14757e-19	hypothetical protein, conserved
TcCLB.506999.180	2.30674	3.29576e-18	hypothetical protein
TcCLB.508909.160	2.30325	2.11568e-08	hypothetical protein, conserved
TcCLB.507063.170	2.29791	0.00044728	hypothetical protein
TcCLB.511909.60	2.2979	2.68595e-09	hypothetical protein, conserved
TcCLB.508153.160	2.29655	1.58367e-06	hypothetical protein, conserved
TcCLB.509569.40	2.29602	6.5083e-32	hypothetical protein, conserved
TcCLB.507063.290	2.29575	4.23e-21	hypothetical protein
TcCLB.510363.90	2.29278	0.00131056	hypothetical protein
TcCLB.511491.40	2.29174	1.2485e-32	hypothetical protein, conserved
TcCLB.507787.40	2.28857	7.7803e-20	hypothetical protein, conserved
TcCLB.508445.90	2.28416	8.15131e-14	hypothetical protein, conserved
TcCLB.508919.94	2.27877	1.41886e-14	hypothetical protein, conserved
TcCLB.506443.20	2.27551	2.37208e-15	hypothetical protein, conserved
TcCLB.507645.30	2.27052	1.55405e-10	hypothetical protein, conserved
TcCLB.506315.40	2.26704	1.30508e-10	hypothetical protein, conserved
TcCLB.508865.4	2.26692	3.98929e-08	protein phosphatase 2C, putative
TcCLB.511261.80	2.26603	3.29978e-12	hypothetical protein, conserved
TcCLB.509509.30	2.25932	1.35875e-19	6-phosphofructo-2-kinase/fructose-2,6-biphosphatase, putative
TcCLB.506587.44	2.25863	6.82453e-08	hypothetical protein
TcCLB.508637.160	2.25812	9.19231e-06	dual specificity protein phosphatase, putative
TcCLB.510657.20	2.2577	0.000305673	ubiquitin hydrolase, putative
TcCLB.511629.20	2.25098	7.77016e-14	hypothetical protein, conserved
TcCLB.503917.7	2.24957	1.07706e-23	RNA-binding protein, putative
TcCLB.508637.40	2.24869	1.09477e-26	hypothetical protein, conserved
TcCLB.511857.20	2.24728	3.57504e-19	hypothetical protein, conserved
TcCLB.506679.80	2.24687	5.04528e-12	SNF1-related protein kinases, putative
TcCLB.511517.160	2.24455	1.25691e-12	hypothetical protein, conserved
TcCLB.504223.10	2.24453	2.12258e-26	amino acid permease, putative
TcCLB.504839.60	2.24363	1.26578e-25	hypothetical protein, conserved
TcCLB.511821.80	2.23997	2.36495e-14	hypothetical protein, conserved
TcCLB.506975.49	2.23989	3.3588e-08	f-actin capping protein beta subunit, putative
TcCLB.508153.680	2.2387	0.00390226	RNA-binding protein 6, putative
TcCLB.511629.10	2.23851	8.12943e-08	hypothetical protein, conserved
TcCLB.511517.30	2.23786	1.65954e-23	hypothetical protein, conserved
TcCLB.508645.20	2.2362	1.24871e-17	hypothetical protein
TcCLB.510359.190	2.22704	1.11404e-14	hypothetical protein, conserved
TcCLB.508819.30	2.22667	3.7529e-15	hypothetical protein, conserved
TcCLB.503413.19	2.22584	3.74027e-05	hypothetical protein
TcCLB.506247.420	2.22554	1.0211e-05	hypothetical protein, conserved
TcCLB.511295.10	2.22413	5.11162e-10	FKBP-type peptidylprolyl cis-trans isomerase, putative
TcCLB.508461.280	2.21636	6.33075e-15	protein kinase A catalytic subunit isoform 2, putative
TcCLB.505183.160	2.21514	3.67584e-09	hypothetical protein, conserved
TcCLB.506871.190	2.21169	1.88285e-05	hypothetical protein
TcCLB.511817.210	2.20911	8.03451e-19	protein kinase, putative
TcCLB.506681.40	2.20836	0.00667643	hypothetical protein, conserved
TcCLB.508797.10	2.20806	8.32264e-11	tubulin-tyrosine ligase-like protein, putative
TcCLB.508153.1000	2.20641	5.44262e-17	hypothetical protein, conserved
TcCLB.508741.110	2.20461	0.00450109	hypothetical protein, conserved
TcCLB.509561.50	2.20234	2.3429e-13	hypothetical protein, conserved
TcCLB.508153.970	2.20137	2.74417e-07	AGC/RSK family serine/threonine kinase, putative
TcCLB.507623.20	2.19973	7.21119e-15	hypothetical protein, conserved
TcCLB.510303.200	2.19904	2.10302e-25	glucosamine-fructose-6-phosphate aminotransferase, putative
TcCLB.511661.70	2.19862	1.48538e-12	hypothetical protein, conserved
TcCLB.511903.90	2.19648	2.99148e-10	hypothetical protein, conserved
TcCLB.510421.180	2.19146	2.33561e-19	casein kinase I, putative
TcCLB.507775.10	2.19133	1.43327e-12	hypothetical protein, conserved
TcCLB.506793.90	2.18858	0.0030512	hypothetical protein, conserved
TcCLB.507889.20	2.18674	1.82457e-09	hypothetical protein, conserved
TcCLB.509029.40	2.18459	7.79752e-22	hypothetical protein, conserved
TcCLB.504251.20	2.18103	5.54484e-08	hypothetical protein, conserved
TcCLB.510577.10	2.18065	0.00462282	hypothetical protein, conserved
TcCLB.508301.10	2.17685	3.97274e-17	hypothetical protein, conserved
TcCLB.510329.380	2.17589	8.03133e-15	hypothetical protein, conserved
TcCLB.507031.110	2.17053	8.01963e-14	hypothetical protein, conserved
TcCLB.507491.119	2.16991	3.33318e-14	hypothetical protein, conserved
TcCLB.511385.110	2.16569	6.91536e-12	hypothetical protein
TcCLB.508859.90	2.16093	5.08243e-09	phosphatidylinositol 3-kinase 2, putative
TcCLB.503703.100	2.16003	9.74446e-18	hypothetical protein, conserved
TcCLB.508645.70	2.15974	2.33186e-10	nucleoside transporter 1, putative
TcCLB.504827.130	2.15818	2.23904e-10	eukaryotic translation initiation factor 4 gamma 4
TcCLB.503583.80	2.15695	3.87331e-14	dual specificity protein phosphatase or MAP kinase phosphatase, putative
TcCLB.511267.20	2.15654	2.99835e-05	hypothetical protein, conserved
TcCLB.508737.80	2.15279	1.08239e-19	mannosyltransferase-like protein, putative
TcCLB.508897.119	2.14939	2.19457e-21	FKBP-type peptidylprolyl cis-trans isomerase, putative
TcCLB.511233.90	2.14505	3.67736e-08	hypothetical protein, conserved
TcCLB.503679.20	2.14307	1.60514e-15	hypothetical protein, conserved
TcCLB.508945.10	2.1385	7.8969e-20	hypothetical protein, conserved
TcCLB.506559.434	2.13643	6.93368e-11	hypothetical protein, conserved
TcCLB.510889.251	2.13642	7.33934e-11	Present in the outer mitochondrial membrane proteome 18
TcCLB.506559.500	2.12767	0.00905398	hypothetical protein, conserved
TcCLB.510329.320	2.12723	2.46386e-12	hypothetical protein, conserved
TcCLB.504253.20	2.12589	5.42321e-19	hypothetical protein, conserved
TcCLB.511649.60	2.12209	1.06074e-06	COP9 signalosome complex subunit 5, putative
TcCLB.507501.30	2.12003	9.38836e-05	hypothetical protein, conserved
TcCLB.508257.30	2.11938	4.64974e-15	hypothetical protein, conserved
TcCLB.503703.10	2.11853	8.29531e-11	hypothetical protein, conserved
TcCLB.503999.100	2.11612	0.000127809	phospholipid-transporting ATPase 1-like protein, putative
TcCLB.511299.60	2.11579	1.0294e-05	hypothetical protein, conserved
TcCLB.511367.180	2.11573	1.58668e-26	hypothetical protein
TcCLB.504021.74	2.11536	1.65979e-10	hypothetical protein, conserved
TcCLB.507951.250	2.11494	4.10848e-08	tRNA isopentenyltransferase, putative
TcCLB.511249.100	2.11308	5.13857e-21	hypothetical protein, conserved
TcCLB.509647.110	2.1119	1.28911e-16	hypothetical protein, conserved
TcCLB.508409.160	2.11145	7.61256e-17	thymine-7-hydroxylase, putative
TcCLB.507159.41	2.10813	1.41872e-05	hypothetical protein, conserved
TcCLB.509025.20	2.10251	0.000323202	hypothetical protein, conserved
TcCLB.506819.49	2.10094	5.98881e-10	hypothetical protein, conserved
TcCLB.507947.10	2.09865	0.000955316	conserved protein, unknown function
TcCLB.509161.130	2.09815	1.52093e-13	ATP- dependent RNA helicase, putative
TcCLB.509331.90	2.09759	1.14342e-21	5'-AMP-activated protein kinase subunit beta, putative
TcCLB.511821.170	2.09756	5.55836e-09	hypothetical protein, conserved
TcCLB.506585.100	2.09666	1.16937e-12	hypothetical protein
TcCLB.510359.290	2.09075	4.18436e-12	hypothetical protein, conserved
TcCLB.508873.20	2.08986	0.00452276	hypothetical protein
TcCLB.510661.240	2.0866	1.01842e-21	hypothetical protein, conserved
TcCLB.510729.140	2.08358	1.64132e-07	NIMA-related kinase, putative
TcCLB.504069.110	2.08322	7.59355e-06	hypothetical protein, conserved
TcCLB.510889.210	2.08102	3.03577e-06	hypothetical protein, conserved
TcCLB.509023.160	2.08018	3.62228e-12	hypothetical protein, conserved
TcCLB.508263.30	2.0799	3.89625e-16	kinesin, putative
TcCLB.507049.66	2.07777	1.29775e-07	hypothetical protein
TcCLB.506915.10	2.0735	1.29527e-19	hypothetical protein, conserved
TcCLB.509733.190	2.0721	0.000419652	hypothetical protein, conserved
TcCLB.509647.80	2.06817	1.62532e-13	hypothetical protein, conserved
TcCLB.507515.90	2.06813	3.32147e-17	hypothetical protein, conserved
TcCLB.509715.130	2.06811	4.6948e-11	hypothetical protein, conserved
TcCLB.510735.40	2.0674	3.60322e-14	hypothetical protein, conserved
TcCLB.511245.240	2.067	2.1574e-14	serine/threonine protein kinase, putative
TcCLB.511017.25	2.06108	0.000368421	hypothetical protein
TcCLB.506201.80	2.06046	6.55863e-25	serine/threonine-protein phosphatase PP1, putative
TcCLB.511823.14	2.05935	0.000350559	hypothetical protein, conserved
TcCLB.503703.30	2.05398	5.18503e-16	hypothetical protein, conserved
TcCLB.510827.10	2.05317	3.04806e-19	hypothetical protein, conserved
TcCLB.503973.110	2.04936	0.00664355	hypothetical protein
TcCLB.506477.60	2.04713	2.15141e-08	protein kinase, putative
TcCLB.508461.310	2.04698	3.66289e-12	protein kinase A catalytic subunit isoform 1, putative
TcCLB.504123.40	2.0457	4.5156e-08	hypothetical protein, conserved
TcCLB.503919.20	2.04531	3.31941e-05	hypothetical protein, conserved
TcCLB.510219.20	2.04262	2.36e-10	hypothetical protein, conserved
TcCLB.509571.60	2.03822	6.33377e-08	hypothetical protein, conserved
TcCLB.468005.9	2.03745	1.95344e-14	pumilio/PUF RNA binding protein 3, putative
TcCLB.508879.160	2.03685	2.97626e-16	hypothetical protein, conserved
TcCLB.509695.50	2.03682	2.26884e-13	katanin, putative
TcCLB.511163.50	2.03657	4.37342e-10	hypothetical protein, conserved
TcCLB.507073.49	2.0343	4.62501e-09	hypothetical protein, conserved
TcCLB.504253.40	2.03393	1.4432e-11	hypothetical protein, conserved
TcCLB.510735.90	2.03344	2.73034e-18	Flagellum attachment zone protein 4
TcCLB.509215.19	2.03226	1.37258e-06	hypothetical protein, conserved
TcCLB.510335.10	2.02881	4.27133e-15	hypothetical protein, conserved
TcCLB.506537.120	2.02878	0.00624155	hypothetical protein, conserved
TcCLB.510155.160	2.02827	6.81263e-27	protein kinase, putative
TcCLB.511821.179	2.0274	3.44162e-05	hypothetical protein, conserved
TcCLB.506721.50	2.02645	0.000489779	hypothetical protein
TcCLB.511511.6	2.02605	0.000539772	zinc finger protein ZFP1
TcCLB.506855.130	2.0259	1.25552e-10	hypothetical protein, conserved
TcCLB.511649.169	2.02587	1.43321e-09	ATP-dependent DEAD/H RNA helicase, putative
TcCLB.509429.260	2.02532	2.46678e-11	hypothetical protein, conserved
TcCLB.508741.280	2.01931	3.75211e-17	ubiquitin-conjugating enzyme E2, putative
TcCLB.506445.20	2.01916	5.69676e-15	Eukaryotic translation initiation factor 4 gamma 2
TcCLB.505193.40	2.01882	1.8686e-11	SUMO1/Ulp2, putative
TcCLB.510007.30	2.01509	0.00876639	RNA-binding protein, putative
TcCLB.511859.80	2.01429	8.21842e-26	hypothetical protein
TcCLB.507681.40	2.01403	2.70537e-17	hypothetical protein
TcCLB.511245.170	2.01337	1.66896e-21	hypothetical protein, conserved
TcCLB.510245.10	2.01214	4.41253e-28	amino acid permease, putative
TcCLB.508577.150	2.01187	0.000930203	hypothetical protein, conserved
TcCLB.508625.50	2.01171	0.00116785	6-phosphofructo-2-kinase/fructose-2,6-bisphosphatas, putative
TcCLB.507053.90	2.01094	9.30224e-14	conserved protein, unknown function
TcCLB.503563.20	2.01067	8.73401e-12	ADG2, putative
TcCLB.511169.29	2.00813	9.83358e-13	tubulin-tyrsoine ligase-like protein, putative
TcCLB.509331.150	2.00739	1.68358e-07	permease-like protein, putative
TcCLB.508957.30	2.00443	7.27577e-11	hypothetical protein, conserved
TcCLB.503729.10	2.0007	7.59247e-08	hypothetical protein, conserved
TcCLB.506509.20	1.9997	4.15476e-07	hypothetical protein, conserved
TcCLB.509671.160	1.99826	3.35047e-10	DNA polymerase epsilon subunit B, putative
TcCLB.506991.10	1.99564	1.71509e-10	hypothetical protein, conserved
TcCLB.507583.60	1.99365	0.000359313	hypothetical protein, conserved
TcCLB.509053.120	1.99279	4.60336e-11	hypothetical protein, conserved
TcCLB.507073.30	1.98791	5.94346e-16	hypothetical protein, conserved
TcCLB.510663.40	1.98741	8.01843e-15	hypothetical protein, conserved
TcCLB.510575.20	1.98415	1.02979e-08	hypothetical protein, conserved
TcCLB.510729.60	1.9832	0.000319027	hypothetical protein, conserved
TcCLB.511657.10	1.97964	1.31214e-09	protein kinase, putative
TcCLB.506177.150	1.9792	7.14746e-07	hypothetical protein, conserved
TcCLB.508815.30	1.97831	2.09372e-10	DNA repair protein, putative
TcCLB.506871.110	1.97777	8.64341e-14	hypothetical protein, conserved
TcCLB.508693.20	1.97686	8.49918e-19	DNA topoisomerase IB, large subunit
TcCLB.415803.10	1.97656	5.02646e-05	hypothetical protein, conserved
TcCLB.504185.20	1.97546	2.15203e-17	hypothetical protein, conserved
TcCLB.511277.610	1.97514	3.06334e-13	surface protease GP63, putative
TcCLB.505183.130	1.97393	1.11309e-18	sugar transporter, putative
TcCLB.506327.80	1.97162	9.25838e-11	serine/threonine protein kinase, putative
TcCLB.510889.100	1.97096	1.90005e-15	hypothetical protein, conserved
TcCLB.506577.170	1.96989	6.60074e-05	hypothetical protein, conserved
TcCLB.508153.420	1.96944	1.18131e-14	hypothetical protein, conserved
TcCLB.511289.50	1.96888	1.76766e-14	mitogen-activated protein kinase 9, putative
TcCLB.506297.230	1.96753	0.00259651	hypothetical protein, conserved
TcCLB.510099.30	1.96667	1.75112e-12	hypothetical protein, conserved
TcCLB.506559.524	1.96618	9.85387e-08	protein phosphatase 2C, putative
TcCLB.510187.390	1.96548	3.61778e-22	Protein kinase domain, putative
TcCLB.504253.50	1.96494	2.19896e-12	hypothetical protein, conserved
TcCLB.509985.30	1.96455	5.32555e-15	hypothetical protein, conserved
TcCLB.510265.80	1.96265	1.55913e-17	hypothetical protein, conserved
TcCLB.511807.160	1.96134	2.96603e-05	hypothetical protein, conserved
TcCLB.503923.10	1.96129	8.38338e-12	hypothetical protein, conserved
TcCLB.506789.270	1.96008	9.1218e-17	hypothetical protein, conserved
TcCLB.507085.140	1.95996	5.76342e-05	mucin TcMUCII, putative
TcCLB.509647.50	1.95905	3.82083e-18	hypothetical protein, conserved
TcCLB.508257.240	1.95872	5.13111e-14	hypothetical protein, conserved
TcCLB.510337.20	1.9575	5.02897e-16	calpain-like cysteine peptidase, putative
TcCLB.506435.10	1.95605	7.05525e-08	hypothetical protein, conserved
TcCLB.511287.100	1.9552	4.09103e-12	hypothetical protein, conserved
TcCLB.506149.10	1.95445	4.61384e-25	folate/pteridine transporter, putative
TcCLB.510689.60	1.95269	2.27854e-15	Double RNA binding domain protein 7
TcCLB.505193.20	1.95207	1.11254e-08	hypothetical protein, conserved
TcCLB.503411.30	1.95067	1.56648e-05	hypothetical protein, conserved
TcCLB.506855.150	1.94796	6.55705e-14	hypothetical protein, conserved
TcCLB.509999.120	1.94767	0.000131718	RNA-binding protein, putative
TcCLB.508625.160	1.94674	6.92769e-12	pumilio/PUF RNA binding protein 1, putative
TcCLB.508411.80	1.94564	8.63558e-12	hypothetical protein, conserved
TcCLB.509937.220	1.94295	0.00260977	protein kinase, putative
TcCLB.504827.70	1.94231	1.03856e-06	hypothetical protein, conserved
TcCLB.511025.80	1.93881	2.40524e-08	hypothetical protein, conserved
TcCLB.511909.30	1.9386	3.90374e-14	hypothetical protein, conserved
TcCLB.504069.100	1.93848	7.56651e-05	RNA polymerase II, putative
TcCLB.503461.20	1.93819	2.45855e-18	per-hexamer repeat protein 5, putative
TcCLB.509937.160	1.93745	3.05919e-19	hypothetical protein, conserved
TcCLB.509791.140	1.93713	1.64639e-11	hypothetical protein, conserved
TcCLB.509741.34	1.93702	4.33173e-06	hypothetical protein, conserved
TcCLB.510519.14	1.93539	1.10727e-06	hypothetical protein, conserved
TcCLB.508479.224	1.93343	4.11072e-12	hypothetical protein, conserved
TcCLB.506041.20	1.9323	1.0687e-06	hypothetical protein, conserved
TcCLB.506303.120	1.93225	5.13111e-14	hypothetical protein, conserved
TcCLB.507743.9	1.93213	2.00496e-12	tyrosine protein kinase, putative
TcCLB.506821.130	1.9318	1.54665e-10	hypothetical protein, conserved
TcCLB.503773.20	1.92977	6.72231e-13	hypothetical protein, conserved
TcCLB.509563.10	1.92953	3.2973e-17	hypothetical protein, conserved
TcCLB.506873.20	1.928	2.77151e-05	hypothetical protein, conserved
TcCLB.506883.100	1.92602	1.77308e-18	GTP-binding protein, putative
TcCLB.506303.30	1.92581	2.55495e-10	hypothetical protein, conserved
TcCLB.507025.60	1.92338	0.00254623	RNA-binding protein, putative
TcCLB.508891.30	1.92151	2.58774e-21	hypothetical protein, conserved
TcCLB.508411.50	1.92127	8.91275e-08	hypothetical protein, conserved
TcCLB.508065.50	1.92098	1.49883e-08	phosphatidylinositol-4-phosphate 5-kinase-like protein, putative
TcCLB.511825.250	1.92045	1.6338e-10	hypothetical protein, conserved
TcCLB.508355.280	1.91885	8.68581e-16	hypothetical protein, conserved
TcCLB.510187.520	1.91668	4.44959e-13	hypothetical protein, conserved
TcCLB.510155.115	1.91556	1.68599e-09	hypothetical protein, conserved
TcCLB.507069.60	1.91415	0.000170558	mucin TcMUCII, putative
TcCLB.503617.10	1.91278	9.38063e-21	protein kinase, putative
TcCLB.508507.20	1.91273	3.74777e-10	hypothetical protein, conserved
TcCLB.506475.105	1.91262	2.46244e-08	hypothetical protein, conserved
TcCLB.503825.19	1.91152	9.33592e-07	protein kinase, putative
TcCLB.507539.49	1.91088	0.000248566	hypothetical protein, conserved
TcCLB.509617.40	1.90861	0.00290542	hypothetical protein, conserved
TcCLB.508689.10	1.90858	2.62828e-13	hypothetical protein, conserved
TcCLB.504105.250	1.90732	1.58902e-08	hypothetical protein
TcCLB.506459.280	1.90553	1.35078e-09	hypothetical protein, conserved
TcCLB.511821.60	1.9048	4.15933e-12	protein kinase, putative
TcCLB.506821.160	1.90246	1.05946e-12	hypothetical protein, conserved
TcCLB.511819.50	1.90173	9.71995e-14	hypothetical protein, conserved
TcCLB.509911.20	1.90167	2.14839e-07	hypothetical protein
TcCLB.506275.60	1.90083	2.67487e-12	metallo-peptidase, Clan MC, Family M14, putative
TcCLB.511511.5	1.90024	0.00131989	hypothetical protein
TcCLB.449759.9	1.89836	0.00545513	hypothetical protein, conserved
TcCLB.510329.220	1.8979	6.93728e-12	hypothetical protein, conserved
TcCLB.504131.80	1.89597	1.81138e-10	hypothetical protein, conserved
TcCLB.508641.170	1.89504	6.19486e-06	protein kinase, putative
TcCLB.511239.10	1.89502	4.93997e-14	hypothetical protein, conserved
TcCLB.508027.80	1.89343	1.96936e-09	hypothetical protein, conserved
TcCLB.511261.90	1.89202	1.94271e-09	hypothetical protein, conserved
TcCLB.508639.10	1.89178	2.97144e-08	trans-sialidase, putative
TcCLB.507851.70	1.88906	4.28165e-05	hypothetical protein
TcCLB.511821.20	1.88894	1.71841e-07	hypothetical protein, conserved
TcCLB.510187.470	1.88808	0.000284032	hypothetical protein
TcCLB.510943.206	1.88736	0.000342928	trans-sialidase, putative
TcCLB.508879.200	1.8871	3.38841e-07	hypothetical protein, conserved
TcCLB.506327.50	1.88413	1.20964e-09	hypothetical protein, conserved
TcCLB.506991.19	1.88336	6.5376e-09	hypothetical protein, conserved
TcCLB.508823.100	1.8819	3.89644e-20	hypothetical protein, conserved
TcCLB.508059.24	1.88143	1.13193e-09	hypothetical protein, conserved
TcCLB.508267.50	1.88121	3.85433e-07	hypothetical protein, conserved
TcCLB.504161.59	1.88038	8.60455e-11	transporter, putative
TcCLB.509571.70	1.87808	6.41766e-06	hypothetical protein, conserved
TcCLB.508613.10	1.87772	0.00015104	hypothetical protein, conserved
TcCLB.510889.190	1.87737	1.28925e-06	hypothetical protein, conserved
TcCLB.510331.10	1.87689	0.000215023	trans-sialidase, Group III, putative
TcCLB.507519.170	1.87604	3.52753e-12	hypothetical protein, conserved
TcCLB.507765.140	1.87523	1.62801e-10	hypothetical protein, conserved
TcCLB.510629.420	1.87365	2.96069e-05	protein phosphatase 1, regulatory subunit, putative
TcCLB.511823.30	1.87303	1.4434e-11	hypothetical protein, conserved
TcCLB.507949.20	1.87265	2.16687e-11	RWD domain-containing protein
TcCLB.509207.120	1.87194	8.39802e-16	hypothetical protein, conserved
TcCLB.510099.50	1.87112	1.39128e-08	hypothetical protein, conserved
TcCLB.509229.70	1.87016	7.37155e-06	hypothetical protein, conserved
TcCLB.508153.150	1.8693	3.03111e-10	hypothetical protein, conserved
TcCLB.506871.70	1.86916	2.2775e-09	hypothetical protein, conserved
TcCLB.511863.30	1.86909	3.25573e-13	Flagellum attachment zone protein 13
TcCLB.506009.30	1.86902	5.44109e-14	TPR-repeat-containing chaperone protein DNAJ, putative
TcCLB.504741.60	1.8678	1.49415e-13	transcription initiation protein, putative
TcCLB.508501.310	1.86474	7.20115e-07	hypothetical protein, conserved
TcCLB.503399.10	1.86274	3.75272e-08	hypothetical protein, conserved
TcCLB.507763.20	1.86273	1.9938e-09	hypothetical protein
TcCLB.507207.10	1.86139	2.01666e-10	hypothetical protein, conserved
TcCLB.511907.240	1.8613	1.41574e-12	protein kinase, putative
TcCLB.506575.70	1.86114	5.13111e-14	Present in the outer mitochondrial membrane proteome 41
TcCLB.467287.10	1.86095	9.75017e-06	alpha-tubulin N-acetyltransferase, putative
TcCLB.511649.160	1.86094	3.26531e-12	hypothetical protein, conserved
TcCLB.509857.40	1.85994	1.06936e-06	hypothetical protein, conserved
TcCLB.511661.120	1.85963	4.18556e-08	protein kinase, putative
TcCLB.509643.100	1.8575	4.06941e-12	hypothetical protein, conserved
TcCLB.509877.50	1.85598	4.50874e-06	glycosomal membrane protein, putative
TcCLB.437575.18	1.85434	0.000328936	transporter, putative
TcCLB.508199.30	1.85434	0.00015104	hypothetical protein, conserved
TcCLB.511817.250	1.85339	4.44707e-08	F-box and WD40 domain containing protein
TcCLB.506793.60	1.85267	2.1604e-09	hypothetical protein, conserved
TcCLB.507029.10	1.85246	1.34147e-08	hypothetical protein, conserved
TcCLB.511821.160	1.8519	0.00997808	microtubial binding protein, putative
TcCLB.506477.20	1.85029	5.72755e-14	vesicular-fusion protein nsf, putative
TcCLB.507515.120	1.84987	5.94982e-10	sphingosine kinase A, B, putative
TcCLB.504069.40	1.84909	1.72808e-07	hypothetical protein, conserved
TcCLB.507491.90	1.84819	5.99256e-10	protein kinase, putative
TcCLB.508821.30	1.84616	5.60019e-14	hypothetical protein
TcCLB.511825.190	1.8433	6.46346e-09	hypothetical protein, conserved
TcCLB.504105.160	1.84235	1.10913e-14	splicing factor ptsr1 interacting protein, putative
TcCLB.508479.140	1.84172	2.0989e-05	hypothetical protein, conserved
TcCLB.506789.170	1.84158	8.11252e-10	ATPase, putative
TcCLB.506229.64	1.84154	0.000228462	conserved protein, unknown function
TcCLB.506175.50	1.84106	9.88745e-14	hypothetical protein, conserved
TcCLB.509001.20	1.83908	1.13823e-10	hypothetical protein, conserved
TcCLB.508707.130	1.83878	5.70314e-05	hypothetical protein, conserved
TcCLB.506585.50	1.83772	8.36427e-13	hypothetical protein, conserved
TcCLB.509901.140	1.83711	3.6881e-13	COP9 signalosome complex subunit 5, putative
TcCLB.508699.60	1.83516	3.56819e-10	hypothetical protein, conserved
TcCLB.510687.90	1.83337	5.29106e-12	hypothetical protein, conserved
TcCLB.508139.130	1.83326	1.69127e-07	trans-sialidase, Group II, putative
TcCLB.506315.60	1.8332	3.28284e-07	hypothetical protein, conserved
TcCLB.511263.50	1.83315	0.00297235	hypothetical protein, conserved
TcCLB.505193.10	1.83266	2.65982e-06	serine/threonine protein phosphatase-like protein, putative
TcCLB.506201.4	1.83194	1.0547e-05	hypothetical protein, conserved
TcCLB.508667.40	1.83117	4.10523e-05	hypothetical protein, conserved
TcCLB.479883.10	1.83011	1.97142e-06	hypothetical protein, conserved
TcCLB.503999.20	1.82928	2.05356e-08	Kinesin-13 5, putative
TcCLB.506139.40	1.82789	2.72944e-06	Mucin-associated surface protein (MASP), subgroup S024
TcCLB.508409.300	1.8253	7.59247e-08	hypothetical protein, conserved
TcCLB.509937.200	1.82467	9.16012e-19	hypothetical protein, conserved
TcCLB.510889.200	1.82445	2.54602e-08	hypothetical protein, conserved
TcCLB.511233.59	1.82433	0.00443846	hypothetical protein, conserved
TcCLB.511277.115	1.82392	1.14482e-14	hypothetical protein, conserved
TcCLB.507541.10	1.82362	1.52494e-08	hypothetical protein, conserved
TcCLB.509561.30	1.82332	4.57331e-05	citrate transporter, putative
TcCLB.509287.230	1.82292	5.41319e-07	trans-sialidase, Group II, putative
TcCLB.509161.120	1.82231	3.20284e-11	hypothetical protein, conserved
TcCLB.507663.20	1.82146	5.12858e-16	hypothetical protein, conserved
TcCLB.510729.230	1.82112	2.0306e-16	hypothetical protein, conserved
TcCLB.506041.60	1.82109	5.06941e-09	hypothetical protein, conserved
TcCLB.511267.24	1.82004	2.50156e-06	hypothetical protein, conserved
TcCLB.508153.1030	1.81716	1.11404e-14	hypothetical protein, conserved
TcCLB.508593.130	1.81711	4.79934e-14	hypothetical protein, conserved
TcCLB.511649.39	1.8171	1.29354e-06	hypothetical protein, conserved
TcCLB.506581.20	1.81683	1.29697e-11	hypothetical protein, conserved
TcCLB.511725.40	1.81572	8.05334e-06	hypothetical protein, conserved
TcCLB.503939.30	1.81401	6.13719e-07	ttaggg binding factor, putative
TcCLB.511725.230	1.81375	1.06133e-14	protein kinase, putative
TcCLB.509663.44	1.81234	0.00612135	hypothetical protein, conserved
TcCLB.506009.100	1.81194	4.5644e-06	ADP-ribosylation factor-like protein, putative
TcCLB.511511.40	1.81159	0.000188757	hypothetical protein, conserved
TcCLB.503847.60	1.81121	9.74761e-08	hypothetical protein, conserved
TcCLB.509229.60	1.80714	1.99081e-14	hypothetical protein, conserved
TcCLB.510663.64	1.80606	4.34802e-09	mitochondrial carrier protein, putative
TcCLB.509179.130	1.80594	1.77389e-11	hypothetical protein, conserved
TcCLB.506559.530	1.80511	1.12809e-08	protein phosphatase 2C, putative
TcCLB.506855.320	1.80438	1.42877e-10	hypothetical protein, conserved
TcCLB.511517.130	1.80413	2.02074e-13	hypothetical protein, conserved
TcCLB.508231.130	1.79852	0.000183275	Cell division control protein 48, putative
TcCLB.508613.50	1.79777	0.00379175	hypothetical protein, conserved
TcCLB.511907.89	1.79682	1.56685e-06	hypothetical protein, conserved
TcCLB.507019.100	1.79522	8.64338e-08	nuclear movement protein, putative
TcCLB.509459.40	1.79363	6.88557e-05	hypothetical protein, conserved
TcCLB.510729.299	1.79284	0.00348175	protein kinase, putative
TcCLB.510187.490	1.79139	1.21825e-05	hypothetical protein, conserved
TcCLB.504741.30	1.79098	3.86232e-06	protein phosphatase 2C, putative
TcCLB.508735.100	1.79081	1.73224e-08	hypothetical protein, conserved
TcCLB.509683.80	1.7899	0.000516146	adenylosuccinate synthetase, putative
TcCLB.508693.199	1.78853	2.11676e-08	hypothetical protein, conserved
TcCLB.508027.120	1.78813	2.55932e-08	hypothetical protein, conserved
TcCLB.503465.40	1.78796	2.25421e-08	hypothetical protein
TcCLB.508871.160	1.78759	0.000996064	hypothetical protein
TcCLB.510901.230	1.78705	3.57109e-12	hypothetical protein, conserved
TcCLB.508855.10	1.78508	2.17232e-07	trans-sialidase, putative
TcCLB.511323.60	1.78474	2.44315e-09	hypothetical protein, conserved
TcCLB.508175.200	1.78404	1.01857e-11	hypothetical protein, conserved
TcCLB.506297.250	1.78392	1.69335e-06	palmitoyl acyltransferase 7, putative
TcCLB.508931.10	1.7839	2.89427e-14	hypothetical protein
TcCLB.511163.24	1.78217	1.35193e-08	hypothetical protein, conserved
TcCLB.511511.150	1.78151	1.12994e-15	sphingosine 1-phosphate lyase, putative
TcCLB.509791.90	1.781	0.000276529	hypothetical protein, conserved
TcCLB.508045.20	1.78092	1.28244e-07	hypothetical protein, conserved
TcCLB.505037.50	1.78083	2.40731e-11	small GTP-binding protein RAB6, putative
TcCLB.511809.90	1.77974	1.98814e-13	hypothetical protein, conserved
TcCLB.506201.70	1.77967	2.62994e-09	serine/threonine-protein phosphatase PP1 alpha
TcCLB.506559.517	1.77942	3.08282e-11	hypothetical protein, conserved
TcCLB.503581.30	1.77938	1.17663e-17	hypothetical protein, conserved
TcCLB.511245.40	1.77832	3.46758e-06	hypothetical protein
TcCLB.506123.30	1.77716	8.63558e-12	protein kinase, putative
TcCLB.507765.20	1.77673	6.55178e-17	PUF nine target 1
TcCLB.511263.30	1.77622	0.0020306	hypothetical protein, conserved
TcCLB.509611.70	1.77613	2.95993e-08	hypothetical protein, conserved
TcCLB.508917.30	1.77604	1.61047e-13	kinesin, putative
TcCLB.505939.65	1.77566	0.000390284	hypothetical protein, conserved
TcCLB.510657.110	1.77546	2.46491e-11	hypothetical protein, conserved
TcCLB.508027.40	1.77391	1.5736e-17	folate/pteridine transporter, putative
TcCLB.506319.20	1.77143	3.67049e-12	hypothetical protein, conserved
TcCLB.508593.100	1.77042	2.30418e-10	hypothetical protein, conserved
TcCLB.510731.40	1.76986	1.01728e-07	katanin, putative
TcCLB.511727.230	1.76913	1.82798e-12	Repressor of differentiation kinase 1, putative
TcCLB.508153.440	1.76857	4.86612e-13	poly(A) polymerase, putative
TcCLB.508601.40	1.76785	3.79545e-06	hypothetical protein, conserved
TcCLB.509569.50	1.76594	8.63558e-12	guanine nucleotide exchange factor subunit GCD7
TcCLB.508669.30	1.76488	1.72896e-06	hypothetical protein
TcCLB.508897.90	1.76467	4.61954e-12	hypothetical protein, conserved
TcCLB.508461.120	1.76438	4.15476e-07	hypothetical protein, conserved
TcCLB.511385.90	1.76435	1.36911e-14	hypothetical protein, conserved
TcCLB.511629.40	1.76431	0.00177928	hypothetical protein, conserved
TcCLB.510359.40	1.76321	1.20182e-08	hypothetical protein, conserved
TcCLB.508043.20	1.76181	3.34782e-05	metallo-beta-lactamase-like protein, putative
TcCLB.509211.10	1.76082	1.38429e-07	hypothetical protein, conserved
TcCLB.508961.40	1.75901	2.0692e-09	hypothetical protein, conserved
TcCLB.506247.310	1.75894	3.77469e-11	hypothetical protein, conserved
TcCLB.506851.10	1.75889	4.84553e-13	NIMA-related kinase, putative
TcCLB.506301.20	1.75766	3.98934e-13	Golgi reassembly stacking protein (GRASP homologue), putative
TcCLB.508119.190	1.75737	2.94838e-09	hypothetical protein, conserved
TcCLB.509429.250	1.75726	7.12409e-11	ubiquitin hydrolase, putative
TcCLB.508153.80	1.75649	3.0242e-06	DNA replication complex GINS protein SLD5, putative
TcCLB.506145.10	1.75408	4.52567e-10	hypothetical protein, conserved
TcCLB.511281.50	1.75297	6.37522e-08	surface protease GP63, putative
TcCLB.507915.10	1.75183	0.00108804	hypothetical protein, conserved
TcCLB.503999.40	1.75166	0.000392449	Spindle assembly abnormal 4
TcCLB.509051.50	1.75116	1.28417e-09	hypothetical protein, conserved
TcCLB.506999.120	1.75106	8.50297e-08	hypothetical protein, conserved
TcCLB.506793.100	1.75019	8.60733e-11	hypothetical protein, conserved
TcCLB.509229.40	1.7492	2.56388e-11	hypothetical protein, conserved
TcCLB.511657.20	1.7491	3.00868e-12	protein kinase, putative
TcCLB.508965.39	1.74854	2.41162e-10	hypothetical protein, conserved
TcCLB.510421.310	1.74841	2.26235e-11	hypothetical protein, conserved
TcCLB.510421.29	1.74691	0.000449274	CAAX prenyl protease 2, putative
TcCLB.505171.40	1.74591	9.66988e-08	hypothetical protein, conserved
TcCLB.507539.40	1.74585	5.03201e-05	cell cycle sequence binding phosphoprotein (RBP33), putative
TcCLB.509253.20	1.7449	3.61543e-10	tubulin tyrosine ligase, putative
TcCLB.511817.80	1.74481	0.000685448	protein kinase, putative
TcCLB.509799.40	1.74381	1.57675e-13	hypothetical protein, conserved
TcCLB.508267.30	1.74235	1.03653e-05	hypothetical protein, conserved
TcCLB.506957.140	1.74231	2.34141e-09	phosphatidylinositol-4-phosphate 5-kinase-like, putative
TcCLB.507895.160	1.74206	3.42805e-06	hypothetical protein, conserved
TcCLB.508495.50	1.74197	0.000892846	mucin TcMUCII, putative
TcCLB.509399.140	1.7412	2.54255e-07	hypothetical protein, conserved
TcCLB.509319.100	1.74112	1.45708e-05	hypothetical protein, conserved
TcCLB.504105.180	1.74099	8.38461e-10	hypothetical protein, conserved
TcCLB.509663.37	1.74089	6.44381e-06	hypothetical protein, conserved
TcCLB.510519.80	1.74071	1.36153e-08	hypothetical protein, conserved
TcCLB.510735.100	1.74006	0.00095063	hypothetical protein, conserved
TcCLB.503791.20	1.73943	0.000562622	hypothetical protein, conserved
TcCLB.503995.20	1.73825	1.9257e-07	hypothetical protein, conserved
TcCLB.504109.30	1.73811	1.20075e-13	hypothetical protein, conserved
TcCLB.506445.10	1.7374	5.5134e-05	actin-like protein, putative
TcCLB.508051.40	1.73726	0.000335446	hypothetical protein, conserved
TcCLB.503879.90	1.73636	1.02774e-10	hypothetical protein, conserved
TcCLB.507895.69	1.73589	1.1418e-07	hypothetical protein, conserved
TcCLB.511245.120	1.73556	1.65027e-06	hypothetical protein, conserved
TcCLB.511651.10	1.73476	0.0022596	ATP-dependent DEAD/H RNA helicase, putative
TcCLB.506459.250	1.73467	0.0045237	hypothetical protein, conserved
TcCLB.506137.10	1.73327	8.74297e-06	surface protease GP63, putative
TcCLB.507951.60	1.73213	2.53393e-09	hypothetical protein, conserved
TcCLB.507991.70	1.73098	1.39302e-08	hypothetical protein, conserved
TcCLB.503917.50	1.73093	0.000672416	hypothetical protein, conserved
TcCLB.508153.140	1.73051	0.000433839	mitogen-activated protein kinase kinase 1
TcCLB.503539.20	1.7303	5.89108e-05	Putative intraflagellar transport protein A1
TcCLB.507025.50	1.72983	0.000546676	RNA-binding protein, putative
TcCLB.506577.130	1.72895	1.44127e-08	protein phosphatase 2A regulatory subunit, putative
TcCLB.503987.50	1.72894	5.28238e-05	hypothetical protein, conserved
TcCLB.506435.370	1.72873	3.716e-08	surface protease GP63, putative
TcCLB.509733.50	1.72732	5.64432e-09	hypothetical protein, conserved
TcCLB.509065.79	1.72727	4.68809e-08	hypothetical protein, conserved
TcCLB.510305.30	1.72697	3.75564e-08	lipin, putative
TcCLB.511383.30	1.72684	5.41266e-07	U1 small nuclear ribonucleoprotein, putative
TcCLB.509215.16	1.72604	8.99944e-06	GlcNAc-PI synthesis protein
TcCLB.503521.10	1.72598	4.6948e-11	hypothetical protein
TcCLB.507209.60	1.72566	2.23523e-09	hypothetical protein, conserved
TcCLB.510945.60	1.72459	1.48987e-09	hypothetical protein, conserved
TcCLB.508119.200	1.72368	4.44076e-12	hypothetical protein
TcCLB.506905.30	1.72364	1.50981e-05	hypothetical protein, conserved
TcCLB.509053.10	1.72219	4.9339e-06	ubiquitin-protein ligase, putative
TcCLB.511283.280	1.72169	1.02031e-05	Serine/threonine-protein kinase Nek1-related, putative
TcCLB.509047.110	1.72127	1.50592e-06	rac serine-threonine kinase, putative
TcCLB.508897.70	1.71943	8.46759e-06	ADP-ribosylation factor family, putative
TcCLB.510901.110	1.7191	7.9589e-09	hypothetical protein, conserved
TcCLB.509561.9	1.71804	0.000420363	FLA1-binding protein
TcCLB.510223.5	1.71795	0.00801704	translation initiation factor eIF2B delta subunit, putative
TcCLB.508543.180	1.71726	2.8784e-05	hypothetical protein, conserved
TcCLB.509713.30	1.71697	4.58487e-25	hypothetical protein, conserved
TcCLB.509799.5	1.71591	0.00875413	hypothetical protein, conserved
TcCLB.511367.240	1.71589	1.06861e-14	PIWI-like protein
TcCLB.506435.100	1.71536	8.13145e-06	hypothetical protein, conserved
TcCLB.506957.120	1.71458	2.57456e-14	hypothetical protein, conserved
TcCLB.510359.30	1.71436	1.22879e-05	hypothetical protein, conserved
TcCLB.503823.30	1.71379	4.23132e-05	hypothetical protein, conserved
TcCLB.506701.29	1.71271	0.000241723	hypothetical protein, conserved
TcCLB.511859.200	1.71268	3.4674e-17	hypothetical protein, conserved
TcCLB.508965.60	1.71194	1.50322e-09	rac serine-threonine kinase, putative
TcCLB.509733.60	1.71168	2.03459e-12	hypothetical protein
TcCLB.506681.70	1.71066	9.91835e-05	serine-threonine dehydratase, putative
TcCLB.506559.250	1.70838	4.04858e-08	hypothetical protein, conserved
TcCLB.511505.30	1.70824	0.000813098	hypothetical protein, conserved
TcCLB.507705.20	1.70822	4.10873e-05	hypothetical protein, conserved
TcCLB.506959.80	1.70744	3.78245e-08	hypothetical protein, conserved
TcCLB.508503.70	1.70736	8.77511e-05	hypothetical protein, conserved
TcCLB.511203.5	1.70719	0.00335724	hypothetical protein, conserved
TcCLB.503721.20	1.7057	3.61036e-06	hypothetical protein, conserved
TcCLB.507081.90	1.70489	5.97856e-07	hypothetical protein, conserved
TcCLB.506275.40	1.70484	1.93032e-05	hypothetical protein, conserved
TcCLB.509339.10	1.7044	0.00153586	hypothetical protein, conserved
TcCLB.507021.50	1.70413	3.31149e-08	kinesin, putative
TcCLB.506559.454	1.70267	6.714e-08	GTP-binding protein, putative
TcCLB.508657.10	1.70195	9.88195e-08	hypothetical protein, conserved
TcCLB.511649.140	1.70185	7.10663e-06	hypothetical protein, conserved
TcCLB.506871.160	1.69921	1.64452e-05	RNA capping enzyme, cytoplasmic
TcCLB.510943.184	1.6985	0.000272241	tyrosine phosphatase, putative
TcCLB.509875.200	1.69703	8.92018e-06	copper homeostasis protein, putative
TcCLB.511287.124	1.69675	9.51513e-08	peroxin 13, putative
TcCLB.509161.100	1.69513	1.54694e-09	hypothetical protein, conserved
TcCLB.511657.70	1.69505	3.40244e-09	hypothetical protein, conserved
TcCLB.509647.60	1.69401	1.38275e-11	hypothetical protein, conserved
TcCLB.503593.30	1.69382	2.97769e-12	hypothetical protein, conserved
TcCLB.507515.140	1.69332	2.27942e-05	oxysterol-binding protein, putative
TcCLB.509629.10	1.69319	5.37128e-16	trans-sialidase, Group III, putative
TcCLB.507017.130	1.69316	0.000109811	hypothetical protein
TcCLB.508815.60	1.69235	1.15354e-05	hypothetical protein, conserved
TcCLB.509859.20	1.69229	0.000431454	hypothetical protein, conserved
TcCLB.511809.10	1.69186	1.78546e-09	hypothetical protein
TcCLB.506295.60	1.69178	8.74482e-06	hypothetical protein, conserved
TcCLB.508981.30	1.69109	0.000161067	hypothetical protein, conserved
TcCLB.506247.370	1.69103	7.6377e-08	hypothetical protein, conserved
TcCLB.511003.80	1.69084	1.09546e-08	hypothetical protein, conserved
TcCLB.508461.130	1.69026	1.57947e-11	elongation factor 1-alpha (ef-1-alpha), putative
TcCLB.508501.220	1.68948	7.43322e-08	hypothetical protein, conserved
TcCLB.508479.320	1.68907	0.00281576	hypothetical protein, conserved
TcCLB.503891.70	1.68902	8.43769e-08	ribonuclease HII, putative
TcCLB.506175.120	1.68866	4.76458e-08	hypothetical protein, conserved
TcCLB.506835.50	1.68799	6.53447e-05	hypothetical protein
TcCLB.506327.40	1.68779	1.61364e-10	hypothetical protein, conserved
TcCLB.506305.29	1.68763	4.75122e-14	hypothetical protein, conserved
TcCLB.508707.320	1.6874	2.07839e-09	hypothetical protein, conserved
TcCLB.503823.120	1.68737	2.46751e-07	hypothetical protein, conserved
TcCLB.509719.80	1.68717	4.9995e-06	hypothetical protein, conserved
TcCLB.509671.172	1.68673	2.87117e-06	hypothetical protein, conserved
TcCLB.463451.10	1.68563	6.6938e-08	hypothetical protein, conserved
TcCLB.508859.20	1.68516	1.54027e-05	hypothetical protein, conserved
TcCLB.504109.120	1.68336	0.00010927	hypothetical protein, conserved
TcCLB.507897.30	1.68313	8.42829e-14	serine/threonine-protein kinase a, putative
TcCLB.507219.9	1.68252	2.64212e-06	trans-sialidase, putative
TcCLB.511817.130	1.67978	0.000292806	hypothetical protein, conserved
TcCLB.509643.40	1.67918	1.12257e-08	hypothetical protein, conserved
TcCLB.507049.41	1.67882	2.40357e-05	hypothetical protein, conserved
TcCLB.508817.119	1.67845	6.04133e-08	hypothetical protein, conserved
TcCLB.509507.49	1.67791	0.000791883	mitotic cyclin, putative
TcCLB.509745.10	1.67734	3.62218e-10	hypothetical protein, conserved
TcCLB.508027.90	1.67518	1.1508e-08	hypothetical protein, conserved
TcCLB.476733.20	1.67394	4.66044e-08	hypothetical protein, conserved
TcCLB.509317.50	1.67352	0.00243227	dolichyl-P-Man:GDP-Man7GlcNAc2-PP-dolichyl alpha-1,6-mannosyltransferase, putative
TcCLB.503693.20	1.67346	0.00336175	hypothetical protein, conserved
TcCLB.508919.80	1.6723	1.05516e-07	hypothetical protein, conserved
TcCLB.507771.40	1.6722	0.000115152	phosphoglycerate mutase, putative
TcCLB.509695.60	1.67056	6.51852e-07	hypothetical protein, conserved
TcCLB.510225.40	1.67044	8.41964e-13	hypothetical protein, conserved
TcCLB.511317.50	1.67038	0.00010606	hypothetical protein, conserved
TcCLB.511481.20	1.67027	0.000572291	hypothetical protein, conserved
TcCLB.510819.20	1.6699	4.07501e-10	hypothetical protein, conserved
TcCLB.467795.19	1.6693	0.000231723	hypothetical protein, conserved
TcCLB.506789.210	1.66883	1.56154e-10	paraflagellar rod protein, putative
TcCLB.511385.60	1.66872	6.22754e-05	hypothetical protein
TcCLB.508693.60	1.66718	6.84399e-05	hypothetical protein, conserved
TcCLB.508543.10	1.66591	2.0197e-11	DNA polymerase sigma, putative
TcCLB.508695.10	1.66512	0.00273474	hypothetical protein, conserved
TcCLB.507081.80	1.665	8.84231e-08	hypothetical protein, conserved
TcCLB.509037.20	1.66464	0.000746562	surface protease GP63, putative
TcCLB.511725.280	1.66389	6.44078e-12	hypothetical protein, conserved
TcCLB.509287.20	1.66195	1.1079e-06	protein kinase, putative
TcCLB.508909.10	1.66152	1.20251e-05	OSM3-like kinesin, putative
TcCLB.508175.280	1.6597	2.60968e-13	hypothetical protein, conserved
TcCLB.510329.370	1.65869	0.000157687	hypothetical protein, conserved
TcCLB.511817.60	1.65788	0.00218965	hypothetical protein, conserved
TcCLB.504161.40	1.65692	4.58004e-08	hypothetical protein, conserved
TcCLB.506011.10	1.65626	9.08627e-19	hypothetical protein, conserved
TcCLB.508173.160	1.65617	5.2844e-13	hypothetical protein, conserved
TcCLB.506679.210	1.65403	5.85142e-11	RNA editing complex protein MP61, putative
TcCLB.506559.364	1.65398	1.71321e-09	hypothetical protein, conserved
TcCLB.507053.130	1.65358	2.45927e-06	hypothetical protein, conserved
TcCLB.506985.60	1.65323	0.000111302	inositol polyphosphate kinase-like protein, putative
TcCLB.509569.150	1.65222	0.00154076	hypothetical protein, conserved
TcCLB.509049.30	1.65131	5.92133e-11	hypothetical protein, conserved
TcCLB.508961.4	1.65021	8.97797e-05	ADP-ribosylation factor, putative
TcCLB.511167.110	1.64997	4.32271e-10	hypothetical protein, conserved
TcCLB.508895.70	1.64939	5.92941e-06	membrane protein, putative
TcCLB.511725.240	1.64932	1.03674e-12	hypothetical protein, conserved
TcCLB.511817.230	1.64801	2.31843e-07	hypothetical protein, conserved
TcCLB.509937.50	1.64709	1.45461e-12	hypothetical protein, conserved
TcCLB.509855.10	1.64357	2.00198e-08	hypothetical protein, conserved
TcCLB.509237.120	1.64278	4.95201e-12	calpain-like cysteine peptidase, putative
TcCLB.506479.100	1.6427	2.66044e-05	hypothetical protein, conserved
TcCLB.510969.30	1.64148	0.000326813	hypothetical protein, conserved
TcCLB.511725.160	1.63967	6.70298e-07	hypothetical protein, conserved
TcCLB.511287.80	1.63955	0.00049885	hypothetical protein, conserved
TcCLB.509607.60	1.63889	0.000133363	hypothetical protein
TcCLB.507951.290	1.63884	7.03755e-05	hypothetical protein, conserved
TcCLB.506855.20	1.63874	3.06777e-09	hypothetical protein, conserved
TcCLB.511825.90	1.6384	0.00235106	hypothetical protein, conserved
TcCLB.511483.20	1.63805	2.31926e-06	hypothetical protein, conserved
TcCLB.507491.130	1.63804	6.28502e-08	hypothetical protein, conserved
TcCLB.508523.50	1.63702	2.26852e-08	trans-sialidase, Group II, putative
TcCLB.509561.39	1.63685	3.01189e-08	hypothetical protein, conserved
TcCLB.508533.50	1.63654	9.00793e-13	hypothetical protein, conserved
TcCLB.510657.130	1.63559	1.45708e-05	hypothetical protein, conserved
TcCLB.507233.110	1.63448	3.86492e-11	mismatch repair protein MSH4, putative
TcCLB.511817.120	1.63385	6.10267e-07	hypothetical protein, conserved
TcCLB.506305.5	1.63264	0.00688158	hypothetical protein, conserved
TcCLB.511491.80	1.63219	8.6582e-07	mitogen-activated protein kinase, putative
TcCLB.511517.90	1.63215	4.18189e-09	hypothetical protein, conserved
TcCLB.467795.9	1.632	6.35254e-06	diphthamide synthesis protein, putative
TcCLB.510659.100	1.63177	0.00149107	hypothetical protein, conserved
TcCLB.508827.110	1.6311	8.6317e-11	leucine-rich repeat protein (LRRP), putative
TcCLB.511261.60	1.63053	4.62094e-09	hypothetical protein, conserved
TcCLB.508059.10	1.62971	0.00181698	hypothetical protein, conserved
TcCLB.509571.40	1.62955	3.2196e-06	hypothetical protein, conserved
TcCLB.440099.28	1.62856	0.000905318	protein kinase, putative
TcCLB.509177.40	1.62821	1.2416e-07	hypothetical protein, conserved
TcCLB.507233.10	1.62781	0.00250148	trans-sialidase, Group III, putative
TcCLB.506275.50	1.62726	8.99944e-06	Golgi SNAP receptor complex member 1, putative
TcCLB.510657.80	1.62614	7.92572e-05	hypothetical protein, conserved
TcCLB.506199.30	1.62585	0.00236211	hypothetical protein, conserved
TcCLB.509937.110	1.62507	1.07585e-07	hypothetical protein, conserved
TcCLB.506709.10	1.62449	2.21878e-05	hypothetical protein, conserved
TcCLB.511501.40	1.62373	0.000310171	hypothetical protein, conserved
TcCLB.504109.60	1.6224	1.57455e-08	hypothetical protein, conserved
TcCLB.508059.40	1.62209	0.00010077	syntaxin, putative
TcCLB.509229.50	1.62142	0.00229366	hypothetical protein
TcCLB.504797.34	1.62126	3.26651e-06	N-acetyltransferase, putative
TcCLB.510579.10	1.62064	2.24866e-05	tyrosine phospatase-like protein, putative
TcCLB.504185.9	1.61932	0.00228745	hypothetical protein, conserved
TcCLB.509029.80	1.61811	1.93673e-10	hypothetical protein
TcCLB.511895.40	1.61782	0.000103558	hypothetical protein
TcCLB.508303.44	1.61722	0.000509893	hypothetical protein, conserved
TcCLB.503919.40	1.61598	9.86112e-08	hypothetical protein, conserved
TcCLB.507053.190	1.61597	6.78866e-08	hypothetical protein, conserved
TcCLB.510901.180	1.61557	0.00447922	hypothetical protein, conserved
TcCLB.510661.174	1.61529	6.63568e-09	riboflavin kinase, putative
TcCLB.507945.10	1.61447	1.39843e-12	ATP-dependent RNA helicase, putative
TcCLB.509561.60	1.61352	7.47203e-05	hypothetical protein, conserved
TcCLB.469735.9	1.61327	8.58406e-06	hypothetical protein, conserved
TcCLB.507027.80	1.61284	2.62572e-06	hypothetical protein, conserved
TcCLB.511717.20	1.61174	2.26467e-07	hypothetical protein, conserved
TcCLB.507019.140	1.61152	0.000257701	CDC16, putative
TcCLB.511491.90	1.61115	5.41028e-06	hypothetical protein
TcCLB.510187.10	1.61007	5.10528e-06	hypothetical protein, conserved
TcCLB.510729.280	1.6098	0.00561467	trans-sialidase, Group III, putative
TcCLB.510941.20	1.60855	1.80004e-05	hypothetical protein, conserved
TcCLB.504209.10	1.60772	0.00140639	conserved protein, unknown function
TcCLB.503657.70	1.60751	2.2315e-10	tyrosine phosphatase, putative
TcCLB.504177.30	1.60732	2.2913e-06	hypothetical protein, conserved
TcCLB.506315.20	1.60618	4.43697e-06	hypothetical protein, conserved
TcCLB.509911.74	1.60519	1.60966e-13	hypothetical protein, conserved
TcCLB.509733.70	1.60451	1.66784e-08	hypothetical protein, conserved
TcCLB.511723.10	1.60283	0.00031988	surface protease GP63, putative
TcCLB.506559.110	1.60263	4.13164e-07	hypothetical protein
TcCLB.508621.10	1.60225	0.00152052	protein kinase, putative
TcCLB.506337.30	1.60213	0.000387846	Charged multivesicular body protein 3, putative
TcCLB.507031.40	1.60201	6.39967e-09	hypothetical protein, conserved
TcCLB.507005.50	1.60182	2.77945e-07	hypothetical protein
TcCLB.504533.50	1.60172	2.02103e-11	hypothetical protein, conserved
TcCLB.510329.120	1.601	9.43035e-08	VIT family, putative
TcCLB.508501.280	1.60074	1.12222e-05	hypothetical protein, conserved
TcCLB.510901.160	1.60061	0.000742904	hypothetical protein, conserved
TcCLB.511763.10	1.59993	7.13692e-06	hypothetical protein, conserved
TcCLB.508153.1070	1.59984	1.5847e-07	hypothetical protein, conserved
TcCLB.510823.30	1.5995	5.08255e-05	Isoprenylcysteine alpha-carbonyl methylesterase, putative
TcCLB.508911.60	1.59947	5.43317e-11	hypothetical protein, conserved
TcCLB.511277.110	1.59932	0.00591058	citrate synthase, putative
TcCLB.506321.320	1.59918	3.07636e-07	suppressive immunomodulating factor, putative
TcCLB.504131.120	1.59898	1.86827e-06	hypothetical protein, conserved
TcCLB.452283.4	1.59873	0.00476812	hypothetical protein, conserved
TcCLB.506315.80	1.59849	1.49608e-09	hypothetical protein, conserved
TcCLB.510519.40	1.59824	0.000143793	protein kinase, putative
TcCLB.511261.130	1.59819	0.000702397	hypothetical protein, conserved
TcCLB.510445.10	1.59776	0.00751345	casein kinase 1 isoform 2, putative
TcCLB.511261.100	1.59762	0.000625355	chaperone DNAJ protein, putative
TcCLB.506679.200	1.59759	2.70294e-06	hypothetical protein, conserved
TcCLB.510329.180	1.5974	0.00749576	hypothetical protein, conserved
TcCLB.507991.50	1.59682	9.43858e-11	kinesin, putative
TcCLB.503573.9	1.59662	1.28906e-05	ATP-binding cassette transporter ABCA1, putative
TcCLB.510901.220	1.59589	3.78402e-07	Flagellum attachment zone protein 20
TcCLB.508303.40	1.59478	1.06113e-05	hypothetical protein, conserved
TcCLB.511761.70	1.59347	0.000525142	hypothetical protein, conserved
TcCLB.508015.10	1.59302	0.00123293	hypothetical protein
TcCLB.509695.80	1.59256	5.98967e-05	hypothetical protein, conserved
TcCLB.505207.10	1.59218	0.00299733	trans-sialidase, Group VII, putative
TcCLB.504157.60	1.59214	4.70901e-05	hypothetical protein, conserved
TcCLB.506559.360	1.59193	5.13888e-07	hypothetical protein, conserved
TcCLB.508405.30	1.59182	2.98211e-07	Suppressor of G2 allele of SKP1, putative
TcCLB.507623.120	1.59174	1.84153e-07	hypothetical protein, conserved
TcCLB.509647.160	1.59091	2.77384e-05	SKP1-like protein
TcCLB.511277.310	1.59085	1.045e-06	hypothetical protein, conserved
TcCLB.511277.500	1.59076	1.94678e-05	hypothetical protein, conserved
TcCLB.508641.180	1.58894	9.04508e-11	RNA-binding protein 38, putative
TcCLB.506559.170	1.58882	3.73312e-09	8-oxoguanine DNA glycosylase, putative
TcCLB.509105.100	1.58663	1.60339e-05	Enriched in surface-labeled proteome protein 15
TcCLB.508503.90	1.58655	0.00136209	hypothetical protein, conserved
TcCLB.506871.20	1.58603	4.2328e-08	hypothetical protein, conserved
TcCLB.509409.10	1.5856	0.000558866	protein kinase, putative
TcCLB.509295.50	1.58487	0.0036262	beta galactofuranosyl glycosyltransferase, putative
TcCLB.510693.200	1.58482	5.69439e-07	mucin TcMUCII, putative
TcCLB.511837.110	1.58449	1.46087e-09	hypothetical protein, conserved
TcCLB.509029.70	1.58409	1.54846e-08	leucine-rich repeat protein, putative
TcCLB.508593.80	1.58399	1.15323e-05	hypothetical protein, conserved
TcCLB.509937.170	1.5838	5.1212e-05	hypothetical protein
TcCLB.508029.30	1.58207	1.12547e-06	ATP dependent DEAD-box helicase, putative
TcCLB.506279.10	1.58193	6.33828e-08	trans-sialidase, Group VI, putative
TcCLB.511865.40	1.58187	4.90508e-12	hypothetical protein, conserved
TcCLB.506509.60	1.58124	1.7658e-05	hypothetical protein, conserved
TcCLB.506855.70	1.58078	4.41485e-06	hypothetical protein, conserved
TcCLB.511301.120	1.58059	2.23675e-08	hypothetical protein, conserved
TcCLB.507053.110	1.57962	6.25919e-10	hypothetical protein, conserved
TcCLB.509569.160	1.57943	1.92181e-07	hypothetical protein, conserved
TcCLB.507519.60	1.57873	2.6076e-07	Silent information regulator 2 related protein 1
TcCLB.508231.210	1.57807	2.67834e-07	hypothetical protein, conserved
TcCLB.507005.80	1.57799	0.00440957	hypothetical protein, conserved
TcCLB.508959.10	1.57681	0.00198825	hypothetical protein, conserved
TcCLB.508815.50	1.57647	3.66672e-08	hypothetical protein, conserved
TcCLB.511633.70	1.57616	4.56337e-06	protein kinase, putative
TcCLB.510967.13	1.57594	0.00348679	hypothetical protein, conserved
TcCLB.511661.100	1.57472	5.68272e-06	protein kinase, putative
TcCLB.508799.30	1.5743	4.67904e-05	hypothetical protein, conserved
TcCLB.508919.70	1.57366	4.28272e-05	protein kinase, putative
TcCLB.510787.10	1.57351	1.27541e-05	trans-sialidase, Group I, putative
TcCLB.510359.90	1.57327	0.00137502	hypothetical protein, conserved
TcCLB.508543.129	1.57318	0.000197182	hypothetical protein, conserved
TcCLB.506679.120	1.57278	0.000171555	hypothetical protein
TcCLB.511277.560	1.57273	0.000791883	synaptotagmin, putative
TcCLB.510667.140	1.57194	0.00263826	ribulose-phosphate 3-epimerase, putative
TcCLB.510885.110	1.57171	4.57331e-05	hypothetical protein, conserved
TcCLB.508153.510	1.57166	7.9985e-05	serine/threonine-protein kinase Nek, putative
TcCLB.510943.198	1.57067	1.14921e-05	hypothetical protein, conserved
TcCLB.508917.20	1.57015	0.00044445	hypothetical protein, conserved
TcCLB.510519.30	1.5701	2.97642e-05	mitochondrial structure specific endonuclease I (SSE-1), putative
TcCLB.509671.84	1.57005	5.78817e-06	hypothetical protein, conserved
TcCLB.503939.10	1.56882	0.000521565	acetyltransferase, putative
TcCLB.507065.70	1.56847	4.2661e-05	mucin TcMUCII, putative
TcCLB.506593.50	1.56828	6.34832e-05	hypothetical protein, conserved
TcCLB.509877.89	1.56791	0.00490328	hypothetical protein, conserved
TcCLB.510329.350	1.56754	1.84089e-05	hypothetical protein, conserved
TcCLB.507005.40	1.56687	0.000142958	zinc finger protein, putative
TcCLB.508879.70	1.56643	2.05331e-05	hypothetical protein, conserved
TcCLB.511249.40	1.56636	0.00177347	hypothetical protein, conserved
TcCLB.510681.20	1.56574	0.00749192	myosin heavy chain kinase A, putative
TcCLB.510421.90	1.56491	1.91051e-05	protein kinase, putative
TcCLB.510305.40	1.56438	0.000395942	hypothetical protein, conserved
TcCLB.506145.20	1.56266	3.05539e-05	hypothetical protein, conserved
TcCLB.505071.140	1.56244	7.36008e-06	protein kinase, putative
TcCLB.509791.60	1.56213	1.43523e-05	Flagellum attachment zone protein 5
TcCLB.508479.280	1.56169	0.00296605	hypothetical protein, conserved
TcCLB.511283.310	1.56035	3.1411e-09	hypothetical protein, conserved
TcCLB.511817.270	1.55813	2.75696e-06	hypothetical protein, conserved
TcCLB.507063.130	1.55713	3.66344e-06	protein kinase, putative
TcCLB.511725.120	1.55693	3.1285e-09	kinetoplast polyadenylation/uridylation factor 2, putative
TcCLB.505193.90	1.5568	3.947e-05	hypothetical protein, conserved
TcCLB.509331.20	1.55666	0.000548871	hypothetical protein, conserved
TcCLB.508737.40	1.55617	4.96099e-05	hypothetical protein
TcCLB.509429.130	1.55559	0.00041181	hypothetical protein, conserved
TcCLB.509911.130	1.55557	3.01497e-08	Flagellum attachment zone protein 14
TcCLB.509747.60	1.55554	3.81635e-07	hypothetical protein, conserved
TcCLB.507063.100	1.55499	3.92451e-09	mitochondrial DNA polymerase beta-PAK, putative
TcCLB.507951.154	1.55445	0.00196053	cytochrome b5, putative
TcCLB.509693.209	1.554	1.1189e-06	mismatch repair protein, putative
TcCLB.508479.230	1.55338	8.4306e-08	peroxin-2, putative
TcCLB.510629.410	1.55256	0.00253315	hypothetical protein, conserved
TcCLB.506511.60	1.55231	4.27795e-08	flavoprotein monooxygenase, putative
TcCLB.511277.180	1.55121	3.11687e-08	hypothetical protein, conserved
TcCLB.508891.40	1.55097	1.88378e-06	hypothetical protein, conserved
TcCLB.509911.40	1.55012	2.53483e-06	hypothetical protein, conserved
TcCLB.509509.40	1.54954	0.000609428	hypothetical protein, conserved
TcCLB.509253.40	1.54952	1.35226e-05	hypothetical protein, conserved
TcCLB.510687.50	1.54811	1.36033e-08	hypothetical protein, conserved
TcCLB.507491.140	1.54781	0.000204326	hypothetical protein, conserved
TcCLB.508899.80	1.54778	3.49063e-06	hypothetical protein, conserved
TcCLB.510305.60	1.54752	2.92795e-07	hypothetical protein, conserved
TcCLB.507895.80	1.54674	1.43097e-07	hypothetical protein, conserved
TcCLB.508637.66	1.54646	0.0012994	hypothetical protein, conserved
TcCLB.508505.30	1.5464	3.40712e-07	hypothetical protein, conserved
TcCLB.508435.60	1.54546	0.00151052	mucin TcMUCII, putative
TcCLB.509053.80	1.54546	7.91531e-05	hypothetical protein, conserved
TcCLB.509611.40	1.5454	0.00176735	hypothetical protein, conserved
TcCLB.503823.20	1.54539	0.000476728	hypothetical protein, conserved
TcCLB.506611.70	1.54437	2.73531e-06	surface protease GP63, putative
TcCLB.503861.50	1.54314	0.000544741	beta galactofuranosyl glycosyltransferase, putative
TcCLB.504741.4	1.54285	0.00261775	hypothetical protein, conserved
TcCLB.510479.30	1.54256	1.66948e-05	hypothetical protein
TcCLB.508881.110	1.54247	0.00150881	GTP-binding protein, putative
TcCLB.509997.60	1.54134	8.59169e-13	hypothetical protein, conserved
TcCLB.508641.110	1.54065	0.000356729	hypothetical protein, conserved
TcCLB.503521.20	1.54063	0.000145248	hypothetical protein, conserved
TcCLB.504243.30	1.54028	7.29117e-10	hypothetical protein, conserved
TcCLB.506009.50	1.54014	1.81546e-05	hypothetical protein, conserved
TcCLB.511815.100	1.54003	0.00353117	hypothetical protein, conserved
TcCLB.509429.170	1.53995	0.000355703	hypothetical protein, conserved
TcCLB.508533.20	1.53947	2.17306e-05	hypothetical protein, conserved
TcCLB.510569.10	1.5384	0.000523429	trans-sialidase, putative
TcCLB.511507.70	1.53837	5.13644e-05	calpain-like cysteine peptidase, putative
TcCLB.510303.70	1.53806	6.07965e-07	hypothetical protein, conserved
TcCLB.510657.150	1.53783	2.79864e-05	hypothetical protein
TcCLB.507515.110	1.53761	0.000705062	hypothetical protein, conserved
TcCLB.509065.170	1.53714	2.20978e-05	hypothetical protein, conserved
TcCLB.510733.40	1.53623	4.19832e-05	hypothetical protein, conserved
TcCLB.509553.10	1.53562	2.71493e-06	hypothetical protein, conserved
TcCLB.510903.20	1.53474	9.81564e-05	hypothetical protein, conserved
TcCLB.507087.70	1.53471	2.46803e-05	hypothetical protein, conserved
TcCLB.511283.140	1.53426	1.06381e-06	hypothetical protein, conserved
TcCLB.504243.10	1.53251	0.0019595	RNA-binding protein, putative
TcCLB.503703.90	1.53213	0.00018845	hypothetical protein, conserved
TcCLB.510187.360	1.53175	2.68553e-08	hypothetical protein, conserved
TcCLB.508547.60	1.53117	0.00118339	hypothetical protein, conserved
TcCLB.506573.50	1.53074	9.75371e-08	hypothetical protein, conserved
TcCLB.509027.24	1.53073	0.00206464	hypothetical protein, conserved
TcCLB.504199.10	1.53068	1.87111e-06	hypothetical protein, conserved
TcCLB.506435.90	1.53059	0.000371293	hypothetical protein, conserved
TcCLB.511461.14	1.53052	0.00739677	glyceraldehyde 3-phosphate dehydrogenase, putative
TcCLB.511909.10	1.53044	1.36547e-09	hypothetical protein, conserved
TcCLB.508045.60	1.52933	3.6179e-05	hypothetical protein, conserved
TcCLB.503657.50	1.52884	0.00359933	hypothetical protein, conserved
TcCLB.506303.100	1.52841	2.01058e-07	hypothetical protein, conserved
TcCLB.506219.10	1.52755	6.39905e-05	hypothetical protein, conserved
TcCLB.511321.20	1.52754	2.07833e-09	hypothetical protein, conserved
TcCLB.508153.590	1.52728	2.81861e-08	hypothetical protein, conserved
TcCLB.506469.30	1.52725	5.28238e-05	protein kinase, putative
TcCLB.410049.20	1.52693	0.000328936	hypothetical protein, conserved
TcCLB.508909.300	1.5268	2.71624e-06	hypothetical protein, conserved
TcCLB.510001.20	1.52647	4.59816e-08	hypothetical protein, conserved
TcCLB.511283.290	1.52601	3.75067e-06	hypothetical protein, conserved
TcCLB.510045.30	1.52588	1.85021e-06	protein kinase, putative
TcCLB.506789.200	1.52583	7.59355e-06	ubiquitin-conjugating enzyme E2, putative
TcCLB.511209.40	1.52549	0.00108305	hypothetical protein, conserved
TcCLB.508641.80	1.52538	1.51357e-06	hypothetical protein, conserved
TcCLB.509569.80	1.52518	0.00068344	hypothetical protein
TcCLB.507053.100	1.52452	8.04796e-05	ubiquitin hydrolase, putative
TcCLB.509027.70	1.52428	8.25558e-06	kinetoplastid kinetochore protein 19, putative
TcCLB.510437.60	1.52341	0.000271726	hypothetical protein, conserved
TcCLB.508461.160	1.52232	1.14761e-08	hypothetical protein, conserved
TcCLB.506445.30	1.5217	1.99938e-09	cation transporter, putative
TcCLB.504131.130	1.52156	0.000340415	hypothetical protein, conserved
TcCLB.507681.180	1.52147	5.67604e-10	hypothetical protein, conserved
TcCLB.506883.34	1.52115	0.000513053	hypothetical protein, conserved
TcCLB.504085.10	1.52059	1.35193e-06	hypothetical protein, conserved
TcCLB.511727.30	1.5205	9.34631e-10	hypothetical protein, conserved
TcCLB.508461.300	1.52018	1.39812e-05	hypothetical protein, conserved
TcCLB.503781.60	1.52004	1.45673e-06	tRNA pseudouridine synthase A, putative
TcCLB.509605.10	1.51977	0.000805442	malonyl-CoA decarboxylase, mitochondrial precursor, putative
TcCLB.511903.10	1.51929	0.00695522	hypothetical protein
TcCLB.508865.30	1.51926	5.32922e-12	immunodominant antigen, putative
TcCLB.508153.1130	1.51889	0.000146383	hypothetical protein
TcCLB.508547.100	1.51791	1.41406e-05	hypothetical protein, conserved
TcCLB.508815.130	1.51784	4.9988e-07	hypothetical protein, conserved
TcCLB.509495.30	1.51643	0.000455661	trans-sialidase, Group I, putative
TcCLB.506327.90	1.51624	1.1938e-06	serine/threonine protein kinase, putative
TcCLB.509733.180	1.51593	0.000129593	adenylate kinase, putative
TcCLB.509213.90	1.51536	0.00105123	hypothetical protein, conserved
TcCLB.511167.50	1.51376	5.11655e-08	hypothetical protein, conserved
TcCLB.503781.50	1.51337	7.43257e-05	hypothetical protein, conserved
TcCLB.504013.70	1.51323	4.95006e-06	Carboxypeptidase-like protein
TcCLB.506975.66	1.51172	0.0078725	hypothetical protein, conserved
TcCLB.511909.70	1.51171	2.86234e-07	hypothetical protein, conserved
TcCLB.510729.20	1.51157	0.000143793	hypothetical protein, conserved
TcCLB.506789.160	1.50859	1.63953e-08	hypothetical protein, conserved
TcCLB.508897.50	1.50811	2.68531e-05	hypothetical protein, conserved
TcCLB.508303.30	1.50762	0.000495175	hypothetical protein, conserved
TcCLB.511279.20	1.50732	1.37258e-06	hypothetical protein, conserved
TcCLB.508175.260	1.50669	1.28006e-07	inorganic polyphosphate/ATP-NAD kinase, putative
TcCLB.507787.150	1.50603	8.57019e-14	hypothetical protein, conserved
TcCLB.507787.130	1.50566	0.000172528	hypothetical protein, conserved
TcCLB.510039.100	1.50434	0.00110904	hypothetical protein, conserved
TcCLB.503541.10	1.50397	6.88975e-05	hypothetical protein, conserved
TcCLB.506425.30	1.50395	0.000214738	hypothetical protein, conserved
TcCLB.510679.70	1.50281	2.07641e-05	lipase, putative
TcCLB.506247.80	1.50279	1.55964e-05	Bromodomain factor 1
TcCLB.506475.130	1.50262	5.48448e-07	hypothetical protein, conserved
TcCLB.506727.110	1.50245	8.52478e-07	hypothetical protein, conserved
TcCLB.508737.130	1.50187	0.00445975	hypothetical protein, conserved
TcCLB.503521.80	1.5017	1.35239e-06	hypothetical protein, conserved
TcCLB.511153.70	1.50152	6.16397e-06	hypothetical protein, conserved
TcCLB.506999.140	1.50139	1.71863e-07	hypothetical protein, conserved
TcCLB.509643.120	1.50081	0.000440621	hypothetical protein, conserved
TcCLB.511661.10	1.50048	7.29405e-06	hypothetical protein, conserved
TcCLB.503797.4	1.50037	0.000212687	hypothetical protein, conserved

## Sheet: Pd-dppf-mpo Downregulated genes
Gene ID	Fold Change	p adj (FDR)	Product Description
TcCLB.510725.40	-7.96579	7.74639e-169	hypothetical protein, conserved
TcCLB.507913.20	-6.3143	4.03527e-69	phosphomevalonate kinase protein, putative
TcCLB.510947.50	-5.53821	3.34347e-122	cyclophilin, putative
TcCLB.508479.370	-5.42178	5.70758e-81	hypothetical protein, conserved
TcCLB.509105.90	-5.21876	1.52258e-109	MRB1-associated protein, putative
TcCLB.511281.40	-4.97984	3.80944e-104	mevalonate-diphosphate decarboxylase, putative
TcCLB.510943.50	-4.9434	2.9448e-161	delta-1-pyrroline-5-carboxylate dehydrogenase, putative
TcCLB.509337.19	-4.7365	2.89175e-28	Mitochondrial pyruvate carrier 1
TcCLB.508501.250	-4.5261	5.49954e-121	UMP-CMP kinase, mitochondrial, putative
TcCLB.504045.60	-4.4977	4.1897e-123	thermostable carboxypeptidase 2, putative
TcCLB.506789.280	-4.24543	2.17403e-153	methylthioadenosine phosphorylase, putative
TcCLB.506201.39	-4.23992	1.0764e-150	25 kDa translation elongation factor 1-beta, putative
TcCLB.509237.10	-4.15729	1.47725e-119	mevalonate kinase, putative
TcCLB.511491.70	-4.15525	1.18094e-105	endosomal integral membrane protein, putative
TcCLB.510445.50	-4.1268	1.1965e-79	S-adenosylmethionine synthetase, putative
TcCLB.508153.820	-4.12394	3.12106e-36	inorganic pyrophosphatase, putative
TcCLB.511229.50	-4.02333	3.82358e-166	S-adenosylhomocysteine hydrolase, putative
TcCLB.506145.30	-3.97408	2.91284e-15	O-6 methyl-guanine alkyl transferase, putative
TcCLB.510153.19	-3.95	1.5442e-56	tricarboxylate carrier, putative
TcCLB.503555.30	-3.91952	5.52179e-105	trypanothione reductase, putative
TcCLB.508577.70	-3.902	1.92259e-53	hypothetical protein
TcCLB.508177.70	-3.88413	1.29358e-50	hypothetical protein
TcCLB.509215.40	-3.88328	5.19175e-73	peptidyl-prolyl cis-trans isomerase, putative
TcCLB.507681.20	-3.80346	5.66631e-103	succinyl-CoA ligase [GDP-forming] beta-chain, putative
TcCLB.507767.10	-3.77504	1.82321e-94	succinyl-CoA ligase [GDP-forming] beta-chain, putative
TcCLB.503925.80	-3.76102	1.22316e-18	CDP-diacylglycerol--inositol 3-phosphatidyltransferase
TcCLB.506297.190	-3.7337	8.95672e-184	pyruvate phosphate dikinase, putative
TcCLB.511289.70	-3.70919	2.96927e-145	Mitochondrial ADP/ATP carrier protein 5, putative
TcCLB.511635.40	-3.68642	1.15547e-66	protein tyrosine phosphatase, putative
TcCLB.503999.10	-3.64112	3.66835e-85	squalene monooxygenase, putative
TcCLB.509945.24	-3.62907	1.08359e-21	hypothetical protein, conserved
TcCLB.511903.40	-3.62133	7.82743e-133	3-hydroxy-3-methylglutaryl-CoA synthase, putative
TcCLB.509065.70	-3.61454	3.0848e-114	glyceraldehyde 3-phosphate dehydrogenase, putative
TcCLB.506727.100	-3.61242	1.13158e-58	enoyl-CoA hydratase/isomerase family protein, putative
TcCLB.511287.49	-3.5935	1.0764e-150	aldo-keto reductase
TcCLB.511261.160	-3.58672	8.01563e-42	pyruvate dehydrogenase E1 component alpha subunit, putative
TcCLB.509065.60	-3.5323	8.9494e-133	glyceraldehyde 3-phosphate dehydrogenase, putative
TcCLB.510571.30	-3.50672	7.17168e-98	actin 1, putative
TcCLB.504839.50	-3.49263	1.06719e-90	nucleosome assembly protein-like protein, putative
TcCLB.508411.10	-3.46995	8.6804e-50	cofilin/actin depolymerizing factor, putative
TcCLB.509799.140	-3.43149	5.93421e-56	L-2-hydroxyglutarate dehydrogenase, mitochondrial, putative
TcCLB.506263.10	-3.41905	1.97299e-89	D-isomer specific 2-hydroxyacid dehydrogenase-protein, putative
TcCLB.507057.40	-3.415	1.3828e-18	hypothetical protein, conserved
TcCLB.510099.120	-3.41022	2.96927e-145	D-isomer specific 2-hydroxyacid dehydrogenase-protein, putative
TcCLB.508821.40	-3.40817	2.76659e-82	hypothetical protein, conserved
TcCLB.509937.20	-3.3586	3.09472e-100	Bifunctional NAD(P)H-hydrate repair enzyme
TcCLB.511283.124	-3.3525	2.26305e-48	mitochondrial carrier protein, putative
TcCLB.508153.164	-3.32553	1.06267e-20	hypothetical protein, conserved
TcCLB.511899.40	-3.30901	3.2087e-117	2-amino-3-ketobutyrate coenzyme A ligase, putative
TcCLB.509715.40	-3.30422	2.0279e-53	fibrillarin, putative
TcCLB.505183.30	-3.27291	3.57081e-118	malic enzyme, putative
TcCLB.504001.20	-3.24788	2.4548e-37	hypothetical protein, conserved
TcCLB.511899.10	-3.24232	1.7975e-59	2-amino-3-ketobutyrate coenzyme A ligase, putative
TcCLB.506559.410	-3.23695	7.82743e-133	hypothetical protein, conserved
TcCLB.506705.50	-3.22911	1.89423e-43	hypothetical protein
TcCLB.503929.79	-3.20331	5.39901e-14	serine-palmitoyl-CoA transferase, putative
TcCLB.504071.40	-3.18815	1.52821e-33	hypothetical protein
TcCLB.510439.50	-3.1794	2.28201e-44	hypothetical protein, conserved
TcCLB.503625.10	-3.17404	4.14773e-43	asparagine synthetase a, putative
TcCLB.450161.10	-3.16073	1.55254e-54	cation transporter, putative
TcCLB.509733.100	-3.1543	2.65157e-103	translation elongation factor 1-beta, putative
TcCLB.507023.20	-3.15219	7.87453e-23	hypothetical protein
TcCLB.508175.370	-3.1365	3.1926e-59	glutamine synthetase, putative
TcCLB.510003.20	-3.09493	1.86395e-57	hypothetical protein, conserved
TcCLB.508909.20	-3.08664	4.64051e-51	GMP reductase
TcCLB.509429.120	-3.06723	2.68932e-25	Mitochondrial SSU ribosomal protein 29, putative
TcCLB.506247.220	-3.06413	7.923e-93	histidine ammonia-lyase, putative
TcCLB.511031.10	-3.0566	4.83044e-19	hypothetical protein, conserved
TcCLB.508799.240	-3.04498	6.31943e-95	metallo-peptidase, Clan MF, Family M17
TcCLB.506821.110	-3.02353	1.07828e-35	hypothetical protein, conserved
TcCLB.504109.140	-3.01074	1.43355e-16	DNA-directed RNA polymerase I subunit, putative
TcCLB.506247.330	-2.99704	4.81219e-91	2,3-bisphosphoglycerate-independent phosphoglycerate mutase, putative
TcCLB.509063.30	-2.95054	1.64706e-43	chaperonin HSP60/CNP60, putative
TcCLB.508971.30	-2.94217	4.70484e-76	lysyl-tRNA synthetase, putative
TcCLB.509253.30	-2.94194	1.18801e-32	3-Beta-hydroxysteroid-delta(8), delta(7)-isomerase, putative
TcCLB.506855.350	-2.93359	1.15666e-17	hypothetical protein
TcCLB.506195.300	-2.92915	8.37267e-53	deoxyhypusine synthase, putative
TcCLB.509207.90	-2.92406	1.5568e-47	pyrroline-5-carboxylate reductase, putative
TcCLB.507609.60	-2.89629	6.95862e-47	inositol-3-phosphate synthase, putative
TcCLB.509505.40	-2.886	1.90541e-30	hypothetical protein, conserved
TcCLB.511025.70	-2.88138	3.06045e-75	chaperonin alpha subunit, putative
TcCLB.507849.50	-2.878	9.31864e-23	cysteine proteinase, putative
TcCLB.510885.30	-2.87404	9.25551e-35	hypothetical protein
TcCLB.507583.20	-2.86481	1.97317e-37	nucleolar protein, putative
TcCLB.508175.90	-2.85797	2.52904e-45	hypothetical protein
TcCLB.511827.50	-2.85669	6.71897e-11	hypothetical protein
TcCLB.507513.50	-2.83331	2.91016e-30	heat shock 70 kDa protein, putative
TcCLB.511167.90	-2.82432	2.41076e-29	14-3-3 protein 2, putative
TcCLB.508461.410	-2.81293	2.4245e-53	T-complex protein 1, eta subunit, putative
TcCLB.509179.100	-2.79895	2.15423e-41	L-galactonolactone oxidase
TcCLB.511761.60	-2.78389	1.05894e-35	hypothetical protein, conserved
TcCLB.511283.184	-2.77876	4.65228e-21	hypothetical protein, conserved
TcCLB.506263.20	-2.77349	1.32821e-58	D-isomer specific 2-hydroxyacid dehydrogenase-protein, putative
TcCLB.506229.30	-2.76973	9.45392e-34	hypothetical protein
TcCLB.506989.100	-2.76864	4.71631e-26	Triple RNA binding domain protein 3
TcCLB.511165.54	-2.76813	5.5072e-26	pterin-4-alpha-carbinolamine dehydratase, putative
TcCLB.508707.40	-2.76631	2.13628e-22	hypothetical protein, conserved
TcCLB.510647.30	-2.74839	6.86803e-41	tryptophanyl-tRNA synthetase, putative
TcCLB.504161.50	-2.74583	7.29604e-18	hypothetical protein, conserved
TcCLB.507517.60	-2.73652	2.48673e-31	ATPase subunit 9, putative
TcCLB.510421.320	-2.73608	2.83483e-39	pyruvate dehydrogenase E1 beta subunit, putative
TcCLB.510663.70	-2.73323	5.80079e-52	6-phosphogluconate dehydrogenase, decarboxylating, putative
TcCLB.511807.64	-2.71948	1.7101e-22	DNA repair protein, putative
TcCLB.509047.10	-2.71607	1.91248e-05	hypothetical protein
TcCLB.467287.30	-2.71571	4.82644e-46	ATPase beta subunit, putative
TcCLB.509793.40	-2.71468	1.19105e-38	kinetoplast-associated protein
TcCLB.506831.40	-2.71449	1.08359e-21	3-hydroxy-3-methylglutaryl-CoA reductase
TcCLB.504797.80	-2.70854	1.5132e-32	endo-beta-N-acetylglucosaminidase, putative
TcCLB.503809.120	-2.70007	1.819e-13	hypothetical protein, conserved
TcCLB.509643.70	-2.69397	6.1743e-33	Archaic translocase of outer membrane 11 kDa subunit, putative
TcCLB.506301.40	-2.6911	1.18853e-23	hypothetical protein, conserved
TcCLB.511237.10	-2.68705	9.16731e-08	thimet oligopeptidase, putative
TcCLB.508153.60	-2.67982	1.41515e-54	Aminopeptidase M1, putative
TcCLB.508741.220	-2.67823	1.68765e-32	hypothetical protein
TcCLB.509053.70	-2.67667	3.9657e-43	p22 protein precursor, putative
TcCLB.510889.120	-2.65956	7.81313e-59	alanine aminotransferase, putative
TcCLB.510819.30	-2.65816	2.51622e-38	hypothetical protein
TcCLB.506275.20	-2.62778	4.19697e-40	ATP-dependent protease subunit HslV, putative
TcCLB.510889.231	-2.61967	4.89642e-14	ATP synthase subunit, putative
TcCLB.509051.40	-2.61541	3.88793e-35	adenosine kinase, putative
TcCLB.510889.140	-2.60872	8.37537e-57	alanine aminotransferase, putative
TcCLB.506247.40	-2.59797	6.14892e-27	hypothetical protein, conserved
TcCLB.507031.64	-2.59637	5.44262e-17	hypothetical protein, conserved
TcCLB.509045.29	-2.59393	0.00144258	kinesin, putative
TcCLB.503603.10	-2.59162	4.94642e-17	mitochondrial RNA binding complex 1 subunit, putative
TcCLB.506263.30	-2.58338	1.33672e-10	D-isomer specific 2-hydroxyacid dehydrogenase-protein, putative
TcCLB.506629.30	-2.57996	2.56657e-33	guide RNA-binding protein of 21 kDa
TcCLB.507081.130	-2.57866	3.0019e-83	2,4-dihydroxyhept-2-ene-1,7-dioic acid aldolase, putative
TcCLB.510001.10	-2.56663	2.88401e-39	hypothetical Zinc-finger containing protein
TcCLB.509717.90	-2.55505	1.12374e-48	short chain 3-hydroxyacyl-CoA dehydrogenase, putative
TcCLB.510299.50	-2.54992	4.65932e-36	GPI alpha-mannosyltransferase III
TcCLB.507583.30	-2.54815	1.0808e-17	hypothetical protein
TcCLB.508707.200	-2.54553	1.57268e-70	Nucleoside diphosphate kinase 1
TcCLB.506585.40	-2.54421	2.38505e-99	glucose-regulated protein 78, putative
TcCLB.508173.100	-2.54086	4.35739e-48	Monooxygenase, putative
TcCLB.510121.40	-2.54027	9.22107e-16	hypothetical protein
TcCLB.506585.80	-2.53888	1.86178e-29	hypothetical protein, conserved
TcCLB.506581.10	-2.53839	7.84366e-23	dolicholphosphate-mannose synthase
TcCLB.509179.70	-2.53751	4.69979e-12	hypothetical protein, conserved
TcCLB.508899.54	-2.53747	9.46853e-51	hypothetical protein, conserved
TcCLB.508153.1020	-2.53691	1.15401e-18	hypothetical protein, conserved
TcCLB.508901.10	-2.53611	2.11334e-19	hypothetical protein, conserved
TcCLB.508351.40	-2.53357	1.25914e-17	cytochrome c oxidase assembly factor, putative
TcCLB.508693.50	-2.52746	1.88328e-80	amidinotransferase, putative
TcCLB.505999.90	-2.52662	3.80416e-33	phosphoglycerate kinase, putative
TcCLB.507583.70	-2.52649	3.32167e-10	ribonuclease inhibitor, putative
TcCLB.510301.10	-2.52405	2.33856e-43	fructose-bisphosphate aldolase, glycosomal, putative
TcCLB.508479.340	-2.50938	9.26122e-53	succinyl-CoA synthetase alpha subunit, putative
TcCLB.507649.70	-2.50546	9.25409e-69	nucleolar RNA-binding protein, putative
TcCLB.508897.110	-2.50265	5.87598e-26	macrophage infectivity potentiator, precursor, putative
TcCLB.507645.59	-2.49928	9.14402e-13	hypothetical protein, conserved
TcCLB.511893.10	-2.49301	1.00197e-30	ribonuclease inhibitor, putative
TcCLB.511025.110	-2.49298	5.1149e-65	dihydrolipoyl dehydrogenase, putative
TcCLB.509161.20	-2.49265	9.60753e-16	hypothetical protein, conserved
TcCLB.508899.140	-2.48956	2.02537e-17	hypothetical protein
TcCLB.508173.40	-2.48599	2.39514e-53	mercaptopyruvate sulfurtransferase, putative
TcCLB.510821.60	-2.4838	1.10633e-63	ribonucleoprotein p18, mitochondrial precursor, putative
TcCLB.510687.120	-2.47943	6.48803e-19	snoRNP protein GAR1, putative
TcCLB.511151.100	-2.47194	6.63869e-32	Unconventional myosin
TcCLB.506443.70	-2.46805	1.9301e-47	glutathione-S-transferase/glutaredoxin, putative
TcCLB.510667.10	-2.46513	2.68045e-20	hypothetical protein, conserved
TcCLB.508907.10	-2.46494	1.66692e-07	hypothetical protein, conserved
TcCLB.509235.20	-2.46451	7.15553e-34	C-5 sterol desaturase, putative
TcCLB.511287.150	-2.46222	3.86994e-26	fibrillarin, putative
TcCLB.503735.20	-2.45212	2.12208e-17	hypothetical protein
TcCLB.506297.10	-2.45146	1.32462e-25	hypothetical protein
TcCLB.506559.350	-2.45076	8.7951e-64	asparaginyl-tRNA synthetase, putative
TcCLB.511279.60	-2.44017	9.96276e-52	hypothetical protein, conserved
TcCLB.509875.260	-2.44002	1.22133e-19	hypothetical protein, conserved
TcCLB.510187.290	-2.4381	1.66664e-38	ATP-dependent DEAD/H RNA helicase, putative
TcCLB.507705.30	-2.43724	8.64625e-11	hypothetical protein, conserved
TcCLB.510889.10	-2.4344	4.04282e-12	hypothetical protein, conserved
TcCLB.510355.220	-2.43389	0.000121767	GDP-mannose transporter, putative
TcCLB.511755.10	-2.43191	9.17607e-21	hypothetical protein, conserved
TcCLB.509319.90	-2.42959	2.00215e-39	trypanothione synthetase
TcCLB.510265.10	-2.42702	5.85345e-34	quinone oxidoreductase, putative
TcCLB.507951.80	-2.42417	1.26492e-25	Present in the outer mitochondrial membrane proteome 25
TcCLB.509541.19	-2.42374	5.56454e-28	major vault protein, putative
TcCLB.508257.10	-2.41698	4.22452e-06	serine-palmitoyl-CoA transferase, putative
TcCLB.510729.80	-2.4122	9.24701e-29	Mitochondrial import receptor subunit ATOM40, putative
TcCLB.503945.10	-2.40529	3.91107e-16	eukaryotic translation initiation factor 1A, putative
TcCLB.507951.114	-2.39781	1.41633e-29	High mobility group protein TDP1
TcCLB.507951.170	-2.3966	2.33144e-20	ADP-ribosylation factor-like protein 3, putative
TcCLB.508737.210	-2.39585	2.71282e-65	Mitochondrial outer membrane protein porin, putative
TcCLB.510121.100	-2.392	3.62976e-07	hypothetical protein
TcCLB.506177.100	-2.38678	1.26638e-20	actyltransferase-like, putative
TcCLB.506559.370	-2.38405	2.70562e-12	hypothetical protein, conserved
TcCLB.507583.40	-2.38297	1.77007e-40	hypothetical protein, conserved
TcCLB.510339.54	-2.38175	8.82368e-34	hypothetical protein, conserved
TcCLB.509795.89	-2.38136	3.30754e-13	phosphoprotein lepp12, putative
TcCLB.506123.10	-2.37911	3.64305e-13	major vault protein, putative
TcCLB.508909.214	-2.365	6.77097e-33	hypothetical protein, conserved
TcCLB.507913.30	-2.35563	1.00203e-33	proliferative cell nuclear antigen (PCNA), putative
TcCLB.510301.20	-2.3538	1.45608e-40	fructose-bisphosphate aldolase, glycosomal, putative
TcCLB.509045.20	-2.35336	1.0381e-10	co-chaperone GrpE, putative
TcCLB.503465.30	-2.34865	8.46773e-11	Iron-sulfur assembly protein 2, putative
TcCLB.506975.9	-2.34724	3.9889e-06	REL2, putative
TcCLB.508707.310	-2.34712	4.42511e-07	leucine rich repeat protein, putative
TcCLB.431357.10	-2.33732	8.05554e-05	3,2-trans-enoyl-CoA isomerase, mitochondrial precursor, putative
TcCLB.506959.64	-2.33359	1.82526e-20	3-keto-dihydrosphingosine reductase
TcCLB.508479.180	-2.3313	4.49942e-32	hypothetical protein, conserved
TcCLB.505939.10	-2.32796	1.5736e-05	hypothetical protein
TcCLB.508891.60	-2.32542	6.85294e-12	serine/threonine protein phosphatase, putative
TcCLB.510667.80	-2.32518	4.62605e-17	hypothetical protein, conserved
TcCLB.508851.180	-2.31542	2.76931e-28	14-3-3 protein 1, putative
TcCLB.509065.120	-2.3152	4.82477e-08	hypothetical protein
TcCLB.511277.150	-2.31093	1.65279e-23	hypothetical protein
TcCLB.511815.40	-2.30999	1.37184e-37	guide RNA associated protein, GAP2, putative
TcCLB.509179.20	-2.30922	6.64926e-19	Macro domain containing protein, putative
TcCLB.506627.100	-2.3089	2.66872e-17	hypothetical protein, conserved
TcCLB.511021.90	-2.30792	5.71791e-15	hypothetical protein
TcCLB.507513.110	-2.3078	3.04626e-19	hypothetical protein
TcCLB.509873.10	-2.30358	6.6594e-16	retrotransposon hot spot (RHS) protein, putative
TcCLB.506619.10	-2.30193	2.46241e-25	sedoheptulose-1,7-bisphosphatase, putative
TcCLB.508269.60	-2.29691	1.62776e-13	exosome-associated protein 4, putative
TcCLB.510339.74	-2.29576	0.00141044	mitochondrial carrier protein, putative
TcCLB.503815.29	-2.29528	2.08167e-08	hypothetical protein, conserved
TcCLB.422921.20	-2.29172	3.48402e-05	50S ribosomal protein L17, putative
TcCLB.504131.140	-2.28359	2.74178e-33	hypothetical protein, conserved
TcCLB.503995.50	-2.28211	1.78961e-36	oligopeptidase b
TcCLB.509059.50	-2.28184	3.91071e-38	pyridoxal kinase, putative
TcCLB.510945.30	-2.28117	8.72e-23	actin, putative
TcCLB.511895.69	-2.28019	1.03701e-14	C-5 sterol desaturase, putative
TcCLB.508741.229	-2.27916	5.88591e-56	Mitochondrial outer membrane protein porin, putative
TcCLB.503939.20	-2.27803	1.6561e-25	hypothetical protein, conserved
TcCLB.510187.60	-2.2779	3.26777e-29	glyceraldehyde 3-phosphate dehydrogenase, cytosolic, putative
TcCLB.510817.60	-2.27366	3.79841e-32	hypothetical protein, conserved
TcCLB.504105.150	-2.26938	4.16813e-31	importin beta-1 subunit, putative
TcCLB.506727.40	-2.26571	1.57041e-07	hypothetical protein, conserved
TcCLB.511229.70	-2.25903	6.25301e-10	hypothetical protein, conserved
TcCLB.507017.4	-2.25323	3.1616e-07	hypothetical protein, conserved
TcCLB.509509.20	-2.25187	3.21812e-17	C-1-tetrahydrofolate synthase, cytoplasmic, putative
TcCLB.504949.30	-2.25044	1.57159e-17	succinate dehydrogenase iron-sulfur subunit
TcCLB.511719.30	-2.24892	2.08959e-14	hypothetical protein, conserved
TcCLB.508823.90	-2.2489	2.1536e-25	hypothetical protein
TcCLB.509109.130	-2.24516	1.06819e-12	protein tyrosine phosphatase-like protein, putative
TcCLB.511291.120	-2.24443	4.22184e-14	DNA-directed RNA polymerase III subunit C11, putative
TcCLB.508637.140	-2.23965	0.00633584	hypothetical protein, conserved
TcCLB.508173.180	-2.23717	1.29754e-23	mRNA transport regulator MTR2, putative
TcCLB.508409.110	-2.23654	5.60326e-24	hypothetical protein, conserved
TcCLB.507991.40	-2.22797	4.38535e-19	hypothetical protein
TcCLB.506443.40	-2.22659	4.43482e-17	Mitochondrial pyruvate carrier 2
TcCLB.506295.130	-2.22112	7.10143e-32	prohibitin, putative
TcCLB.506725.20	-2.22059	3.88551e-33	hypothetical protein, conserved
TcCLB.510187.70	-2.21986	4.75025e-41	tyrosine aminotransferase, putative
TcCLB.509461.60	-2.21774	1.12621e-21	mitochondrial RNA binding protein, putative
TcCLB.506835.40	-2.21667	5.76093e-10	hypothetical protein, conserved
TcCLB.507023.50	-2.21499	1.69478e-15	hypothetical protein, conserved
TcCLB.506175.10	-2.21231	8.59169e-13	hypothetical protein, conserved
TcCLB.510065.30	-2.21163	8.37537e-57	translationally controlled tumor protein (TCTP), putative
TcCLB.510155.180	-2.20914	7.43181e-24	Eukaryotic initiation factor 4A-1
TcCLB.508707.70	-2.20544	6.64439e-30	hypothetical protein, conserved
TcCLB.507031.29	-2.20543	1.06804e-26	nucleosome assembly protein, putative
TcCLB.506247.450	-2.2026	3.3909e-17	hypothetical protein, conserved
TcCLB.508153.640	-2.20218	1.10728e-29	inosine-adenosine-guanosine-nucleosidehydrolase, putative
TcCLB.511655.20	-2.20201	2.73504e-13	hypothetical protein, conserved
TcCLB.509561.70	-2.20157	4.53664e-29	hypothetical protein, conserved
TcCLB.506421.10	-2.19963	5.60692e-19	retrotransposon hot spot (RHS) protein, putative
TcCLB.510339.80	-2.19855	7.74127e-30	hypothetical protein, conserved
TcCLB.504933.30	-2.19596	9.63696e-34	hypothetical protein
TcCLB.510657.90	-2.19541	2.73937e-16	hypothetical protein, conserved
TcCLB.509261.30	-2.19112	5.80932e-25	3,2-trans-enoyl-CoA isomerase, mitochondrial precursor, putative
TcCLB.511367.60	-2.18936	1.99485e-34	Lupus La protein homolog, putative
TcCLB.506819.10	-2.18629	2.89549e-08	hypothetical protein, conserved
TcCLB.509611.100	-2.18342	1.31044e-11	lipoate-protein ligase, putative
TcCLB.511249.44	-2.18123	0.000361453	vacuolar transporter chaperone, putative
TcCLB.507029.30	-2.18022	8.28784e-60	heat shock 70 kDa protein, mitochondrial precursor, putative
TcCLB.508693.80	-2.17905	2.1157e-19	ruvB-like DNA helicase, putative
TcCLB.506959.60	-2.17804	2.21531e-13	hypothetical protein, conserved
TcCLB.510519.110	-2.17681	0.00127441	hypothetical protein
TcCLB.508461.140	-2.17412	0.000209217	poly(A)-binding protein, putative
TcCLB.510155.20	-2.16793	9.66532e-20	KREL1
TcCLB.507519.140	-2.16601	1.70078e-23	Adenine phosphoribosyltransferase, putative
TcCLB.509601.100	-2.16532	1.88522e-18	hypothetical protein, conserved
TcCLB.509161.140	-2.16412	1.66723e-16	hypothetical protein, conserved
TcCLB.503809.110	-2.16228	3.82956e-17	phosphatidic acid phosphatase protein, putative
TcCLB.508815.120	-2.16082	6.33795e-17	hypothetical protein, conserved
TcCLB.510395.10	-2.15983	2.84645e-41	ATP synthase F1, alpha subunit, putative
TcCLB.510039.64	-2.15848	4.50733e-14	hypothetical protein, conserved
TcCLB.511239.110	-2.15352	8.35714e-34	hypothetical protein, conserved
TcCLB.509109.120	-2.15346	6.75316e-27	protein tyrosine phosphatase, putative
TcCLB.503917.14	-2.15257	4.14775e-15	hypothetical protein, conserved
TcCLB.504131.180	-2.15237	8.94125e-39	ATPase subunit 9, putative
TcCLB.507777.20	-2.15223	5.23951e-18	hypothetical protein, conserved
TcCLB.511287.90	-2.15209	1.1063e-23	ribosome biogenesis protein, putative
TcCLB.506679.60	-2.15023	5.47388e-17	hypothetical protein, conserved
TcCLB.507061.30	-2.14952	1.78669e-17	iron superoxide dismutase A, mitochondrial
TcCLB.509461.90	-2.14891	2.26771e-32	inositol 1,4,5-trisphosphate receptor, putative
TcCLB.509611.170	-2.14603	9.02434e-17	hypothetical protein, conserved
TcCLB.504069.90	-2.14523	9.05161e-17	centromere/microtubule binding protein cbf5, putative
TcCLB.508707.227	-2.14469	1.72481e-09	ATP binding protein-like protein, putative
TcCLB.503583.60	-2.14449	2.64303e-11	hypothetical protein
TcCLB.507023.150	-2.1442	1.03808e-06	hypothetical protein
TcCLB.509229.130	-2.14192	1.25482e-10	hypothetical protein, conserved
TcCLB.509033.80	-2.14114	3.10244e-29	hypothetical protein, conserved
TcCLB.509463.30	-2.13837	2.62884e-34	3-ketoacyl-CoA thiolase, putative
TcCLB.506435.460	-2.13608	2.49554e-10	hypothetical protein
TcCLB.507063.260	-2.13576	0.000203797	hypothetical protein
TcCLB.508413.5	-2.13293	1.47443e-07	hypothetical protein, conserved
TcCLB.506621.60	-2.1313	3.32241e-20	acyl-CoA binding protein, putative
TcCLB.507665.30	-2.1287	6.44109e-34	ferric reductase transmembrane protein, putative
TcCLB.506957.130	-2.12421	2.17786e-19	hypothetical protein, conserved
TcCLB.507897.40	-2.12306	2.08743e-12	acetyl-CoA carboxylase, putative
TcCLB.509795.20	-2.1208	1.72896e-06	hypothetical protein, conserved
TcCLB.511827.30	-2.11643	4.13567e-13	hypothetical protein
TcCLB.511719.10	-2.11637	2.13336e-19	phosphatidylinositol 3-related kinase, putative
TcCLB.511717.80	-2.11619	1.21248e-16	DNA repair and recombination helicase protein PIF4, putative
TcCLB.508503.20	-2.11385	2.77151e-38	cytochrome c oxidase subunit V, putative
TcCLB.510437.40	-2.11209	2.92418e-36	cytosolic malate dehydrogenase, putative
TcCLB.509471.30	-2.10574	2.38836e-15	hypothetical protein, conserved
TcCLB.506297.260	-2.10533	1.14406e-42	Lanosterol 14-alpha demethylase
TcCLB.507057.30	-2.10394	2.73467e-10	arginine N-methyltransferase, type I
TcCLB.510421.130	-2.10254	1.10435e-29	mitochondrial RNA binding complex 1 subunit, putative
TcCLB.506247.50	-2.10097	2.91493e-50	T-complex protein 1, theta subunit, putative
TcCLB.511389.40	-2.09759	7.89743e-32	hypothetical protein, conserved
TcCLB.508799.170	-2.09694	2.77179e-24	3-methylcrotonoyl-CoA carboxylase beta subunit, putative
TcCLB.507943.10	-2.09589	7.34255e-09	histone H4, putative
TcCLB.507519.164	-2.09485	8.85651e-10	hypothetical protein, conserved
TcCLB.509693.80	-2.09389	5.13721e-13	hypoxanthine-guanine phosphoribosyltransferase, putative
TcCLB.507943.20	-2.09216	8.46281e-09	histone H4, putative
TcCLB.506235.20	-2.092	1.56516e-25	guide RNA associated protein 1, putative
TcCLB.510689.30	-2.08942	6.32695e-24	proteasome beta 7 subunit, putative
TcCLB.511807.256	-2.08676	7.49386e-14	hypothetical protein, conserved
TcCLB.453445.10	-2.08371	7.33831e-28	hypothetical protein, conserved
TcCLB.511003.130	-2.08322	1.94379e-16	hypothetical protein, conserved
TcCLB.508911.50	-2.08322	6.19964e-12	fructosamine kinase, putative
TcCLB.511903.290	-2.07943	7.30115e-20	hypothetical protein, conserved
TcCLB.509799.90	-2.07861	6.20462e-18	hypothetical protein, conserved
TcCLB.511515.40	-2.07843	8.70342e-37	heat shock 70 kDa protein, mitochondrial precursor, putative
TcCLB.506247.210	-2.07727	9.45733e-41	hypothetical protein, conserved
TcCLB.511907.50	-2.07716	3.02483e-29	lysophospholipase, putative
TcCLB.508301.20	-2.07693	7.7845e-19	mitochondrial processing peptidase, beta subunit, putative
TcCLB.509319.40	-2.07524	5.89102e-17	hypothetical protein, conserved
TcCLB.510187.320	-2.07427	1.07147e-17	hypothetical protein
TcCLB.506629.50	-2.07342	1.41864e-25	hypothetical protein, conserved
TcCLB.511727.140	-2.0725	3.23447e-38	phenylalanyl-tRNA synthetase alpha chain, putative
TcCLB.504021.60	-2.07249	1.51404e-08	hypothetical protein, conserved
TcCLB.511837.80	-2.06926	1.26739e-17	hypothetical protein, conserved
TcCLB.506201.110	-2.06702	1.05392e-13	hypothetical protein, conserved
TcCLB.505163.30	-2.06683	1.01729e-12	hypothetical protein, conserved
TcCLB.511021.51	-2.06413	1.28037e-11	hypothetical protein, conserved
TcCLB.510435.20	-2.06328	2.68488e-16	hypothetical protein, conserved
TcCLB.509717.80	-2.06296	1.74922e-29	glyceraldehyde 3-phosphate dehydrogenase, cytosolic, putative
TcCLB.509437.70	-2.06254	2.44854e-35	hypothetical protein, conserved
TcCLB.511725.250	-2.06232	7.30524e-34	chaperonin containing t-complex protein, putative
TcCLB.507053.20	-2.06169	1.4843e-14	hypothetical protein, conserved
TcCLB.509937.150	-2.06098	1.07002e-26	serine hydroxymethyltransferase, putative
TcCLB.507943.30	-2.05562	5.8939e-19	histone H4, putative
TcCLB.511391.180	-2.05548	8.33202e-19	Golgi/lysosome glycoprotein 1, putative
TcCLB.509647.120	-2.05339	1.55106e-12	hypothetical protein
TcCLB.510445.40	-2.05126	2.9705e-05	hypothetical protein
TcCLB.503681.20	-2.04347	2.58046e-25	ethanolamine phosphotransferase, putative
TcCLB.511383.40	-2.03902	1.47374e-15	eukaryotic translation initiation factor 4 gamma 3
TcCLB.509229.80	-2.03832	5.16544e-30	mitochondrial processing peptidase alpha subunit, putative
TcCLB.509733.170	-2.03678	1.28144e-32	Valosin-containing protein, putative
TcCLB.506977.70	-2.03157	1.8475e-24	ATPase subunit 9, putative
TcCLB.510901.200	-2.02964	2.05936e-28	differentiation inhibitory kinase, putative
TcCLB.507541.20	-2.02891	9.89362e-19	hypothetical protein, conserved
TcCLB.506295.100	-2.02424	4.93101e-28	hypothetical protein, conserved
TcCLB.506321.280	-2.02059	1.0902e-34	hypothetical protein, conserved
TcCLB.511301.44	-2.02032	2.29216e-16	hypothetical protein, conserved
TcCLB.507517.30	-2.01858	8.01415e-10	hypothetical protein, conserved
TcCLB.505171.60	-2.01735	1.13846e-22	hypothetical protein, conserved
TcCLB.503471.10	-2.01702	6.29412e-29	protein tyrosine phosphatase, putative
TcCLB.507053.170	-2.0161	1.5114e-14	hypothetical protein, conserved
TcCLB.508821.50	-2.01464	6.764e-20	vacuolar type h+ ATPase subunit, putative
TcCLB.510669.9	-2.01357	1.8538e-06	hypothetical protein, conserved
TcCLB.508459.18	-2.0129	0.000136977	phosphatidylserine decarboxylase, putative
TcCLB.510299.10	-2.01289	1.0927e-19	hypothetical protein, conserved
TcCLB.508479.213	-2.01148	8.50881e-08	hypothetical protein, conserved
TcCLB.506727.90	-2.01105	1.28997e-18	enoyl-CoA hydratase/isomerase family protein, putative
TcCLB.506999.90	-2.01021	1.70225e-27	rieske iron-sulfur protein, mitochondrial precursor, putative
TcCLB.508981.20	-2.01009	3.55178e-10	hypothetical protein, conserved
TcCLB.508355.210	-2.00929	1.318e-07	hypothetical protein, conserved
TcCLB.507765.149	-2.00417	8.41699e-20	hypothetical protein, conserved
TcCLB.508299.20	-2.00371	3.83378e-12	hypothetical protein, conserved
TcCLB.511755.19	-2.00249	9.41486e-13	hypothetical protein, conserved
TcCLB.508737.100	-2.00125	9.26199e-28	ATP-dependent Clp protease subunit, heat shock protein 78, putative
TcCLB.508153.1040	-1.99687	1.59289e-14	hypothetical protein, conserved
TcCLB.507717.20	-1.99682	5.21963e-13	hypothetical protein
TcCLB.510901.10	-1.99667	2.16857e-11	hypothetical protein, conserved
TcCLB.506443.60	-1.99377	2.10251e-12	hypothetical protein
TcCLB.509429.310	-1.99187	4.54169e-08	hypothetical protein, conserved
TcCLB.509505.10	-1.99027	2.17963e-17	protein disulfide isomerase, putative
TcCLB.474937.9	-1.98993	1.92736e-12	acetyl-CoA carboxylase
TcCLB.510359.170	-1.98939	2.61875e-29	AAA ATPase, putative
TcCLB.425785.18	-1.9886	0.0011522	hypothetical protein, conserved
TcCLB.504045.114	-1.98774	1.84796e-05	hypothetical protein, conserved
TcCLB.510823.80	-1.98444	5.05756e-18	cytoplasmic l-asparaginase i-like protein, putative
TcCLB.507053.40	-1.98361	1.5723e-22	hypothetical protein, conserved
TcCLB.503565.10	-1.98281	3.77914e-08	hypothetical protein
TcCLB.506297.280	-1.98261	3.14392e-09	hypothetical protein, conserved
TcCLB.511245.140	-1.98134	1.65525e-18	fatty acid elongase, putative
TcCLB.508479.350	-1.97975	2.09342e-10	eukaryotic translation initiation factor 3 subunit j
TcCLB.504069.80	-1.97967	9.05899e-10	ATP synthase F1 subunit gamma protein, putative
TcCLB.509179.110	-1.97596	5.5843e-14	hypothetical protein, conserved
TcCLB.510943.20	-1.97343	0.000328936	hypothetical protein
TcCLB.504575.15	-1.97329	3.12887e-05	ubiquinol-cytochrome-C-reductase, putative
TcCLB.505183.100	-1.97317	2.9953e-10	hypothetical protein, conserved
TcCLB.508153.920	-1.97259	3.74614e-20	choline/ethanolamine phosphotransferase, putative
TcCLB.506201.100	-1.9721	3.05389e-11	hypothetical protein, conserved
TcCLB.503563.10	-1.96946	2.85622e-08	calcium-translocating P-type ATPase, putative
TcCLB.511209.10	-1.96858	6.12978e-29	Vacuolar proton pump subunit B, putative
TcCLB.508817.80	-1.9674	4.50733e-14	protein kinase, putative
TcCLB.506201.154	-1.96582	3.34935e-11	hypothetical protein, conserved
TcCLB.507823.20	-1.9652	6.14952e-12	hypothetical protein
TcCLB.507021.60	-1.96511	1.17238e-13	p1/s1 nuclease, putative
TcCLB.509611.30	-1.96478	1.94666e-10	hypothetical protein
TcCLB.507049.100	-1.96462	4.2634e-11	mitochondrial RNA binding protein, putative
TcCLB.507951.280	-1.96288	3.79967e-11	ABC transporter, putative
TcCLB.506629.220	-1.95976	5.18354e-18	isovaleryl-coA dehydrogenase, putative
TcCLB.504105.140	-1.95955	2.03521e-53	enolase
TcCLB.506485.80	-1.95826	1.30756e-28	oxidoreductase, putative
TcCLB.509795.40	-1.95784	3.06334e-13	Mechanosensitive ion channel MscS, putative
TcCLB.506583.30	-1.9572	4.67642e-14	ubiquitin-like protein, putative
TcCLB.511847.50	-1.9566	9.74427e-17	hypothetical protein, conserved
TcCLB.510355.269	-1.95539	1.74785e-07	cytochrome b5, putative
TcCLB.504079.6	-1.95318	1.31612e-16	selenophosphate synthetase, putative
TcCLB.507681.60	-1.95275	5.1859e-10	hypothetical protein, conserved
TcCLB.503721.39	-1.95219	1.63743e-15	heat shock 70 kDa protein, putative
TcCLB.511277.70	-1.95141	4.24199e-21	Elongation factor Tu, mitochondrial, putative
TcCLB.508479.274	-1.94995	4.74171e-16	hypothetical protein, conserved
TcCLB.507663.60	-1.94876	1.09984e-08	hypothetical protein, conserved
TcCLB.509331.210	-1.94769	7.56228e-30	NADP-dependent alcohol hydrogenase, putative
TcCLB.508909.270	-1.94313	2.72554e-11	hypothetical protein, conserved
TcCLB.506559.200	-1.94112	3.23273e-21	thioredoxin, putative
TcCLB.506247.400	-1.94058	0.000156021	hypothetical protein, conserved
TcCLB.509105.130	-1.93762	1.77646e-19	ATP-binding cassette sub-family F member 1, putative
TcCLB.504141.9	-1.93699	0.000213204	calcium-translocating P-type ATPase, putative
TcCLB.503929.10	-1.93564	4.02986e-22	V-type ATPase, A subunit, putative
TcCLB.508461.84	-1.93509	1.36604e-12	hypothetical protein
TcCLB.506507.10	-1.93411	3.19128e-29	N-acetylglucosamine-6-phosphate deacetylase-like protein, putative
TcCLB.510187.280	-1.93081	9.53959e-12	hypothetical protein, conserved
TcCLB.509471.95	-1.93043	3.29657e-12	histone H3, putative
TcCLB.506297.240	-1.93017	2.78709e-21	protein transport protein SEC61 subunit alpha, putative
TcCLB.510899.59	-1.92754	5.66261e-18	hypothetical protein, conserved
TcCLB.503687.30	-1.92705	6.04576e-13	hypothetical protein, conserved
TcCLB.509601.20	-1.92666	1.5467e-06	hypothetical protein, conserved
TcCLB.509859.40	-1.92615	2.63352e-18	cytosolic leucyl aminopeptidase, putative
TcCLB.510339.50	-1.92614	3.76292e-26	spermidine synthase, putative
TcCLB.511301.70	-1.92597	4.87822e-28	FK506-binding protein (FKBP)-type peptidyl-prolyl isomerase, putative
TcCLB.506839.70	-1.92584	1.02862e-12	NADH dehydrogenase, putative
TcCLB.511459.50	-1.92559	6.17032e-12	hypothetical protein, conserved
TcCLB.507005.4	-1.92401	6.66878e-06	acyl transferase-like protein
TcCLB.511909.40	-1.92314	1.44496e-30	Succinate dehydrogenase [ubiquinone] flavoprotein subunit, mitochondrial
TcCLB.508153.810	-1.92143	1.80104e-06	hypothetical protein, conserved
TcCLB.503465.49	-1.91965	2.46641e-12	mitochondrial processing peptidase, beta subunit, putative
TcCLB.511165.50	-1.91746	3.58381e-07	PA domain containing protein, putative
TcCLB.503913.10	-1.91494	2.68578e-08	hypothetical protein, conserved
TcCLB.508707.110	-1.91305	1.51049e-05	hypothetical protein, conserved
TcCLB.509795.30	-1.91229	5.81496e-17	hypothetical protein, conserved
TcCLB.509717.100	-1.91174	8.9284e-17	membrane-bound acid phosphatase 2, putative
TcCLB.509047.40	-1.91171	3.09857e-26	hypothetical protein, conserved
TcCLB.509695.10	-1.90955	2.54079e-11	aspartyl-tRNA synthetase, putative
TcCLB.511283.200	-1.90927	7.86635e-20	hypothetical protein, conserved
TcCLB.507681.250	-1.90913	2.4406e-11	hypothetical protein, conserved
TcCLB.432867.20	-1.9076	5.68272e-06	hypothetical protein, conserved
TcCLB.508153.990	-1.90636	8.24431e-16	hypothetical protein, conserved
TcCLB.510731.68	-1.90563	1.77491e-07	hypothetical protein, conserved
TcCLB.503681.9	-1.90457	7.97773e-15	hypothetical protein, conserved
TcCLB.506355.130	-1.90319	3.0624e-11	hypothetical protein, conserved
TcCLB.507681.90	-1.90168	1.96468e-14	hypothetical protein, conserved
TcCLB.508355.160	-1.90049	4.29607e-17	hypothetical protein, conserved
TcCLB.507241.39	-1.89973	1.67795e-19	ABC transporter, putative
TcCLB.511725.100	-1.8962	1.41389e-11	phosphatidylinositol-4-phosphate 5-kinase, putative
TcCLB.506559.380	-1.89617	1.13315e-13	centrin, putative
TcCLB.508881.54	-1.89561	3.30866e-13	hypothetical protein, conserved
TcCLB.509671.10	-1.89497	8.35765e-27	hypothetical protein, conserved
TcCLB.510901.60	-1.89469	2.55353e-25	Replication factor A protein 1
TcCLB.511653.40	-1.89414	1.00413e-08	hypothetical protein, conserved
TcCLB.511233.40	-1.89413	3.7168e-14	hypothetical protein, conserved
TcCLB.507019.40	-1.89396	7.94905e-24	histidyl-tRNA synthetase
TcCLB.511507.60	-1.89373	1.32973e-06	hypothetical protein
TcCLB.507017.40	-1.89298	7.11649e-30	2-hydroxy-3-oxopropionate reductase, putative
TcCLB.511019.90	-1.89281	3.75335e-28	iron superoxide dismutase, putative
TcCLB.506977.60	-1.89142	6.09966e-11	hypothetical protein, conserved
TcCLB.510155.100	-1.8913	1.51033e-16	hypothetical protein
TcCLB.508443.60	-1.88974	3.65101e-15	hypothetical protein, conserved
TcCLB.508677.80	-1.88939	1.85979e-25	NADP-dependent alcohol hydrogenase, putative
TcCLB.509899.110	-1.88932	2.6786e-16	orotidine-5-phosphate decarboxylase/orotate phosphoribosyltransferase, putative
TcCLB.507601.160	-1.88887	4.85849e-17	histone H4, putative
TcCLB.508865.10	-1.88765	6.91448e-15	glutathione synthetase, putative
TcCLB.510329.270	-1.88744	1.35331e-16	Fumarate hydratase class I, cytosolic
TcCLB.506241.200	-1.88635	5.11143e-15	hypothetical protein, conserved
TcCLB.510359.270	-1.88626	1.50249e-16	mitochondrial RNA-binding protein 2, putative
TcCLB.510667.50	-1.88507	2.13126e-08	hypothetical protein, conserved
TcCLB.506789.120	-1.88419	6.31769e-19	hypothetical protein, conserved
TcCLB.507021.40	-1.8839	6.63136e-11	hypothetical protein, conserved
TcCLB.510889.205	-1.88369	3.14297e-10	hypothetical protein, conserved
TcCLB.511865.80	-1.88278	0.0008668	hypothetical protein, conserved
TcCLB.509509.50	-1.88165	8.16793e-08	hypothetical protein, conserved
TcCLB.509289.30	-1.88164	6.74242e-17	hypothetical protein, conserved
TcCLB.503763.10	-1.88048	5.93941e-05	retrotransposon hot spot (RHS) protein, putative
TcCLB.508153.760	-1.87992	3.77469e-11	hypothetical protein, conserved
TcCLB.506559.510	-1.87992	1.28417e-09	hypothetical protein, conserved
TcCLB.510337.40	-1.8796	1.25758e-24	spermidine synthase, putative
TcCLB.506559.450	-1.87926	2.49984e-08	hypothetical protein
TcCLB.508017.10	-1.87865	0.00744451	hypothetical protein, conserved
TcCLB.426435.9	-1.87843	7.80515e-10	fatty acid desaturase, putative
TcCLB.507081.20	-1.878	1.97763e-08	hypothetical protein, conserved
TcCLB.509487.4	-1.87599	0.00532986	DNA-directed RNA polymerase III, putative
TcCLB.507943.5	-1.87579	0.000147622	histone H4, putative
TcCLB.510889.170	-1.87477	9.16012e-19	hypothetical protein, conserved
TcCLB.508857.160	-1.87455	1.45672e-10	threonine synthase, putative
TcCLB.504797.20	-1.87426	1.39704e-05	hypothetical protein, conserved
TcCLB.508641.200	-1.87393	2.45066e-18	hypothetical protein, conserved
TcCLB.509239.10	-1.87227	2.1543e-24	fatty acid desaturase, putative
TcCLB.507943.40	-1.87219	1.78491e-16	histone H4, putative
TcCLB.506337.160	-1.87145	4.86597e-16	NADH-ubiquinone oxidoreductase complex I subunit, putative
TcCLB.508741.170	-1.87028	8.65559e-37	glycerate kinase, putative
TcCLB.509617.20	-1.86898	7.23081e-38	paraflagellar rod protein 3, putative
TcCLB.507723.100	-1.86747	6.60482e-27	cytochrome oxidase subunit IX, putative
TcCLB.505163.80	-1.86696	1.04279e-28	oligosaccharyl transferase subunit, putative
TcCLB.503463.10	-1.86589	0.000847177	protein kinase C substrate protein, heavy chain, putative
TcCLB.506921.20	-1.86475	1.52635e-07	hypothetical protein, conserved
TcCLB.511903.120	-1.86471	1.9332e-35	transketolase, putative
TcCLB.506975.40	-1.86395	2.93752e-18	amidohydrolase, putative
TcCLB.509749.10	-1.86312	6.51727e-15	Biotin--acetyl-CoA-carboxylase ligase, putative
TcCLB.508173.260	-1.86234	8.86021e-14	hypothetical protein, conserved
TcCLB.510825.10	-1.86156	8.82176e-09	hypothetical protein, conserved
TcCLB.505939.30	-1.85998	6.88803e-14	hypothetical protein, conserved
TcCLB.508355.40	-1.8598	6.11935e-05	choline/carnitine O-acetyltransferase, putative
TcCLB.508027.110	-1.85819	2.88297e-15	pyroglutamyl-peptidase I, putative
TcCLB.511229.39	-1.85661	7.96765e-07	hypothetical protein, conserved
TcCLB.511389.130	-1.85651	1.05304e-10	diphthine synthase, putative
TcCLB.509065.150	-1.85496	6.68382e-09	hypothetical protein, conserved
TcCLB.511207.10	-1.85428	5.22967e-08	hypothetical protein, conserved
TcCLB.508457.30	-1.85373	4.67904e-05	lipoic acid containing carrier protein, putative
TcCLB.507623.129	-1.85284	8.90154e-12	vacuolar type h+ ATPase subunit, putative
TcCLB.506469.40	-1.85178	0.000847959	hypothetical protein, conserved
TcCLB.510647.20	-1.85051	4.56279e-10	hypothetical protein, conserved
TcCLB.510421.80	-1.85003	2.52039e-05	hypothetical protein
TcCLB.507019.60	-1.84701	1.16905e-12	hypothetical protein, conserved
TcCLB.507649.80	-1.84513	2.16231e-16	nucleolar RNA-binding protein, putative
TcCLB.507569.10	-1.84478	5.99421e-18	hypothetical protein, conserved
TcCLB.507063.144	-1.84459	3.59738e-10	hypothetical protein, conserved
TcCLB.508177.120	-1.84453	4.81842e-34	cystathionine beta-synthase
TcCLB.511523.10	-1.84441	6.4578e-06	GTPase activating protein of Rab-like GTPase, putative
TcCLB.507031.80	-1.84408	3.93855e-16	hypothetical protein, conserved
TcCLB.511823.70	-1.84377	1.94087e-11	farnesyl pyrophosphate synthase
TcCLB.509793.10	-1.84374	2.11436e-13	kinetoplast-associated protein 4
TcCLB.511629.30	-1.84366	2.19715e-08	hypothetical protein, conserved
TcCLB.507663.40	-1.84362	1.64452e-05	hypothetical protein, conserved
TcCLB.509915.60	-1.84038	5.00942e-11	retrotransposon hot spot (RHS) protein, putative
TcCLB.507053.200	-1.83958	4.74639e-10	hypothetical protein, conserved
TcCLB.509539.30	-1.83915	3.65877e-06	fatty acid elongase, putative
TcCLB.510007.70	-1.83904	3.0327e-11	ATP-dependent zinc metallopeptidase, putative
TcCLB.508851.170	-1.83887	9.95696e-13	DNA topoisomerase III, putative
TcCLB.511257.10	-1.83857	2.47168e-13	DNAK protein, putative
TcCLB.508441.80	-1.83755	2.33372e-14	Mitochondrial-processing peptidase subunit alpha
TcCLB.506123.40	-1.83579	1.25258e-22	nucleolar RNA helicase II, putative
TcCLB.508173.84	-1.83293	1.5114e-14	hypothetical protein, conserved
TcCLB.508027.70	-1.83122	1.48314e-11	ATP-dependent RNA helicase, putative
TcCLB.504231.10	-1.83121	3.16929e-12	hypothetical protein, conserved
TcCLB.507897.20	-1.82961	7.42606e-27	squalene synthase, putative
TcCLB.509213.120	-1.82957	1.17076e-38	cytosolic nonspecific dipeptidase, putative
TcCLB.507601.150	-1.82834	9.33576e-17	histone H4, putative
TcCLB.508405.90	-1.82662	8.84231e-08	soluble N-ethylmaleimide sensitive factor (NSF) attachment protein, putative
TcCLB.509237.130	-1.82628	3.82751e-24	cytoskeleton-associated protein CAP5.5, putative
TcCLB.508815.80	-1.82559	2.06388e-22	hypothetical protein, conserved
TcCLB.504013.55	-1.82471	6.70499e-05	hypothetical protein, conserved
TcCLB.510421.220	-1.82462	1.99563e-14	hypothetical protein, conserved
TcCLB.506835.10	-1.82294	1.54751e-09	hypothetical protein, conserved
TcCLB.506709.20	-1.8229	1.39826e-13	hypothetical protein, conserved
TcCLB.508909.200	-1.82258	7.73929e-05	hypothetical protein
TcCLB.511725.134	-1.82222	3.24454e-10	mitochondrial carrier protein, putative
TcCLB.506905.50	-1.8216	1.33247e-32	cystathionine beta-synthase
TcCLB.511511.159	-1.82121	8.76777e-13	zinc finger protein, putative
TcCLB.509663.10	-1.8209	5.20394e-09	myosin heavy chain, putative
TcCLB.460127.30	-1.81951	0.00305663	amino acid permease, putative
TcCLB.508355.127	-1.81899	6.83617e-09	hypothetical protein, conserved
TcCLB.509875.204	-1.81834	7.17696e-07	hypothetical protein, conserved
TcCLB.511821.110	-1.8183	2.48489e-13	translation initiation factor IF-2, putative
TcCLB.506559.10	-1.81675	2.98231e-07	hypothetical protein
TcCLB.508851.59	-1.81648	2.69824e-14	ATP synthase, putative
TcCLB.508525.30	-1.81564	4.33135e-15	hypothetical protein, conserved
TcCLB.511249.10	-1.81409	1.80179e-16	ADP/ATP mitochondrial carrier protein, putative
TcCLB.508349.30	-1.81395	2.99141e-16	hypothetical protein, conserved
TcCLB.510657.40	-1.81329	1.65966e-08	hypothetical protein, conserved
TcCLB.508579.10	-1.81317	3.78898e-08	hypothetical protein, conserved
TcCLB.506425.40	-1.81264	5.4389e-25	hypothetical protein, conserved
TcCLB.506201.120	-1.81258	2.95324e-12	hypothetical protein, conserved
TcCLB.509329.9	-1.81109	1.5847e-07	retrotransposon hot spot (RHS) protein, putative
TcCLB.503727.29	-1.81082	1.90429e-07	hypothetical protein
TcCLB.511019.120	-1.80845	5.70945e-12	hypothetical protein, conserved
TcCLB.510131.40	-1.80796	3.17112e-24	haloacid dehalogenase-like hydrolase, putative
TcCLB.504253.10	-1.80777	5.50866e-16	hypothetical protein, conserved
TcCLB.506977.80	-1.80752	3.58821e-22	hypothetical protein, conserved
TcCLB.508577.140	-1.80668	1.59289e-14	cyclophilin, putative
TcCLB.510303.180	-1.80641	2.52163e-17	hypothetical protein, conserved
TcCLB.508273.70	-1.80583	5.6489e-06	hypothetical protein, conserved
TcCLB.509937.210	-1.80433	1.40702e-17	hypothetical protein, conserved
TcCLB.511465.30	-1.80405	1.0404e-06	hypothetical protein, conserved
TcCLB.509715.120	-1.80261	1.06017e-08	phosphatidylinositol-4-phosphate 5-kinase, putative
TcCLB.506999.170	-1.80252	3.25065e-11	hypothetical protein
TcCLB.510967.20	-1.80242	2.22986e-10	hypothetical protein, conserved
TcCLB.511153.100	-1.80191	8.13936e-10	RNA-binding protein, putative
TcCLB.507615.70	-1.80147	8.18267e-14	deoxyhypusine hydroxylase, putative
TcCLB.507801.19	-1.801	2.363e-09	dynein heavy chain, putative
TcCLB.506629.40	-1.80024	1.33573e-13	hypothetical protein, conserved
TcCLB.507681.70	-1.79954	2.92462e-15	hypothetical protein, conserved
TcCLB.506989.150	-1.79764	3.13123e-09	hypothetical protein, conserved
TcCLB.511159.30	-1.79697	9.63585e-06	Present in the outer mitochondrial membrane proteome 15
TcCLB.509799.60	-1.79584	4.25223e-13	hypothetical protein, conserved
TcCLB.506219.40	-1.79534	1.06904e-22	hypothetical protein, conserved
TcCLB.509789.40	-1.79516	3.26594e-11	hypothetical protein, conserved
TcCLB.510187.240	-1.79513	4.52954e-17	hypothetical protein, conserved
TcCLB.511825.210	-1.795	3.66528e-08	dephospho-CoA kinase, putative
TcCLB.506435.20	-1.79416	1.47926e-11	hypothetical protein, conserved
TcCLB.510899.50	-1.7939	1.55174e-15	palmitoyl acyltransferase 4, putative
TcCLB.509571.10	-1.79142	1.06055e-07	hypothetical protein, conserved
TcCLB.503837.10	-1.79072	3.59076e-23	hypothetical protein, conserved
TcCLB.510421.270	-1.79044	8.21899e-07	hypothetical protein, conserved
TcCLB.508175.360	-1.78723	1.49902e-32	cystathionine beta-synthase
TcCLB.508153.340	-1.78652	2.49523e-16	ATP-dependent 6-phosphofructokinase, glycosomal
TcCLB.503785.30	-1.78646	0.00010164	hypothetical protein, conserved
TcCLB.509601.70	-1.78617	2.25569e-12	V-type proton ATPase subunit a, putative
TcCLB.510667.60	-1.78546	4.82425e-06	peptidyl-prolyl cis-trans isomerase (cyclophilin), putative
TcCLB.506989.20	-1.78525	1.54607e-19	hypothetical protein, conserved
TcCLB.508153.130	-1.78472	2.34095e-15	enoyl-CoA hydratase, mitochondrial precursor, putative
TcCLB.506835.120	-1.78444	6.44617e-09	DNA ligase I, putative
TcCLB.508817.10	-1.78391	6.46346e-09	hypothetical protein, conserved
TcCLB.503703.40	-1.78336	3.32147e-17	hypothetical protein, conserved
TcCLB.425969.9	-1.78329	2.62114e-06	cyclin-dependent kinases regulatory subunit, putative
TcCLB.507663.30	-1.78057	1.00208e-10	hypothetical protein, conserved
TcCLB.508175.100	-1.77911	6.19733e-22	hypothetical protein
TcCLB.508257.140	-1.77861	1.47037e-09	Aquaporin 2
TcCLB.506469.139	-1.7786	3.05331e-05	hypothetical protein, conserved
TcCLB.504741.240	-1.77794	8.85651e-10	hypothetical protein, conserved
TcCLB.508173.90	-1.77785	0.00110629	hypothetical protein, conserved
TcCLB.508299.70	-1.7774	2.22987e-19	peroxisome targeting signal 1 receptor, putative
TcCLB.507515.40	-1.77726	1.4473e-05	hypothetical protein, conserved
TcCLB.509945.20	-1.77664	7.78008e-10	hypothetical protein, conserved
TcCLB.507081.50	-1.77593	2.67176e-12	hypothetical protein, conserved
TcCLB.503809.75	-1.77587	0.00143802	hypothetical protein, conserved
TcCLB.424123.40	-1.77569	5.3634e-05	RNA-binding protein, putative
TcCLB.503823.84	-1.77504	1.32098e-09	DNA-directed RNA polymerase I subunit, putative
TcCLB.509331.221	-1.77498	0.00506245	hypothetical protein, conserved
TcCLB.503597.10	-1.7743	2.36399e-11	homoserine kinase
TcCLB.508177.20	-1.77358	0.00326269	carbohydrate kinase, thermoresistant glucokinase, putative
TcCLB.511825.80	-1.7727	2.02063e-17	I/6 autoantigen, putative
TcCLB.506789.260	-1.77264	2.28381e-05	hypothetical protein, conserved
TcCLB.509911.90	-1.77155	4.61554e-23	peptidase, putative
TcCLB.511323.40	-1.77102	5.90308e-09	histone H2A variant Z
TcCLB.508073.10	-1.7708	0.00168718	surface protease GP63, putative
TcCLB.510679.40	-1.77062	7.27591e-31	hypothetical protein
TcCLB.506989.50	-1.7704	6.84756e-07	hypothetical protein, conserved
TcCLB.509719.53	-1.76972	9.05436e-06	hypothetical protein, conserved
TcCLB.507063.110	-1.76968	1.20174e-14	hypothetical protein, conserved
TcCLB.509859.50	-1.76942	0.000236393	hypothetical protein, conserved
TcCLB.508879.120	-1.76908	6.93601e-16	hypothetical protein, conserved
TcCLB.507787.140	-1.76752	6.44617e-09	hypothetical protein, conserved
TcCLB.506977.120	-1.76639	6.59992e-09	hypothetical protein, conserved
TcCLB.507159.30	-1.76591	5.60167e-12	hypothetical protein, conserved
TcCLB.508891.130	-1.76538	2.33422e-09	hypothetical protein, conserved
TcCLB.407335.9	-1.7653	2.5358e-05	phosphatidylserine decarboxylase, putative
TcCLB.511859.170	-1.76495	5.57868e-10	NADH-cytochrome b5 reductase, putative
TcCLB.508319.30	-1.76369	2.76813e-19	hypothetical protein, conserved
TcCLB.510329.80	-1.76323	4.63397e-09	hypothetical protein, conserved
TcCLB.504797.140	-1.7632	5.1859e-10	CLC-type chloride channel, putative
TcCLB.506435.110	-1.75964	6.41591e-06	hypothetical protein, conserved
TcCLB.506871.100	-1.75719	8.68086e-08	polypeptide deformylase-like protein, putative
TcCLB.510661.80	-1.75654	1.61684e-08	hypothetical protein
TcCLB.508815.160	-1.75628	6.89893e-14	ER lumen retaining receptor protein, putative
TcCLB.509695.40	-1.75593	2.02689e-09	hypothetical protein, conserved
TcCLB.507615.110	-1.75562	2.72172e-09	Engulfment and cell motility domain-containing protein
TcCLB.508173.264	-1.75556	3.09777e-15	peripherally associated ATOM36
TcCLB.511383.70	-1.75498	8.4214e-06	hypothetical protein, conserved
TcCLB.510993.10	-1.75419	1.46046e-14	(H+)-ATPase G subunit
TcCLB.511367.129	-1.75382	1.0381e-10	hypothetical protein, conserved
TcCLB.509053.130	-1.75339	1.75399e-06	DnaJ chaperone protein, putative
TcCLB.508593.110	-1.75261	7.04438e-13	arginine N-methyltransferase, putative
TcCLB.508823.10	-1.75256	3.7993e-12	hypothetical protein, conserved
TcCLB.510303.40	-1.75219	3.29046e-13	hypothetical protein
TcCLB.508823.60	-1.75216	3.68608e-08	hypothetical protein, conserved
TcCLB.508405.80	-1.75205	2.23448e-07	Peptidase C50 separase, putative
TcCLB.509849.30	-1.75203	3.23383e-06	hypothetical protein
TcCLB.507601.170	-1.75074	1.93464e-13	histone H4, putative
TcCLB.510421.250	-1.75043	1.25017e-14	hypothetical protein, conserved
TcCLB.510121.190	-1.74931	5.58722e-08	hypothetical protein, conserved
TcCLB.503843.10	-1.7488	4.72313e-09	hypothetical protein, conserved
TcCLB.508409.280	-1.74875	1.32583e-06	hypothetical protein, conserved
TcCLB.508199.20	-1.74874	3.06908e-12	hypothetical protein, conserved
TcCLB.511385.30	-1.74855	2.43928e-26	vacuolar-type proton translocating pyrophosphatase 1
TcCLB.510901.100	-1.74783	8.25118e-12	DNA topoisomerase III, putative
TcCLB.508961.20	-1.7465	6.53479e-09	hypothetical protein, conserved
TcCLB.508177.110	-1.7463	3.25401e-27	cystathionine beta-synthase
TcCLB.509163.110	-1.74625	5.90724e-05	retrotransposon hot spot (RHS) protein, putative
TcCLB.508739.90	-1.74605	3.74823e-08	hypothetical protein, conserved
TcCLB.511825.40	-1.74582	9.48036e-12	centrin-4, putative
TcCLB.510359.180	-1.74562	1.16394e-08	hypothetical protein, conserved
TcCLB.508177.90	-1.74515	1.26321e-17	hypothetical protein, conserved
TcCLB.507061.34	-1.74486	3.76523e-06	hypothetical protein, conserved
TcCLB.507623.140	-1.74477	4.09294e-07	endonuclease G, putative
TcCLB.507519.100	-1.74476	4.05383e-06	hypothetical protein, conserved
TcCLB.511367.100	-1.74368	3.96613e-10	hypothetical protein, conserved
TcCLB.509749.39	-1.7429	0.000519722	short-chain dehydrogenase, putative
TcCLB.510947.40	-1.74174	1.73943e-10	agmatinase, putative
TcCLB.511237.110	-1.74095	9.90033e-10	cyclophilin, putative
TcCLB.508355.50	-1.73986	5.58004e-09	hypothetical protein, conserved
TcCLB.460127.20	-1.73935	4.91778e-19	CAAX prenyl protease 1, putative
TcCLB.509857.50	-1.7391	2.58508e-09	hook complex protein, conserved
TcCLB.506559.400	-1.73896	2.74678e-08	hypothetical protein, conserved
TcCLB.511245.24	-1.73846	5.59905e-09	hypothetical protein, conserved
TcCLB.508177.129	-1.7381	3.8298e-21	cystathionine beta-synthase, putative
TcCLB.510665.30	-1.73805	1.49778e-08	hypothetical protein, conserved
TcCLB.509733.10	-1.73792	2.60996e-06	hypothetical protein, conserved
TcCLB.508677.60	-1.73783	7.16187e-07	hypothetical protein
TcCLB.507017.104	-1.73775	2.7283e-05	hypothetical protein
TcCLB.507801.40	-1.73718	2.62364e-07	hypothetical protein, conserved
TcCLB.504113.30	-1.73712	1.7424e-06	hypothetical protein, conserved
TcCLB.503603.20	-1.73703	1.36609e-14	hypothetical protein, conserved
TcCLB.511153.140	-1.7365	1.49145e-05	proteasome beta 3 subunit, putative
TcCLB.507059.60	-1.7337	2.09123e-17	orotidine-5-phosphate decarboxylase/orotate phosphoribosyltransferase, putative
TcCLB.506581.30	-1.73296	2.40826e-17	eukaryotic translation initiation factor 3 subunit l
TcCLB.507601.20	-1.73228	0.000157474	hypothetical protein, conserved
TcCLB.506315.70	-1.73148	8.95281e-09	hypothetical protein, conserved
TcCLB.510397.10	-1.73128	2.98473e-06	hypothetical protein, conserved
TcCLB.508405.50	-1.7312	2.3704e-05	hypothetical protein, conserved
TcCLB.510823.109	-1.73063	1.26078e-05	hypothetical protein, conserved
TcCLB.508479.250	-1.73032	3.36708e-12	membrane-bound acid phosphatase 2, putative
TcCLB.506959.40	-1.73021	1.66021e-15	enoyl-CoA hydratase/isomerase family protein, putative
TcCLB.506201.150	-1.73012	1.42108e-05	hypothetical protein, conserved
TcCLB.504131.190	-1.72922	7.78075e-12	mitochondrial carrier protein, putative
TcCLB.453445.20	-1.72801	2.42872e-14	ubiquitin-conjugating enzyme E2, putative
TcCLB.506727.50	-1.72638	4.17002e-18	hypothetical protein, conserved
TcCLB.510659.230	-1.726	1.7008e-06	hypothetical protein, conserved
TcCLB.508409.210	-1.72591	2.96755e-22	Hsc70-interacting protein, putative
TcCLB.504741.170	-1.72522	7.71184e-09	dual specificity protein phosphatase, putative
TcCLB.505193.84	-1.72493	0.00128257	hypothetical protein, conserved
TcCLB.509671.20	-1.7244	3.46664e-12	hypothetical protein, conserved
TcCLB.509935.20	-1.72174	5.53578e-16	hypothetical protein, conserved
TcCLB.511003.30	-1.72169	1.18129e-12	RNA editing associated helicase 2, putative
TcCLB.511021.60	-1.72141	2.95548e-12	hypothetical protein, conserved
TcCLB.508045.14	-1.72124	8.78339e-06	hypothetical protein, conserved
TcCLB.508153.454	-1.72087	3.96389e-10	hypothetical protein, conserved
TcCLB.510661.90	-1.72049	1.8407e-09	ATP-dependent RNA helicase, putative
TcCLB.508971.40	-1.71908	1.08298e-22	acetylornithine deacetylase-like, putative
TcCLB.506573.40	-1.71776	6.49697e-11	hypothetical protein, conserved
TcCLB.506975.63	-1.71634	0.000131718	hypothetical protein, conserved
TcCLB.509799.30	-1.71618	6.6191e-08	adenylyl cyclase-associated protein, putative
TcCLB.506789.290	-1.71533	1.71742e-12	hypothetical protein, conserved
TcCLB.509793.69	-1.71478	5.50334e-07	hypothetical protein, conserved
TcCLB.511277.539	-1.71451	7.82912e-05	hypothetical protein, conserved
TcCLB.507675.30	-1.71437	0.00193374	hypothetical protein, conserved
TcCLB.511649.150	-1.71237	3.35669e-08	phosphoglycerate mutase protein, putative
TcCLB.510575.220	-1.71211	8.861e-10	hypothetical protein, conserved
TcCLB.509065.124	-1.71114	2.12637e-06	U6 snRNA-associated Sm-like protein LSm5p
TcCLB.509985.60	-1.71026	7.71651e-12	hypothetical protein, conserved
TcCLB.510329.130	-1.71001	6.50708e-17	UDP-glucose:glycoprotein glucosyltransferase
TcCLB.504157.120	-1.708	1.8576e-08	hypothetical protein, conserved
TcCLB.506559.460	-1.70774	2.75582e-07	hypothetical protein
TcCLB.508577.160	-1.70634	3.0624e-11	proteasome beta 6 subunit, putative
TcCLB.510903.60	-1.70599	5.10562e-11	prenyltransferase, putative
TcCLB.510187.430	-1.70578	4.77934e-13	DNA mismatch repair protein MSH6, putative
TcCLB.419833.10	-1.70572	0.000153748	vacuolar protein sorting 18, putative
TcCLB.508297.41	-1.7053	4.30961e-07	hypothetical protein, conserved
TcCLB.507801.50	-1.70442	7.221e-07	tubulin-tyrosine ligase, putative
TcCLB.511237.100	-1.70385	4.71953e-11	hypothetical protein, conserved
TcCLB.508153.710	-1.7023	1.84095e-05	hypothetical protein
TcCLB.504161.20	-1.70227	8.4561e-10	hypothetical protein, conserved
TcCLB.511673.9	-1.70153	0.000203402	hypothetical protein, conserved
TcCLB.509795.10	-1.70137	1.96363e-05	hypothetical protein, conserved
TcCLB.506303.150	-1.70081	3.54328e-08	hypothetical protein, conserved
TcCLB.511391.160	-1.69988	3.01204e-23	cytochrome c1, heme protein, mitochondrial, putative
TcCLB.504021.100	-1.69883	1.68599e-09	hypothetical protein, conserved
TcCLB.508651.20	-1.6988	1.41992e-18	cytochrome c oxidase subunit 10, putative
TcCLB.506011.30	-1.69845	0.000258148	hypothetical protein, conserved
TcCLB.508397.10	-1.69841	4.36571e-07	V-type proton ATPase subunit D, putative
TcCLB.506573.70	-1.69826	2.28731e-06	hypothetical protein, conserved
TcCLB.504071.30	-1.69819	9.97464e-19	hypothetical protein, conserved
TcCLB.508141.80	-1.69784	7.58229e-12	hypothetical protein, conserved
TcCLB.455721.9	-1.69753	7.83577e-13	cytochrome c oxidase subunit 10, putative
TcCLB.511269.20	-1.69659	7.12149e-13	Multisite-specific tRNA:(cytosine-C(5))-methyltransferase, putative
TcCLB.504131.100	-1.69638	3.11267e-14	DnaJ chaperone protein, putative
TcCLB.511281.10	-1.69617	0.000177081	hypothetical protein, conserved
TcCLB.503869.50	-1.69617	3.63756e-10	exosome-associated protein 1, putative
TcCLB.511031.20	-1.69581	1.38214e-07	hypothetical protein, conserved
TcCLB.508355.20	-1.69572	1.27635e-05	hypothetical protein, conserved
TcCLB.506839.34	-1.69516	0.00160935	oxidoreductase, putative
TcCLB.504001.10	-1.69466	2.18444e-10	hypothetical protein, conserved
TcCLB.509177.50	-1.69445	2.56388e-11	hypothetical protein, conserved
TcCLB.508199.10	-1.6943	1.26206e-07	ADP-ribosylation factor, putative
TcCLB.511465.10	-1.69331	1.95618e-14	proteasome activator protein pa26, putative
TcCLB.511301.100	-1.69328	4.60167e-08	hypothetical protein, conserved
TcCLB.511277.550	-1.69324	0.000239806	hypothetical protein, conserved
TcCLB.509573.30	-1.69185	1.75416e-13	flagellar protofilament ribbon protein, putative
TcCLB.509317.60	-1.69098	2.28317e-09	RNA-binding protein, putative
TcCLB.509105.60	-1.69096	1.72896e-06	adenosine deaminase-like protein, putative
TcCLB.510395.20	-1.69087	0.000315521	hypothetical protein, conserved
TcCLB.509065.140	-1.69073	1.41071e-06	hypothetical protein, conserved
TcCLB.507969.60	-1.68989	2.85765e-13	C-14 sterol reductase, putative
TcCLB.508043.30	-1.68908	2.61159e-16	ubiquitin-activating enzyme E1, putative
TcCLB.506817.40	-1.68894	8.06925e-10	hypothetical protein, conserved
TcCLB.511391.200	-1.6886	9.67761e-17	pitrilysin-like metalloprotease, putative
TcCLB.510155.120	-1.68848	3.29026e-11	ubiquitin activating enzyme, putative
TcCLB.507715.34	-1.68803	5.46198e-08	hypothetical protein, conserved
TcCLB.504741.180	-1.68692	6.52143e-10	hypothetical protein, conserved
TcCLB.504797.14	-1.68692	0.00613276	hypothetical protein, conserved
TcCLB.508409.140	-1.68538	1.43097e-07	hypothetical protein, conserved
TcCLB.508153.730	-1.68418	9.36045e-22	Eukaryotic translation initiation factor 2 subunit alpha
TcCLB.508661.10	-1.68414	3.23095e-09	Eukaryotic translation initiation factor 4E type 5, putative
TcCLB.508593.30	-1.68269	4.8135e-07	hypothetical protein, conserved
TcCLB.509505.60	-1.68251	0.00045123	hypothetical protein
TcCLB.510729.160	-1.68206	1.20921e-12	hypothetical protein, conserved
TcCLB.508917.49	-1.68147	0.0016327	peptidase t, putative
TcCLB.508625.150	-1.6814	4.03119e-06	L-ribulokinase, putative
TcCLB.507007.70	-1.68093	5.89842e-18	Co-chaperone protein P23
TcCLB.510885.60	-1.68014	1.28705e-14	calcium-activated potassium channel, putative
TcCLB.508821.60	-1.6795	4.76429e-08	hypothetical protein, conserved
TcCLB.509721.30	-1.67875	2.58508e-09	intraflagellar transport protein 122B, putative
TcCLB.508501.230	-1.67764	2.5152e-06	monothiol glutaredoxin, putative
TcCLB.416891.19	-1.67704	0.00096134	hypothetical protein
TcCLB.504069.70	-1.67669	7.83095e-16	vacuolar ATP synthase, putative
TcCLB.509023.180	-1.67574	1.93893e-10	kinesin, putative
TcCLB.508741.10	-1.67546	1.73491e-09	hypothetical protein
TcCLB.506471.10	-1.67393	0.00024775	hypothetical protein, conserved
TcCLB.510301.60	-1.67354	0.000275055	hypothetical protein, conserved
TcCLB.508707.224	-1.67353	0.00153586	tubulin binding cofactor A-like protein, putative
TcCLB.507623.125	-1.67286	0.00331286	hypothetical protein, conserved
TcCLB.508707.160	-1.67259	7.34116e-08	hypothetical protein, conserved
TcCLB.508409.40	-1.67202	1.47666e-13	Putative intraflagellar transport protein B2
TcCLB.509913.20	-1.67178	3.60655e-12	hypothetical protein, conserved
TcCLB.510119.60	-1.67135	1.64145e-07	hypothetical protein, conserved
TcCLB.507225.19	-1.671	1.82762e-08	hypothetical protein
TcCLB.509719.69	-1.66962	1.72686e-07	hypothetical protein, conserved
TcCLB.507033.20	-1.66929	2.9953e-10	histone H3 variant V
TcCLB.509693.40	-1.66924	3.76493e-06	hypothetical protein, conserved
TcCLB.509679.9	-1.66916	1.38551e-05	leucyl-tRNA synthetase, putative
TcCLB.503891.90	-1.66911	0.00284767	hypothetical protein
TcCLB.503735.40	-1.66819	6.60074e-05	hypothetical protein
TcCLB.511021.30	-1.66793	2.00318e-08	hypothetical protein, conserved
TcCLB.506295.150	-1.66793	0.000548642	hypothetical protein
TcCLB.506985.30	-1.66732	4.9627e-11	proteasome alpha 3 subunit, putative
TcCLB.510187.260	-1.66643	7.3546e-08	hypothetical protein, conserved
TcCLB.509177.10	-1.66636	3.43674e-06	hypothetical protein, conserved
TcCLB.508641.184	-1.66621	2.77639e-07	Eukaryotic translation initiation factor 1, putative
TcCLB.511825.260	-1.66539	4.97178e-05	ribosomal RNA processing protein 45, putative
TcCLB.509395.70	-1.66485	7.68538e-11	hypothetical protein, conserved
TcCLB.503925.6	-1.6646	1.53368e-05	hypothetical protein, conserved
TcCLB.508547.40	-1.66411	0.00134039	hypothetical protein, conserved
TcCLB.510901.70	-1.66394	4.3393e-13	mitochondrial RNA binding complex 1 subunit, putative
TcCLB.507063.90	-1.66317	1.82169e-11	mitochondrial DNA polymerase beta, putative
TcCLB.404073.10	-1.66278	0.000875066	hypothetical protein, conserved
TcCLB.511827.64	-1.66247	1.28925e-06	hypothetical protein, conserved
TcCLB.510643.190	-1.6618	0.00262981	retrotransposon hot spot (RHS) protein, putative
TcCLB.507801.60	-1.66153	1.06727e-08	hypothetical protein, conserved
TcCLB.511025.120	-1.66033	4.41002e-09	CYC2-like cyclin, putative
TcCLB.508601.119	-1.65901	3.17368e-14	ribose 5-phosphate isomerase, putative
TcCLB.511643.10	-1.65743	2.7212e-11	hypothetical protein, conserved
TcCLB.507049.190	-1.6572	6.70824e-10	hypothetical protein, conserved
TcCLB.511825.50	-1.6568	1.28171e-09	centrin-4, putative
TcCLB.416511.9	-1.65676	1.10561e-05	mismatch repair protein MSH3, putative
TcCLB.507897.10	-1.65618	3.05039e-06	hypothetical protein, conserved
TcCLB.506295.70	-1.65615	8.34982e-15	hypothetical protein, conserved
TcCLB.509791.120	-1.65606	8.98533e-06	kinetoplast-associated protein
TcCLB.510659.104	-1.65566	8.49953e-05	poly(ADP-ribose) glycohydrolase, putative
TcCLB.508409.338	-1.65549	6.42495e-05	DNA repair protein, putative
TcCLB.508409.180	-1.65516	1.19743e-14	hypothetical protein, conserved
TcCLB.511807.150	-1.65474	3.81685e-07	hypothetical protein, conserved
TcCLB.507063.250	-1.65452	0.000992849	hypothetical protein
TcCLB.509733.140	-1.65423	3.26715e-10	hypothetical protein, conserved
TcCLB.507019.30	-1.65385	4.61835e-11	ribosome biogenesis regulatory protein (RRS1), putative
TcCLB.511245.200	-1.65379	4.82881e-11	hypothetical protein, conserved
TcCLB.506985.10	-1.65336	1.26159e-05	hypothetical protein, conserved
TcCLB.509237.50	-1.65245	1.95099e-09	hypothetical protein, conserved
TcCLB.504071.100	-1.65192	2.16168e-11	hypothetical protein, conserved
TcCLB.507017.64	-1.65169	0.00351022	hypothetical protein, conserved
TcCLB.511367.138	-1.65167	7.73389e-13	chaperone DNAJ protein, putative
TcCLB.508443.20	-1.65157	4.19144e-08	DnaJ homolog, putative
TcCLB.507891.29	-1.65132	8.39694e-11	flagellar calcium-binding 24 kDa protein
TcCLB.510031.50	-1.65103	9.37112e-06	ATP-dependent RNA helicase, putative
TcCLB.509911.100	-1.65067	6.00824e-07	chaperone DNAJ protein, putative
TcCLB.506123.50	-1.65029	1.15776e-05	hypothetical protein, conserved
TcCLB.507049.20	-1.64942	5.54558e-08	hypothetical protein
TcCLB.510329.170	-1.64871	3.79077e-11	hypothetical protein, conserved
TcCLB.510659.194	-1.64826	0.000196735	hypothetical protein, conserved
TcCLB.504003.60	-1.64825	2.1328e-17	chaperonin/T-complex protein 1 gamma subunit, putative
TcCLB.506325.10	-1.64795	1.41578e-06	retrotransposon hot spot (RHS) protein, putative
TcCLB.506195.140	-1.64765	7.6283e-07	hypothetical protein, conserved
TcCLB.508707.300	-1.64747	1.92376e-06	hypothetical protein, conserved
TcCLB.511907.80	-1.64744	2.24477e-09	beta-ketoacyl-ACP reductase 2, putative
TcCLB.511523.80	-1.64694	1.16141e-05	hypothetical protein, conserved
TcCLB.506959.94	-1.64646	7.50948e-08	hypothetical protein, conserved
TcCLB.510659.257	-1.64573	0.00109097	phospholipase A2-like protein, putative
TcCLB.511815.150	-1.64549	4.38202e-09	hypothetical protein
TcCLB.511293.10	-1.64546	0.00612265	extracellular receptor, putative
TcCLB.511229.20	-1.64536	5.64799e-05	oxidoreductase, putative
TcCLB.508445.99	-1.64466	8.64366e-07	pumilio/PUF RNA binding protein 7, putative
TcCLB.509039.10	-1.64325	3.15665e-12	hypothetical protein, conserved
TcCLB.508741.140	-1.64212	3.43892e-12	imidazolonepropionase, putative
TcCLB.511287.110	-1.6411	1.84048e-12	hypothetical protein, conserved
TcCLB.506389.50	-1.64096	6.02743e-09	hypothetical protein, conserved
TcCLB.510729.50	-1.64048	4.88791e-05	hypothetical protein, conserved
TcCLB.511727.300	-1.64033	1.87438e-09	GDP-L-fucose synthetase, putative
TcCLB.511807.260	-1.63992	4.08064e-10	hypothetical protein, conserved
TcCLB.508543.80	-1.63955	6.98281e-07	hypothetical protein, conserved
TcCLB.504131.40	-1.63949	1.79632e-05	hypothetical protein, conserved
TcCLB.508153.1080	-1.63804	1.28736e-08	hypothetical protein, conserved
TcCLB.503999.50	-1.63779	6.06236e-05	ubiquitin-conjugating enzyme, putative
TcCLB.511003.190	-1.63666	4.90346e-12	hypothetical protein, conserved
TcCLB.508667.49	-1.63613	6.18321e-08	small nuclear ribonucleoprotein SmD2, putative
TcCLB.508231.200	-1.63579	8.81179e-11	40S ribosomal protein S8, putative
TcCLB.511381.40	-1.63578	6.57368e-11	DNA-directed rna polymerase I largest subunit, putative
TcCLB.509569.120	-1.63497	4.52982e-11	RNA-binding protein, putative
TcCLB.508397.60	-1.63454	2.29886e-06	methyltransferase, putative
TcCLB.509621.10	-1.63451	1.25486e-06	hypothetical protein, conserved
TcCLB.510303.280	-1.63338	3.09009e-05	hypothetical protein
TcCLB.510087.90	-1.63305	1.39745e-07	hypothetical protein, conserved
TcCLB.507675.10	-1.63301	2.20624e-13	hypothetical protein, conserved
TcCLB.506807.30	-1.63229	0.000145248	hypothetical protein, conserved
TcCLB.509063.10	-1.63208	1.7368e-06	hypothetical protein, conserved
TcCLB.511281.20	-1.63109	2.02393e-07	transporter, putative
TcCLB.503797.10	-1.63088	0.000218688	hypothetical protein, conserved
TcCLB.511925.40	-1.6308	0.000382791	hypothetical protein, conserved
TcCLB.511817.280	-1.62984	2.31943e-06	hypothetical protein, conserved
TcCLB.509603.10	-1.62972	0.00463519	vacuolar protein sorting 18, putative
TcCLB.509719.26	-1.62962	8.0873e-09	hypothetical protein, conserved
TcCLB.506957.100	-1.62953	0.000185347	hypothetical protein, conserved
TcCLB.509437.110	-1.62938	3.69084e-09	retrotransposon hot spot (RHS) protein, putative
TcCLB.506835.70	-1.62861	9.1478e-12	PAS-domain containing phosphoglycerate kinase, putative
TcCLB.508543.100	-1.6284	2.85937e-13	eukaryotic translation initiation factor 3 subunit h
TcCLB.511755.50	-1.62832	3.23962e-06	hypothetical protein, conserved
TcCLB.503823.60	-1.62796	5.89634e-06	hypothetical protein, conserved
TcCLB.509429.200	-1.62762	7.20897e-07	hypothetical protein, conserved
TcCLB.509037.50	-1.62721	2.04026e-08	aspartyl-tRNA synthetase, putative
TcCLB.508409.199	-1.62682	1.20599e-06	hypothetical protein, conserved
TcCLB.506303.111	-1.62639	5.03429e-09	hypothetical protein, conserved
TcCLB.506999.60	-1.62639	4.28902e-12	hypothetical protein, conserved
TcCLB.506821.90	-1.62613	3.98148e-06	hypothetical protein, conserved
TcCLB.507765.130	-1.62531	9.80894e-07	hypothetical protein, conserved
TcCLB.509749.30	-1.62482	2.67834e-05	hypothetical protein, conserved
TcCLB.508355.240	-1.62395	0.000121466	hypothetical protein, conserved
TcCLB.503939.114	-1.62366	9.66306e-07	hypothetical protein, conserved
TcCLB.510421.290	-1.62319	3.14967e-06	Mad2-like HORMA domain containing protein
TcCLB.506177.20	-1.62311	1.329e-06	lectin, putative
TcCLB.506195.210	-1.62133	2.64303e-11	hypothetical protein, conserved
TcCLB.510825.20	-1.62078	0.00222095	hypothetical protein, conserved
TcCLB.511837.40	-1.6207	5.87453e-05	hypothetical protein, conserved
TcCLB.503431.60	-1.62052	3.07825e-10	acid phosphatase, putative
TcCLB.508741.260	-1.61932	2.33724e-13	hypothetical protein, conserved
TcCLB.510153.5	-1.6187	0.00139181	hypothetical protein, conserved
TcCLB.506297.340	-1.618	1.01978e-05	hypothetical protein, conserved
TcCLB.510659.250	-1.61785	4.16826e-09	phospholipase A1, putative
TcCLB.511821.90	-1.61741	0.000124903	hypothetical protein, conserved
TcCLB.506297.300	-1.61739	8.35493e-10	eukaryotic release factor 3, putative
TcCLB.507663.80	-1.61642	3.35354e-07	hypothetical protein, conserved
TcCLB.508303.4	-1.61641	0.000157687	ubiquitin-conjugating enzyme E2, putative
TcCLB.511021.70	-1.61553	3.77729e-11	ABC transporter of the mitochondrion, putative
TcCLB.509789.20	-1.61504	2.18456e-06	hypothetical protein
TcCLB.503935.20	-1.61491	2.4729e-12	2-oxoglutarate dehydrogenase, E2 component, dihydrolipoamide succinyltransferase, putative
TcCLB.503911.20	-1.61476	1.48568e-12	pre-mRNA splicing factor ATP-dependent RNA helicase, putative
TcCLB.509161.60	-1.61473	7.54237e-09	hypothetical protein, conserved
TcCLB.506975.30	-1.61469	6.91116e-08	amidohydrolase, putative
TcCLB.506583.40	-1.61465	0.000481232	cdc2-related kinase 3, putative
TcCLB.511499.59	-1.61376	0.000237156	small nuclear ribonucleoprotein Sm-E, putative
TcCLB.508859.74	-1.61376	1.39222e-08	J Biosynthesis Protein 2
TcCLB.509569.170	-1.61375	3.31777e-09	hypothetical protein
TcCLB.511827.10	-1.61364	0.00805435	hypothetical protein, conserved
TcCLB.504933.20	-1.61346	2.12968e-05	hypothetical protein
TcCLB.510187.480	-1.6134	1.95853e-06	phosphomannomutase, putative
TcCLB.511661.40	-1.61323	3.16914e-08	signal peptidase type I, putative
TcCLB.511277.490	-1.61311	1.43169e-05	hypothetical protein, conserved
TcCLB.510357.70	-1.61307	1.4198e-06	ubiquinone biosynthesis protein-like protein, putative
TcCLB.508409.190	-1.61291	0.000145186	hypothetical protein, conserved
TcCLB.506435.390	-1.61272	3.6168e-07	mitochondrial ATP-dependent zinc metallopeptidase, putative
TcCLB.507771.30	-1.61265	1.51049e-05	hypothetical protein, conserved
TcCLB.511513.14	-1.61256	4.43114e-06	hypothetical protein, conserved
TcCLB.510119.40	-1.61254	2.64948e-06	hypothetical protein, conserved
TcCLB.509319.20	-1.61242	1.08707e-06	hypothetical protein, conserved
TcCLB.509317.90	-1.61238	6.13735e-06	hypothetical protein, conserved
TcCLB.503999.30	-1.61183	7.26324e-12	hypothetical protein, conserved
TcCLB.511837.29	-1.61175	7.90217e-06	iron-sulfur cluster assembly protein, putative
TcCLB.508665.14	-1.61115	4.64074e-18	chaperone protein ClpB1, putative
TcCLB.504797.60	-1.61092	2.15625e-05	hypothetical protein, conserved
TcCLB.504253.30	-1.61063	3.1285e-09	hypothetical protein, conserved
TcCLB.510031.70	-1.60874	5.11908e-07	heat shock protein Hsp20, putative
TcCLB.506789.220	-1.60842	3.82576e-06	hypothetical protein, conserved
TcCLB.507681.220	-1.60774	1.31615e-08	pre-mRNA splicing factor ATP-dependent RNA helicase, putative
TcCLB.507001.110	-1.60711	2.14912e-11	galactokinase-like protein, putative
TcCLB.511367.340	-1.60702	5.40201e-15	mitochondrial processing peptidase alpha subunit, putative
TcCLB.503987.60	-1.60701	2.45929e-05	hypothetical protein, conserved
TcCLB.509715.9	-1.60701	0.000102311	Ribosomal RNA processing protein 41A
TcCLB.510729.70	-1.60695	3.42786e-08	proteasome alpha 1 subunit, putative
TcCLB.508741.270	-1.60678	9.07396e-09	Kinetoplastid RNA editing protein 1, putative
TcCLB.508355.124	-1.6063	0.000388507	hypothetical protein, conserved
TcCLB.506727.130	-1.60609	0.0002416	hypothetical protein, conserved
TcCLB.506443.50	-1.60565	1.06263e-08	hypothetical protein, conserved
TcCLB.508857.110	-1.60417	0.00085484	hypothetical protein, conserved
TcCLB.509857.10	-1.60416	1.42436e-05	hypothetical protein, conserved
TcCLB.509057.10	-1.60376	0.00218319	hypothetical protein, conserved
TcCLB.506145.40	-1.60295	1.80186e-14	hypothetical protein, conserved
TcCLB.507007.74	-1.60262	3.03369e-05	small nuclear ribonucleoprotein Sm-F, putative
TcCLB.503869.40	-1.60121	5.16099e-10	pumilio/PUF RNA binding protein 9, putative
TcCLB.503847.50	-1.60096	0.000270084	hypothetical protein, conserved
TcCLB.506883.69	-1.60089	0.000237701	hypothetical protein, conserved
TcCLB.511239.90	-1.60056	7.01169e-07	hypothetical protein
TcCLB.509569.44	-1.60029	8.434e-07	Archaic translocase of outer membrane 12 kDa subunit, putative
TcCLB.508173.200	-1.59923	3.17547e-08	hypothetical protein, conserved
TcCLB.508153.900	-1.59923	3.38167e-09	hypothetical protein, conserved
TcCLB.505999.180	-1.59875	1.81384e-06	Non cytoplasmic domain containing protein, conserved
TcCLB.511635.69	-1.59777	0.00427491	hypothetical protein, conserved
TcCLB.507951.150	-1.59711	2.9758e-06	guanine deaminase, putative
TcCLB.507053.160	-1.59579	5.41262e-11	hypothetical protein, conserved
TcCLB.504045.110	-1.59576	1.62093e-19	urocanate hydratase, putative
TcCLB.511321.50	-1.59534	1.33689e-05	hypothetical protein, conserved
TcCLB.510655.130	-1.59526	0.00050103	hypothetical protein, conserved
TcCLB.506957.23	-1.59481	2.22061e-09	hypothetical protein, conserved
TcCLB.511897.28	-1.59455	0.00171211	hypothetical protein, conserved
TcCLB.506983.30	-1.59441	2.03378e-07	hypothetical protein, conserved
TcCLB.511291.30	-1.59402	1.84875e-06	lipoic acid synthetase, mitochondrial precursor, putative
TcCLB.508879.40	-1.59356	5.91501e-08	hypothetical protein, conserved
TcCLB.504105.190	-1.59349	4.64616e-07	hypothetical protein, conserved
TcCLB.506989.40	-1.59273	0.000756315	Golgi vesicular membrane trafficking protein, putative
TcCLB.506435.270	-1.59271	8.06544e-12	dihydroxyacetone phosphate acyltransferase, putative
TcCLB.511815.170	-1.59266	1.91781e-09	cytoskeleton associated protein, putative
TcCLB.508045.30	-1.59224	4.79003e-08	hypothetical protein, conserved
TcCLB.506821.180	-1.59163	1.15656e-05	aquaporin-like protein, putative
TcCLB.510329.240	-1.5906	0.00020931	hypothetical protein, conserved
TcCLB.508827.40	-1.59056	5.26509e-14	acyl-CoA dehydrogenase, putative
TcCLB.507951.160	-1.59011	2.51211e-07	succinate dehydrogenase flavoprotein subunit
TcCLB.508153.1074	-1.5899	2.47232e-05	hypothetical protein, conserved
TcCLB.505997.60	-1.58984	4.37538e-07	retrotransposon hot spot (RHS) protein, putative
TcCLB.508649.10	-1.58971	0.000276302	Beta propeller protein 1
TcCLB.507765.30	-1.58871	4.42475e-08	hypothetical protein, conserved
TcCLB.506679.170	-1.58842	2.44315e-09	hypothetical protein, conserved
TcCLB.509105.10	-1.5876	0.000114829	hypothetical protein, conserved
TcCLB.507221.20	-1.58641	6.09264e-10	poly(A)-specific ribonuclease PARN, putative
TcCLB.509715.80	-1.58609	1.14616e-06	hypothetical protein, conserved
TcCLB.511817.180	-1.58581	4.11567e-17	histone H2A, putative
TcCLB.510575.130	-1.5858	1.16617e-06	chloride channel protein, putative
TcCLB.509539.50	-1.58382	3.89206e-07	small GTP-binding protein, putative
TcCLB.506957.46	-1.58366	0.000546497	hypothetical protein, conserved
TcCLB.509437.60	-1.58316	2.95548e-12	hypothetical protein, conserved
TcCLB.504037.20	-1.58305	9.62703e-06	hypothetical protein, conserved
TcCLB.511861.90	-1.58046	7.36026e-09	retrotransposon hot spot (RHS) protein, putative
TcCLB.460747.30	-1.58013	0.00369855	hypothetical protein, conserved
TcCLB.426897.10	-1.57988	5.13888e-07	hypothetical protein
TcCLB.508257.40	-1.57942	1.83952e-05	hypothetical protein, conserved
TcCLB.511807.60	-1.57933	4.29451e-07	hypothetical protein, conserved
TcCLB.507969.70	-1.57928	4.85567e-05	hypothetical protein, conserved
TcCLB.509567.60	-1.57915	3.56987e-07	hypothetical protein
TcCLB.508741.310	-1.57871	1.42214e-08	hypothetical protein
TcCLB.509671.90	-1.57838	1.16117e-05	COP-coated vesicle membrane protein gp25L precursor, putative
TcCLB.503891.40	-1.57789	8.2654e-09	hypothetical protein, conserved
TcCLB.511381.50	-1.57765	2.65748e-11	hypothetical protein, conserved
TcCLB.511025.100	-1.57749	1.23358e-07	chaperone DNAJ protein, putative
TcCLB.510187.448	-1.57748	3.20954e-06	hypothetical protein, conserved
TcCLB.511717.90	-1.5772	1.04041e-14	phosphomannose isomerase, putative
TcCLB.510635.40	-1.57692	3.27632e-09	hypothetical protein, conserved
TcCLB.508461.330	-1.57671	0.00101746	hypothetical protein
TcCLB.509353.60	-1.57525	4.7392e-11	calmodulin, putative
TcCLB.510687.30	-1.5751	4.58366e-10	hypothetical protein, conserved
TcCLB.508741.350	-1.57499	4.88058e-05	hypothetical protein, conserved
TcCLB.511495.20	-1.57498	3.59019e-07	hypothetical protein, conserved
TcCLB.504741.190	-1.57402	4.08305e-06	hypothetical protein, conserved
TcCLB.511855.50	-1.57382	3.3702e-10	hypothetical protein, conserved
TcCLB.507969.30	-1.57347	1.80698e-06	sphingosine-1-phosphate phosphatase, putative
TcCLB.506297.220	-1.57325	1.42117e-10	hypothetical protein, conserved
TcCLB.511491.140	-1.57256	1.4803e-07	hypothetical protein, conserved
TcCLB.505997.210	-1.5719	0.00389096	DNA-directed RNA polymerase III subunit, putative
TcCLB.508175.39	-1.5719	2.11126e-07	hypothetical protein, conserved
TcCLB.506177.130	-1.57173	0.00175807	hypothetical protein, conserved
TcCLB.505939.50	-1.57117	8.44491e-06	hypothetical protein
TcCLB.509553.50	-1.57106	1.92063e-08	DNA repair and recombination helicase protein PIF5, putative
TcCLB.509471.86	-1.57104	1.42418e-16	histone H3, putative
TcCLB.506669.10	-1.57056	0.000263963	hypothetical protein, conserved
TcCLB.508153.1050	-1.5704	4.6948e-11	hypothetical protein, conserved
TcCLB.510099.90	-1.57039	7.86363e-06	tyrosine phosphatase isoform, putative
TcCLB.508153.880	-1.56998	3.35038e-05	hypothetical protein, conserved
TcCLB.412435.10	-1.56995	6.09434e-10	hypothetical protein, conserved
TcCLB.509023.110	-1.56962	1.47267e-08	ATP-dependent protease ATPase subunit HslU2
TcCLB.506315.100	-1.5692	2.08933e-10	protein phosphatase 2C, putative
TcCLB.509717.30	-1.56904	6.85374e-07	hypothetical protein, conserved
TcCLB.509331.40	-1.56896	0.00376615	hypothetical protein, conserved
TcCLB.510359.330	-1.56869	6.78724e-10	hypothetical protein, conserved
TcCLB.510889.110	-1.56869	1.21334e-08	primase 2, putative
TcCLB.506123.24	-1.5646	0.00211037	dynein light chain, putative
TcCLB.506989.199	-1.56441	0.00102899	hypothetical protein, conserved
TcCLB.508269.20	-1.56398	5.13191e-05	hypothetical protein, conserved
TcCLB.510121.9	-1.56396	0.00118603	hypothetical protein, conserved
TcCLB.511815.10	-1.56395	2.72217e-08	hypothetical protein
TcCLB.511231.69	-1.5634	2.03936e-08	hypothetical protein, conserved
TcCLB.503769.40	-1.56316	7.50805e-16	cytochrome oxidase subunit VII
TcCLB.511807.280	-1.56298	3.75874e-15	hypothetical protein, conserved
TcCLB.507081.120	-1.56293	0.00125823	hypothetical protein, conserved
TcCLB.510901.30	-1.56227	3.38889e-07	hypothetical protein, conserved
TcCLB.504069.10	-1.56216	6.68272e-08	proteasome alpha 2 subunit, putative
TcCLB.511661.60	-1.56185	1.58345e-08	hypothetical protein, conserved
TcCLB.506883.40	-1.56157	0.000120869	Lsm12 protein, putative
TcCLB.508461.10	-1.55935	8.08783e-07	Present in the outer mitochondrial membrane proteome 6
TcCLB.508881.30	-1.55919	4.85471e-07	hypothetical protein, conserved
TcCLB.511383.50	-1.559	7.71916e-12	prohibitin, putative
TcCLB.509055.20	-1.55868	6.47209e-08	hypothetical protein, conserved
TcCLB.505999.170	-1.55771	2.07578e-07	hypothetical protein, conserved
TcCLB.511507.10	-1.55771	0.000615119	hypothetical protein, conserved
TcCLB.506883.50	-1.55736	1.2627e-05	Present in the outer mitochondrial membrane proteome 5
TcCLB.511277.590	-1.55729	5.81631e-08	hypothetical protein, conserved
TcCLB.508817.140	-1.55721	3.82908e-10	hypothetical protein, conserved
TcCLB.509175.18	-1.55715	0.000521767	hypothetical protein, conserved
TcCLB.503823.130	-1.55533	3.9092e-08	hypothetical protein, conserved
TcCLB.511273.59	-1.55513	9.55203e-05	5-oxoprolinase, putative
TcCLB.510659.120	-1.55448	2.35404e-07	dolichol kinase, putative
TcCLB.506443.30	-1.5528	8.25167e-06	hypothetical protein, conserved
TcCLB.506275.9	-1.55251	0.00045056	RNA polymerase-associated protein CDC73, putative
TcCLB.508153.1140	-1.55182	2.96166e-06	hypothetical protein, conserved
TcCLB.510155.60	-1.55163	1.65206e-05	hypothetical protein, conserved
TcCLB.509471.68	-1.55148	2.92105e-16	histone H3, putative
TcCLB.509177.68	-1.55146	0.000517156	translation initiation factor, putative
TcCLB.511923.130	-1.5514	8.74297e-06	hypothetical protein, conserved
TcCLB.506629.190	-1.55116	3.77718e-07	hypothetical protein, conserved
TcCLB.507005.70	-1.55057	5.36407e-06	pre-rRNA-processing protein PNO1, putative
TcCLB.511367.280	-1.5503	2.27216e-06	hypothetical protein, conserved
TcCLB.508661.30	-1.55023	5.81355e-10	DnaJ chaperone protein, putative
TcCLB.506593.10	-1.55021	1.28215e-05	hypothetical protein, conserved
TcCLB.511277.190	-1.55009	0.000127631	ras-related GTP-binding protein, putative
TcCLB.508881.10	-1.54954	7.57185e-05	hypothetical protein, conserved
TcCLB.504131.60	-1.5485	6.25732e-07	hypothetical protein, conserved
TcCLB.506247.120	-1.54696	2.45104e-07	hypothetical protein, conserved
TcCLB.507715.100	-1.5463	0.00225404	hypothetical protein, conserved
TcCLB.508909.70	-1.5463	0.0029265	hypothetical protein, conserved
TcCLB.506977.130	-1.54604	3.47106e-08	ras-related protein Rab21, putative
TcCLB.509553.40	-1.54587	3.39696e-06	ribonuclease mar1, putative
TcCLB.506999.130	-1.54566	3.12103e-09	hypothetical protein, conserved
TcCLB.506819.20	-1.54521	1.09937e-07	hypothetical protein
TcCLB.511153.64	-1.54494	6.70824e-10	Histone H2B variant V
TcCLB.506821.170	-1.54442	4.18726e-06	aquaporin-like protein, putative
TcCLB.507915.19	-1.54404	0.00982666	mismatch repair protein MSH3, putative
TcCLB.509207.150	-1.54341	7.57945e-07	kinesin, putative
TcCLB.508461.284	-1.54304	0.000239806	mitochondrial carrier protein, putative
TcCLB.507649.10	-1.54284	9.84033e-06	hypothetical protein, conserved
TcCLB.509733.134	-1.54276	0.000118334	hypothetical protein, conserved
TcCLB.508881.50	-1.54203	0.00655327	hypothetical protein, conserved
TcCLB.508299.30	-1.54184	6.91097e-06	hypothetical protein
TcCLB.508799.250	-1.5416	2.42694e-07	hypothetical protein, conserved
TcCLB.506241.50	-1.54144	2.09288e-06	hypothetical protein, conserved
TcCLB.506821.20	-1.54131	1.99162e-14	ATP-dependent Clp protease subunit, heat shock protein 104 (HSP104), putative
TcCLB.508547.130	-1.54078	0.000131439	NUDIX family hydrolase, putative
TcCLB.508355.100	-1.54049	1.47871e-07	diacylglycerol acyltransferase, putative
TcCLB.510657.50	-1.53932	0.000155669	hypothetical protein, conserved
TcCLB.507513.30	-1.53839	0.0018027	hypothetical protein, conserved
TcCLB.509877.80	-1.53839	0.000229102	ATPase domain protein, putative
TcCLB.504131.160	-1.53771	3.57219e-06	hypothetical protein
TcCLB.511807.200	-1.53764	3.6754e-09	hypothetical protein, conserved
TcCLB.509693.180	-1.53751	3.58379e-05	hypothetical protein, conserved
TcCLB.507659.10	-1.53734	1.94063e-05	hypothetical protein, conserved
TcCLB.508233.50	-1.53706	2.35274e-07	variant-surface-glycoprotein phospholipase C, putative
TcCLB.507969.54	-1.53627	3.20587e-05	hypothetical protein, conserved
TcCLB.509997.30	-1.53586	6.92537e-12	tryparedoxin 1, putative
TcCLB.509911.70	-1.53507	0.00141063	mu-adaptin 4, putative
TcCLB.506391.10	-1.53417	8.4876e-11	calmodulin
TcCLB.507017.10	-1.53405	2.8186e-09	hypothetical protein, conserved
TcCLB.510187.410	-1.534	3.25734e-06	hypothetical protein, conserved
TcCLB.509569.10	-1.53396	0.000134807	hypothetical protein, conserved
TcCLB.509937.80	-1.53312	0.00242031	hypothetical protein, conserved
TcCLB.509799.10	-1.53298	8.99944e-06	beta adaptin, putative
TcCLB.507515.4	-1.53293	1.34384e-09	trypanothione/tryparedoxin dependent peroxidase 2, putative
TcCLB.511323.50	-1.53275	2.4982e-05	NADH-ubiquinone oxidoreductase, mitochondrial, putative
TcCLB.510359.230	-1.53244	0.00011078	hypothetical protein, conserved
TcCLB.506275.30	-1.53244	0.000242958	hypothetical protein, conserved
TcCLB.503565.20	-1.53155	0.000563814	hypothetical protein, conserved
TcCLB.511249.90	-1.53128	0.000196268	hypothetical protein, conserved
TcCLB.508153.800	-1.53087	0.00638974	hypothetical protein
TcCLB.511755.28	-1.53079	0.000139914	hypothetical protein, conserved
TcCLB.508461.143	-1.53056	0.00923868	hypothetical protein, conserved
TcCLB.509471.77	-1.52959	9.21761e-16	histone H3, putative
TcCLB.506391.20	-1.52861	1.67995e-11	calmodulin, putative
TcCLB.508821.20	-1.52848	6.0411e-07	hypothetical protein, conserved
TcCLB.510887.40	-1.52792	5.9624e-07	hypothetical protein, conserved
TcCLB.511509.40	-1.52758	0.00121257	NUDIX hydrolase domain-like domain-containing protein
TcCLB.511277.60	-1.52743	3.05878e-17	alcohol dehydrogenase, putative
TcCLB.511847.20	-1.52716	7.51467e-05	hypothetical protein, conserved
TcCLB.509207.20	-1.52627	5.28666e-15	histone H2A, putative
TcCLB.508355.300	-1.52623	2.30076e-05	hypothetical protein, conserved
TcCLB.506561.10	-1.52613	0.000883552	helicase-like protein, putative
TcCLB.510221.30	-1.52552	4.98958e-08	hypothetical protein, conserved
TcCLB.506559.70	-1.52506	1.81944e-09	hypothetical protein, conserved
TcCLB.504085.20	-1.525	2.82159e-05	exosome-associated protein 2, putative
TcCLB.511819.59	-1.52497	2.87005e-06	dynein heavy chain, cytosolic, putative
TcCLB.503815.10	-1.52437	2.82419e-12	alkyl-dihydroxyacetone phosphate synthase, putative
TcCLB.506195.260	-1.52427	3.6388e-05	hypothetical protein
TcCLB.508153.750	-1.5241	0.000588854	hypothetical protein, conserved
TcCLB.510901.80	-1.52398	5.43317e-10	hypothetical protein, conserved
TcCLB.506435.220	-1.52392	0.0036279	hypothetical protein, conserved
TcCLB.508643.9	-1.52386	0.000209217	pre-mRNA-splicing factor ATP-dependent RNA helicase, putative
TcCLB.511033.20	-1.52371	2.72036e-05	hypothetical protein
TcCLB.401469.20	-1.52366	3.18088e-05	pumilio/PUF RNA binding protein 7, putative
TcCLB.511865.60	-1.5228	7.87558e-09	hypothetical protein, conserved
TcCLB.506989.220	-1.52268	0.000262433	hypothetical protein, conserved
TcCLB.511031.49	-1.52227	0.00165214	hypothetical protein, conserved
TcCLB.508027.60	-1.52223	0.000520753	hypothetical protein
TcCLB.509641.50	-1.52139	8.30111e-06	hypothetical protein, conserved
TcCLB.508873.420	-1.5209	9.61491e-05	Present in the outer mitochondrial membrane proteome 10
TcCLB.506155.10	-1.52054	2.42757e-06	hypothetical protein, conserved
TcCLB.507763.30	-1.52011	7.76376e-07	anion-transporting ATPase-like, putative
TcCLB.507773.40	-1.51973	0.000108438	hypothetical protein, conserved
TcCLB.509471.59	-1.51944	2.28008e-13	histone H3, putative
TcCLB.508911.70	-1.51861	2.75407e-05	hypothetical protein
TcCLB.508409.320	-1.51818	3.81542e-08	hypothetical protein, conserved
TcCLB.504045.120	-1.51777	2.18668e-06	hypothetical protein, conserved
TcCLB.503929.20	-1.51752	0.00210413	ribosomal protein L13, putative
TcCLB.506139.160	-1.51727	7.92572e-05	Mucin-associated surface protein (MASP), subgroup S100
TcCLB.505071.100	-1.51669	3.83206e-07	phosphatidylglycerolphosphate synthase, mitochondrial, putative
TcCLB.509033.40	-1.51662	7.53333e-08	hypothetical protein, conserved
TcCLB.506193.20	-1.51645	0.00170136	hypothetical protein, conserved
TcCLB.506629.180	-1.51641	0.000351003	hypothetical protein, conserved
TcCLB.506585.60	-1.51625	4.0969e-05	hypothetical protein, conserved
TcCLB.508699.10	-1.51545	8.67049e-09	DNA topoisomerase II, putative
TcCLB.511825.170	-1.51495	6.60074e-05	serine/threonine protein phosphatase, putative
TcCLB.511277.486	-1.51485	0.000269306	hypothetical protein, conserved
TcCLB.506679.40	-1.5148	2.35404e-07	mitogen-activated protein kinase kinase 5
TcCLB.511153.84	-1.51382	0.000255807	hypothetical protein, conserved
TcCLB.510443.30	-1.51237	1.04316e-06	hypothetical protein, conserved
TcCLB.509461.40	-1.51233	1.63663e-05	hypothetical protein, conserved
TcCLB.507601.140	-1.51218	1.68137e-07	ATP-dependent RNA helicase, putative
TcCLB.509575.10	-1.51196	1.23432e-05	retrotransposon hot spot (RHS) protein, putative
TcCLB.506355.140	-1.51165	1.68098e-06	hypothetical protein, conserved
TcCLB.507601.30	-1.51133	0.000586903	hypothetical protein, conserved
TcCLB.508637.120	-1.51118	2.41115e-05	hypothetical protein, conserved
TcCLB.503723.40	-1.51086	0.000595486	hypothetical protein, conserved
TcCLB.506999.10	-1.51035	0.00192402	hypothetical protein, conserved
TcCLB.509109.100	-1.51032	0.00255037	hypothetical protein, conserved
TcCLB.506815.40	-1.51014	0.000821276	mitochondrial RNA binding complex 1 subunit, putative
TcCLB.506833.70	-1.51012	0.00193784	cationic amino acid transporter, putative
TcCLB.503877.19	-1.51003	0.00174032	hypothetical protein, conserved
TcCLB.509029.140	-1.50981	1.21606e-07	hypothetical protein, conserved
TcCLB.508737.150	-1.5098	3.5494e-08	mitochondrial carrier protein, putative
TcCLB.510661.110	-1.5088	0.00028645	Present in the outer mitochondrial membrane proteome 7
TcCLB.511021.99	-1.50874	0.00826127	hypothetical protein, conserved
TcCLB.504797.130	-1.50852	0.00271526	hypothetical protein, conserved
TcCLB.508641.210	-1.50832	0.00168569	hypothetical protein, conserved
TcCLB.510655.120	-1.50767	1.74371e-12	aminopeptidase P, putative
TcCLB.511391.120	-1.50754	1.59231e-15	glutamamyl carboxypeptidase, putative
TcCLB.508355.180	-1.50711	1.11043e-05	hypothetical protein, conserved
TcCLB.504741.130	-1.50706	2.80061e-07	hypothetical protein, conserved
TcCLB.508693.10	-1.50629	3.88527e-08	cleavage and polyadenylation specificity factor, putative
TcCLB.506989.190	-1.5059	1.95326e-15	heat shock protein 90, putative
TcCLB.503923.30	-1.5057	0.000269663	hypothetical protein, conserved
TcCLB.510003.9	-1.50562	0.000105218	hypothetical protein, conserved
TcCLB.508479.210	-1.50551	2.94704e-05	hypothetical protein, conserved
TcCLB.511837.20	-1.50477	1.82567e-06	hypothetical protein, conserved
TcCLB.506247.240	-1.50343	0.000624793	hypothetical protein, conserved
TcCLB.509331.160	-1.50338	0.000113984	hypothetical protein, conserved
TcCLB.510187.510	-1.50242	0.00858472	hypothetical protein, conserved
TcCLB.506727.140	-1.50224	0.00301917	hypothetical protein, conserved
TcCLB.511761.80	-1.50188	0.00346726	hypothetical protein
TcCLB.507895.150	-1.50186	4.65081e-05	hypothetical protein, conserved
TcCLB.509179.180	-1.50151	5.01345e-05	zinc-finger protein ZPR1, putative
TcCLB.508911.20	-1.5012	0.000518016	hypothetical protein, conserved
TcCLB.509671.120	-1.50105	5.1421e-06	rRNA processing protein, putative
TcCLB.508881.90	-1.50054	0.000287344	hypothetical protein, conserved

## Sheet: Pt-dppf-mpo Detected genes
Gene ID	log2 Fold Change	Fold Change	p adj (FDR)	Product Description
TcCLB.506275.121	1.39153	2.62357	2.23658e-10	hypothetical protein
TcCLB.509161.10	1.27025	2.41203	2.85849e-23	ubiquitin-conjugating enzyme E2, putative
TcCLB.510581.20	1.15808	2.2316	7.96339e-15	receptor-type adenylate cyclase, putative
TcCLB.507063.70	1.1372	2.19954	8.99211e-20	trans-sialidase, Group II, putative
TcCLB.511249.110	1.11375	2.16408	5.98251e-25	kinesin K39 (pseudogene), putative
TcCLB.503583.100	1.10196	2.14646	1.49252e-06	hypothetical protein, conserved
TcCLB.506009.10	1.08039	2.11461	7.87342e-06	hypothetical protein, conserved
TcCLB.511015.30	1.0757	2.10775	1.09079e-13	Trichohyalin, putative (fragment)
TcCLB.511635.80	1.02736	2.03829	2.24704e-06	hypothetical protein, conserved
TcCLB.506479.120	1.00372	2.00517	2.08773e-08	cytidine triphosphate synthase, putative
TcCLB.508857.30	0.992617	1.98979	1.38835e-14	trans-sialidase, Group I, putative
TcCLB.507515.100	0.992383	1.98947	8.81384e-07	hypothetical protein, conserved
TcCLB.508859.118	0.982674	1.97613	7.45663e-08	trans-sialidase, putative
TcCLB.506193.60	0.961059	1.94674	1.73634e-22	ascorbate peroxidase, putative
TcCLB.511653.20	0.924051	1.89744	5.32654e-05	dual-specificity protein phosphatase, putative
TcCLB.508175.9	0.89259	1.85651	2.09317e-12	hypothetical protein, conserved (fragment)
TcCLB.510977.9	0.862088	1.81767	4.47672e-10	hypothetical protein, conserved (fragment)
TcCLB.510581.9	0.860013	1.81505	2.8732e-12	receptor-type adenylate cyclase, putative (fragment)
TcCLB.508799.270	0.841609	1.79205	3.73745e-22	protein associated with differentiation 4, putative
TcCLB.508065.70	0.840464	1.79063	2.24447e-05	protein associated with differentiation 8, putative
TcCLB.510729.140	0.821486	1.76723	4.74263e-05	NIMA-related kinase, putative
TcCLB.510305.70	0.81061	1.75395	0.000177616	hypothetical protein, conserved
TcCLB.506721.30	0.810199	1.75345	1.78855e-08	calpain-like cysteine peptidase, putative
TcCLB.508669.10	0.802583	1.74422	1.01583e-09	hypothetical protein, conserved
TcCLB.506241.80	0.776644	1.71314	6.79737e-07	hypothetical protein, conserved
TcCLB.508153.560	0.768778	1.70383	9.07932e-07	hypothetical protein, conserved
TcCLB.505985.9	0.767409	1.70221	9.6021e-10	calpain cysteine peptidase, putative (fragment)
TcCLB.511465.20	0.764069	1.69827	2.81322e-10	hypothetical protein, conserved
TcCLB.509105.140	0.751737	1.68382	6.76244e-26	heat shock protein 85, putative
TcCLB.510223.9	0.749847	1.68161	0.00497766	hypothetical protein, conserved
TcCLB.509105.150	0.749824	1.68159	4.89965e-28	heat shock protein 85, putative
TcCLB.510333.10	0.749531	1.68125	6.80687e-08	hypothetical protein, conserved
TcCLB.511907.89	0.749143	1.68079	1.49143e-05	hypothetical protein, conserved
TcCLB.510575.210	0.744066	1.67489	6.69337e-06	hypothetical protein, conserved
TcCLB.509643.139	0.743612	1.67436	4.29289e-23	Heat shock protein 83, putative
TcCLB.510335.10	0.741212	1.67158	1.48947e-07	hypothetical protein, conserved
TcCLB.504109.30	0.737373	1.66714	2.10879e-10	hypothetical protein, conserved
TcCLB.509643.130	0.734473	1.66379	3.61569e-26	heat shock protein 85, putative
TcCLB.511291.50	0.722424	1.64995	2.43312e-05	hypothetical protein, conserved
TcCLB.511269.40	0.720397	1.64764	2.70884e-05	cAMP phosphodiesterase A, putative
TcCLB.505183.130	0.719779	1.64693	4.26157e-09	sugar transporter, putative
TcCLB.508661.70	0.717518	1.64435	2.29945e-08	Enriched in surface-labeled proteome protein 18
TcCLB.508857.130	0.717317	1.64412	4.65154e-11	hypothetical protein, conserved
TcCLB.504021.10	0.708567	1.63418	3.08492e-06	G1 cyclin CycE4, putative
TcCLB.508799.290	0.703436	1.62838	3.11586e-09	hypothetical protein, conserved (fragment)
TcCLB.511565.30	0.702951	1.62783	0.00469159	mucin TcMUCII, putative
TcCLB.508175.200	0.700289	1.62483	8.97017e-08	hypothetical protein, conserved
TcCLB.509287.80	0.698966	1.62334	4.27024e-08	trans-sialidase, Group VII, putative
TcCLB.510977.20	0.693542	1.61725	0.00497766	hypothetical protein, conserved (pseudogene)
TcCLB.503411.30	0.692546	1.61613	0.00178299	hypothetical protein, conserved
TcCLB.506679.80	0.688811	1.61195	0.000204713	SNF1-related protein kinases, putative
TcCLB.508797.10	0.686613	1.6095	0.000330707	tubulin-tyrosine ligase-like protein, putative
TcCLB.508999.260	0.681814	1.60416	4.65154e-11	calpain-like cysteine peptidase (pseudogene), putative
TcCLB.510801.10	0.680557	1.60276	0.00363116	calpain-like cysteine peptidase, putative (fragment)
TcCLB.506439.9	0.68022	1.60238	7.49175e-05	myosin heavy chain, putative
TcCLB.503559.70	0.676363	1.59811	2.30729e-06	cystinosin, putative
TcCLB.503415.10	0.673053	1.59444	0.00734361	hypothetical protein (pseudogene)
TcCLB.511823.14	0.668259	1.58915	0.0123334	hypothetical protein, conserved
TcCLB.507073.20	0.665792	1.58644	3.75333e-06	hypothetical protein, conserved
TcCLB.507031.179	0.66039	1.58051	0.0127207	hypothetical protein, conserved
TcCLB.511821.179	0.659416	1.57944	0.00826296	hypothetical protein, conserved
TcCLB.509605.20	0.658274	1.57819	5.35006e-05	hypothetical protein, conserved
TcCLB.503999.100	0.657906	1.57779	0.0152994	phospholipid-transporting ATPase 1-like protein, putative
TcCLB.509713.30	0.654569	1.57415	5.24512e-21	hypothetical protein, conserved
TcCLB.507609.150	0.653868	1.57338	0.00253714	hypothetical protein (pseudogene)
TcCLB.508461.310	0.64681	1.5657	5.87065e-05	protein kinase A catalytic subunit isoform 1, putative
TcCLB.510217.10	0.645845	1.56466	NA	hypothetical protein
TcCLB.506355.10	0.642738	1.56129	1.6223e-16	glucose transporter
TcCLB.504021.20	0.640893	1.55929	0.00477001	hypothetical protein, conserved
TcCLB.506355.100	0.632679	1.55044	3.64663e-16	hexose transporter (pseudogene), putative
TcCLB.511317.50	0.632332	1.55007	0.0015624	hypothetical protein, conserved
TcCLB.508859.90	0.626995	1.54435	0.00326171	phosphatidylinositol 3-kinase 2, putative
TcCLB.503583.80	0.62551	1.54276	0.000357176	dual specificity protein phosphatase or MAP kinase phosphatase, putative
TcCLB.511511.150	0.625167	1.54239	5.76099e-08	sphingosine 1-phosphate lyase, putative
TcCLB.510359.290	0.624091	1.54124	0.000250665	hypothetical protein, conserved
TcCLB.511367.240	0.623009	1.54008	9.76789e-09	PIWI-like protein
TcCLB.506327.40	0.621603	1.53858	2.90363e-06	hypothetical protein, conserved
TcCLB.508153.440	0.620595	1.53751	5.85871e-07	poly(A) polymerase, putative
TcCLB.506791.10	0.616827	1.5335	0.000134139	CYC2-like cyclin 4, putative
TcCLB.506297.350	0.615758	1.53236	0.0181151	SKP1-like protein
TcCLB.504741.250	0.614723	1.53126	0.000158992	protein kinase, putative
TcCLB.511809.90	0.613892	1.53038	9.79102e-07	hypothetical protein, conserved
TcCLB.509857.40	0.613137	1.52958	0.0010389	hypothetical protein, conserved
TcCLB.508409.160	0.611362	1.5277	5.63431e-05	thymine-7-hydroxylase, putative
TcCLB.506355.5	0.61044	1.52673	8.81374e-07	hexose transporter, putative
TcCLB.508119.200	0.60698	1.52307	1.05536e-06	hypothetical protein
TcCLB.506153.20	0.606545	1.52261	1.04419e-10	amino acid transporter, putative
TcCLB.506153.10	0.603845	1.51976	2.89777e-13	amino acid transporter, putative
TcCLB.510129.11	0.601886	1.5177	5.69004e-06	Surface membrane protein (fragment)
TcCLB.424123.20	0.601112	1.51689	0.00047291	paraflagellar rod component, putative
TcCLB.511825.240	0.599029	1.5147	0.000207805	hypothetical protein, conserved
TcCLB.508543.180	0.598834	1.51449	0.00182568	hypothetical protein, conserved
TcCLB.511825.90	0.597155	1.51273	0.0115403	hypothetical protein, conserved
TcCLB.507895.31	0.596829	1.51239	0.0210283	retrotransposon hot spot protein (RHS, pseudogene), putative
TcCLB.503413.4	0.595946	1.51146	0.0201567	Present in the outer mitochondrial membrane proteome 22 (fragment)
TcCLB.508231.190	0.595691	1.5112	0.00537748	ATP-binding cassette protein subfamily G
TcCLB.510661.190	0.594644	1.5101	0.0197223	protein kinase, putative
TcCLB.511821.20	0.592105	1.50744	0.00153186	hypothetical protein, conserved
TcCLB.506297.230	0.591645	1.50696	0.0357099	hypothetical protein, conserved
TcCLB.506559.190	0.591423	1.50673	0.0012166	kinatase, putative
TcCLB.511671.130	0.590732	1.50601	0.00164329	hypothetical protein, conserved
TcCLB.508303.40	0.590045	1.50529	0.000274797	hypothetical protein, conserved
TcCLB.511725.30	0.589539	1.50477	2.38123e-05	hypothetical protein, conserved
TcCLB.506477.60	0.586991	1.50211	0.00579319	protein kinase, putative
TcCLB.509569.30	0.586765	1.50188	7.06465e-07	hypothetical protein, conserved
TcCLB.511865.90	0.586519	1.50162	0.00795085	dynein heavy chain, putative
TcCLB.506479.10	0.585456	1.50051	0.0184393	hypothetical protein, conserved
TcCLB.507085.140	0.58488	1.49991	0.0173525	mucin TcMUCII, putative
TcCLB.504223.10	0.583231	1.4982	8.97017e-08	amino acid permease, putative
TcCLB.511283.130	0.582919	1.49788	0.00615379	MEKK-related kinase 1, putative
TcCLB.511661.100	0.582688	1.49764	0.000275722	protein kinase, putative
TcCLB.508817.110	0.581047	1.49593	0.00176244	hypothetical protein, conserved
TcCLB.509001.20	0.580831	1.49571	0.000220309	hypothetical protein, conserved
TcCLB.511151.54	0.580401	1.49526	6.00671e-05	surface protease GP63, putative
TcCLB.506053.10	0.577351	1.49211	4.22582e-10	amino acid transporter, putative
TcCLB.506041.60	0.576542	1.49127	0.000405903	hypothetical protein, conserved
TcCLB.509719.40	0.574297	1.48895	3.75333e-06	cytochrome P450, putative
TcCLB.506149.10	0.574117	1.48877	7.00361e-08	folate/pteridine transporter, putative
TcCLB.506681.40	0.57264	1.48724	NA	hypothetical protein, conserved
TcCLB.504199.10	0.572007	1.48659	3.07898e-05	hypothetical protein, conserved
TcCLB.507087.70	0.571928	1.48651	0.00030408	hypothetical protein, conserved
TcCLB.510729.280	0.570785	1.48533	0.0182037	trans-sialidase, Group III, putative
TcCLB.509287.230	0.569095	1.48359	0.00178299	trans-sialidase, Group II, putative
TcCLB.508461.280	0.567588	1.48204	0.00119257	protein kinase A catalytic subunit isoform 2, putative
TcCLB.511283.240	0.567032	1.48147	5.07675e-06	hypothetical protein, conserved
TcCLB.506247.310	0.565051	1.47944	5.1554e-05	hypothetical protein, conserved
TcCLB.506229.64	0.564707	1.47909	0.0224067	conserved protein, unknown function
TcCLB.504105.100	0.563398	1.47775	0.00040751	hypothetical protein
TcCLB.506475.90	0.563277	1.47762	0.038986	hypothetical protein, conserved
TcCLB.503939.84	0.560423	1.4747	0.000213496	hypothetical protein, conserved
TcCLB.510887.30	0.560262	1.47454	0.00771851	hypothetical protein, conserved
TcCLB.511209.30	0.559514	1.47377	0.000891255	hypothetical protein, conserved (pseudogene)
TcCLB.509215.19	0.558772	1.47302	0.0142171	hypothetical protein, conserved
TcCLB.511483.10	0.556599	1.4708	0.00163563	hypothetical protein
TcCLB.507515.140	0.556037	1.47023	0.00490834	oxysterol-binding protein, putative
TcCLB.510671.10	0.55548	1.46966	0.000184011	dispersed gene family protein 1 (DGF-1), putative
TcCLB.511837.110	0.554716	1.46888	2.10825e-06	hypothetical protein, conserved
TcCLB.511245.120	0.554006	1.46816	0.00240039	hypothetical protein, conserved
TcCLB.507241.30	0.552462	1.46659	4.29452e-09	arginine kinase
TcCLB.507087.30	0.547436	1.46149	0.00513008	Peptidase C19, ubiquitin carboxyl-terminal hydrolase, putative
TcCLB.508441.30	0.546648	1.46069	NA	protein kinase, putative
TcCLB.509713.10	0.545885	1.45992	3.94561e-08	protein associated with differentiation 4, putative
TcCLB.503559.90	0.545704	1.45973	0.000322627	hypothetical protein, conserved
TcCLB.511165.100	0.544966	1.45899	0.0442415	serine/threonine protein kinase, putative
TcCLB.504003.30	0.54448	1.4585	0.000271406	hypothetical protein
TcCLB.511233.90	0.543397	1.4574	0.0204305	hypothetical protein, conserved
TcCLB.510007.20	0.542793	1.45679	0.0328615	hypothetical protein, conserved
TcCLB.506469.30	0.542521	1.45652	0.00136953	protein kinase, putative
TcCLB.509023.160	0.542287	1.45628	0.00327619	hypothetical protein, conserved
TcCLB.511511.6	0.542261	1.45625	0.0553592	zinc finger protein ZFP1
TcCLB.508957.30	0.542151	1.45614	0.00449163	hypothetical protein, conserved
TcCLB.507491.90	0.541874	1.45586	0.00148162	protein kinase, putative
TcCLB.504105.160	0.541797	1.45579	1.51737e-05	splicing factor ptsr1 interacting protein, putative
TcCLB.508613.10	0.541105	1.45509	0.0357099	hypothetical protein, conserved
TcCLB.509713.20	0.540445	1.45442	4.5617e-09	protein associated with differentiation 4, putative
TcCLB.410199.4	0.540211	1.45419	0.0573963	kinase, putative (fragment)
TcCLB.509663.37	0.540142	1.45412	0.00783635	hypothetical protein, conserved
TcCLB.507615.19	0.540134	1.45411	6.68134e-06	microtubule-associated protein, putative, (fragment)
TcCLB.508817.170	0.538306	1.45227	0.00456858	hypothetical protein, conserved
TcCLB.507019.10	0.537581	1.45154	0.00372175	protein kinase, putative
TcCLB.509859.70	0.537233	1.45119	0.00762836	hypothetical protein, conserved
TcCLB.506445.110	0.537083	1.45104	1.91822e-07	nucleobase transporter, putative
TcCLB.508891.80	0.536289	1.45024	0.014866	hypothetical protein, conserved (pseudogene)
TcCLB.507949.250	0.535689	1.44963	1.07148e-11	hypothetical protein, conserved
TcCLB.511247.9	0.533754	1.44769	NA	hypothetical protein, conserved
TcCLB.508231.9	0.53315	1.44709	1.41241e-08	hexose transporter, putative
TcCLB.510245.10	0.532368	1.4463	2.44735e-08	amino acid permease, putative
TcCLB.507073.49	0.531266	1.4452	0.00843882	hypothetical protein, conserved
TcCLB.511649.100	0.530777	1.44471	0.0309561	amino acid permease, putative
TcCLB.509017.50	0.530185	1.44411	0.000277358	hypothetical protein, conserved
TcCLB.511257.30	0.529731	1.44366	0.0142171	ras-related protein rab, putative
TcCLB.511263.30	0.529036	1.44296	0.0481851	hypothetical protein, conserved
TcCLB.509997.20	0.528526	1.44245	0.000262652	tryparedoxin 2, putative
TcCLB.508153.520	0.528079	1.44201	0.00656328	hypothetical protein, conserved (pseudogene)
TcCLB.510675.9	0.52704	1.44097	0.021302	dispersed gene family protein 1 (DGF-1), putative (fragment)
TcCLB.511633.79	0.524356	1.43829	7.91853e-06	microtubule-associated protein, putative
TcCLB.508153.950	0.524085	1.43802	0.000501184	6-phosphofructo-2-kinase 1
TcCLB.506053.5	0.5236	1.43754	8.69912e-05	amino acid transporter, putative (fragment)
TcCLB.511169.29	0.523485	1.43742	0.00221425	tubulin-tyrsoine ligase-like protein, putative
TcCLB.508801.10	0.522831	1.43677	0.00104283	protein associated with differentiation 4, putative
TcCLB.511633.70	0.522315	1.43626	0.00153919	protein kinase, putative
TcCLB.506247.370	0.522172	1.43612	0.00126885	hypothetical protein, conserved
TcCLB.511291.40	0.522159	1.4361	0.000403065	protein kinase, putative
TcCLB.507723.120	0.51656	1.43054	NA	U1A small nuclear ribonucleoprotein, putative
TcCLB.506193.5	0.516078	1.43006	0.0844511	glucose-6-phosphate 1-dehydrogenase (pseudogene), putative
TcCLB.511003.160	0.513595	1.4276	3.1716e-09	hypothetical protein, conserved
TcCLB.506549.9	0.512332	1.42635	2.12673e-06	dispersed gene family protein 1 (DGF-1), putative (fragment)
TcCLB.503413.19	0.511677	1.42571	0.0765352	hypothetical protein
TcCLB.511657.10	0.510191	1.42424	0.00826296	protein kinase, putative
TcCLB.511249.100	0.509975	1.42403	0.000275722	hypothetical protein, conserved
TcCLB.507031.170	0.50997	1.42402	0.00637835	protein kinase (pseudogene), putative
TcCLB.508873.330	0.508799	1.42287	8.81374e-07	trans-sialidase, Group V, putative
TcCLB.510679.70	0.507952	1.42203	0.000530429	lipase, putative
TcCLB.507915.10	0.507116	1.42121	0.0502472	hypothetical protein, conserved
TcCLB.509941.85	0.506516	1.42062	0.0860584	trans-sialidase (pseudogene), putative
TcCLB.511159.14	0.506273	1.42038	0.00344562	hypothetical protein, conserved
TcCLB.511661.120	0.505909	1.42002	0.00890589	protein kinase, putative
TcCLB.506151.20	0.505625	1.41974	1.24999e-05	hypothetical protein, conserved
TcCLB.511245.240	0.504567	1.4187	0.00261628	serine/threonine protein kinase, putative
TcCLB.507649.20	0.503759	1.4179	0.000165054	hypothetical protein, conserved
TcCLB.506459.219	0.5022	1.41637	0.0594349	mucin TcMUCII, putative
TcCLB.509985.10	0.501491	1.41568	0.0169896	hypothetical protein, conserved (pseudogene)
TcCLB.506319.60	0.501111	1.4153	0.000838936	hypothetical protein, conserved
TcCLB.509943.20	0.500652	1.41485	7.91424e-07	cAMP specific phosphodiesterase, putative
TcCLB.509937.120	0.500493	1.4147	0.00256417	hypothetical protein, conserved
TcCLB.506611.70	0.500436	1.41464	0.00127486	surface protease GP63, putative
TcCLB.507743.9	0.500163	1.41437	0.00355052	tyrosine protein kinase, putative
TcCLB.508027.40	0.499033	1.41327	3.75333e-06	folate/pteridine transporter, putative
TcCLB.506137.10	0.498816	1.41305	0.0243327	surface protease GP63, putative
TcCLB.510129.30	0.497738	1.412	1.94043e-05	Surface membrane protein
TcCLB.503499.30	0.497137	1.41141	0.0258194	mitochondrial carrier protein (pseudogene), putative
TcCLB.511261.80	0.496371	1.41066	0.0177779	hypothetical protein, conserved
TcCLB.504023.10	0.496082	1.41038	0.0723589	hypothetical protein, conserved
TcCLB.510045.20	0.495686	1.40999	0.0918476	ABC transporter, putative
TcCLB.506855.300	0.495541	1.40985	0.0748679	hypothetical protein, conserved
TcCLB.503919.60	0.495518	1.40983	0.007956	hypothetical protein, conserved
TcCLB.504155.150	0.495142	1.40946	0.000744593	surface protease GP63, putative
TcCLB.503847.60	0.494658	1.40899	0.00671724	hypothetical protein, conserved
TcCLB.510187.520	0.494088	1.40843	0.00140531	hypothetical protein, conserved
TcCLB.415803.10	0.493775	1.40812	0.0563709	hypothetical protein, conserved
TcCLB.508523.50	0.493247	1.40761	0.000784128	trans-sialidase, Group II, putative
TcCLB.511025.80	0.492782	1.40716	0.0186392	hypothetical protein, conserved
TcCLB.472833.10	0.49134	1.40575	NA	hypothetical protein, conserved
TcCLB.508637.130	0.49126	1.40567	0.106745	hypothetical protein, conserved
TcCLB.509593.50	0.490496	1.40493	0.0764363	retrotransposon hot spot protein (RHS, pseudogene), putative
TcCLB.511277.115	0.488861	1.40334	0.000184011	hypothetical protein, conserved
TcCLB.508867.9	0.488708	1.40319	0.101219	kinesin, putative (fragment)
TcCLB.508139.130	0.488545	1.40303	0.0177779	trans-sialidase, Group II, putative
TcCLB.511497.19	0.488452	1.40294	0.0148832	amastin, putative
TcCLB.506177.150	0.488379	1.40287	0.0386419	hypothetical protein, conserved
TcCLB.511277.554	0.487616	1.40213	0.00069475	hypothetical protein, conserved
TcCLB.511483.20	0.486502	1.40104	0.00428075	hypothetical protein, conserved
TcCLB.509747.50	0.486062	1.40062	0.000250665	hypothetical protein, conserved
TcCLB.506721.50	0.485999	1.40056	0.0988402	hypothetical protein
TcCLB.508303.20	0.48555	1.40012	0.0775466	hypothetical protein
TcCLB.510889.290	0.483861	1.39848	0.0701604	hypothetical protein
TcCLB.506621.70	0.483653	1.39828	0.00521733	hypothetical protein, conserved
TcCLB.508695.30	0.483352	1.39799	0.0266132	hypothetical protein (fragment)
TcCLB.506575.70	0.482094	1.39677	0.00137037	Present in the outer mitochondrial membrane proteome 41
TcCLB.508917.20	0.481243	1.39595	0.0175177	hypothetical protein, conserved
TcCLB.506989.10	0.479511	1.39427	5.1554e-05	hypothetical protein, conserved
TcCLB.506559.524	0.478973	1.39375	0.0282435	protein phosphatase 2C, putative
TcCLB.510331.10	0.47886	1.39364	0.068659	trans-sialidase, Group III, putative
TcCLB.503923.10	0.477641	1.39247	0.00637835	hypothetical protein, conserved
TcCLB.511283.280	0.477177	1.39202	0.0289506	Serine/threonine-protein kinase Nek1-related, putative
TcCLB.504069.34	0.477011	1.39186	0.0508318	hypothetical protein, conserved
TcCLB.507851.70	0.476932	1.39178	0.0610197	hypothetical protein
TcCLB.510187.400	0.476485	1.39135	0.00221005	serine/threonine protein phosphatase, putative
TcCLB.509105.120	0.476409	1.39128	0.0564972	protein kinase, putative
TcCLB.510339.100	0.474781	1.38971	0.0544335	UDP-Gal or UDP-GlcNAc-dependent glycosyltransferase, putative
TcCLB.507775.10	0.474758	1.38969	0.0205545	hypothetical protein, conserved
TcCLB.506619.30	0.474605	1.38954	NA	Flagellar Member 8
TcCLB.506319.40	0.474588	1.38952	0.10817	hypothetical protein
TcCLB.503635.10	0.474053	1.38901	0.046611	protein kinase, putative
TcCLB.506679.10	0.474036	1.38899	0.0860198	hypothetical protein, conserved
TcCLB.511655.50	0.472168	1.38719	0.000514487	Inositol phosphosphingolipids phospholipase C (pseudogene)
TcCLB.510121.150	0.472029	1.38706	0.00833553	serine/threonine protein kinase, putative
TcCLB.508193.60	0.470522	1.38561	0.000681298	UDP-Gal or UDP-GlcNAc-dependent glycosyltransferase, putative
TcCLB.511819.50	0.4697	1.38482	0.00119269	hypothetical protein, conserved
TcCLB.506475.110	0.469456	1.38459	0.0219584	hypothetical protein
TcCLB.506835.150	0.469016	1.38417	0.0512362	zinc-binding protein (Yippee), putative
TcCLB.506279.10	0.46839	1.38356	0.000903463	trans-sialidase, Group VI, putative
TcCLB.511903.10	0.468309	1.38349	0.0491156	hypothetical protein
TcCLB.506559.129	0.468152	1.38334	0.110731	Eukaryotic translation initiation factor 2-alpha kinase 2
TcCLB.508409.310	0.467677	1.38288	0.0573963	hypothetical protein, conserved
TcCLB.509755.89	0.467608	1.38282	NA	hypothetical protein
TcCLB.511759.40	0.467047	1.38228	0.078858	hypothetical protein, conserved
TcCLB.510901.170	0.465339	1.38064	0.00698727	hypothetical protein, conserved
TcCLB.509001.30	0.46504	1.38036	0.000664767	hypothetical protein, conserved
TcCLB.508659.30	0.464514	1.37985	0.0845472	hypothetical protein, conserved
TcCLB.509053.170	0.464478	1.37982	1.73454e-06	DREV methyltransferase, putative
TcCLB.508257.70	0.46407	1.37943	0.00160213	phosphomannomutase-like protein, putative
TcCLB.508301.10	0.463374	1.37876	0.00567128	hypothetical protein, conserved
TcCLB.509799.120	0.463354	1.37874	0.0993854	hypothetical protein, conserved
TcCLB.511813.20	0.463308	1.3787	0.00397635	ubiquitin-conjugating enzyme E2, putative
TcCLB.507087.14	0.462688	1.37811	0.0629282	hypothetical protein, conserved
TcCLB.504199.20	0.462337	1.37777	0.000158992	hypothetical protein, conserved
TcCLB.508503.60	0.462194	1.37764	0.0953342	protein kinase, putative
TcCLB.510359.90	0.461308	1.37679	0.0367303	hypothetical protein, conserved
TcCLB.504105.250	0.460803	1.37631	0.0224597	hypothetical protein
TcCLB.510655.10	0.459814	1.37536	0.0413805	hypothetical protein, conserved
TcCLB.506621.30	0.459591	1.37515	4.74456e-05	ribonucleoside-diphosphate reductase small chain, putative
TcCLB.511905.9	0.457318	1.37299	NA	hypothetical protein, conserved
TcCLB.504015.30	0.457164	1.37284	0.000338509	surface protease GP63, putative
TcCLB.508267.50	0.456621	1.37232	0.0359786	hypothetical protein, conserved
TcCLB.510483.224	0.456556	1.37226	0.0753029	mucin TcMUCII (pseudogene), putative
TcCLB.508933.20	0.456516	1.37222	0.0410416	dihydrolipoamide dehydrogenase, putative
TcCLB.509003.40	0.455448	1.37121	0.00562556	small myristoylated protein 1-2
TcCLB.510835.10	0.455228	1.371	NA	hypothetical protein, conserved
TcCLB.503973.300	0.454966	1.37075	NA	surface protease GP63 (pseudogene), putative
TcCLB.511929.20	0.454211	1.37003	0.0321058	dispersed gene family protein 1 (DGF-1, pseudogene), putative
TcCLB.509639.10	0.454147	1.36997	0.000260247	Surface membrane protein
TcCLB.510081.40	0.453641	1.36949	0.0859224	trans-sialidase (pseudogene), putative
TcCLB.503687.40	0.453499	1.36936	4.73138e-05	40 kDa cyclophilin, putative
TcCLB.504207.29	0.453302	1.36917	0.0805599	hypothetical protein, conserved
TcCLB.508525.60	0.452164	1.36809	0.0191766	hypothetical protein, conserved
TcCLB.508897.70	0.451713	1.36766	0.0280825	ADP-ribosylation factor family, putative
TcCLB.507895.160	0.451654	1.36761	0.0265326	hypothetical protein, conserved
TcCLB.510887.64	0.451318	1.36729	0.0301394	hypothetical protein, conserved
TcCLB.508593.130	0.451116	1.3671	0.00143838	hypothetical protein, conserved
TcCLB.511897.19	0.451095	1.36708	0.0615386	zinc-finger multi-pass transmembrane protein, putative
TcCLB.508979.80	0.451083	1.36707	0.0241217	hypothetical protein, conserved
TcCLB.510693.200	0.45021	1.36624	0.00381554	mucin TcMUCII, putative
TcCLB.510359.490	0.449752	1.36581	0.00823339	trans-sialidase (pseudogene), putative
TcCLB.506425.80	0.449714	1.36577	0.0481851	phosphatidylinositol kinase, putative
TcCLB.511865.40	0.44934	1.36542	2.88251e-05	hypothetical protein, conserved
TcCLB.511267.24	0.448797	1.3649	0.047934	hypothetical protein, conserved
TcCLB.508303.30	0.44874	1.36485	0.0204456	hypothetical protein, conserved
TcCLB.509027.60	0.44831	1.36444	0.021819	kinetoplastid kinetochore protein 10, putative
TcCLB.509525.210	0.447619	1.36379	NA	hypothetical protein
TcCLB.509629.10	0.447187	1.36338	7.92559e-06	trans-sialidase, Group III, putative
TcCLB.508625.160	0.446787	1.363	0.00902733	pumilio/PUF RNA binding protein 1, putative
TcCLB.509429.260	0.446443	1.36268	0.0207691	hypothetical protein, conserved
TcCLB.507889.20	0.446302	1.36254	0.0531309	hypothetical protein, conserved
TcCLB.507031.110	0.446265	1.36251	0.0191766	hypothetical protein, conserved
TcCLB.511277.140	0.445565	1.36185	0.0347274	serine/threonine protein kinase, putative
TcCLB.508027.80	0.445003	1.36132	0.0196544	hypothetical protein, conserved
TcCLB.510357.30	0.444803	1.36113	0.00521092	hypothetical protein, conserved
TcCLB.511661.20	0.444687	1.36102	0.0118163	hypothetical protein, conserved
TcCLB.511517.30	0.444655	1.36099	0.00245139	hypothetical protein, conserved
TcCLB.504209.10	0.444117	1.36048	0.0801509	conserved protein, unknown function
TcCLB.510885.10	0.443236	1.35965	0.00182568	hypothetical protein, conserved
TcCLB.509527.90	0.442812	1.35925	0.0109769	trans-sialidase (pseudogene), putative
TcCLB.509557.10	0.442754	1.3592	0.0597422	hypothetical protein
TcCLB.506577.80	0.44263	1.35908	0.122251	trans-sialidase, Group VIII, putative
TcCLB.508457.40	0.442417	1.35888	0.0505973	hypothetical protein
TcCLB.508905.20	0.442301	1.35877	0.047166	hypothetical protein, conserved (pseudogene)
TcCLB.506123.70	0.44208	1.35856	0.0140243	hypothetical protein, conserved
TcCLB.503411.10	0.44146	1.35798	0.000255108	hypothetical protein
TcCLB.508153.680	0.440375	1.35696	NA	RNA-binding protein 6, putative
TcCLB.506999.120	0.440256	1.35685	0.0174021	hypothetical protein, conserved
TcCLB.506985.50	0.439949	1.35656	0.0433201	hypothetical protein, conserved
TcCLB.507491.70	0.43993	1.35654	NA	hypothetical protein, conserved (pseudogene)
TcCLB.510201.5	0.439822	1.35644	NA	Mucin-associated surface protein (MASP)
TcCLB.503781.30	0.439656	1.35628	0.0425501	hypothetical protein, conserved
TcCLB.511909.30	0.439408	1.35605	0.00557008	hypothetical protein, conserved
TcCLB.508799.230	0.439316	1.35596	0.0121045	hypothetical protein, conserved
TcCLB.509429.240	0.438605	1.35529	0.0160426	hypothetical protein, conserved
TcCLB.507949.210	0.437517	1.35427	NA	trans-sialidase, Group II, putative
TcCLB.508815.10	0.436408	1.35323	0.144853	hypothetical protein, conserved
TcCLB.508543.20	0.435896	1.35275	0.0092319	protein kinase, putative
TcCLB.425855.9	0.43588	1.35274	0.0530009	hypothetical protein, conserved (fragment)
TcCLB.508153.260	0.434656	1.35159	0.0715224	hypothetical protein, conserved
TcCLB.507233.110	0.432504	1.34957	0.000731339	mismatch repair protein MSH4, putative
TcCLB.511817.60	0.432313	1.3494	0.0977552	hypothetical protein, conserved
TcCLB.511897.10	0.431918	1.34903	0.0864737	TFIIH basal transcription factor complex helicase subunit, putative
TcCLB.507069.60	0.431697	1.34882	0.13485	mucin TcMUCII, putative
TcCLB.510329.210	0.430985	1.34815	0.00525606	5'-AMP-activated protein kinase catalytic subunit alpha, putative
TcCLB.510819.100	0.430002	1.34724	0.0121482	mitochondrial carrier protein, putative
TcCLB.511295.20	0.429912	1.34715	NA	hypothetical protein, conserved
TcCLB.508815.179	0.429817	1.34706	0.00744525	dynein heavy chain, putative (fragment)
TcCLB.503431.90	0.428942	1.34625	0.0338052	hypothetical protein, conserved
TcCLB.507049.66	0.428386	1.34573	0.0826032	hypothetical protein
TcCLB.507715.70	0.428077	1.34544	0.0133821	hypothetical protein, conserved
TcCLB.506573.50	0.42785	1.34523	0.000661854	hypothetical protein, conserved
TcCLB.508815.40	0.427698	1.34509	0.0258194	hypothetical protein, conserved
TcCLB.508405.70	0.427653	1.34504	1.5658e-08	protein kinase, putative
TcCLB.510567.10	0.42764	1.34503	0.0505973	trans-sialidase, putative (fragment)
TcCLB.508909.150	0.427445	1.34485	0.105824	hypothetical protein, conserved
TcCLB.510689.60	0.427188	1.34461	0.00671724	Double RNA binding domain protein 7
TcCLB.506275.110	0.426657	1.34412	NA	hypothetical protein
TcCLB.510667.120	0.426055	1.34355	0.00169221	galactokinase, putative
TcCLB.506855.320	0.425461	1.343	0.010087	hypothetical protein, conserved
TcCLB.504827.130	0.425155	1.34272	0.0628045	eukaryotic translation initiation factor 4 gamma 4
TcCLB.510669.40	0.424738	1.34233	4.64231e-06	hypothetical protein
TcCLB.511657.20	0.424635	1.34223	0.00309923	protein kinase, putative
TcCLB.511277.560	0.42457	1.34217	0.0626849	synaptotagmin, putative
TcCLB.506425.10	0.424426	1.34204	0.0857751	serine carboxypeptidase S28, putative
TcCLB.507087.10	0.424385	1.342	NA	hydrolase-like protein (pseudogene), putative
TcCLB.504021.74	0.424359	1.34198	0.0544255	hypothetical protein, conserved
TcCLB.508419.20	0.424273	1.3419	0.000211435	dispersed gene family protein 1 (DGF-1, pseudogene), putative
TcCLB.509717.60	0.423754	1.34141	0.00963585	metallo-peptidase, Clan MA(E) Family M41
TcCLB.509049.30	0.423713	1.34138	0.000517242	hypothetical protein, conserved
TcCLB.507023.70	0.423092	1.3408	0.000615855	hypothetical protein, conserved
TcCLB.509429.329	0.423057	1.34077	8.74148e-07	cruzipain precursor, putative (fragment)
TcCLB.511299.60	0.422773	1.3405	0.142593	hypothetical protein, conserved
TcCLB.506275.60	0.421751	1.33955	0.0149932	metallo-peptidase, Clan MC, Family M14, putative
TcCLB.509037.20	0.42108	1.33893	0.0845416	surface protease GP63, putative
TcCLB.508153.970	0.421064	1.33891	0.123419	AGC/RSK family serine/threonine kinase, putative
TcCLB.508153.740	0.420887	1.33875	0.0160426	hypothetical protein
TcCLB.508959.10	0.420762	1.33863	0.0990586	hypothetical protein, conserved
TcCLB.509229.20	0.420672	1.33855	0.00783739	hypothetical protein, conserved
TcCLB.458241.10	0.420263	1.33817	NA	hypothetical protein, conserved
TcCLB.507765.20	0.42024	1.33815	0.000500288	PUF nine target 1
TcCLB.503703.100	0.419047	1.33704	0.0142477	hypothetical protein, conserved
TcCLB.503617.20	0.418741	1.33676	0.0501674	kinetoplast DNA-associated protein, putative
TcCLB.508139.160	0.418551	1.33658	0.158325	expression site-associated gene (ESAG-like) protein, putative
TcCLB.509937.200	0.41853	1.33656	0.000364616	hypothetical protein, conserved
TcCLB.506709.10	0.418236	1.33629	0.0343979	hypothetical protein, conserved
TcCLB.511909.60	0.417561	1.33567	0.105806	hypothetical protein, conserved
TcCLB.511491.9	0.416982	1.33513	0.0408326	hypothetical protein, conserved
TcCLB.503825.19	0.416591	1.33477	0.0794242	protein kinase, putative
TcCLB.511511.5	0.416523	1.33471	0.174466	hypothetical protein
TcCLB.507007.37	0.416119	1.33433	0.142735	hypothetical protein, conserved
TcCLB.510889.200	0.415793	1.33403	0.0386419	hypothetical protein, conserved
TcCLB.509693.20	0.415355	1.33363	3.04611e-05	plectin, putative
TcCLB.511821.170	0.414694	1.33302	0.0849146	hypothetical protein, conserved
TcCLB.510889.261	0.414155	1.33252	0.0854581	cruzipain precursor, putative
TcCLB.509571.60	0.413907	1.33229	0.081368	hypothetical protein, conserved
TcCLB.503461.20	0.413378	1.3318	0.00348756	per-hexamer repeat protein 5, putative
TcCLB.506789.150	0.413095	1.33154	0.000813916	hypothetical protein
TcCLB.511385.110	0.412982	1.33144	0.0508217	hypothetical protein
TcCLB.511649.30	0.412416	1.33091	0.0937702	hypothetical protein, conserved
TcCLB.404845.10	0.412101	1.33062	0.075347	trans-sialidase (pseudogene), putative
TcCLB.508817.5	0.411855	1.3304	0.0703285	dynein heavy chain, putative
TcCLB.507681.100	0.411848	1.33039	0.0216794	ATP-binding cassette protein, putative
TcCLB.507897.30	0.411538	1.3301	0.000412262	serine/threonine-protein kinase a, putative
TcCLB.508017.30	0.411064	1.32967	2.17635e-06	amino acid transporter, putative (fragment)
TcCLB.511259.50	0.410373	1.32903	0.01504	trans-sialidase (pseudogene), putative
TcCLB.511267.20	0.410058	1.32874	0.177963	hypothetical protein, conserved
TcCLB.511385.90	0.409137	1.32789	0.00253103	hypothetical protein, conserved
TcCLB.511903.90	0.409024	1.32779	0.0811204	hypothetical protein, conserved
TcCLB.509211.30	0.408936	1.32771	0.080667	serine/threonine protein phosphatase, putative
TcCLB.511277.110	0.408429	1.32724	0.134673	citrate synthase, putative
TcCLB.508199.70	0.408398	1.32721	0.0163942	hypothetical protein
TcCLB.509879.40	0.408265	1.32709	9.2117e-05	fumarate hydratase, putative
TcCLB.504741.40	0.408206	1.32703	0.0505122	hypothetical protein, conserved
TcCLB.509317.50	0.408169	1.327	0.152099	dolichyl-P-Man:GDP-Man7GlcNAc2-PP-dolichyl alpha-1,6-mannosyltransferase, putative
TcCLB.504067.10	0.408027	1.32687	NA	dispersed gene family protein 1 (DGF-1), putative
TcCLB.507951.154	0.407828	1.32669	0.0796305	cytochrome b5, putative
TcCLB.508079.10	0.407195	1.32611	0.0399256	conserved protein
TcCLB.511909.50	0.406996	1.32592	0.072154	hypothetical protein, conserved
TcCLB.508821.30	0.406937	1.32587	0.00545603	hypothetical protein
TcCLB.511033.29	0.406469	1.32544	0.203569	hypothetical protein
TcCLB.508247.70	0.406411	1.32538	NA	mucin TcMUCII, putative
TcCLB.508823.100	0.406277	1.32526	0.000469091	hypothetical protein, conserved
TcCLB.509647.180	0.405797	1.32482	0.00120122	nicotinate phosphoribosyltransferase, putative
TcCLB.507687.70	0.405784	1.32481	NA	Mucin-associated surface protein (MASP), subgroup S103
TcCLB.511383.80	0.405314	1.32438	0.0389339	hypothetical protein, conserved
TcCLB.508411.50	0.40455	1.32368	0.0944988	hypothetical protein, conserved
TcCLB.506469.10	0.404305	1.32345	0.169615	hypothetical protein, conserved
TcCLB.508409.80	0.40421	1.32336	0.000363802	hypothetical protein, conserved
TcCLB.511809.10	0.403586	1.32279	0.0126497	hypothetical protein
TcCLB.508153.160	0.403382	1.32261	0.184251	hypothetical protein, conserved
TcCLB.509003.30	0.403372	1.3226	1.13087e-05	small myristoylated protein 1-1
TcCLB.511907.130	0.402642	1.32193	NA	mucin-like glycoprotein, putative
TcCLB.510355.250	0.40232	1.32163	0.0623747	hypothetical protein, conserved
TcCLB.511235.10	0.402036	1.32137	0.203667	hypothetical protein, conserved (pseudogene)
TcCLB.510359.190	0.401918	1.32126	0.0467883	hypothetical protein, conserved
TcCLB.508409.90	0.401719	1.32108	0.000190621	hypothetical protein, conserved
TcCLB.509663.44	0.401476	1.32086	0.217872	hypothetical protein, conserved
TcCLB.509429.320	0.401438	1.32082	1.81656e-05	cysteine peptidase, putative
TcCLB.510915.10	0.401381	1.32077	0.201527	Mucin-associated surface protein (MASP), subgroup S008
TcCLB.508677.40	0.400993	1.32042	0.210135	trans-sialidase, Group VIII, putative
TcCLB.510001.20	0.400603	1.32006	0.00366751	hypothetical protein, conserved
TcCLB.506681.70	0.400601	1.32006	0.0962596	serine-threonine dehydratase, putative
TcCLB.511323.60	0.400485	1.31995	0.0212784	hypothetical protein, conserved
TcCLB.508415.20	0.400424	1.3199	0.0395191	hypothetical protein, conserved
TcCLB.510825.30	0.400351	1.31983	0.00585471	lysosomal/endosomal membrane protein p67
TcCLB.511269.10	0.400256	1.31974	0.00216037	hypothetical protein, conserved
TcCLB.508799.280	0.400063	1.31957	0.00147745	protein associated with differentiation 4, putative
TcCLB.511859.80	0.39936	1.31892	0.000785928	hypothetical protein
TcCLB.511269.50	0.399181	1.31876	0.222866	protein kinase A catalytic subunit 3
TcCLB.509859.20	0.39917	1.31875	0.112509	hypothetical protein, conserved
TcCLB.508739.40	0.399089	1.31867	0.000351706	hypothetical protein, conserved
TcCLB.506201.170	0.398552	1.31818	0.223626	Flagellar attachment zone protein 1, putative
TcCLB.507587.24	0.398147	1.31781	0.00499124	dispersed gene family protein 1 (DGF-1), putative (fragment)
TcCLB.507801.110	0.397944	1.31763	0.00498465	hypothetical protein, conserved
TcCLB.504113.20	0.397688	1.3174	0.00973298	MYH7B protein, putative
TcCLB.508945.10	0.397479	1.3172	0.012266	hypothetical protein, conserved
TcCLB.510653.19	0.397243	1.31699	0.0816048	hypothetical protein, conserved (fragment)
TcCLB.506327.80	0.397186	1.31694	0.0495537	serine/threonine protein kinase, putative
TcCLB.504533.50	0.397072	1.31683	0.000983991	hypothetical protein, conserved
TcCLB.507081.90	0.396712	1.3165	0.0427476	hypothetical protein, conserved
TcCLB.506009.100	0.396493	1.3163	0.0879574	ADP-ribosylation factor-like protein, putative
TcCLB.472777.30	0.396153	1.31599	0.0726064	protein disulfide isomerase, putative
TcCLB.506613.9	0.396146	1.31599	0.0263051	surface protease GP63, putative (fragment)
TcCLB.509027.50	0.396056	1.31591	0.0805724	hypothetical protein, conserved
TcCLB.511725.40	0.395897	1.31576	0.100942	hypothetical protein, conserved
TcCLB.511295.60	0.39582	1.31569	0.0102018	hypothetical protein, conserved (pseudogene)
TcCLB.509791.30	0.395759	1.31563	0.051755	hypothetical protein, conserved
TcCLB.510715.120	0.394555	1.31454	0.224801	mucin TcMUCII, putative
TcCLB.511511.3	0.394416	1.31441	NA	zinc finger protein ZFP1
TcCLB.503593.30	0.394341	1.31434	0.0037782	hypothetical protein, conserved
TcCLB.511523.70	0.39411	1.31413	0.0259681	FUN14 family, putative
TcCLB.508461.40	0.393971	1.31401	0.00880314	hypothetical protein, conserved
TcCLB.509611.20	0.393402	1.31349	0.022671	peptidyl-prolyl cis-trans isomerase
TcCLB.508221.910	0.393279	1.31338	NA	mucin TcMUCII, putative
TcCLB.506041.20	0.393089	1.3132	0.107794	hypothetical protein, conserved
TcCLB.511367.180	0.393017	1.31314	0.00288791	hypothetical protein
TcCLB.510695.10	0.392861	1.31299	NA	surface protease GP63 (pseudogene), putative
TcCLB.509695.90	0.392813	1.31295	0.0110327	intraflagellar transport protein 172, putative
TcCLB.506323.10	0.392012	1.31222	0.00706878	dispersed gene family protein 1 (DGF-1, pseudogene), putative
TcCLB.503861.40	0.391991	1.3122	0.00415571	trans-sialidase, Group VIII, putative
TcCLB.509695.220	0.391923	1.31214	1.4115e-05	serine carboxypeptidase (CBP1), putative
TcCLB.508965.50	0.39144	1.3117	0.005162	hypothetical protein, conserved
TcCLB.508263.30	0.390847	1.31116	0.0224725	kinesin, putative
TcCLB.511517.60	0.390672	1.311	0.00754393	C-1-tetrahydrofolate synthase, cytoplasmic, putative
TcCLB.510437.10	0.390483	1.31083	0.0564972	dynein heavy chain, putative
TcCLB.510729.110	0.39028	1.31065	0.044059	meiotic recombination protein DMC1, putative
TcCLB.506201.80	0.390162	1.31054	0.00289089	serine/threonine-protein phosphatase PP1, putative
TcCLB.509109.140	0.389526	1.30996	0.126672	hypothetical protein, conserved
TcCLB.508669.21	0.389248	1.30971	0.156684	hypothetical protein
TcCLB.508273.60	0.388523	1.30905	0.0153912	hypothetical protein, conserved
TcCLB.508637.40	0.388334	1.30888	0.00488388	hypothetical protein, conserved
TcCLB.510007.50	0.388288	1.30884	0.231553	hypothetical protein, conserved
TcCLB.507609.40	0.388104	1.30867	3.46716e-06	delta-4 fatty acid desaturase, putative
TcCLB.509229.50	0.387859	1.30845	0.140501	hypothetical protein
TcCLB.509053.10	0.387763	1.30836	0.0632282	ubiquitin-protein ligase, putative
TcCLB.511255.80	0.387558	1.30818	0.1483	Mucin-associated surface protein (MASP), subgroup S030
TcCLB.506295.60	0.387129	1.30779	0.0657768	hypothetical protein, conserved
TcCLB.505171.109	0.386949	1.30763	0.178023	Present in the outer mitochondrial membrane proteome 17 (fragment)
TcCLB.510359.30	0.386634	1.30734	0.0821637	hypothetical protein, conserved
TcCLB.424937.10	0.386604	1.30731	0.00292893	glucose transporter, putative
TcCLB.508873.40	0.386505	1.30722	0.220728	mucin TcMUCII (pseudogene), putative
TcCLB.509717.9	0.386428	1.30715	0.0909531	hypothetical protein (pseudogene)
TcCLB.503563.20	0.385684	1.30648	0.047934	ADG2, putative
TcCLB.503655.20	0.385169	1.30601	0.0516352	dispersed gene family protein 1 (DGF-1), putative
TcCLB.510901.180	0.384694	1.30558	0.168336	hypothetical protein, conserved
TcCLB.510329.370	0.384606	1.3055	0.0977552	hypothetical protein, conserved
TcCLB.510693.310	0.384104	1.30505	NA	syntaxin binding protein (pseudogene), putative
TcCLB.508999.250	0.383714	1.3047	0.00140539	calpain-like cysteine peptidase (pseudogene), putative
TcCLB.509207.80	0.382882	1.30394	0.182997	glycogen synthase kinase-3 alpha, putative
TcCLB.508879.20	0.381928	1.30308	0.0755547	hypothetical protein
TcCLB.510689.80	0.38192	1.30307	0.166155	hypothetical protein, conserved
TcCLB.508965.70	0.381768	1.30294	NA	hypothetical protein, conserved
TcCLB.510681.20	0.381639	1.30282	0.158231	myosin heavy chain kinase A, putative
TcCLB.511461.20	0.381494	1.30269	1.75105e-05	tyrosine aminotransferase
TcCLB.506303.120	0.381414	1.30262	0.0173809	hypothetical protein, conserved
TcCLB.508221.1010	0.381404	1.30261	0.143356	Mucin-associated surface protein (MASP), subgroup S025
TcCLB.508919.94	0.38103	1.30227	0.0830768	hypothetical protein, conserved
TcCLB.509695.210	0.380998	1.30224	3.60051e-06	serine carboxypeptidase (CBP1), putative
TcCLB.509085.50	0.380729	1.302	0.0112346	trans-sialidase (pseudogene), putative
TcCLB.509027.70	0.380456	1.30175	0.02103	kinetoplastid kinetochore protein 19, putative
TcCLB.509023.50	0.380104	1.30144	0.0273984	kinesin, putative
TcCLB.426897.10	0.380021	1.30136	0.00488661	hypothetical protein
TcCLB.508911.60	0.379676	1.30105	0.00259622	hypothetical protein, conserved
TcCLB.511289.50	0.37956	1.30094	0.023889	mitogen-activated protein kinase 9, putative
TcCLB.509637.18	0.379481	1.30087	0.160331	hypothetical protein, conserved
TcCLB.511909.70	0.379196	1.30062	0.00698727	hypothetical protein, conserved
TcCLB.509161.130	0.379182	1.3006	0.0410416	ATP- dependent RNA helicase, putative
TcCLB.507515.90	0.379154	1.30058	0.0224429	hypothetical protein, conserved
TcCLB.508153.270	0.379004	1.30044	0.00244838	heat shock protein 20, putative
TcCLB.504533.40	0.378895	1.30035	0.0138852	trans-sialidase, Group IV, putative
TcCLB.508637.160	0.378855	1.30031	0.230645	dual specificity protein phosphatase, putative
TcCLB.506009.20	0.378252	1.29977	0.0124747	hypothetical protein, conserved
TcCLB.507063.170	0.378056	1.29959	NA	hypothetical protein
TcCLB.511259.170	0.377516	1.2991	0.0485766	trans-sialidase (pseudogene), putative
TcCLB.508865.4	0.377306	1.29891	0.186067	protein phosphatase 2C, putative
TcCLB.508231.120	0.376499	1.29819	0.12015	trans-sialidase (pseudogene), putative
TcCLB.511849.10	0.376486	1.29818	0.0505973	mucin TcMUCI, putative
TcCLB.503635.89	0.376247	1.29796	0.16449	hypothetical protein, conserved
TcCLB.508909.330	0.37546	1.29725	0.0357112	protein kinase, putative
TcCLB.506921.10	0.375125	1.29695	0.183369	surface protease GP63, putative
TcCLB.509999.120	0.37472	1.29659	0.221104	RNA-binding protein, putative
TcCLB.503973.40	0.374628	1.29651	0.145787	dispersed gene family protein 1 (DGF-1), putative
TcCLB.511249.80	0.374304	1.29621	0.103459	hypothetical protein, conserved
TcCLB.505193.10	0.374285	1.2962	0.11898	serine/threonine protein phosphatase-like protein, putative
TcCLB.507071.340	0.374217	1.29614	0.153536	hypothetical protein
TcCLB.503481.20	0.374015	1.29595	0.0223878	UDP-Gal or UDP-GlcNAc-dependent glycosyltransferase, putative
TcCLB.503411.4	0.373469	1.29546	NA	hypothetical protein, conserved
TcCLB.510155.270	0.373394	1.2954	0.113595	dispersed gene family protein 1 (DGF-1, pseudogene), putative
TcCLB.505267.60	0.37336	1.29537	0.215736	trans-sialidase (pseudogene), putative
TcCLB.511671.110	0.372772	1.29484	0.101188	hypothetical protein, conserved
TcCLB.508917.30	0.372621	1.2947	0.00963585	kinesin, putative
TcCLB.511829.10	0.372544	1.29463	0.0536301	dispersed gene family protein 1 (DGF-1), putative
TcCLB.510483.300	0.372295	1.29441	0.110602	mucin TcMUCII, putative
TcCLB.506319.70	0.371457	1.29366	NA	hypothetical protein
TcCLB.506559.530	0.371015	1.29326	0.0618532	protein phosphatase 2C, putative
TcCLB.510661.260	0.370997	1.29325	0.0127319	hypothetical protein, conserved
TcCLB.506977.10	0.370565	1.29286	0.26477	dual specificity protein phosphatase, putative
TcCLB.508175.340	0.370472	1.29278	0.134642	hypothetical protein, conserved
TcCLB.506853.50	0.370266	1.29259	0.00627614	2-oxoisovalerate dehydrogenase alpha subunit, putative
TcCLB.511261.130	0.370165	1.2925	0.129767	hypothetical protein, conserved
TcCLB.507951.250	0.369974	1.29233	0.172949	tRNA isopentenyltransferase, putative
TcCLB.509695.230	0.369464	1.29187	0.000808235	serine carboxypeptidase (CBP1), putative (fragment)
TcCLB.504253.50	0.369263	1.29169	0.0483972	hypothetical protein, conserved
TcCLB.510479.40	0.369261	1.29169	0.101188	trans-sialidase, putative (fragment)
TcCLB.509637.36	0.368975	1.29144	0.119128	Surface membrane protein (fragment)
TcCLB.509897.155	0.368728	1.29121	0.235022	trans-sialidase (pseudogene), putative
TcCLB.511495.30	0.368055	1.29061	0.0350123	hypothetical protein, conserved
TcCLB.509647.80	0.368005	1.29057	0.047364	hypothetical protein, conserved
TcCLB.508153.140	0.368002	1.29056	0.18187	mitogen-activated protein kinase kinase 1
TcCLB.511289.110	0.367792	1.29038	0.0981056	centrosomal protein of 104 kDa
TcCLB.432629.10	0.367748	1.29034	0.234637	trans-sialidase (pseudogene), putative
TcCLB.511825.66	0.36758	1.29019	0.273514	hypothetical protein, conserved
TcCLB.511261.100	0.366934	1.28961	0.131568	chaperone DNAJ protein, putative
TcCLB.508521.50	0.366665	1.28937	NA	surface protease GP63 (pseudogene), putative
TcCLB.507073.30	0.36658	1.28929	0.0241358	hypothetical protein, conserved
TcCLB.503809.158	0.366135	1.2889	0.240332	Triglyceride lipase, putative (fragment)
TcCLB.508919.40	0.365509	1.28834	0.0102001	hypothetical protein, conserved
TcCLB.508963.20	0.365274	1.28813	0.05693	small GTP-binding protein Rab18, putative
TcCLB.509053.30	0.365245	1.2881	0.00114055	hypothetical protein, conserved
TcCLB.510657.20	0.364903	1.28779	NA	ubiquitin hydrolase, putative
TcCLB.504177.20	0.364677	1.28759	0.0132823	fatty acyl CoA synthetase 2, putative
TcCLB.508365.80	0.36464	1.28756	NA	hypothetical protein
TcCLB.505999.140	0.364334	1.28729	0.0564226	Metal-binding domain-containing protein
TcCLB.509915.50	0.364171	1.28714	0.0446402	trans-sialidase (pseudogene), putative
TcCLB.511167.110	0.364117	1.28709	0.0127197	hypothetical protein, conserved
TcCLB.508639.10	0.363317	1.28638	0.0938114	trans-sialidase, putative
TcCLB.510941.3	0.363054	1.28615	0.0765352	protein kinase, putative (fragment)
TcCLB.508461.570	0.362604	1.28574	0.00134899	Gim5A protein, putative
TcCLB.510569.10	0.362602	1.28574	0.103459	trans-sialidase, putative
TcCLB.508545.40	0.362495	1.28565	0.00162838	surface protease GP63, putative
TcCLB.503769.20	0.36241	1.28557	0.186803	trans-sialidase (pseudogene), putative
TcCLB.511301.80	0.362318	1.28549	0.00364325	choline/carnitine O-acyltransferase (pseudogene), putative
TcCLB.508909.170	0.362027	1.28523	0.167675	hypothetical protein, conserved
TcCLB.506279.60	0.361923	1.28514	0.0156942	trans-sialidase, Group VI, putative
TcCLB.503879.90	0.361841	1.28507	0.021352	hypothetical protein, conserved
TcCLB.509065.180	0.361719	1.28496	0.0212784	protein kinase-like protein, putative
TcCLB.508061.154	0.361353	1.28463	0.141101	trans-sialidase, putative (fragment)
TcCLB.508461.240	0.361332	1.28461	0.0233641	chaperone protein DNAJ, putatative
TcCLB.510187.40	0.361313	1.28459	6.41086e-05	tyrosine aminotransferase
TcCLB.508855.10	0.361187	1.28448	0.0894249	trans-sialidase, putative
TcCLB.510669.20	0.361095	1.2844	0.000123482	Gim5A protein, putative
TcCLB.509437.103	0.361081	1.28439	0.0309232	dispersed gene family protein 1 (DGF-1, pseudogene), putative
TcCLB.511843.40	0.361009	1.28432	0.064202	dispersed gene family protein 1 (DGF-1), putative
TcCLB.510079.49	0.360643	1.284	0.068659	dispersed gene family protein 1 (DGF-1), putative (fragment)
TcCLB.503791.20	0.360474	1.28385	0.199559	hypothetical protein, conserved
TcCLB.509029.80	0.360253	1.28365	0.00789437	hypothetical protein
TcCLB.504081.330	0.360139	1.28355	0.168562	mucin TcMUCII, putative
TcCLB.507209.60	0.360108	1.28352	0.0290599	hypothetical protein, conserved
TcCLB.506151.10	0.359839	1.28328	0.0860584	hypothetical protein, conserved
TcCLB.506241.19	0.359783	1.28323	0.0781738	dispersed gene family protein 1 (DGF-1), putative
TcCLB.503723.20	0.359367	1.28286	0.134848	hypothetical protein, conserved
TcCLB.509105.100	0.359291	1.2828	0.0640654	Enriched in surface-labeled proteome protein 15
TcCLB.508355.5	0.359252	1.28276	NA	receptor-type adenylate cyclase, putative (fragment)
TcCLB.507643.50	0.358562	1.28215	0.0514358	dispersed gene family protein 1 (DGF-1), putative
TcCLB.511237.30	0.358023	1.28167	0.0285421	Proline dehydrogenase, mitochondrial
TcCLB.510187.50	0.357808	1.28148	9.1641e-05	tyrosine aminotransferase
TcCLB.510359.120	0.357722	1.2814	0.101886	hypothetical protein, conserved (pseudogene)
TcCLB.509395.100	0.357717	1.2814	0.00161798	cytochrome b-domain protein, putative
TcCLB.508871.140	0.357516	1.28122	0.109085	mucin TcMUCII, putative
TcCLB.503735.49	0.356943	1.28071	0.0725575	hypothetical protein, conserved
TcCLB.505207.10	0.356479	1.2803	0.200804	trans-sialidase, Group VII, putative
TcCLB.507087.60	0.356473	1.28029	0.280396	hypothetical protein, conserved
TcCLB.511847.40	0.356388	1.28022	0.255258	hypothetical protein, conserved
TcCLB.505193.60	0.356294	1.28013	NA	hypothetical protein, conserved
TcCLB.507851.30	0.356139	1.28	0.0494163	Rapamycin-insensitive companion of TOR2
TcCLB.506083.20	0.355874	1.27976	0.0654258	trans-sialidase (pseudogene), putative
TcCLB.503773.20	0.355829	1.27972	0.0455278	hypothetical protein, conserved
TcCLB.504113.41	0.355476	1.27941	0.276478	hypothetical protein, conserved (fragment)
TcCLB.508435.60	0.355465	1.2794	0.151813	mucin TcMUCII, putative
TcCLB.511825.190	0.355267	1.27922	0.0844791	hypothetical protein, conserved
TcCLB.509331.90	0.354837	1.27884	0.0203309	5'-AMP-activated protein kinase subunit beta, putative
TcCLB.511385.14	0.354132	1.27822	0.00897136	hypothetical protein, conserved (fragment)
TcCLB.509113.10	0.354121	1.27821	0.0849618	Mucin-associated surface protein (MASP) (pseudogene)
TcCLB.509505.20	0.354092	1.27818	0.0625332	hypothetical protein, conserved
TcCLB.511857.50	0.354047	1.27814	0.0903137	actin-like protein, putative
TcCLB.510329.160	0.353965	1.27807	0.0196747	hypothetical protein, conserved
TcCLB.511815.180	0.353899	1.27801	0.011523	cytoskeleton associated protein, putative
TcCLB.509041.10	0.353705	1.27784	0.0877174	tyrosine aminotransferase, putative
TcCLB.507065.70	0.35324	1.27743	0.0964342	mucin TcMUCII, putative
TcCLB.506479.60	0.353179	1.27737	0.058297	kinesin heavy chain, putative
TcCLB.509901.100	0.353103	1.27731	0.00157137	hypothetical protein, conserved
TcCLB.509601.10	0.352955	1.27717	0.0625824	neutral sphingomyelinase activation associated factor-like protein
TcCLB.506321.210	0.352795	1.27703	NA	mucin TcMUCII, putative
TcCLB.510359.150	0.351874	1.27622	0.0114092	ATP-dependent helicase, putative
TcCLB.504105.180	0.351854	1.2762	0.0457706	hypothetical protein, conserved
TcCLB.508015.10	0.351767	1.27612	0.18187	hypothetical protein
TcCLB.510795.10	0.350817	1.27528	0.00018282	tyrosine aminotransferase
TcCLB.509693.209	0.35065	1.27513	0.0460606	mismatch repair protein, putative
TcCLB.511843.70	0.350421	1.27493	0.168336	trans-sialidase, Group V, putative
TcCLB.510187.439	0.35041	1.27492	0.00227037	hypothetical protein
TcCLB.509331.150	0.350179	1.27472	0.184353	permease-like protein, putative
TcCLB.510699.50	0.349926	1.2745	0.0583927	mucin TcMUCII, putative
TcCLB.509999.20	0.349761	1.27435	0.0109769	hypothetical protein, conserved
TcCLB.509287.140	0.34964	1.27424	0.0529038	dispersed gene family protein 1 (DGF-1), putative
TcCLB.507031.140	0.349638	1.27424	0.0357065	hypothetical protein, conserved (pseudogene)
TcCLB.508689.30	0.349436	1.27406	0.0120416	hypothetical protein, conserved
TcCLB.511769.20	0.349351	1.27399	0.15602	dispersed gene family protein 1 (DGF-1), putative
TcCLB.507919.10	0.349102	1.27377	0.0322392	surface protease GP63, putative
TcCLB.510187.30	0.348811	1.27351	0.000130291	tyrosine aminotransferase
TcCLB.506469.110	0.348322	1.27308	0.14352	hypothetical protein
TcCLB.506559.4	0.348015	1.27281	0.184985	hypothetical protein, conserved (fragment)
TcCLB.506559.454	0.347978	1.27278	0.0674333	GTP-binding protein, putative
TcCLB.509941.70	0.347835	1.27265	0.0788817	dispersed gene family protein 1 (DGF-1, pseudogene), putative
TcCLB.510329.90	0.347593	1.27244	0.00488055	C-8 sterol isomerase, putative
TcCLB.510571.10	0.347415	1.27228	0.182561	hypothetical protein, conserved
TcCLB.509295.10	0.34697	1.27189	0.0892254	dispersed gene family protein 1 (DGF-1), putative
TcCLB.503693.29	0.346605	1.27156	0.0311261	hypothetical protein
TcCLB.511629.40	0.346603	1.27156	0.265528	hypothetical protein, conserved
TcCLB.510129.20	0.346489	1.27146	0.00443277	Surface membrane protein
TcCLB.511725.240	0.346216	1.27122	0.0067711	hypothetical protein, conserved
TcCLB.503679.30	0.346196	1.2712	0.104421	hypothetical protein, conserved
TcCLB.507687.20	0.346118	1.27114	0.222668	dispersed gene family protein 1 (DGF-1), putative
TcCLB.506445.40	0.346069	1.27109	0.0821637	ubiquitin hydrolase (pseudogene), putative
TcCLB.510679.100	0.346048	1.27107	0.0012551	lipase, putative
TcCLB.507167.80	0.345988	1.27102	0.00181468	trans-sialidase, Group II, putative
TcCLB.510819.119	0.345857	1.27091	0.10817	zinc finger (CCCH type) protein, putative
TcCLB.505997.174	0.345502	1.27059	0.0778004	dispersed gene family protein 1 (DGF-1), putative
TcCLB.511389.140	0.345425	1.27052	0.160331	hypothetical protein, conserved
TcCLB.507619.10	0.345387	1.27049	0.147737	hypothetical protein, conserved (fragment)
TcCLB.511907.240	0.345165	1.2703	0.0433201	protein kinase, putative
TcCLB.508521.90	0.345003	1.27015	0.301368	trans-sialidase (pseudogene), putative
TcCLB.508119.30	0.34366	1.26897	NA	mucin TcMUCII, putative
TcCLB.507681.259	0.343619	1.26894	0.141678	Flagellar Member 1 (fragment)
TcCLB.511859.120	0.343131	1.26851	NA	mucin-like glycoprotein, putative
TcCLB.510187.390	0.343116	1.26849	0.0127319	Protein kinase domain, putative
TcCLB.508919.130	0.343018	1.26841	0.0065503	hypothetical protein, conserved
TcCLB.508895.70	0.342973	1.26837	0.101874	membrane protein, putative
TcCLB.511161.10	0.342639	1.26807	0.321378	hypothetical protein, conserved (pseudogene)
TcCLB.503439.14	0.342502	1.26795	0.145787	dispersed gene family protein 1 (DGF-1, pseudogene), putative
TcCLB.503415.40	0.341938	1.26746	0.325227	hypothetical protein
TcCLB.508303.10	0.341349	1.26694	0.143428	alanine racemase 2, putative
TcCLB.508693.190	0.34072	1.26639	0.316649	hypothetical protein, conserved
TcCLB.507705.10	0.340691	1.26636	NA	hypothetical protein, conserved
TcCLB.506627.10	0.340682	1.26636	0.045533	AMP deaminase 2, putative
TcCLB.509085.60	0.340224	1.26595	0.131548	dispersed gene family protein 1 (DGF-1), putative
TcCLB.507209.30	0.340153	1.26589	0.0207383	hypothetical protein, conserved
TcCLB.506335.50	0.339845	1.26562	0.0712669	Mucin-associated surface protein (MASP), subgroup S091
TcCLB.511861.20	0.3393	1.26514	0.0357112	trans-sialidase, Group V, putative
TcCLB.509569.40	0.339161	1.26502	0.0141972	hypothetical protein, conserved
TcCLB.511839.20	0.338882	1.26478	0.0625332	Mucin-associated surface protein (MASP), subgroup S084
TcCLB.506957.80	0.338825	1.26473	0.00956021	hypothetical protein, conserved
TcCLB.510575.20	0.338809	1.26471	0.153536	hypothetical protein, conserved
TcCLB.507087.80	0.338746	1.26466	0.0273984	5'-3' exoribonuclease B, putative
TcCLB.507167.190	0.338694	1.26461	NA	trans-sialidase (pseudogene), putative
TcCLB.503539.20	0.338625	1.26455	0.197912	Putative intraflagellar transport protein A1
TcCLB.511017.25	0.338518	1.26446	0.316328	hypothetical protein
TcCLB.506793.50	0.338407	1.26436	0.107911	hypothetical protein, conserved
TcCLB.511861.50	0.337808	1.26384	0.0185054	trans-sialidase, Group VIII, putative
TcCLB.511257.90	0.337701	1.26374	0.236557	Mucin-associated surface protein (MASP), subgroup S043
TcCLB.511807.140	0.337384	1.26346	0.0243938	hypothetical protein, conserved
TcCLB.510439.61	0.337136	1.26325	0.000158763	heat shock 70 kDa protein, putative (fragment)
TcCLB.511899.50	0.337106	1.26322	0.0540491	Trypanosome basal body component protein (fragment)
TcCLB.508891.30	0.336805	1.26296	0.0152024	hypothetical protein, conserved
TcCLB.510155.94	0.336702	1.26287	0.0830768	hypothetical protein, conserved
TcCLB.504109.174	0.336169	1.2624	0.192237	hypothetical protein, conserved
TcCLB.509029.60	0.335814	1.26209	0.0414823	Flagellum attachment zone protein 3
TcCLB.510303.140	0.335748	1.26203	0.286617	surface protease GP63, putative
TcCLB.511283.40	0.33573	1.26202	0.104442	syntaxin 5, putative
TcCLB.506427.10	0.335282	1.26162	0.178428	trans-sialidase, Group VIII, putative
TcCLB.506469.80	0.33528	1.26162	0.132489	protein kinase, putative
TcCLB.510421.29	0.335163	1.26152	0.251044	CAAX prenyl protease 2, putative
TcCLB.508479.220	0.335122	1.26148	0.0197087	hypothetical protein, conserved
TcCLB.506425.30	0.335105	1.26147	0.0890953	hypothetical protein, conserved
TcCLB.511239.10	0.335034	1.26141	0.046015	hypothetical protein, conserved
TcCLB.508153.1000	0.334942	1.26133	0.0818834	hypothetical protein, conserved
TcCLB.510663.40	0.334616	1.26104	0.0512656	hypothetical protein, conserved
TcCLB.509401.20	0.334587	1.26102	0.00049273	cysteine peptidase (pseudogene), putative
TcCLB.509413.10	0.334289	1.26076	0.0977552	hypothetical protein, conserved
TcCLB.507895.69	0.334288	1.26076	0.0949419	hypothetical protein, conserved
TcCLB.508175.133	0.334039	1.26054	0.0280825	hypothetical protein, conserved (pseudogene)
TcCLB.508545.30	0.334021	1.26052	0.340166	hypothetical protein, conserved
TcCLB.506009.109	0.334019	1.26052	0.291801	hypothetical protein, conserved
TcCLB.504105.87	0.334005	1.26051	0.169738	hypothetical protein, conserved
TcCLB.508919.110	0.33392	1.26043	NA	hypothetical protein, conserved
TcCLB.510079.40	0.333744	1.26028	0.0163952	dispersed gene family protein 1 (DGF-1, pseudogene), putative
TcCLB.511385.60	0.333729	1.26027	0.172922	hypothetical protein
TcCLB.510579.50	0.333723	1.26026	0.0592781	hypothetical protein, conserved
TcCLB.507793.20	0.333694	1.26024	0.00415758	cysteine synthase, putative
TcCLB.508111.30	0.333463	1.26003	5.31457e-06	glutamate dehydrogenase, putative
TcCLB.506883.90	0.333419	1.26	0.0998121	hypothetical protein, conserved
TcCLB.506975.90	0.3331	1.25972	0.045956	trans-sialidase, Group VIII, putative
TcCLB.511277.60	0.333058	1.25968	4.2005e-05	alcohol dehydrogenase, putative
TcCLB.511511.40	0.333009	1.25964	0.262409	hypothetical protein, conserved
TcCLB.511277.240	0.332916	1.25956	0.338609	vacuolar ATP synthase subunit c, putative
TcCLB.503773.40	0.332686	1.25936	0.0998783	hypothetical protein, conserved
TcCLB.509561.20	0.332649	1.25932	0.0944988	Flagellum adhesion protein 1
TcCLB.510033.22	0.332371	1.25908	0.305027	surface protease GP63 (pseudogene), putative
TcCLB.508689.10	0.332112	1.25885	0.0633005	hypothetical protein, conserved
TcCLB.509525.20	0.331632	1.25844	0.064202	trans-sialidase (pseudogene), putative
TcCLB.506175.50	0.331081	1.25796	0.0376839	hypothetical protein, conserved
TcCLB.472777.9	0.330833	1.25774	0.310954	hypothetical protein, conserved
TcCLB.508735.10	0.330393	1.25736	0.217872	trans-sialidase (pseudogene), putative
TcCLB.505171.100	0.330271	1.25725	0.204266	hypothetical protein, conserved
TcCLB.510359.680	0.330257	1.25724	NA	Mucin-associated surface protein (MASP) (pseudogene)
TcCLB.509573.10	0.330256	1.25724	0.158231	small GTP-binding protein Rab7, putative
TcCLB.509225.21	0.330064	1.25707	0.0309466	hypothetical protein
TcCLB.508573.120	0.329798	1.25684	0.317041	dispersed gene family protein 1 (DGF-1), putative
TcCLB.506347.5	0.329359	1.25646	0.283119	trans-sialidase, putative (fragment)
TcCLB.510187.500	0.329196	1.25631	0.334584	serine/threonine protein phosphatase 2B catalytic subunit A2, putative
TcCLB.508275.9	0.329026	1.25617	0.152631	dynein heavy chain, putative (fragment)
TcCLB.505193.40	0.329004	1.25615	0.125112	SUMO1/Ulp2, putative
TcCLB.424123.30	0.328561	1.25576	0.317041	hypothetical protein, conserved
TcCLB.506315.80	0.328035	1.2553	0.021819	hypothetical protein, conserved
TcCLB.506957.140	0.327637	1.25496	0.0694446	phosphatidylinositol-4-phosphate 5-kinase-like, putative
TcCLB.508963.30	0.327436	1.25478	0.168758	trans-sialidase, Group VIII, putative
TcCLB.509695.50	0.326737	1.25417	0.0956082	katanin, putative
TcCLB.507681.40	0.326626	1.25408	0.0483731	hypothetical protein
TcCLB.508533.10	0.326579	1.25404	0.00560757	hypothetical protein, conserved
TcCLB.503987.50	0.326573	1.25403	0.223938	hypothetical protein, conserved
TcCLB.510819.10	0.326421	1.2539	0.0849497	Eukaryotic translation initiation factor 4 gamma 1
TcCLB.511827.20	0.326159	1.25367	0.0145789	hypothetical protein, conserved
TcCLB.508297.7	0.326143	1.25366	0.0212784	trans-sialidase, putative (fragment)
TcCLB.509577.9	0.325743	1.25331	0.270882	hypothetical protein, conserved (fragment)
TcCLB.507503.20	0.325706	1.25328	0.160413	glycine dehydrogenase [decarboxylating] (pseudogene), putative
TcCLB.508273.100	0.325627	1.25321	0.334508	mucin TcMUCI, putative
TcCLB.511757.70	0.325532	1.25313	0.0278436	trans-sialidase, Group II, putative
TcCLB.509495.30	0.325477	1.25308	0.16449	trans-sialidase, Group I, putative
TcCLB.507771.50	0.325158	1.2528	0.056906	glycerolphosphate mutase, putative
TcCLB.504069.100	0.324931	1.2526	0.299412	RNA polymerase II, putative
TcCLB.506851.10	0.32491	1.25259	0.0222822	NIMA-related kinase, putative
TcCLB.507491.140	0.324799	1.25249	0.14106	hypothetical protein, conserved
TcCLB.511823.30	0.32429	1.25205	0.0851518	hypothetical protein, conserved
TcCLB.508001.50	0.324076	1.25186	0.0694446	trans-sialidase (pseudogene), putative
TcCLB.510479.30	0.323945	1.25175	0.0901193	hypothetical protein
TcCLB.506559.250	0.323844	1.25166	0.0942017	hypothetical protein, conserved
TcCLB.506871.120	0.323412	1.25129	0.0674144	hypothetical protein, conserved
TcCLB.508629.10	0.323344	1.25123	0.241302	dispersed gene family protein 1 (DGF-1), putative
TcCLB.507519.120	0.323162	1.25107	0.103127	hypothetical protein, conserved
TcCLB.506871.70	0.323138	1.25105	0.117944	hypothetical protein, conserved
TcCLB.511649.160	0.323002	1.25093	0.0668909	hypothetical protein, conserved
TcCLB.504155.20	0.322919	1.25086	0.114659	trans-sialidase, Group V, putative
TcCLB.506957.120	0.322896	1.25084	0.0215933	hypothetical protein, conserved
TcCLB.510399.39	0.322786	1.25074	0.326587	dispersed gene family protein 1 (DGF-1), putative
TcCLB.510889.251	0.322682	1.25065	0.163108	Present in the outer mitochondrial membrane proteome 18
TcCLB.507623.80	0.322608	1.25059	0.215501	hypothetical protein, conserved
TcCLB.503925.119	0.322386	1.2504	0.306153	protein kinase, putative
TcCLB.507615.90	0.322302	1.25032	0.0110468	hypothetical protein, conserved
TcCLB.509911.30	0.32216	1.2502	0.187082	hypothetical protein
TcCLB.504173.60	0.321895	1.24997	0.142552	hypothetical protein, conserved
TcCLB.504157.50	0.321864	1.24994	0.0796305	DnaJ chaperone protein, putative
TcCLB.507081.80	0.321853	1.24994	0.0775466	hypothetical protein, conserved
TcCLB.511459.20	0.321464	1.2496	0.154395	hypothetical protein, conserved
TcCLB.506123.30	0.321183	1.24935	0.0478737	protein kinase, putative
TcCLB.508737.10	0.321008	1.2492	0.196278	Trypomastigote, Alanine, Serine and Valine rich protein (TASV), subfamily C
TcCLB.510357.40	0.320978	1.24918	0.153975	hypothetical protein, conserved
TcCLB.506853.30	0.320654	1.2489	0.0395473	arginine N-methyltransferase, type II, putative
TcCLB.508503.30	0.320648	1.24889	0.232208	hypothetical protein
TcCLB.509613.10	0.320574	1.24883	NA	hypothetical protein, conserved
TcCLB.508889.19	0.320572	1.24883	0.340488	hypothetical protein
TcCLB.510187.360	0.320251	1.24855	0.0204305	hypothetical protein, conserved
TcCLB.511817.270	0.320237	1.24854	0.0720776	hypothetical protein, conserved
TcCLB.503655.30	0.320106	1.24842	0.341307	mucin-like glycoprotein, putative
TcCLB.507297.10	0.320074	1.24839	0.000668056	cruzipain precursor, putative
TcCLB.506139.80	0.320073	1.24839	NA	mucin TcMUCII, putative
TcCLB.511521.24	0.319935	1.24827	0.356247	hypothetical protein, conserved
TcCLB.508909.10	0.319837	1.24819	0.154395	OSM3-like kinesin, putative
TcCLB.510357.60	0.319096	1.24755	0.193243	hypothetical protein, conserved
TcCLB.511277.130	0.319073	1.24753	0.0400181	hypothetical protein, conserved
TcCLB.506871.180	0.319029	1.24749	0.0309466	G5-interacting protein, putative
TcCLB.510121.20	0.318951	1.24742	0.000451942	hexokinase, putative
TcCLB.506415.30	0.31883	1.24732	0.105045	hypothetical protein, conserved
TcCLB.503943.20	0.318814	1.2473	0.0941158	hypothetical protein, conserved
TcCLB.509617.40	0.318761	1.24726	0.35881	hypothetical protein, conserved
TcCLB.508577.50	0.318355	1.24691	0.282882	hypothetical protein
TcCLB.509259.40	0.318287	1.24685	0.328683	surface protease GP63, putative
TcCLB.506583.50	0.318125	1.24671	0.366516	hypothetical protein, conserved
TcCLB.506791.20	0.317927	1.24654	0.09327	hypothetical protein, conserved
TcCLB.509259.45	0.317901	1.24652	NA	hypothetical protein
TcCLB.510735.100	0.317768	1.2464	0.301586	hypothetical protein, conserved
TcCLB.509109.14	0.317621	1.24627	0.235276	hypothetical protein, conserved (fragment)
TcCLB.508433.145	0.317418	1.2461	0.318398	mucin TcMUCII (pseudogene), putative
TcCLB.503847.20	0.317399	1.24608	0.1886	myosin heavy chain, putative
TcCLB.504797.10	0.317397	1.24608	0.369436	acidocalcisomal exopolyphosphatase, putative
TcCLB.511301.90	0.317289	1.24599	0.105242	protein kinase, putative
TcCLB.508015.20	0.317049	1.24578	0.355706	hypothetical protein
TcCLB.503617.10	0.316874	1.24563	0.0163942	protein kinase, putative
TcCLB.508851.160	0.31683	1.24559	0.0740582	hypothetical protein, conserved
TcCLB.446067.9	0.316765	1.24553	0.342318	hypothetical protein, conserved (fragment)
TcCLB.508979.90	0.316699	1.24548	0.14239	hypothetical protein
TcCLB.503987.70	0.316665	1.24545	0.224801	ribosome biogenesis protein TSR3, putative
TcCLB.510733.60	0.316223	1.24507	0.0858635	DNA polymerase epsilon catalytic subunit, putative
TcCLB.507849.40	0.315725	1.24464	0.0422396	hypothetical protein, conserved
TcCLB.511481.10	0.315692	1.24461	0.345113	hypothetical protein, conserved
TcCLB.506321.50	0.31569	1.24461	0.317753	Mucin-associated surface protein (MASP), subgroup S025
TcCLB.508267.30	0.315285	1.24426	0.204904	hypothetical protein, conserved
TcCLB.508737.80	0.314856	1.24389	0.0626849	mannosyltransferase-like protein, putative
TcCLB.509875.20	0.314818	1.24385	0.169179	dispersed gene family protein 1 (DGF-1), putative
TcCLB.506145.20	0.314794	1.24383	0.129385	hypothetical protein, conserved
TcCLB.509937.160	0.314712	1.24376	0.0268466	hypothetical protein, conserved
TcCLB.511321.30	0.314624	1.24369	0.355909	hypothetical protein, conserved
TcCLB.507019.45	0.314573	1.24364	0.164379	hypothetical protein
TcCLB.508621.10	0.314241	1.24336	0.260271	protein kinase, putative
TcCLB.506279.250	0.313833	1.24301	0.236557	trans-sialidase (pseudogene), putative
TcCLB.510735.90	0.313513	1.24273	0.0689226	Flagellum attachment zone protein 4
TcCLB.507637.170	0.31346	1.24268	0.375194	surface protease GP63, putative
TcCLB.507633.80	0.313408	1.24264	0.12015	trans-sialidase, Group V, putative
TcCLB.504689.60	0.313128	1.2424	0.16449	dispersed gene family protein 1 (DGF-1), putative
TcCLB.511317.79	0.313043	1.24233	0.369436	OSM3-like kinesin, putative
TcCLB.511245.150	0.312992	1.24228	0.323339	fatty acid elongase, putative
TcCLB.508461.4	0.312921	1.24222	0.151639	Spindle assembly abnormal protein 6 homolog (fragment)
TcCLB.503919.20	0.31277	1.24209	0.33816	hypothetical protein, conserved
TcCLB.508231.130	0.312504	1.24186	0.288436	Cell division control protein 48, putative
TcCLB.509793.50	0.312121	1.24153	0.0219027	hypothetical protein, conserved
TcCLB.508257.210	0.311842	1.24129	0.0956504	hypothetical protein, conserved
TcCLB.509771.10	0.31175	1.24121	0.221858	trans-sialidase, Group II, putative
TcCLB.508693.20	0.311478	1.24098	0.047101	DNA topoisomerase IB, large subunit
TcCLB.510237.80	0.311229	1.24076	0.14239	trans-sialidase, Group V, putative
TcCLB.508195.10	0.310997	1.24056	0.0242556	UDP-Gal or UDP-GlcNAc-dependent glycosyltransferase, putative
TcCLB.511499.50	0.310982	1.24055	0.0937443	ubiquitin hydrolase, putative
TcCLB.503973.190	0.310912	1.24049	NA	Mucin-associated surface protein (MASP), subgroup S080
TcCLB.510867.19	0.310838	1.24043	0.368819	trans-sialidase (pseudogene), putative
TcCLB.506559.240	0.310696	1.24031	0.343033	hypothetical protein, conserved
TcCLB.510219.10	0.310662	1.24028	0.190684	hypothetical protein, conserved
TcCLB.508501.310	0.310565	1.24019	0.217553	hypothetical protein, conserved
TcCLB.504081.321	0.310541	1.24017	0.298009	hypothetical protein, conserved (pseudogene)
TcCLB.509721.79	0.310398	1.24005	0.0765352	hypothetical protein, conserved (fragment)
TcCLB.508153.570	0.310291	1.23996	0.16197	protein kinase, putative
TcCLB.507539.40	0.310277	1.23995	0.262806	cell cycle sequence binding phosphoprotein (RBP33), putative
TcCLB.507381.20	0.310252	1.23992	0.186822	trans-sialidase (pseudogene), putative
TcCLB.504001.6	0.310181	1.23986	0.385112	protein kinase, putative
TcCLB.511153.70	0.309822	1.23955	0.0634462	hypothetical protein, conserved
TcCLB.505071.30	0.309779	1.23952	0.0796813	serine/threonine protein kinase, putative
TcCLB.507773.60	0.309567	1.23934	0.0253125	phosphoribosylpyrophosphate synthetase, putative
TcCLB.511755.24	0.309543	1.23932	0.058297	hypothetical protein, conserved (pseudogene)
TcCLB.510901.20	0.309444	1.23923	0.182916	hypothetical protein
TcCLB.511319.20	0.309283	1.23909	0.0653898	hypothetical protein, conserved
TcCLB.511563.20	0.308679	1.23857	0.332242	trans-sialidase (pseudogene), putative
TcCLB.503861.80	0.308577	1.23849	0.124577	dispersed gene family protein 1 (DGF-1), putative
TcCLB.510329.380	0.308522	1.23844	0.142593	hypothetical protein, conserved
TcCLB.510329.340	0.30848	1.2384	0.0970527	hypothetical protein, conserved
TcCLB.507251.30	0.308362	1.2383	0.00280549	hypothetical protein, conserved
TcCLB.511649.140	0.30823	1.23819	0.189798	hypothetical protein, conserved
TcCLB.511657.70	0.308144	1.23811	0.0796813	hypothetical protein, conserved
TcCLB.511267.40	0.308144	1.23811	NA	hypothetical protein, conserved
TcCLB.509029.70	0.308125	1.2381	0.0484194	leucine-rich repeat protein, putative
TcCLB.510687.90	0.307831	1.23784	0.0886565	hypothetical protein, conserved
TcCLB.506993.160	0.307827	1.23784	0.0661978	trans-sialidase (pseudogene), putative
TcCLB.508077.9	0.307516	1.23758	0.204458	conserved protein (fragment)
TcCLB.503845.60	0.307433	1.2375	0.154387	trans-sialidase (pseudogene), putative
TcCLB.508051.20	0.307321	1.23741	0.0420612	hypothetical protein, conserved
TcCLB.511255.516	0.307295	1.23739	0.263957	syntaxin binding protein (pseudogene), putative
TcCLB.503573.9	0.30696	1.2371	0.149056	ATP-binding cassette transporter ABCA1, putative
TcCLB.509459.40	0.306644	1.23683	0.39344	hypothetical protein, conserved
TcCLB.510577.10	0.306373	1.23659	NA	hypothetical protein, conserved
TcCLB.503395.59	0.306095	1.23636	NA	hypothetical protein, conserved (fragment)
TcCLB.510945.50	0.306043	1.23631	0.103667	hypothetical protein, conserved
TcCLB.510187.470	0.305682	1.236	0.339988	hypothetical protein
TcCLB.508257.220	0.305324	1.2357	0.0143637	expression site-associated gene (ESAG-like) protein, putative
TcCLB.509027.20	0.305107	1.23551	0.329838	ankyrin repeat protein, putative
TcCLB.506975.80	0.305068	1.23548	0.170072	trans-sialidase, Group I, putative
TcCLB.510889.190	0.305005	1.23542	0.259332	hypothetical protein, conserved
TcCLB.511517.44	0.305001	1.23542	0.129582	chaperone DNAJ protein, putative
TcCLB.507991.50	0.304837	1.23528	0.0266141	kinesin, putative
TcCLB.507491.39	0.304702	1.23516	0.0688357	hypothetical protein, conserved
TcCLB.508543.60	0.304667	1.23513	0.0909531	hypothetical protein, conserved
TcCLB.508595.40	0.304561	1.23504	0.000396301	cysteine peptidase, putative
TcCLB.509715.150	0.304401	1.23491	0.192535	hypothetical protein
TcCLB.509571.40	0.304203	1.23474	0.14169	hypothetical protein, conserved
TcCLB.511245.170	0.304011	1.23457	0.0418828	hypothetical protein, conserved
TcCLB.511259.70	0.303905	1.23448	NA	Mucin-associated surface protein (MASP) (pseudogene)
TcCLB.508153.1030	0.303715	1.23432	0.0503512	hypothetical protein, conserved
TcCLB.511851.30	0.303396	1.23405	0.3331	trans-sialidase (pseudogene), putative
TcCLB.508199.30	0.303387	1.23404	0.333695	hypothetical protein, conserved
TcCLB.507911.30	0.303273	1.23394	0.122521	dispersed gene family protein 1 (DGF-1), putative
TcCLB.508479.224	0.303267	1.23394	0.125772	hypothetical protein, conserved
TcCLB.509023.150	0.302893	1.23362	0.120999	integral membrane transport protein, putative
TcCLB.508355.80	0.301718	1.23261	0.395905	trans-sialidase, Group VIII, putative
TcCLB.508965.30	0.301703	1.2326	0.132927	hypothetical protein
TcCLB.504161.10	0.3016	1.23251	0.35222	hypothetical protein
TcCLB.508961.40	0.301552	1.23247	0.0999718	hypothetical protein, conserved
TcCLB.507779.20	0.301546	1.23246	0.385225	trans-sialidase (pseudogene), putative
TcCLB.506419.30	0.301489	1.23242	0.126948	hypothetical protein, conserved
TcCLB.503593.40	0.301465	1.2324	0.0782465	hypothetical protein
TcCLB.506577.20	0.301437	1.23237	0.0657768	hypothetical protein
TcCLB.510203.34	0.30132	1.23227	NA	Mucin-associated surface protein (MASP) (pseudogene)
TcCLB.511727.230	0.300877	1.23189	0.0601945	Repressor of differentiation kinase 1, putative
TcCLB.510655.100	0.300461	1.23154	0.065202	hypothetical protein
TcCLB.510575.239	0.30044	1.23152	NA	hypothetical protein, conserved
TcCLB.506855.310	0.300356	1.23145	0.0449018	hypothetical protein, conserved
TcCLB.506999.140	0.300266	1.23137	0.0420612	hypothetical protein, conserved
TcCLB.510359.580	0.300032	1.23117	0.401665	mucin TcMUCII, putative
TcCLB.508495.80	0.299976	1.23112	NA	Mucin-associated surface protein (MASP) (pseudogene)
TcCLB.510385.10	0.299966	1.23112	0.217872	dispersed gene family protein 1 (DGF-1), putative
TcCLB.511487.30	0.299929	1.23108	0.297375	dispersed gene family protein 1 (DGF-1), putative
TcCLB.439125.10	0.299837	1.23101	0.355909	Peptide chain release factor 1, mitochondrial, putative
TcCLB.509115.60	0.299503	1.23072	0.397768	mucin-like glycoprotein, putative
TcCLB.510823.30	0.298363	1.22975	0.188262	Isoprenylcysteine alpha-carbonyl methylesterase, putative
TcCLB.511757.10	0.298234	1.22964	0.0463814	hypothetical protein, conserved
TcCLB.508735.100	0.297882	1.22934	0.15641	hypothetical protein, conserved
TcCLB.504069.120	0.297241	1.22879	0.257825	amino acid permease 24, putative
TcCLB.510661.240	0.297092	1.22867	0.0826032	hypothetical protein, conserved
TcCLB.504253.40	0.296777	1.2284	0.204335	hypothetical protein, conserved
TcCLB.507069.139	0.296751	1.22838	NA	mucin TcMUCII (pseudogene), putative
TcCLB.509755.40	0.296617	1.22826	NA	Mucin-associated surface protein (MASP), subgroup S036
TcCLB.511233.59	0.296258	1.22795	0.40407	hypothetical protein, conserved
TcCLB.506247.190	0.296248	1.22795	NA	nuclear lim interactor-interacting factor, putative
TcCLB.506331.120	0.296203	1.22791	0.205927	trans-sialidase (pseudogene), putative
TcCLB.509607.70	0.296046	1.22778	NA	serine/threonine protein kinase, putative
TcCLB.506577.170	0.29597	1.22771	0.360842	hypothetical protein, conserved
[truncated: 9,810 more rows]

## Sheet: Pt-dppf-mpo Upregulated genes
Gene ID	Fold Change	p adj (FDR)	Product Description
[truncated: 82 more rows]

[truncated: 1 more sheets: Pt-dppf-mpo Downregulated genes]
