# Supplementary material for: Comparative high-throughput analysis of the Trypanosoma cruzi response to organometallic compounds
Source: Royal Society of Chemistry journal article supplement (doi:10.1039/d0mt00030b), 2020-03-24
Supplement: d0mt00030b4.xlsx [file d0mt00030b4.xlsx]

## Sheet: Pd-dppf-mpo
Pd-dppf-mpo up-regulated genes
Term	ID	Name	Bgd count	Result count	Result gene list	Pct of bgd	Fold enrichment	Odds ratio	Bonferroni
BP	GO:0006464	cellular protein modification process	406	93	TcCLB.440099.28,TcCLB.463451.10,TcCLB.467287.10,TcCLB.467795.9,TcCLB.503583.80,TcCLB.503617.10,TcCLB.503635.10,TcCLB.503657.70,TcCLB.505071.140,TcCLB.505193.60,TcCLB.506123.30,TcCLB.506201.70,TcCLB.506201.80,TcCLB.506297.250,TcCLB.506303.120,TcCLB.506327.80,TcCLB.506327.90,TcCLB.506469.30,TcCLB.506477.60,TcCLB.506559.190,TcCLB.506577.130,TcCLB.506679.80,TcCLB.506851.10,TcCLB.506977.10,TcCLB.50699…	22.9	1.88	2.31	9.83984e-09
MF	GO:0016301	kinase activity	301	83	TcCLB.440099.28,TcCLB.463451.10,TcCLB.503617.10,TcCLB.503635.10,TcCLB.505071.140,TcCLB.505193.60,TcCLB.506123.30,TcCLB.506303.120,TcCLB.506327.80,TcCLB.506327.90,TcCLB.506469.30,TcCLB.506477.60,TcCLB.506559.190,TcCLB.506679.80,TcCLB.506851.10,TcCLB.506957.140,TcCLB.506985.60,TcCLB.506999.180,TcCLB.507063.130,TcCLB.507317.60,TcCLB.507491.90,TcCLB.507515.120,TcCLB.507743.9,TcCLB.507897.30,TcCLB.508…	27.6	2.26	2.97	2.77133e-12
MF	GO:0043167	ion binding	1133	177	TcCLB.440099.28,TcCLB.449759.9,TcCLB.463451.10,TcCLB.472833.10,TcCLB.503573.9,TcCLB.503617.10,TcCLB.503635.10,TcCLB.503917.50,TcCLB.503999.100,TcCLB.503999.20,TcCLB.504013.70,TcCLB.504085.10,TcCLB.504161.40,TcCLB.504173.60,TcCLB.505037.50,TcCLB.505071.140,TcCLB.505193.60,TcCLB.506009.10,TcCLB.506009.100,TcCLB.506123.30,TcCLB.506275.60,TcCLB.506303.120,TcCLB.506327.80,TcCLB.506327.90,TcCLB.506337.…	15.6	1.28	1.44	0.0025411
Pd-dppf-mpo down-regulated genes
Term	ID	Name	Bgd count	Result count	Result gene list	Pct of bgd	Fold enrichment	Odds ratio	Bonferroni
BP	GO:0044281	small molecule metabolic process	330	113	TcCLB.426435.9,TcCLB.474937.9,TcCLB.503597.10,TcCLB.503625.10,TcCLB.503815.10,TcCLB.503929.10,TcCLB.503935.20,TcCLB.504069.80,TcCLB.504079.6,TcCLB.504105.140,TcCLB.505183.30,TcCLB.505999.90,TcCLB.506247.210,TcCLB.506247.220,TcCLB.506247.330,TcCLB.506295.100,TcCLB.506297.190,TcCLB.506337.160,TcCLB.506435.270,TcCLB.506559.350,TcCLB.506619.10,TcCLB.506621.60,TcCLB.506789.280,TcCLB.506831.40,TcCLB.50…	34.2	2.17	3.02	4.88024e-16
BP	GO:0006091	generation of precursor metabolites and energy	62	25	TcCLB.503935.20,TcCLB.504105.140,TcCLB.505999.90,TcCLB.506247.330,TcCLB.506295.100,TcCLB.506337.160,TcCLB.506835.70,TcCLB.506839.70,TcCLB.506999.90,TcCLB.507681.20,TcCLB.507767.10,TcCLB.508153.340,TcCLB.508355.40,TcCLB.508479.340,TcCLB.509065.60,TcCLB.509065.70,TcCLB.509717.80,TcCLB.510187.60,TcCLB.510301.10,TcCLB.510301.20,TcCLB.510329.270,TcCLB.510437.40,TcCLB.511277.70,TcCLB.511323.50,TcCLB.51…	40.3	2.56	3.68	0.000112943
BP	GO:0055085	transmembrane transport	129	40	TcCLB.450161.10,TcCLB.503929.10,TcCLB.504069.70,TcCLB.504069.80,TcCLB.504131.180,TcCLB.504797.140,TcCLB.506247.210,TcCLB.506443.40,TcCLB.506821.170,TcCLB.506821.180,TcCLB.506833.70,TcCLB.506977.70,TcCLB.507517.60,TcCLB.507623.129,TcCLB.508173.264,TcCLB.508257.140,TcCLB.508397.10,TcCLB.508441.80,TcCLB.508821.50,TcCLB.508851.59,TcCLB.509063.30,TcCLB.509337.19,TcCLB.509437.60,TcCLB.509437.70,TcCLB.5…	31	1.97	2.46	0.000387778
BP	GO:0042254	ribosome biogenesis	72	26	TcCLB.401469.20,TcCLB.503823.130,TcCLB.503869.50,TcCLB.503923.30,TcCLB.503929.20,TcCLB.504069.90,TcCLB.504085.20,TcCLB.506123.50,TcCLB.506241.200,TcCLB.507019.30,TcCLB.507583.20,TcCLB.508269.60,TcCLB.508445.99,TcCLB.508649.10,TcCLB.509161.20,TcCLB.509671.120,TcCLB.509715.40,TcCLB.509715.9,TcCLB.510687.120,TcCLB.510899.59,TcCLB.510947.50,TcCLB.511237.100,TcCLB.511287.150,TcCLB.511287.90,TcCLB.5118…	36.1	2.29	3.07	0.000770983
BP	GO:0006520	cellular amino acid metabolic process	102	33	TcCLB.503597.10,TcCLB.503625.10,TcCLB.504079.6,TcCLB.506247.220,TcCLB.506559.350,TcCLB.506789.280,TcCLB.506905.50,TcCLB.507019.40,TcCLB.508173.40,TcCLB.508175.360,TcCLB.508175.370,TcCLB.508177.110,TcCLB.508177.120,TcCLB.508457.30,TcCLB.508741.140,TcCLB.508857.160,TcCLB.508971.30,TcCLB.508971.40,TcCLB.509037.50,TcCLB.509207.90,TcCLB.509679.9,TcCLB.509695.10,TcCLB.509937.150,TcCLB.510187.70,TcCLB.5…	32.4	2.05	2.61	0.000885322
BP	GO:0006790	sulfur compound metabolic process	35	16	TcCLB.503465.30,TcCLB.506679.60,TcCLB.506905.50,TcCLB.507913.20,TcCLB.508173.40,TcCLB.508175.360,TcCLB.508177.110,TcCLB.508177.120,TcCLB.508865.10,TcCLB.509319.90,TcCLB.509641.50,TcCLB.509749.10,TcCLB.510445.50,TcCLB.511273.59,TcCLB.511281.40,TcCLB.511291.30,	45.7	2.9	4.56	0.00113262
BP	GO:0051276	chromosome organization	91	30	TcCLB.504839.50,TcCLB.507031.29,TcCLB.507033.20,TcCLB.507057.30,TcCLB.507601.150,TcCLB.507601.160,TcCLB.507601.170,TcCLB.507943.10,TcCLB.507943.20,TcCLB.507943.30,TcCLB.507943.40,TcCLB.508593.110,TcCLB.508699.10,TcCLB.508817.80,TcCLB.508851.170,TcCLB.509207.20,TcCLB.509471.59,TcCLB.509471.68,TcCLB.509471.77,TcCLB.509471.86,TcCLB.509471.95,TcCLB.509553.50,TcCLB.509791.120,TcCLB.509793.10,TcCLB.509…	33	2.09	2.68	0.0013934
BP	GO:0006457	protein folding	118	34	TcCLB.503721.39,TcCLB.504003.60,TcCLB.504131.100,TcCLB.506247.50,TcCLB.506435.390,TcCLB.506585.40,TcCLB.506989.190,TcCLB.507029.30,TcCLB.507513.50,TcCLB.508409.210,TcCLB.508443.20,TcCLB.508461.410,TcCLB.508577.140,TcCLB.508661.30,TcCLB.508707.224,TcCLB.508737.100,TcCLB.508881.10,TcCLB.508897.110,TcCLB.508911.20,TcCLB.509045.20,TcCLB.509053.130,TcCLB.509057.10,TcCLB.509063.30,TcCLB.509215.40,TcCLB…	28.8	1.83	2.2	0.00904653
BP	GO:0065003	protein-containing complex assembly	59	20	TcCLB.503929.20,TcCLB.504839.50,TcCLB.505071.100,TcCLB.506883.40,TcCLB.506975.63,TcCLB.507031.29,TcCLB.507601.150,TcCLB.507601.160,TcCLB.507601.170,TcCLB.507943.10,TcCLB.507943.20,TcCLB.507943.30,TcCLB.507943.40,TcCLB.508173.264,TcCLB.508351.40,TcCLB.508707.224,TcCLB.509719.69,TcCLB.511237.100,TcCLB.511287.90,TcCLB.511837.20,	33.9	2.15	2.78	0.0186084
BP	GO:0022607	cellular component assembly	109	28	TcCLB.503465.30,TcCLB.503929.20,TcCLB.504839.50,TcCLB.505071.100,TcCLB.506559.380,TcCLB.506679.60,TcCLB.506883.40,TcCLB.506975.63,TcCLB.507031.29,TcCLB.507601.150,TcCLB.507601.160,TcCLB.507601.170,TcCLB.507943.10,TcCLB.507943.20,TcCLB.507943.30,TcCLB.507943.40,TcCLB.508173.264,TcCLB.508351.40,TcCLB.508409.40,TcCLB.508707.224,TcCLB.508817.80,TcCLB.509641.50,TcCLB.509719.69,TcCLB.509721.30,TcCLB.51…	25.7	1.63	1.87	0.204348
BP	GO:0042592	homeostatic process	60	17	TcCLB.503555.30,TcCLB.504741.180,TcCLB.506443.70,TcCLB.506559.200,TcCLB.506679.60,TcCLB.508351.40,TcCLB.508501.230,TcCLB.508707.227,TcCLB.509505.10,TcCLB.509553.50,TcCLB.509641.50,TcCLB.509997.30,TcCLB.510993.10,TcCLB.511025.110,TcCLB.511239.110,TcCLB.511385.30,TcCLB.511717.80,	28.3	1.8	2.13	0.395301
CC	GO:0005739	mitochondrion	825	231	TcCLB.407335.9,TcCLB.422921.20,TcCLB.425785.18,TcCLB.431357.10,TcCLB.453445.10,TcCLB.460127.20,TcCLB.467287.30,TcCLB.503465.30,TcCLB.503465.49,TcCLB.503603.10,TcCLB.503681.20,TcCLB.503703.40,TcCLB.503769.40,TcCLB.503823.60,TcCLB.503929.20,TcCLB.503935.20,TcCLB.503939.20,TcCLB.503999.30,TcCLB.504069.80,TcCLB.504071.30,TcCLB.504131.180,TcCLB.504131.190,TcCLB.504741.170,TcCLB.504949.30,TcCLB.505071.…	28	1.77	2.42	3.77749e-21
CC	GO:0005773	vacuole	124	53	TcCLB.455721.9,TcCLB.503815.10,TcCLB.503837.10,TcCLB.503929.10,TcCLB.503999.30,TcCLB.504069.70,TcCLB.504069.80,TcCLB.504949.30,TcCLB.506219.40,TcCLB.506247.220,TcCLB.506275.20,TcCLB.506295.70,TcCLB.506297.190,TcCLB.506585.40,TcCLB.506629.40,TcCLB.506839.70,TcCLB.506977.60,TcCLB.506989.190,TcCLB.507029.30,TcCLB.507623.129,TcCLB.507715.34,TcCLB.507777.20,TcCLB.508153.130,TcCLB.508461.10,TcCLB.50850…	42.7	2.71	4.16	7.26232e-12
CC	GO:0005634	nucleus	1489	294	TcCLB.401469.20,TcCLB.416511.9,TcCLB.453445.20,TcCLB.503555.30,TcCLB.503563.10,TcCLB.503603.10,TcCLB.503681.20,TcCLB.503687.30,TcCLB.503797.10,TcCLB.503823.130,TcCLB.503823.84,TcCLB.503869.50,TcCLB.503911.20,TcCLB.503939.20,TcCLB.503987.60,TcCLB.503999.10,TcCLB.504013.55,TcCLB.504021.100,TcCLB.504045.114,TcCLB.504069.90,TcCLB.504079.6,TcCLB.504085.20,TcCLB.504105.150,TcCLB.504109.140,TcCLB.504113…	19.7	1.25	1.45	2.08043e-05
CC	GO:0005783	endoplasmic reticulum	157	48	TcCLB.503563.10,TcCLB.503687.30,TcCLB.503891.40,TcCLB.503925.80,TcCLB.503929.79,TcCLB.503999.10,TcCLB.504131.100,TcCLB.504131.60,TcCLB.504157.120,TcCLB.504231.10,TcCLB.505163.80,TcCLB.506297.240,TcCLB.506297.260,TcCLB.506581.10,TcCLB.506585.40,TcCLB.506959.64,TcCLB.506959.94,TcCLB.506989.190,TcCLB.507031.64,TcCLB.507897.20,TcCLB.507969.30,TcCLB.507969.60,TcCLB.507969.70,TcCLB.508173.84,TcCLB.5082…	30.6	1.94	2.42	3.17066e-05
CC	GO:0005777	peroxisome	135	43	TcCLB.460127.20,TcCLB.474937.9,TcCLB.503555.30,TcCLB.503815.10,TcCLB.505999.90,TcCLB.506219.40,TcCLB.506297.190,TcCLB.506435.270,TcCLB.506581.10,TcCLB.506619.10,TcCLB.507059.60,TcCLB.507515.4,TcCLB.507519.140,TcCLB.508153.340,TcCLB.508153.640,TcCLB.508299.70,TcCLB.508577.140,TcCLB.508601.119,TcCLB.508851.59,TcCLB.508909.20,TcCLB.509065.60,TcCLB.509065.70,TcCLB.509179.100,TcCLB.509237.10,TcCLB.509…	31.9	2.02	2.57	3.30505e-05
MF	GO:0016491	oxidoreductase activity	236	69	TcCLB.426435.9,TcCLB.503555.30,TcCLB.503815.10,TcCLB.503999.10,TcCLB.505183.30,TcCLB.506219.40,TcCLB.506275.30,TcCLB.506297.260,TcCLB.506337.160,TcCLB.506443.70,TcCLB.506485.80,TcCLB.506629.220,TcCLB.506831.40,TcCLB.506839.34,TcCLB.506839.70,TcCLB.506959.64,TcCLB.506999.90,TcCLB.507017.40,TcCLB.507057.40,TcCLB.507061.30,TcCLB.507515.4,TcCLB.507615.70,TcCLB.507665.30,TcCLB.507897.20,TcCLB.507969.6…	29.2	1.85	2.3	2.77743e-06
MF	GO:0003677	DNA binding	182	47	TcCLB.416511.9,TcCLB.503823.84,TcCLB.504109.140,TcCLB.505997.210,TcCLB.506241.50,TcCLB.506561.10,TcCLB.506629.30,TcCLB.506835.120,TcCLB.507033.20,TcCLB.507063.90,TcCLB.507601.150,TcCLB.507601.160,TcCLB.507601.170,TcCLB.507913.30,TcCLB.507915.19,TcCLB.507943.10,TcCLB.507943.20,TcCLB.507943.30,TcCLB.507943.40,TcCLB.507943.5,TcCLB.507951.114,TcCLB.508409.338,TcCLB.508699.10,TcCLB.508851.170,TcCLB.50…	25.8	1.64	1.9	0.0103687
MF	GO:0016829	lyase activity	59	20	TcCLB.407335.9,TcCLB.504045.110,TcCLB.504069.90,TcCLB.504105.140,TcCLB.506247.220,TcCLB.506905.50,TcCLB.507059.60,TcCLB.507081.130,TcCLB.508175.360,TcCLB.508177.110,TcCLB.508177.120,TcCLB.508459.18,TcCLB.508857.160,TcCLB.509899.110,TcCLB.509937.20,TcCLB.510301.10,TcCLB.510301.20,TcCLB.510329.270,TcCLB.511165.54,TcCLB.511281.40,	33.9	2.15	2.78	0.0168362
MF	GO:0022857	transmembrane transporter activity	144	38	TcCLB.450161.10,TcCLB.467287.30,TcCLB.503563.10,TcCLB.503929.10,TcCLB.504069.70,TcCLB.504069.80,TcCLB.504131.180,TcCLB.504141.9,TcCLB.504797.140,TcCLB.506247.210,TcCLB.506297.240,TcCLB.506821.170,TcCLB.506821.180,TcCLB.506833.70,TcCLB.506977.70,TcCLB.507241.39,TcCLB.507517.60,TcCLB.507623.129,TcCLB.508257.140,TcCLB.508397.10,TcCLB.508737.210,TcCLB.508741.229,TcCLB.508821.50,TcCLB.508851.59,TcCLB.…	26.4	1.67	1.95	0.0249449
MF	GO:0016765	transferase activity, transferring alkyl or aryl (other than methyl) groups	18	8	TcCLB.503815.10,TcCLB.506195.300,TcCLB.507897.20,TcCLB.510337.40,TcCLB.510339.50,TcCLB.510445.50,TcCLB.510903.60,TcCLB.511823.70,	44.4	2.82	4.3	0.141064
KEGG	ec00720	Carbon fixation pathways in prokaryotes	36	19	TcCLB.474937.9,TcCLB.504071.30,TcCLB.504949.30,TcCLB.506219.40,TcCLB.506263.10,TcCLB.506263.20,TcCLB.506263.30,TcCLB.506297.190,TcCLB.506727.100,TcCLB.507681.20,TcCLB.508153.130,TcCLB.508479.340,TcCLB.509509.20,TcCLB.509717.90,TcCLB.510099.120,TcCLB.510329.270,TcCLB.510437.40,TcCLB.511287.49,TcCLB.511909.40,	52.8	3.12	5.74	9.50589e-05
KEGG	ec00362	Benzoate degradation	33	17	TcCLB.504071.30,TcCLB.506219.40,TcCLB.506263.10,TcCLB.506263.20,TcCLB.506263.30,TcCLB.506727.100,TcCLB.508153.130,TcCLB.508173.100,TcCLB.509235.20,TcCLB.509463.30,TcCLB.509717.90,TcCLB.510099.120,TcCLB.510121.40,TcCLB.511287.49,TcCLB.511635.40,TcCLB.511895.69,TcCLB.511907.50,	51.5	3.05	5.42	0.000581362
KEGG	ec00710	Carbon fixation in photosynthetic organisms	28	15	TcCLB.505999.90,TcCLB.506297.190,TcCLB.506619.10,TcCLB.506835.70,TcCLB.508601.119,TcCLB.509065.60,TcCLB.509065.70,TcCLB.509717.80,TcCLB.510187.60,TcCLB.510301.10,TcCLB.510301.20,TcCLB.510437.40,TcCLB.510889.120,TcCLB.510889.140,TcCLB.511903.120,	53.6	3.17	5.87	0.00116363
KEGG	ec00260	Glycine, serine and threonine metabolism	39	17	TcCLB.503597.10,TcCLB.506905.50,TcCLB.508175.360,TcCLB.508177.110,TcCLB.508177.120,TcCLB.508177.129,TcCLB.508457.30,TcCLB.508677.80,TcCLB.508741.170,TcCLB.508857.160,TcCLB.509331.210,TcCLB.509937.150,TcCLB.511025.110,TcCLB.511229.20,TcCLB.511277.60,TcCLB.511899.10,TcCLB.511899.40,	43.6	2.58	3.93	0.00939487
KEGG	ec00625	Chloroalkane and chloroalkene degradation	17	10	TcCLB.506219.40,TcCLB.506263.10,TcCLB.506263.20,TcCLB.506263.30,TcCLB.508677.80,TcCLB.509331.210,TcCLB.509749.39,TcCLB.510099.120,TcCLB.511277.60,TcCLB.511287.49,	58.8	3.48	7.19	0.013919
KEGG	ec00640	Propanoate metabolism	32	14	TcCLB.474937.9,TcCLB.506219.40,TcCLB.506263.10,TcCLB.506263.20,TcCLB.506263.30,TcCLB.506727.100,TcCLB.506727.90,TcCLB.507681.20,TcCLB.507767.10,TcCLB.508153.130,TcCLB.508479.340,TcCLB.510099.120,TcCLB.511025.110,TcCLB.511287.49,	43.8	2.59	3.93	0.0395758

## Sheet: Pd-dppf-mpo DNA binding
DNA binding	Product Description	Gene ID	Fold Change
DNA protein repair	DNA mismatch repair protein MSH6, putative	TcCLB.510187.430	-1.70578
	DNA repair protein, putative	TcCLB.508409.338	-1.65549
	DNA repair protein, putative	TcCLB.511807.64	-2.71948
	mismatch repair protein MSH3, putative	TcCLB.416511.9	-1.65676
	mismatch repair protein MSH3, putative	TcCLB.507915.19	-1.54404
Topoisomerases	DNA topoisomerase II, putative	TcCLB.508699.10	-1.51545
	DNA topoisomerase III, putative	TcCLB.508851.170	-1.83887
	DNA topoisomerase III, putative	TcCLB.510901.100	-1.74783
RNA polymerases	DNA-directed rna polymerase I largest subunit, putative	TcCLB.511381.40	-1.63578
	DNA-directed RNA polymerase I subunit, putative	TcCLB.504109.140	-3.01074
	DNA-directed RNA polymerase III subunit C11, putative	TcCLB.511291.120	-2.24443
	DNA-directed RNA polymerase III subunit, putative	TcCLB.505997.210	-1.5719
	DNA-directed RNA polymerase III, putative	TcCLB.509487.4	-1.87599
	DNA-directed RNA polymerase, putative	TcCLB.503823.84	-1.77504
Histones	histone H2A variant Z	TcCLB.511323.40	-1.77102
	histone H2A, putative	TcCLB.509207.20	-1.52627
	histone H2A, putative	TcCLB.511817.180	-1.58581
	Histone H2B variant V	TcCLB.511153.64	-1.54494
	histone H3 variant V	TcCLB.507033.20	-1.66929
	histone H3, putative	TcCLB.509471.59	-1.51944
	histone H3, putative	TcCLB.509471.68	-1.55148
	histone H3, putative	TcCLB.509471.77	-1.52959
	histone H3, putative	TcCLB.509471.86	-1.57104
	histone H3, putative	TcCLB.509471.95	-1.93043
	histone H4, putative	TcCLB.507601.150	-1.82834
	histone H4, putative	TcCLB.507601.160	-1.88887
	histone H4, putative	TcCLB.507601.170	-1.75074
	histone H4, putative	TcCLB.507943.10	-2.09589
	histone H4, putative	TcCLB.507943.20	-2.09216
	histone H4, putative	TcCLB.507943.30	-2.05562
	histone H4, putative	TcCLB.507943.40	-1.87219
	histone H4, putative	TcCLB.507943.5	-1.87579
Mitochondrial DNA and RNA associated proteins	kinetoplast-associated protein	TcCLB.509791.120	-1.65606
	kinetoplast-associated protein	TcCLB.509793.40	-2.71468
	kinetoplast-associated protein 4	TcCLB.509793.10	-1.84374
	mitochondrial DNA polymerase beta, putative	TcCLB.507063.90	-1.66317
	mitochondrial RNA-binding protein 2, putative	TcCLB.510359.270	-1.88626
	guide RNA-binding protein of 21 kDa	TcCLB.506629.30	-2.57996
DNA replication factors	proliferative cell nuclear antigen (PCNA), putative	TcCLB.507913.30	-2.35563
	Replication factor A protein 1	TcCLB.510901.60	-1.89469
	replication factor A protein 3, putative	TcCLB.510665.30	-1.73805
	DNA ligase I, putative	TcCLB.506835.120	-1.78444
Other	'Cold-shock' DNA-binding domain containing protein, putative	TcCLB.509935.20	-1.72174
	hypothetical protein, conserved	TcCLB.506241.50	-1.54144
	helicase-like protein, putative	TcCLB.506561.10	-1.52613
	High mobility group protein TDP1	TcCLB.507951.114	-2.39781
	Mad2-like HORMA domain containing protein	TcCLB.510421.290	-1.62319

## Sheet: Pd-dppf-mpo Protein metabolism
Protein Metabolism	Product Description	Gene ID	Fold change
Ribosome biogenesis	Beta propeller protein 1	TcCLB.508649.10	-1.58971
	centromere/microtubule binding protein cbf5, putative	TcCLB.504069.90	-2.14523
	exosome-associated protein 1, putative	TcCLB.503869.50	-1.69617
	exosome-associated protein 2, putative	TcCLB.504085.20	-1.525
	exosome-associated protein 4, putative	TcCLB.508269.60	-2.29691
	fibrillarin, putative	TcCLB.509715.40	-3.30422
	fibrillarin, putative	TcCLB.511287.150	-2.46222
	hypothetical protein, conserved	TcCLB.506123.50	-1.65029
	hypothetical protein, conserved	TcCLB.509161.20	-2.49265
	hypothetical protein, conserved	TcCLB.511237.100	-1.70385
	hypothetical protein, conserved	TcCLB.511837.20	-1.50477
	Methyltransferase domain/Methyltransferase involved in Williams-Beuren syndrome, putative	TcCLB.503923.30	-1.5057
	Nucleolar protein 136, putative	TcCLB.510899.59	-1.92754
	nucleolar protein, putative	TcCLB.507583.20	-2.86481
	PQQ-like domain/WD domain, G-beta repeat/Utp21 specific WD40 associated putative domain containing protein	TcCLB.503823.130	-1.55533
	pumilio/PUF RNA binding protein 7, putative	TcCLB.401469.20	-1.52366
	pumilio/PUF RNA binding protein 7, putative	TcCLB.508445.99	-1.64466
	ribosomal protein L13, putative	TcCLB.503929.20	-1.51752
	Ribosomal RNA processing protein 41A	TcCLB.509715.9	-1.60701
	ribosomal RNA processing protein 45, putative	TcCLB.511825.260	-1.66539
	ribosome biogenesis protein, putative	TcCLB.511287.90	-2.15209
	ribosome biogenesis regulatory protein (RRS1), putative	TcCLB.507019.30	-1.65385
	rotamase, putative	TcCLB.510947.50	-5.53821
	rRNA processing protein, putative	TcCLB.509671.120	-1.50105
	snoRNP protein GAR1, putative	TcCLB.510687.120	-2.47943
	U3 small nucleolar RNA-associated protein 6, putative	TcCLB.506241.200	-1.88635
Cellular amino acid metabolic process	2-amino-3-ketobutyrate coenzyme A ligase, putative	TcCLB.511899.10	-3.24232
	2-amino-3-ketobutyrate coenzyme A ligase, putative	TcCLB.511899.40	-3.30901
	acetylornithine deacetylase-like, putative	TcCLB.508971.40	-1.71908
	agmatinase, putative	TcCLB.510947.40	-1.74174
	asparagine synthetase a, putative	TcCLB.503625.10	-3.17404
	asparaginyl-tRNA synthetase, putative	TcCLB.506559.350	-2.45076
	aspartyl-tRNA synthetase, putative	TcCLB.509037.50	-1.62721
	aspartyl-tRNA synthetase, putative	TcCLB.509695.10	-1.90955
	delta-1-pyrroline-5-carboxylate dehydrogenase, putative	TcCLB.510943.50	-4.9434
	glutamic--pyruvic transaminase, putative	TcCLB.510889.120	-2.65956
	glutamic--pyruvic transaminase, putative	TcCLB.510889.140	-2.60872
	glutamine synthetase, putative	TcCLB.508175.370	-3.1365
	histidine ammonia-lyase, putative	TcCLB.506247.220	-3.06413
	histidyl-tRNA synthetase	TcCLB.507019.40	-1.89396
	homoserine kinase	TcCLB.503597.10	-1.7743
	imidazolonepropionase, putative	TcCLB.508741.140	-1.64212
	leucyl-tRNA synthetase, putative	TcCLB.509679.9	-1.66916
	lipoic acid containing carrier protein, putative	TcCLB.508457.30	-1.85373
	lysyl-tRNA synthetase, putative	TcCLB.508971.30	-2.94217
	mercaptopyruvate sulfurtransferase, putative	TcCLB.508173.40	-2.48599
	metallo-peptidase, clan MH, family M18, putative	TcCLB.511391.120	-1.50754
	methylthioadenosine phosphorylase, putative	TcCLB.506789.280	-4.24543
	phenylalanyl-tRNA synthetase alpha chain, putative	TcCLB.511727.140	-2.0725
	pyrroline-5-carboxylate reductase, putative	TcCLB.509207.90	-2.92406
	selenophosphate synthetase, putative	TcCLB.504079.6	-1.95318
	serine hydroxymethyltransferase, putative	TcCLB.509937.150	-2.06098
	serine sulfhydrylase	TcCLB.506905.50	-1.8216
	serine sulfhydrylase	TcCLB.508175.360	-1.78723
	serine sulfhydrylase	TcCLB.508177.110	-1.7463
	serine sulfhydrylase	TcCLB.508177.120	-1.84453
	threonine synthase, putative	TcCLB.508857.160	-1.87455
	tryptophanyl-tRNA synthetase, putative	TcCLB.510647.30	-2.74839
	tyrosine aminotransferase, putative	TcCLB.510187.70	-2.21986
Protein folding	ATP-dependent Clp protease subunit, heat shock protein 78, putative	TcCLB.508737.100	-2.00125
	chaperone DNAJ protein, putative	TcCLB.509911.100	-1.65067
	chaperone DNAJ protein, putative	TcCLB.511025.100	-1.57749
	chaperone DNAJ protein, putative	TcCLB.511367.138	-1.65167
	chaperonin alpha subunit, putative	TcCLB.511025.70	-2.88138
	chaperonin containing t-complex protein, putative	TcCLB.511725.250	-2.06232
	chaperonin HSP60/CNP60, putative	TcCLB.509063.30	-2.95054
	chaperonin/T-complex protein 1 gamma subunit, putative	TcCLB.504003.60	-1.64825
	co-chaperone GrpE, putative	TcCLB.509045.20	-2.35336
	cyclophilin, putative	TcCLB.508577.140	-1.80668
	cyclophilin, putative	TcCLB.511237.110	-1.74095
	DnaJ chaperone protein, putative	TcCLB.504131.100	-1.69638
	DnaJ chaperone protein, putative	TcCLB.508661.30	-1.55023
	DnaJ chaperone protein, putative	TcCLB.509053.130	-1.75339
	DnaJ homolog, putative	TcCLB.508443.20	-1.65157
	glucose-regulated protein 78, putative	TcCLB.506585.40	-2.54421
	heat shock 70 kDa protein, mitochondrial precursor, putative	TcCLB.507029.30	-2.18022
	heat shock 70 kDa protein, mitochondrial precursor, putative	TcCLB.511515.40	-2.07843
	heat shock 70 kDa protein, putative	TcCLB.503721.39	-1.95219
	heat shock 70 kDa protein, putative	TcCLB.507513.50	-2.83331
	heat shock protein 90, putative	TcCLB.506989.190	-1.5059
	Hsc70-interacting protein, putative	TcCLB.508409.210	-1.72591
	hypothetical protein, conserved	TcCLB.508881.10	-1.54954
	hypothetical protein, conserved	TcCLB.508911.20	-1.5012
	hypothetical protein, conserved	TcCLB.509057.10	-1.60376
	macrophage infectivity potentiator, precursor, putative	TcCLB.508897.110	-2.50265
	mitochondrial ATP-dependent zinc metallopeptidase, putative	TcCLB.506435.390	-1.61272
	peptidyl-prolyl cis-trans isomerase, putative	TcCLB.509215.40	-3.88328
	protein disulfide isomerase, putative	TcCLB.509505.10	-1.99027
	rotamase, putative	TcCLB.510667.60	-1.78546
	rotamase, putative	TcCLB.510947.50	-5.53821
	T-complex protein 1, eta subunit, putative	TcCLB.508461.410	-2.81293
	T-complex protein 1, theta subunit, putative	TcCLB.506247.50	-2.10097
	tubulin binding cofactor A-like protein, putative	TcCLB.508707.224	-1.67353

## Sheet: Pd-dppf-mpo Transporters
Transmembrane transporters	Product Description	Gene ID	Fold Change
	(H+)-ATPase G subunit	TcCLB.510993.10	-1.75419
	ABC transporter of the mitochondrion, putative	TcCLB.511021.70	-1.61553
	ABC transporter, putative	TcCLB.507241.39	-1.89973
	ADP/ATP mitochondrial carrier protein, putative	TcCLB.511249.10	-1.81409
	Aquaporin 2	TcCLB.508257.140	-1.77861
	aquaporin-like protein, putative	TcCLB.506821.170	-1.54442
	aquaporin-like protein, putative	TcCLB.506821.180	-1.59163
	Archaic translocase of outer membrane 11 kDa subunit, putative	TcCLB.509643.70	-2.69397
	Archaic translocase of outer membrane 12 kDa subunit, putative	TcCLB.509569.44	-1.60029
	ATP synthase F1 subunit gamma protein, putative	TcCLB.504069.80	-1.97967
	ATP synthase subunit, putative	TcCLB.510889.231	-2.61967
	ATP synthase, putative	TcCLB.508851.59	-1.81648
	ATPase beta subunit, putative	TcCLB.467287.30	-2.71571
	ATPase subunit 9, putative	TcCLB.504131.180	-2.15237
	ATPase subunit 9, putative	TcCLB.506977.70	-2.03157
	ATPase subunit 9, putative	TcCLB.507517.60	-2.73652
	ATP-binding cassette sub-family F member 1, putative	TcCLB.509105.130	-1.93762
	Calcium ATPase SERCA-like	TcCLB.503563.10	-1.96946
	calcium-translocating P-type ATPase, putative	TcCLB.504141.9	-1.93699
	cation transporter, putative	TcCLB.450161.10	-3.16073
	cationic amino acid transporter, putative	TcCLB.506833.70	-1.51012
	chaperonin HSP60/CNP60, putative	TcCLB.509063.30	-2.95054
	chloride channel protein, putative	TcCLB.510575.130	-1.5858
	CLC-type chloride channel, putative	TcCLB.504797.140	-1.7632
	CorA-like Mg2+ transporter protein, putative	TcCLB.509437.60	-1.58316
	ER--golgi transport protein gp25L, putative	TcCLB.509671.90	-1.57838
	hypothetical protein, conserved	TcCLB.506247.210	-2.07727
	hypothetical protein, conserved	TcCLB.509437.70	-2.06254
	hypothetical protein, conserved	TcCLB.511245.24	-1.73846
	hypothetical protein, conserved	TcCLB.509561.70	-2.20157
	hypothetical protein, conserved	TcCLB.511817.280	-1.62984
	inositol 1,4,5-trisphosphate receptor, putative	TcCLB.509461.90	-2.14891
	Mechanosensitive ion channel MscS, putative	TcCLB.509795.40	-1.95784
	Mitochondrial import receptor subunit ATOM40, putative	TcCLB.510729.80	-2.4122
	Mitochondrial outer membrane protein porin, putative	TcCLB.508737.210	-2.39585
	Mitochondrial outer membrane protein porin, putative	TcCLB.508741.229	-2.27916
	Mitochondrial pyruvate carrier 1	TcCLB.509337.19	-4.7365
	Mitochondrial pyruvate carrier 2	TcCLB.506443.40	-2.22659
	Mitochondrial-processing peptidase subunit alpha	TcCLB.508441.80	-1.83755
	peripherally associated ATOM36	TcCLB.508173.264	-1.75556
	protein transport protein SEC61 subunit alpha, putative	TcCLB.506297.240	-1.93017
	transporter, putative	TcCLB.511281.20	-1.63109
	tricarboxylate carrier, putative	TcCLB.510153.19	-3.95
	vacuolar ATP synthase, putative	TcCLB.504069.70	-1.67669
	Vacuolar proton pump subunit B, putative	TcCLB.511209.10	-1.96858
	vacuolar type h+ ATPase subunit, putative	TcCLB.507623.129	-1.85284
	vacuolar type h+ ATPase subunit, putative	TcCLB.508821.50	-2.01464
	vacuolar-type proton translocating pyrophosphatase 1	TcCLB.511385.30	-1.74855
	V-type ATPase, A subunit, putative	TcCLB.503929.10	-1.93564
	V-type proton ATPase subunit a, putative	TcCLB.509601.70	-1.78617
	V-type proton ATPase subunit D, putative	TcCLB.508397.10	-1.69841

## Sheet: Pt-dppf-mpo
Pt-dppf-mpo up-regulated genes
	ID	Name	Bgd count	Result count	Result gene list	Pct of bgd	Fold enrichment	Odds ratio	Bonferroni
BP	GO:0006950	response to stress	113	5	TcCLB.506193.60,TcCLB.509105.140,TcCLB.509105.150,TcCLB.509643.130,TcCLB.509643.139,	4.4	4.28	4.73	0.0419419
MF	GO:0051082	unfolded protein binding	49	4	TcCLB.509105.140,TcCLB.509105.150,TcCLB.509643.130,TcCLB.509643.139,	8.2	7.89	9.03	0.0248114
Pt-dppf-mpo down-regulated genes
	ID	Name	Bgd count	Result count	Result gene list	Pct of bgd	Fold enrichment	Odds ratio	Bonferroni
BP	GO:0042254	ribosome biogenesis	72	11	TcCLB.503923.30,TcCLB.504069.90,TcCLB.507583.20,TcCLB.508269.60,TcCLB.509161.20,TcCLB.509715.40,TcCLB.510423.40,TcCLB.510687.120,TcCLB.510947.50,TcCLB.511287.150,TcCLB.511287.90,	15.3	8.4	10.72	1.3906e-06
BP	GO:0006457	protein folding	118	9	TcCLB.504003.60,TcCLB.506247.50,TcCLB.507513.50,TcCLB.508461.410,TcCLB.508897.110,TcCLB.510947.50,TcCLB.511025.70,TcCLB.511367.138,TcCLB.511725.250,	7.6	4.2	4.77	0.00720877
BP	GO:0044281	small molecule metabolic process	330	16	TcCLB.503625.10,TcCLB.505183.30,TcCLB.506247.330,TcCLB.507017.40,TcCLB.507519.140,TcCLB.507913.20,TcCLB.508153.640,TcCLB.508173.40,TcCLB.508971.30,TcCLB.509693.80,TcCLB.510445.50,TcCLB.510943.50,TcCLB.511281.40,TcCLB.511727.140,TcCLB.511899.10,TcCLB.511899.40,	4.8	2.67	3.05	0.00732066
BP	GO:0006790	sulfur compound metabolic process	35	5	TcCLB.507913.20,TcCLB.508173.40,TcCLB.509319.90,TcCLB.510445.50,TcCLB.511281.40,	14.3	7.86	9.39	0.0102767
CC	GO:0005829	cytosol	144	12	TcCLB.504003.60,TcCLB.506195.300,TcCLB.506247.330,TcCLB.506247.50,TcCLB.506275.20,TcCLB.508173.40,TcCLB.508461.410,TcCLB.509319.90,TcCLB.510155.180,TcCLB.511025.70,TcCLB.511281.40,TcCLB.511725.250,	8.3	4.58	5.39	0.000128474
CC	GO:0005634	nucleus	1489	40	TcCLB.504069.90,TcCLB.504113.30,TcCLB.504839.50,TcCLB.506247.330,TcCLB.506247.40,TcCLB.506247.450,TcCLB.506275.20,TcCLB.506583.10,TcCLB.506821.110,TcCLB.507031.29,TcCLB.507519.140,TcCLB.507583.20,TcCLB.507649.70,TcCLB.507913.20,TcCLB.508027.70,TcCLB.508173.180,TcCLB.508269.60,TcCLB.508355.160,TcCLB.508411.10,TcCLB.508593.110,TcCLB.508815.70,TcCLB.509161.20,TcCLB.509237.50,TcCLB.509693.80,TcCLB.50…	2.7	1.48	1.78	0.0471955
CC	GO:0005773	vacuole	124	7	TcCLB.506275.20,TcCLB.507053.180,TcCLB.508153.1100,TcCLB.509053.70,TcCLB.509799.140,TcCLB.510003.20,TcCLB.510943.50,	5.6	3.11	3.38	0.0925385
MF	GO:0003723	RNA binding	423	23	TcCLB.503945.10,TcCLB.504069.90,TcCLB.506297.300,TcCLB.506583.10,TcCLB.507583.20,TcCLB.507649.70,TcCLB.507765.130,TcCLB.508027.70,TcCLB.508269.30,TcCLB.508479.350,TcCLB.508641.184,TcCLB.509105.90,TcCLB.509161.20,TcCLB.509715.40,TcCLB.510003.20,TcCLB.510155.180,TcCLB.510687.120,TcCLB.510947.50,TcCLB.511287.150,TcCLB.511287.90,TcCLB.511367.60,TcCLB.511383.40,TcCLB.511727.140,	5.4	2.99	3.67	4.25902e-05
MF	GO:0019843	rRNA binding	13	5	TcCLB.509161.20,TcCLB.509715.40,TcCLB.510687.120,TcCLB.510947.50,TcCLB.511287.90,	38.5	21.16	35.33	6.22684e-05
MF	GO:0008168	methyltransferase activity	72	8	TcCLB.503923.30,TcCLB.506821.110,TcCLB.507583.20,TcCLB.508593.110,TcCLB.509237.50,TcCLB.509715.40,TcCLB.511287.150,TcCLB.511389.130,	11.1	6.11	7.21	0.0012599
MF	GO:0051082	unfolded protein binding	49	6	TcCLB.504003.60,TcCLB.506247.50,TcCLB.508461.410,TcCLB.511025.70,TcCLB.511367.138,TcCLB.511725.250,	12.2	6.74	7.92	0.00698548
KEGG	ec00523	Polyketide sugar unit biosynthesis	53	9	TcCLB.503923.30,TcCLB.506263.30,TcCLB.506821.110,TcCLB.507583.20,TcCLB.508593.110,TcCLB.509237.50,TcCLB.509715.40,TcCLB.510099.120,TcCLB.511287.150,	17	6.72	9.24	0.000445687
KEGG	ec00270	Cysteine and methionine metabolism	81	10	TcCLB.503923.30,TcCLB.506821.110,TcCLB.507583.20,TcCLB.508173.40,TcCLB.508269.30,TcCLB.508593.110,TcCLB.509237.50,TcCLB.509715.40,TcCLB.510445.50,TcCLB.511287.150,	12.3	4.88	6.42	0.00240052
KEGG	ec01057	Biosynthesis of type II polyketide products	85	10	TcCLB.503923.30,TcCLB.506263.30,TcCLB.506821.110,TcCLB.507583.20,TcCLB.508593.110,TcCLB.509237.50,TcCLB.509715.40,TcCLB.510099.120,TcCLB.510299.50,TcCLB.511287.150,	11.8	4.65	6.06	0.00370029
KEGG	ec00950	Isoquinoline alkaloid biosynthesis	74	9	TcCLB.503923.30,TcCLB.506263.30,TcCLB.506821.110,TcCLB.507583.20,TcCLB.508593.110,TcCLB.509237.50,TcCLB.509715.40,TcCLB.510099.120,TcCLB.511287.150,	12.2	4.81	6.19	0.0073802
KEGG	ec00450	Selenocompound metabolism	43	7	TcCLB.503923.30,TcCLB.506821.110,TcCLB.507583.20,TcCLB.508593.110,TcCLB.509237.50,TcCLB.509715.40,TcCLB.511287.150,	16.3	6.44	8.45	0.00783053
KEGG	ec00627	Aminobenzoate degradation	67	8	TcCLB.503923.30,TcCLB.504069.90,TcCLB.506821.110,TcCLB.507583.20,TcCLB.508593.110,TcCLB.509237.50,TcCLB.509715.40,TcCLB.511287.150,	11.9	4.72	5.95	0.022407
KEGG	ec00333	Prodigiosin biosynthesis	51	7	TcCLB.503923.30,TcCLB.506821.110,TcCLB.507583.20,TcCLB.508593.110,TcCLB.509237.50,TcCLB.509715.40,TcCLB.511287.150,	13.7	5.43	6.88	0.0240498
KEGG	ec00624	Polycyclic aromatic hydrocarbon degradation	52	7	TcCLB.503923.30,TcCLB.506821.110,TcCLB.507583.20,TcCLB.508593.110,TcCLB.509237.50,TcCLB.509715.40,TcCLB.511287.150,	13.5	5.33	6.73	0.0272512
KEGG	ec00945	Stilbenoid, diarylheptanoid and gingerol biosynthesis	74	8	TcCLB.503923.30,TcCLB.506821.110,TcCLB.507583.20,TcCLB.508593.110,TcCLB.509237.50,TcCLB.509715.40,TcCLB.510299.50,TcCLB.511287.150,	10.8	4.28	5.3	0.0451319

## Sheet: Pt-dppf-mpo Protein metabolism
Protein metabolism	Product description	Gene ID	Fold change
Protein folding and unfolded protein binding	chaperonin/T-complex protein 1 gamma subunit, putative	TcCLB.504003.60	-1.58967
	T-complex protein 1, theta subunit, putative	TcCLB.506247.50	-1.51423
	heat shock 70 kDa protein, putative	TcCLB.507513.50	-1.61921
	T-complex protein 1, eta subunit, putative	TcCLB.508461.410	-1.61621
	macrophage infectivity potentiator, precursor, putative	TcCLB.508897.110	-1.58392
	cyclophilin, putative	TcCLB.510947.50	-2.53848
	chaperonin alpha subunit, putative	TcCLB.511025.70	-1.85035
	chaperone DNAJ protein, putative	TcCLB.511367.138	-1.77443
	chaperonin containing t-complex protein, putative	TcCLB.511725.250	-1.6502
Ribosome biogenesis	hypothetical protein, conserved	TcCLB.503923.30	-1.56701
	centromere/microtubule binding protein cbf5, putative	TcCLB.504069.90	-1.52015
	nucleolar protein, putative	TcCLB.507583.20	-2.09599
	exosome-associated protein 4, putative	TcCLB.508269.60	-1.72967
	hypothetical protein, conserved	TcCLB.509161.20	-1.51427
	fibrillarin, putative	TcCLB.509715.40	-1.90755
	hypothetical protein, conserved	TcCLB.510423.40	-1.51997
	snoRNP protein GAR1, putative	TcCLB.510687.120	-1.7359
	cyclophilin, putative	TcCLB.510947.50	-2.53848
	fibrillarin, putative	TcCLB.511287.150	-1.68341
	ribosome biogenesis protein, putative	TcCLB.511287.90	-1.65519
