# Supplementary material for: Comparative high-throughput analysis of the Trypanosoma cruzi response to organometallic compounds
Source: Royal Society of Chemistry journal article supplement (doi:10.1039/d0mt00030b), 2020-03-24
Supplement: d0mt00030b5.xlsx [file d0mt00030b5.xlsx]

## Sheet: 60 Common upregulated genes
60 common elements in diferentially expressed genes between Pd-dppf-mpo and Pt-dppf-mpo
Gene ID	Description
TcCLB.506009.10	hypothetical protein, conserved
TcCLB.510223.9	hypothetical protein, conserved
TcCLB.506241.80	hypothetical protein, conserved
TcCLB.510305.70	hypothetical protein, conserved
TcCLB.510581.20	receptor-type adenylate cyclase, putative
TcCLB.511653.20	dual-specificity protein phosphatase, putative
TcCLB.508065.70	protein associated with differentiation 8, putative
TcCLB.507515.100	hypothetical protein, conserved
TcCLB.508231.190	ATP-binding cassette protein subfamily G
TcCLB.506479.120	cytidine triphosphate synthase, putative
TcCLB.503583.100	hypothetical protein, conserved
TcCLB.506559.190	kinatase, putative
TcCLB.508669.10	hypothetical protein, conserved
TcCLB.511825.240	hypothetical protein, conserved
TcCLB.508857.30	trans-sialidase, Group I, putative
TcCLB.508859.118	trans-sialidase, putative
TcCLB.511671.130	hypothetical protein, conserved
TcCLB.504021.20	hypothetical protein, conserved
TcCLB.511291.50	hypothetical protein, conserved
TcCLB.511635.80	hypothetical protein, conserved
TcCLB.506791.10	CYC2-like cyclin 4, putative
TcCLB.506275.121	hypothetical protein
TcCLB.509161.10	ubiquitin-conjugating enzyme E2, putative
TcCLB.503559.70	cystinosin, putative
TcCLB.504021.10	G1 cyclin CycE4, putative
TcCLB.507073.20	hypothetical protein, conserved
TcCLB.510575.210	hypothetical protein, conserved
TcCLB.511465.20	hypothetical protein, conserved
TcCLB.506721.30	calpain-like cysteine peptidase, putative
TcCLB.509287.80	trans-sialidase, Group VII, putative
TcCLB.507063.70	trans-sialidase, Group II, putative
TcCLB.510333.10	hypothetical protein, conserved
TcCLB.506679.80	SNF1-related protein kinases, putative
TcCLB.508797.10	tubulin-tyrosine ligase-like protein, putative
TcCLB.508859.90	phosphatidylinositol 3-kinase 2, putative
TcCLB.503583.80	dual specificity protein phosphatase or MAP kinase phosphatase, putative
TcCLB.508409.160	thymine-7-hydroxylase, putative
TcCLB.510359.290	hypothetical protein, conserved
TcCLB.510729.140	NIMA-related kinase, putative
TcCLB.506477.60	protein kinase, putative
TcCLB.508461.310	protein kinase A catalytic subunit isoform 1, putative
TcCLB.510335.10	hypothetical protein, conserved
TcCLB.511821.179	hypothetical protein, conserved
TcCLB.505183.130	sugar transporter, putative
TcCLB.503411.30	hypothetical protein, conserved
TcCLB.511821.20	hypothetical protein, conserved
TcCLB.509857.40	hypothetical protein, conserved
TcCLB.511907.89	hypothetical protein, conserved
TcCLB.508175.200	hypothetical protein, conserved
TcCLB.511511.150	sphingosine 1-phosphate lyase, putative
TcCLB.511809.90	hypothetical protein, conserved
TcCLB.508153.440	poly(A) polymerase, putative
TcCLB.504109.30	hypothetical protein, conserved
TcCLB.508119.200	hypothetical protein
TcCLB.508543.180	hypothetical protein, conserved
TcCLB.509713.30	hypothetical protein, conserved
TcCLB.511367.240	PIWI-like protein
TcCLB.506327.40	hypothetical protein, conserved
TcCLB.511317.50	hypothetical protein, conserved
TcCLB.508303.40	hypothetical protein, conserved

## Sheet: 1016 Pd-dppf-mpo up
1016 elements included exclusively in diferentially expressed genes in Pd-dppf-mpo
Gene ID	Description
TcCLB.507063.60	hypothetical protein, conserved
TcCLB.510217.10	hypothetical protein
TcCLB.508965.70	hypothetical protein, conserved
TcCLB.509547.10	hypothetical protein
TcCLB.508701.20	cation transporter, putative
TcCLB.509755.89	hypothetical protein
TcCLB.509105.120	protein kinase, putative
TcCLB.511283.120	hypothetical protein, conserved
TcCLB.510007.20	hypothetical protein, conserved
TcCLB.508873.410	hypothetical protein, conserved
TcCLB.472833.10	hypothetical protein, conserved
TcCLB.511263.40	hypothetical protein, conserved
TcCLB.511247.9	hypothetical protein, conserved
TcCLB.506319.40	hypothetical protein
TcCLB.509937.130	protein kinase, putative
TcCLB.511649.100	amino acid permease, putative
TcCLB.511277.200	RNA-binding protein, putative
TcCLB.506475.90	hypothetical protein, conserved
TcCLB.505193.60	hypothetical protein, conserved
TcCLB.504173.40	hypothetical protein
TcCLB.511261.120	pumilio/PUF RNA binding protein 2, putative
TcCLB.506247.190	nuclear lim interactor-interacting factor, putative
TcCLB.511481.70	RNA-binding protein 5, putative
TcCLB.511857.10	hypothetical protein, conserved
TcCLB.509163.50	hypothetical protein
TcCLB.511857.50	actin-like protein, putative
TcCLB.506297.350	SKP1-like protein
TcCLB.507019.130	hypothetical protein
TcCLB.508815.10	hypothetical protein, conserved
TcCLB.506577.5	hypothetical protein
TcCLB.510045.20	ABC transporter, putative
TcCLB.506435.50	hypothetical protein, conserved
TcCLB.504105.100	hypothetical protein
TcCLB.509573.10	small GTP-binding protein Rab7, putative
TcCLB.511755.80	formin, putative
TcCLB.511277.140	serine/threonine protein kinase, putative
TcCLB.503781.30	hypothetical protein, conserved
TcCLB.503733.30	hypothetical protein, conserved
TcCLB.511459.20	hypothetical protein, conserved
TcCLB.506479.10	hypothetical protein, conserved
TcCLB.506537.240	hypothetical protein, conserved
TcCLB.508409.310	hypothetical protein, conserved
TcCLB.509229.20	hypothetical protein, conserved
TcCLB.508889.19	hypothetical protein
TcCLB.511887.50	hypothetical protein, conserved
TcCLB.504161.30	hypothetical protein, conserved
TcCLB.511165.100	serine/threonine protein kinase, putative
TcCLB.510219.10	hypothetical protein, conserved
TcCLB.510007.50	hypothetical protein, conserved
TcCLB.503987.70	ribosome biogenesis protein TSR3, putative
TcCLB.506793.50	hypothetical protein, conserved
TcCLB.509637.27	hypothetical protein, conserved
TcCLB.507087.14	hypothetical protein, conserved
TcCLB.503411.4	hypothetical protein, conserved
TcCLB.507087.30	Peptidase C19, ubiquitin carboxyl-terminal hydrolase, putative
TcCLB.511151.54	surface protease GP63, putative
TcCLB.507317.60	protein kinase-like protein, putative
TcCLB.506977.10	dual specificity protein phosphatase, putative
TcCLB.508817.110	hypothetical protein, conserved
TcCLB.504023.10	hypothetical protein, conserved
TcCLB.510889.290	hypothetical protein
TcCLB.503939.60	hypothetical protein, conserved
TcCLB.510887.30	hypothetical protein, conserved
TcCLB.503923.40	hypothetical protein, conserved
TcCLB.508645.40	nucleoside transporter 1, putative
TcCLB.507705.10	hypothetical protein, conserved
TcCLB.511159.14	hypothetical protein, conserved
TcCLB.510575.239	hypothetical protein, conserved
TcCLB.509799.120	hypothetical protein, conserved
TcCLB.511905.9	hypothetical protein, conserved
TcCLB.507949.250	hypothetical protein, conserved
TcCLB.504069.34	hypothetical protein, conserved
TcCLB.504173.60	hypothetical protein, conserved
TcCLB.507793.60	hypothetical protein, conserved
TcCLB.508909.150	hypothetical protein, conserved
TcCLB.511759.40	hypothetical protein, conserved
TcCLB.506679.10	hypothetical protein, conserved
TcCLB.508257.210	hypothetical protein, conserved
TcCLB.507063.10	hypothetical protein
TcCLB.506883.90	hypothetical protein, conserved
TcCLB.511291.40	protein kinase, putative
TcCLB.510661.190	protein kinase, putative
TcCLB.508659.30	hypothetical protein, conserved
TcCLB.508441.30	protein kinase, putative
TcCLB.509681.10	hypothetical protein, conserved
TcCLB.511755.100	hypothetical protein, conserved
TcCLB.508909.330	protein kinase, putative
TcCLB.509991.80	hypothetical protein, conserved
TcCLB.506619.30	Flagellar Member 8
TcCLB.503679.30	hypothetical protein, conserved
TcCLB.509721.20	hypothetical protein, conserved
TcCLB.458241.10	hypothetical protein, conserved
TcCLB.508153.740	hypothetical protein
TcCLB.511909.50	hypothetical protein, conserved
TcCLB.510221.20	hypothetical protein, conserved
TcCLB.507519.180	hypothetical protein, conserved
TcCLB.506425.80	phosphatidylinositol kinase, putative
TcCLB.506871.120	hypothetical protein, conserved
TcCLB.510835.10	hypothetical protein, conserved
TcCLB.511269.50	protein kinase A catalytic subunit 3
TcCLB.511277.554	hypothetical protein, conserved
TcCLB.508365.80	hypothetical protein
TcCLB.511257.30	ras-related protein rab, putative
TcCLB.503939.50	hypothetical protein, conserved
TcCLB.507031.179	hypothetical protein, conserved
TcCLB.509525.40	hypothetical protein, conserved
TcCLB.508141.70	Kinesin-13 4, putative
TcCLB.509717.60	metallo-peptidase, Clan MA(E) Family M41
TcCLB.503723.20	hypothetical protein, conserved
TcCLB.511283.130	MEKK-related kinase 1, putative
TcCLB.509791.100	hypothetical protein, conserved
TcCLB.509243.20	hypothetical protein, conserved
TcCLB.511461.30	hypothetical protein, conserved
TcCLB.506855.300	hypothetical protein, conserved
TcCLB.510577.30	hypothetical protein
TcCLB.503431.90	hypothetical protein, conserved
TcCLB.506475.110	hypothetical protein
TcCLB.507857.4	transcription elongation factor, putative
TcCLB.509237.90	hypothetical protein, conserved
TcCLB.507823.39	hypothetical protein, conserved
TcCLB.508693.190	hypothetical protein, conserved
TcCLB.510425.28	hypothetical protein, conserved
TcCLB.508817.170	hypothetical protein, conserved
TcCLB.508351.30	hypothetical protein, conserved
TcCLB.511649.30	hypothetical protein, conserved
TcCLB.509207.80	glycogen synthase kinase-3 alpha, putative
TcCLB.503635.89	hypothetical protein, conserved
TcCLB.508919.110	hypothetical protein, conserved
TcCLB.503415.30	hypothetical protein, conserved
TcCLB.509799.20	hypothetical protein, conserved
TcCLB.506151.10	hypothetical protein, conserved
TcCLB.511295.20	hypothetical protein, conserved
TcCLB.507517.20	DNA polymerase sigma-like protein, putative
TcCLB.508641.100	hypothetical protein, conserved
TcCLB.506009.20	hypothetical protein, conserved
TcCLB.503415.40	hypothetical protein
TcCLB.506319.70	hypothetical protein
TcCLB.507723.120	U1A small nuclear ribonucleoprotein, putative
TcCLB.451263.9	hypothetical protein, conserved
TcCLB.510689.80	hypothetical protein, conserved
TcCLB.504123.20	hypothetical protein, conserved
TcCLB.503635.10	protein kinase, putative
TcCLB.508851.160	hypothetical protein, conserved
TcCLB.509001.30	hypothetical protein, conserved
TcCLB.506583.50	hypothetical protein, conserved
TcCLB.503693.29	hypothetical protein
TcCLB.509017.50	hypothetical protein, conserved
TcCLB.509637.18	hypothetical protein, conserved
TcCLB.511907.30	cytoskeleton associated protein, putative
TcCLB.511483.10	hypothetical protein
TcCLB.503411.10	hypothetical protein
TcCLB.511667.10	hypothetical protein, conserved
TcCLB.511283.240	hypothetical protein, conserved
TcCLB.506475.100	conserved protein, unknown function
TcCLB.511661.20	hypothetical protein, conserved
TcCLB.506999.180	hypothetical protein
TcCLB.508909.160	hypothetical protein, conserved
TcCLB.507063.170	hypothetical protein
TcCLB.511909.60	hypothetical protein, conserved
TcCLB.508153.160	hypothetical protein, conserved
TcCLB.509569.40	hypothetical protein, conserved
TcCLB.507063.290	hypothetical protein
TcCLB.510363.90	hypothetical protein
TcCLB.511491.40	hypothetical protein, conserved
TcCLB.507787.40	hypothetical protein, conserved
TcCLB.508445.90	hypothetical protein, conserved
TcCLB.508919.94	hypothetical protein, conserved
TcCLB.506443.20	hypothetical protein, conserved
TcCLB.507645.30	hypothetical protein, conserved
TcCLB.506315.40	hypothetical protein, conserved
TcCLB.508865.4	protein phosphatase 2C, putative
TcCLB.511261.80	hypothetical protein, conserved
TcCLB.509509.30	6-phosphofructo-2-kinase/fructose-2,6-biphosphatase, putative
TcCLB.506587.44	hypothetical protein
TcCLB.508637.160	dual specificity protein phosphatase, putative
TcCLB.510657.20	ubiquitin hydrolase, putative
TcCLB.511629.20	hypothetical protein, conserved
TcCLB.503917.7	RNA-binding protein, putative
TcCLB.508637.40	hypothetical protein, conserved
TcCLB.511857.20	hypothetical protein, conserved
TcCLB.511517.160	hypothetical protein, conserved
TcCLB.504223.10	amino acid permease, putative
TcCLB.504839.60	hypothetical protein, conserved
TcCLB.511821.80	hypothetical protein, conserved
TcCLB.506975.49	f-actin capping protein beta subunit, putative
TcCLB.508153.680	RNA-binding protein 6, putative
TcCLB.511629.10	hypothetical protein, conserved
TcCLB.511517.30	hypothetical protein, conserved
TcCLB.508645.20	hypothetical protein
TcCLB.510359.190	hypothetical protein, conserved
TcCLB.508819.30	hypothetical protein, conserved
TcCLB.503413.19	hypothetical protein
TcCLB.506247.420	hypothetical protein, conserved
TcCLB.511295.10	FKBP-type peptidylprolyl cis-trans isomerase, putative
TcCLB.508461.280	protein kinase A catalytic subunit isoform 2, putative
TcCLB.505183.160	hypothetical protein, conserved
TcCLB.506871.190	hypothetical protein
TcCLB.511817.210	protein kinase, putative
TcCLB.506681.40	hypothetical protein, conserved
TcCLB.508153.1000	hypothetical protein, conserved
TcCLB.508741.110	hypothetical protein, conserved
TcCLB.509561.50	hypothetical protein, conserved
TcCLB.508153.970	AGC/RSK family serine/threonine kinase, putative
TcCLB.507623.20	hypothetical protein, conserved
TcCLB.510303.200	glucosamine-fructose-6-phosphate aminotransferase, putative
TcCLB.511661.70	hypothetical protein, conserved
TcCLB.511903.90	hypothetical protein, conserved
TcCLB.510421.180	casein kinase I, putative
TcCLB.507775.10	hypothetical protein, conserved
TcCLB.506793.90	hypothetical protein, conserved
TcCLB.507889.20	hypothetical protein, conserved
TcCLB.509029.40	hypothetical protein, conserved
TcCLB.504251.20	hypothetical protein, conserved
TcCLB.510577.10	hypothetical protein, conserved
TcCLB.508301.10	hypothetical protein, conserved
TcCLB.510329.380	hypothetical protein, conserved
TcCLB.507031.110	hypothetical protein, conserved
TcCLB.507491.119	hypothetical protein, conserved
TcCLB.511385.110	hypothetical protein
TcCLB.503703.100	hypothetical protein, conserved
TcCLB.508645.70	nucleoside transporter 1, putative
TcCLB.504827.130	eukaryotic translation initiation factor 4 gamma 4
TcCLB.511267.20	hypothetical protein, conserved
TcCLB.508737.80	mannosyltransferase-like protein, putative
TcCLB.508897.119	FKBP-type peptidylprolyl cis-trans isomerase, putative
TcCLB.511233.90	hypothetical protein, conserved
TcCLB.503679.20	hypothetical protein, conserved
TcCLB.508945.10	hypothetical protein, conserved
TcCLB.506559.434	hypothetical protein, conserved
TcCLB.510889.251	Present in the outer mitochondrial membrane proteome 18
TcCLB.506559.500	hypothetical protein, conserved
TcCLB.510329.320	hypothetical protein, conserved
TcCLB.504253.20	hypothetical protein, conserved
TcCLB.511649.60	COP9 signalosome complex subunit 5, putative
TcCLB.507501.30	hypothetical protein, conserved
TcCLB.508257.30	hypothetical protein, conserved
TcCLB.503703.10	hypothetical protein, conserved
TcCLB.503999.100	phospholipid-transporting ATPase 1-like protein, putative
TcCLB.511299.60	hypothetical protein, conserved
TcCLB.511367.180	hypothetical protein
TcCLB.504021.74	hypothetical protein, conserved
TcCLB.507951.250	tRNA isopentenyltransferase, putative
TcCLB.511249.100	hypothetical protein, conserved
TcCLB.509647.110	hypothetical protein, conserved
TcCLB.507159.41	hypothetical protein, conserved
TcCLB.509025.20	hypothetical protein, conserved
TcCLB.506819.49	hypothetical protein, conserved
TcCLB.507947.10	conserved protein, unknown function
TcCLB.509161.130	ATP- dependent RNA helicase, putative
TcCLB.509331.90	5'-AMP-activated protein kinase subunit beta, putative
TcCLB.511821.170	hypothetical protein, conserved
TcCLB.506585.100	hypothetical protein
TcCLB.508873.20	hypothetical protein
TcCLB.510661.240	hypothetical protein, conserved
TcCLB.504069.110	hypothetical protein, conserved
TcCLB.510889.210	hypothetical protein, conserved
TcCLB.509023.160	hypothetical protein, conserved
TcCLB.508263.30	kinesin, putative
TcCLB.507049.66	hypothetical protein
TcCLB.506915.10	hypothetical protein, conserved
TcCLB.509733.190	hypothetical protein, conserved
TcCLB.509647.80	hypothetical protein, conserved
TcCLB.507515.90	hypothetical protein, conserved
TcCLB.509715.130	hypothetical protein, conserved
TcCLB.510735.40	hypothetical protein, conserved
TcCLB.511245.240	serine/threonine protein kinase, putative
TcCLB.511017.25	hypothetical protein
TcCLB.506201.80	serine/threonine-protein phosphatase PP1, putative
TcCLB.511823.14	hypothetical protein, conserved
TcCLB.503703.30	hypothetical protein, conserved
TcCLB.510827.10	hypothetical protein, conserved
TcCLB.503973.110	hypothetical protein
TcCLB.504123.40	hypothetical protein, conserved
TcCLB.503919.20	hypothetical protein, conserved
TcCLB.510219.20	hypothetical protein, conserved
TcCLB.509571.60	hypothetical protein, conserved
TcCLB.468005.9	pumilio/PUF RNA binding protein 3, putative
TcCLB.508879.160	hypothetical protein, conserved
TcCLB.509695.50	katanin, putative
TcCLB.511163.50	hypothetical protein, conserved
TcCLB.507073.49	hypothetical protein, conserved
TcCLB.504253.40	hypothetical protein, conserved
TcCLB.510735.90	Flagellum attachment zone protein 4
TcCLB.509215.19	hypothetical protein, conserved
TcCLB.506537.120	hypothetical protein, conserved
TcCLB.510155.160	protein kinase, putative
TcCLB.506721.50	hypothetical protein
TcCLB.511511.6	zinc finger protein ZFP1
TcCLB.506855.130	hypothetical protein, conserved
TcCLB.511649.169	ATP-dependent DEAD/H RNA helicase, putative
TcCLB.509429.260	hypothetical protein, conserved
TcCLB.508741.280	ubiquitin-conjugating enzyme E2, putative
TcCLB.506445.20	Eukaryotic translation initiation factor 4 gamma 2
TcCLB.505193.40	SUMO1/Ulp2, putative
TcCLB.510007.30	RNA-binding protein, putative
TcCLB.511859.80	hypothetical protein
TcCLB.507681.40	hypothetical protein
TcCLB.511245.170	hypothetical protein, conserved
TcCLB.510245.10	amino acid permease, putative
TcCLB.508577.150	hypothetical protein, conserved
TcCLB.508625.50	6-phosphofructo-2-kinase/fructose-2,6-bisphosphatas, putative
TcCLB.507053.90	conserved protein, unknown function
TcCLB.503563.20	ADG2, putative
TcCLB.511169.29	tubulin-tyrsoine ligase-like protein, putative
TcCLB.509331.150	permease-like protein, putative
TcCLB.508957.30	hypothetical protein, conserved
TcCLB.503729.10	hypothetical protein, conserved
TcCLB.506509.20	hypothetical protein, conserved
TcCLB.509671.160	DNA polymerase epsilon subunit B, putative
TcCLB.506991.10	hypothetical protein, conserved
TcCLB.507583.60	hypothetical protein, conserved
TcCLB.509053.120	hypothetical protein, conserved
TcCLB.507073.30	hypothetical protein, conserved
TcCLB.510663.40	hypothetical protein, conserved
TcCLB.510575.20	hypothetical protein, conserved
TcCLB.510729.60	hypothetical protein, conserved
TcCLB.511657.10	protein kinase, putative
TcCLB.506177.150	hypothetical protein, conserved
TcCLB.508815.30	DNA repair protein, putative
TcCLB.506871.110	hypothetical protein, conserved
TcCLB.508693.20	DNA topoisomerase IB, large subunit
TcCLB.415803.10	hypothetical protein, conserved
TcCLB.504185.20	hypothetical protein, conserved
TcCLB.511277.610	surface protease GP63, putative
TcCLB.506327.80	serine/threonine protein kinase, putative
TcCLB.510889.100	hypothetical protein, conserved
TcCLB.506577.170	hypothetical protein, conserved
TcCLB.508153.420	hypothetical protein, conserved
TcCLB.511289.50	mitogen-activated protein kinase 9, putative
TcCLB.506297.230	hypothetical protein, conserved
TcCLB.510099.30	hypothetical protein, conserved
TcCLB.506559.524	protein phosphatase 2C, putative
TcCLB.510187.390	Protein kinase domain, putative
TcCLB.504253.50	hypothetical protein, conserved
TcCLB.509985.30	hypothetical protein, conserved
TcCLB.510265.80	hypothetical protein, conserved
TcCLB.511807.160	hypothetical protein, conserved
TcCLB.503923.10	hypothetical protein, conserved
TcCLB.506789.270	hypothetical protein, conserved
TcCLB.507085.140	mucin TcMUCII, putative
TcCLB.509647.50	hypothetical protein, conserved
TcCLB.508257.240	hypothetical protein, conserved
TcCLB.510337.20	calpain-like cysteine peptidase, putative
TcCLB.506435.10	hypothetical protein, conserved
TcCLB.511287.100	hypothetical protein, conserved
TcCLB.506149.10	folate/pteridine transporter, putative
TcCLB.510689.60	Double RNA binding domain protein 7
TcCLB.505193.20	hypothetical protein, conserved
TcCLB.506855.150	hypothetical protein, conserved
TcCLB.509999.120	RNA-binding protein, putative
TcCLB.508625.160	pumilio/PUF RNA binding protein 1, putative
TcCLB.508411.80	hypothetical protein, conserved
TcCLB.509937.220	protein kinase, putative
TcCLB.504827.70	hypothetical protein, conserved
TcCLB.511025.80	hypothetical protein, conserved
TcCLB.511909.30	hypothetical protein, conserved
TcCLB.504069.100	RNA polymerase II, putative
TcCLB.503461.20	per-hexamer repeat protein 5, putative
TcCLB.509937.160	hypothetical protein, conserved
TcCLB.509791.140	hypothetical protein, conserved
TcCLB.509741.34	hypothetical protein, conserved
TcCLB.510519.14	hypothetical protein, conserved
TcCLB.508479.224	hypothetical protein, conserved
TcCLB.506041.20	hypothetical protein, conserved
TcCLB.506303.120	hypothetical protein, conserved
TcCLB.507743.9	tyrosine protein kinase, putative
TcCLB.506821.130	hypothetical protein, conserved
TcCLB.503773.20	hypothetical protein, conserved
TcCLB.509563.10	hypothetical protein, conserved
TcCLB.506873.20	hypothetical protein, conserved
TcCLB.506883.100	GTP-binding protein, putative
TcCLB.506303.30	hypothetical protein, conserved
TcCLB.507025.60	RNA-binding protein, putative
TcCLB.508891.30	hypothetical protein, conserved
TcCLB.508411.50	hypothetical protein, conserved
TcCLB.508065.50	phosphatidylinositol-4-phosphate 5-kinase-like protein, putative
TcCLB.511825.250	hypothetical protein, conserved
TcCLB.508355.280	hypothetical protein, conserved
TcCLB.510187.520	hypothetical protein, conserved
TcCLB.510155.115	hypothetical protein, conserved
TcCLB.507069.60	mucin TcMUCII, putative
TcCLB.503617.10	protein kinase, putative
TcCLB.508507.20	hypothetical protein, conserved
TcCLB.506475.105	hypothetical protein, conserved
TcCLB.503825.19	protein kinase, putative
TcCLB.507539.49	hypothetical protein, conserved
TcCLB.509617.40	hypothetical protein, conserved
TcCLB.508689.10	hypothetical protein, conserved
TcCLB.504105.250	hypothetical protein
TcCLB.506459.280	hypothetical protein, conserved
TcCLB.511821.60	protein kinase, putative
TcCLB.506821.160	hypothetical protein, conserved
TcCLB.511819.50	hypothetical protein, conserved
TcCLB.509911.20	hypothetical protein
TcCLB.506275.60	metallo-peptidase, Clan MC, Family M14, putative
TcCLB.511511.5	hypothetical protein
TcCLB.449759.9	hypothetical protein, conserved
TcCLB.510329.220	hypothetical protein, conserved
TcCLB.504131.80	hypothetical protein, conserved
TcCLB.508641.170	protein kinase, putative
TcCLB.511239.10	hypothetical protein, conserved
TcCLB.508027.80	hypothetical protein, conserved
TcCLB.511261.90	hypothetical protein, conserved
TcCLB.508639.10	trans-sialidase, putative
TcCLB.507851.70	hypothetical protein
TcCLB.510187.470	hypothetical protein
TcCLB.510943.206	trans-sialidase, putative
TcCLB.508879.200	hypothetical protein, conserved
TcCLB.506327.50	hypothetical protein, conserved
TcCLB.506991.19	hypothetical protein, conserved
TcCLB.508823.100	hypothetical protein, conserved
TcCLB.508059.24	hypothetical protein, conserved
TcCLB.508267.50	hypothetical protein, conserved
TcCLB.504161.59	transporter, putative
TcCLB.509571.70	hypothetical protein, conserved
TcCLB.508613.10	hypothetical protein, conserved
TcCLB.510889.190	hypothetical protein, conserved
TcCLB.510331.10	trans-sialidase, Group III, putative
TcCLB.507519.170	hypothetical protein, conserved
TcCLB.507765.140	hypothetical protein, conserved
TcCLB.510629.420	protein phosphatase 1, regulatory subunit, putative
TcCLB.511823.30	hypothetical protein, conserved
TcCLB.507949.20	RWD domain-containing protein
TcCLB.509207.120	hypothetical protein, conserved
TcCLB.510099.50	hypothetical protein, conserved
TcCLB.509229.70	hypothetical protein, conserved
TcCLB.508153.150	hypothetical protein, conserved
TcCLB.506871.70	hypothetical protein, conserved
TcCLB.511863.30	Flagellum attachment zone protein 13
TcCLB.506009.30	TPR-repeat-containing chaperone protein DNAJ, putative
TcCLB.504741.60	transcription initiation protein, putative
TcCLB.508501.310	hypothetical protein, conserved
TcCLB.503399.10	hypothetical protein, conserved
TcCLB.507763.20	hypothetical protein
TcCLB.507207.10	hypothetical protein, conserved
TcCLB.511907.240	protein kinase, putative
TcCLB.506575.70	Present in the outer mitochondrial membrane proteome 41
TcCLB.467287.10	alpha-tubulin N-acetyltransferase, putative
TcCLB.511649.160	hypothetical protein, conserved
TcCLB.511661.120	protein kinase, putative
TcCLB.509643.100	hypothetical protein, conserved
TcCLB.509877.50	glycosomal membrane protein, putative
TcCLB.437575.18	transporter, putative
TcCLB.508199.30	hypothetical protein, conserved
TcCLB.511817.250	F-box and WD40 domain containing protein
TcCLB.506793.60	hypothetical protein, conserved
TcCLB.507029.10	hypothetical protein, conserved
TcCLB.511821.160	microtubial binding protein, putative
TcCLB.506477.20	vesicular-fusion protein nsf, putative
TcCLB.507515.120	sphingosine kinase A, B, putative
TcCLB.504069.40	hypothetical protein, conserved
TcCLB.507491.90	protein kinase, putative
TcCLB.508821.30	hypothetical protein
TcCLB.511825.190	hypothetical protein, conserved
TcCLB.504105.160	splicing factor ptsr1 interacting protein, putative
TcCLB.508479.140	hypothetical protein, conserved
TcCLB.506789.170	ATPase, putative
TcCLB.506229.64	conserved protein, unknown function
TcCLB.506175.50	hypothetical protein, conserved
TcCLB.509001.20	hypothetical protein, conserved
TcCLB.508707.130	hypothetical protein, conserved
TcCLB.506585.50	hypothetical protein, conserved
TcCLB.509901.140	COP9 signalosome complex subunit 5, putative
TcCLB.508699.60	hypothetical protein, conserved
TcCLB.510687.90	hypothetical protein, conserved
TcCLB.508139.130	trans-sialidase, Group II, putative
TcCLB.506315.60	hypothetical protein, conserved
TcCLB.511263.50	hypothetical protein, conserved
TcCLB.505193.10	serine/threonine protein phosphatase-like protein, putative
TcCLB.506201.4	hypothetical protein, conserved
TcCLB.508667.40	hypothetical protein, conserved
TcCLB.479883.10	hypothetical protein, conserved
TcCLB.503999.20	Kinesin-13 5, putative
TcCLB.506139.40	Mucin-associated surface protein (MASP), subgroup S024
TcCLB.508409.300	hypothetical protein, conserved
TcCLB.509937.200	hypothetical protein, conserved
TcCLB.510889.200	hypothetical protein, conserved
TcCLB.511233.59	hypothetical protein, conserved
TcCLB.511277.115	hypothetical protein, conserved
TcCLB.507541.10	hypothetical protein, conserved
TcCLB.509561.30	citrate transporter, putative
TcCLB.509287.230	trans-sialidase, Group II, putative
TcCLB.509161.120	hypothetical protein, conserved
TcCLB.507663.20	hypothetical protein, conserved
TcCLB.510729.230	hypothetical protein, conserved
TcCLB.506041.60	hypothetical protein, conserved
TcCLB.511267.24	hypothetical protein, conserved
TcCLB.508153.1030	hypothetical protein, conserved
TcCLB.508593.130	hypothetical protein, conserved
TcCLB.511649.39	hypothetical protein, conserved
TcCLB.506581.20	hypothetical protein, conserved
TcCLB.511725.40	hypothetical protein, conserved
TcCLB.503939.30	ttaggg binding factor, putative
TcCLB.511725.230	protein kinase, putative
TcCLB.509663.44	hypothetical protein, conserved
TcCLB.506009.100	ADP-ribosylation factor-like protein, putative
TcCLB.511511.40	hypothetical protein, conserved
TcCLB.503847.60	hypothetical protein, conserved
TcCLB.509229.60	hypothetical protein, conserved
TcCLB.510663.64	mitochondrial carrier protein, putative
TcCLB.509179.130	hypothetical protein, conserved
TcCLB.506559.530	protein phosphatase 2C, putative
TcCLB.506855.320	hypothetical protein, conserved
TcCLB.511517.130	hypothetical protein, conserved
TcCLB.508231.130	Cell division control protein 48, putative
TcCLB.508613.50	hypothetical protein, conserved
TcCLB.507019.100	nuclear movement protein, putative
TcCLB.509459.40	hypothetical protein, conserved
TcCLB.510729.299	protein kinase, putative
TcCLB.510187.490	hypothetical protein, conserved
TcCLB.504741.30	protein phosphatase 2C, putative
TcCLB.508735.100	hypothetical protein, conserved
TcCLB.509683.80	adenylosuccinate synthetase, putative
TcCLB.508693.199	hypothetical protein, conserved
TcCLB.508027.120	hypothetical protein, conserved
TcCLB.503465.40	hypothetical protein
TcCLB.508871.160	hypothetical protein
TcCLB.510901.230	hypothetical protein, conserved
TcCLB.508855.10	trans-sialidase, putative
TcCLB.511323.60	hypothetical protein, conserved
TcCLB.506297.250	palmitoyl acyltransferase 7, putative
TcCLB.508931.10	hypothetical protein
TcCLB.511163.24	hypothetical protein, conserved
TcCLB.509791.90	hypothetical protein, conserved
TcCLB.508045.20	hypothetical protein, conserved
TcCLB.505037.50	small GTP-binding protein RAB6, putative
TcCLB.506201.70	serine/threonine-protein phosphatase PP1 alpha
TcCLB.506559.517	hypothetical protein, conserved
TcCLB.503581.30	hypothetical protein, conserved
TcCLB.511245.40	hypothetical protein
TcCLB.506123.30	protein kinase, putative
TcCLB.507765.20	PUF nine target 1
TcCLB.511263.30	hypothetical protein, conserved
TcCLB.509611.70	hypothetical protein, conserved
TcCLB.508917.30	kinesin, putative
TcCLB.505939.65	hypothetical protein, conserved
TcCLB.510657.110	hypothetical protein, conserved
TcCLB.508027.40	folate/pteridine transporter, putative
TcCLB.506319.20	hypothetical protein, conserved
TcCLB.508593.100	hypothetical protein, conserved
TcCLB.510731.40	katanin, putative
TcCLB.511727.230	Repressor of differentiation kinase 1, putative
TcCLB.508601.40	hypothetical protein, conserved
TcCLB.509569.50	guanine nucleotide exchange factor subunit GCD7
TcCLB.508669.30	hypothetical protein
TcCLB.508897.90	hypothetical protein, conserved
TcCLB.508461.120	hypothetical protein, conserved
TcCLB.511385.90	hypothetical protein, conserved
TcCLB.511629.40	hypothetical protein, conserved
TcCLB.510359.40	hypothetical protein, conserved
TcCLB.508043.20	metallo-beta-lactamase-like protein, putative
TcCLB.509211.10	hypothetical protein, conserved
TcCLB.508961.40	hypothetical protein, conserved
TcCLB.506247.310	hypothetical protein, conserved
TcCLB.506851.10	NIMA-related kinase, putative
TcCLB.506301.20	Golgi reassembly stacking protein (GRASP homologue), putative
TcCLB.508119.190	hypothetical protein, conserved
TcCLB.509429.250	ubiquitin hydrolase, putative
TcCLB.508153.80	DNA replication complex GINS protein SLD5, putative
TcCLB.506145.10	hypothetical protein, conserved
TcCLB.511281.50	surface protease GP63, putative
TcCLB.507915.10	hypothetical protein, conserved
TcCLB.503999.40	Spindle assembly abnormal 4
TcCLB.509051.50	hypothetical protein, conserved
TcCLB.506999.120	hypothetical protein, conserved
TcCLB.506793.100	hypothetical protein, conserved
TcCLB.509229.40	hypothetical protein, conserved
TcCLB.511657.20	protein kinase, putative
TcCLB.508965.39	hypothetical protein, conserved
TcCLB.510421.310	hypothetical protein, conserved
TcCLB.510421.29	CAAX prenyl protease 2, putative
TcCLB.505171.40	hypothetical protein, conserved
TcCLB.507539.40	cell cycle sequence binding phosphoprotein (RBP33), putative
TcCLB.509253.20	tubulin tyrosine ligase, putative
TcCLB.511817.80	protein kinase, putative
TcCLB.509799.40	hypothetical protein, conserved
TcCLB.508267.30	hypothetical protein, conserved
TcCLB.506957.140	phosphatidylinositol-4-phosphate 5-kinase-like, putative
TcCLB.507895.160	hypothetical protein, conserved
TcCLB.508495.50	mucin TcMUCII, putative
TcCLB.509399.140	hypothetical protein, conserved
TcCLB.509319.100	hypothetical protein, conserved
TcCLB.504105.180	hypothetical protein, conserved
TcCLB.509663.37	hypothetical protein, conserved
TcCLB.510519.80	hypothetical protein, conserved
TcCLB.510735.100	hypothetical protein, conserved
TcCLB.503791.20	hypothetical protein, conserved
TcCLB.503995.20	hypothetical protein, conserved
TcCLB.506445.10	actin-like protein, putative
TcCLB.508051.40	hypothetical protein, conserved
TcCLB.503879.90	hypothetical protein, conserved
TcCLB.507895.69	hypothetical protein, conserved
TcCLB.511245.120	hypothetical protein, conserved
TcCLB.511651.10	ATP-dependent DEAD/H RNA helicase, putative
TcCLB.506459.250	hypothetical protein, conserved
TcCLB.506137.10	surface protease GP63, putative
TcCLB.507951.60	hypothetical protein, conserved
TcCLB.507991.70	hypothetical protein, conserved
TcCLB.503917.50	hypothetical protein, conserved
TcCLB.508153.140	mitogen-activated protein kinase kinase 1
TcCLB.503539.20	Putative intraflagellar transport protein A1
TcCLB.507025.50	RNA-binding protein, putative
TcCLB.506577.130	protein phosphatase 2A regulatory subunit, putative
TcCLB.503987.50	hypothetical protein, conserved
TcCLB.506435.370	surface protease GP63, putative
TcCLB.509733.50	hypothetical protein, conserved
TcCLB.509065.79	hypothetical protein, conserved
TcCLB.510305.30	lipin, putative
TcCLB.511383.30	U1 small nuclear ribonucleoprotein, putative
TcCLB.509215.16	GlcNAc-PI synthesis protein
TcCLB.503521.10	hypothetical protein
TcCLB.507209.60	hypothetical protein, conserved
TcCLB.510945.60	hypothetical protein, conserved
TcCLB.506905.30	hypothetical protein, conserved
TcCLB.509053.10	ubiquitin-protein ligase, putative
TcCLB.511283.280	Serine/threonine-protein kinase Nek1-related, putative
TcCLB.509047.110	rac serine-threonine kinase, putative
TcCLB.508897.70	ADP-ribosylation factor family, putative
TcCLB.510901.110	hypothetical protein, conserved
TcCLB.509561.9	FLA1-binding protein
TcCLB.510223.5	translation initiation factor eIF2B delta subunit, putative
TcCLB.509799.5	hypothetical protein, conserved
TcCLB.506435.100	hypothetical protein, conserved
TcCLB.506957.120	hypothetical protein, conserved
TcCLB.510359.30	hypothetical protein, conserved
TcCLB.503823.30	hypothetical protein, conserved
TcCLB.506701.29	hypothetical protein, conserved
TcCLB.511859.200	hypothetical protein, conserved
TcCLB.508965.60	rac serine-threonine kinase, putative
TcCLB.509733.60	hypothetical protein
TcCLB.506681.70	serine-threonine dehydratase, putative
TcCLB.506559.250	hypothetical protein, conserved
TcCLB.511505.30	hypothetical protein, conserved
TcCLB.507705.20	hypothetical protein, conserved
TcCLB.506959.80	hypothetical protein, conserved
TcCLB.508503.70	hypothetical protein, conserved
TcCLB.511203.5	hypothetical protein, conserved
TcCLB.503721.20	hypothetical protein, conserved
TcCLB.507081.90	hypothetical protein, conserved
TcCLB.506275.40	hypothetical protein, conserved
TcCLB.509339.10	hypothetical protein, conserved
TcCLB.507021.50	kinesin, putative
TcCLB.506559.454	GTP-binding protein, putative
TcCLB.508657.10	hypothetical protein, conserved
TcCLB.511649.140	hypothetical protein, conserved
TcCLB.506871.160	RNA capping enzyme, cytoplasmic
TcCLB.510943.184	tyrosine phosphatase, putative
TcCLB.509875.200	copper homeostasis protein, putative
TcCLB.511287.124	peroxin 13, putative
TcCLB.509161.100	hypothetical protein, conserved
TcCLB.511657.70	hypothetical protein, conserved
TcCLB.509647.60	hypothetical protein, conserved
TcCLB.503593.30	hypothetical protein, conserved
TcCLB.507515.140	oxysterol-binding protein, putative
TcCLB.509629.10	trans-sialidase, Group III, putative
TcCLB.507017.130	hypothetical protein
TcCLB.508815.60	hypothetical protein, conserved
TcCLB.509859.20	hypothetical protein, conserved
TcCLB.511809.10	hypothetical protein
TcCLB.506295.60	hypothetical protein, conserved
TcCLB.508981.30	hypothetical protein, conserved
TcCLB.506247.370	hypothetical protein, conserved
TcCLB.511003.80	hypothetical protein, conserved
TcCLB.508461.130	elongation factor 1-alpha (ef-1-alpha), putative
TcCLB.508501.220	hypothetical protein, conserved
TcCLB.508479.320	hypothetical protein, conserved
TcCLB.503891.70	ribonuclease HII, putative
TcCLB.506175.120	hypothetical protein, conserved
TcCLB.506835.50	hypothetical protein
TcCLB.506305.29	hypothetical protein, conserved
TcCLB.508707.320	hypothetical protein, conserved
TcCLB.503823.120	hypothetical protein, conserved
TcCLB.509719.80	hypothetical protein, conserved
TcCLB.509671.172	hypothetical protein, conserved
TcCLB.463451.10	hypothetical protein, conserved
TcCLB.508859.20	hypothetical protein, conserved
TcCLB.504109.120	hypothetical protein, conserved
TcCLB.507897.30	serine/threonine-protein kinase a, putative
TcCLB.507219.9	trans-sialidase, putative
TcCLB.511817.130	hypothetical protein, conserved
TcCLB.509643.40	hypothetical protein, conserved
TcCLB.507049.41	hypothetical protein, conserved
TcCLB.508817.119	hypothetical protein, conserved
TcCLB.509507.49	mitotic cyclin, putative
TcCLB.509745.10	hypothetical protein, conserved
TcCLB.508027.90	hypothetical protein, conserved
TcCLB.476733.20	hypothetical protein, conserved
TcCLB.509317.50	dolichyl-P-Man:GDP-Man7GlcNAc2-PP-dolichyl alpha-1,6-mannosyltransferase, putative
TcCLB.503693.20	hypothetical protein, conserved
TcCLB.508919.80	hypothetical protein, conserved
TcCLB.507771.40	phosphoglycerate mutase, putative
TcCLB.509695.60	hypothetical protein, conserved
TcCLB.510225.40	hypothetical protein, conserved
TcCLB.511481.20	hypothetical protein, conserved
TcCLB.510819.20	hypothetical protein, conserved
TcCLB.467795.19	hypothetical protein, conserved
TcCLB.506789.210	paraflagellar rod protein, putative
TcCLB.511385.60	hypothetical protein
TcCLB.508693.60	hypothetical protein, conserved
TcCLB.508543.10	DNA polymerase sigma, putative
TcCLB.508695.10	hypothetical protein, conserved
TcCLB.507081.80	hypothetical protein, conserved
TcCLB.509037.20	surface protease GP63, putative
TcCLB.511725.280	hypothetical protein, conserved
TcCLB.509287.20	protein kinase, putative
TcCLB.508909.10	OSM3-like kinesin, putative
TcCLB.508175.280	hypothetical protein, conserved
TcCLB.510329.370	hypothetical protein, conserved
TcCLB.511817.60	hypothetical protein, conserved
TcCLB.504161.40	hypothetical protein, conserved
TcCLB.506011.10	hypothetical protein, conserved
TcCLB.508173.160	hypothetical protein, conserved
TcCLB.506679.210	RNA editing complex protein MP61, putative
TcCLB.506559.364	hypothetical protein, conserved
TcCLB.507053.130	hypothetical protein, conserved
TcCLB.506985.60	inositol polyphosphate kinase-like protein, putative
TcCLB.509569.150	hypothetical protein, conserved
TcCLB.509049.30	hypothetical protein, conserved
TcCLB.508961.4	ADP-ribosylation factor, putative
TcCLB.511167.110	hypothetical protein, conserved
TcCLB.508895.70	membrane protein, putative
TcCLB.511725.240	hypothetical protein, conserved
TcCLB.511817.230	hypothetical protein, conserved
TcCLB.509937.50	hypothetical protein, conserved
TcCLB.509855.10	hypothetical protein, conserved
TcCLB.509237.120	calpain-like cysteine peptidase, putative
TcCLB.506479.100	hypothetical protein, conserved
TcCLB.510969.30	hypothetical protein, conserved
TcCLB.511725.160	hypothetical protein, conserved
TcCLB.511287.80	hypothetical protein, conserved
TcCLB.509607.60	hypothetical protein
TcCLB.507951.290	hypothetical protein, conserved
TcCLB.506855.20	hypothetical protein, conserved
TcCLB.511825.90	hypothetical protein, conserved
TcCLB.511483.20	hypothetical protein, conserved
TcCLB.507491.130	hypothetical protein, conserved
TcCLB.508523.50	trans-sialidase, Group II, putative
TcCLB.509561.39	hypothetical protein, conserved
TcCLB.508533.50	hypothetical protein, conserved
TcCLB.510657.130	hypothetical protein, conserved
TcCLB.507233.110	mismatch repair protein MSH4, putative
TcCLB.511817.120	hypothetical protein, conserved
TcCLB.506305.5	hypothetical protein, conserved
TcCLB.511491.80	mitogen-activated protein kinase, putative
TcCLB.511517.90	hypothetical protein, conserved
TcCLB.467795.9	diphthamide synthesis protein, putative
TcCLB.510659.100	hypothetical protein, conserved
TcCLB.508827.110	leucine-rich repeat protein (LRRP), putative
TcCLB.511261.60	hypothetical protein, conserved
TcCLB.508059.10	hypothetical protein, conserved
TcCLB.509571.40	hypothetical protein, conserved
TcCLB.440099.28	protein kinase, putative
TcCLB.509177.40	hypothetical protein, conserved
TcCLB.507233.10	trans-sialidase, Group III, putative
TcCLB.506275.50	Golgi SNAP receptor complex member 1, putative
TcCLB.510657.80	hypothetical protein, conserved
TcCLB.506199.30	hypothetical protein, conserved
TcCLB.509937.110	hypothetical protein, conserved
TcCLB.506709.10	hypothetical protein, conserved
TcCLB.511501.40	hypothetical protein, conserved
TcCLB.504109.60	hypothetical protein, conserved
TcCLB.508059.40	syntaxin, putative
TcCLB.509229.50	hypothetical protein
TcCLB.504797.34	N-acetyltransferase, putative
TcCLB.510579.10	tyrosine phospatase-like protein, putative
TcCLB.504185.9	hypothetical protein, conserved
TcCLB.509029.80	hypothetical protein
TcCLB.511895.40	hypothetical protein
TcCLB.508303.44	hypothetical protein, conserved
TcCLB.503919.40	hypothetical protein, conserved
TcCLB.507053.190	hypothetical protein, conserved
TcCLB.510901.180	hypothetical protein, conserved
TcCLB.510661.174	riboflavin kinase, putative
TcCLB.507945.10	ATP-dependent RNA helicase, putative
TcCLB.509561.60	hypothetical protein, conserved
TcCLB.469735.9	hypothetical protein, conserved
TcCLB.507027.80	hypothetical protein, conserved
TcCLB.511717.20	hypothetical protein, conserved
TcCLB.507019.140	CDC16, putative
TcCLB.511491.90	hypothetical protein
TcCLB.510187.10	hypothetical protein, conserved
TcCLB.510729.280	trans-sialidase, Group III, putative
TcCLB.510941.20	hypothetical protein, conserved
TcCLB.504209.10	conserved protein, unknown function
TcCLB.503657.70	tyrosine phosphatase, putative
TcCLB.504177.30	hypothetical protein, conserved
TcCLB.506315.20	hypothetical protein, conserved
TcCLB.509911.74	hypothetical protein, conserved
TcCLB.509733.70	hypothetical protein, conserved
TcCLB.511723.10	surface protease GP63, putative
TcCLB.506559.110	hypothetical protein
TcCLB.508621.10	protein kinase, putative
TcCLB.506337.30	Charged multivesicular body protein 3, putative
TcCLB.507031.40	hypothetical protein, conserved
TcCLB.507005.50	hypothetical protein
TcCLB.504533.50	hypothetical protein, conserved
TcCLB.510329.120	VIT family, putative
TcCLB.508501.280	hypothetical protein, conserved
TcCLB.510901.160	hypothetical protein, conserved
TcCLB.511763.10	hypothetical protein, conserved
TcCLB.508153.1070	hypothetical protein, conserved
TcCLB.510823.30	Isoprenylcysteine alpha-carbonyl methylesterase, putative
TcCLB.508911.60	hypothetical protein, conserved
TcCLB.511277.110	citrate synthase, putative
TcCLB.506321.320	suppressive immunomodulating factor, putative
TcCLB.504131.120	hypothetical protein, conserved
TcCLB.452283.4	hypothetical protein, conserved
TcCLB.506315.80	hypothetical protein, conserved
TcCLB.510519.40	protein kinase, putative
TcCLB.511261.130	hypothetical protein, conserved
TcCLB.510445.10	casein kinase 1 isoform 2, putative
TcCLB.511261.100	chaperone DNAJ protein, putative
TcCLB.506679.200	hypothetical protein, conserved
TcCLB.510329.180	hypothetical protein, conserved
TcCLB.507991.50	kinesin, putative
TcCLB.503573.9	ATP-binding cassette transporter ABCA1, putative
TcCLB.510901.220	Flagellum attachment zone protein 20
TcCLB.511761.70	hypothetical protein, conserved
TcCLB.508015.10	hypothetical protein
TcCLB.509695.80	hypothetical protein, conserved
TcCLB.505207.10	trans-sialidase, Group VII, putative
TcCLB.504157.60	hypothetical protein, conserved
TcCLB.506559.360	hypothetical protein, conserved
TcCLB.508405.30	Suppressor of G2 allele of SKP1, putative
TcCLB.507623.120	hypothetical protein, conserved
TcCLB.509647.160	SKP1-like protein
TcCLB.511277.310	hypothetical protein, conserved
TcCLB.511277.500	hypothetical protein, conserved
TcCLB.508641.180	RNA-binding protein 38, putative
TcCLB.506559.170	8-oxoguanine DNA glycosylase, putative
TcCLB.509105.100	Enriched in surface-labeled proteome protein 15
TcCLB.508503.90	hypothetical protein, conserved
TcCLB.506871.20	hypothetical protein, conserved
TcCLB.509409.10	protein kinase, putative
TcCLB.509295.50	beta galactofuranosyl glycosyltransferase, putative
TcCLB.510693.200	mucin TcMUCII, putative
TcCLB.511837.110	hypothetical protein, conserved
TcCLB.509029.70	leucine-rich repeat protein, putative
TcCLB.508593.80	hypothetical protein, conserved
TcCLB.509937.170	hypothetical protein
TcCLB.508029.30	ATP dependent DEAD-box helicase, putative
TcCLB.506279.10	trans-sialidase, Group VI, putative
TcCLB.511865.40	hypothetical protein, conserved
TcCLB.506509.60	hypothetical protein, conserved
TcCLB.506855.70	hypothetical protein, conserved
TcCLB.511301.120	hypothetical protein, conserved
TcCLB.507053.110	hypothetical protein, conserved
TcCLB.509569.160	hypothetical protein, conserved
TcCLB.507519.60	Silent information regulator 2 related protein 1
TcCLB.508231.210	hypothetical protein, conserved
TcCLB.507005.80	hypothetical protein, conserved
TcCLB.508959.10	hypothetical protein, conserved
TcCLB.508815.50	hypothetical protein, conserved
TcCLB.511633.70	protein kinase, putative
TcCLB.510967.13	hypothetical protein, conserved
TcCLB.511661.100	protein kinase, putative
TcCLB.508799.30	hypothetical protein, conserved
TcCLB.508919.70	protein kinase, putative
TcCLB.510787.10	trans-sialidase, Group I, putative
TcCLB.510359.90	hypothetical protein, conserved
TcCLB.508543.129	hypothetical protein, conserved
TcCLB.506679.120	hypothetical protein
TcCLB.511277.560	synaptotagmin, putative
TcCLB.510667.140	ribulose-phosphate 3-epimerase, putative
TcCLB.510885.110	hypothetical protein, conserved
TcCLB.508153.510	serine/threonine-protein kinase Nek, putative
TcCLB.510943.198	hypothetical protein, conserved
TcCLB.508917.20	hypothetical protein, conserved
TcCLB.510519.30	mitochondrial structure specific endonuclease I (SSE-1), putative
TcCLB.509671.84	hypothetical protein, conserved
TcCLB.503939.10	acetyltransferase, putative
TcCLB.507065.70	mucin TcMUCII, putative
TcCLB.506593.50	hypothetical protein, conserved
TcCLB.509877.89	hypothetical protein, conserved
TcCLB.510329.350	hypothetical protein, conserved
TcCLB.507005.40	zinc finger protein, putative
TcCLB.508879.70	hypothetical protein, conserved
TcCLB.511249.40	hypothetical protein, conserved
TcCLB.510681.20	myosin heavy chain kinase A, putative
TcCLB.510421.90	protein kinase, putative
TcCLB.510305.40	hypothetical protein, conserved
TcCLB.506145.20	hypothetical protein, conserved
TcCLB.505071.140	protein kinase, putative
TcCLB.509791.60	Flagellum attachment zone protein 5
TcCLB.508479.280	hypothetical protein, conserved
TcCLB.511283.310	hypothetical protein, conserved
TcCLB.511817.270	hypothetical protein, conserved
TcCLB.507063.130	protein kinase, putative
TcCLB.511725.120	kinetoplast polyadenylation/uridylation factor 2, putative
TcCLB.505193.90	hypothetical protein, conserved
TcCLB.509331.20	hypothetical protein, conserved
TcCLB.508737.40	hypothetical protein
TcCLB.509429.130	hypothetical protein, conserved
TcCLB.509911.130	Flagellum attachment zone protein 14
TcCLB.509747.60	hypothetical protein, conserved
TcCLB.507063.100	mitochondrial DNA polymerase beta-PAK, putative
TcCLB.507951.154	cytochrome b5, putative
TcCLB.509693.209	mismatch repair protein, putative
TcCLB.508479.230	peroxin-2, putative
TcCLB.510629.410	hypothetical protein, conserved
TcCLB.506511.60	flavoprotein monooxygenase, putative
TcCLB.511277.180	hypothetical protein, conserved
TcCLB.508891.40	hypothetical protein, conserved
TcCLB.509911.40	hypothetical protein, conserved
TcCLB.509509.40	hypothetical protein, conserved
TcCLB.509253.40	hypothetical protein, conserved
TcCLB.510687.50	hypothetical protein, conserved
TcCLB.507491.140	hypothetical protein, conserved
TcCLB.508899.80	hypothetical protein, conserved
TcCLB.510305.60	hypothetical protein, conserved
TcCLB.507895.80	hypothetical protein, conserved
TcCLB.508637.66	hypothetical protein, conserved
TcCLB.508505.30	hypothetical protein, conserved
TcCLB.508435.60	mucin TcMUCII, putative
TcCLB.509053.80	hypothetical protein, conserved
TcCLB.509611.40	hypothetical protein, conserved
TcCLB.503823.20	hypothetical protein, conserved
TcCLB.506611.70	surface protease GP63, putative
TcCLB.503861.50	beta galactofuranosyl glycosyltransferase, putative
TcCLB.504741.4	hypothetical protein, conserved
TcCLB.510479.30	hypothetical protein
TcCLB.508881.110	GTP-binding protein, putative
TcCLB.509997.60	hypothetical protein, conserved
TcCLB.508641.110	hypothetical protein, conserved
TcCLB.503521.20	hypothetical protein, conserved
TcCLB.504243.30	hypothetical protein, conserved
TcCLB.506009.50	hypothetical protein, conserved
TcCLB.511815.100	hypothetical protein, conserved
TcCLB.509429.170	hypothetical protein, conserved
TcCLB.508533.20	hypothetical protein, conserved
TcCLB.510569.10	trans-sialidase, putative
TcCLB.511507.70	calpain-like cysteine peptidase, putative
TcCLB.510303.70	hypothetical protein, conserved
TcCLB.510657.150	hypothetical protein
TcCLB.507515.110	hypothetical protein, conserved
TcCLB.509065.170	hypothetical protein, conserved
TcCLB.510733.40	hypothetical protein, conserved
TcCLB.509553.10	hypothetical protein, conserved
TcCLB.510903.20	hypothetical protein, conserved
TcCLB.507087.70	hypothetical protein, conserved
TcCLB.511283.140	hypothetical protein, conserved
TcCLB.504243.10	RNA-binding protein, putative
TcCLB.503703.90	hypothetical protein, conserved
TcCLB.510187.360	hypothetical protein, conserved
TcCLB.508547.60	hypothetical protein, conserved
TcCLB.506573.50	hypothetical protein, conserved
TcCLB.509027.24	hypothetical protein, conserved
TcCLB.504199.10	hypothetical protein, conserved
TcCLB.506435.90	hypothetical protein, conserved
TcCLB.511461.14	glyceraldehyde 3-phosphate dehydrogenase, putative
TcCLB.511909.10	hypothetical protein, conserved
TcCLB.508045.60	hypothetical protein, conserved
TcCLB.503657.50	hypothetical protein, conserved
TcCLB.506303.100	hypothetical protein, conserved
TcCLB.506219.10	hypothetical protein, conserved
TcCLB.511321.20	hypothetical protein, conserved
TcCLB.508153.590	hypothetical protein, conserved
TcCLB.506469.30	protein kinase, putative
TcCLB.410049.20	hypothetical protein, conserved
TcCLB.508909.300	hypothetical protein, conserved
TcCLB.510001.20	hypothetical protein, conserved
TcCLB.511283.290	hypothetical protein, conserved
TcCLB.510045.30	protein kinase, putative
TcCLB.506789.200	ubiquitin-conjugating enzyme E2, putative
TcCLB.511209.40	hypothetical protein, conserved
TcCLB.508641.80	hypothetical protein, conserved
TcCLB.509569.80	hypothetical protein
TcCLB.507053.100	ubiquitin hydrolase, putative
TcCLB.509027.70	kinetoplastid kinetochore protein 19, putative
TcCLB.510437.60	hypothetical protein, conserved
TcCLB.508461.160	hypothetical protein, conserved
TcCLB.506445.30	cation transporter, putative
TcCLB.504131.130	hypothetical protein, conserved
TcCLB.507681.180	hypothetical protein, conserved
TcCLB.506883.34	hypothetical protein, conserved
TcCLB.504085.10	hypothetical protein, conserved
TcCLB.511727.30	hypothetical protein, conserved
TcCLB.508461.300	hypothetical protein, conserved
TcCLB.503781.60	tRNA pseudouridine synthase A, putative
TcCLB.509605.10	malonyl-CoA decarboxylase, mitochondrial precursor, putative
TcCLB.511903.10	hypothetical protein
TcCLB.508865.30	immunodominant antigen, putative
TcCLB.508153.1130	hypothetical protein
TcCLB.508547.100	hypothetical protein, conserved
TcCLB.508815.130	hypothetical protein, conserved
TcCLB.509495.30	trans-sialidase, Group I, putative
TcCLB.506327.90	serine/threonine protein kinase, putative
TcCLB.509733.180	adenylate kinase, putative
TcCLB.509213.90	hypothetical protein, conserved
TcCLB.511167.50	hypothetical protein, conserved
TcCLB.503781.50	hypothetical protein, conserved
TcCLB.504013.70	Carboxypeptidase-like protein
TcCLB.506975.66	hypothetical protein, conserved
TcCLB.511909.70	hypothetical protein, conserved
TcCLB.510729.20	hypothetical protein, conserved
TcCLB.506789.160	hypothetical protein, conserved
TcCLB.508897.50	hypothetical protein, conserved
TcCLB.508303.30	hypothetical protein, conserved
TcCLB.511279.20	hypothetical protein, conserved
TcCLB.508175.260	inorganic polyphosphate/ATP-NAD kinase, putative
TcCLB.507787.150	hypothetical protein, conserved
TcCLB.507787.130	hypothetical protein, conserved
TcCLB.510039.100	hypothetical protein, conserved
TcCLB.503541.10	hypothetical protein, conserved
TcCLB.506425.30	hypothetical protein, conserved
TcCLB.510679.70	lipase, putative
TcCLB.506247.80	Bromodomain factor 1
TcCLB.506475.130	hypothetical protein, conserved
TcCLB.506727.110	hypothetical protein, conserved
TcCLB.508737.130	hypothetical protein, conserved
TcCLB.503521.80	hypothetical protein, conserved
TcCLB.511153.70	hypothetical protein, conserved
TcCLB.506999.140	hypothetical protein, conserved
TcCLB.509643.120	hypothetical protein, conserved
TcCLB.511661.10	hypothetical protein, conserved
TcCLB.503797.4	hypothetical protein, conserved

## Sheet: 22 Pt-dppf-mpo up
22 elements included exclusively in diferentially expressed genes in Pt-dppf-mpo
Gene ID	Description
TcCLB.506193.60	ascorbate peroxidase, putative
TcCLB.508799.270	protein associated with differentiation 4, putative
TcCLB.508153.560	hypothetical protein, conserved
TcCLB.509105.140	heat shock protein 85, putative
TcCLB.509105.150	heat shock protein 85, putative
TcCLB.509643.139	Heat shock protein 83, putative
TcCLB.509643.130	heat shock protein 85, putative
TcCLB.511269.40	cAMP phosphodiesterase A, putative
TcCLB.508661.70	Enriched in surface-labeled proteome protein 18
TcCLB.508857.130	hypothetical protein, conserved
TcCLB.511565.30	mucin TcMUCII, putative
TcCLB.506439.9	myosin heavy chain, putative
TcCLB.509605.20	hypothetical protein, conserved
TcCLB.506355.10	glucose transporter
TcCLB.504741.250	protein kinase, putative
TcCLB.506355.5	hexose transporter, putative
TcCLB.506153.20	amino acid transporter, putative
TcCLB.506153.10	amino acid transporter, putative
TcCLB.424123.20	paraflagellar rod component, putative
TcCLB.511725.30	hypothetical protein, conserved
TcCLB.509569.30	hypothetical protein, conserved
TcCLB.511865.90	dynein heavy chain, putative

## Sheet: 110 Common downregulated genes
110 common elements in diferentially expressed genes between Pd-dppf-mpo and Pt-dppf-mpo
Gene ID	Description
TcCLB.503923.30	hypothetical protein, conserved
TcCLB.511033.20	hypothetical protein
TcCLB.507659.10	hypothetical protein, conserved
TcCLB.508881.30	hypothetical protein, conserved
TcCLB.506315.100	protein phosphatase 2C, putative
TcCLB.507969.30	sphingosine-1-phosphate phosphatase, putative
TcCLB.508153.1074	hypothetical protein, conserved
TcCLB.511661.40	signal peptidase type I, putative
TcCLB.506297.300	eukaryotic release factor 3, putative
TcCLB.510659.250	phospholipase A1, putative
TcCLB.507765.130	hypothetical protein, conserved
TcCLB.504003.60	chaperonin/T-complex protein 1 gamma subunit, putative
TcCLB.511367.138	chaperone DNAJ protein, putative
TcCLB.509237.50	hypothetical protein, conserved
TcCLB.508641.184	Eukaryotic translation initiation factor 1, putative
TcCLB.504113.30	hypothetical protein, conserved
TcCLB.508593.110	arginine N-methyltransferase, putative
TcCLB.508173.264	peripherally associated ATOM36
TcCLB.509911.90	peptidase, putative
TcCLB.508027.70	ATP-dependent RNA helicase, putative
TcCLB.511389.130	diphthine synthase, putative
TcCLB.508641.200	hypothetical protein, conserved
TcCLB.507017.40	2-hydroxy-3-oxopropionate reductase, putative
TcCLB.508355.160	hypothetical protein, conserved
TcCLB.510731.68	hypothetical protein, conserved
TcCLB.509795.30	hypothetical protein, conserved
TcCLB.507005.4	acyl transferase-like protein
TcCLB.508479.274	hypothetical protein, conserved
TcCLB.506201.154	hypothetical protein, conserved
TcCLB.509179.110	hypothetical protein, conserved
TcCLB.508479.350	eukaryotic translation initiation factor 3 subunit j
TcCLB.510901.10	hypothetical protein, conserved
TcCLB.503471.10	protein tyrosine phosphatase, putative
TcCLB.510901.200	differentiation inhibitory kinase, putative
TcCLB.511383.40	eukaryotic translation initiation factor 4 gamma 3
TcCLB.511725.250	chaperonin containing t-complex protein, putative
TcCLB.511727.140	phenylalanyl-tRNA synthetase alpha chain, putative
TcCLB.509693.80	hypoxanthine-guanine phosphoribosyltransferase, putative
TcCLB.506247.50	T-complex protein 1, theta subunit, putative
TcCLB.508707.227	ATP binding protein-like protein, putative
TcCLB.504069.90	centromere/microtubule binding protein cbf5, putative
TcCLB.511287.90	ribosome biogenesis protein, putative
TcCLB.503809.110	phosphatidic acid phosphatase protein, putative
TcCLB.507519.140	Adenine phosphoribosyltransferase, putative
TcCLB.511367.60	Lupus La protein homolog, putative
TcCLB.509261.30	3,2-trans-enoyl-CoA isomerase, mitochondrial precursor, putative
TcCLB.510657.90	hypothetical protein, conserved
TcCLB.508153.640	inosine-adenosine-guanosine-nucleosidehydrolase, putative
TcCLB.506247.450	hypothetical protein, conserved
TcCLB.507031.29	nucleosome assembly protein, putative
TcCLB.508707.70	hypothetical protein, conserved
TcCLB.510155.180	Eukaryotic initiation factor 4A-1
TcCLB.507023.50	hypothetical protein, conserved
TcCLB.508173.180	mRNA transport regulator MTR2, putative
TcCLB.510817.60	hypothetical protein, conserved
TcCLB.503995.50	oligopeptidase b
TcCLB.508269.60	exosome-associated protein 4, putative
TcCLB.506627.100	hypothetical protein, conserved
TcCLB.503945.10	eukaryotic translation initiation factor 1A, putative
TcCLB.510729.80	Mitochondrial import receptor subunit ATOM40, putative
TcCLB.509319.90	trypanothione synthetase
TcCLB.511287.150	fibrillarin, putative
TcCLB.510687.120	snoRNP protein GAR1, putative
TcCLB.508173.40	mercaptopyruvate sulfurtransferase, putative
TcCLB.509161.20	hypothetical protein, conserved
TcCLB.508897.110	macrophage infectivity potentiator, precursor, putative
TcCLB.507649.70	nucleolar RNA-binding protein, putative
TcCLB.508351.40	cytochrome c oxidase assembly factor, putative
TcCLB.510299.50	GPI alpha-mannosyltransferase III
TcCLB.510001.10	hypothetical Zinc-finger containing protein
TcCLB.506263.30	D-isomer specific 2-hydroxyacid dehydrogenase-protein, putative
TcCLB.506247.40	hypothetical protein, conserved
TcCLB.506275.20	ATP-dependent protease subunit HslV, putative
TcCLB.509053.70	p22 protein precursor, putative
TcCLB.503809.120	hypothetical protein, conserved
TcCLB.509793.40	kinetoplast-associated protein
TcCLB.511761.60	hypothetical protein, conserved
TcCLB.508461.410	T-complex protein 1, eta subunit, putative
TcCLB.507513.50	heat shock 70 kDa protein, putative
TcCLB.507583.20	nucleolar protein, putative
TcCLB.511025.70	chaperonin alpha subunit, putative
TcCLB.506195.300	deoxyhypusine synthase, putative
TcCLB.509253.30	3-Beta-hydroxysteroid-delta(8), delta(7)-isomerase, putative
TcCLB.508971.30	lysyl-tRNA synthetase, putative
TcCLB.506247.330	2,3-bisphosphoglycerate-independent phosphoglycerate mutase, putative
TcCLB.506821.110	hypothetical protein, conserved
TcCLB.510003.20	hypothetical protein, conserved
TcCLB.503625.10	asparagine synthetase a, putative
TcCLB.511899.10	2-amino-3-ketobutyrate coenzyme A ligase, putative
TcCLB.505183.30	malic enzyme, putative
TcCLB.509715.40	fibrillarin, putative
TcCLB.511899.40	2-amino-3-ketobutyrate coenzyme A ligase, putative
TcCLB.511283.124	mitochondrial carrier protein, putative
TcCLB.509937.20	Bifunctional NAD(P)H-hydrate repair enzyme
TcCLB.510099.120	D-isomer specific 2-hydroxyacid dehydrogenase-protein, putative
TcCLB.507057.40	hypothetical protein, conserved
TcCLB.509799.140	L-2-hydroxyglutarate dehydrogenase, mitochondrial, putative
TcCLB.508411.10	cofilin/actin depolymerizing factor, putative
TcCLB.504839.50	nucleosome assembly protein-like protein, putative
TcCLB.511261.160	pyruvate dehydrogenase E1 component alpha subunit, putative
TcCLB.503925.80	CDP-diacylglycerol--inositol 3-phosphatidyltransferase
TcCLB.510153.19	tricarboxylate carrier, putative
TcCLB.508153.820	inorganic pyrophosphatase, putative
TcCLB.510445.50	S-adenosylmethionine synthetase, putative
TcCLB.511491.70	endosomal integral membrane protein, putative
TcCLB.510943.50	delta-1-pyrroline-5-carboxylate dehydrogenase, putative
TcCLB.511281.40	mevalonate-diphosphate decarboxylase, putative
TcCLB.509105.90	MRB1-associated protein, putative
TcCLB.510947.50	cyclophilin, putative
TcCLB.507913.20	phosphomevalonate kinase protein, putative

## Sheet: 1141 Pd-dppf-mpo down
1141 elements included exclusively in diferentially expressed genes in Pd-dppf-mpo
Gene ID	Description
TcCLB.508881.90	hypothetical protein, conserved
TcCLB.509671.120	rRNA processing protein, putative
TcCLB.508911.20	hypothetical protein, conserved
TcCLB.509179.180	zinc-finger protein ZPR1, putative
TcCLB.507895.150	hypothetical protein, conserved
TcCLB.511761.80	hypothetical protein
TcCLB.506727.140	hypothetical protein, conserved
TcCLB.510187.510	hypothetical protein, conserved
TcCLB.509331.160	hypothetical protein, conserved
TcCLB.506247.240	hypothetical protein, conserved
TcCLB.511837.20	hypothetical protein, conserved
TcCLB.508479.210	hypothetical protein, conserved
TcCLB.510003.9	hypothetical protein, conserved
TcCLB.506989.190	heat shock protein 90, putative
TcCLB.508693.10	cleavage and polyadenylation specificity factor, putative
TcCLB.504741.130	hypothetical protein, conserved
TcCLB.508355.180	hypothetical protein, conserved
TcCLB.511391.120	glutamamyl carboxypeptidase, putative
TcCLB.510655.120	aminopeptidase P, putative
TcCLB.508641.210	hypothetical protein, conserved
TcCLB.504797.130	hypothetical protein, conserved
TcCLB.511021.99	hypothetical protein, conserved
TcCLB.510661.110	Present in the outer mitochondrial membrane proteome 7
TcCLB.508737.150	mitochondrial carrier protein, putative
TcCLB.509029.140	hypothetical protein, conserved
TcCLB.503877.19	hypothetical protein, conserved
TcCLB.506833.70	cationic amino acid transporter, putative
TcCLB.506815.40	mitochondrial RNA binding complex 1 subunit, putative
TcCLB.509109.100	hypothetical protein, conserved
TcCLB.506999.10	hypothetical protein, conserved
TcCLB.503723.40	hypothetical protein, conserved
TcCLB.508637.120	hypothetical protein, conserved
TcCLB.507601.30	hypothetical protein, conserved
TcCLB.506355.140	hypothetical protein, conserved
TcCLB.509575.10	retrotransposon hot spot (RHS) protein, putative
TcCLB.507601.140	ATP-dependent RNA helicase, putative
TcCLB.509461.40	hypothetical protein, conserved
TcCLB.510443.30	hypothetical protein, conserved
TcCLB.511153.84	hypothetical protein, conserved
TcCLB.506679.40	mitogen-activated protein kinase kinase 5
TcCLB.511277.486	hypothetical protein, conserved
TcCLB.511825.170	serine/threonine protein phosphatase, putative
TcCLB.508699.10	DNA topoisomerase II, putative
TcCLB.506585.60	hypothetical protein, conserved
TcCLB.506629.180	hypothetical protein, conserved
TcCLB.506193.20	hypothetical protein, conserved
TcCLB.509033.40	hypothetical protein, conserved
TcCLB.505071.100	phosphatidylglycerolphosphate synthase, mitochondrial, putative
TcCLB.506139.160	Mucin-associated surface protein (MASP), subgroup S100
TcCLB.503929.20	ribosomal protein L13, putative
TcCLB.504045.120	hypothetical protein, conserved
TcCLB.508409.320	hypothetical protein, conserved
TcCLB.508911.70	hypothetical protein
TcCLB.509471.59	histone H3, putative
TcCLB.507773.40	hypothetical protein, conserved
TcCLB.507763.30	anion-transporting ATPase-like, putative
TcCLB.506155.10	hypothetical protein, conserved
TcCLB.508873.420	Present in the outer mitochondrial membrane proteome 10
TcCLB.509641.50	hypothetical protein, conserved
TcCLB.508027.60	hypothetical protein
TcCLB.511031.49	hypothetical protein, conserved
TcCLB.506989.220	hypothetical protein, conserved
TcCLB.511865.60	hypothetical protein, conserved
TcCLB.401469.20	pumilio/PUF RNA binding protein 7, putative
TcCLB.508643.9	pre-mRNA-splicing factor ATP-dependent RNA helicase, putative
TcCLB.506435.220	hypothetical protein, conserved
TcCLB.510901.80	hypothetical protein, conserved
TcCLB.508153.750	hypothetical protein, conserved
TcCLB.506195.260	hypothetical protein
TcCLB.503815.10	alkyl-dihydroxyacetone phosphate synthase, putative
TcCLB.511819.59	dynein heavy chain, cytosolic, putative
TcCLB.504085.20	exosome-associated protein 2, putative
TcCLB.506559.70	hypothetical protein, conserved
TcCLB.510221.30	hypothetical protein, conserved
TcCLB.506561.10	helicase-like protein, putative
TcCLB.508355.300	hypothetical protein, conserved
TcCLB.509207.20	histone H2A, putative
TcCLB.511847.20	hypothetical protein, conserved
TcCLB.511277.60	alcohol dehydrogenase, putative
TcCLB.511509.40	NUDIX hydrolase domain-like domain-containing protein
TcCLB.510887.40	hypothetical protein, conserved
TcCLB.508821.20	hypothetical protein, conserved
TcCLB.506391.20	calmodulin, putative
TcCLB.509471.77	histone H3, putative
TcCLB.508461.143	hypothetical protein, conserved
TcCLB.511755.28	hypothetical protein, conserved
TcCLB.508153.800	hypothetical protein
TcCLB.511249.90	hypothetical protein, conserved
TcCLB.503565.20	hypothetical protein, conserved
TcCLB.506275.30	hypothetical protein, conserved
TcCLB.510359.230	hypothetical protein, conserved
TcCLB.511323.50	NADH-ubiquinone oxidoreductase, mitochondrial, putative
TcCLB.507515.4	trypanothione/tryparedoxin dependent peroxidase 2, putative
TcCLB.509799.10	beta adaptin, putative
TcCLB.509937.80	hypothetical protein, conserved
TcCLB.509569.10	hypothetical protein, conserved
TcCLB.510187.410	hypothetical protein, conserved
TcCLB.507017.10	hypothetical protein, conserved
TcCLB.506391.10	calmodulin
TcCLB.509911.70	mu-adaptin 4, putative
TcCLB.509997.30	tryparedoxin 1, putative
TcCLB.507969.54	hypothetical protein, conserved
TcCLB.508233.50	variant-surface-glycoprotein phospholipase C, putative
TcCLB.509693.180	hypothetical protein, conserved
TcCLB.511807.200	hypothetical protein, conserved
TcCLB.504131.160	hypothetical protein
TcCLB.509877.80	ATPase domain protein, putative
TcCLB.507513.30	hypothetical protein, conserved
TcCLB.510657.50	hypothetical protein, conserved
TcCLB.508355.100	diacylglycerol acyltransferase, putative
TcCLB.508547.130	NUDIX family hydrolase, putative
TcCLB.506821.20	ATP-dependent Clp protease subunit, heat shock protein 104 (HSP104), putative
TcCLB.506241.50	hypothetical protein, conserved
TcCLB.508799.250	hypothetical protein, conserved
TcCLB.508299.30	hypothetical protein
TcCLB.508881.50	hypothetical protein, conserved
TcCLB.509733.134	hypothetical protein, conserved
TcCLB.507649.10	hypothetical protein, conserved
TcCLB.508461.284	mitochondrial carrier protein, putative
TcCLB.509207.150	kinesin, putative
TcCLB.507915.19	mismatch repair protein MSH3, putative
TcCLB.506821.170	aquaporin-like protein, putative
TcCLB.511153.64	Histone H2B variant V
TcCLB.506819.20	hypothetical protein
TcCLB.506999.130	hypothetical protein, conserved
TcCLB.509553.40	ribonuclease mar1, putative
TcCLB.506977.130	ras-related protein Rab21, putative
TcCLB.508909.70	hypothetical protein, conserved
TcCLB.507715.100	hypothetical protein, conserved
TcCLB.506247.120	hypothetical protein, conserved
TcCLB.504131.60	hypothetical protein, conserved
TcCLB.508881.10	hypothetical protein, conserved
TcCLB.511277.190	ras-related GTP-binding protein, putative
TcCLB.506593.10	hypothetical protein, conserved
TcCLB.508661.30	DnaJ chaperone protein, putative
TcCLB.511367.280	hypothetical protein, conserved
TcCLB.507005.70	pre-rRNA-processing protein PNO1, putative
TcCLB.506629.190	hypothetical protein, conserved
TcCLB.511923.130	hypothetical protein, conserved
TcCLB.509177.68	translation initiation factor, putative
TcCLB.509471.68	histone H3, putative
TcCLB.510155.60	hypothetical protein, conserved
TcCLB.508153.1140	hypothetical protein, conserved
TcCLB.506275.9	RNA polymerase-associated protein CDC73, putative
TcCLB.506443.30	hypothetical protein, conserved
TcCLB.510659.120	dolichol kinase, putative
TcCLB.511273.59	5-oxoprolinase, putative
TcCLB.503823.130	hypothetical protein, conserved
TcCLB.509175.18	hypothetical protein, conserved
TcCLB.508817.140	hypothetical protein, conserved
TcCLB.511277.590	hypothetical protein, conserved
TcCLB.506883.50	Present in the outer mitochondrial membrane proteome 5
TcCLB.511507.10	hypothetical protein, conserved
TcCLB.505999.170	hypothetical protein, conserved
TcCLB.509055.20	hypothetical protein, conserved
TcCLB.511383.50	prohibitin, putative
TcCLB.508461.10	Present in the outer mitochondrial membrane proteome 6
TcCLB.506883.40	Lsm12 protein, putative
TcCLB.511661.60	hypothetical protein, conserved
TcCLB.504069.10	proteasome alpha 2 subunit, putative
TcCLB.510901.30	hypothetical protein, conserved
TcCLB.507081.120	hypothetical protein, conserved
TcCLB.511807.280	hypothetical protein, conserved
TcCLB.503769.40	cytochrome oxidase subunit VII
TcCLB.511231.69	hypothetical protein, conserved
TcCLB.511815.10	hypothetical protein
TcCLB.510121.9	hypothetical protein, conserved
TcCLB.508269.20	hypothetical protein, conserved
TcCLB.506989.199	hypothetical protein, conserved
TcCLB.506123.24	dynein light chain, putative
TcCLB.510889.110	primase 2, putative
TcCLB.510359.330	hypothetical protein, conserved
TcCLB.509331.40	hypothetical protein, conserved
TcCLB.509717.30	hypothetical protein, conserved
TcCLB.509023.110	ATP-dependent protease ATPase subunit HslU2
TcCLB.412435.10	hypothetical protein, conserved
TcCLB.508153.880	hypothetical protein, conserved
TcCLB.510099.90	tyrosine phosphatase isoform, putative
TcCLB.508153.1050	hypothetical protein, conserved
TcCLB.506669.10	hypothetical protein, conserved
TcCLB.509471.86	histone H3, putative
TcCLB.509553.50	DNA repair and recombination helicase protein PIF5, putative
TcCLB.505939.50	hypothetical protein
TcCLB.506177.130	hypothetical protein, conserved
TcCLB.508175.39	hypothetical protein, conserved
TcCLB.505997.210	DNA-directed RNA polymerase III subunit, putative
TcCLB.511491.140	hypothetical protein, conserved
TcCLB.506297.220	hypothetical protein, conserved
TcCLB.511855.50	hypothetical protein, conserved
TcCLB.504741.190	hypothetical protein, conserved
TcCLB.511495.20	hypothetical protein, conserved
TcCLB.508741.350	hypothetical protein, conserved
TcCLB.510687.30	hypothetical protein, conserved
TcCLB.509353.60	calmodulin, putative
TcCLB.508461.330	hypothetical protein
TcCLB.510635.40	hypothetical protein, conserved
TcCLB.511717.90	phosphomannose isomerase, putative
TcCLB.510187.448	hypothetical protein, conserved
TcCLB.511025.100	chaperone DNAJ protein, putative
TcCLB.511381.50	hypothetical protein, conserved
TcCLB.503891.40	hypothetical protein, conserved
TcCLB.509671.90	COP-coated vesicle membrane protein gp25L precursor, putative
TcCLB.508741.310	hypothetical protein
TcCLB.509567.60	hypothetical protein
TcCLB.507969.70	hypothetical protein, conserved
TcCLB.511807.60	hypothetical protein, conserved
TcCLB.508257.40	hypothetical protein, conserved
TcCLB.426897.10	hypothetical protein
TcCLB.460747.30	hypothetical protein, conserved
TcCLB.511861.90	retrotransposon hot spot (RHS) protein, putative
TcCLB.504037.20	hypothetical protein, conserved
TcCLB.509437.60	hypothetical protein, conserved
TcCLB.506957.46	hypothetical protein, conserved
TcCLB.509539.50	small GTP-binding protein, putative
TcCLB.510575.130	chloride channel protein, putative
TcCLB.511817.180	histone H2A, putative
TcCLB.509715.80	hypothetical protein, conserved
TcCLB.507221.20	poly(A)-specific ribonuclease PARN, putative
TcCLB.509105.10	hypothetical protein, conserved
TcCLB.506679.170	hypothetical protein, conserved
TcCLB.507765.30	hypothetical protein, conserved
TcCLB.508649.10	Beta propeller protein 1
TcCLB.505997.60	retrotransposon hot spot (RHS) protein, putative
TcCLB.507951.160	succinate dehydrogenase flavoprotein subunit
TcCLB.508827.40	acyl-CoA dehydrogenase, putative
TcCLB.510329.240	hypothetical protein, conserved
TcCLB.506821.180	aquaporin-like protein, putative
TcCLB.508045.30	hypothetical protein, conserved
TcCLB.511815.170	cytoskeleton associated protein, putative
TcCLB.506435.270	dihydroxyacetone phosphate acyltransferase, putative
TcCLB.506989.40	Golgi vesicular membrane trafficking protein, putative
TcCLB.504105.190	hypothetical protein, conserved
TcCLB.508879.40	hypothetical protein, conserved
TcCLB.511291.30	lipoic acid synthetase, mitochondrial precursor, putative
TcCLB.506983.30	hypothetical protein, conserved
TcCLB.511897.28	hypothetical protein, conserved
TcCLB.506957.23	hypothetical protein, conserved
TcCLB.510655.130	hypothetical protein, conserved
TcCLB.511321.50	hypothetical protein, conserved
TcCLB.504045.110	urocanate hydratase, putative
TcCLB.507053.160	hypothetical protein, conserved
TcCLB.507951.150	guanine deaminase, putative
TcCLB.511635.69	hypothetical protein, conserved
TcCLB.505999.180	Non cytoplasmic domain containing protein, conserved
TcCLB.508153.900	hypothetical protein, conserved
TcCLB.508173.200	hypothetical protein, conserved
TcCLB.509569.44	Archaic translocase of outer membrane 12 kDa subunit, putative
TcCLB.511239.90	hypothetical protein
TcCLB.506883.69	hypothetical protein, conserved
TcCLB.503847.50	hypothetical protein, conserved
TcCLB.503869.40	pumilio/PUF RNA binding protein 9, putative
TcCLB.507007.74	small nuclear ribonucleoprotein Sm-F, putative
TcCLB.506145.40	hypothetical protein, conserved
TcCLB.509057.10	hypothetical protein, conserved
TcCLB.509857.10	hypothetical protein, conserved
TcCLB.508857.110	hypothetical protein, conserved
TcCLB.506443.50	hypothetical protein, conserved
TcCLB.506727.130	hypothetical protein, conserved
TcCLB.508355.124	hypothetical protein, conserved
TcCLB.508741.270	Kinetoplastid RNA editing protein 1, putative
TcCLB.510729.70	proteasome alpha 1 subunit, putative
TcCLB.509715.9	Ribosomal RNA processing protein 41A
TcCLB.503987.60	hypothetical protein, conserved
TcCLB.511367.340	mitochondrial processing peptidase alpha subunit, putative
TcCLB.507001.110	galactokinase-like protein, putative
TcCLB.507681.220	pre-mRNA splicing factor ATP-dependent RNA helicase, putative
TcCLB.506789.220	hypothetical protein, conserved
TcCLB.510031.70	heat shock protein Hsp20, putative
TcCLB.504253.30	hypothetical protein, conserved
TcCLB.504797.60	hypothetical protein, conserved
TcCLB.508665.14	chaperone protein ClpB1, putative
TcCLB.511837.29	iron-sulfur cluster assembly protein, putative
TcCLB.503999.30	hypothetical protein, conserved
TcCLB.509317.90	hypothetical protein, conserved
TcCLB.509319.20	hypothetical protein, conserved
TcCLB.510119.40	hypothetical protein, conserved
TcCLB.511513.14	hypothetical protein, conserved
TcCLB.507771.30	hypothetical protein, conserved
TcCLB.506435.390	mitochondrial ATP-dependent zinc metallopeptidase, putative
TcCLB.508409.190	hypothetical protein, conserved
TcCLB.510357.70	ubiquinone biosynthesis protein-like protein, putative
TcCLB.511277.490	hypothetical protein, conserved
TcCLB.510187.480	phosphomannomutase, putative
TcCLB.504933.20	hypothetical protein
TcCLB.511827.10	hypothetical protein, conserved
TcCLB.509569.170	hypothetical protein
TcCLB.508859.74	J Biosynthesis Protein 2
TcCLB.511499.59	small nuclear ribonucleoprotein Sm-E, putative
TcCLB.506583.40	cdc2-related kinase 3, putative
TcCLB.506975.30	amidohydrolase, putative
TcCLB.509161.60	hypothetical protein, conserved
TcCLB.503911.20	pre-mRNA splicing factor ATP-dependent RNA helicase, putative
TcCLB.503935.20	2-oxoglutarate dehydrogenase, E2 component, dihydrolipoamide succinyltransferase, putative
TcCLB.509789.20	hypothetical protein
TcCLB.511021.70	ABC transporter of the mitochondrion, putative
TcCLB.508303.4	ubiquitin-conjugating enzyme E2, putative
TcCLB.507663.80	hypothetical protein, conserved
TcCLB.511821.90	hypothetical protein, conserved
TcCLB.506297.340	hypothetical protein, conserved
TcCLB.510153.5	hypothetical protein, conserved
TcCLB.508741.260	hypothetical protein, conserved
TcCLB.503431.60	acid phosphatase, putative
TcCLB.511837.40	hypothetical protein, conserved
TcCLB.510825.20	hypothetical protein, conserved
TcCLB.506195.210	hypothetical protein, conserved
TcCLB.506177.20	lectin, putative
TcCLB.510421.290	Mad2-like HORMA domain containing protein
TcCLB.503939.114	hypothetical protein, conserved
TcCLB.508355.240	hypothetical protein, conserved
TcCLB.509749.30	hypothetical protein, conserved
TcCLB.506821.90	hypothetical protein, conserved
TcCLB.506999.60	hypothetical protein, conserved
TcCLB.506303.111	hypothetical protein, conserved
TcCLB.508409.199	hypothetical protein, conserved
TcCLB.509037.50	aspartyl-tRNA synthetase, putative
TcCLB.509429.200	hypothetical protein, conserved
TcCLB.503823.60	hypothetical protein, conserved
TcCLB.511755.50	hypothetical protein, conserved
TcCLB.508543.100	eukaryotic translation initiation factor 3 subunit h
TcCLB.506835.70	PAS-domain containing phosphoglycerate kinase, putative
TcCLB.509437.110	retrotransposon hot spot (RHS) protein, putative
TcCLB.506957.100	hypothetical protein, conserved
TcCLB.509719.26	hypothetical protein, conserved
TcCLB.509603.10	vacuolar protein sorting 18, putative
TcCLB.511817.280	hypothetical protein, conserved
TcCLB.511925.40	hypothetical protein, conserved
TcCLB.503797.10	hypothetical protein, conserved
TcCLB.511281.20	transporter, putative
TcCLB.509063.10	hypothetical protein, conserved
TcCLB.506807.30	hypothetical protein, conserved
TcCLB.507675.10	hypothetical protein, conserved
TcCLB.510087.90	hypothetical protein, conserved
TcCLB.510303.280	hypothetical protein
TcCLB.509621.10	hypothetical protein, conserved
TcCLB.508397.60	methyltransferase, putative
TcCLB.509569.120	RNA-binding protein, putative
TcCLB.511381.40	DNA-directed rna polymerase I largest subunit, putative
TcCLB.508231.200	40S ribosomal protein S8, putative
TcCLB.508667.49	small nuclear ribonucleoprotein SmD2, putative
TcCLB.511003.190	hypothetical protein, conserved
TcCLB.503999.50	ubiquitin-conjugating enzyme, putative
TcCLB.508153.1080	hypothetical protein, conserved
TcCLB.504131.40	hypothetical protein, conserved
TcCLB.508543.80	hypothetical protein, conserved
TcCLB.511807.260	hypothetical protein, conserved
TcCLB.511727.300	GDP-L-fucose synthetase, putative
TcCLB.510729.50	hypothetical protein, conserved
TcCLB.506389.50	hypothetical protein, conserved
TcCLB.511287.110	hypothetical protein, conserved
TcCLB.508741.140	imidazolonepropionase, putative
TcCLB.509039.10	hypothetical protein, conserved
TcCLB.508445.99	pumilio/PUF RNA binding protein 7, putative
TcCLB.511229.20	oxidoreductase, putative
TcCLB.511293.10	extracellular receptor, putative
TcCLB.511815.150	hypothetical protein
TcCLB.510659.257	phospholipase A2-like protein, putative
TcCLB.506959.94	hypothetical protein, conserved
TcCLB.511523.80	hypothetical protein, conserved
TcCLB.511907.80	beta-ketoacyl-ACP reductase 2, putative
TcCLB.508707.300	hypothetical protein, conserved
TcCLB.506195.140	hypothetical protein, conserved
TcCLB.506325.10	retrotransposon hot spot (RHS) protein, putative
TcCLB.510659.194	hypothetical protein, conserved
TcCLB.510329.170	hypothetical protein, conserved
TcCLB.507049.20	hypothetical protein
TcCLB.506123.50	hypothetical protein, conserved
TcCLB.509911.100	chaperone DNAJ protein, putative
TcCLB.510031.50	ATP-dependent RNA helicase, putative
TcCLB.507891.29	flagellar calcium-binding 24 kDa protein
TcCLB.508443.20	DnaJ homolog, putative
TcCLB.507017.64	hypothetical protein, conserved
TcCLB.504071.100	hypothetical protein, conserved
TcCLB.506985.10	hypothetical protein, conserved
TcCLB.511245.200	hypothetical protein, conserved
TcCLB.507019.30	ribosome biogenesis regulatory protein (RRS1), putative
TcCLB.509733.140	hypothetical protein, conserved
TcCLB.507063.250	hypothetical protein
TcCLB.511807.150	hypothetical protein, conserved
TcCLB.508409.180	hypothetical protein, conserved
TcCLB.508409.338	DNA repair protein, putative
TcCLB.510659.104	poly(ADP-ribose) glycohydrolase, putative
TcCLB.509791.120	kinetoplast-associated protein
TcCLB.506295.70	hypothetical protein, conserved
TcCLB.507897.10	hypothetical protein, conserved
TcCLB.416511.9	mismatch repair protein MSH3, putative
TcCLB.511825.50	centrin-4, putative
TcCLB.507049.190	hypothetical protein, conserved
TcCLB.511643.10	hypothetical protein, conserved
TcCLB.508601.119	ribose 5-phosphate isomerase, putative
TcCLB.511025.120	CYC2-like cyclin, putative
TcCLB.507801.60	hypothetical protein, conserved
TcCLB.510643.190	retrotransposon hot spot (RHS) protein, putative
TcCLB.511827.64	hypothetical protein, conserved
TcCLB.404073.10	hypothetical protein, conserved
TcCLB.507063.90	mitochondrial DNA polymerase beta, putative
TcCLB.510901.70	mitochondrial RNA binding complex 1 subunit, putative
TcCLB.508547.40	hypothetical protein, conserved
TcCLB.503925.6	hypothetical protein, conserved
TcCLB.509395.70	hypothetical protein, conserved
TcCLB.511825.260	ribosomal RNA processing protein 45, putative
TcCLB.509177.10	hypothetical protein, conserved
TcCLB.510187.260	hypothetical protein, conserved
TcCLB.506985.30	proteasome alpha 3 subunit, putative
TcCLB.506295.150	hypothetical protein
TcCLB.511021.30	hypothetical protein, conserved
TcCLB.503735.40	hypothetical protein
TcCLB.503891.90	hypothetical protein
TcCLB.509679.9	leucyl-tRNA synthetase, putative
TcCLB.509693.40	hypothetical protein, conserved
TcCLB.507033.20	histone H3 variant V
TcCLB.509719.69	hypothetical protein, conserved
TcCLB.507225.19	hypothetical protein
TcCLB.510119.60	hypothetical protein, conserved
TcCLB.509913.20	hypothetical protein, conserved
TcCLB.508409.40	Putative intraflagellar transport protein B2
TcCLB.508707.160	hypothetical protein, conserved
TcCLB.507623.125	hypothetical protein, conserved
TcCLB.508707.224	tubulin binding cofactor A-like protein, putative
TcCLB.510301.60	hypothetical protein, conserved
TcCLB.506471.10	hypothetical protein, conserved
TcCLB.508741.10	hypothetical protein
TcCLB.509023.180	kinesin, putative
TcCLB.504069.70	vacuolar ATP synthase, putative
TcCLB.416891.19	hypothetical protein
TcCLB.508501.230	monothiol glutaredoxin, putative
TcCLB.509721.30	intraflagellar transport protein 122B, putative
TcCLB.508821.60	hypothetical protein, conserved
TcCLB.510885.60	calcium-activated potassium channel, putative
TcCLB.507007.70	Co-chaperone protein P23
TcCLB.508625.150	L-ribulokinase, putative
TcCLB.508917.49	peptidase t, putative
TcCLB.510729.160	hypothetical protein, conserved
TcCLB.509505.60	hypothetical protein
TcCLB.508593.30	hypothetical protein, conserved
TcCLB.508661.10	Eukaryotic translation initiation factor 4E type 5, putative
TcCLB.508153.730	Eukaryotic translation initiation factor 2 subunit alpha
TcCLB.508409.140	hypothetical protein, conserved
TcCLB.504797.14	hypothetical protein, conserved
TcCLB.504741.180	hypothetical protein, conserved
TcCLB.507715.34	hypothetical protein, conserved
TcCLB.510155.120	ubiquitin activating enzyme, putative
TcCLB.511391.200	pitrilysin-like metalloprotease, putative
TcCLB.506817.40	hypothetical protein, conserved
TcCLB.508043.30	ubiquitin-activating enzyme E1, putative
TcCLB.507969.60	C-14 sterol reductase, putative
TcCLB.509065.140	hypothetical protein, conserved
TcCLB.510395.20	hypothetical protein, conserved
TcCLB.509105.60	adenosine deaminase-like protein, putative
TcCLB.509317.60	RNA-binding protein, putative
TcCLB.509573.30	flagellar protofilament ribbon protein, putative
TcCLB.511277.550	hypothetical protein, conserved
TcCLB.511301.100	hypothetical protein, conserved
TcCLB.511465.10	proteasome activator protein pa26, putative
TcCLB.508199.10	ADP-ribosylation factor, putative
TcCLB.509177.50	hypothetical protein, conserved
TcCLB.504001.10	hypothetical protein, conserved
TcCLB.506839.34	oxidoreductase, putative
TcCLB.508355.20	hypothetical protein, conserved
TcCLB.511031.20	hypothetical protein, conserved
TcCLB.503869.50	exosome-associated protein 1, putative
TcCLB.511281.10	hypothetical protein, conserved
TcCLB.504131.100	DnaJ chaperone protein, putative
TcCLB.511269.20	Multisite-specific tRNA:(cytosine-C(5))-methyltransferase, putative
TcCLB.455721.9	cytochrome c oxidase subunit 10, putative
TcCLB.508141.80	hypothetical protein, conserved
TcCLB.504071.30	hypothetical protein, conserved
TcCLB.506573.70	hypothetical protein, conserved
TcCLB.508397.10	V-type proton ATPase subunit D, putative
TcCLB.506011.30	hypothetical protein, conserved
TcCLB.508651.20	cytochrome c oxidase subunit 10, putative
TcCLB.504021.100	hypothetical protein, conserved
TcCLB.511391.160	cytochrome c1, heme protein, mitochondrial, putative
TcCLB.506303.150	hypothetical protein, conserved
TcCLB.509795.10	hypothetical protein, conserved
TcCLB.511673.9	hypothetical protein, conserved
TcCLB.504161.20	hypothetical protein, conserved
TcCLB.508153.710	hypothetical protein
TcCLB.511237.100	hypothetical protein, conserved
TcCLB.507801.50	tubulin-tyrosine ligase, putative
TcCLB.508297.41	hypothetical protein, conserved
TcCLB.419833.10	vacuolar protein sorting 18, putative
TcCLB.510187.430	DNA mismatch repair protein MSH6, putative
TcCLB.510903.60	prenyltransferase, putative
TcCLB.508577.160	proteasome beta 6 subunit, putative
TcCLB.506559.460	hypothetical protein
TcCLB.504157.120	hypothetical protein, conserved
TcCLB.510329.130	UDP-glucose:glycoprotein glucosyltransferase
TcCLB.509985.60	hypothetical protein, conserved
TcCLB.509065.124	U6 snRNA-associated Sm-like protein LSm5p
TcCLB.510575.220	hypothetical protein, conserved
TcCLB.511649.150	phosphoglycerate mutase protein, putative
TcCLB.507675.30	hypothetical protein, conserved
TcCLB.511277.539	hypothetical protein, conserved
TcCLB.509793.69	hypothetical protein, conserved
TcCLB.506789.290	hypothetical protein, conserved
TcCLB.509799.30	adenylyl cyclase-associated protein, putative
TcCLB.506975.63	hypothetical protein, conserved
TcCLB.506573.40	hypothetical protein, conserved
TcCLB.508971.40	acetylornithine deacetylase-like, putative
TcCLB.510661.90	ATP-dependent RNA helicase, putative
TcCLB.508153.454	hypothetical protein, conserved
TcCLB.508045.14	hypothetical protein, conserved
TcCLB.511021.60	hypothetical protein, conserved
TcCLB.511003.30	RNA editing associated helicase 2, putative
TcCLB.509935.20	hypothetical protein, conserved
TcCLB.509671.20	hypothetical protein, conserved
TcCLB.505193.84	hypothetical protein, conserved
TcCLB.504741.170	dual specificity protein phosphatase, putative
TcCLB.508409.210	Hsc70-interacting protein, putative
TcCLB.510659.230	hypothetical protein, conserved
TcCLB.506727.50	hypothetical protein, conserved
TcCLB.453445.20	ubiquitin-conjugating enzyme E2, putative
TcCLB.504131.190	mitochondrial carrier protein, putative
TcCLB.506201.150	hypothetical protein, conserved
TcCLB.506959.40	enoyl-CoA hydratase/isomerase family protein, putative
TcCLB.508479.250	membrane-bound acid phosphatase 2, putative
TcCLB.510823.109	hypothetical protein, conserved
TcCLB.508405.50	hypothetical protein, conserved
TcCLB.510397.10	hypothetical protein, conserved
TcCLB.506315.70	hypothetical protein, conserved
TcCLB.507601.20	hypothetical protein, conserved
TcCLB.506581.30	eukaryotic translation initiation factor 3 subunit l
TcCLB.507059.60	orotidine-5-phosphate decarboxylase/orotate phosphoribosyltransferase, putative
TcCLB.511153.140	proteasome beta 3 subunit, putative
TcCLB.503603.20	hypothetical protein, conserved
TcCLB.507801.40	hypothetical protein, conserved
TcCLB.507017.104	hypothetical protein
TcCLB.508677.60	hypothetical protein
TcCLB.509733.10	hypothetical protein, conserved
TcCLB.510665.30	hypothetical protein, conserved
TcCLB.508177.129	cystathionine beta-synthase, putative
TcCLB.511245.24	hypothetical protein, conserved
TcCLB.506559.400	hypothetical protein, conserved
TcCLB.509857.50	hook complex protein, conserved
TcCLB.460127.20	CAAX prenyl protease 1, putative
TcCLB.508355.50	hypothetical protein, conserved
TcCLB.511237.110	cyclophilin, putative
TcCLB.510947.40	agmatinase, putative
TcCLB.509749.39	short-chain dehydrogenase, putative
TcCLB.511367.100	hypothetical protein, conserved
TcCLB.507519.100	hypothetical protein, conserved
TcCLB.507623.140	endonuclease G, putative
TcCLB.507061.34	hypothetical protein, conserved
TcCLB.508177.90	hypothetical protein, conserved
TcCLB.510359.180	hypothetical protein, conserved
TcCLB.511825.40	centrin-4, putative
TcCLB.508739.90	hypothetical protein, conserved
TcCLB.509163.110	retrotransposon hot spot (RHS) protein, putative
TcCLB.508177.110	cystathionine beta-synthase
TcCLB.508961.20	hypothetical protein, conserved
TcCLB.510901.100	DNA topoisomerase III, putative
TcCLB.511385.30	vacuolar-type proton translocating pyrophosphatase 1
TcCLB.508199.20	hypothetical protein, conserved
TcCLB.508409.280	hypothetical protein, conserved
TcCLB.503843.10	hypothetical protein, conserved
TcCLB.510121.190	hypothetical protein, conserved
TcCLB.510421.250	hypothetical protein, conserved
TcCLB.507601.170	histone H4, putative
TcCLB.509849.30	hypothetical protein
TcCLB.508405.80	Peptidase C50 separase, putative
TcCLB.508823.60	hypothetical protein, conserved
TcCLB.510303.40	hypothetical protein
TcCLB.508823.10	hypothetical protein, conserved
TcCLB.509053.130	DnaJ chaperone protein, putative
TcCLB.511367.129	hypothetical protein, conserved
TcCLB.510993.10	(H+)-ATPase G subunit
TcCLB.511383.70	hypothetical protein, conserved
TcCLB.507615.110	Engulfment and cell motility domain-containing protein
TcCLB.509695.40	hypothetical protein, conserved
TcCLB.508815.160	ER lumen retaining receptor protein, putative
TcCLB.510661.80	hypothetical protein
TcCLB.506871.100	polypeptide deformylase-like protein, putative
TcCLB.506435.110	hypothetical protein, conserved
TcCLB.504797.140	CLC-type chloride channel, putative
TcCLB.510329.80	hypothetical protein, conserved
TcCLB.508319.30	hypothetical protein, conserved
TcCLB.511859.170	NADH-cytochrome b5 reductase, putative
TcCLB.407335.9	phosphatidylserine decarboxylase, putative
TcCLB.508891.130	hypothetical protein, conserved
TcCLB.507159.30	hypothetical protein, conserved
TcCLB.506977.120	hypothetical protein, conserved
TcCLB.507787.140	hypothetical protein, conserved
TcCLB.508879.120	hypothetical protein, conserved
TcCLB.509859.50	hypothetical protein, conserved
TcCLB.507063.110	hypothetical protein, conserved
TcCLB.509719.53	hypothetical protein, conserved
TcCLB.506989.50	hypothetical protein, conserved
TcCLB.510679.40	hypothetical protein
TcCLB.508073.10	surface protease GP63, putative
TcCLB.511323.40	histone H2A variant Z
TcCLB.506789.260	hypothetical protein, conserved
TcCLB.511825.80	I/6 autoantigen, putative
TcCLB.508177.20	carbohydrate kinase, thermoresistant glucokinase, putative
TcCLB.503597.10	homoserine kinase
TcCLB.509331.221	hypothetical protein, conserved
TcCLB.503823.84	DNA-directed RNA polymerase I subunit, putative
TcCLB.424123.40	RNA-binding protein, putative
TcCLB.503809.75	hypothetical protein, conserved
TcCLB.507081.50	hypothetical protein, conserved
TcCLB.509945.20	hypothetical protein, conserved
TcCLB.507515.40	hypothetical protein, conserved
TcCLB.508299.70	peroxisome targeting signal 1 receptor, putative
TcCLB.508173.90	hypothetical protein, conserved
TcCLB.504741.240	hypothetical protein, conserved
TcCLB.506469.139	hypothetical protein, conserved
TcCLB.508257.140	Aquaporin 2
TcCLB.508175.100	hypothetical protein
TcCLB.507663.30	hypothetical protein, conserved
TcCLB.425969.9	cyclin-dependent kinases regulatory subunit, putative
TcCLB.503703.40	hypothetical protein, conserved
TcCLB.508817.10	hypothetical protein, conserved
TcCLB.506835.120	DNA ligase I, putative
TcCLB.508153.130	enoyl-CoA hydratase, mitochondrial precursor, putative
TcCLB.506989.20	hypothetical protein, conserved
TcCLB.510667.60	peptidyl-prolyl cis-trans isomerase (cyclophilin), putative
TcCLB.509601.70	V-type proton ATPase subunit a, putative
TcCLB.503785.30	hypothetical protein, conserved
TcCLB.508153.340	ATP-dependent 6-phosphofructokinase, glycosomal
TcCLB.508175.360	cystathionine beta-synthase
TcCLB.510421.270	hypothetical protein, conserved
TcCLB.503837.10	hypothetical protein, conserved
TcCLB.509571.10	hypothetical protein, conserved
TcCLB.510899.50	palmitoyl acyltransferase 4, putative
TcCLB.506435.20	hypothetical protein, conserved
TcCLB.511825.210	dephospho-CoA kinase, putative
TcCLB.510187.240	hypothetical protein, conserved
TcCLB.509789.40	hypothetical protein, conserved
TcCLB.506219.40	hypothetical protein, conserved
TcCLB.509799.60	hypothetical protein, conserved
TcCLB.511159.30	Present in the outer mitochondrial membrane proteome 15
TcCLB.506989.150	hypothetical protein, conserved
TcCLB.507681.70	hypothetical protein, conserved
TcCLB.506629.40	hypothetical protein, conserved
TcCLB.507801.19	dynein heavy chain, putative
TcCLB.507615.70	deoxyhypusine hydroxylase, putative
TcCLB.511153.100	RNA-binding protein, putative
TcCLB.510967.20	hypothetical protein, conserved
TcCLB.506999.170	hypothetical protein
TcCLB.509715.120	phosphatidylinositol-4-phosphate 5-kinase, putative
TcCLB.511465.30	hypothetical protein, conserved
TcCLB.509937.210	hypothetical protein, conserved
TcCLB.508273.70	hypothetical protein, conserved
TcCLB.510303.180	hypothetical protein, conserved
TcCLB.508577.140	cyclophilin, putative
TcCLB.506977.80	hypothetical protein, conserved
TcCLB.504253.10	hypothetical protein, conserved
TcCLB.510131.40	haloacid dehalogenase-like hydrolase, putative
TcCLB.511019.120	hypothetical protein, conserved
TcCLB.503727.29	hypothetical protein
TcCLB.509329.9	retrotransposon hot spot (RHS) protein, putative
TcCLB.506201.120	hypothetical protein, conserved
TcCLB.506425.40	hypothetical protein, conserved
TcCLB.508579.10	hypothetical protein, conserved
TcCLB.510657.40	hypothetical protein, conserved
TcCLB.508349.30	hypothetical protein, conserved
TcCLB.511249.10	ADP/ATP mitochondrial carrier protein, putative
TcCLB.508525.30	hypothetical protein, conserved
TcCLB.508851.59	ATP synthase, putative
TcCLB.506559.10	hypothetical protein
TcCLB.511821.110	translation initiation factor IF-2, putative
TcCLB.509875.204	hypothetical protein, conserved
TcCLB.508355.127	hypothetical protein, conserved
TcCLB.460127.30	amino acid permease, putative
TcCLB.509663.10	myosin heavy chain, putative
TcCLB.511511.159	zinc finger protein, putative
TcCLB.506905.50	cystathionine beta-synthase
TcCLB.511725.134	mitochondrial carrier protein, putative
TcCLB.508909.200	hypothetical protein
TcCLB.506709.20	hypothetical protein, conserved
TcCLB.506835.10	hypothetical protein, conserved
TcCLB.510421.220	hypothetical protein, conserved
TcCLB.504013.55	hypothetical protein, conserved
TcCLB.508815.80	hypothetical protein, conserved
TcCLB.509237.130	cytoskeleton-associated protein CAP5.5, putative
TcCLB.508405.90	soluble N-ethylmaleimide sensitive factor (NSF) attachment protein, putative
TcCLB.507601.150	histone H4, putative
TcCLB.509213.120	cytosolic nonspecific dipeptidase, putative
TcCLB.507897.20	squalene synthase, putative
TcCLB.504231.10	hypothetical protein, conserved
TcCLB.508173.84	hypothetical protein, conserved
TcCLB.506123.40	nucleolar RNA helicase II, putative
TcCLB.508441.80	Mitochondrial-processing peptidase subunit alpha
TcCLB.511257.10	DNAK protein, putative
TcCLB.508851.170	DNA topoisomerase III, putative
TcCLB.510007.70	ATP-dependent zinc metallopeptidase, putative
TcCLB.509539.30	fatty acid elongase, putative
TcCLB.507053.200	hypothetical protein, conserved
TcCLB.509915.60	retrotransposon hot spot (RHS) protein, putative
TcCLB.507663.40	hypothetical protein, conserved
TcCLB.511629.30	hypothetical protein, conserved
TcCLB.509793.10	kinetoplast-associated protein 4
TcCLB.511823.70	farnesyl pyrophosphate synthase
TcCLB.507031.80	hypothetical protein, conserved
TcCLB.511523.10	GTPase activating protein of Rab-like GTPase, putative
TcCLB.508177.120	cystathionine beta-synthase
TcCLB.507063.144	hypothetical protein, conserved
TcCLB.507569.10	hypothetical protein, conserved
TcCLB.507649.80	nucleolar RNA-binding protein, putative
TcCLB.507019.60	hypothetical protein, conserved
TcCLB.510421.80	hypothetical protein
TcCLB.510647.20	hypothetical protein, conserved
TcCLB.506469.40	hypothetical protein, conserved
TcCLB.507623.129	vacuolar type h+ ATPase subunit, putative
TcCLB.508457.30	lipoic acid containing carrier protein, putative
TcCLB.511207.10	hypothetical protein, conserved
TcCLB.509065.150	hypothetical protein, conserved
TcCLB.511229.39	hypothetical protein, conserved
TcCLB.508027.110	pyroglutamyl-peptidase I, putative
TcCLB.508355.40	choline/carnitine O-acetyltransferase, putative
TcCLB.505939.30	hypothetical protein, conserved
TcCLB.510825.10	hypothetical protein, conserved
TcCLB.508173.260	hypothetical protein, conserved
TcCLB.509749.10	Biotin--acetyl-CoA-carboxylase ligase, putative
TcCLB.506975.40	amidohydrolase, putative
TcCLB.511903.120	transketolase, putative
TcCLB.506921.20	hypothetical protein, conserved
TcCLB.503463.10	protein kinase C substrate protein, heavy chain, putative
TcCLB.505163.80	oligosaccharyl transferase subunit, putative
TcCLB.507723.100	cytochrome oxidase subunit IX, putative
TcCLB.509617.20	paraflagellar rod protein 3, putative
TcCLB.508741.170	glycerate kinase, putative
TcCLB.506337.160	NADH-ubiquinone oxidoreductase complex I subunit, putative
TcCLB.507943.40	histone H4, putative
TcCLB.509239.10	fatty acid desaturase, putative
TcCLB.504797.20	hypothetical protein, conserved
TcCLB.508857.160	threonine synthase, putative
TcCLB.510889.170	hypothetical protein, conserved
TcCLB.507943.5	histone H4, putative
TcCLB.509487.4	DNA-directed RNA polymerase III, putative
TcCLB.507081.20	hypothetical protein, conserved
TcCLB.426435.9	fatty acid desaturase, putative
TcCLB.508017.10	hypothetical protein, conserved
TcCLB.506559.450	hypothetical protein
TcCLB.510337.40	spermidine synthase, putative
TcCLB.506559.510	hypothetical protein, conserved
TcCLB.508153.760	hypothetical protein, conserved
TcCLB.503763.10	retrotransposon hot spot (RHS) protein, putative
TcCLB.509289.30	hypothetical protein, conserved
TcCLB.509509.50	hypothetical protein, conserved
TcCLB.511865.80	hypothetical protein, conserved
TcCLB.510889.205	hypothetical protein, conserved
TcCLB.507021.40	hypothetical protein, conserved
TcCLB.506789.120	hypothetical protein, conserved
TcCLB.510667.50	hypothetical protein, conserved
TcCLB.510359.270	mitochondrial RNA-binding protein 2, putative
TcCLB.506241.200	hypothetical protein, conserved
TcCLB.510329.270	Fumarate hydratase class I, cytosolic
TcCLB.508865.10	glutathione synthetase, putative
TcCLB.507601.160	histone H4, putative
TcCLB.509899.110	orotidine-5-phosphate decarboxylase/orotate phosphoribosyltransferase, putative
TcCLB.508677.80	NADP-dependent alcohol hydrogenase, putative
TcCLB.508443.60	hypothetical protein, conserved
TcCLB.510155.100	hypothetical protein
TcCLB.506977.60	hypothetical protein, conserved
TcCLB.511019.90	iron superoxide dismutase, putative
TcCLB.511507.60	hypothetical protein
TcCLB.507019.40	histidyl-tRNA synthetase
TcCLB.511233.40	hypothetical protein, conserved
TcCLB.511653.40	hypothetical protein, conserved
TcCLB.510901.60	Replication factor A protein 1
TcCLB.509671.10	hypothetical protein, conserved
TcCLB.508881.54	hypothetical protein, conserved
TcCLB.506559.380	centrin, putative
TcCLB.511725.100	phosphatidylinositol-4-phosphate 5-kinase, putative
TcCLB.507241.39	ABC transporter, putative
TcCLB.507681.90	hypothetical protein, conserved
TcCLB.506355.130	hypothetical protein, conserved
TcCLB.503681.9	hypothetical protein, conserved
TcCLB.508153.990	hypothetical protein, conserved
TcCLB.432867.20	hypothetical protein, conserved
TcCLB.507681.250	hypothetical protein, conserved
TcCLB.511283.200	hypothetical protein, conserved
TcCLB.509695.10	aspartyl-tRNA synthetase, putative
TcCLB.509047.40	hypothetical protein, conserved
TcCLB.509717.100	membrane-bound acid phosphatase 2, putative
TcCLB.508707.110	hypothetical protein, conserved
TcCLB.503913.10	hypothetical protein, conserved
TcCLB.511165.50	PA domain containing protein, putative
TcCLB.503465.49	mitochondrial processing peptidase, beta subunit, putative
TcCLB.508153.810	hypothetical protein, conserved
TcCLB.511909.40	Succinate dehydrogenase [ubiquinone] flavoprotein subunit, mitochondrial
TcCLB.511459.50	hypothetical protein, conserved
TcCLB.506839.70	NADH dehydrogenase, putative
TcCLB.511301.70	FK506-binding protein (FKBP)-type peptidyl-prolyl isomerase, putative
TcCLB.510339.50	spermidine synthase, putative
TcCLB.509859.40	cytosolic leucyl aminopeptidase, putative
TcCLB.509601.20	hypothetical protein, conserved
TcCLB.503687.30	hypothetical protein, conserved
TcCLB.510899.59	hypothetical protein, conserved
TcCLB.506297.240	protein transport protein SEC61 subunit alpha, putative
TcCLB.509471.95	histone H3, putative
TcCLB.510187.280	hypothetical protein, conserved
TcCLB.506507.10	N-acetylglucosamine-6-phosphate deacetylase-like protein, putative
TcCLB.508461.84	hypothetical protein
TcCLB.503929.10	V-type ATPase, A subunit, putative
TcCLB.504141.9	calcium-translocating P-type ATPase, putative
TcCLB.509105.130	ATP-binding cassette sub-family F member 1, putative
TcCLB.506247.400	hypothetical protein, conserved
TcCLB.506559.200	thioredoxin, putative
TcCLB.508909.270	hypothetical protein, conserved
TcCLB.509331.210	NADP-dependent alcohol hydrogenase, putative
TcCLB.507663.60	hypothetical protein, conserved
TcCLB.511277.70	Elongation factor Tu, mitochondrial, putative
TcCLB.503721.39	heat shock 70 kDa protein, putative
TcCLB.507681.60	hypothetical protein, conserved
TcCLB.504079.6	selenophosphate synthetase, putative
TcCLB.510355.269	cytochrome b5, putative
TcCLB.511847.50	hypothetical protein, conserved
TcCLB.506583.30	ubiquitin-like protein, putative
TcCLB.509795.40	Mechanosensitive ion channel MscS, putative
TcCLB.506485.80	oxidoreductase, putative
TcCLB.504105.140	enolase
TcCLB.506629.220	isovaleryl-coA dehydrogenase, putative
TcCLB.507951.280	ABC transporter, putative
TcCLB.507049.100	mitochondrial RNA binding protein, putative
TcCLB.509611.30	hypothetical protein
TcCLB.507021.60	p1/s1 nuclease, putative
TcCLB.507823.20	hypothetical protein
TcCLB.508817.80	protein kinase, putative
TcCLB.511209.10	Vacuolar proton pump subunit B, putative
TcCLB.503563.10	calcium-translocating P-type ATPase, putative
TcCLB.506201.100	hypothetical protein, conserved
TcCLB.508153.920	choline/ethanolamine phosphotransferase, putative
TcCLB.505183.100	hypothetical protein, conserved
TcCLB.504575.15	ubiquinol-cytochrome-C-reductase, putative
TcCLB.510943.20	hypothetical protein
TcCLB.504069.80	ATP synthase F1 subunit gamma protein, putative
TcCLB.511245.140	fatty acid elongase, putative
TcCLB.506297.280	hypothetical protein, conserved
TcCLB.503565.10	hypothetical protein
TcCLB.507053.40	hypothetical protein, conserved
TcCLB.510823.80	cytoplasmic l-asparaginase i-like protein, putative
TcCLB.504045.114	hypothetical protein, conserved
TcCLB.425785.18	hypothetical protein, conserved
TcCLB.510359.170	AAA ATPase, putative
TcCLB.474937.9	acetyl-CoA carboxylase
TcCLB.509505.10	protein disulfide isomerase, putative
TcCLB.509429.310	hypothetical protein, conserved
TcCLB.506443.60	hypothetical protein
TcCLB.507717.20	hypothetical protein
TcCLB.508153.1040	hypothetical protein, conserved
TcCLB.508737.100	ATP-dependent Clp protease subunit, heat shock protein 78, putative
TcCLB.511755.19	hypothetical protein, conserved
TcCLB.508299.20	hypothetical protein, conserved
TcCLB.507765.149	hypothetical protein, conserved
TcCLB.508355.210	hypothetical protein, conserved
TcCLB.508981.20	hypothetical protein, conserved
TcCLB.506999.90	rieske iron-sulfur protein, mitochondrial precursor, putative
TcCLB.506727.90	enoyl-CoA hydratase/isomerase family protein, putative
TcCLB.508479.213	hypothetical protein, conserved
TcCLB.510299.10	hypothetical protein, conserved
TcCLB.508459.18	phosphatidylserine decarboxylase, putative
TcCLB.510669.9	hypothetical protein, conserved
TcCLB.508821.50	vacuolar type h+ ATPase subunit, putative
TcCLB.507053.170	hypothetical protein, conserved
TcCLB.505171.60	hypothetical protein, conserved
TcCLB.507517.30	hypothetical protein, conserved
TcCLB.511301.44	hypothetical protein, conserved
TcCLB.506321.280	hypothetical protein, conserved
TcCLB.506295.100	hypothetical protein, conserved
TcCLB.507541.20	hypothetical protein, conserved
TcCLB.506977.70	ATPase subunit 9, putative
TcCLB.509733.170	Valosin-containing protein, putative
TcCLB.509229.80	mitochondrial processing peptidase alpha subunit, putative
TcCLB.503681.20	ethanolamine phosphotransferase, putative
TcCLB.510445.40	hypothetical protein
TcCLB.509647.120	hypothetical protein
TcCLB.511391.180	Golgi/lysosome glycoprotein 1, putative
TcCLB.507943.30	histone H4, putative
TcCLB.509937.150	serine hydroxymethyltransferase, putative
TcCLB.507053.20	hypothetical protein, conserved
TcCLB.509437.70	hypothetical protein, conserved
TcCLB.509717.80	glyceraldehyde 3-phosphate dehydrogenase, cytosolic, putative
TcCLB.510435.20	hypothetical protein, conserved
TcCLB.511021.51	hypothetical protein, conserved
TcCLB.505163.30	hypothetical protein, conserved
TcCLB.506201.110	hypothetical protein, conserved
TcCLB.511837.80	hypothetical protein, conserved
TcCLB.504021.60	hypothetical protein, conserved
TcCLB.506629.50	hypothetical protein, conserved
TcCLB.510187.320	hypothetical protein
TcCLB.509319.40	hypothetical protein, conserved
TcCLB.508301.20	mitochondrial processing peptidase, beta subunit, putative
TcCLB.511907.50	lysophospholipase, putative
TcCLB.506247.210	hypothetical protein, conserved
TcCLB.511515.40	heat shock 70 kDa protein, mitochondrial precursor, putative
TcCLB.509799.90	hypothetical protein, conserved
TcCLB.511903.290	hypothetical protein, conserved
TcCLB.508911.50	fructosamine kinase, putative
TcCLB.511003.130	hypothetical protein, conserved
TcCLB.453445.10	hypothetical protein, conserved
TcCLB.511807.256	hypothetical protein, conserved
TcCLB.510689.30	proteasome beta 7 subunit, putative
TcCLB.506235.20	guide RNA associated protein 1, putative
TcCLB.507943.20	histone H4, putative
TcCLB.507519.164	hypothetical protein, conserved
TcCLB.507943.10	histone H4, putative
TcCLB.508799.170	3-methylcrotonoyl-CoA carboxylase beta subunit, putative
TcCLB.511389.40	hypothetical protein, conserved
TcCLB.510421.130	mitochondrial RNA binding complex 1 subunit, putative
TcCLB.507057.30	arginine N-methyltransferase, type I
TcCLB.506297.260	Lanosterol 14-alpha demethylase
TcCLB.509471.30	hypothetical protein, conserved
TcCLB.510437.40	cytosolic malate dehydrogenase, putative
TcCLB.508503.20	cytochrome c oxidase subunit V, putative
TcCLB.511717.80	DNA repair and recombination helicase protein PIF4, putative
TcCLB.511719.10	phosphatidylinositol 3-related kinase, putative
TcCLB.511827.30	hypothetical protein
TcCLB.509795.20	hypothetical protein, conserved
TcCLB.507897.40	acetyl-CoA carboxylase, putative
TcCLB.506957.130	hypothetical protein, conserved
TcCLB.507665.30	ferric reductase transmembrane protein, putative
TcCLB.506621.60	acyl-CoA binding protein, putative
TcCLB.508413.5	hypothetical protein, conserved
TcCLB.507063.260	hypothetical protein
TcCLB.506435.460	hypothetical protein
TcCLB.509463.30	3-ketoacyl-CoA thiolase, putative
TcCLB.509033.80	hypothetical protein, conserved
TcCLB.509229.130	hypothetical protein, conserved
TcCLB.507023.150	hypothetical protein
TcCLB.503583.60	hypothetical protein
TcCLB.509611.170	hypothetical protein, conserved
TcCLB.509461.90	inositol 1,4,5-trisphosphate receptor, putative
TcCLB.507061.30	iron superoxide dismutase A, mitochondrial
TcCLB.506679.60	hypothetical protein, conserved
TcCLB.507777.20	hypothetical protein, conserved
TcCLB.504131.180	ATPase subunit 9, putative
TcCLB.503917.14	hypothetical protein, conserved
TcCLB.509109.120	protein tyrosine phosphatase, putative
TcCLB.511239.110	hypothetical protein, conserved
TcCLB.510039.64	hypothetical protein, conserved
TcCLB.510395.10	ATP synthase F1, alpha subunit, putative
TcCLB.508815.120	hypothetical protein, conserved
TcCLB.509161.140	hypothetical protein, conserved
TcCLB.509601.100	hypothetical protein, conserved
TcCLB.510155.20	KREL1
TcCLB.508461.140	poly(A)-binding protein, putative
TcCLB.510519.110	hypothetical protein
TcCLB.506959.60	hypothetical protein, conserved
TcCLB.508693.80	ruvB-like DNA helicase, putative
TcCLB.507029.30	heat shock 70 kDa protein, mitochondrial precursor, putative
TcCLB.511249.44	vacuolar transporter chaperone, putative
TcCLB.509611.100	lipoate-protein ligase, putative
TcCLB.506819.10	hypothetical protein, conserved
TcCLB.504933.30	hypothetical protein
TcCLB.510339.80	hypothetical protein, conserved
TcCLB.506421.10	retrotransposon hot spot (RHS) protein, putative
TcCLB.509561.70	hypothetical protein, conserved
TcCLB.511655.20	hypothetical protein, conserved
TcCLB.510065.30	translationally controlled tumor protein (TCTP), putative
TcCLB.506175.10	hypothetical protein, conserved
TcCLB.506835.40	hypothetical protein, conserved
TcCLB.509461.60	mitochondrial RNA binding protein, putative
TcCLB.510187.70	tyrosine aminotransferase, putative
TcCLB.506725.20	hypothetical protein, conserved
TcCLB.506295.130	prohibitin, putative
TcCLB.506443.40	Mitochondrial pyruvate carrier 2
TcCLB.507991.40	hypothetical protein
TcCLB.508409.110	hypothetical protein, conserved
TcCLB.508637.140	hypothetical protein, conserved
TcCLB.511291.120	DNA-directed RNA polymerase III subunit C11, putative
TcCLB.509109.130	protein tyrosine phosphatase-like protein, putative
TcCLB.508823.90	hypothetical protein
TcCLB.511719.30	hypothetical protein, conserved
TcCLB.504949.30	succinate dehydrogenase iron-sulfur subunit
TcCLB.509509.20	C-1-tetrahydrofolate synthase, cytoplasmic, putative
TcCLB.507017.4	hypothetical protein, conserved
TcCLB.511229.70	hypothetical protein, conserved
TcCLB.506727.40	hypothetical protein, conserved
TcCLB.504105.150	importin beta-1 subunit, putative
TcCLB.510187.60	glyceraldehyde 3-phosphate dehydrogenase, cytosolic, putative
TcCLB.503939.20	hypothetical protein, conserved
TcCLB.508741.229	Mitochondrial outer membrane protein porin, putative
TcCLB.511895.69	C-5 sterol desaturase, putative
TcCLB.510945.30	actin, putative
TcCLB.509059.50	pyridoxal kinase, putative
TcCLB.504131.140	hypothetical protein, conserved
TcCLB.422921.20	50S ribosomal protein L17, putative
TcCLB.503815.29	hypothetical protein, conserved
TcCLB.510339.74	mitochondrial carrier protein, putative
TcCLB.506619.10	sedoheptulose-1,7-bisphosphatase, putative
TcCLB.509873.10	retrotransposon hot spot (RHS) protein, putative
TcCLB.507513.110	hypothetical protein
TcCLB.511021.90	hypothetical protein
TcCLB.509179.20	Macro domain containing protein, putative
TcCLB.511815.40	guide RNA associated protein, GAP2, putative
TcCLB.511277.150	hypothetical protein
TcCLB.509065.120	hypothetical protein
TcCLB.508851.180	14-3-3 protein 1, putative
TcCLB.510667.80	hypothetical protein, conserved
TcCLB.508891.60	serine/threonine protein phosphatase, putative
TcCLB.505939.10	hypothetical protein
TcCLB.508479.180	hypothetical protein, conserved
TcCLB.506959.64	3-keto-dihydrosphingosine reductase
TcCLB.431357.10	3,2-trans-enoyl-CoA isomerase, mitochondrial precursor, putative
TcCLB.508707.310	leucine rich repeat protein, putative
TcCLB.506975.9	REL2, putative
TcCLB.503465.30	Iron-sulfur assembly protein 2, putative
TcCLB.509045.20	co-chaperone GrpE, putative
TcCLB.510301.20	fructose-bisphosphate aldolase, glycosomal, putative
TcCLB.507913.30	proliferative cell nuclear antigen (PCNA), putative
TcCLB.508909.214	hypothetical protein, conserved
TcCLB.506123.10	major vault protein, putative
TcCLB.509795.89	phosphoprotein lepp12, putative
TcCLB.510339.54	hypothetical protein, conserved
TcCLB.507583.40	hypothetical protein, conserved
TcCLB.506559.370	hypothetical protein, conserved
TcCLB.506177.100	actyltransferase-like, putative
TcCLB.510121.100	hypothetical protein
TcCLB.508737.210	Mitochondrial outer membrane protein porin, putative
TcCLB.507951.170	ADP-ribosylation factor-like protein 3, putative
TcCLB.507951.114	High mobility group protein TDP1
TcCLB.508257.10	serine-palmitoyl-CoA transferase, putative
TcCLB.509541.19	major vault protein, putative
TcCLB.507951.80	Present in the outer mitochondrial membrane proteome 25
TcCLB.510265.10	quinone oxidoreductase, putative
TcCLB.511755.10	hypothetical protein, conserved
TcCLB.510355.220	GDP-mannose transporter, putative
TcCLB.510889.10	hypothetical protein, conserved
TcCLB.507705.30	hypothetical protein, conserved
TcCLB.510187.290	ATP-dependent DEAD/H RNA helicase, putative
TcCLB.509875.260	hypothetical protein, conserved
TcCLB.511279.60	hypothetical protein, conserved
TcCLB.506559.350	asparaginyl-tRNA synthetase, putative
TcCLB.506297.10	hypothetical protein
TcCLB.503735.20	hypothetical protein
TcCLB.509235.20	C-5 sterol desaturase, putative
TcCLB.508907.10	hypothetical protein, conserved
TcCLB.510667.10	hypothetical protein, conserved
TcCLB.506443.70	glutathione-S-transferase/glutaredoxin, putative
TcCLB.511151.100	Unconventional myosin
TcCLB.510821.60	ribonucleoprotein p18, mitochondrial precursor, putative
TcCLB.508899.140	hypothetical protein
TcCLB.511025.110	dihydrolipoyl dehydrogenase, putative
TcCLB.511893.10	ribonuclease inhibitor, putative
TcCLB.507645.59	hypothetical protein, conserved
TcCLB.508479.340	succinyl-CoA synthetase alpha subunit, putative
TcCLB.510301.10	fructose-bisphosphate aldolase, glycosomal, putative
TcCLB.507583.70	ribonuclease inhibitor, putative
TcCLB.505999.90	phosphoglycerate kinase, putative
TcCLB.508693.50	amidinotransferase, putative
TcCLB.508901.10	hypothetical protein, conserved
TcCLB.508153.1020	hypothetical protein, conserved
TcCLB.508899.54	hypothetical protein, conserved
TcCLB.509179.70	hypothetical protein, conserved
TcCLB.506581.10	dolicholphosphate-mannose synthase
TcCLB.506585.80	hypothetical protein, conserved
TcCLB.510121.40	hypothetical protein
TcCLB.508173.100	Monooxygenase, putative
TcCLB.506585.40	glucose-regulated protein 78, putative
TcCLB.508707.200	Nucleoside diphosphate kinase 1
TcCLB.507583.30	hypothetical protein
TcCLB.509717.90	short chain 3-hydroxyacyl-CoA dehydrogenase, putative
TcCLB.507081.130	2,4-dihydroxyhept-2-ene-1,7-dioic acid aldolase, putative
TcCLB.506629.30	guide RNA-binding protein of 21 kDa
TcCLB.503603.10	mitochondrial RNA binding complex 1 subunit, putative
TcCLB.509045.29	kinesin, putative
TcCLB.507031.64	hypothetical protein, conserved
TcCLB.510889.140	alanine aminotransferase, putative
TcCLB.509051.40	adenosine kinase, putative
TcCLB.510889.231	ATP synthase subunit, putative
TcCLB.510819.30	hypothetical protein
TcCLB.510889.120	alanine aminotransferase, putative
TcCLB.508741.220	hypothetical protein
TcCLB.508153.60	Aminopeptidase M1, putative
TcCLB.511237.10	thimet oligopeptidase, putative
TcCLB.506301.40	hypothetical protein, conserved
TcCLB.509643.70	Archaic translocase of outer membrane 11 kDa subunit, putative
TcCLB.504797.80	endo-beta-N-acetylglucosaminidase, putative
TcCLB.506831.40	3-hydroxy-3-methylglutaryl-CoA reductase
TcCLB.467287.30	ATPase beta subunit, putative
TcCLB.509047.10	hypothetical protein
TcCLB.511807.64	DNA repair protein, putative
TcCLB.510663.70	6-phosphogluconate dehydrogenase, decarboxylating, putative
TcCLB.510421.320	pyruvate dehydrogenase E1 beta subunit, putative
TcCLB.507517.60	ATPase subunit 9, putative
TcCLB.504161.50	hypothetical protein, conserved
TcCLB.510647.30	tryptophanyl-tRNA synthetase, putative
TcCLB.508707.40	hypothetical protein, conserved
TcCLB.511165.54	pterin-4-alpha-carbinolamine dehydratase, putative
TcCLB.506989.100	Triple RNA binding domain protein 3
TcCLB.506229.30	hypothetical protein
TcCLB.506263.20	D-isomer specific 2-hydroxyacid dehydrogenase-protein, putative
TcCLB.511283.184	hypothetical protein, conserved
TcCLB.509179.100	L-galactonolactone oxidase
TcCLB.511167.90	14-3-3 protein 2, putative
TcCLB.511827.50	hypothetical protein
TcCLB.508175.90	hypothetical protein
TcCLB.510885.30	hypothetical protein
TcCLB.507849.50	cysteine proteinase, putative
TcCLB.509505.40	hypothetical protein, conserved
TcCLB.507609.60	inositol-3-phosphate synthase, putative
TcCLB.509207.90	pyrroline-5-carboxylate reductase, putative
TcCLB.506855.350	hypothetical protein
TcCLB.509063.30	chaperonin HSP60/CNP60, putative
TcCLB.504109.140	DNA-directed RNA polymerase I subunit, putative
TcCLB.508799.240	metallo-peptidase, Clan MF, Family M17
TcCLB.511031.10	hypothetical protein, conserved
TcCLB.506247.220	histidine ammonia-lyase, putative
TcCLB.509429.120	Mitochondrial SSU ribosomal protein 29, putative
TcCLB.508909.20	GMP reductase
TcCLB.508175.370	glutamine synthetase, putative
TcCLB.507023.20	hypothetical protein
TcCLB.509733.100	translation elongation factor 1-beta, putative
TcCLB.450161.10	cation transporter, putative
TcCLB.510439.50	hypothetical protein, conserved
TcCLB.504071.40	hypothetical protein
TcCLB.503929.79	serine-palmitoyl-CoA transferase, putative
TcCLB.506705.50	hypothetical protein
TcCLB.506559.410	hypothetical protein, conserved
TcCLB.504001.20	hypothetical protein, conserved
TcCLB.508153.164	hypothetical protein, conserved
TcCLB.508821.40	hypothetical protein, conserved
TcCLB.506263.10	D-isomer specific 2-hydroxyacid dehydrogenase-protein, putative
TcCLB.510571.30	actin 1, putative
TcCLB.509065.60	glyceraldehyde 3-phosphate dehydrogenase, putative
TcCLB.511287.49	aldo-keto reductase
TcCLB.506727.100	enoyl-CoA hydratase/isomerase family protein, putative
TcCLB.509065.70	glyceraldehyde 3-phosphate dehydrogenase, putative
TcCLB.511903.40	3-hydroxy-3-methylglutaryl-CoA synthase, putative
TcCLB.509945.24	hypothetical protein, conserved
TcCLB.503999.10	squalene monooxygenase, putative
TcCLB.511635.40	protein tyrosine phosphatase, putative
TcCLB.511289.70	Mitochondrial ADP/ATP carrier protein 5, putative
TcCLB.506297.190	pyruvate phosphate dikinase, putative
TcCLB.507767.10	succinyl-CoA ligase [GDP-forming] beta-chain, putative
TcCLB.507681.20	succinyl-CoA ligase [GDP-forming] beta-chain, putative
TcCLB.509215.40	peptidyl-prolyl cis-trans isomerase, putative
TcCLB.508177.70	hypothetical protein
TcCLB.508577.70	hypothetical protein
TcCLB.503555.30	trypanothione reductase, putative
TcCLB.506145.30	O-6 methyl-guanine alkyl transferase, putative
TcCLB.511229.50	S-adenosylhomocysteine hydrolase, putative
TcCLB.509237.10	mevalonate kinase, putative
TcCLB.506201.39	25 kDa translation elongation factor 1-beta, putative
TcCLB.506789.280	methylthioadenosine phosphorylase, putative
TcCLB.504045.60	thermostable carboxypeptidase 2, putative
TcCLB.508501.250	UMP-CMP kinase, mitochondrial, putative
TcCLB.509337.19	Mitochondrial pyruvate carrier 1
TcCLB.508479.370	hypothetical protein, conserved
TcCLB.510725.40	hypothetical protein, conserved

## Sheet: 9 Pt-dppf-mpo down
9 elements included exclusively in diferentially expressed genes in Pt-dppf-mpo
Gene ID	Description
TcCLB.509733.110	hypothetical protein, conserved
TcCLB.506583.10	U2 small nuclear ribonucleoprotein 16.5K, putative
TcCLB.508269.30	translation initiation factor 2 subunit, putative
TcCLB.507053.180	hypothetical protein, conserved
TcCLB.509213.100	3-ketoacyl-CoA reductase, putative
TcCLB.511289.30	metallo-peptidase, Clan MG, Family M24
TcCLB.508815.70	hypothetical protein, conserved
TcCLB.510423.40	hypothetical protein, conserved
TcCLB.508153.1100	mitochondrial protein 99, putative
