# Supplementary material for: Comparative high-throughput analysis of the Trypanosoma cruzi response to organometallic compounds
Source: Royal Society of Chemistry journal article supplement (doi:10.1039/d0mt00030b), 2020-03-24
Supplement: d0mt00030b6.xlsx [file d0mt00030b6.xlsx]

## Sheet: Hoja1
Over- and underrepresented proteins after Pd-dppf-mpo treatment (2107 total detected proteins)
Soluble proteins (180)	Over (55)	Unique treated (31)	Insoluble proteins (162)	Over (73)	Unique treated (41)
		Augmented (24)			Augmented (32)
	Sub (125)	Unique control (94)		Sub (89)	Unique control (74)
		Diminished (31)			Diminished -1,5 (15)
Over- and underrepresented proteins after Pt-dppf-mpo treatment (1823 total detected proteins)
Soluble proteins (314)	Over (96)	Unique treated (35)	Insoluble proteins (97)	Over (80)	Unique treated (63)
		Augmented (61)			Augmented (17)
	Sub (218)	Unique control (167)		Sub (17)	Unique control (17)
		Diminished (51)			Diminished (0)
