# Supplementary material for: Comparative high-throughput analysis of the Trypanosoma cruzi response to organometallic compounds
Source: Royal Society of Chemistry journal article supplement (doi:10.1039/d0mt00030b), 2020-03-24
Supplement: d0mt00030b7.xlsx [file d0mt00030b7.xlsx]

## Sheet: Pd-dppf-mpo sol prot detected
Pd-dppf-mpo soluble protein detected
Gene ID	Uniprot ID	Fold Change	pValue	Description
#Identifications satisfied both, the automatic fold and statistical criteria.
TcCLB.504069.53	Q4DAW0	2.78833	0.000577341	Proteasome subunit alpha type
TcCLB.511145.43	Q4D1H4	2.65989	0.0010497	Proteasome subunit alpha type
TcCLB.503479.30	Q4D6Z4	2.49892	0.0216475	Adenylate kinase, putative
TcCLB.510431.250	Q4DXW9	2.38784	0.031463	Phosphoribosylpyrophosphate synthetase, putative
TcCLB.506485.80	Q4DAS0	2.25682	0.00235499	Oxidoreductase, putative
TcCLB.510669.20	Q4CR48	2.24631	0.0275408	Gim5A protein, putative
TcCLB.510755.120	Q4D7Y1	2.19002	0.0234767	RNA-binding protein, putative
TcCLB.509153.90	Q4DLS1	2.17707	0.00616873	Bifunctional dihydrofolate reductase-thymidylate synthase
TcCLB.509317.60	Q4D488	2.17205	0.00502707	RNA-binding protein, putative
TcCLB.506195.290	Q4DXJ7	2.09016	0.0376787	Uncharacterized protein
TcCLB.511229.110	Q4D449	2.09004	0.00459354	Glycyl-tRNA synthetase, putative
TcCLB.508207.70	Q4DVM9	2.06311	0.0477231	Adenine phosphoribosyltransferase, putative
TcCLB.511621.50	Q4DT61	2.02988	0.00996136	RNA-binding protein, putative
TcCLB.508805.80	Q4D5D5	1.95807	0.0159495	Short chain dehydrogenase, putative
TcCLB.510039.40	Q4D9K8	1.90447	0.0369473	Nitrilase, putative
TcCLB.510105.240	Q4DZT0	1.854	0.0372543	Short chain 3-hydroxyacyl-coa dehydrogenase, putative
TcCLB.511575.60	Q4DG65	1.84727	0.0126999	Isocitrate dehydrogenase [NADP]
TcCLB.507447.19	Q4CMT2	1.80127	0.00454983	Microtubule-associated protein, putative (Fragment)
TcCLB.511181.50	Q4DPR3	1.79778	0.0117574	Mitochondrial processingptidase, beta subunit, putative
TcCLB.509749.10	Q4CPE2	1.74418	0.0373157	Biotin/lipoate protein ligase, putative
TcCLB.506885.350	Q4E4G8	1.74025	0.02684	Proteasome subunit alpha type
TcCLB.511383.50	Q4D8I7	1.73209	0.004257	Prohibitin, putative
TcCLB.509141.40	Q4CSK6	1.58423	0.00181978	Uncharacterized protein
TcCLB.508293.90	Q4DLA7	1.4501	0.00959751	Elongation factor 1-gamma (EF-1-gamma), putative
TcCLB.506263.20	Q4CU51	-1.41218	0.00902222	D-isomer specific 2-hydroxyacid dehydrogenase-protein, putative
TcCLB.510381.10	Q4CYV4	-1.56797	0.00543655	Cystathionine beta-synthase, putative
TcCLB.510801.10	Q4CNG5	-1.5954	0.00571831	Calpain-like cysteineptidase, putative (Fragment)
TcCLB.509219.20	Q4CXQ1	-1.60271	0.0223231	Retrotransposon hot spot (RHS) protein, putative
TcCLB.508461.140	Q4E4V0	-1.6461	0.00312086	Polyadenylate-binding protein
TcCLB.511385.30	Q4DKH4	-1.65327	0.00151331	Vacuolar-type proton translocating pyrophosphatase 1, putative
TcCLB.511691.20	Q4CRW9	-1.66392	0.00749245	Cystathionine beta-synthase
TcCLB.508177.110	Q4DF38	-1.71879	0.00759829	Cystathionine beta-synthase
TcCLB.507529.50	Q4D234	-1.7395	0.0152562	Uncharacterized protein
TcCLB.503721.39	Q4CWF4	-1.76851	0.0334368	Heat shock 70 kDa protein, putative (Fragment)
TcCLB.510105.170	Q4DZT8	-1.78104	0.0138268	Acetyltransferase component of pyruvate dehydrogenase complex
TcCLB.506135.9	Q4DAZ6	-1.80794	0.0219559	Heat shock 70 kDa protein, putative (Fragment)
TcCLB.509717.20	Q4DMG9	-1.82057	0.033844	Acetyltransferase component of pyruvate dehydrogenase complex
TcCLB.509247.30	Q4D6H3	-1.85197	0.0339942	Uncharacterized protein
TcCLB.510307.220	Q4E0N0	-1.85216	0.0419838	Retrotransposon hot spot (RHS) protein, putative
TcCLB.511277.70	Q4E5I8	-1.9296	0.0255284	Elongation factor TU, putative
TcCLB.506595.149	Q4DLB9	-1.93151	0.0366806	Retrotransposon hot spot (RHS) protein, putative (Fragment)
TcCLB.509761.10	Q4CP43	-1.9326	0.0410133	Uncharacterized protein (Fragment)
TcCLB.510879.50	Q4DJX8	-2.0708	0.0483107	Regulatory subunit of protein kinase a-like protein, putative
TcCLB.508675.29	Q4D066	-2.10512	0.0262418	Calpain-like cysteineptidase, putative
TcCLB.511391.120	Q4DU62	-2.14126	0.00205033	Glutamamyl carboxypeptidase, putative
TcCLB.511237.10	Q4D7D2	-2.17303	0.0281716	Thimet oligopeptidase, putative
TcCLB.506411.10	Q4CVA3	-2.23468	0.0213078	Thimet oligopeptidase, putative
TcCLB.507711.200	Q4DZQ8	-2.25494	0.0411864	Uncharacterized protein
TcCLB.508153.60	Q4E686	-2.47066	0.0260538	Aminopeptidase
TcCLB.507167.240	Q4DYV8	-2.49252	0.0391093	Retrotransposon hot spot (RHS) protein, putative
TcCLB.511903.120	Q4DU82	-2.61458	0.0165876	Transketolase
TcCLB.509247.50	Q4D6H2	-2.70382	0.0223778	Methionyl-tRNA synthetase, putative
TcCLB.506357.130	Q4DY15	-2.8874	0.0300274	Uncharacterized protein
TcCLB.511667.20	Q4DNM2	-3.15886	0.00995558	Retrotransposon hot spot (RHS) protein, putative
TcCLB.504089.60	Q4DE55	-5.78857	0.00754469	Uncharacterized protein
#These identifications satisfied the fold criteria but, most likely, this happened by chance (should be disconsidered).
TcCLB.511421.60	Q4DWQ6	5.5265	0.00078342	Deoxyhypusine synthase, putative
TcCLB.504113.20	Q4CQI9	5.14549	0.000846043	MYH7B protein, putative
TcCLB.508355.150	Q4E3B3	4.5805	0.00131718	Proteasome regulatory non-ATPase subunit 3, putative
TcCLB.508301.20	Q4CNA4	3.32236	0.0666143	Mitochondrial processingptidase, beta subunit, putative (Fragment)
TcCLB.506659.30	Q4D526	2.94759	0.0538491	Glutathione synthetase
TcCLB.511303.34	Q4DSL4	2.7921	0.0523395	Uncharacterized protein
TcCLB.510121.70	Q4DQ22	2.77373	0.130973	Uncharacterized protein
TcCLB.508397.10	Q4D3E6	2.4296	0.0769121	Vacuolar ATP synthase, putative
TcCLB.509805.60	Q4E002	2.38877	0.0549737	Ras-related protein rab-5, putative
TcCLB.509429.100	Q4E0M0	2.31956	0.082125	Uncharacterized protein
TcCLB.511469.70	Q4DCI5	2.28107	0.0572914	Prohibitin, putative
TcCLB.506227.150	Q4DSV5	2.27872	0.100165	Protein kinase A regulatory subunit, putative
TcCLB.508503.20	Q4D214	2.18347	0.0960439	Cytochrome c oxidase subunit V, putative
TcCLB.507951.160	Q4DUS2	2.15169	0.111342	Uncharacterized protein
TcCLB.510719.60	Q4DXV2	2.10756	0.0941455	Biotin/lipoate protein ligase, putative
TcCLB.507615.19	Q4DN34	2.05776	0.0890366	Microtubule-associated protein Gb4, putative (Fragment)
TcCLB.510759.120	Q4DS82	2.04165	0.0645992	Reiske iron-sulfur protein, putative
TcCLB.510687.120	Q4D9X5	1.9836	0.076914	H/ACA ribonucleoprotein complex subunit
TcCLB.511827.100	Q4DQB0	1.94491	0.0683209	Cysteineptidase C (CPC), putative
TcCLB.508899.54	Q4DMP7	1.92689	0.0530937	Uncharacterized protein
TcCLB.511237.110	Q4D7C3	1.90566	0.0610635	Peptidyl-prolyl cis-trans isomerase
TcCLB.511643.30	Q4DEI9	1.88921	0.0584601	Aspartate carbamoyltransferase, putative
TcCLB.503959.78	Q4D3D1	1.8695	0.0512255	Uncharacterized protein (Fragment)
TcCLB.504099.10	Q4DBD1	-1.85077	0.0587051	Retrotransposon hot spot (RHS) protein, putative
TcCLB.511371.10	Q4CUE7	-1.88102	0.0570982	Retrotransposon hot spot (RHS) protein, putative
TcCLB.506507.10	Q4CZT5	-1.88634	0.0677727	N-acetylglucosamine-6-phosphate deacetylase-like protein, putative (Fragment)
TcCLB.509647.13	Q4DPB6	-1.88891	0.0734423	Uncharacterized protein (Fragment)
TcCLB.506697.80	Q4D391	-1.93234	0.0667531	Uncharacterized protein (Fragment)
TcCLB.505763.19	Q4CQ52	-1.94484	0.066034	Plasma membrane ATPase (Fragment)
TcCLB.509161.60	Q4DBB6	-1.95222	0.0561681	Uncharacterized protein
TcCLB.511365.70	Q4D9Z1	-1.96679	0.0836929	Proteasome regulatory non-ATPase subunit, putative
TcCLB.506959.120	Q4DIC9	-1.97863	0.0636233	60S ribosomal protein L30, putative
TcCLB.506241.100	Q4DU35	-1.9836	0.0555349	60S ribosomal protein L32, putative
TcCLB.506815.30	Q4CV82	-2.03981	0.0751053	Coatomer subunit beta'
TcCLB.508827.139	Q4DK33	-2.04933	0.105386	Coatomer gamma subunit, putative (Fragment)
TcCLB.504013.60	Q4D6P2	-2.05016	0.0549971	Regulatory subunit of protein kinase a-like protein, putative
TcCLB.506857.90	Q4D9J1	-2.05732	0.0838636	Proteasome regulatory ATPase subunit 1, putative
TcCLB.510769.90	Q4DST7	-2.08799	0.0518149	60S ribosomal protein L32, putative
TcCLB.511647.4	Q4D6X8	-2.10711	0.0806034	Glutamine-dependent carbamoyl-phosphate synthetase, putative (Fragment)
TcCLB.507681.210	Q4DW33	-2.12814	0.0764998	Uncharacterized protein
TcCLB.511707.39	Q4CS64	-2.13339	0.154176	Uncharacterized protein (Fragment)
TcCLB.507253.10	Q4CYJ8	-2.19508	0.0696036	Retrotransposon hot spot (RHS) protein, putative
TcCLB.509671.10	Q4DK03	-2.26282	0.142514	Uncharacterized protein
TcCLB.508827.40	Q4DK44	-2.2671	0.0950204	Acyl-CoA dehydrogenase, putative
TcCLB.507809.110	Q4DSS0	-2.31949	0.0919442	Uncharacterized protein
TcCLB.510479.11	Q4CN13	-2.35639	0.0850019	Retrotransposon hot spot (RHS) protein, putative (Fragment)
TcCLB.510101.40	Q4E3Q3	-2.41392	0.0671015	60S ribosomal protein L28, putative
TcCLB.510299.10	Q4CZK7	-2.42681	0.0969517	Uncharacterized protein
TcCLB.509401.30	Q4CMU6	-2.47136	0.0675813	Cysteineptidase, putative
TcCLB.508637.90	Q4DLI9	-2.55317	0.0650509	Phosphoglucomutase, putative
TcCLB.504057.40	Q4DSF3	-2.58091	0.0576797	Uncharacterized protein
TcCLB.511389.150	Q4DIT6	-2.60345	0.101902	Thiolase protein-like protein, putative
TcCLB.508175.146	Q4E2Y1	-2.63565	0.0700102	60S ribosomal protein L23a, putative
TcCLB.506579.10	Q4DAY6	-2.7233	0.0805151	ABC transporter, putative
TcCLB.506145.40	Q4DAC4	-2.7622	0.12408	Uncharacterized protein
TcCLB.508739.90	Q4DNH1	-2.85747	0.0709952	Uncharacterized protein
TcCLB.508475.10	Q4D6H7	-2.98878	0.101422	Ribosomal protein S20, putative
TcCLB.508457.30	Q4CS26	-3.00491	0.0931034	Glycine cleavage system H protein, putative
TcCLB.509683.10	Q4DLU4	-3.13454	0.0570686	Uncharacterized protein
TcCLB.509583.4	Q4CPG4	-3.23682	0.0595553	60S ribosomal protein L44, putative (Fragment)
TcCLB.510649.24	Q4CR38	-3.26017	0.0510665	Membrane associated protein, putative (Fragment)
TcCLB.445281.9	Q4CKH9	-3.31207	0.0610505	Calpain-like cysteineptidase, putative (Fragment)
TcCLB.510911.10	Q4CZF5	-5.4505	0.00130251	Profilin
#These identifications did not meet the fold and p-value criteria. (should be disconsidered)
TcCLB.508799.80	Q4DZK7	2.10644	0.189174	Uncharacterized protein
TcCLB.507519.140	Q4DNZ4	2.05419	0.202645	Adenine phosphoribosyltransferase, putative
TcCLB.508799.190	Q4DZJ6	2.03945	0.20084	Uncharacterized protein
TcCLB.509627.30	Q4CYA0	1.98372	0.150248	Proteasome regulatory non-ATPase subunit 11, putative
TcCLB.511287.150	Q4DIZ5	1.93305	0.185822	Fibrillarin, putative
TcCLB.509649.30	Q4CYA6	1.91134	0.187049	Proteasome regulatory non-ATPase subunit 8, putative
TcCLB.511277.170	Q4E5H7	1.91118	0.0839369	ATP-dependent zinc metallopeptidase, putative
TcCLB.509063.30	Q4CPH5	1.87283	0.160306	Chaperonin HSP60/CNP60, putative (Fragment)
TcCLB.511469.100	Q4DCI2	1.87165	0.145792	2-oxoisovalerate dehydrogenase beta subunit, mitochondrial, putative
TcCLB.507793.20	Q4CS97	1.86291	0.123477	Cysteine synthase, putative
TcCLB.504741.240	Q4DTS0	1.86043	0.0981861	Uncharacterized protein
TcCLB.510739.19	Q4CM88	1.85988	0.117765	Cystathione gamma lyase, putative (Fragment)
TcCLB.507021.110	Q4DB42	1.84369	0.162208	Uncharacterized protein
TcCLB.503733.70	Q4DA33	1.83777	0.117775	Phosphoacetylglucosamine mutase, putative
TcCLB.506529.250	Q4E5Q6	1.82891	0.195026	Uncharacterized protein
TcCLB.503855.60	Q4DBH2	1.82724	0.227584	Uncharacterized protein
TcCLB.511733.100	Q4D6Q5	1.81437	0.0715774	Uncharacterized protein
TcCLB.509553.40	Q4D0A9	1.80752	0.183376	Ribonuclease mar1, putative
TcCLB.503891.100	Q4CU77	1.80035	0.0666289	Proteasome beta 2 subunit, putative
TcCLB.507677.50	Q4DQL2	1.78229	0.164823	Uncharacterized protein
pfk	Q4E657	1.77674	0.0993521	ATP-dependent 6-phosphofructokinase
TcCLB.510657.30	Q4DS34	1.77656	0.123736	Phosphoinositide-binding protein, putative
TcCLB.508781.110	Q4DB65	1.7545	0.0820758	2-oxoisovalerate dehydrogenase alpha subunit, putative
TcCLB.510265.10	Q4DHH8	1.75415	0.231551	Quinone oxidoreductase, putative
TcCLB.503419.50	Q4CZ27	1.7498	0.092742	RNA-binding protein RGGm, putative
TcCLB.510351.90	Q4D8Z1	1.74369	0.0690457	Dihydrolipoamide acetyltransferase component of pyruvate dehydrogenase complex
TcCLB.510105.50	Q4DZU7	1.72904	0.105101	Fibrillarin, putative
TcCLB.507091.50	Q4DGV1	1.72608	0.0477024	Aspartate carbamoyltransferase, putative
TcCLB.511421.50	Q4DWQ7	1.71446	0.147962	Uncharacterized protein
TcCLB.509671.180	Q4DJY4	1.70651	0.108254	Uncharacterized protein
TcCLB.508277.160	Q4E0Y0	1.70364	0.247202	Glutaminyl-tRNA synthetase, putative
TcCLB.506435.410	Q4E301	1.70272	0.0838293	Uracil phosphoribosyltransferase, putative
TcCLB.505647.40	Q4CQG3	1.6999	0.0677764	Endoribonuclease L-PSP (Pb5), putative
TcCLB.504069.80	Q4DAV6	1.69171	0.167476	ATP synthase F1 subunit gamma protein, putative
TcCLB.509717.90	Q4DMG1	1.68918	0.059625	Short chain 3-hydroxyacyl-coa dehydrogenase, putative
TcCLB.503945.40	Q4CQA8	1.68583	0.0515402	6-phosphogluconolactonase, putative
TcCLB.511809.90	Q4DGZ9	1.67581	0.164021	Uncharacterized protein
TcCLB.506359.60	Q4D2U8	1.67398	0.116987	UTP-glucose-1-phosphate uridylyltransferase 2, putative
TcCLB.510509.50	Q4CVB9	1.64296	0.149282	Mitochondrial RNA binding protein, putative (Fragment)
TcCLB.508173.129	Q4DV73	1.64153	0.212819	Uncharacterized protein
TcCLB.507519.150	Q4DNZ3	1.64143	0.11548	Adenine phosphoribosyltransferase, putative
TcCLB.506857.20	Q4D9J8	1.63779	0.0719087	Pyrroline-5-carboxylate reductase
TcCLB.508307.170	Q4DRX6	1.63718	0.124054	Ribosome assembly factor mrt4
TcCLB.511323.40	Q4CY73	1.62299	0.0563276	Histone H2A
TcCLB.509769.80	Q4DKU5	1.61675	0.1567	Uncharacterized protein
TcCLB.509461.60	Q4DBM0	1.61282	0.09426	Mitochondrial RNA binding protein, putative
TcCLB.507259.10	Q4CM56	1.61107	0.0939043	Tryparedoxinroxidase, putative
TcCLB.504421.19	Q4CR23	1.60863	0.104614	Uncharacterized protein
TcCLB.511815.40	Q4DJA1	1.60013	0.0656332	Uncharacterized protein
TcCLB.510149.120	Q4DHQ3	1.59459	0.248203	Flagellar radial spoke protein-like, putative
TcCLB.509023.10	Q4DRP5	1.58777	0.163399	Uncharacterized protein
TcCLB.505843.24	Q4CVH2	1.58187	0.175587	Succinate dehydrogenase, putative
TcCLB.511731.10	Q4D7G6	1.55631	0.039469	UV excision repair RAD23-like protein, putative
TcCLB.508197.20	Q4CNF3	1.5532	0.155676	ADP-ribosylation factor, putative
TcCLB.509153.120	Q4DLR8	1.54434	0.217452	Acyl-CoA dehydrogenase, putative
TcCLB.508699.40	Q4DE50	1.53627	0.138428	Eukaryotic translation initiation factor 3 subunit E
TcCLB.510855.10	Q4CSX7	1.52797	0.178838	Peptide methionine sulfoxide reductase, putative
TcCLB.509167.150	Q4DQQ2	1.52763	0.0718228	Homoserine kinase, putative
TcCLB.506853.50	Q4D184	1.5194	0.0365095	2-oxoisovalerate dehydrogenase alpha subunit, putative
TcCLB.508651.20	Q4CLQ9	1.51252	0.265804	Cytochrome c oxidase subunit 10, putative
TcCLB.508461.270	Q4E4T4	1.50635	0.037795	Rab7 GTP binding protein, putative
TcCLB.506525.20	Q4DK31	1.50498	0.346282	Protein transport protein sec13, putative
TcCLB.507925.40	Q4D360	1.50101	0.0168355	Pyridoxal kinase, putative
TcCLB.506563.210	Q4DQN5	1.49872	0.202698	Calpain-like cysteineptidase, putative
TcCLB.509207.90	Q4DH60	1.49695	0.090705	Pyrroline-5-carboxylate reductase
TcCLB.508415.50	Q4CQM4	1.48833	0.0167549	ADP-ribosylation factor 1, putative
TcCLB.510155.70	Q4E0G9	1.48364	0.271399	Heat shock protein 70 (HSP70), putative
TcCLB.506559.200	Q4E5B1	1.48019	0.267284	Thioredoxin, putative
TcCLB.507547.30	Q4D8W3	1.47953	0.105371	Mitochondrial processingptidase alpha subunit, putative
TcCLB.508461.10	Q4E4W4	1.47657	0.307832	Uncharacterized protein
TcCLB.506679.140	Q4E088	1.47641	0.0383714	40S ribosomal protein S10, putative
TcCLB.506239.40	Q4D029	1.47539	0.261125	Uncharacterized protein
TcCLB.506925.300	Q4E4L9	1.46596	0.0381048	Peptidyl-prolyl cis-trans isomerase
TcCLB.511809.130	Q4DGZ5	1.46451	0.0165	40S ribosomal protein S15, putative
TcCLB.507691.50	Q4DD28	1.46315	0.300578	Retrotransposon hot spot (RHS) protein, putative
TcCLB.509261.30	Q4CTQ3	1.46006	0.0653492	3,2-trans-enoyl-CoA isomerase, mitochondrial, putative
TcCLB.506211.70	Q4DYL1	1.45512	0.171413	RNA-binding protein, putative
TcCLB.508577.160	Q4DPB7	1.45432	0.0442918	Proteasome subunit beta type
TcCLB.506221.50	Q4D8N0	1.45428	0.164577	Coatomer epsilon subunit, putative
TcCLB.511761.60	Q4D8E8	1.45177	0.100496	Uncharacterized protein
TcCLB.509925.70	Q4D8D4	1.4511	0.165646	Dispersed gene family protein 1 (DGF-1), putative
TcCLB.506777.80	Q4DC68	1.45036	0.0507763	Seryl-tRNA synthetase, putative
TcCLB.506625.240	Q4DUB8	1.44807	0.0977626	Uncharacterized protein
PA45-B	Q868H8	1.44619	0.0862413	Proline racemase B
TcCLB.510609.20	Q4DJN0	1.44478	0.0796674	Uncharacterized protein
TcCLB.509229.80	Q4DI18	1.44403	0.307994	Mitochondrial processingptidase alpha subunit, putative
TcCLB.508177.90	Q4DF40	1.44243	0.13003	Uncharacterized protein
TcCLB.506163.50	Q4D734	1.44172	0.11277	Uncharacterized protein
TcCLB.508175.100	Q4E2Y4	1.43922	0.124629	Uncharacterized protein
TcCLB.510759.80	Q4DS86	1.43419	0.310227	Uncharacterized protein
TcCLB.508919.140	Q4DL69	1.4336	0.208181	Uncharacterized protein
TcCLB.510353.10	Q4CUM2	1.43148	0.0126796	Major vault protein
TcCLB.511391.200	Q4DU56	1.42942	0.293891	Pitrilysin-like metalloprotease, putative
TcCLB.506775.80	Q4DRH6	1.42717	0.071941	14-3-3 protein, putative
TcCLB.504217.10	Q4CP08	1.42435	0.209134	Coatomer epsilon subunit, putative
TcCLB.504013.100	Q4D6N9	1.42433	0.087036	Ribosomal protein S19, putative
TcCLB.511303.150	Q4DSK1	1.42357	0.0916113	Uncharacterized protein
TcCLB.511261.160	Q4DL16	1.42222	0.128407	Pyruvate dehydrogenase E1 component alpha subunit, putative (Fragment)
TcCLB.509059.50	Q4D946	1.41942	0.017317	Pyridoxal kinase, putative
TcCLB.508821.40	Q4CXI6	1.41792	0.11484	Uncharacterized protein
TcCLB.509057.20	Q4CNH7	1.41543	0.0781101	Importin subunit alpha
TcCLB.505183.20	Q4DJ69	1.40659	0.0423885	Malic enzyme
TcCLB.508693.50	Q4DTV8	1.40286	0.0158627	Uncharacterized protein
TcCLB.509395.100	Q4DJQ7	1.40214	0.251502	Cytochrome b-domain protein, putative
TcCLB.506985.30	Q4D144	1.39932	0.239006	Proteasome subunit alpha type
TcCLB.511907.50	Q4DY82	1.39736	0.0854271	Lysophospholipase, putative
TcCLB.504069.10	Q4DAW6	1.39507	0.183018	Proteasome subunit alpha type
TcCLB.511727.50	Q4DY53	1.39039	0.116601	Uncharacterized protein
TcCLB.506211.200	Q4DYJ8	1.38078	0.178112	Aminopeptidase, putative
TcCLB.511025.50	Q4DD39	1.37974	0.0350746	Glucosamine-6-phosphate isomerase
TcCLB.509611.20	Q4DKA4	1.37715	0.24904	Peptidyl-prolyl cis-trans isomerase
TcCLB.506833.60	Q4CYX4	1.37704	0.0483206	UV excision repair RAD23-like protein, putative
TcCLB.511183.140	Q4E5L0	1.37659	0.317075	Dispersed gene family protein 1 (DGF-1), putative
TcCLB.510957.9	Q4CL00	1.37433	0.154764	Calpain-like cysteineptidase, putative (Fragment)
TcCLB.508541.220	Q4DN97	1.37332	0.299567	Casein kinase, putative
TcCLB.511583.40	Q4CVF7	1.37256	0.151747	Tricarboxylate carrier, putative
TcCLB.509831.36	Q4D0R4	1.3678	0.0164959	Mitochondrial RNA binding protein 1, putative
TcCLB.510573.10	Q4CLA9	1.35634	0.0603979	Actin, putative (Fragment)
TcCLB.508601.100	Q4DBQ1	1.35375	0.304359	Uncharacterized protein
TcCLB.510241.50	Q4DD50	1.35367	0.0616667	60S ribosomal protein L10, putative
TcCLB.507811.60	Q4DDN8	1.35258	0.12758	Vesicle-associated membrane protein, putative
TcCLB.508501.250	Q4DUU1	1.34741	0.135092	Uncharacterized protein
TcCLB.511145.60	Q4D1H0	1.34546	0.299391	ATP synthase F1 subunit gamma protein, putative
TcCLB.508185.10	Q4CKX1	1.34352	0.260973	Enoyl-CoA hydratase, mitochondrial, putative
TcCLB.506859.20	Q4DVH1	1.34345	0.0386705	Proteasome regulatory ATPase subunit 5, putative
TcCLB.508347.130	Q4DSX1	1.34208	0.09057	Deoxyhypusine hydroxylase
TcCLB.504213.120	Q4DIK4	1.34208	0.287699	Proteasome subunit alpha type
TcCLB.505989.82	Q4D5M2	1.34034	0.235031	RuvB-like helicase
TcCLB.509505.40	Q4D001	1.33813	0.33349	Uncharacterized protein
TcCLB.503823.160	Q4DLG3	1.33692	0.310247	2-methoxy-6-polyprenyl-1,4-benzoquinol methylase, mitochondrial
TcCLB.511579.9	Q4CLK5	1.33545	0.33765	Fatty acyl CoA syntetase 1, putative (Fragment)
TcCLB.506755.260	Q4DWJ0	1.33539	0.0290362	Mitochondrial RNA-binding protein 2, putative
TcCLB.511287.110	Q4DJ00	1.33307	0.344678	Uncharacterized protein
TcCLB.507639.30	Q4D6T7	1.33052	0.0595576	Universal minicircle sequence binding protein (UMSBP)
TcCLB.507515.4	Q4DJ87	1.32845	0.0836617	Glutathioneroxidase (Fragment)
TcCLB.505931.50	Q4CWE9	1.32273	0.0864853	Histone H3, putative
TcCLB.506859.90	Q4DVG6	1.31487	0.0899774	Prefoldin, putative
TcCLB.508321.21	Q4CYH8	1.31416	0.144033	Histone H2A
TcCLB.510187.20	Q4E4E9	1.31332	0.26609	Tyrosine aminotransferase, putative
TcCLB.511529.160	Q4DMX9	1.30693	0.175845	3-hydroxyisobutyryl-CoA hydrolase, mitochondrial
TcCLB.510091.80	Q4DB91	1.30587	0.216708	Pyruvate dehydrogenase E1 beta subunit, putative
TcCLB.511003.60	Q4DNU4	1.30356	0.34091	Uncharacterized protein
TcCLB.510945.10	Q4D1R0	1.29894	0.335898	Ubiquitin carboxyl-terminal hydrolase
TcCLB.504433.10	Q4D2I4	1.29765	0.113755	ADP-ribosylation factor 3, putative
TcCLB.506337.70	Q4DKY2	1.29532	0.230464	2-oxoglutarate dehydrogenase E1 component, putative
TcCLB.506367.30	Q4DFX2	1.29259	0.100243	Uncharacterized protein
TcCLB.511367.138	Q4DYH7	1.29042	0.348174	Chaperone DnaJ protein, putative
TcCLB.506563.40	Q4DQP2	1.28971	0.124217	Tubulin beta chain
TcCLB.509631.140	Q4DSZ8	1.2889	0.300083	Uncharacterized protein
TcCLB.506201.170	Q4DG71	1.2886	0.3282	Uncharacterized protein (Fragment)
TcCLB.507569.10	Q4CTC8	1.28665	0.191055	Uncharacterized protein
TcCLB.511289.30	Q4DD17	1.28638	0.226961	Aminopeptidase, putative
TcCLB.505997.60	Q4DWB1	1.28476	0.332142	Retrotransposon hot spot (RHS) protein, putative
TcCLB.506355.50	Q4DKC8	1.28204	0.312931	Chaperone DnaJ protein, putative
TcCLB.511407.60	Q4D7V7	1.28172	0.294405	Small GTP-binding protein Rab11, putative
TcCLB.511167.90	Q4DHC9	1.27952	0.0916248	14-3-3 protein, putative
TcCLB.511585.190	Q4E162	1.27933	0.0311866	Probable eukaryotic initiation factor 4A
TcCLB.506211.60	Q4DYL2	1.27805	0.0253013	RNA-binding protein, putative
TcCLB.508173.40	Q4DV84	1.27561	0.0243146	Mercaptopyruvate sulfurtransferase, putative
TcCLB.507305.30	Q4CQE5	1.27433	0.344102	Casein kinase, putative
TcCLB.506425.169	Q4DM40	1.26978	0.2901	Ras-related protein rab-2a, putative (Fragment)
TcCLB.509237.10	Q4DJT8	1.26757	0.0935576	Mevalonate kinase
TcCLB.507053.170	Q4DTI8	1.26717	0.335968	Uncharacterized protein
TcCLB.510187.70	Q4E4E4	1.26708	0.178922	Tyrosine aminotransferase, putative
TcCLB.503945.10	Q4CQB1	1.2666	0.110447	Eukaryotic translation initiation factor 1A, putative (Fragment)
TcCLB.511807.190	Q4E1C6	1.26513	0.378624	Uncharacterized protein
TcCLB.511209.10	Q4CXR7	1.26396	0.107769	Vacuolar ATP synthase subunit B, putative
TcCLB.506195.110	Q4DXL5	1.26105	0.13753	Malate dehydrogenase
TcCLB.510187.60	Q4E4E5	1.2585	0.0427309	Glyceraldehyde-3-phosphate dehydrogenase
TcCLB.507923.10	Q4CU39	1.25633	0.103696	L-threonine 3-dehydrogenase, putative
TcCLB.507615.70	Q4DN31	1.25481	0.230621	Deoxyhypusine hydroxylase
TcCLB.507603.40	Q4DW25	1.25319	0.33431	Proteasome subunit beta type
TcCLB.504003.60	Q4D1L5	1.25118	0.0161291	T-complex protein 1 subunit gamma
TcCLB.509003.10	Q4CW66	1.24883	0.315294	Uncharacterized protein
TcCLB.506513.110	Q4DPI6	1.24791	0.179334	Peptidase T, putative
TcCLB.510889.50	Q4E2P2	1.24325	0.20834	Cytochrome C oxidase subunit IV, putative
TcCLB.506529.360	Q4E5P5	1.24263	0.19676	Cytochrome C oxidase subunit IV, putative
TcCLB.510339.50	Q4DA73	1.24011	0.0380979	Spermidine synthase, putative
TcCLB.508625.130	Q4DBR3	1.23826	0.0856841	Stress-inducible protein STI1-like, putative
TcCLB.509001.40	Q4CV42	1.23612	0.210509	Calpain-like cysteineptidase, putative
TcCLB.507077.50	Q4CW73	1.23564	0.280187	Uncharacterized protein
TcCLB.503935.20	Q4CNP4	1.23461	0.0867949	2-oxoglutarate dehydrogenase, E2 component, dihydrolipoamide succinyltransferase, putative
TcCLB.503841.10	Q4D086	1.23112	0.0106712	Proteasome activator protein PA26, putative (Fragment)
TcCLB.507639.20	Q4D6T8	1.2307	0.0527394	Universal minicircle sequence binding protein (UMSBP), putative
TcCLB.503943.14	Q4CS08	1.22996	0.305734	Uncharacterized protein
TcCLB.507241.30	Q4CWA5	1.22502	0.0054057	Arginine kinase, putative
TcCLB.510755.129	Q4D7Y0	1.22481	0.291447	60S ribosomal protein L12, putative
TcCLB.511287.49	Q4DJ07	1.2243	0.026887	Prostaglandin F synthase
TcCLB.507603.200	Q4DW08	1.22429	0.11541	Proteasome regulatory ATPase subunit 3, putative
TcCLB.511043.30	Q4CXG2	1.22296	0.343244	DnaJ chaperone protein, putative
TcCLB.506247.230	Q4E132	1.22126	0.279753	Prolyl oligopeptidase, putative
TcCLB.509233.180	Q4DTX7	1.21564	0.208855	ATP synthase subunit beta
TcCLB.511163.10	Q4CW46	1.21131	0.215139	Seryl-tRNA synthetase, putative (Fragment)
TcCLB.510163.20	Q4CXW2	1.2106	0.0112112	Elongation factor 1-gamma (EF-1-gamma), putative
TcCLB.410923.20	Q4CS11	1.20917	0.320696	Retrotransposon hot spot (RHS) protein, putative
TcCLB.510689.50	Q4D577	1.20747	0.369595	Cell differentiation protein, putative
TcCLB.507927.20	Q4D590	1.20737	0.393796	Mitochondrial oligo_U binding protein TBRGG1, putative
TcCLB.510993.10	Q4CNF9	1.20534	0.33522	V-type proton ATPase subunit G
TcCLB.506679.100	Q4E093	1.20317	0.218276	40S ribosomal protein S18, putative
TcCLB.510817.60	Q4CYG8	1.20173	0.375182	Uncharacterized protein
TcCLB.409117.20	Q4D6I5	1.20127	0.0910174	40S ribosomal protein S14, putative
TcCLB.509627.40	Q4CY99	1.20126	0.373597	Uncharacterized protein
TcCLB.503781.90	Q4D8U5	1.20123	0.17451	Universal minicircle sequence binding protein (UMSBP), putative
TcCLB.506629.200	Q4DQC4	1.19744	0.153906	Uncharacterized protein
EIF6	Q4E097	1.19544	0.145058	Eukaryotic translation initiation factor 6
TcCLB.510717.30	Q4CTE8	1.19406	0.26803	2-oxoglutarate dehydrogenase E1 component, putative
TcCLB.508999.190	Q4E0D8	1.19385	0.287462	Calpain-like cysteineptidase, putative
TcCLB.511277.160	Q4E5H8	1.19329	0.146503	Ribosomal protein
TcCLB.511217.140	Q4DVC7	1.19097	0.377323	Coatomer subunit delta
TcCLB.508461.80	Q4E4V7	1.1909	0.0614984	Prostaglandin F2alpha synthase
TcCLB.510183.20	Q4CX66	1.1871	0.397811	Dipeptidyl-peptidase 8-like serineptidase, putative
TcCLB.436521.9	Q4CLD0	1.1857	0.075853	Mevalonate kinase (Fragment)
TcCLB.510821.60	Q4CZG5	1.17975	0.230403	Ribonucleoprotein p18, mitochondrial, putative
TcCLB.508209.140	Q4DFA6	1.17847	0.335988	Protein disulfide isomerase, putative
TcCLB.504203.40	Q4CX49	1.1781	0.385208	Uncharacterized protein
TcCLB.511407.10	Q4D7W2	1.17781	0.36926	Nuclear transport factor 2, putative
TcCLB.511635.20	Q4CTD7	1.17721	0.155541	Histone H2B
TcCLB.508441.10	Q4DB82	1.17693	0.314165	NUP-1 protein, putative (Fragment)
TcCLB.511465.10	Q4CPR5	1.17662	0.152906	Proteasome activator protein PA26, putative
TcCLB.510579.70	Q4D9L7	1.17656	0.263739	Nascent polypeptide associated complex subunit, putative
TcCLB.508827.70	Q4DK40	1.17398	0.326127	40S ribosomal protein S17, putative
TcCLB.504423.30	Q4CYL3	1.17006	0.313579	Uncharacterized protein
TcCLB.508677.80	Q4DEF3	1.16701	0.261133	NADP-dependent alcohol hydrogenase, putative
TcCLB.508387.20	Q4DQ97	1.16615	0.197311	Purine nucleoside phosphorylase
TcCLB.507709.50	Q4DIV9	1.1657	0.0511582	60S ribosomal protein L6, putative
TcCLB.503555.30	Q4CT43	1.16562	0.114526	Trypanothione reductase, putative
TcCLB.506885.14	Q4DXW6	1.16485	0.167898	Ribosomal protein L37
TcCLB.508851.180	Q4DJB6	1.16392	0.0854922	14-3-3 protein, putative
TcCLB.508349.39	Q4CXT3	1.16354	0.249235	RNA-binding protein, putative (Fragment)
TcCLB.509877.30	Q4CYZ1	1.16286	0.417589	Guanine nucleotide-binding protein beta subunit-like protein, putative
TcCLB.506825.200	Q4DZE3	1.15984	0.348684	Uncharacterized protein
TcCLB.507093.220	Q4E1N5	1.1586	0.242334	RNA-binding protein, putative
TcCLB.508299.60	Q4D5K2	1.15708	0.194418	60S ribosomal protein L2, putative
TcCLB.511559.20	Q4CZB7	1.15409	0.289622	Uncharacterized protein
TcCLB.510947.10	Q4CU94	1.1525	0.226695	Mannose-1-phosphate guanyltransferase, putative
TcCLB.508535.50	Q4CYW7	1.14779	0.218923	Tyrosine aminotransferase
TcCLB.509801.30	Q4CVJ5	1.14725	0.208924	Citrate synthase
TcCLB.506559.410	Q4E589	1.14666	0.156084	Uncharacterized protein
TcCLB.506945.160	Q4CSC4	1.14078	0.242679	S-adenosylmethionine synthase
TcCLB.411235.9	Q4CLA1	1.13935	0.114693	Tubulin alpha chain
TcCLB.509049.40	Q4CTB4	1.13918	0.246332	Uncharacterized protein
TcCLB.508543.30	Q4DSJ7	1.13716	0.256241	40S ribosomal protein S9, putative
TcCLB.510821.50	Q4CZG6	1.13655	0.290112	Replication Factor A 28 kDa subunit, putative
TcCLB.508323.100	Q4DFL2	1.12969	0.312996	I/6 autoantigen, putative
TcCLB.506247.210	Q4E134	1.12943	0.376228	Uncharacterized protein
TcCLB.510571.30	Q4CYQ8	1.12626	0.178491	Actin, putative
TcCLB.506421.10	Q4CLI9	1.12548	0.345361	Retrotransposon hot spot (RHS) protein, putative (Fragment)
TcCLB.506213.80	Q4DC23	1.12468	0.394802	60S ribosomal protein L17, putative
TcCLB.508355.330	Q4E396	1.11997	0.281587	Uncharacterized protein
TcCLB.509229.110	Q4DI16	1.11953	0.427526	Uncharacterized protein
TcCLB.506649.80	Q4DE30	1.11936	0.288713	RNA-binding protein, putative
TcCLB.508625.10	Q4DBS3	1.11564	0.233113	Elongation factor 2, putative (Fragment)
TcCLB.511453.10	Q4CY82	1.11514	0.437133	Dispersed gene family protein 1 (DGF-1), putative (Fragment)
TcCLB.508807.10	Q4CLP1	1.10986	0.343146	ATP-dependent Clp protease subunit, heat shock protein 100, putative (Fragment)
TcCLB.511367.220	Q4DYH1	1.10561	0.274137	Uncharacterized protein
TcCLB.506025.60	Q4D1R9	1.10432	0.284777	2-oxoglutarate dehydrogenase, E2 component, dihydrolipoamide succinyltransferase, putative
TcCLB.503521.50	Q4D297	1.10161	0.426496	UTP-glucose-1-phosphate uridylyltransferase 2, putative
TcCLB.509109.120	Q4DQM4	1.10112	0.369652	Protein tyrosine phosphatase, putative
TcCLB.504163.50	Q4D4R9	1.10106	0.262957	Fructose-bisphosphate aldolase
TcCLB.508601.119	Q4DBP9	1.09878	0.335848	Ribose 5-phosphate isomerase, putative
TcCLB.511293.69	Q4DDK8	1.09846	0.390673	Glycosomal malate dehydrogenase, putative
TcCLB.510945.70	Q4D1Q4	1.09775	0.264469	Aspartate aminotransferase, mitochondrial, putative
TcCLB.508573.39	Q4D858	1.09768	0.432119	Dispersed gene family protein 1 (DGF-1), putative (Fragment)
TcCLB.508469.4	Q4CW07	1.0974	0.445862	Uncharacterized protein (Fragment)
TcCLB.506789.280	Q4DZW1	1.0972	0.304339	Purine nucleoside phosphorylase
TcCLB.508989.9	Q4DAD9	1.09608	0.2036	Nucleoside phosphorylase, putative (Fragment)
TcCLB.509583.10	Q4CPG3	1.09528	0.20525	Chaperonin TCP20, putative
TcCLB.506779.50	Q4DHA9	1.09149	0.224154	Proteasome beta 3 subunit, putative
TcCLB.508799.240	Q4DZJ3	1.08913	0.389956	Aminopeptidase, putative
TcCLB.511289.14	Q4DD18	1.08883	0.449121	Protein kinase, putative (Fragment)
TcCLB.510353.30	Q4CUM0	1.08834	0.45794	Paraflagellar rod component Par4, putative
TcCLB.509569.100	Q4DKS7	1.08759	0.373301	Nucleoside phosphorylase, putative
TcCLB.504021.109	Q4DMK9	1.08712	0.280202	40S ribosomal protein S3, putative
TcCLB.511291.90	Q4DC38	1.08696	0.197385	40S ribosomal protein S13, putative
TcCLB.509125.20	Q4CRW0	1.08691	0.416163	ATP-dependent Clp protease subunit, heat shock protein 78, putative (Fragment)
TcCLB.509915.60	Q4DKH6	1.08627	0.372413	Retrotransposon hot spot (RHS) protein, putative
TcCLB.507835.70	Q4DDX7	1.08618	0.452283	Dispersed gene family protein 1 (DGF-1), putative
TcCLB.511729.60	Q4CVX7	1.08368	0.344231	Uncharacterized protein
TcCLB.511277.110	Q4E5I4	1.08347	0.348898	Citrate synthase
TcCLB.511755.60	Q4DJ49	1.08228	0.454046	ATP-dependent RNA helicase, putative
TcCLB.510323.40	G3XCP0	1.08196	0.460173	Heat shock protein 20, putative
TcCLB.504427.250	Q4DYM1	1.08089	0.382064	Ubiquitin-activating enzyme E1, putative
TcCLB.506189.10	Q4CNK1	1.07902	0.447475	Nucleolar protein, putative (Fragment)
TcCLB.506937.10	Q4CTR7	1.07833	0.329038	Malate dehydrogenase
TcCLB.509895.10	Q4DCY3	1.07821	0.394546	Uncharacterized protein
TcCLB.508689.20	Q4CUG4	1.07703	0.334311	Eukaryotic translation initiation factor 3 subunit G
TcCLB.508535.10	Q4CYX1	1.07702	0.344418	NADH-dependent fumarate reductase, putative
TcCLB.506963.14	Q4DN73	1.07595	0.423928	40S ribosomal protein S27, putative
TcCLB.511283.10	Q4E2V9	1.07591	0.348065	Uncharacterized protein
TcCLB.509895.20	Q4DCY2	1.07516	0.442121	Uncharacterized protein
TcCLB.504827.21	Q4DNF1	1.0741	0.464747	Uncharacterized protein (Fragment)
TcCLB.511727.290	Q4DY30	1.07271	0.445532	RNA-binding protein, putative
TcCLB.511211.120	Q4DTN2	1.0705	0.275719	Activated protein kinase C receptor, putative
TcCLB.509505.10	Q4D004	1.06997	0.406837	Protein disulfide isomerase, putative (Fragment)
TcCLB.508595.50	Q4CTX9	1.06917	0.453002	Cysteineptidase, putative (Fragment)
TcCLB.506207.50	Q4CW52	1.069	0.37523	IgE-dependent histamine-releasing factor, putative
TcCLB.510437.40	Q4D123	1.06883	0.392254	Malate dehydrogenase
TcCLB.509499.14	Q4CX87	1.06859	0.365479	Tryparedoxinroxidase, putative
TcCLB.507689.30	Q4CYZ6	1.06813	0.353799	Glutamamyl carboxypeptidase, putative
TcCLB.510001.59	Q4CY83	1.06673	0.448265	Uncharacterized protein (Fragment)
TcCLB.509051.40	Q4CVK9	1.06613	0.396135	Adenosine kinase, putative
TcCLB.509539.50	Q4D318	1.06453	0.442883	Small GTP-binding protein, putative
TcCLB.430605.29	Q4CUL0	1.06291	0.374141	40S ribosomal protein S3, putative
TcCLB.508197.10	Q4CNF4	1.0618	0.425672	60S ribosomal protein L11, putative
TcCLB.509287.50	Q4E0B2	1.06108	0.162507	Glucose-6-phosphate 1-dehydrogenase
TcCLB.507059.60	Q4DBC5	1.06058	0.447326	Orotidine-5-phosphate decarboxylase/orotate phosphoribosyltransferase, putative
TcCLB.506925.150	Q4E4N2	1.05875	0.41685	Protein phosphatase, putative
TcCLB.510121.20	Q4DQ27	1.05814	0.399513	Phosphotransferase
TcCLB.507389.70	Q4D0I5	1.05607	0.436553	Peptidase, putative
TcCLB.507831.70	Q4DI66	1.05593	0.404092	Pyruvate dehydrogenase E1 component subunit alpha
TcCLB.511727.270	Q4DY32	1.05561	0.460404	RNA-binding protein, putative
TcCLB.506211.210	Q4DYJ7	1.05557	0.467116	Protein kinase, putative
TcCLB.510265.20	Q4DHH6	1.05397	0.457546	26S protease regulatory subunit, putative
TcCLB.507049.60	Q4DPX8	1.05374	0.461011	NAD(P)-dependent oxidoreductase, putative
TcCLB.511737.10	Q4D5Z5	1.05308	0.433082	Uncharacterized protein
TcCLB.511573.58	Q4CU30	1.05175	0.464576	Nucleolar protein, putative (Fragment)
TcCLB.510655.90	Q4DFY2	1.05137	0.471308	Uncharacterized protein
TRS	Q9GT49	1.05116	0.357327	Trypanothione synthetase
TcCLB.468941.9	Q4CKM6	1.05106	0.429201	ATP-dependent DEAD/H RNA helicase, putative (Fragment)
TcCLB.507669.170	Q4DRV4	1.0505	0.46309	Guanine nucleotide-binding protein beta subunit-like protein, putative
TcCLB.510761.14	Q4DG45	1.04935	0.434852	60S ribosomal protein L26, putative
TcCLB.506977.90	Q4DBY0	1.04842	0.412739	Proteasome regulatory non-ATPase subunit 5, putative
TcCLB.510029.70	Q4CWD6	1.04739	0.385491	40S ribosomal protein S13, putative
TcCLB.506945.320	Q4DX68	1.04656	0.379876	Uncharacterized protein
TcCLB.506773.20	Q4DQG1	1.0459	0.466892	Uncharacterized protein
TcCLB.507093.300	Q4E1M8	1.04466	0.46866	Uncharacterized protein
TcCLB.504045.60	Q4D9T0	1.04441	0.30003	Thermostable carboxypeptidase 1, putative
TcCLB.506989.190	Q4DW89	1.04393	0.328682	Lipophosphoglycan biosynthetic protein, putative
TcCLB.504157.10	Q4DGN8	1.0433	0.427302	Heterogeneous nuclear ribonucleoprotein H/F, putative
TcCLB.509695.200	Q4DTP9	1.0421	0.291194	T-complex protein 1 subunit delta
TcCLB.503929.10	Q4CZX4	1.04162	0.443186	V-type ATPase, A subunit, putative
TcCLB.511461.20	Q4D3Y8	1.04104	0.307939	Tyrosine aminotransferase
TcCLB.507513.60	Q4D916	1.0403	0.403392	40S ribosomal protein S16, putative
TcCLB.510643.190	Q4DWU4	1.03808	0.453286	Retrotransposon hot spot (RHS) protein, putative
TcCLB.510943.50	Q4DRT8	1.03804	0.356195	Delta-1-pyrroline-5-carboxylate dehydrogenase, putative
TcCLB.508153.1110	Q4E5Y4	1.03602	0.47082	Arginine N-methyltransferase, putative
TcCLB.503833.40	Q4DIZ9	1.03566	0.437536	40S ribosomal protein S2, putative
TcCLB.510515.100	Q4DEX0	1.03494	0.481383	Coronin, putative
TcCLB.503625.10	Q4CRM4	1.03419	0.385561	Asparagine synthetase A, putative
TcCLB.509541.19	Q4CRB1	1.03324	0.475279	Major vault protein, putative (Fragment)
TcCLB.511589.140	Q4DNR3	1.0326	0.430956	Phosphoenolpyruvate mutase, putative
TcCLB.506959.30	Q4DIE1	1.03204	0.445994	ATP-dependent DEAD/H RNA helicase, putative
TcCLB.503719.20	Q4CQU0	1.03077	0.441281	40S ribosomal protein SA
TcCLB.504425.60	Q4DFP0	1.03016	0.415353	NADP-dependent alcohol hydrogenase, putative
TcCLB.507767.10	Q4CLP3	1.0294	0.36227	Succinyl-CoA ligase [GDP-forming] beta-chain, putative (Fragment)
TcCLB.511867.140	Q4DKQ2	1.02544	0.479685	Acyl carrier protein
TcCLB.511007.20	Q4D823	1.02478	0.467515	Retrotransposon hot spot (RHS) protein, putative
TcCLB.503539.30	Q4CP51	1.02381	0.451313	GTP-binding nuclear protein
TcCLB.507251.20	Q4CQJ7	1.02351	0.416548	Ribosomal protein L21E (60S), putative
TcCLB.470399.10	Q4CKY4	1.02348	0.462471	Peptidyl-prolyl cis-trans isomerase (Fragment)
TcCLB.506537.299	Q4DZC9	1.02239	0.461811	Retrotransposon hot spot (RHS) protein, putative (Fragment)
TcCLB.506737.70	Q4DGS4	1.0221	0.465738	Ubiquitin-like protein, putative
TcCLB.511627.110	Q4D832	1.0214	0.467718	Heat shock protein DnaJ, putative
TcCLB.508523.40	Q4DL66	1.02119	0.487127	Dispersed gene family protein 1 (DGF-1), putative
TcCLB.511285.120	Q4DH96	1.02049	0.481192	ATP-dependent RNA helicase, putative
TcCLB.511441.10	Q4CS87	1.01622	0.472464	Calpain cysteineptidase, putative (Fragment)
TcCLB.507913.30	Q4CQ46	1.01544	0.469468	Proliferating cell nuclear antigen
TcCLB.511821.179	Q4DQS9	1.01335	0.455306	Uncharacterized protein (Fragment)
TcCLB.507537.30	Q4CUZ9	1.01084	0.493228	Cysteinyl-tRNA synthetase, putative
TcCLB.511855.20	Q4D6K0	1.00958	0.486525	Ubiquitin-like protein, putative
TcCLB.508461.550	Q4E4Q4	1.0093	0.482814	Uncharacterized protein
TcCLB.508153.130	Q4E679	1.00886	0.49021	Enoyl-CoA hydratase, mitochondrial, putative
TcCLB.506247.220	Q4E133	1.00868	0.455867	Histidine ammonia-lyase
TcCLB.508319.40	Q4D0U9	1.00846	0.47075	RNA helicase, putative
TcCLB.508355.250	Q4E3A4	1.00545	0.469538	60S acidic ribosomal protein P0
TcCLB.509215.40	Q4D2G4	1.00535	0.492908	Peptidyl-prolyl cis-trans isomerase
TcCLB.506167.40	Q4D5X3	1.0051	0.496059	Proteasome subunit alpha type
TcCLB.510187.100	Q4E4E1	-1.00035	0.498284	Glucokinase 1, putative
TcCLB.506213.120	Q4DC19	-1.00048	0.49946	ATP-dependent RNA helicase, putative
TcCLB.508373.29	Q4CSV7	-1.00146	0.49882	Orotidine-5-phosphate decarboxylase/orotate phosphoribosyltransferase, putative (Fragment)
TcCLB.509463.30	Q4CYP2	-1.00243	0.492032	3-ketoacyl-CoA thiolase, putative
TcCLB.508707.200	Q4E256	-1.00294	0.494625	Nucleoside diphosphate kinase
TcCLB.508319.70	Q4D0U7	-1.00345	0.485186	40S ribosomal protein S11, putative
TcCLB.503801.20	Q4CYE4	-1.00404	0.486214	40S ribosomal protein S26
TcCLB.509695.210	Q4DTP7	-1.00418	0.491735	Carboxypeptidase
TcCLB.506313.10	Q4CMJ5	-1.00495	0.493641	Retrotransposon hot spot (RHS) protein, putative (Fragment)
TcCLB.511215.119	Q4DIF6	-1.00572	0.490533	69 kDa paraflagellar rod protein, putative
TcCLB.506977.49	Q4DBY4	-1.00636	0.492031	Ribosomal proteins L36, putative
TcCLB.507967.30	Q4CR84	-1.00652	0.490601	Uncharacterized protein (Fragment)
TcCLB.457251.10	Q4CM68	-1.00681	0.488616	3-oxo-5-alpha-steroid 4-dehydrogenase, putative (Fragment)
TcCLB.507081.130	Q4DGT6	-1.00692	0.47991	Uncharacterized protein
TcCLB.509875.204	Q4E0C2	-1.00894	0.488641	Uncharacterized protein
TcCLB.509011.40	Q4DDX3	-1.00971	0.494174	Calreticulin, putative
TcCLB.511903.40	Q4DU88	-1.01217	0.458087	Uncharacterized protein
TcCLB.510837.20	Q4CR09	-1.01332	0.468125	Glutamamyl carboxypeptidase, putative
TcCLB.508369.50	Q4CWB3	-1.01341	0.493284	Acetyl-CoA carboxylase, putative (Fragment)
TcCLB.506235.20	Q4CSK3	-1.01377	0.468325	Uncharacterized protein
TcCLB.507657.20	Q4CPW5	-1.01407	0.466935	Glutamamyl carboxypeptidase, putative
TcCLB.507001.110	Q4DF18	-1.01451	0.465424	Galactokinase-like protein, putative
TcCLB.509047.40	Q4D6D8	-1.01596	0.481315	Uncharacterized protein
TcCLB.510947.30	Q4CU92	-1.01705	0.469115	Uncharacterized protein
TcCLB.506503.160	Q4DRD0	-1.0184	0.488279	Uncharacterized protein
TcCLB.503395.40	Q4CSL2	-1.01843	0.47844	60S ribosomal protein L18, putative
TcCLB.510235.10	Q4D2A9	-1.01866	0.489394	Dispersed gene family protein 1 (DGF-1), putative
TcCLB.511277.590	Q4E5D5	-1.01902	0.485119	Uncharacterized protein
TcCLB.511803.40	Q4D015	-1.01923	0.487076	Uncharacterized protein
TcCLB.509617.20	Q4D634	-1.02062	0.472947	Paraflagellar rod protein 3, putative
TcCLB.508357.100	Q4D6M9	-1.02122	0.486941	Uncharacterized protein
TcCLB.507723.130	Q4DQJ3	-1.02161	0.476232	Eukaryotic translation initiation factor 3 subunit 8, putative
TcCLB.508139.210	Q4E1E6	-1.02167	0.485298	Dispersed gene family protein 1 (DGF-1), putative
TcCLB.508665.14	Q4CNM5	-1.02281	0.456419	ATP-dependent Clp protease subunit, heat shock protein 100 (HSP100), putative (Fragment)
TcCLB.506749.20	Q4CS05	-1.02369	0.470182	Flagellar calcium-binding protein, putative
TcCLB.510337.20	Q4CXJ8	-1.02439	0.480208	Calpain-like cysteineptidase, putative
TcCLB.511313.40	Q4D1V0	-1.02461	0.483648	ATP-dependent RNA helicase, putative (Fragment)
TcCLB.506405.149	Q4DED2	-1.0251	0.391045	Ribosomal protein L21E (60S), putative
TcCLB.506621.30	Q4D6V2	-1.02672	0.441066	Ribonucleoside-diphosphate reductase small chain, putative
TcCLB.509695.170	Q4CVX9	-1.02686	0.429403	60S ribosomal protein L9, putative
TcCLB.482471.19	Q4CM53	-1.0306	0.432806	ATP-dependent DEAD/H RNA helicase, putative (Fragment)
TcCLB.511183.460	Q4E5K0	-1.03128	0.48029	Dispersed gene family protein 1 (DGF-1), putative
TcCLB.508461.500	Q4E4Q8	-1.03133	0.45628	60S ribosomal protein L27A/L29, putative
TcCLB.510507.20	Q4D7M6	-1.0324	0.400311	3-ketoacyl-CoA thiolase, putative
TcCLB.506943.50	Q4DCN9	-1.03267	0.269398	Glyceraldehyde-3-phosphate dehydrogenase
TcCLB.503957.120	Q4DKR6	-1.03275	0.438427	Retrotransposon hot spot (RHS) protein, putative
TcCLB.506529.420	Q4E5P0	-1.03418	0.355623	Alanine aminotransferase, putative
TcCLB.511019.74	Q4DI32	-1.03471	0.447613	Retrotransposon hot spot (RHS) protein, putative
TcCLB.509999.90	Q4DKK5	-1.0348	0.411944	Carnitine/choline acetyltransferase, putative
TcCLB.508209.110	Q4DFA9	-1.03533	0.472243	Uncharacterized protein
TcCLB.508119.144	Q4DQ60	-1.03711	0.456656	Ribosomal protein L38, putative
TcCLB.510755.89	Q4D7Y4	-1.0377	0.444688	Kinetoplastid membrane protein KMP-11, putative
TcCLB.507681.20	Q4DW49	-1.03781	0.382142	Succinate--CoA ligase [ADP-forming] subunit beta, mitochondrial
TcCLB.508355.320	Q4E397	-1.03861	0.471874	Arginyl-tRNA synthetase, putative
TcCLB.503899.130	Q4DEJ4	-1.03966	0.414574	Glutathioneroxidase
TcCLB.510003.20	Q4D3R4	-1.0414	0.468603	Uncharacterized protein
TcCLB.510187.30	Q4E4E7	-1.04355	0.319864	Tyrosine aminotransferase
TcCLB.506777.110	Q4DC65	-1.04565	0.451935	Uncharacterized protein
TcCLB.504045.110	Q4D9S6	-1.04651	0.433351	Urocanate hydratase, putative
TcCLB.510889.120	Q4E2N8	-1.04681	0.320469	Alanine aminotransferase, putative
TcCLB.511239.110	Q4DJ35	-1.04985	0.347901	Uncharacterized protein
TcCLB.507941.150	Q4DEL1	-1.05077	0.314584	Histone H4
TcCLB.506835.30	Q4DGQ2	-1.05124	0.352223	60S ribosomal protein L9, putative
TcCLB.510659.240	Q4D7B4	-1.05281	0.461652	Lactoylglutathione lyase-like protein, putative
TcCLB.506529.430	Q4E5N8	-1.05415	0.3076	Alanine aminotransferase, putative
TcCLB.504153.280	Q4E2Q5	-1.05428	0.394236	Uncharacterized protein
TcCLB.507031.90	Q4DSA0	-1.05453	0.419518	Arginase, putative
TcCLB.509859.40	Q4D4Y0	-1.05454	0.468846	Cytosolic leucyl aminopeptidase, putative
TcCLB.504213.80	Q4DIK8	-1.05788	0.471141	Threonine synthase, putative
TcCLB.507929.20	Q4CPP0	-1.06236	0.380242	Co-chaperone GrpE, putative
TcCLB.508879.80	Q4DXE8	-1.06244	0.460827	Uncharacterized protein
TcCLB.509577.9	Q4CMR1	-1.06262	0.456895	Uncharacterized protein (Fragment)
TcCLB.507017.40	Q4DFE2	-1.06285	0.354518	2-hydroxy-3-oxopropionate reductase, putative
TcCLB.509837.10	Q4CVB2	-1.06298	0.459282	Uncharacterized protein
TcCLB.511001.9	Q4DZ41	-1.06357	0.17169	40S ribosomal protein S3a-2
TcCLB.507047.110	Q4DPS6	-1.06449	0.454932	Otubain, putative
TcCLB.510797.30	Q4CYI1	-1.06666	0.434436	Uncharacterized protein
TcCLB.506933.60	Q4DCA9	-1.06938	0.343134	Mitochondrial RNA binding protein, putative
TcCLB.507519.110	Q4DNZ7	-1.07015	0.33845	60S ribosomal protein L7, putative
TcCLB.510311.70	Q4DTF6	-1.07134	0.440396	26S protease regulatory subunit, putative
TcCLB.504147.80	Q4DZN7	-1.07149	0.448158	Mitochondrial intermediateptidase, putative
TcCLB.507891.47	Q4CTX0	-1.07205	0.419238	Flagellar calcium-binding protein, putative
TcCLB.503405.10	Q4CN04	-1.07264	0.275917	Glutamine synthetase, putative
TcCLB.507547.90	Q4D8V7	-1.07357	0.314724	Glycosomal phosphoenolpyruvate carboxykinase, putative
TcCLB.506241.170	Q4DU31	-1.07454	0.343487	40S ribosomal protein S6
TcCLB.509497.20	Q4CMT5	-1.07465	0.380746	Uncharacterized protein
TcCLB.508737.100	Q4DTH5	-1.07495	0.413843	ATP-dependent Clp protease subunit, heat shock protein 78, putative
TcCLB.408345.20	Q4CL22	-1.07588	0.458006	2-oxoglutarate dehydrogenase subunit, putative (Fragment)
TcCLB.503477.20	Q4CUD7	-1.07653	0.249619	Transaldolase
TcCLB.503617.40	Q4CXB4	-1.07745	0.382065	ATPase alpha subunit, putative (Fragment)
TcCLB.509683.117	Q4D5P4	-1.07851	0.237829	40S ribosomal protein S4
TcCLB.508089.30	Q4CYV9	-1.07962	0.368045	Uncharacterized protein
TcCLB.510421.210	Q4DXR1	-1.08068	0.439492	Uncharacterized protein
TcCLB.509351.10	Q4CM74	-1.08126	0.372276	Delta-1-pyrroline-5-carboxylate dehydrogenase, putative (Fragment)
TcCLB.510877.40	Q4DPV6	-1.08164	0.389372	Uncharacterized protein
TcCLB.506405.120	Q4DED4	-1.08202	0.413054	V-type ATPase, A subunit, putative
TcCLB.507063.90	Q4E024	-1.08402	0.343264	Mitochondrial DNA polymerase beta, putative
TcCLB.463155.20	Q4CU66	-1.08437	0.352762	Retrotransposon hot spot (RHS) protein, putative
TcCLB.508647.200	Q4DV43	-1.0848	0.385581	Triosephosphate isomerase
TcCLB.508647.110	Q4DV52	-1.08602	0.441847	Uncharacterized protein
TcCLB.510797.10	Q4CYI3	-1.08805	0.414554	2-oxoglutarate dehydrogenase subunit, putative
TcCLB.510661.250	Q4DUG8	-1.08942	0.301865	Cystathione gamma lyase, putative
TcCLB.507993.150	Q4E1W3	-1.09033	0.429925	Uncharacterized protein
TcCLB.511815.180	Q4DJ91	-1.09102	0.374408	Uncharacterized protein
TcCLB.507555.80	Q4D5T6	-1.09207	0.424127	Retrotransposon hot spot (RHS) protein, putative
TcCLB.509917.19	Q4CRM5	-1.09231	0.336775	Retrotransposon hot spot (RHS) protein, putative (Fragment)
TcCLB.507089.270	Q4DWL8	-1.09232	0.220934	Dihydrolipoyl dehydrogenase
TcCLB.506859.180	Q4DVF8	-1.09363	0.348917	Uncharacterized protein
TcCLB.506957.90	Q4DKZ4	-1.094	0.20698	60S ribosomal protein L18a
TcCLB.508153.400	Q4E650	-1.0942	0.368844	Serine/threonine protein kinase, putative
TcCLB.508111.30	Q4D5C2	-1.09451	0.0521945	Glutamate dehydrogenase
TcCLB.507889.10	Q4CMZ5	-1.09463	0.21963	Transaldolase
TcCLB.506563.30	Q4DQP3	-1.09475	0.430289	Coatomer subunit beta
TcCLB.508589.30	Q4D3Z2	-1.09508	0.312892	Retrotransposon hot spot (RHS) protein, putative
TcCLB.511439.40	Q4DAP5	-1.0951	0.180726	Uncharacterized protein
TcCLB.506739.50	Q4DEP1	-1.09539	0.331664	Heat shock protein HslVU, ATPase subunit HslU, putative
TcCLB.511283.290	Q4E2T2	-1.09587	0.421086	Uncharacterized protein
TcCLB.510101.140	Q4E3P5	-1.09665	0.189416	Pyruvate, phosphate dikinase
TcCLB.509445.39	Q4CR18	-1.09745	0.338329	Glutamate dehydrogenase, putative (Fragment)
TcCLB.506925.319	Q4E4L7	-1.0998	0.0970152	Isocitrate dehydrogenase [NADP]
TcCLB.511303.60	Q4DSL1	-1.10233	0.324309	Translation initiation factor, putative
TcCLB.508441.20	Q4DB81	-1.10301	0.25317	Glycosomal phosphoenolpyruvate carboxykinase, putative
TcCLB.511483.40	Q4D554	-1.10385	0.404925	Prefoldin subunit 2, putative
TcCLB.505999.100	Q4DNV7	-1.10435	0.233876	Phosphoglycerate kinase
TcCLB.506945.20	Q4DX96	-1.10472	0.433597	Phosphoglycerate kinase
TcCLB.509205.120	Q4D7E5	-1.10624	0.378113	Uncharacterized protein
TcCLB.511909.40	Q4D4X1	-1.10631	0.430488	Succinate dehydrogenase [ubiquinone] flavoprotein subunit, mitochondrial
TcCLB.506047.20	Q4CUP4	-1.10718	0.27519	Retrotransposon hot spot (RHS) protein, putative
TcCLB.506211.160	Q4DYK2	-1.10777	0.334811	ADP,ATP carrier protein 1, mitochondrial, putative
TcCLB.510741.10	Q4DRM4	-1.10783	0.215042	Cystathione gamma lyase, putative (Fragment)
TcCLB.504105.150	Q4DZ97	-1.10817	0.414209	Importin beta-1 subunit, putative
TcCLB.511903.110	Q4DU83	-1.1107	0.360244	40S ribosomal protein S8
TcCLB.510889.140	Q4E2N6	-1.11075	0.176665	Alanine aminotransferase, putative
TcCLB.508707.310	Q4E246	-1.11101	0.188922	Uncharacterized protein
TcCLB.510679.40	Q4CYC6	-1.11246	0.0776452	Uncharacterized protein
TcCLB.506821.210	Q4DNM4	-1.11315	0.415453	NADH-cytochrome b5 reductase
TcCLB.505171.60	Q4D905	-1.11428	0.332018	Uncharacterized protein
TcCLB.511025.70	Q4DD37	-1.11513	0.0962242	Chaperonin alpha subunit, putative
TcCLB.503811.60	Q4D248	-1.11568	0.412327	Elongation factor Ts 1, mitochondrial
TcCLB.506843.40	Q4DKM0	-1.11666	0.287495	Retrotransposon hot spot (RHS) protein, putative
TcCLB.504153.160	Q4E2R7	-1.11679	0.171232	Carboxypeptidase, putative
TcCLB.507019.40	Q4DA54	-1.11759	0.436582	Histidyl-tRNA synthetase, putative
TcCLB.506559.470	Q4E581	-1.11946	0.33723	Ribosomal protein L35A, putative
TcCLB.506401.320	Q4E3R2	-1.12007	0.190449	60S ribosomal protein L7a, putative
TcCLB.506943.4	Q4DCP7	-1.12048	0.404727	Aldehyde dehydrogenase, putative (Fragment)
TcCLB.511419.40	Q4D193	-1.12146	0.185742	Phosphoglycerate kinase
TcCLB.511233.7	Q4DN74	-1.12624	0.410855	60S ribosomal protein L10a, putative (Fragment)
TcCLB.504191.10	Q4CMB7	-1.12691	0.306779	Methyltransferase
TcCLB.507521.150	Q4DNC0	-1.1282	0.421239	Dispersed gene family protein 1 (DGF-1), putative
TcCLB.507891.29	Q4CTX2	-1.12974	0.307831	Flagellar calcium-binding protein, putative
TcCLB.510751.4	Q4CSP6	-1.13253	0.302367	Aminopeptidase P, putative (Fragment)
TcCLB.505985.9	Q4CPQ6	-1.13385	0.264321	Calpain cysteineptidase, putative (Fragment)
TcCLB.509611.180	Q4DK88	-1.13441	0.358659	Peptide methionine sulfoxide reductase, putative
TcCLB.503581.39	Q4CU56	-1.13488	0.424411	Coatomer subunit delta (Fragment)
TcCLB.510769.49	Q4DSU0	-1.1355	0.209867	40S ribosomal protein S6
TcCLB.504181.20	Q4DTQ1	-1.13813	0.389484	40S ribosomal protein S23, putative
TcCLB.507641.290	Q4DYP5	-1.13867	0.00242548	Chaperonin HSP60, mitochondrial
TcCLB.509735.120	Q4DQ04	-1.13868	0.325669	Retrotransposon hot spot (RHS) protein, putative
TcCLB.510143.24	Q4DAT6	-1.13888	0.308904	Hsc70-interacting protein (Hip), putative
TcCLB.509265.10	Q4DGT4	-1.14116	0.425161	Retrotransposon hot spot (RHS) protein, putative
TcCLB.511281.60	Q4D9Z4	-1.14145	0.208174	Pyruvate kinase
TcCLB.508971.30	Q4D7V3	-1.14157	0.405332	Lysine--tRNA ligase
TcCLB.509295.80	Q4DKD3	-1.14265	0.311883	Retrotransposon hot spot (RHS) protein, putative
TcCLB.511773.110	Q4D9N3	-1.14291	0.252611	Retrotransposon hot spot (RHS) protein, putative
TcCLB.504105.140	Q4DZ98	-1.14417	0.0880097	Enolase, putative
TcCLB.511899.40	Q4CT37	-1.1444	0.198121	2-amino-3-ketobutyrate coenzyme A ligase, putative
TcCLB.511725.250	Q4DWG6	-1.14477	0.219554	Chaperonin containing T-complex protein, putative
TcCLB.508169.20	Q4D5X0	-1.14581	0.090496	Elongation factor 2, putative
TcCLB.506297.190	Q4E0Q0	-1.14623	0.120468	Pyruvate, phosphate dikinase
TcCLB.510655.120	Q4DFX9	-1.14784	0.238833	Aminopeptidase P, putative
TcCLB.506481.20	Q4CZY9	-1.1479	0.104169	Uncharacterized protein
TcCLB.503575.34	Q4D205	-1.14979	0.312196	Ribosomal protein L38, putative
TcCLB.510187.551	Q4E496	-1.15362	0.0407455	Chaperonin HSP60 mitochondrial, putative (Fragment)
TcCLB.511519.9	Q4CLR4	-1.1538	0.353077	Uncharacterized protein (Fragment)
TcCLB.509351.4	Q4CM76	-1.15486	0.323435	Ribosomal protein L38, putative
TcCLB.510215.10	Q4CMU8	-1.15558	0.249647	NADH-dependent fumarate reductase, putative
TcCLB.508465.90	Q4DHU8	-1.15705	0.20301	Galactokinase, putative
TcCLB.510099.120	Q4DAE1	-1.15708	0.122075	D-isomer specific 2-hydroxyacid dehydrogenase-protein, putative
TcCLB.507875.20	Q4DWV8	-1.15771	0.0152021	Glutamate dehydrogenase
TcCLB.509543.50	Q4CWK5	-1.16009	0.165412	DNAK protein, putative (Fragment)
TcCLB.506247.50	Q4E151	-1.16186	0.0592428	Chaperonin, putative
TcCLB.511727.140	Q4DY45	-1.16459	0.356113	Phenylalanyl-tRNA synthetase alpha chain, putative
TcCLB.508409.210	Q4DWS5	-1.16608	0.276311	Hsc70-interacting protein, putative
TcCLB.508741.170	Q4E355	-1.16614	0.0665929	Uncharacterized protein
TcCLB.508473.10	Q4CRR5	-1.16826	0.237009	Retrotransposon hot spot (RHS) protein, putative
TcCLB.507033.10	Q4CVE4	-1.16921	0.405211	Uncharacterized protein
TcCLB.510317.7	Q4CY57	-1.1706	0.358991	Uncharacterized protein (Fragment)
TcCLB.506315.100	Q4D795	-1.1711	0.25043	Protein phosphatase 2C, putative
TcCLB.508741.300	Q4E342	-1.17149	0.359412	Proteasome regulatory non-ATPase subunit 6, putative
TcCLB.506435.150	Q4E318	-1.17186	0.356825	Uncharacterized protein
TcCLB.507609.60	Q4DFC2	-1.17228	0.296625	Myo-inositol-1-phosphate synthase, putative
TcCLB.506167.50	Q4D5X2	-1.17717	0.183188	Clathrin heavy chain
TcCLB.503749.5	Q4CVK6	-1.17848	0.373255	Pyrroline-5-carboxylate synthetase-like protein, putative (Fragment)
TcCLB.506941.280	Q4DXG9	-1.17911	0.0582209	Heat shock 70 kDa protein, mitochondrial, putative (Fragment)
TcCLB.506127.30	Q4DP96	-1.17962	0.348317	Phenylalanyl-tRNA synthetase, putative
TcCLB.504147.200	Q4DZM5	-1.18092	0.370816	Proteasome regulatory ATPase subunit, putative
TcCLB.506605.59	Q4DUX5	-1.18141	0.0632715	Adenosine 5'-monophosphoramidase, putative
TcCLB.506629.220	Q4DQC2	-1.18411	0.391722	Isovaleryl-coA dehydrogenase, putative
TcCLB.510741.180	Q4DRK9	-1.18461	0.230998	ATP-dependent RNA helicase, putative
TcCLB.511019.13	Q4DI33	-1.18607	0.200568	Retrotransposon hot spot (RHS) protein, putative (Fragment)
TcCLB.507625.99	Q4DPE6	-1.18832	0.375269	Gamma-glutamylcysteine synthetase, putative
TcCLB.506275.20	Q4D729	-1.18986	0.3508	Hslvu complex proteolytic subunit-like, putative
TcCLB.506829.110	Q4DD91	-1.19055	0.091748	Fatty acyl CoA synthetase 2, putative
TcCLB.508357.90	Q4D6N0	-1.19062	0.0719845	T-complex protein 1, beta subunit, putative
TcCLB.507831.60	Q4DI67	-1.19081	0.193697	Heat shock protein, putative
TcCLB.509381.20	Q4CP93	-1.19295	0.364081	40S ribosomal protein S15a, putative
TcCLB.511301.110	Q4DM82	-1.19428	0.278322	Inosine-5'-monophosphate dehydrogenase
TcCLB.503849.60	Q4D779	-1.19531	0.128994	NADH-dependent fumarate reductase, putative
TcCLB.503419.30	Q4CZ29	-1.1977	0.152387	Thiol-dependent reductase 1, putative
TcCLB.511277.60	Q4E5I9	-1.19907	0.161766	Alcohol dehydrogenase, putative
TcCLB.508959.4	Q4CV48	-1.19952	0.197466	Cytochrome c, putative
TcCLB.506933.20	Q4DCB6	-1.1997	0.370716	Ribonucleoside-diphosphate reductase
TcCLB.508739.60	Q4CMF1	-1.2007	0.059233	Histone H4
TcCLB.508461.410	Q4E4R8	-1.2013	0.027284	T-complex protein 1, eta subunit, putative
TcCLB.510683.20	Q4CNI4	-1.20245	0.247759	Uncharacterized protein
TcCLB.484311.10	Q4CLF8	-1.20284	0.159205	Calpain-like cysteineptidase, putative (Fragment)
TcCLB.511229.80	Q4D452	-1.20395	0.087091	Eukaryotic translation initiation factor 3 subunit I
TcCLB.509747.20	Q4DD81	-1.20514	0.277646	60S ribosomal protein L22, putative
TcCLB.508299.80	Q4D9G6	-1.20699	0.229012	Threonyl-tRNA synthetase, putative
TcCLB.503897.20	Q4DKP3	-1.20827	0.186765	Uncharacterized protein
TcCLB.509733.100	Q4DWC3	-1.20934	0.0213171	Translation elongation factor 1-beta, putative
TcCLB.508479.340	Q4E2I6	-1.21052	0.157092	Succinate--CoA ligase [ADP-forming] subunit alpha, mitochondrial
TcCLB.508303.4	Q4DE00	-1.21067	0.128277	Ubiquitin-conjugating enzyme E2, putative
TcCLB.510663.70	Q4D0X5	-1.21217	0.164185	6-phosphogluconate dehydrogenase, decarboxylating
TcCLB.503855.20	Q4DBH6	-1.21254	0.344063	Spermidine synthase, putative
TcCLB.506297.290	Q4E0P0	-1.21521	0.204533	Protein transport protein sec31, putative
TcCLB.503479.70	Q4D6Z0	-1.21601	0.23424	Uncharacterized protein
TcCLB.508699.20	Q4DE52	-1.21771	0.3559	Uncharacterized protein
TcCLB.509003.30	Q4CW64	-1.21984	0.324479	Calpain-like cysteineptidase, putative
TcCLB.510301.80	Q4D0P4	-1.22212	0.335049	N-acetyltransferase subunit Nat1, putative
TcCLB.504153.310	Q4E2Q2	-1.22486	0.180277	Heat shock protein, putative
TcCLB.507611.370	Q4E3F7	-1.22513	0.256941	Protein disulfide-isomerase
TcCLB.507297.20	Q4CQ34	-1.23188	0.368078	Cysteinyl-tRNA synthetase, putative
TcCLB.511229.50	Q4D455	-1.23498	0.015352	Adenosylhomocysteinase
TcCLB.509167.20	Q4DQR5	-1.23604	0.132544	3-hydroxy-3-methylglutaryl coenzyme A reductase
TcCLB.506201.39	Q4DG86	-1.2361	0.222815	25 kDa translation elongation factor 1-beta, putative
TcCLB.505183.30	Q4DJ68	-1.23914	0.139432	Malic enzyme
TcCLB.509213.120	Q4DGX6	-1.24229	0.130595	Peptidase M20/M25/M40, putative
TcCLB.507951.299	Q4DUR3	-1.24323	0.292604	Uncharacterized protein (Fragment)
TcCLB.507641.160	Q4DYQ9	-1.24415	0.319903	Uncharacterized protein
TcCLB.506303.80	Q4DN44	-1.24696	0.333466	Uncharacterized protein
TcCLB.508153.280	Q4E661	-1.24859	0.0318066	60S ribosomal protein L13
TcCLB.503793.10	Q4CMR4	-1.25074	0.364531	2-oxoglutarate dehydrogenase subunit, putative (Fragment)
TcCLB.509067.70	Q4D112	-1.25193	0.165796	Pyrroline-5-carboxylate synthetase-like protein, putative (Fragment)
TcCLB.503689.4	Q4CV38	-1.25239	0.317553	Rab1 small GTP-binding protein, putative
TcCLB.503899.110	Q4DEJ6	-1.25266	0.0990528	Glutathioneroxidase
TcCLB.511279.60	Q4CZY1	-1.2534	0.327045	Uncharacterized protein
TcCLB.508461.490	Q4E4R0	-1.25355	0.206365	60S ribosomal protein L23, putative
TcCLB.506393.189	Q4DL82	-1.25666	0.0257956	Retrotransposon hot spot (RHS) protein, putative (Fragment)
TcCLB.511289.70	Q4DD13	-1.261	0.1742	ADP,ATP carrier protein 1, mitochondrial, putative
TcCLB.509563.50	Q4D006	-1.26155	0.19233	Uncharacterized protein
TcCLB.509911.90	Q4DFP8	-1.26305	0.235577	Peptidase, putative
TcCLB.511257.10	Q4DGL0	-1.26369	0.0191473	DNAK protein, putative (Fragment)
TcCLB.510247.10	Q4CRN7	-1.26487	0.105526	R27-2 protein, putative
TcCLB.509105.70	Q4DKI7	-1.26769	0.143383	Thiol-dependent reductase 1, putative
TcCLB.507673.20	Q4CVX1	-1.26888	0.0323273	60S ribosomal protein L13a, putative
TcCLB.510661.90	Q4DUI3	-1.26976	0.194183	ATP-dependent RNA helicase, putative
TcCLB.506401.180	Q4E3S5	-1.26995	0.33118	Uncharacterized protein
TcCLB.504163.110	Q4D4R3	-1.27038	0.313547	N-acetyltransferase subunit Nat1, putative
TcCLB.510089.200	Q4DQZ2	-1.2748	0.307054	Uncharacterized protein
TcCLB.508647.280	Q4DV36	-1.27538	0.0732545	Malic enzyme
TcCLB.507153.30	Q4D375	-1.27725	0.356514	Dispersed gene family protein 1 (DGF-1), putative
TcCLB.507501.10	Q4CX26	-1.2782	0.0350074	Retrotransposon hot spot (RHS) protein, putative
TcCLB.511277.290	Q4E5G5	-1.27895	0.261411	Aconitate hydratase
TcCLB.504121.30	Q4CQW2	-1.27972	0.231249	60S ribosomal protein L4, putative
TcCLB.508577.140	Q4DPB9	-1.28109	0.338156	Peptidyl-prolyl cis-trans isomerase
TcCLB.509167.100	Q4DQQ7	-1.28192	0.285918	Valyl-tRNA synthetase, putative
TcCLB.511801.60	Q4D7H6	-1.2821	0.363021	Mitochondrial DEAD box protein, putative
TcCLB.508971.40	Q4D7V2	-1.28325	0.160111	Acetylornithine deacetylase-like, putative
TcCLB.509965.290	Q4E0T1	-1.28457	0.0423248	p22 protein, putative
TcCLB.510329.130	Q4E3K0	-1.28929	0.347356	UDP-glucose:glycoprotein glucosyltransferase
TcCLB.509733.170	Q4DWB5	-1.29768	0.20853	Transitional endoplasmic reticulum ATPase, putative
TcCLB.505843.10	Q4CVH4	-1.29964	0.0174984	Glutamate dehydrogenase, putative (Fragment)
TcCLB.508175.370	Q4E2W0	-1.30122	0.0503498	Glutamine synthetase, putative
TcCLB.509429.4	Q4E0M5	-1.3039	0.124101	Retrotransposon hot spot (RHS) protein, putative (Fragment)
TcCLB.507211.40	Q4CUG6	-1.30547	0.190288	Inosine-5'-monophosphate dehydrogenase
TcCLB.509671.80	Q4CU61	-1.30593	0.195935	60S ribosomal protein L5, putative
TcCLB.511859.170	Q4DLP7	-1.3067	0.346202	NADH-cytochrome b5 reductase
TcCLB.508457.20	Q4CS27	-1.30779	0.332282	Uncharacterized protein
TcCLB.504431.64	Q4D714	-1.30888	0.2016	High mobility group protein, putative
TcCLB.508039.30	Q4CYR3	-1.31266	0.186683	Retrotransposon hot spot (RHS) protein, putative
TcCLB.511301.170	Q4DM77	-1.31694	0.230113	Retrotransposon hot spot (RHS) protein, putative
TcCLB.507671.30	Q4CQA2	-1.32016	0.147057	25 kDa translation elongation factor 1-beta
TcCLB.508445.20	Q4D4J5	-1.32027	0.1038	Superoxide dismutase
TcCLB.510969.40	Q4CNT1	-1.32104	0.307066	Uncharacterized protein (Fragment)
TcCLB.506425.40	Q4DM53	-1.32204	0.192314	Uncharacterized protein
TcCLB.504069.56	Q4DAV9	-1.32238	0.140083	60S ribosomal protein L37a, putative
TcCLB.509013.10	Q4CW02	-1.32287	0.202369	Calpain-like cysteineptidase, putative (Fragment)
TcCLB.507167.20	Q4DYW4	-1.32322	0.0632966	Retrotransposon hot spot (RHS) protein, putative
TcCLB.506559.350	Q4E595	-1.32472	0.300047	Asparaginyl-tRNA synthetase, putative
TcCLB.507943.5	Q4CXR1	-1.3265	0.0401183	Histone H4 (Fragment)
TcCLB.503483.9	Q4CMA6	-1.32779	0.0333917	Retrotransposon hot spot (RHS) protein, putative (Fragment)
TcCLB.511101.19	Q4CVW3	-1.32822	0.122874	Retrotransposon hot spot (RHS) protein, putative
TcCLB.506625.60	Q4DUD6	-1.32892	0.188575	Inositol 5-phosphatase 1, putative
TcCLB.503939.80	Q4DLK5	-1.3303	0.290582	Prolyl-tRNA synthetase, putative
TcCLB.506593.30	Q4CUC7	-1.33043	0.11288	Ribosomal protein S7, putative
TcCLB.506975.40	Q4DGW6	-1.33168	0.188807	Aminoacylase, putative
TcCLB.506885.320	Q4E4H1	-1.3355	0.258133	Uncharacterized protein
TcCLB.504109.200	Q4DR27	-1.33579	0.0962558	Retrotransposon hot spot (RHS) protein, putative
TcCLB.509053.70	Q4DG13	-1.33634	0.110254	p22 protein, putative
TcCLB.509105.140	Q4DBM7	-1.33682	0.106578	Heat shock protein 85, putative
TcCLB.506443.150	Q4DME9	-1.33831	0.294594	Retrotransposon hot spot (RHS) protein, putative
TcCLB.506649.20	Q4DE37	-1.34238	0.154341	Plasma membrane ATPase
TcCLB.508993.10	Q4CP83	-1.34436	0.339352	CTP synthase (Fragment)
TcCLB.506835.110	Q4DGP4	-1.34454	0.207646	Uncharacterized protein
TcCLB.511421.200	Q4DWP4	-1.34474	0.184661	Uncharacterized protein
TcCLB.510835.40	Q4D531	-1.34536	0.0655377	60S ribosomal protein L7a, putative
TcCLB.506835.80	Q4DGP7	-1.3484	0.253897	CAS/CSE/importin domain protein, putative
TcCLB.511263.9	Q4D673	-1.34886	0.092569	Heat shock protein, putative (Fragment)
TcCLB.504105.94	Q4DTX6	-1.34894	0.0531153	Ribosomal protein S25, putative
TcCLB.506263.30	Q4CU50	-1.35279	0.0164223	D-isomer specific 2-hydroxyacid dehydrogenase-protein, putative
TcCLB.404001.20	Q4CX61	-1.35461	0.252053	Uncharacterized protein (Fragment)
TcCLB.508153.460	Q4E644	-1.35495	0.240857	Uncharacterized protein
TcCLB.509109.30	Q4DQN2	-1.35523	0.226003	Uncharacterized protein
TcCLB.507933.10	Q4CVE1	-1.35532	0.189694	Uncharacterized protein
TcCLB.510421.130	Q4DXR8	-1.35694	0.233855	Uncharacterized protein
TcCLB.510543.90	Q4DQ78	-1.36016	0.0438928	Retrotransposon hot spot (RHS) protein, putative
TcCLB.510089.110	Q4DQZ8	-1.36109	0.244378	Uncharacterized protein
TcCLB.507993.260	Q4E1V5	-1.36309	0.253146	Uncharacterized protein
TcCLB.509237.130	Q4DJS7	-1.36788	0.191543	Cytoskeleton-associated protein CAP5.5, putative
TcCLB.509693.80	Q4DRC3	-1.36879	0.0956041	Hypoxanthine-guanine phosphoribosyltransferase, putative
TcCLB.508533.10	Q4D4Y8	-1.36967	0.205138	Uncharacterized protein (Fragment)
TcCLB.503995.50	Q4CW30	-1.37315	0.129144	Oligopeptidase B, putative
TcCLB.511385.14	Q4DKH5	-1.37683	0.347356	Uncharacterized protein (Fragment)
TcCLB.507641.60	Q4DYS1	-1.37684	0.222865	Aldehyde dehydrogenase, putative
TcCLB.507843.10	Q4CLZ8	-1.37777	0.138764	Retrotransposon hot spot (RHS) protein, putative
TcCLB.506931.10	Q4D2M6	-1.38122	0.0109723	Haloacid dehalogenase-like hydrolase, putative
TcCLB.511023.10	Q4CM65	-1.38131	0.10638	Pyrroline-5-carboxylate synthetase-like protein, putative (Fragment)
TcCLB.511367.60	Q4DYI6	-1.38149	0.3303	LA RNA binding protein, putative
TcCLB.506301.50	Q4D0L3	-1.38306	0.123001	Succinyl-CoA:3-ketoacid-coenzyme A transferase
TcCLB.506127.110	Q4DP89	-1.38568	0.0588999	Eukaryoticptide chain release factor subunit 1, putative
TcCLB.506301.11	Q4D0L7	-1.38684	0.0158165	Heat shock protein, putative (Fragment)
TcCLB.507611.10	Q4E3H4	-1.38849	0.03905	Retrotransposon hot spot (RHS) protein, putative
TcCLB.507969.10	Q4D546	-1.39033	0.331123	Vesicular transport-associated repeat protein, putative
TcCLB.506721.30	Q4D6J0	-1.39095	0.157542	Calpain-like cysteineptidase, putative
TcCLB.503715.30	Q4CZR0	-1.39157	0.0731449	Small GTP-binding protein Rab1, putative
TcCLB.509165.40	Q4CVQ4	-1.39247	0.0889034	60S acidic ribosomal protein P2 beta (H6.4), putative
TcCLB.506491.20	Q4D1D3	-1.39411	0.085416	Myosin heavy chain, putative (Fragment)
TcCLB.511049.40	Q4CTR0	-1.40186	0.146107	Leucyl-tRNA synthetase, putative
TcCLB.503971.10	Q4CY39	-1.40279	0.230085	Uncharacterized protein
TcCLB.510901.150	Q4DXC0	-1.4035	0.232813	Proteasome regulatory non-ATPase subunit 2, putative
TcCLB.510395.10	Q4CNR6	-1.40404	0.112836	ATP synthase, alpha chain, mitochondrial, putative (Fragment)
TcCLB.505977.26	Q4CSS8	-1.40674	0.141354	60S acidic ribosomal protein P2, putative
TcCLB.510777.20	Q4CNC1	-1.41093	0.22544	Aspartyl-tRNA synthetase, putative
TcCLB.510131.40	Q4D5I2	-1.412	0.0526784	Haloacid dehalogenase-like hydrolase, putative
TcCLB.508071.90	Q4D5F9	-1.41302	0.074858	Retrotransposon hot spot (RHS) protein, putative (Fragment)
TcCLB.506407.80	Q4DCV5	-1.42144	0.193099	Uncharacterized protein
TcCLB.508209.120	Q4DFA8	-1.42391	0.0853182	10 kDa heat shock protein, putative
TcCLB.506323.30	Q4D0U5	-1.42855	0.157784	Retrotransposon hot spot (RHS) protein, putative
TcCLB.506297.150	Q4E0Q3	-1.42864	0.0984995	40S ribosomal protein S5, putative
TcCLB.510765.70	Q4CU60	-1.43037	0.0916813	60S ribosomal protein L5, putative
TcCLB.506195.190	Q4DXK7	-1.43103	0.205347	Uncharacterized protein
TcCLB.504089.50	Q4DE57	-1.43128	0.22606	Flagellar radial spoke component, putative
TcCLB.510767.10	Q4CTG9	-1.43215	0.29329	Ribosomal protein L15
TcCLB.508649.20	Q4CY89	-1.43302	0.196779	Uncharacterized protein
TcCLB.511807.110	Q4E1D4	-1.43608	0.239201	GMP synthase, putative
TcCLB.510145.20	Q4CVE9	-1.43787	0.0278012	Cofilin/actin depolymerizing factor, putative
TcCLB.504153.360	Q4E2P8	-1.43894	0.113746	Succinyl-CoA:3-ketoacid-coenzyme A transferase
TcCLB.511545.40	Q4DMS7	-1.43928	0.223718	Ribosomal protein L27, putative
TcCLB.506831.40	Q4D4C9	-1.44035	0.0340255	3-hydroxy-3-methylglutaryl coenzyme A reductase
TcCLB.508731.60	Q4CWX1	-1.44382	0.161607	Adenylosuccinate synthetase 2
TcCLB.511815.170	Q4DJ92	-1.44638	0.127186	Uncharacterized protein
TcCLB.511487.30	Q4DS00	-1.44902	0.305392	Dispersed gene family protein 1 (DGF-1), putative
TcCLB.510879.110	Q4DJX1	-1.4499	0.1265	Ribosomal protein L3, putative
TcCLB.511333.4	Q4CP00	-1.45012	0.108762	Cytoskeleton-associated protein CAP5.5, putative (Fragment)
TcCLB.504427.110	Q4DYN2	-1.45187	0.228271	Acetyl-coenzyme A synthetase
TcCLB.506925.120	Q4E4N4	-1.45599	0.0748765	Eukaryotic translation initiation factor 5A
TcCLB.507611.110	Q4E3H1	-1.45904	0.14082	Retrotransposon hot spot (RHS) protein, putative
TcCLB.511015.20	Q4CMS5	-1.46448	0.0175533	Ribosomal protein S29, putative
TcCLB.459199.10	Q4CQ60	-1.46955	0.119544	Retrotransposon hot spot (RHS) protein, putative
TcCLB.510101.30	Q4E3Q5	-1.47066	0.0530444	60S ribosomal protein L28, putative
TcCLB.511367.170	Q4DYH5	-1.47513	0.199494	Vacuolar protein sorting-associated protein 35
TcCLB.509149.40	Q4D169	-1.47994	0.132641	60S ribosomal protein L19, putative
TcCLB.507089.170	Q4DWM7	-1.48167	0.224591	Uncharacterized protein
TcCLB.504121.39	Q4CQW1	-1.48329	0.137303	60S ribosomal protein L14, putative (Fragment)
RPL18	Q4DZP2	-1.48351	0.18779	60S ribosomal protein L18
TcCLB.511369.10	Q4CRF7	-1.48393	0.0841958	Elongation factor 1-alpha
TcCLB.508271.10	Q4CXE3	-1.4849	0.192442	Phenylalanyl-tRNA synthetase, putative
TcCLB.511311.80	Q4DLD9	-1.49027	0.0753048	Uncharacterized protein (Fragment)
TcCLB.506743.4	Q4DPQ3	-1.49591	0.193195	Eukaryotic translation initiation factor 1A, putative (Fragment)
TcCLB.506321.290	Q4DYD9	-1.49797	0.0873887	Stress-induced protein sti1, putative
TcCLB.503453.40	Q4D8K3	-1.50183	0.0499964	60S ribosomal protein L30, putative
TcCLB.510325.69	Q4CXX8	-1.50242	0.1665	Aminopeptidase, putative (Fragment)
TcCLB.508231.20	Q4DW69	-1.50644	0.0192318	40S ribosomal protein S12
TcCLB.510119.20	Q4CXI1	-1.50781	0.0818772	Elongation factor 1-alpha
TcCLB.509065.160	Q4DHE0	-1.51177	0.102284	Eukaryotic translation initiation factor 3 subunit 7-like protein, putative
TcCLB.510983.19	Q4CT80	-1.51191	0.0448757	Retrotransposon hot spot (RHS) protein, putative
TcCLB.506581.30	Q4CY21	-1.51241	0.192172	Eukaryotic translation initiation factor 3 (EIF-3) interacting protein, putative
TcCLB.509997.30	Q4D1B8	-1.51392	0.0435548	Tryparedoxin, putative
TcCLB.511051.70	Q4D5P1	-1.51394	0.103619	Aminopeptidase
TcCLB.509831.33	Q4D0R5	-1.51395	0.153787	Uncharacterized protein
TcCLB.507625.10	Q4DPF1	-1.51888	0.0782797	Retrotransposon hot spot (RHS) protein, putative
TcCLB.509207.40	Q4DH64	-1.52305	0.197488	Uncharacterized protein
TcCLB.508373.10	Q4CSV9	-1.52446	0.0687279	Glutamine dependent carbamoyl-phosphate synthase, putative (Fragment)
TcCLB.509843.10	Q4CYS6	-1.52972	0.224163	Retrotransposon hot spot (RHS) protein, putative (Fragment)
TcCLB.504001.20	Q4CW22	-1.53288	0.0976821	Uncharacterized protein
TcCLB.507615.73	Q4DN30	-1.5362	0.168498	Uncharacterized protein
TcCLB.511581.10	Q4CN21	-1.53632	0.0188359	Fatty acyl CoA synthetase 2, putative (Fragment)
TcCLB.506585.40	Q4D620	-1.53954	0.0665706	Glucose-regulated protein 78, putative
TcCLB.507029.30	Q4CVR9	-1.54512	0.0482104	Heat shock 70 kDa protein, mitochondrial, putative
TcCLB.506845.60	Q4D0T5	-1.54902	0.117848	Retrotransposon hot spot (RHS) protein, putative
TcCLB.508601.141	Q4DBP7	-1.55037	0.161017	Dipeptidyl-peptidase, putative (Fragment)
TcCLB.506725.20	Q4D965	-1.55444	0.212488	Uncharacterized protein
TcCLB.511211.170	Q4DTM8	-1.55594	0.0496178	Heat shock protein 70 (HSP70), putative
TcCLB.510463.190	Q4DZ47	-1.56378	0.183868	Retrotransposon hot spot (RHS) protein, putative
TcCLB.507675.10	Q4CU84	-1.56465	0.113053	Uncharacterized protein (Fragment)
TcCLB.508325.60	Q4E0I5	-1.56469	0.0317947	Retrotransposon hot spot (RHS) protein, putative
TcCLB.506629.40	Q4DQE0	-1.56471	0.134432	Uncharacterized protein
TcCLB.506247.10	Q4E156	-1.56525	0.162443	Protein disulfide isomerase, putative (Fragment)
TcCLB.508175.329	Q4E2W4	-1.56994	0.0869889	60S ribosomal protein L19, putative
TcCLB.506355.10	Q4DKD0	-1.57279	0.135943	Hexose transporter, putative
TcCLB.508153.20	Q4E689	-1.57302	0.263163	Dynamin, putative
TcCLB.508059.50	Q4CXY8	-1.57433	0.0685495	Uncharacterized protein
TcCLB.510889.221	Q4E2M9	-1.57474	0.153219	Glucose-6-phosphate isomerase
TcCLB.510439.61	Q4CU95	-1.57546	0.0518118	Heat shock 70 kDa protein, putative (Fragment)
TcCLB.506885.400	Q4E4G0	-1.57824	0.0221502	40 kDa cyclophilin, putative
TcCLB.506261.10	Q4CMD9	-1.59016	0.0800976	Fatty acyl CoA synthetase 2, putative
TcCLB.508153.1050	Q4E5Z1	-1.60006	0.0600086	Uncharacterized protein
TcCLB.507393.9	Q4CSF7	-1.60254	0.242958	Dispersed gene family protein 1 (DGF-1), putative (Fragment)
TcCLB.509429.320	Q4E0J7	-1.60798	0.105013	Cysteineptidase, putative
TcCLB.510165.110	Q4D923	-1.61136	0.121885	Retrotransposon hot spot (RHS) protein, putative
TcCLB.503815.10	Q4CRU8	-1.61699	0.150517	Alkyl-dihydroxyacetone phosphate synthase, putative
TcCLB.510771.9	Q4CWT0	-1.6196	0.22757	Uncharacterized protein (Fragment)
TcCLB.506529.508	Q4E5N1	-1.62232	0.113518	Glucose-6-phosphate isomerase
TcCLB.503855.30	Q4DBH5	-1.62373	0.213146	Adenylosuccinate lyase
TcCLB.508277.230	Q4E0X3	-1.62515	0.0520256	Nucleolar RNA binding protein, putative
TcCLB.506441.20	Q4CSI2	-1.62606	0.0863577	Uncharacterized protein
TcCLB.503819.30	Q4CPV7	-1.62785	0.0316239	Eukaryotic translation initiation factor 2 subunit, putative
TcCLB.509611.160	Q4DK90	-1.6294	0.0759273	Proteasome regulatory non-ATPase subunit, putative
TcCLB.506017.51	Q4CX54	-1.63431	0.0722213	Retrotransposon hot spot (RHS) protein, putative (Fragment)
TcCLB.511131.80	Q4DA60	-1.64015	0.150655	Uncharacterized protein
TcCLB.494675.10	Q4CLW0	-1.64224	0.0287457	Fatty acyl CoA synthetase 2, putative (Fragment)
TcCLB.510823.70	Q4D991	-1.64283	0.103495	60S acidic ribosomal protein, putative
TcCLB.508085.10	Q4CNX6	-1.64708	0.166943	GMP synthase, putative (Fragment)
TcCLB.509903.5	Q4CZV4	-1.64797	0.0958192	Retrotransposon hot spot (RHS) protein, putative (Fragment)
TcCLB.508265.100	Q4D770	-1.64923	0.0954347	Uncharacterized protein
TcCLB.509051.20	Q4CVL1	-1.65078	0.0977169	Amastin, putative
TcCLB.509965.110	Q4E0V0	-1.65279	0.219788	Importin subunit alpha
TcCLB.508083.10	Q4CRR1	-1.65593	0.185437	Uncharacterized protein
TcCLB.506327.10	Q4DBH0	-1.6583	0.242875	Proteasome endopeptidase complex (Fragment)
TcCLB.511127.110	Q4E408	-1.66898	0.148864	Heat shock protein HslVU, ATPase subunit HslU, putative
TcCLB.424123.20	Q4CP97	-1.67502	0.26312	Uncharacterized protein
TcCLB.509797.40	Q4D2F2	-1.68479	0.0770793	Isoleucyl-tRNA synthetase, putative
TcCLB.506247.330	Q4E122	-1.68984	0.136162	2,3-bisphosphoglycerate-independent phosphoglycerate mutase, putative
TcCLB.511165.50	Q4D5E3	-1.72661	0.224084	Uncharacterized protein
TcCLB.508881.120	Q4DMH3	-1.72876	0.0690895	Prefoldin subunit 3
TcCLB.508955.20	Q4CM92	-1.73071	0.0723006	Uncharacterized protein
TcCLB.509683.130	Q4DLT0	-1.73095	0.0940634	Aminopeptidase, putative (Fragment)
TcCLB.504199.20	Q4CVJ1	-1.74153	0.0686707	Uncharacterized protein
TcCLB.507225.10	Q4CPT5	-1.7455	0.0587257	Retrotransposon hot spot (RHS) protein, putative
TcCLB.508971.50	Q4D7V1	-1.75886	0.111998	Ubiquitin-protein ligase-like, putative
TcCLB.506297.220	Q4E0P7	-1.7656	0.0498828	Uncharacterized protein
TcCLB.507681.150	Q4DW38	-1.76574	0.144189	40S ribosomal protein S24
TcCLB.506413.20	Q4CXV7	-1.77124	0.0792023	40S ribosomal protein S33, putative
TcCLB.507483.30	Q4D139	-1.78533	0.170169	Calmodulin, putative
TcCLB.509585.10	Q4CX46	-1.8036	0.113652	Dynein heavy chain, putative (Fragment)
TcCLB.506855.310	Q4E1R5	-1.80444	0.102933	Uncharacterized protein
TcCLB.506677.10	Q4CPK3	-1.80838	0.152954	Ubiquitin-like protein, putative
TcCLB.509775.40	Q4DCQ3	-1.8159	0.212548	Superoxide dismutase
TcCLB.507061.30	Q4D9I5	-1.81627	0.22015	Superoxide dismutase
TcCLB.504103.20	Q4DBX3	-1.82592	0.0996588	Uncharacterized protein
TcCLB.511301.70	Q4DM85	-1.84026	0.067305	Peptidylprolyl isomerase
TcCLB.511825.220	Q4DQ33	-1.84072	0.0791175	Alanine--tRNA ligase
TcCLB.503655.20	Q4D8Y4	-1.8594	0.157992	Dispersed gene family protein 1 (DGF-1), putative
TcCLB.510743.10	Q4D7C0	-1.86452	0.137028	Ubiquitin-activating enzyme E1, putative (Fragment)
TcCLB.506239.30	Q4D030	-1.87419	0.129205	Lectin, putative
TcCLB.508277.120	Q4CQQ9	-1.90113	0.0793883	Ribosomal protein S6, putative
TcCLB.506559.550	Q4E573	-1.90134	0.124627	Uncharacterized protein
TcCLB.504047.5	Q4D7U3	-1.92443	0.151172	Urocanate hydratase, putative (Fragment)
TcCLB.507483.50	Q4D137	-1.96782	0.137066	Calmodulin
TcCLB.507005.60	Q4D2P9	-1.9981	0.152752	Structural maintenance of chromosomes protein
TcCLB.508543.90	Q4DSJ2	-2.00006	0.153414	Calcium-transporting ATPase
#These identifications were filtered out by the L-stringency and so deserve further experimentation to verify if they are indeed differentially expressed
TcCLB.511051.59	Q4D5P2	5.19306	0.0037518	Uncharacterized protein
TcCLB.511807.280	Q4E1B7	4.63608	0.00482525	Uncharacterized protein
TcCLB.505071.110	Q4DER7	3.96963	0.0110904	Uncharacterized protein
TcCLB.506925.480	Q4E4K4	3.95602	0.0167712	Ribokinase
TcCLB.511003.190	Q4DNT1	3.75131	0.018629	Uncharacterized protein
TcCLB.503769.40	Q4CXC3	3.60657	0.0196934	Cytochrome c oxidase VII, putative
TcCLB.508823.70	Q4D6I3	3.58038	0.0127733	Uncharacterized protein
TcCLB.511367.290	Q4DYG6	3.45231	0.0210724	Uncharacterized protein
TcCLB.508839.30	Q4D5L3	3.4234	0.0296041	Trafficking protein particle complex subunit 3, putative
TcCLB.506357.90	Q4E5J2	3.39968	0.0356252	DNA-directed RNA polymerases II, putative
TcCLB.509167.80	Q4DQQ9	3.31741	0.00424447	Uncharacterized protein
TcCLB.508515.20	Q4DM75	3.28787	0.0209507	Protein translation factor SUI1 homolog, putative
TcCLB.509979.150	Q4E2D4	3.28321	0.0242935	Nitrilase, putative
TcCLB.510877.60	Q4DPV3	3.17394	0.00663353	RuvB-like helicase
TcCLB.511491.100	Q4DHP0	3.10488	0.0271646	Phosphatase 2C, putative
TcCLB.510885.160	Q4DP43	3.07588	0.00632964	Uncharacterized protein
TcCLB.503499.10	Q4CS20	3.04254	0.0182493	Uncharacterized protein
TcCLB.507993.330	Q4E1U8	2.8859	0.00729017	Diphosphomevalonate decarboxylase
TcCLB.505919.80	Q4D8B1	2.77575	0.0495871	Retrotransposon hot spot (RHS) protein, putative
TcCLB.503841.70	Q4D080	2.74702	0.0140815	Aspartate aminotransferase
TcCLB.509553.30	Q4D0B0	2.7065	0.0417574	Ribonuclease mar1, putative
TcCLB.508569.90	Q4DHI4	2.65224	0.0489001	Uncharacterized protein
TcCLB.506989.160	Q4DW91	2.63223	0.0118157	Peroxisomal targeting signal type 2 receptor, putative
TcCLB.509203.40	Q4D8L7	2.52434	0.0336866	Glycosomal membrane protein, putative
TcCLB.508351.10	Q4CUP1	2.46599	0.00240877	Fructose-1,6-bisphosphatase, cytosolic, putative
TcCLB.511261.140	Q4DL18	2.34032	0.0275265	60S ribosomal protein L34, putative
TcCLB.508873.399	Q4E503	2.33487	0.0211651	Elongation factor 1-gamma (EF-1-gamma), putative
TcCLB.511367.70	Q4DYI5	2.3318	0.0370971	Dihydrolipoamide acetyltransferase, putative
TcCLB.509937.150	Q4DSP9	2.28464	0.0248683	Serine hydroxymethyltransferase
TcCLB.508347.159	Q4DSW8	2.25892	0.0467688	Mitotubule-associated protein Gb4, putative (Fragment)
TcCLB.506559.300	Q4E5A0	2.19056	0.0356916	G-actin binding protein, putative
TcCLB.509051.30	Q4CVL0	2.18099	0.0339684	dTDP-glucose 4,6-dehydratase, putative
TcCLB.511867.50	Q4DKR1	2.14248	0.0398969	Proteasome endopeptidase complex
TcCLB.508851.59	Q4DJC9	2.11499	0.00718338	ATP synthase, putative
TcCLB.509769.60	Q4DKU9	2.05237	0.0403082	Uncharacterized protein
TcCLB.506195.80	Q4DXL7	2.01743	0.0361318	Adenylate kinase, putative
TcCLB.503677.10	Q4CSB0	2.01715	0.00360761	Mannose-6-phosphate isomerase
TcCLB.510997.40	Q4CWM5	1.98818	0.00670132	Enoyl-CoA hydratase/isomerase family protein, putative
TcCLB.511281.40	Q4D9Z9	1.952	0.0306829	Diphosphomevalonate decarboxylase
TcCLB.510055.50	Q4DMN4	1.94933	0.0391813	Uncharacterized protein
TcCLB.506649.70	Q4DE31	1.89861	0.00170159	Fructose-1,6-bisphosphatase, cytosolic, putative
TcCLB.503613.20	Q4CYK5	1.84894	0.020145	Proteasome subunit alpha type
TcCLB.511717.90	Q4DJV2	1.84477	0.0146248	Mannose-6-phosphate isomerase
TcCLB.503679.10	Q4CRK6	1.82252	0.0101145	Aspartate aminotransferase
TcCLB.508741.140	Q4CVT7	1.80706	0.0472745	Imidazolonepropionase, putative
TcCLB.510515.139	Q4DEW6	1.71361	0.00365421	T-complex protein 1 gamma subunit, putative (Fragment)
TcCLB.503989.10	Q4D7N5	1.69747	0.0113306	Zinc finger protein 2, putative
TcCLB.510689.30	Q4D579	1.62753	0.0148014	Proteasome subunit beta
TcCLB.506953.49	Q4CZI4	1.47075	0.00845627	Glucose-6-phosphate 1-dehydrogenase, putative (Fragment)
GMPR	Q4DFE7	-1.993	0.0480838	GMP reductase
TcCLB.504143.10	Q4CPN7	-2.0142	0.0381799	Uncharacterized protein (Fragment)
TcCLB.509177.30	Q4CXU1	-2.09136	0.0499838	RNA cytidine acetyltransferase
TcCLB.511033.29	Q4CS68	-2.11651	0.0302473	Uncharacterized protein (Fragment)
TcCLB.510101.350	Q4E3M6	-2.12252	0.0286367	Uncharacterized protein
TcCLB.507765.130	Q4DFT9	-2.13429	0.0197625	Uncharacterized protein
TcCLB.511825.200	Q4DQ35	-2.18459	0.0407632	40S ribosomal protein L14, putative
TcCLB.506177.10	Q4DHU1	-2.19538	0.0320511	Uncharacterized protein
TcCLB.506591.20	Q4D7U8	-2.21073	0.027339	U-box domain protein, putative
TcCLB.506885.70	Q4E4I9	-2.25558	0.0197582	Polyadenylate-binding protein
TcCLB.509167.140	Q4DQQ3	-2.26579	0.0330509	Uncharacterized protein
TcCLB.506147.190	Q4DT88	-2.27606	0.039616	Uncharacterized protein
TcCLB.511731.60	Q4D7F9	-2.28175	0.0344271	Glutamyl-tRNA synthetase, putative
GMPR	Q4E1M2	-2.33389	0.0323751	GMP reductase
TcCLB.504741.20	Q4DTU3	-2.41915	0.0456367	Obg-like ATPase 1
TcCLB.508153.730	Q4E620	-2.46684	0.00117409	Elongation initiation factor 2 alpha subunit, putative
TcCLB.506863.10	Q4D747	-2.48757	0.0320302	Alanine--tRNA ligase
TcCLB.506249.70	Q4CX07	-2.50668	0.0286527	ABC transporter, putative
TcCLB.510741.229	Q4DRK7	-2.54005	0.0472266	Ubiquitin-activating enzyme E1, putative (Fragment)
TcCLB.507963.79	Q4D5X8	-2.60388	0.0129717	Nucleosome assembly protein, putative
TcCLB.510647.30	Q4CTS7	-2.60889	0.0403323	Tryptophanyl-tRNA synthetase, putative
TcCLB.508995.40	Q4D9R1	-2.64628	0.0336752	Vesicle-fusing ATPase, putative
TcCLB.510313.20	Q4CLT8	-2.69639	0.0322261	Uncharacterized protein (Fragment)
TcCLB.504105.20	Q4DZB0	-2.93603	0.0253538	Eukaryotic translation initiation factor 5, putative
TcCLB.510531.54	Q4DCM8	-2.97877	0.0353636	Small nuclear ribonucleoprotein, putative
TcCLB.506753.110	Q4DLY0	-2.98613	0.0123889	Cytochrome b5-like, putative
TcCLB.510685.10	Q4CPZ0	-2.99673	0.0423607	Calreticulin, putative
TcCLB.507795.10	Q4D094	-3.00817	0.021178	Membrane associated protein, putative (Fragment)
TcCLB.506989.210	Q4DW87	-3.13809	0.0200981	U-box domain protein, putative
TcCLB.507031.29	Q4DSA7	-3.24534	0.00650945	Nucleosome assembly protein, putative
TcCLB.511693.90	Q4DG52	-3.28116	0.00626015	Electron-transfer-flavoprotein, alpha polypeptide, putative
TcCLB.485683.10	Q4CL38	-3.28192	0.00570631	Uncharacterized protein
TcCLB.508837.80	Q4DUG1	-3.56831	0.00214288	Uncharacterized protein
TcCLB.510309.50	Q4D4B8	-3.90065	0.0250014	60S acidic ribosomal protein P2, putative
TcCLB.506123.40	Q4CYD2	-5.35751	0.0332441	Nucleolar RNA helicase II, putative
TcCLB.506691.14	Q4D976	-5.6865	0.00307557	ATP-dependent DEAD/H RNA helicase, putative (Fragment)

## Sheet: Pd-dppf-mpo unique sol prot
Pd-dppf-mpo unique soluble proteins (ONLY CONTROL)
Gene ID	Uniprot ID	Replicate Count	Total Signal	Description
TcCLB.507649.80	Q4DHV9	3	38	Nucleolar RNA-binding protein, putative
TcCLB.503999.50	Q4D439	3	37	Ubiquitin-conjugating enzyme-like, putative
TcCLB.509213.40	Q4DGY4	3	36	Uncharacterized protein
TcCLB.504505.20	Q4CQM8	3	36	Retrotransposon hot spot (RHS) protein, putative
TcCLB.509597.20	Q4CVY4	3	33	Carbonic anhydrase-like protein, putative
TcCLB.510663.19	Q4D0Y0	3	33	60S ribosomal subunit protein L31, putative
TcCLB.503999.30	Q4DGD9	3	30	Uncharacterized protein
TcCLB.511649.70	Q4DL10	3	25	Structural maintenance of chromosomes protein
TcCLB.508347.120	Q4DSX2	3	20	Uncharacterized protein
TcCLB.506247.70	Q4E149	3	20	Nuclear pore complex protein (NUP155), putative
TcCLB.511529.68	Q4DMY8	3	18	Cyclin-dependent kinases regulatory subunit
TcCLB.510687.149	Q4D9X2	3	18	Coatomer alpha subunit, putative (Fragment)
TcCLB.508041.60	Q4CXW9	3	18	Eukaryotic release factor 3, putative
TcCLB.506573.30	Q4D3K0	3	18	Tyrosyl or methionyl-tRNA synthetase, putative
TcCLB.511189.80	Q4D851	3	18	Small nuclear ribonucleoprotein SmD2, putative
TcCLB.508257.150	Q4DX43	3	17	Small nuclear ribonucleoprotein SmD3, putative
TcCLB.511381.60	Q4D131	3	15	Uncharacterized protein
TcCLB.509695.90	Q4DTR0	3	15	Uncharacterized protein
TcCLB.506825.210	Q4DZE2	3	14	Uncharacterized protein
TcCLB.511527.70	Q4D5J9	3	14	Myosin heavy chain, putative
TcCLB.507511.40	Q4D3H6	3	14	Uncharacterized protein
TcCLB.508323.20	Q4DFM2	3	14	Uncharacterized protein
TcCLB.509793.30	Q4CY62	2	25	Kinetoplast DNA-associated protein, putative
TcCLB.507585.10	Q4CPV4	2	24	Amino acid transporter, putative
TcCLB.506839.70	Q4DCU2	2	21	NADH dehydrogenase, putative
TcCLB.511409.10	Q4D2A8	2	21	Uncharacterized protein
TcCLB.509551.30	Q4DJJ9	2	21	Mitochondrial phosphate transporter, putative
TcCLB.509589.20	Q4D1U2	2	18	Squalene monooxygenase, putative
TcCLB.509875.11	Q4E0D4	2	17	Retrotransposon hot spot (RHS) protein, putative (Fragment)
TcCLB.504017.10	Q4D103	2	16	Nascent polypeptide-associated complex subunit beta
TcCLB.510519.149	Q4DEA1	2	15	Uncharacterized protein (Fragment)
TcCLB.510861.14	Q4DPH9	2	15	Uncharacterized protein (Fragment)
TcCLB.508405.30	Q4D5H3	2	15	Phosphatase-like protein, putative
TcCLB.511907.200	Q4DY71	2	14	Cysteine peptidase inhibitor, putative
TcCLB.506517.149	Q4DDA3	2	14	Uncharacterized protein
TcCLB.511807.200	Q4E1C5	2	14	Uncharacterized protein
TcCLB.508045.70	Q4DIN9	2	14	Uncharacterized protein
TcCLB.509331.200	Q4DQX1	2	14	ABC transporter, putative
TcCLB.509965.250	Q4E0T5	2	13	Ubiquitin fusion degradation protein 2, putative
TcCLB.506211.240	Q4DYJ4	2	13	Clathrin light chain
TcCLB.510409.39	Q4D1T6	2	13	Ubiquitin/ribosomal protein S27a, putative
TcCLB.508989.90	Q4DAD2	2	13	Uncharacterized protein
TcCLB.507949.4	Q4DS18	2	12	Cytidine triphosphate synthase, putative (Fragment)
TcCLB.506513.100	Q4DPI7	2	12	Uncharacterized protein
TcCLB.506945.240	Q4DX76	2	12	ATP synthase, epsilon chain, putative
TcCLB.505943.40	Q4DMM2	2	12	Uncharacterized protein
TcCLB.508507.50	Q4CZP5	2	11	Uncharacterized protein
TcCLB.510307.330	Q4E0M6	2	11	Dispersed gene family protein 1 (DGF-1), putative
TcCLB.506297.350	Q4CXX4	2	11	S-phase kinase-associated protein, putative
TcCLB.506753.230	Q4DLW7	2	11	Uncharacterized protein
TcCLB.509777.70	Q4DIM7	2	10	Calcium-transporting ATPase
TcCLB.506203.129	Q4DN02	2	10	Mitochondrial DNA-directed RNA polymerase, putative (Fragment)
TcCLB.506789.160	Q4DZX3	2	10	Uncharacterized protein
TcCLB.506127.150	Q4DP85	2	10	Uncharacterized protein
TcCLB.508879.30	Q4DXF3	2	10	Dynein heavy chain, putative
TcCLB.510315.10	Q4CRT0	2	10	Inosine-adenosine-guanosine-nucleoside hydrolase, putative
TcCLB.511535.20	Q4CTW7	2	10	Uncharacterized protein
TcCLB.506811.160	Q4DV01	2	10	R27-2 protein, putative
TcCLB.506829.100	Q4DD92	2	10	Fatty acyl CoA syntetase 1, putative
TcCLB.510607.80	Q4DHR5	2	9	Dispersed gene family protein 1 (DGF-1), putative
TcCLB.508257.170	Q4DX41	2	9	Dynein heavy chain, putative
TcCLB.507601.10	Q4DDM9	2	9	Serine/threonine-protein phosphatase
TcCLB.507583.20	Q4CX97	2	9	Nucleolar protein, putative
TcCLB.510285.20	Q4DIT5	2	9	Uncharacterized protein
TcCLB.506211.114	Q4DYK7	2	9	Kinesin-like protein
TcCLB.507709.120	Q4DIV2	2	9	Uncharacterized protein
TcCLB.510943.80	Q4DRT5	2	9	ABC transporter, putative
TcCLB.510861.40	Q4DPH7	2	8	Uncharacterized protein
TcCLB.508173.180	Q4DV68	2	8	Nuclear transport factor 2 protein(NFT2), putative
TcCLB.508231.170	Q4DW59	2	8	Uncharacterized protein
TcCLB.506465.14	Q4D6M6	2	8	Uncharacterized protein
TcCLB.504147.330	Q4DZL6	2	8	Uncharacterized protein
TcCLB.503593.30	Q4D509	2	8	Uncharacterized protein
TcCLB.508153.330	Q4E658	2	8	Katanin-like protein, putative
TcCLB.506201.120	Q4DG77	2	8	Uncharacterized protein
TcCLB.510123.20	Q4CZQ7	2	8	Mitogen activated protein kinase, putative
TcCLB.507897.30	Q4CXF6	2	8	Serine/threonine-protein kinase A, putative
TcCLB.509767.70	Q4DSC7	2	8	V-type proton ATPase subunit a
TcCLB.503513.40	Q4CSX0	2	8	Proteasome regulatory non-ATPase subunit 6, putative (Fragment)
TcCLB.508895.80	Q4DCC4	2	8	Intraflagellar transport protein component, putative
TcCLB.509445.30	Q4CR19	2	8	Farnesyl synthetase, putative
TcCLB.511287.160	Q4DIZ4	2	8	Clathrin light chain
TcCLB.510655.30	Q4DFY7	2	7	Helicase, putative
TcCLB.511823.79	Q4CXZ7	2	7	Uncharacterized protein (Fragment)
TcCLB.507769.30	Q4CNZ3	2	7	Uncharacterized protein
TcCLB.507807.10	Q4CY33	2	7	Uncharacterized protein (Fragment)
TcCLB.506327.90	Q4DBG2	2	7	Serine/threonine protein kinase, putative
TcCLB.504867.20	Q4DEI4	2	7	ABC transporter, putative
TcCLB.507771.90	Q4DCL3	2	7	Uncharacterized protein
TcCLB.511807.290	Q4E1B5	2	6	Uncharacterized protein
TcCLB.510431.220	Q4DXX2	2	6	Uncharacterized protein
TcCLB.511725.180	Q4DWH2	2	6	Dynein, putative
TcCLB.507003.60	Q4CXM2	2	6	Uncharacterized protein
TcCLB.506829.90	Q4DD93	2	4	Uncharacterized protein
TcCLB.509693.170	Q4DRB4	2	4	Uncharacterized protein
Pd-dppf-mpo unique soluble proteins (ONLY TREATED)
Gene ID	Uniprot ID	Replicate Count	Total Signal	Description
TcCLB.506479.20	Q4CW49	3	21	Uncharacterized protein
TcCLB.511817.40	Q4DYC3	3	19	NADH-cytochrome b5 reductase
TcCLB.506511.20	Q4D4R1	3	19	Uncharacterized protein
TcCLB.507649.10	Q4DHW5	3	16	Uncharacterized protein
TcCLB.511751.200	Q4DVU3	3	12	Epsilon-adaptin, putative
TcCLB.509489.29	Q4CPL0	3	8	Proteasome regulatory non-ATP-ase subunit, putative (Fragment)
TcCLB.506587.40	Q4D8X3	2	19	ATP-dependent DEAD/H RNA helicase, putative
TcCLB.506791.50	Q4DCX1	2	18	Uncharacterized protein
TcCLB.508813.60	Q4D6Y1	2	17	Uncharacterized protein
TcCLB.509601.100	Q4DK75	2	15	Uncharacterized protein
TcCLB.508465.110	Q4DHU6	2	14	Acyl-CoA dehydrogenase, putative
TcCLB.506337.180	Q4DKX3	2	14	Uncharacterized protein
TcCLB.508303.65	Q4DDZ3	2	13	Thioredoxin-like protein, putative
TcCLB.510357.70	Q4DBV7	2	13	Ubiquinone biosynthesis protein COQ4 homolog 1, mitochondrial
TcCLB.511367.129	Q4DYH8	2	12	Uncharacterized protein
TcCLB.509065.124	Q4DHE4	2	12	U6 snRNA-associated Sm-like protein LSm5p
TcCLB.511211.220	Q4DTM3	2	12	Heat shock protein 70, putative
TcCLB.507801.179	Q4DPK8	2	11	Vesicle-associated membrane protein, putative
TcCLB.510955.40	Q4CZ83	2	11	Axoneme central apparatus protein, putative
TcCLB.511393.49	Q4D3C0	2	10	Uncharacterized protein
TcCLB.506977.60	Q4DBY3	2	10	Uncharacterized protein
TcCLB.508547.180	Q4DRE9	2	10	Uncharacterized protein
TcCLB.506401.190	Q4E3S4	2	10	Uncharacterized protein
TcCLB.503745.30	Q4CRX7	2	9	Ascorbate-dependent peroxidase, putative
TcCLB.507993.70	Q4E1X1	2	9	Uncharacterized protein
TcCLB.511801.30	Q4D7I1	2	8	Uncharacterized protein
TcCLB.511573.20	Q4CU34	2	7	Uncharacterized protein
TcCLB.504109.90	Q4DR39	2	7	Ubiquitin carboxyl-terminal hydrolase
TcCLB.511233.100	Q4DN64	2	6	Nudix hydrolase, putative
TcCLB.506691.80	Q4D968	2	6	Uncharacterized protein
TcCLB.508445.10	Q4D4J6	2	5	Rab11B GTPase, putative

## Sheet: Pd-dppf-mpo insol prot detected
Pd-dppf-mpo insoluble protein detected
Gene ID	Uniprot ID	Fold Change	pValue	Description
#Identifications satisfied both, the automatic fold and statistical criteria.
TcCLB.506147.190	Q4DT88	4.49148	0.014914	Uncharacterized protein
TcCLB.511389.150	Q4DIT6	2.66919	0.00862242	Thiolase protein-like protein, putative
TcCLB.509247.30	Q4D6H3	2.32754	0.00363144	Uncharacterized protein
TcCLB.509445.39	Q4CR18	2.09287	0.00265424	Glutamate dehydrogenase, putative (Fragment)
TcCLB.509701.10	Q4CLW3	2.04433	0.0487267	Trifunctional enzyme alpha subunit, mitochondrial-like protein, putative (Fragment)
TcCLB.508719.70	Q4D3F7	1.94827	0.0456791	Uncharacterized protein
TcCLB.506625.60	Q4DUD6	1.93518	0.0129198	Inositol 5-phosphatase 1, putative
TcCLB.510089.110	Q4DQZ8	1.89474	0.0158185	Uncharacterized protein
TcCLB.508461.500	Q4E4Q8	1.7262	0.00303616	60S ribosomal protein L27A/L29, putative
TcCLB.503577.20	Q4CM27	1.70987	0.00798796	U2 splicing auxiliary factor, putative
TcCLB.504163.50	Q4D4R9	1.69895	0.000803671	Fructose-bisphosphate aldolase
TcCLB.504105.94	Q4DTX6	1.69573	0.0010234	Ribosomal protein S25, putative
TcCLB.507919.10	Q4CP24	1.68028	0.0308227	Surface protease GP63, putative
TcCLB.506405.149	Q4DED2	1.65614	0.00117357	Ribosomal protein L21E (60S), putative
TcCLB.508153.280	Q4E661	1.62689	0.019118	60S ribosomal protein L13
TcCLB.506861.30	Q4CTR5	1.62673	0.0180299	40S ribosomal protein L14, putative
TcCLB.506481.20	Q4CZY9	1.59125	0.0480635	Uncharacterized protein
TcCLB.510187.160	Q4E4D5	1.59046	0.0210916	Developmentally regulated GTP-binding protein, putative
TcCLB.506155.30	Q4DFG6	1.54034	0.0222492	Kinesin-like protein, putative
TcCLB.504181.20	Q4DTQ1	1.52121	0.0120716	40S ribosomal protein S23, putative
TcCLB.510835.40	Q4D531	1.48613	0.0103697	60S ribosomal protein L7a, putative
TcCLB.503801.20	Q4CYE4	1.48264	0.0093142	40S ribosomal protein S26
TcCLB.506315.50	Q4D7A0	1.47523	0.00965246	60S ribosomal protein L13a, putative
TcCLB.506957.90	Q4DKZ4	1.47024	0.00555541	60S ribosomal protein L18a
TcCLB.508197.10	Q4CNF4	1.45462	0.013443	60S ribosomal protein L11, putative
TcCLB.507519.110	Q4DNZ7	1.45381	0.018057	60S ribosomal protein L7, putative
TcCLB.511323.40	Q4CY73	1.43614	0.00373585	Histone H2A
TcCLB.509671.80	Q4CU61	1.424	0.00936368	60S ribosomal protein L5, putative
TcCLB.510101.330	Q4E3M8	1.41546	0.0109201	Uncharacterized protein
TcCLB.506977.49	Q4DBY4	1.36383	0.00383867	Ribosomal proteins L36, putative
TcCLB.508981.39	Q4CWB6	1.35286	3.62384e-05	Trifunctional enzyme alpha subunit, mitochondrial-like protein (Fragment)
TcCLB.503635.59	Q4D2R9	1.2281	0.00104537	40S ribosomal protein S3a-1
TcCLB.509693.80	Q4DRC3	-1.46115	0.00713586	Hypoxanthine-guanine phosphoribosyltransferase, putative
TcCLB.504427.260	Q4DYM0	-1.60312	0.00753502	Kinesin-like protein
TcCLB.510761.60	Q4DG40	-1.63828	0.0316036	Casein kinase II, putative
TcCLB.508319.30	Q4D0V0	-1.70256	0.0401308	Uncharacterized protein
TcCLB.509649.50	Q4CYA4	-1.71941	0.0349338	Uncharacterized protein
TcCLB.507093.300	Q4E1M8	-1.88245	0.0297661	Uncharacterized protein
TcCLB.504005.54	Q4CY42	-1.91273	0.0180665	Uncharacterized protein
TcCLB.508479.120	Q4E2L2	-1.95602	0.00734242	Pumilio/PUF RNA binding protein 8, putative
TcCLB.511583.40	Q4CVF7	-2.03027	0.0492408	Tricarboxylate carrier, putative
TcCLB.505183.30	Q4DJ68	-2.4755	0.0215633	Malic enzyme
TcCLB.510089.210	Q4DQZ1	-3.83778	0.0216647	Uncharacterized protein
TcCLB.509229.80	Q4DI18	-3.87925	0.028787	Mitochondrial processing peptidase alpha subunit, putative
TcCLB.506735.10	Q4DB63	-4.37436	0.0336412	Mitochondrial processing peptidase alpha subunit, putative
TcCLB.507609.60	Q4DFC2	-4.46047	0.00824801	Myo-inositol-1-phosphate synthase, putative
TcCLB.504017.10	Q4D103	-5.16371	0.000325582	Nascent polypeptide-associated complex subunit beta
#These identifications satisfied the fold criteria but, most likely, this happened by chance (should be disconsidered).
TcCLB.504153.190	Q4E2R4	3.34753	0.0592197	Uncharacterized protein
TcCLB.509979.90	Q4E2E0	3.10874	0.0831914	60S ribosomal protein L35, putative
TcCLB.510655.40	Q4DFY6	2.89305	0.0933629	Uncharacterized protein
TcCLB.509915.60	Q4DKH6	2.59014	0.123769	Retrotransposon hot spot (RHS) protein, putative
TcCLB.508973.50	Q4DBF7	2.5515	0.0820017	ATP-dependent DEAD/H RNA helicase, putative
TcCLB.510667.120	Q4DFH6	2.50017	0.0779498	Galactokinase, putative
TcCLB.509895.10	Q4DCY3	2.49828	0.0788096	Uncharacterized protein
TcCLB.507667.20	Q4CPJ2	2.44678	0.217743	Uncharacterized protein
TcCLB.507769.30	Q4CNZ3	2.39043	0.106595	Uncharacterized protein
TcCLB.510105.170	Q4DZT8	2.34256	0.129401	Acetyltransferase component of pyruvate dehydrogenase complex
TcCLB.511043.30	Q4CXG2	2.32501	0.116518	DnaJ chaperone protein, putative
TcCLB.510943.50	Q4DRT8	2.26642	0.0893098	Delta-1-pyrroline-5-carboxylate dehydrogenase, putative
TcCLB.510339.50	Q4DA73	2.22491	0.0824386	Spermidine synthase, putative
TcCLB.511037.20	Q4CVQ1	2.22266	0.112964	Uncharacterized protein
TcCLB.511237.110	Q4D7C3	2.18318	0.197408	Peptidyl-prolyl cis-trans isomerase
TcCLB.508707.310	Q4E246	2.16644	0.152911	Uncharacterized protein
TcCLB.509569.40	Q4DKT4	2.15862	0.062488	Uncharacterized protein
TcCLB.510729.70	Q4DWX8	2.12014	0.0635157	Proteasome subunit alpha type
TcCLB.511545.70	Q4DMS4	2.1092	0.0939265	Uncharacterized protein
TcCLB.509941.100	Q4DKB3	2.09582	0.126527	2,4-dienoyl-coa reductase FADH1, putative
TcCLB.506885.410	Q4E4F9	2.0952	0.0537452	Uncharacterized protein
TcCLB.510593.49	Q4CW88	2.08785	0.125866	Kinetoplast DNA-associated protein, putative
TcCLB.510149.140	Q4DHQ1	2.01038	0.182387	RNA-binding protein, putative
TcCLB.511733.10	Q4D6R4	1.98934	0.102597	Aldehyde dehydrogenase, putative (Fragment)
TcCLB.506725.20	Q4D965	1.97762	0.102187	Uncharacterized protein
TcCLB.510121.20	Q4DQ27	1.97053	0.168301	Phosphotransferase
TcCLB.504741.240	Q4DTS0	1.96982	0.0723254	Uncharacterized protein
TcCLB.506195.290	Q4DXJ7	1.95164	0.119644	Uncharacterized protein
TcCLB.506413.70	Q4CXV2	1.94887	0.126258	Uncharacterized protein
TcCLB.509153.90	Q4DLS1	1.92716	0.0503652	Bifunctional dihydrofolate reductase-thymidylate synthase
TcCLB.508415.40	Q4D7Y8	1.91185	0.190765	ADP-ribosylation factor 1, putative
TcCLB.508637.150	Q4DLI2	1.91062	0.110096	Ribonuclease L inhibitor, putative
TcCLB.510087.80	Q4DB00	1.89251	0.115424	Uncharacterized protein
TcCLB.507993.380	Q4E1U4	1.86144	0.160398	Uncharacterized protein
TcCLB.511439.40	Q4DAP5	1.84371	0.123583	Uncharacterized protein
TcCLB.509317.60	Q4D488	1.83482	0.107471	RNA-binding protein, putative
TcCLB.508911.20	Q4D888	1.82192	0.118207	Uncharacterized protein
TcCLB.510299.20	Q4CZK6	1.80825	0.0809368	Uncharacterized protein
TcCLB.503689.4	Q4CV38	1.80529	0.0930083	Rab1 small GTP-binding protein, putative
TcCLB.507657.10	Q4CPW6	1.80125	0.132178	Glutamamyl carboxypeptidase, putative
TcCLB.511497.19	Q4CKT7	1.79999	0.147853	Amastin, putative (Fragment)
TcCLB.510121.160	Q4DQ13	1.78827	0.129146	DNA topoisomerase
TcCLB.511807.284	Q4E1B6	1.76887	0.16367	Carnitine O-palmitoyltransferase II, putative
TcCLB.509395.100	Q4DJQ7	1.76517	0.170028	Cytochrome b-domain protein, putative
TcCLB.506945.320	Q4DX68	1.75672	0.116218	Uncharacterized protein
TcCLB.503715.30	Q4CZR0	1.74037	0.0765913	Small GTP-binding protein Rab1, putative
TcCLB.511575.130	Q4DG60	1.66483	0.0681065	Folate/pteridine transporter, putative
TcCLB.510519.30	Q4DEB3	1.62897	0.065436	Mitochondrial structure specific endonuclease I (SSE-1), putative
TcCLB.503395.40	Q4CSL2	-1.63403	0.0674703	60S ribosomal protein L18, putative
TcCLB.506337.210	Q4DKX0	-1.66599	0.0765736	Signal recognition particle receptor like protein, putative
TcCLB.508955.20	Q4CM92	-1.72018	0.101858	Uncharacterized protein
TcCLB.509239.10	Q4CKQ6	-1.74421	0.11732	Fatty acid desaturase, putative
TcCLB.508205.20	Q4CUA4	-1.7499	0.0995161	Nucleolar RNA helicase II, putative
TcCLB.511909.50	Q4D4X0	-1.75525	0.129325	Uncharacterized protein
TcCLB.506789.240	Q4DZW5	-1.75694	0.0894455	Uncharacterized protein
TcCLB.509787.10	Q4CUW8	-1.77103	0.100635	Retrotransposon hot spot (RHS) protein, putative
TcCLB.506227.90	Q4DSW1	-1.78706	0.0878035	SURF1-like protein
TcCLB.504109.180	Q4DR29	-1.80675	0.223199	Uncharacterized protein
TcCLB.510729.160	Q4DWW8	-1.80858	0.0838485	Uncharacterized protein
TcCLB.507053.180	Q4DTI7	-1.80952	0.130809	Uncharacterized protein
TcCLB.503893.30	Q4DL45	-1.80959	0.182798	Uncharacterized protein
TcCLB.506421.10	Q4CLI9	-1.84007	0.166332	Retrotransposon hot spot (RHS) protein, putative (Fragment)
TcCLB.510163.20	Q4CXW2	-1.87282	0.124239	Elongation factor 1-gamma (EF-1-gamma), putative
TcCLB.506315.70	Q4D798	-1.89484	0.0612754	Uncharacterized protein
TcCLB.506503.100	Q4DRD5	-1.89485	0.11635	U3 snoRNA-associated protein UTP11, putative
TcCLB.506883.30	Q4D570	-1.91609	0.219688	GTP-binding protein, putative
TcCLB.507923.10	Q4CU39	-1.92118	0.2407	L-threonine 3-dehydrogenase, putative
TcCLB.510105.210	Q4DZT3	-1.94673	0.0718457	Mitochondrial ATP-dependent zinc metallopeptidase, putative
TcCLB.511667.20	Q4DNM2	-1.97338	0.101878	Retrotransposon hot spot (RHS) protein, putative
TcCLB.507611.280	Q4E3G4	-1.97876	0.126735	Cytochrome c oxidase subunit IX, putative
TcCLB.508797.29	Q4CPG5	-1.98464	0.0876866	Uncharacterized protein (Fragment)
TcCLB.506177.10	Q4DHU1	-2.00001	0.144098	Uncharacterized protein
TcCLB.509165.40	Q4CVQ4	-2.00373	0.067092	60S acidic ribosomal protein P2 beta (H6.4), putative
TcCLB.506529.410	Q4E5P1	-2.00413	0.0542059	Uncharacterized protein
TcCLB.509831.36	Q4D0R4	-2.01423	0.093247	Mitochondrial RNA binding protein 1, putative
TcCLB.510579.70	Q4D9L7	-2.02372	0.137231	Nascent polypeptide associated complex subunit, putative
TcCLB.507511.40	Q4D3H6	-2.02424	0.10426	Uncharacterized protein
TcCLB.511211.120	Q4DTN2	-2.06207	0.174814	Activated protein kinase C receptor, putative
TcCLB.510357.130	Q4DBV1	-2.06252	0.174521	Uncharacterized protein
TcCLB.507723.130	Q4DQJ3	-2.12724	0.0507657	Eukaryotic translation initiation factor 3 subunit 8, putative
TcCLB.508839.80	Q4D5K8	-2.13046	0.0865601	Uncharacterized protein
TcCLB.506775.80	Q4DRH6	-2.16881	0.119368	14-3-3 protein, putative
TcCLB.506753.240	Q4DLW6	-2.17668	0.131359	Uncharacterized protein
TcCLB.510879.140	Q4DJW9	-2.19456	0.0676311	Uncharacterized protein
TcCLB.510735.70	Q4D3W8	-2.31897	0.105286	Uncharacterized protein
TcCLB.506247.50	Q4E151	-2.34421	0.124147	Chaperonin, putative
TcCLB.506947.10	Q4DA30	-2.50207	0.0965054	Uncharacterized protein
TcCLB.511167.90	Q4DHC9	-2.51033	0.0904784	14-3-3 protein, putative
TcCLB.506739.90	Q4DRR3	-2.5342	0.128994	ATP-dependent RNA helicase, putative
TcCLB.505985.9	Q4CPQ6	-2.57785	0.0611824	Calpain cysteine peptidase, putative (Fragment)
TcCLB.506937.10	Q4CTR7	-2.5801	0.0828892	Malate dehydrogenase
TcCLB.507681.210	Q4DW33	-2.93209	0.0586686	Uncharacterized protein
TcCLB.506713.24	Q4D2R3	-2.93424	0.0610739	Uncharacterized protein
TcCLB.510609.30	Q4DJM9	-3.04109	0.095071	GTPase, putative
TcCLB.508479.230	Q4E2J8	-4.0939	0.0822076	Peroxin-2, putative
#These identifications did not meet the fold and p-value criteria. (should be disconsidered)
TcCLB.508707.80	Q4E269	1.81152	0.256645	RNA-binding protein, putative
TcCLB.506625.70	Q4DUD5	1.7128	0.15393	RNA-binding protein, putative
TcCLB.506275.20	Q4D729	1.68975	0.252976	Hslvu complex proteolytic subunit-like, putative
TcCLB.510507.20	Q4D7M6	1.67724	0.144952	3-ketoacyl-CoA thiolase, putative
TcCLB.510635.40	Q4D231	1.66181	0.15439	Uncharacterized protein
TcCLB.506577.150	Q4DR79	1.65892	0.156112	Uncharacterized protein
TcCLB.508879.60	Q4DXF0	1.65266	0.218152	Uncharacterized protein
TcCLB.508533.10	Q4D4Y8	1.65116	0.118605	Uncharacterized protein (Fragment)
TcCLB.508777.110	Q4DS62	1.63395	0.234979	Uncharacterized protein
TcCLB.507949.250	Q4DS02	1.62794	0.210732	Uncharacterized protein
TcCLB.511287.150	Q4DIZ5	1.62483	0.254911	Fibrillarin, putative
TcCLB.511261.160	Q4DL16	1.60733	0.0796253	Pyruvate dehydrogenase E1 component alpha subunit, putative (Fragment)
TcCLB.506789.280	Q4DZW1	1.60101	0.268286	Purine nucleoside phosphorylase
TcCLB.504069.56	Q4DAV9	1.60039	0.13586	60S ribosomal protein L37a, putative
TcCLB.508989.9	Q4DAD9	1.59686	0.0939305	Nucleoside phosphorylase, putative (Fragment)
TcCLB.511295.50	Q4D7R8	1.59067	0.0770145	Uncharacterized protein
TcCLB.510215.10	Q4CMU8	1.58624	0.0751567	NADH-dependent fumarate reductase, putative
TcCLB.511277.110	Q4E5I4	1.58073	0.0718859	Citrate synthase
TcCLB.510993.10	Q4CNF9	1.57972	0.217798	(H+)-ATPase G subunit, putative
TcCLB.505193.100	Q4DDB3	1.57972	0.0916284	Uncharacterized protein
TcCLB.504153.20	Q4E2S6	1.57213	0.143411	Phosphoglycerate kinase
TcCLB.506821.90	Q4DNN6	1.56872	0.285123	Uncharacterized protein
TcCLB.509141.40	Q4CSK6	1.56649	0.160604	Uncharacterized protein
TcCLB.510659.210	Q4DVP6	1.56379	0.253835	Chaperone DnaJ protein, putative
TcCLB.410923.20	Q4CS11	1.55794	0.280192	Retrotransposon hot spot (RHS) protein, putative
TcCLB.506227.230	Q4DSU6	1.55654	0.155439	N-acetyltransferase complex ARD1 subunit, putative
TcCLB.507009.40	Q4DC09	1.55242	0.265087	Galactokinase, putative
TcCLB.506411.30	Q4CVA1	1.54618	0.248068	Proline oxidase, putative
TcCLB.507483.30	Q4D139	1.54021	0.121289	Calmodulin, putative
TcCLB.510317.7	Q4CY57	1.53986	0.148979	Uncharacterized protein (Fragment)
TcCLB.507907.50	Q4D622	1.53884	0.184344	Uncharacterized protein
TcCLB.506235.20	Q4CSK3	1.53685	0.168514	Uncharacterized protein
TcCLB.509599.150	Q4DP62	1.53104	0.0713164	Serine/threonine protein kinase, putative
TcCLB.507993.30	Q4E1X6	1.52707	0.172572	Uncharacterized protein
TcCLB.508067.10	Q4CNG6	1.52551	0.298389	Uncharacterized protein
TcCLB.508693.20	Q4DTW1	1.52491	0.255393	DNA topoisomerase IB, large subunit, putative
TcCLB.506945.20	Q4DX96	1.5214	0.0787145	Phosphoglycerate kinase
TcCLB.506885.14	Q4DXW6	1.52131	0.10944	Ribosomal protein L37
TcCLB.511367.138	Q4DYH7	1.51575	0.154791	Chaperone DnaJ protein, putative
TcCLB.511865.80	Q4D3Z6	1.51393	0.058026	Uncharacterized protein
TcCLB.508479.150	Q4E2L0	1.50438	0.268043	Serine/threonine protein kinase, putative
TcCLB.503681.9	Q4CR94	1.50264	0.221482	Uncharacterized protein (Fragment)
TcCLB.509683.100	Q4DLT4	1.50082	0.249925	Uncharacterized protein
TcCLB.511577.80	Q4DM30	1.49832	0.129844	Uncharacterized protein
TcCLB.510091.110	Q4DB88	1.48392	0.0446429	Uncharacterized protein
TcCLB.504121.30	Q4CQW2	1.48382	0.0350829	60S ribosomal protein L4, putative
TcCLB.509793.50	Q4CY60	1.47608	0.041794	Uncharacterized protein
TcCLB.507501.10	Q4CX26	1.46606	0.226889	Retrotransposon hot spot (RHS) protein, putative
TcCLB.508959.4	Q4CV48	1.4627	0.0444229	Cytochrome c, putative
TcCLB.507715.40	Q4DEC2	1.46048	0.260439	GTP-binding elongation factor Tu family, putative
TcCLB.506959.30	Q4DIE1	1.46039	0.0312442	ATP-dependent DEAD/H RNA helicase, putative
TcCLB.509695.200	Q4DTP9	1.45609	0.28048	T-complex protein 1 subunit delta
TcCLB.509627.40	Q4CY99	1.45579	0.0712766	Uncharacterized protein
TcCLB.511715.100	Q4D599	1.45533	0.319241	Pumilio/PUF RNA binding protein 7, putative
TcCLB.508815.60	Q4DMJ8	1.45389	0.257746	Uncharacterized protein
TcCLB.508169.60	Q4D5W6	1.45375	0.247516	Dolichyl-phosphate beta-D-mannosyltransferase, putative
TcCLB.510105.230	Q4DZT1	1.45374	0.278615	Glyceraldehyde-3-phosphate dehydrogenase
TcCLB.506443.150	Q4DME9	1.44783	0.101612	Retrotransposon hot spot (RHS) protein, putative
TcCLB.503955.70	Q4DH88	1.44638	0.0388581	Translation initiation factor, putative
TcCLB.511025.50	Q4DD39	1.44286	0.140623	Glucosamine-6-phosphate isomerase
TcCLB.508707.200	Q4E256	1.44181	0.0885274	Nucleoside diphosphate kinase
TcCLB.509749.30	Q4CPE0	1.43698	0.19366	Uncharacterized protein
TcCLB.511731.60	Q4D7F9	1.43287	0.120474	Glutamyl-tRNA synthetase, putative
TcCLB.509777.130	Q4DIM2	1.43016	0.204803	Uncharacterized protein
TcCLB.506587.40	Q4D8X3	1.42891	0.266881	ATP-dependent DEAD/H RNA helicase, putative
TcCLB.506975.40	Q4DGW6	1.42462	0.279483	Aminoacylase, putative
TcCLB.506567.100	Q4DBT8	1.42427	0.193799	Uncharacterized protein
TcCLB.508727.50	Q4CWH7	1.42088	0.287693	Uncharacterized protein
TcCLB.509683.20	Q4DLU3	1.41847	0.180713	Uncharacterized protein
TcCLB.508989.30	Q4DAD7	1.41551	0.0886362	RNA-binding protein, putative
TcCLB.506679.180	Q4E085	1.41294	0.137409	Uncharacterized protein
TcCLB.509067.70	Q4D112	1.40481	0.118261	Pyrroline-5-carboxylate synthetase-like protein, putative (Fragment)
TcCLB.506577.120	Q4DR82	1.40168	0.040279	Sterol C-24 reductase, putative
TcCLB.506241.170	Q4DU31	1.40164	0.0441789	40S ribosomal protein S6
TcCLB.508111.30	Q4D5C2	1.39929	0.0298512	Glutamate dehydrogenase
TcCLB.506297.30	Q4E0R5	1.39897	0.0765153	Uncharacterized protein
TcCLB.504013.100	Q4D6N9	1.39889	0.14444	Ribosomal protein S19, putative
TcCLB.508535.20	Q4CYX0	1.39806	0.0171071	Uncharacterized protein
TcCLB.511751.160	Q4DVU8	1.39226	0.262932	Uncharacterized protein
TcCLB.508999.220	Q4E0D6	1.38734	0.048406	Calpain cysteine peptidase, putative
TcCLB.508397.40	Q4D3E3	1.38686	0.0954396	Uncharacterized protein
TcCLB.506679.100	Q4E093	1.38632	0.0331276	40S ribosomal protein S18, putative
TcCLB.509379.20	Q4CQ17	1.3844	0.234717	Uncharacterized protein
TcCLB.511287.49	Q4DJ07	1.38319	0.0863832	Prostaglandin F synthase
TcCLB.511727.270	Q4DY32	1.38168	0.0240004	RNA-binding protein, putative
TcCLB.507709.50	Q4DIV9	1.37645	0.0551125	60S ribosomal protein L6, putative
TcCLB.508823.70	Q4D6I3	1.37585	0.052541	Uncharacterized protein
TcCLB.506195.80	Q4DXL7	1.37541	0.263871	Adenylate kinase, putative
TcCLB.509791.120	Q4DNI4	1.36829	0.0685211	Kinetoplast DNA-associated protein, putative
TcCLB.506887.20	Q4D345	1.36574	0.237351	Uncharacterized protein
TcCLB.508461.140	Q4E4V0	1.36513	0.0153847	Polyadenylate-binding protein
TcCLB.506829.110	Q4DD91	1.3614	0.116322	Fatty acyl CoA synthetase 2, putative
TcCLB.506559.350	Q4E595	1.36131	0.0820855	Asparaginyl-tRNA synthetase, putative
TcCLB.507063.90	Q4E024	1.36023	0.143099	Mitochondrial DNA polymerase beta, putative
TcCLB.506529.430	Q4E5N8	1.35848	0.0250639	Alanine aminotransferase, putative
TcCLB.509003.30	Q4CW64	1.35621	0.0396476	Calpain-like cysteine peptidase, putative
TcCLB.511277.490	Q4E5E4	1.35293	0.359658	Uncharacterized protein
TcCLB.510131.30	Q4D5I3	1.34348	0.0942994	Uncharacterized protein
TcCLB.506559.470	Q4E581	1.34334	0.158497	Ribosomal protein L35A, putative
TcCLB.507951.270	Q4DUR6	1.34144	0.131229	Uncharacterized protein
TcCLB.511367.60	Q4DYI6	1.33935	0.298951	LA RNA binding protein, putative
TcCLB.506559.559	Q4E572	1.33868	0.196429	Antigenic protein, putative (Fragment)
TcCLB.510679.40	Q4CYC6	1.33499	0.158756	Uncharacterized protein
TcCLB.511277.70	Q4E5I8	1.3321	0.12124	Elongation factor TU, putative
TcCLB.508827.40	Q4DK44	1.33044	0.0285706	Acyl-CoA dehydrogenase, putative
TcCLB.507765.130	Q4DFT9	1.32624	0.311235	Uncharacterized protein
TcCLB.503769.40	Q4CXC3	1.32423	0.159765	Cytochrome c oxidase VII, putative
TcCLB.511151.90	Q4DC80	1.32265	0.115033	Glycerol-3-phosphate dehydrogenase
TcCLB.508277.160	Q4E0Y0	1.31564	0.321649	Glutaminyl-tRNA synthetase, putative
TcCLB.508661.20	Q4CX04	1.31248	0.047826	Ubiquitin/ribosomal protein S27a, putative
TcCLB.506945.290	Q4DJZ6	1.31116	0.113752	Ribosomal protein L15
TcCLB.510055.150	Q4DMM7	1.31097	0.341302	Uncharacterized protein
TcCLB.479379.9	Q4CKF1	1.31018	0.258832	Dynein heavy chain, putative (Fragment)
TcCLB.510575.200	Q4DLU9	1.30931	0.148854	Chaperone DnaJ protein, putative
TcCLB.508175.329	Q4E2W4	1.30851	0.0924951	60S ribosomal protein L19, putative
TcCLB.503899.20	Q4DEK4	1.30728	0.0316245	40S ribosomal protein S16, putative
TcCLB.511367.220	Q4DYH1	1.30604	0.128009	Uncharacterized protein
TcCLB.504003.50	Q4D1L6	1.3049	0.202685	Uncharacterized protein
TcCLB.510761.14	Q4DG45	1.30483	0.168591	60S ribosomal protein L26, putative
TcCLB.505843.24	Q4CVH2	1.30439	0.249966	Succinate dehydrogenase, putative
TcCLB.507053.10	Q4DTK4	1.30179	0.133745	50S ribosomal protein L7Ae, putative
TcCLB.508299.20	Q4D9H2	1.29914	0.285343	Uncharacterized protein
TcCLB.507259.10	Q4CM56	1.29835	0.0796494	Tryparedoxin peroxidase, putative
TcCLB.509199.24	Q4CQE2	1.2972	0.288952	Ribose 5-phosphate isomerase
TcCLB.508319.40	Q4D0U9	1.29569	0.311264	RNA helicase, putative
TcCLB.509105.130	Q4DKI0	1.29565	0.337585	ATP-binding cassette protein, putative
TcCLB.508321.21	Q4CYH8	1.29521	0.0800198	Histone H2A
TcCLB.508175.309	Q4E2W6	1.29467	0.0936243	60S ribosomal protein L19, putative
TcCLB.506585.70	Q4D617	1.29424	0.267318	p450 reductase, putative
TcCLB.511285.30	Q4DHA3	1.2938	0.338443	Uncharacterized protein
TcCLB.509001.40	Q4CV42	1.29234	0.17606	Calpain-like cysteine peptidase, putative
TcCLB.510739.19	Q4CM88	1.29225	0.338015	Cystathione gamma lyase, putative (Fragment)
TcCLB.508299.60	Q4D5K2	1.28914	0.105395	60S ribosomal protein L2, putative
TcCLB.509317.80	Q4D487	1.28592	0.299342	Uncharacterized protein
TcCLB.487507.10	Q4CVR5	1.28317	0.0798385	Tryparedoxin peroxidase, putative
TcCLB.509455.114	Q4DIB5	1.2831	0.0717875	Uncharacterized protein
TcCLB.509207.40	Q4DH64	1.2811	0.176641	Uncharacterized protein
TcCLB.508851.59	Q4DJC9	1.28034	0.301747	ATP synthase, putative
TcCLB.508555.60	Q4D609	1.27814	0.119786	Cytoskeleton-associated protein CAP5.5, putative
pfk	Q4E657	1.27637	0.152468	ATP-dependent 6-phosphofructokinase
TcCLB.509103.30	Q4CV56	1.27534	0.274643	Uncharacterized protein
TcCLB.511025.70	Q4DD37	1.27041	0.309916	Chaperonin alpha subunit, putative
TcCLB.503991.30	Q4CQY2	1.26807	0.224053	Uncharacterized protein
TcCLB.506301.11	Q4D0L7	1.2678	0.126655	Heat shock protein, putative (Fragment)
TcCLB.511245.150	Q4DUK5	1.2673	0.324144	Elongation of fatty acids protein
TcCLB.508675.29	Q4D066	1.26699	0.245179	Calpain-like cysteine peptidase, putative
TcCLB.509683.117	Q4D5P4	1.26446	0.028287	40S ribosomal protein S4
TcCLB.511049.40	Q4CTR0	1.26397	0.195811	Leucyl-tRNA synthetase, putative
TcCLB.506503.150	Q4DRD1	1.26382	0.298426	Histone H3 variant, putative
TcCLB.508711.40	Q4CZK9	1.26251	0.337085	Uncharacterized protein
TcCLB.509213.40	Q4DGY4	1.26153	0.144063	Uncharacterized protein
TcCLB.511333.4	Q4CP00	1.26116	0.14248	Cytoskeleton-associated protein CAP5.5, putative (Fragment)
TcCLB.511469.20	Q4DCJ1	1.25851	0.19574	Uncharacterized protein
TcCLB.504433.10	Q4D2I4	1.25823	0.382112	ADP-ribosylation factor 3, putative
TcCLB.511285.120	Q4DH96	1.25785	0.0965788	ATP-dependent RNA helicase, putative
TcCLB.510689.50	Q4D577	1.25424	0.302533	Cell differentiation protein, putative
TcCLB.507681.20	Q4DW49	1.24943	0.296051	Succinate-CoA ligase subunit beta
TcCLB.506327.30	Q4DBG8	1.24746	0.361376	Uncharacterized protein
TcCLB.506963.20	Q4DB26	1.24737	0.185693	60S ribosomal protein L34, putative
TcCLB.503575.34	Q4D205	1.24308	0.155085	Ribosomal protein L38, putative
TcCLB.509793.40	Q4CY61	1.23928	0.148769	Kinetoplast DNA-associated protein, putative
TcCLB.506213.80	Q4DC23	1.22566	0.224414	60S ribosomal protein L17, putative
TcCLB.508319.70	Q4D0U7	1.22359	0.109492	40S ribosomal protein S11, putative
TcCLB.508601.100	Q4DBQ1	1.22351	0.174447	Uncharacterized protein
TcCLB.509381.20	Q4CP93	1.22124	0.0580339	40S ribosomal protein S15a, putative
TcCLB.511527.70	Q4D5J9	1.2206	0.389743	Myosin heavy chain, putative
TcCLB.510943.80	Q4DRT5	1.22003	0.310257	ABC transporter, putative
TcCLB.508299.80	Q4D9G6	1.21548	0.15051	Threonyl-tRNA synthetase, putative
TcCLB.503617.40	Q4CXB4	1.2129	0.285625	ATPase alpha subunit, putative (Fragment)
TcCLB.508693.50	Q4DTV8	1.21191	0.162471	Uncharacterized protein
TcCLB.507019.30	Q4DA55	1.21111	0.158247	Ribosome biogenesis regulatory protein (RRS1), putative
TcCLB.507027.50	Q4CZX9	1.21037	0.335166	Uncharacterized protein
TcCLB.510395.10	Q4CNR6	1.20915	0.112562	ATP synthase, alpha chain, mitochondrial, putative (Fragment)
TcCLB.509203.70	Q4D8L4	1.20903	0.286009	DNA topoisomerase 2
TcCLB.506375.90	Q4DE75	1.20771	0.300268	Uncharacterized protein
TcCLB.504505.20	Q4CQM8	1.20689	0.326788	Retrotransposon hot spot (RHS) protein, putative
TcCLB.504163.30	Q4D4S1	1.20456	0.279954	40S ribosomal protein S9, putative
TcCLB.509127.50	Q4D8C1	1.20374	0.133204	Mitochondrial carrier protein, putative
TcCLB.510755.89	Q4D7Y4	1.20036	0.208925	Kinetoplastid membrane protein KMP-11, putative
TcCLB.507049.50	Q4DPX9	1.19691	0.36633	ABC transporter, putative
TcCLB.510241.50	Q4DD50	1.19606	0.0869634	60S ribosomal protein L10, putative
TcCLB.511465.10	Q4CPR5	1.19497	0.314125	Proteasome activator protein PA26, putative
TcCLB.507541.40	Q4CSN9	1.18843	0.384209	Casein kinase, putative
TcCLB.506649.20	Q4DE37	1.18813	0.251985	Plasma membrane ATPase
TcCLB.509683.30	Q4DLU1	1.18674	0.400701	Uncharacterized protein
TcCLB.409117.20	Q4D6I5	1.18673	0.0723594	40S ribosomal protein S14, putative
TcCLB.510661.250	Q4DUG8	1.18487	0.406171	Cystathione gamma lyase, putative
TcCLB.509065.9	Q4DHF8	1.18457	0.248041	Aldehyde dehydrogenase, putative (Fragment)
TcCLB.507767.10	Q4CLP3	1.18385	0.341272	Succinyl-CoA ligase [GDP-forming] beta-chain, putative (Fragment)
TcCLB.503449.14	Q4CRX4	1.18283	0.238673	Uncharacterized protein
TcCLB.511733.100	Q4D6Q5	1.17897	0.312335	Uncharacterized protein
TcCLB.510421.210	Q4DXR1	1.17862	0.392705	Uncharacterized protein
TcCLB.510777.20	Q4CNC1	1.17646	0.192775	Aspartyl-tRNA synthetase, putative
TcCLB.510609.34	Q4DJM8	1.17235	0.374397	Uncharacterized protein
TcCLB.506983.39	Q4CYU3	1.17132	0.302456	Calpain-like cysteine peptidase, putative
TcCLB.509901.170	Q4DDS8	1.17074	0.369791	DNA-(apurinic or apyrimidinic site) lyase (Fragment)
TcCLB.508241.10	Q4DG35	1.1706	0.321332	Glycerol-3-phosphate dehydrogenase, putative (Fragment)
TcCLB.505763.19	Q4CQ52	1.17016	0.23402	Plasma membrane ATPase (Fragment)
TcCLB.507625.170	Q4DPD9	1.16956	0.403194	Uncharacterized protein
TcCLB.509331.74	Q4DQY2	1.16921	0.292967	Uncharacterized protein
TcCLB.504057.90	Q4DSE6	1.16739	0.282858	Uncharacterized protein
TcCLB.506563.40	Q4DQP2	1.16456	0.242854	Tubulin beta chain
TcCLB.506297.190	Q4E0Q0	1.16346	0.0275626	Pyruvate, phosphate dikinase
TcCLB.506041.20	Q4CUZ5	1.16342	0.406227	Uncharacterized protein
TcCLB.507929.20	Q4CPP0	1.16252	0.415493	Co-chaperone GrpE, putative
TcCLB.504069.80	Q4DAV6	1.16123	0.270205	ATP synthase F1 subunit gamma protein, putative
TcCLB.507539.10	Q4CUS7	1.16027	0.380144	Uncharacterized protein
TcCLB.504001.20	Q4CW22	1.15983	0.354776	Uncharacterized protein
TcCLB.509237.130	Q4DJS7	1.15807	0.261817	Cytoskeleton-associated protein CAP5.5, putative
TcCLB.507063.100	Q4E023	1.15778	0.390388	Mitochondrial DNA polymerase beta-PAK, putative
TcCLB.508881.50	Q4DMI1	1.15754	0.424583	Uncharacterized protein
TcCLB.508741.300	Q4E342	1.15687	0.220216	Proteasome regulatory non-ATPase subunit 6, putative
TcCLB.507029.30	Q4CVR9	1.15455	0.227513	Heat shock 70 kDa protein, mitochondrial, putative
TcCLB.507081.130	Q4DGT6	1.15238	0.353202	Uncharacterized protein
TcCLB.504427.110	Q4DYN2	1.15162	0.312269	Acetyl-coenzyme A synthetase
TcCLB.510187.20	Q4E4E9	1.15075	0.237705	Tyrosine aminotransferase, putative
TcCLB.506831.40	Q4D4C9	1.14904	0.395033	3-hydroxy-3-methylglutaryl coenzyme A reductase
TcCLB.508409.210	Q4DWS5	1.14814	0.380302	Hsc70-interacting protein, putative
TcCLB.509429.4	Q4E0M5	1.14664	0.359455	Retrotransposon hot spot (RHS) protein, putative (Fragment)
TcCLB.510663.70	Q4D0X5	1.14632	0.145418	6-phosphogluconate dehydrogenase, decarboxylating
TcCLB.503811.60	Q4D248	1.14618	0.399776	Elongation factor Ts 1, mitochondrial
TcCLB.511867.209	Q4DKP5	1.14514	0.401804	Dynein heavy chain, putative (Fragment)
TcCLB.505977.26	Q4CSS8	1.14422	0.404153	60S acidic ribosomal protein P2, putative
TcCLB.509219.20	Q4CXQ1	1.14352	0.361557	Retrotransposon hot spot (RHS) protein, putative
TcCLB.509033.80	Q4D9F7	1.14331	0.352517	Uncharacterized protein
TcCLB.508323.100	Q4DFL2	1.13875	0.335734	I/6 autoantigen, putative
TcCLB.508269.40	Q4D6B1	1.13871	0.228453	Uncharacterized protein
TcCLB.510657.120	Q4DS27	1.13826	0.369796	Uncharacterized protein
TcCLB.506127.9	Q4DP98	1.13635	0.395235	Phosphoglycerate kinase, putative (Fragment)
TcCLB.508589.30	Q4D3Z2	1.13626	0.380734	Retrotransposon hot spot (RHS) protein, putative
TcCLB.508501.250	Q4DUU1	1.13536	0.382323	Uncharacterized protein
TcCLB.511181.20	Q4DPR6	1.13333	0.392704	Uncharacterized protein
TcCLB.507019.60	Q4DA51	1.1315	0.399897	Uncharacterized protein
TcCLB.508153.400	Q4E650	1.13109	0.268081	Serine/threonine protein kinase, putative
TcCLB.504199.20	Q4CVJ1	1.13033	0.429037	Uncharacterized protein
TcCLB.510227.29	Q4CNS3	1.12527	0.396684	Thioredoxin, putative (Fragment)
TcCLB.509917.19	Q4CRM5	1.12501	0.32835	Retrotransposon hot spot (RHS) protein, putative (Fragment)
TcCLB.511529.68	Q4DMY8	1.12471	0.404548	Cyclin-dependent kinases regulatory subunit
TcCLB.506945.190	Q4DX81	1.12413	0.30174	Cytochrome p450-like protein, putative
TcCLB.510889.221	Q4E2M9	1.12266	0.311369	Glucose-6-phosphate isomerase
TcCLB.508153.760	Q4E617	1.1216	0.353362	Uncharacterized protein
TcCLB.508441.10	Q4DB82	1.12085	0.202869	NUP-1 protein, putative (Fragment)
TcCLB.508785.10	Q4CNH5	1.12024	0.391088	Uncharacterized protein
TcCLB.506773.90	Q4DQF4	1.11951	0.417296	Amino acid permease/transporter, putative
TcCLB.507585.10	Q4CPV4	1.11812	0.440802	Amino acid transporter, putative
TcCLB.508863.10	Q4CPC6	1.11772	0.405926	Uncharacterized protein
TcCLB.506407.100	Q4DCV3	1.11145	0.404869	Uncharacterized protein
TcCLB.509721.60	Q4D1I2	1.11128	0.32288	Poly [ADP-ribose] polymerase
TcCLB.505763.10	Q4CQ53	1.11099	0.215909	Proton motive ATPase 1, putative (Fragment)
TcCLB.506247.220	Q4E133	1.10988	0.376037	Histidine ammonia-lyase
TcCLB.508039.30	Q4CYR3	1.1096	0.36381	Retrotransposon hot spot (RHS) protein, putative
TcCLB.506657.40	Q4D426	1.10598	0.345701	ADP/ATP translocase, putative
TcCLB.503453.30	Q4D8K4	1.10388	0.312377	60S ribosomal protein L30, putative
TcCLB.507765.149	Q4DFT7	1.10278	0.317939	Uncharacterized protein (Fragment)
TcCLB.509695.170	Q4CVX9	1.10275	0.0109896	60S ribosomal protein L9, putative
TcCLB.510901.100	Q4DXC5	1.10073	0.397908	DNA topoisomerase
TcCLB.511821.179	Q4DQS9	1.10011	0.447921	Uncharacterized protein (Fragment)
TcCLB.510289.20	Q4D5N6	1.09915	0.40995	Uncharacterized protein
TcCLB.511903.40	Q4DU88	1.09737	0.417074	Uncharacterized protein
TcCLB.504153.310	Q4E2Q2	1.09711	0.2473	Heat shock protein, putative
TcCLB.510755.129	Q4D7Y0	1.09669	0.346947	60S ribosomal protein L12, putative
TcCLB.509611.180	Q4DK88	1.09651	0.391878	Peptide methionine sulfoxide reductase, putative
TcCLB.509747.20	Q4DD81	1.09582	0.349731	60S ribosomal protein L22, putative
TcCLB.508461.490	Q4E4R0	1.09421	0.354774	60S ribosomal protein L23, putative
TcCLB.508595.50	Q4CTX9	1.0925	0.340585	Cysteine peptidase, putative (Fragment)
TcCLB.510945.70	Q4D1Q4	1.09184	0.267969	Aspartate aminotransferase, mitochondrial, putative
TcCLB.511003.30	Q4DNU7	1.08896	0.356079	Uncharacterized protein
TcCLB.508153.1050	Q4E5Z1	1.08369	0.300451	Uncharacterized protein
TcCLB.508181.70	Q4DRA1	1.08357	0.445113	Uncharacterized protein
TcCLB.508919.140	Q4DL69	1.08247	0.2324	Uncharacterized protein
TcCLB.503719.20	Q4CQU0	1.07947	0.212375	40S ribosomal protein SA
TcCLB.508741.170	Q4E355	1.07776	0.369132	Uncharacterized protein
TcCLB.509937.210	Q4DSP3	1.07723	0.432847	Uncharacterized protein
TcCLB.504069.30	Q4D1H8	1.07705	0.266318	60S ribosomal protein L32, putative
TcCLB.510395.20	Q4CNR5	1.07644	0.384001	Uncharacterized protein
TcCLB.506321.290	Q4DYD9	1.07299	0.413922	Stress-induced protein sti1, putative
TcCLB.510947.50	Q4CU89	1.07189	0.428292	Peptidyl-prolyl cis-trans isomerase (Fragment)
TcCLB.509213.170	Q4DGX1	1.07166	0.448843	Transcription activator, putative (Fragment)
TcCLB.509695.210	Q4DTP7	1.07049	0.335534	Carboxypeptidase
TcCLB.510723.29	Q4CPC1	1.07005	0.328323	1-acyl-sn-glycerol-3-phosphate acyltransferase, putative (Fragment)
TcCLB.504003.60	Q4D1L5	1.06785	0.425807	T-complex protein 1 subunit gamma
TcCLB.509903.5	Q4CZV4	1.0675	0.407269	Retrotransposon hot spot (RHS) protein, putative (Fragment)
TcCLB.507241.30	Q4CWA5	1.06576	0.434166	Arginine kinase, putative
TcCLB.511019.74	Q4DI32	1.06471	0.43439	Retrotransposon hot spot (RHS) protein, putative
TcCLB.506297.150	Q4E0Q3	1.06465	0.307198	40S ribosomal protein S5, putative
TcCLB.504625.99	Q4D674	1.06225	0.443507	Protein tyrosine phosphatase, putative (Fragment)
TcCLB.506295.100	Q4DEQ6	1.06211	0.424376	Uncharacterized protein
TcCLB.511929.30	Q4D2I5	1.06192	0.420521	Retrotransposon hot spot (RHS) protein, putative
TcCLB.507941.150	Q4DEL1	1.06034	0.378478	Histone H4
TcCLB.506829.90	Q4DD93	1.05927	0.448573	Uncharacterized protein
TcCLB.509105.140	Q4DBM7	1.05893	0.405747	Heat shock protein 85, putative
TcCLB.509109.120	Q4DQM4	1.05831	0.413987	Protein tyrosine phosphatase, putative
TcCLB.510879.110	Q4DJX1	1.05704	0.367364	Ribosomal protein L3, putative
TcCLB.506025.14	Q4CXR4	1.05618	0.427185	Ribosomal protein S29, putative
TcCLB.511385.100	Q4DKG7	1.054	0.4645	Uncharacterized protein
TcCLB.510145.20	Q4CVE9	1.05139	0.44359	Cofilin/actin depolymerizing factor, putative
TcCLB.507831.70	Q4DI66	1.05024	0.395902	Pyruvate dehydrogenase E1 component subunit alpha
TcCLB.511903.120	Q4DU82	1.04847	0.447487	Transketolase
TcCLB.510101.30	Q4E3Q5	1.04682	0.376124	60S ribosomal protein L28, putative
TcCLB.508375.30	Q4D3W3	1.04165	0.469245	Aspartate carbamoyltransferase, putative
TcCLB.510663.19	Q4D0Y0	1.04144	0.386498	60S ribosomal subunit protein L31, putative
TcCLB.511903.110	Q4DU83	1.04138	0.352406	40S ribosomal protein S8
TcCLB.504057.97	Q4DSE5	1.03983	0.395918	Uncharacterized protein
TcCLB.511803.40	Q4D015	1.03968	0.42123	Uncharacterized protein
TcCLB.506135.9	Q4DAZ6	1.03894	0.471904	Heat shock 70 kDa protein, putative (Fragment)
TcCLB.503809.20	Q4DK17	1.03747	0.46716	Peroxisome assembly protein, putative
TcCLB.508267.20	Q4CUZ4	1.03677	0.426479	Uncharacterized protein
TcCLB.503611.20	Q4E078	1.03659	0.34223	Ribosomal protein L24, putative
TcCLB.511577.44	Q4DM34	1.03644	0.476121	Uncharacterized protein
TcCLB.510769.30	Q4DSU2	1.03617	0.47612	Uncharacterized protein
TcCLB.507657.20	Q4CPW5	1.03225	0.462359	Glutamamyl carboxypeptidase, putative
TcCLB.510519.80	Q4DEA8	1.03167	0.434089	Uncharacterized protein
TcCLB.430605.29	Q4CUL0	1.03095	0.389069	40S ribosomal protein S3, putative
TcCLB.459199.10	Q4CQ60	1.02979	0.45664	Retrotransposon hot spot (RHS) protein, putative
TcCLB.509717.20	Q4DMG9	1.02703	0.485024	Acetyltransferase component of pyruvate dehydrogenase complex
TcCLB.511017.50	Q4D418	1.02502	0.456173	Glycosomal membrane protein, putative
TcCLB.506195.110	Q4DXL5	1.02448	0.470681	Malate dehydrogenase
TcCLB.508739.60	Q4CMF1	1.02301	0.42803	Histone H4
TcCLB.503467.9	Q4CQU6	1.02259	0.484325	NADH-dependent fumarate reductase, putative (Fragment)
TcCLB.503939.20	Q4DLL1	1.02188	0.459464	Uncharacterized protein
TcCLB.503487.70	Q4CYL7	1.0218	0.476485	Uncharacterized protein
TcCLB.504047.50	Q4D7T7	1.02092	0.469154	Uncharacterized protein
TcCLB.508909.210	Q4E1K7	1.02072	0.476053	Uncharacterized protein
TcCLB.507927.20	Q4D590	1.02037	0.442765	Mitochondrial oligo_U binding protein TBRGG1, putative
TcCLB.511801.60	Q4D7H6	1.01889	0.484104	Mitochondrial DEAD box protein, putative
TcCLB.507569.10	Q4CTC8	1.01776	0.466339	Uncharacterized protein
TcCLB.509065.90	Q4DHE8	1.01416	0.481061	Uncharacterized protein
TcCLB.511319.20	Q4CU87	1.01402	0.477264	Uncharacterized protein
TcCLB.508965.100	Q4DL85	1.01365	0.490022	Uncharacterized protein
TcCLB.511585.190	Q4E162	1.01364	0.478781	Probable eukaryotic initiation factor 4A
TcCLB.509203.40	Q4D8L7	1.01317	0.476889	Glycosomal membrane protein, putative
TcCLB.511277.170	Q4E5H7	1.01163	0.492726	ATP-dependent zinc metallopeptidase, putative
TcCLB.510669.20	Q4CR48	1.01099	0.484881	Gim5A protein, putative
TcCLB.506025.4	Q4D1S6	1.01059	0.492134	Membrane-bound acid phosphatase, putative (Fragment)
TcCLB.508441.20	Q4DB81	1.0097	0.423791	Glycosomal phosphoenolpyruvate carboxykinase, putative
TcCLB.503815.10	Q4CRU8	1.00851	0.494406	Alkylglycerone-phosphate synthase
TcCLB.506127.50	Q4DP94	1.00827	0.48355	Uncharacterized protein
TcCLB.504231.10	Q4CSH5	1.00649	0.494937	Uncharacterized protein
TcCLB.506789.334	Q4DZV6	1.00425	0.491091	Uncharacterized protein
TcCLB.403875.10	Q4CME6	1.00272	0.498178	D-alanyl-glycyl endopeptidase-like protein, putative
TcCLB.511865.90	Q4D3Z5	1.0026	0.498071	Dynein heavy chain, putative (Fragment)
TcCLB.508445.20	Q4D4J5	-1.00049	0.498411	Superoxide dismutase
TcCLB.507555.80	Q4D5T6	-1.00339	0.495711	Retrotransposon hot spot (RHS) protein, putative
TcCLB.509895.20	Q4DCY2	-1.00387	0.48918	Uncharacterized protein
TcCLB.503887.40	Q4CYT8	-1.00482	0.488552	Uncharacterized protein
TcCLB.509233.180	Q4DTX7	-1.00528	0.496595	ATP synthase subunit beta
TcCLB.506989.220	Q4DW86	-1.0054	0.496655	Uncharacterized protein
TcCLB.506795.90	Q4DA79	-1.00582	0.491778	Uncharacterized protein
TcCLB.509589.20	Q4D1U2	-1.00651	0.489302	Squalene monooxygenase, putative
TcCLB.510355.269	Q4DXF7	-1.00711	0.491308	Cytochrome b5, putative (Fragment)
TcCLB.510761.44	Q4DG41	-1.00726	0.493006	Cyclophilin-like protein, putative
TcCLB.506595.149	Q4DLB9	-1.00869	0.473135	Retrotransposon hot spot (RHS) protein, putative (Fragment)
TcCLB.508515.20	Q4DM75	-1.00942	0.481506	Protein translation factor SUI1 homolog, putative
TcCLB.506303.80	Q4DN44	-1.01007	0.476614	Uncharacterized protein
TcCLB.507831.60	Q4DI67	-1.01039	0.493987	Heat shock protein, putative
TcCLB.509129.10	Q4CLT3	-1.0109	0.494228	Uncharacterized protein
TcCLB.507241.39	Q4CWA4	-1.01111	0.487581	ABC transporter, putative (Fragment)
TcCLB.506753.230	Q4DLW7	-1.01273	0.493842	Uncharacterized protein
TcCLB.511277.160	Q4E5H8	-1.01302	0.473394	Ribosomal protein
TcCLB.507669.84	Q4DRW4	-1.01463	0.490581	ATP-dependent DEAD/H RNA helicase, putative
TcCLB.506113.60	Q4DBH8	-1.01724	0.477636	Retrotransposon hot spot (RHS) protein, putative
TcCLB.509965.220	Q4E0T7	-1.01773	0.487918	Uncharacterized protein
TcCLB.504021.109	Q4DMK9	-1.0179	0.442898	40S ribosomal protein S3, putative
TcCLB.508899.54	Q4DMP7	-1.01917	0.481919	Uncharacterized protein
TcCLB.506201.39	Q4DG86	-1.01977	0.484355	25 kDa translation elongation factor 1-beta, putative
TcCLB.506393.189	Q4DL82	-1.02038	0.484763	Retrotransposon hot spot (RHS) protein, putative (Fragment)
TcCLB.508307.170	Q4DRX6	-1.02419	0.461911	60S acidic ribosomal protein, putative
TcCLB.507167.20	Q4DYW4	-1.02427	0.45969	Retrotransposon hot spot (RHS) protein, putative
TcCLB.507715.34	Q4DEC3	-1.02463	0.442175	Uncharacterized protein
TcCLB.506885.320	Q4E4H1	-1.02514	0.469129	Uncharacterized protein
TcCLB.506593.19	Q4CUC8	-1.0262	0.393666	Ribosomal protein S7, putative
TcCLB.504431.64	Q4D714	-1.02626	0.466221	High mobility group protein, putative
TcCLB.506815.60	Q4CV79	-1.02811	0.481364	60S ribosomal protein L44, putative
TcCLB.506559.410	Q4E589	-1.0294	0.458346	Uncharacterized protein
TcCLB.510439.61	Q4CU95	-1.03065	0.409852	Heat shock 70 kDa protein, putative (Fragment)
TcCLB.507927.60	Q4D586	-1.03071	0.465646	Uncharacterized protein
TcCLB.511807.190	Q4E1C6	-1.03309	0.415051	Uncharacterized protein
TcCLB.506679.140	Q4E088	-1.03373	0.411356	40S ribosomal protein S10, putative
TcCLB.510783.49	Q4CZ48	-1.03437	0.336339	Cytochrome c oxidase subunit 10, putative
TcCLB.509749.33	Q4CPD8	-1.03532	0.464369	Ribosomal protein L29, putative
TcCLB.505939.80	Q4D6K4	-1.036	0.475098	Uncharacterized protein
TcCLB.506441.20	Q4CSI2	-1.03646	0.479855	Uncharacterized protein
TcCLB.509767.230	Q4DSB1	-1.03816	0.42843	Uncharacterized protein
TcCLB.508813.60	Q4D6Y1	-1.03995	0.42637	Uncharacterized protein
TcCLB.508799.240	Q4DZJ3	-1.04028	0.468886	Aminopeptidase, putative
TcCLB.509105.70	Q4DKI7	-1.04046	0.442971	Thiol-dependent reductase 1, putative
TcCLB.506247.40	Q4E152	-1.04076	0.417239	Uncharacterized protein
TcCLB.510359.170	Q4E554	-1.043	0.470292	AAA ATPase, putative
TcCLB.509859.40	Q4D4Y0	-1.04725	0.371306	Cytosolic leucyl aminopeptidase, putative
TcCLB.511277.60	Q4E5I9	-1.05199	0.431759	Alcohol dehydrogenase, putative
TcCLB.508169.20	Q4D5X0	-1.05206	0.303903	Elongation factor 2, putative
TcCLB.509671.120	Q4DJZ0	-1.05306	0.406078	rRNA processing protein, putative
TcCLB.506721.30	Q4D6J0	-1.05453	0.467595	Calpain-like cysteine peptidase, putative
CYP51	Q7Z1V1	-1.05532	0.436362	Sterol 14-alpha demethylase
TcCLB.511229.50	Q4D455	-1.05549	0.417384	Adenosylhomocysteinase
TcCLB.505999.90	Q4DNV8	-1.05596	0.45382	Phosphoglycerate kinase
TcCLB.506313.10	Q4CMJ5	-1.05654	0.372125	Retrotransposon hot spot (RHS) protein, putative (Fragment)
TcCLB.509063.10	Q4CPH7	-1.05658	0.409193	Uncharacterized protein
TcCLB.503919.40	Q4D2K2	-1.05676	0.462214	Uncharacterized protein
TcCLB.503539.30	Q4CP51	-1.05771	0.430138	GTP-binding nuclear protein
TcCLB.506525.130	Q4DK22	-1.05849	0.459735	Mitochondrial carrier protein, putative
TcCLB.508277.40	Q4E0Z3	-1.06015	0.459482	Uncharacterized protein
TcCLB.506357.130	Q4DY15	-1.06304	0.43068	Uncharacterized protein
TcCLB.508741.229	Q4E349	-1.064	0.190403	Uncharacterized protein
TcCLB.509151.140	Q4DI49	-1.06414	0.353683	60S ribosomal protein L23a, putative
TcCLB.507739.20	Q4DAV1	-1.06519	0.46395	Mitochondrial ATP-dependent zinc metallopeptidase, putative
TcCLB.508277.220	Q4E0X4	-1.06598	0.449509	Uncharacterized protein
TcCLB.508045.70	Q4DIN9	-1.07184	0.449915	Uncharacterized protein
TcCLB.504423.30	Q4CYL3	-1.07192	0.38228	Uncharacterized protein
TcCLB.508231.40	Q4DW67	-1.07215	0.326224	Uncharacterized protein
TcCLB.510029.70	Q4CWD6	-1.07305	0.165327	40S ribosomal protein S13, putative
TcCLB.511289.70	Q4DD13	-1.0736	0.256456	ADP,ATP carrier protein 1, mitochondrial, putative
TcCLB.511517.37	Q4DMU8	-1.07439	0.435527	Reticulon-like protein
TcCLB.510509.50	Q4CVB9	-1.07536	0.399388	Mitochondrial RNA binding protein, putative (Fragment)
TcCLB.511353.10	Q4CZN2	-1.07577	0.365926	Peptidylprolyl isomerase
TcCLB.504131.190	Q4DMB4	-1.07584	0.438589	Mitochondrial carrier protein, putative
TcCLB.510421.220	Q4DXR0	-1.07975	0.395647	Uncharacterized protein
TcCLB.505163.80	Q4D2C9	-1.0806	0.44677	Oligosaccharyl transferase subunit, putative
TcCLB.509777.70	Q4DIM7	-1.08191	0.393276	Calcium-transporting ATPase
TcCLB.509997.30	Q4D1B8	-1.08412	0.332539	Tryparedoxin, putative
TcCLB.506839.70	Q4DCU2	-1.08437	0.43471	NADH dehydrogenase, putative
TcCLB.503419.30	Q4CZ29	-1.08481	0.456789	Thiol-dependent reductase 1, putative
TcCLB.504105.20	Q4DZB0	-1.08658	0.356084	Eukaryotic translation initiation factor 5, putative
TcCLB.508175.146	Q4E2Y1	-1.08749	0.355316	60S ribosomal protein L23a, putative
TcCLB.509539.50	Q4D318	-1.08753	0.279734	Small GTP-binding protein, putative
TcCLB.504057.40	Q4DSF3	-1.08786	0.414945	Uncharacterized protein
TcCLB.511101.19	Q4CVW3	-1.08787	0.403339	Retrotransposon hot spot (RHS) protein, putative
TcCLB.511181.50	Q4DPR3	-1.08833	0.40411	Mitochondrial processing peptidase, beta subunit, putative
TcCLB.506581.30	Q4CY21	-1.0897	0.279606	Eukaryotic translation initiation factor 3 (EIF-3) interacting protein, putative
TcCLB.506295.130	Q4DEQ3	-1.08973	0.209256	Prohibitin, putative
TcCLB.504033.80	Q4DR74	-1.09138	0.150924	Uncharacterized protein
TcCLB.509859.10	Q4D4Y3	-1.09185	0.290847	Uncharacterized protein
TcCLB.506167.20	Q4D5X5	-1.09307	0.432234	Uncharacterized protein
TcCLB.508479.270	Q4E2J4	-1.09516	0.305226	Uncharacterized protein
TcCLB.510105.50	Q4DZU7	-1.09852	0.329462	Fibrillarin, putative
TcCLB.506445.60	Q4DHG5	-1.1021	0.0702734	DNA topoisomerase 2
TcCLB.509109.30	Q4DQN2	-1.11022	0.235377	Uncharacterized protein
TcCLB.506943.160	Q4DCN0	-1.11068	0.269393	Eukaryotic translation initiation factor 3 subunit 7-like protein, putative
TcCLB.509567.50	Q4CZU1	-1.11381	0.388511	Uncharacterized protein
TcCLB.506155.10	Q4DFG8	-1.1172	0.403309	Uncharacterized protein
TcCLB.506925.470	Q4E4K5	-1.11896	0.420055	Heat shock protein DnaJ, putative
TcCLB.510877.30	Q4DPV7	-1.1197	0.256612	Uncharacterized protein
TcCLB.511301.120	Q4DM81	-1.12031	0.424946	Uncharacterized protein
TcCLB.506507.10	Q4CZT5	-1.12357	0.394795	N-acetylglucosamine-6-phosphate deacetylase-like protein, putative (Fragment)
TcCLB.511283.10	Q4E2V9	-1.12492	0.300965	Uncharacterized protein
TcCLB.507641.290	Q4DYP5	-1.12783	0.285613	Chaperonin HSP60, mitochondrial
TcCLB.511635.10	Q4CTD8	-1.12914	0.357435	Histone H2B
TcCLB.510007.70	Q4DBP0	-1.12956	0.361584	ATP-dependent zinc metallopeptidase, putative
TcCLB.506963.14	Q4DN73	-1.13016	0.339091	40S ribosomal protein S27, putative
TcCLB.508461.80	Q4E4V7	-1.13146	0.246535	Prostaglandin F2alpha synthase
TcCLB.509505.50	Q4D000	-1.13453	0.295827	10 kDa heat shock protein, putative
TcCLB.510187.30	Q4E4E7	-1.13695	0.247026	Tyrosine aminotransferase
TcCLB.508045.30	Q4DIP2	-1.13743	0.413069	Uncharacterized protein
TcCLB.510187.290	Q4E4C2	-1.14239	0.252978	ATP-dependent DEAD/H RNA helicase, putative
TcCLB.507059.60	Q4DBC5	-1.14248	0.351486	Orotidine-5-phosphate decarboxylase/orotate phosphoribosyltransferase, putative
TcCLB.508153.1110	Q4E5Y4	-1.14274	0.406463	Arginine N-methyltransferase, putative
TcCLB.505843.10	Q4CVH4	-1.14717	0.220695	Glutamate dehydrogenase, putative (Fragment)
TcCLB.507091.50	Q4DGV1	-1.14747	0.430113	Aspartate carbamoyltransferase, putative
TcCLB.509561.20	Q4DDW3	-1.14878	0.349211	Flagellum-adhesion glycoprotein, putative
TcCLB.510119.20	Q4CXI1	-1.14963	0.29999	Elongation factor 1-alpha
TcCLB.511211.170	Q4DTM8	-1.14965	0.19873	Heat shock protein 70 (HSP70), putative
TcCLB.508479.340	Q4E2I6	-1.15006	0.289147	Succinyl-CoA synthetase alpha subunit, putative
TcCLB.506629.200	Q4DQC4	-1.15108	0.255311	Uncharacterized protein
TcCLB.457339.10	Q4CKU9	-1.15399	0.243601	U6 snRNA-associated Sm-like protein LSm4, putative
TcCLB.506123.40	Q4CYD2	-1.15514	0.0792057	Nucleolar RNA helicase II, putative
TcCLB.506297.240	Q4E0P5	-1.15905	0.340519	Pretranslocation protein, alpha subunit, putative
TcCLB.457251.10	Q4CM68	-1.1609	0.311109	3-oxo-5-alpha-steroid 4-dehydrogenase, putative (Fragment)
TcCLB.508277.230	Q4E0X3	-1.16436	0.364077	Nucleolar RNA binding protein, putative
TcCLB.508815.80	Q4DMJ6	-1.16451	0.398314	Uncharacterized protein
TcCLB.509611.80	Q4DK98	-1.16819	0.309094	Cation-transporting ATPase
TcCLB.506959.120	Q4DIC9	-1.16946	0.376145	60S ribosomal protein L30, putative
TcCLB.511047.40	Q4D0C0	-1.17102	0.302451	NADH-cytochrome b5 reductase
TcCLB.507681.150	Q4DW38	-1.17184	0.223091	40S ribosomal protein S24
TcCLB.504033.90	Q4DR73	-1.17573	0.389958	Mitochondrial carrier protein, putative
TcCLB.510285.60	Q4DIT2	-1.17627	0.38141	2-methoxy-6-polyprenyl-1,4-benzoquinol methylase, mitochondrial
TcCLB.504105.140	Q4DZ98	-1.17672	0.127521	Enolase, putative
TcCLB.507625.10	Q4DPF1	-1.17857	0.254753	Retrotransposon hot spot (RHS) protein, putative
TcCLB.511573.58	Q4CU30	-1.179	0.218392	Nucleolar protein, putative (Fragment)
TcCLB.507659.20	Q4CQK7	-1.18101	0.355115	Amino acid transporter, putative
TcCLB.506211.160	Q4DYK2	-1.18133	0.414596	ADP,ATP carrier protein 1, mitochondrial, putative
TcCLB.507951.160	Q4DUS2	-1.18536	0.373536	Uncharacterized protein
TcCLB.509391.10	Q4D1Q2	-1.18799	0.20531	Calcium-binding protein, putative
TcCLB.511287.90	Q4DJ02	-1.19154	0.339421	Ribosome biogenesis protein, putative
TcCLB.509767.70	Q4DSC7	-1.19486	0.36343	V-type proton ATPase subunit a
TcCLB.511071.140	Q4DI02	-1.19518	0.279511	2-amino-3-ketobutyrate coenzyme A ligase, putative
TcCLB.511627.110	Q4D832	-1.19545	0.379573	Heat shock protein DnaJ, putative
TcCLB.505989.82	Q4D5M2	-1.19912	0.395568	RuvB-like helicase
TcCLB.506223.80	Q4DEY4	-1.19976	0.372145	ATP-dependent zinc metallopeptidase, putative
TcCLB.510381.10	Q4CYV4	-1.2033	0.281119	Cystathionine beta-synthase, putative
TcCLB.509611.20	Q4DKA4	-1.20408	0.360115	Peptidyl-prolyl cis-trans isomerase
TcCLB.507641.64	Q4DYS0	-1.20546	0.323848	Uncharacterized protein
TcCLB.507963.44	Q4D5Y2	-1.2056	0.310216	Uncharacterized protein
TcCLB.508461.410	Q4E4R8	-1.20648	0.35783	T-complex protein 1, eta subunit, putative
TcCLB.508153.460	Q4E644	-1.20831	0.385885	Uncharacterized protein
TcCLB.503833.40	Q4DIZ9	-1.20919	0.0154683	40S ribosomal protein S2, putative
TcCLB.503477.20	Q4CUD7	-1.21838	0.342976	Transaldolase
TcCLB.510719.20	Q4DXV7	-1.22134	0.34827	Short-chain dehydrogenase, putative
TcCLB.510763.109	Q4D1M6	-1.22622	0.234398	rRNA processing protein, putative (Fragment)
TcCLB.503829.80	Q4D1S8	-1.22915	0.32296	Uncharacterized protein
TcCLB.506925.530	Q4E4J9	-1.23116	0.280309	ABC transporter, putative
TcCLB.506925.319	Q4E4L7	-1.23343	0.27099	Isocitrate dehydrogenase [NADP]
TcCLB.507609.40	Q4DFC3	-1.23468	0.2249	Delta-6 fatty acid desaturase, putative
TcCLB.511263.9	Q4D673	-1.23719	0.123073	Heat shock protein, putative (Fragment)
TcCLB.508285.10	Q4D826	-1.24456	0.300014	Retrotransposon hot spot (RHS) protein, putative
TcCLB.504421.19	Q4CR23	-1.24664	0.367394	Uncharacterized protein
TcCLB.506989.30	Q4DWA3	-1.2521	0.0756921	ABC transporter, putative
TcCLB.507305.20	Q4CQE6	-1.25217	0.323088	Casein kinase, putative
TcCLB.509877.60	Q4CYY8	-1.2627	0.277999	Uncharacterized protein
TcCLB.506727.50	Q4DAN2	-1.26647	0.258375	Uncharacterized protein
TcCLB.510773.110	Q4DGF8	-1.26845	0.294586	Uncharacterized protein
TcCLB.504741.20	Q4DTU3	-1.26933	0.150969	Obg-like ATPase 1
TcCLB.511391.160	Q4DU59	-1.26943	0.188464	Cytochrome c1, heme protein, mitochondrial, putative
TcCLB.506321.280	Q4DYE0	-1.27124	0.0603264	Uncharacterized protein
TcCLB.511385.30	Q4DKH4	-1.27426	0.299068	Vacuolar-type proton translocating pyrophosphatase 1, putative
TcCLB.511809.120	Q4DGZ6	-1.27509	0.0968546	Uncharacterized protein
TcCLB.509213.100	Q4DGX8	-1.2753	0.19481	Uncharacterized protein
TcCLB.510741.180	Q4DRK9	-1.27656	0.261708	ATP-dependent RNA helicase, putative
TcCLB.506493.80	Q4DE64	-1.27898	0.330174	DNA topoisomerase
TcCLB.511807.280	Q4E1B7	-1.28024	0.243671	Uncharacterized protein
TcCLB.505647.40	Q4CQG3	-1.28183	0.251159	Endoribonuclease L-PSP (Pb5), putative
TcCLB.509471.59	Q4CZH3	-1.28337	0.195602	Histone H3, putative
TcCLB.506925.120	Q4E4N4	-1.28972	0.252182	Eukaryotic translation initiation factor 5A
TcCLB.508303.4	Q4DE00	-1.29248	0.312851	Ubiquitin-conjugating enzyme E2, putative
TcCLB.510431.160	Q4DXX8	-1.29326	0.162217	Nucleolar GTP-binding protein 1
TcCLB.511025.100	Q4DD34	-1.29479	0.345394	Chaperone DnaJ protein, putative
TcCLB.508461.270	Q4E4T4	-1.29893	0.272591	Rab7 GTP binding protein, putative
TcCLB.506127.110	Q4DP89	-1.29932	0.187277	Eukaryotic peptide chain release factor subunit 1, putative
TcCLB.509583.10	Q4CPG3	-1.29975	0.315094	Chaperonin TCP20, putative
TcCLB.511907.200	Q4DY71	-1.30395	0.308602	Cysteine peptidase inhibitor, putative
TcCLB.509499.14	Q4CX87	-1.30413	0.284891	Tryparedoxin peroxidase, putative
TcCLB.508851.180	Q4DJB6	-1.30512	0.350052	14-3-3 protein, putative
TcCLB.506443.70	Q4DMF2	-1.30677	0.200484	Glutathione-S-transferase/glutaredoxin, putative
TcCLB.509643.70	Q4DBN3	-1.30693	0.0908918	Uncharacterized protein
TcCLB.508045.100	Q4DIN6	-1.30748	0.302922	Uncharacterized protein
TcCLB.411235.9	Q4CLA1	-1.30955	0.184113	Tubulin alpha chain
TcCLB.506249.70	Q4CX07	-1.3104	0.239402	ABC transporter, putative
TcCLB.507611.110	Q4E3H1	-1.31091	0.301311	Retrotransposon hot spot (RHS) protein, putative
TcCLB.504069.70	Q4DAV7	-1.32297	0.247308	V-type proton ATPase proteolipid subunit
TcCLB.506529.360	Q4E5P5	-1.32796	0.265969	Cytochrome C oxidase subunit IV, putative
TcCLB.509233.60	Q4DTY4	-1.32951	0.241756	Uncharacterized protein
TcCLB.508665.14	Q4CNM5	-1.33058	0.282789	ATP-dependent Clp protease subunit, heat shock protein 100 (HSP100), putative (Fragment)
TcCLB.506585.40	Q4D620	-1.33513	0.0340354	Glucose-regulated protein 78, putative
TcCLB.508503.20	Q4D214	-1.33541	0.0423536	Cytochrome c oxidase subunit V, putative
TcCLB.510003.20	Q4D3R4	-1.33896	0.298236	Uncharacterized protein
TcCLB.511367.340	Q4DYG2	-1.34055	0.196207	Mitochondrial processing peptidase alpha subunit, putative
TcCLB.510741.150	Q4DRL1	-1.34195	0.352383	Uncharacterized protein
TcCLB.506885.340	Q4E4G9	-1.34346	0.0471811	Uncharacterized protein
TcCLB.506773.44	Q4DQF8	-1.34713	0.0471052	Cytochrome b5, putative
TcCLB.506989.190	Q4DW89	-1.34926	0.307861	Lipophosphoglycan biosynthetic protein, putative
TcCLB.506649.80	Q4DE30	-1.3497	0.313533	RNA-binding protein, putative
TcCLB.511321.10	Q4DCG3	-1.35233	0.329812	FG-GAP repeat protein, putative
TcCLB.507017.40	Q4DFE2	-1.36093	0.337624	2-hydroxy-3-oxopropionate reductase, putative
TcCLB.509857.60	Q4D2J3	-1.3642	0.187226	Uncharacterized protein
TcCLB.508461.370	Q4E4S2	-1.36453	0.268829	Uncharacterized protein
TcCLB.510643.190	Q4DWU4	-1.36601	0.244818	Retrotransposon hot spot (RHS) protein, putative
TcCLB.506925.300	Q4E4L9	-1.37593	0.167682	Peptidyl-prolyl cis-trans isomerase
TcCLB.506943.50	Q4DCN9	-1.37613	0.134992	Glyceraldehyde-3-phosphate dehydrogenase
TcCLB.509551.70	Q4DJJ4	-1.37805	0.198925	Uncharacterized protein
TcCLB.508355.250	Q4E3A4	-1.3842	0.0575981	60S acidic ribosomal protein P0
TcCLB.509797.40	Q4D2F2	-1.38517	0.288271	Isoleucyl-tRNA synthetase, putative
TcCLB.504191.10	Q4CMB7	-1.38648	0.199701	Methyltransferase
TcCLB.510759.120	Q4DS82	-1.39191	0.276607	Reiske iron-sulfur protein, putative
TcCLB.504427.60	Q4DYN8	-1.39593	0.219072	Uncharacterized protein
TcCLB.508827.70	Q4DK40	-1.40158	0.141778	40S ribosomal protein S17, putative
TcCLB.508173.264	Q4DV61	-1.40195	0.131063	Uncharacterized protein
TcCLB.511239.110	Q4DJ35	-1.402	0.191172	Uncharacterized protein
TcCLB.508277.120	Q4CQQ9	-1.40222	0.15532	Ribosomal protein S6, putative
TcCLB.511421.200	Q4DWP4	-1.40662	0.0675643	Uncharacterized protein
TcCLB.506507.20	Q4CZT4	-1.41023	0.190515	Uncharacterized protein
TcCLB.509023.110	Q4DRN5	-1.41082	0.197896	Heat shock protein HslVU, ATPase subunit HslU, putative
TcCLB.504203.40	Q4CX49	-1.41154	0.351921	Uncharacterized protein
TcCLB.506491.20	Q4D1D3	-1.41273	0.289416	Myosin heavy chain, putative (Fragment)
TcCLB.509733.170	Q4DWB5	-1.41334	0.177206	Transitional endoplasmic reticulum ATPase, putative
TcCLB.503575.27	Q4D206	-1.41457	0.198884	Uncharacterized protein
TcCLB.511029.20	Q4CN27	-1.41951	0.199813	Kinetoplast DNA-associated protein, putative
TcCLB.510571.30	Q4CYQ8	-1.42439	0.305438	Actin, putative
TcCLB.507093.320	Q4E1M6	-1.43188	0.227284	Uncharacterized protein
TcCLB.407477.50	Q4CSY1	-1.44311	0.26467	Cytochrome c oxidase VIII (COX VIII), putative
TcCLB.510629.460	Q4E3W3	-1.44371	0.284497	Uncharacterized protein
TcCLB.468941.9	Q4CKM6	-1.45322	0.208848	ATP-dependent DEAD/H RNA helicase, putative (Fragment)
TcCLB.508355.330	Q4E396	-1.47234	0.269843	Uncharacterized protein
TcCLB.503849.60	Q4D779	-1.47284	0.210843	NADH-dependent fumarate reductase, putative
TcCLB.510823.70	Q4D991	-1.48567	0.297471	60S acidic ribosomal protein, putative
TcCLB.510099.120	Q4DAE1	-1.48666	0.0355748	D-isomer specific 2-hydroxyacid dehydrogenase-protein, putative
TcCLB.509215.40	Q4D2G4	-1.48856	0.305635	Peptidyl-prolyl cis-trans isomerase
TcCLB.507093.260	Q4E1N1	-1.49351	0.235567	ABC transporter, putative
TcCLB.511293.69	Q4DDK8	-1.49727	0.173134	Glycosomal malate dehydrogenase, putative
TcCLB.509719.40	Q4D7J7	-1.49737	0.253333	Cytochrome P450, putative
TcCLB.504045.110	Q4D9S6	-1.49968	0.289782	Urocanate hydratase, putative
TcCLB.509409.10	Q4CLI0	-1.50354	0.229584	Protein kinase, putative
TcCLB.511283.220	Q4E2T7	-1.50547	0.176211	Uncharacterized protein
TcCLB.508461.310	Q4E4S9	-1.50867	0.157434	Protein kinase A catalytic subunit isoform 1, putative
TcCLB.463155.20	Q4CU66	-1.51699	0.17755	Retrotransposon hot spot (RHS) protein, putative
TcCLB.503899.119	Q4DEJ5	-1.51779	0.135062	Glutathione peroxidase
TcCLB.511383.50	Q4D8I7	-1.51795	0.224437	Prohibitin, putative
TcCLB.509551.30	Q4DJJ9	-1.53173	0.0768476	Mitochondrial phosphate transporter, putative
TcCLB.509063.30	Q4CPH5	-1.53255	0.116614	Chaperonin HSP60/CNP60, putative (Fragment)
TcCLB.506195.210	Q4DXK5	-1.53654	0.301237	Uncharacterized protein
TcCLB.506503.56	Q4DRE0	-1.54173	0.130362	Uncharacterized protein
TcCLB.506399.80	Q4D4H2	-1.56236	0.163296	Uncharacterized protein
TcCLB.508257.150	Q4DX43	-1.56366	0.0835038	Small nuclear ribonucleoprotein SmD3, putative
TcCLB.509233.80	Q4DTY2	-1.57621	0.224386	Heat shock protein DnaJ, putative
TcCLB.506859.180	Q4DVF8	-1.57958	0.223804	Uncharacterized protein
TcCLB.511287.140	Q4DIZ6	-1.58098	0.277798	Uncharacterized protein
TcCLB.509213.120	Q4DGX6	-1.58506	0.182291	Peptidase M20/M25/M40, putative
TcCLB.504153.280	Q4E2Q5	-1.58745	0.103499	Uncharacterized protein
TcCLB.510825.30	Q4CNU0	-1.59373	0.191901	Lysosomal/endosomal membrane protein p67, putative
TcCLB.511293.40	Q4DDL1	-1.59865	0.193524	U3 snoRNA-associated protein UTP11, putative
TcCLB.507167.240	Q4DYV8	-1.59928	0.156786	Retrotransposon hot spot (RHS) protein, putative
GMPR	Q4DFE7	-1.6193	0.196711	GMP reductase
TcCLB.511809.130	Q4DGZ5	-1.62113	0.115166	40S ribosomal protein S15, putative
TcCLB.504147.10	Q4DZP3	-1.63208	0.0968175	Uncharacterized protein
TcCLB.503453.64	Q4D8K0	-1.64313	0.12404	Uncharacterized protein
TcCLB.508541.230	Q4DN94	-1.64714	0.165046	Casein kinase, putative
TcCLB.511287.110	Q4DJ00	-1.66563	0.214101	Uncharacterized protein
TcCLB.508355.160	Q4E3B2	-1.67875	0.136346	Uncharacterized protein
TcCLB.508717.30	Q4D9I0	-1.67953	0.275229	Phosphoribosylpyrophosphate synthetase, putative
TcCLB.504125.60	Q4DFR8	-1.68919	0.11583	Kinesin-like protein
TcCLB.511815.180	Q4DJ91	-1.69733	0.182094	Uncharacterized protein
TcCLB.511837.40	Q4DCA0	-1.70009	0.17726	Uncharacterized protein
TcCLB.508647.280	Q4DV36	-1.70029	0.154495	Malic enzyme
TcCLB.511421.50	Q4DWQ7	-1.70213	0.167713	Uncharacterized protein
TcCLB.505183.20	Q4DJ69	-1.70235	0.133111	Malic enzyme
TcCLB.506885.200	Q4E4I1	-1.70485	0.160001	Uncharacterized protein
TcCLB.511491.70	Q4DHP3	-1.74344	0.167759	Transmembrane 9 superfamily member
TcCLB.510821.60	Q4CZG5	-1.75711	0.192641	Ribonucleoprotein p18, mitochondrial, putative
#These identifications were filtered out by the L-stringency and so deserve further experimentation to verify if they are indeed differentially expressed
TcCLB.503925.20	Q4DAQ9	4.72164	0.025215	Uncharacterized protein
TcCLB.503999.50	Q4D439	4.10511	0.0129049	Ubiquitin-conjugating enzyme-like, putative
TcCLB.509395.50	Q4DJR2	3.6328	0.0116884	Uncharacterized protein
TcCLB.506821.210	Q4DNM4	3.30649	0.0397477	NADH-cytochrome b5 reductase
TcCLB.507069.150	Q4DVJ8	3.19754	0.00912885	Mucin-associated surface protein (MASP), putative
TcCLB.503935.20	Q4CNP4	3.18852	0.000535738	2-oxoglutarate dehydrogenase, E2 component, dihydrolipoamide succinyltransferase, putative
TcCLB.506885.70	Q4E4I9	3.02563	0.0181473	Polyadenylate-binding protein
TcCLB.510879.30	Q4DJY0	3.0241	0.0123557	Uncharacterized protein
TcCLB.511047.50	Q4D0B9	2.97343	0.0293228	Proteasome regulatory ATPase subunit 2, putative
TcCLB.508479.213	Q4E2K2	2.88898	0.0179894	Uncharacterized protein
TcCLB.509769.60	Q4DKU9	2.82571	0.00821127	Uncharacterized protein
TcCLB.511237.100	Q4D7C4	2.81665	0.0311789	Uncharacterized protein
TcCLB.511303.150	Q4DSK1	2.56565	0.0107197	Uncharacterized protein
TcCLB.503479.70	Q4D6Z0	2.47596	0.0198199	Uncharacterized protein
TcCLB.508999.190	Q4E0D8	2.47452	0.00480024	Calpain-like cysteine peptidase, putative
TcCLB.509245.10	Q4CM96	2.39547	0.0181351	Uncharacterized protein (Fragment)
TcCLB.511277.420	Q4E5F2	2.37548	0.0363646	Uncharacterized protein
TcCLB.504109.160	Q4DR32	2.19882	0.0433987	Electron transfer flavoprotein, putative
TcCLB.507001.110	Q4DF18	2.18733	0.0282659	Galactokinase-like protein, putative
TcCLB.511303.60	Q4DSL1	2.15326	0.0331435	Translation initiation factor, putative
TcCLB.506355.10	Q4DKD0	2.1094	0.0223198	Hexose transporter, putative
TcCLB.504069.90	Q4DAV5	2.02944	0.0202728	Centromere/microtubule binding protein cbf5, putative
TcCLB.511393.49	Q4D3C0	1.97645	0.0431973	Uncharacterized protein
TcCLB.508821.40	Q4CXI6	1.94336	0.0413943	Uncharacterized protein
TcCLB.508409.220	Q4DWS4	1.9348	0.043807	Uncharacterized protein
TcCLB.509287.50	Q4E0B2	1.92797	0.00766873	Glucose-6-phosphate 1-dehydrogenase
TcCLB.507063.144	Q4E018	1.90708	0.0301614	Uncharacterized protein
TcCLB.510187.100	Q4E4E1	1.87511	0.0252796	Glucokinase 1, putative
TcCLB.508457.20	Q4CS27	1.86124	0.0490697	Uncharacterized protein
TcCLB.507105.50	Q4DAL7	1.85621	0.0395765	Uncharacterized protein
TcCLB.511761.60	Q4D8E8	1.72181	0.0111232	Uncharacterized protein
TcCLB.511281.60	Q4D9Z4	1.71088	0.0210103	Pyruvate kinase
TcCLB.511367.290	Q4DYG6	1.68692	0.025464	Uncharacterized protein
TcCLB.506773.130	Q4DQE9	1.64268	0.0208943	Pumilio-repeat, RNA-binding protein, putative
TcCLB.506125.20	Q4CN66	1.58821	0.0112341	Uncharacterized protein
TcCLB.509051.20	Q4CVL1	1.51195	0.0295856	Amastin, putative
TcCLB.509777.64	Q4DIM8	1.47059	0.00670624	ADG1-like protein, putative
TcCLB.506163.50	Q4D734	1.40254	0.00175637	Uncharacterized protein
TcCLB.509585.10	Q4CX46	-1.79573	0.030771	Dynein heavy chain, putative (Fragment)
TcCLB.509177.59	Q4CXT8	-2.03213	0.0367934	Uncharacterized protein
TcCLB.507017.20	Q4DFE4	-2.20355	0.0203887	Leucine-rich repeat protein, putative
TcCLB.507053.40	Q4DTK1	-2.32939	0.0256044	Uncharacterized protein
TcCLB.503803.10	Q4CR89	-2.34016	0.040457	rRNA biogenesis protein, putative
TcCLB.504089.60	Q4DE55	-2.3983	0.0432632	Uncharacterized protein
TcCLB.509911.74	Q4DFQ0	-2.44231	0.017691	Uncharacterized protein
TcCLB.508827.10	Q4DK47	-2.45663	0.0147472	Membrane-bound acid phosphatase, putative (Fragment)
TcCLB.510101.240	Q4E3N7	-2.46685	0.0497693	60S ribosomal protein L24, putative
TcCLB.503835.10	Q4CQ42	-2.55518	0.0195617	Uncharacterized protein
TcCLB.511277.570	Q4E5D7	-2.78625	0.0231454	60S ribosomal protein L7, putative
TcCLB.509767.170	Q4DSB7	-2.93502	0.0438947	Uncharacterized protein
TcCLB.508231.20	Q4DW69	-3.08944	0.0406103	40S ribosomal protein S12
TcCLB.507835.70	Q4DDX7	-3.1283	0.0219198	Dispersed gene family protein 1 (DGF-1), putative
TcCLB.508461.10	Q4E4W4	-3.81961	0.0459386	Uncharacterized protein
TcCLB.509109.130	Q4DQM3	-4.15591	0.0070543	Protein tyrosine phosphatase-like protein, putative
TcCLB.511807.200	Q4E1C5	-4.90852	0.00534819	Uncharacterized protein
TcCLB.506315.100	Q4D795	-5.0815	0.00519639	Protein phosphatase 2C, putative
TcCLB.507777.20	Q4CUW6	-7.69304	0.0118506	Uncharacterized protein

## Sheet: Pd-dppf-mpo unique insol prot
Pd-dppf-mpo unique insoluble proteins (ONLY CONTROL)
Gene ID	Uniprot ID	Replicate Count	Total Signal	Description
TcCLB.509167.80	Q4DQQ9	3	39	Uncharacterized protein
TcCLB.508475.10	Q4D6H7	3	29	Ribosomal protein S20, putative
TcCLB.511293.90	Q4DDK6	3	28	Uncharacterized protein
TcCLB.507895.124	Q4DJQ1	3	26	Uncharacterized protein
TcCLB.507811.60	Q4DDN8	3	21	Vesicle-associated membrane protein, putative
TcCLB.511511.150	Q4DT68	3	20	Sphingosine phosphate lyase-like protein, putative
TcCLB.509231.23	Q4D0S4	3	19	Uncharacterized protein
TcCLB.507159.30	Q4D0Z2	3	14	Uncharacterized protein
TcCLB.506925.104	Q4E4N7	3	14	Dynein light chain, putative
TcCLB.506413.20	Q4CXV7	3	14	40S ribosomal protein S33, putative
TcCLB.504013.60	Q4D6P2	3	13	Regulatory subunit of protein kinase a-like protein, putative
TcCLB.505555.20	Q4CVW2	3	9	Uncharacterized protein
TcCLB.507099.80	Q4DSH1	3	7	ABC transporter, putative
TcCLB.506925.14	Q4E4P8	3	6	Uncharacterized protein
TcCLB.509569.44	Q4DKT3	3	6	Uncharacterized protein
TcCLB.509509.50	Q4CWE3	3	6	Uncharacterized protein
TcCLB.511909.40	Q4D4X1	3	6	Succinate dehydrogenase [ubiquinone] flavoprotein subunit, mitochondrial
TcCLB.503945.10	Q4CQB1	3	6	Eukaryotic translation initiation factor 1A, putative (Fragment)
TcCLB.504057.140	Q4DSE0	3	5	ADP/ATP mitochondrial carrier protein, putative
TcCLB.509003.40	Q4CW63	2	72	Calpain-like cysteine peptidase, putative
TcCLB.508177.129	Q4DF36	2	42	Cystathionine beta-synthase, putative
TcCLB.510149.80	Q4DHQ7	2	31	ABC transporter, putative
TcCLB.510731.80	Q4D7P6	2	15	Uncharacterized protein
TcCLB.504069.20	Q4DAW5	2	15	Cytochrome C oxidase subunit VI, putative
TcCLB.507671.30	Q4CQA2	2	14	25 kDa translation elongation factor 1-beta
TcCLB.510339.54	Q4DA72	2	14	Uncharacterized protein
TcCLB.506147.170	Q4DT91	2	12	Uncharacterized protein
TcCLB.504103.20	Q4DBX3	2	10	Uncharacterized protein
TcCLB.509177.30	Q4CXU1	2	10	RNA cytidine acetyltransferase
TcCLB.506357.120	Q4DY16	2	9	Uncharacterized protein
TcCLB.511051.70	Q4D5P1	2	9	Aminopeptidase, putative
TcCLB.508479.216	Q4E2K1	2	8	Uncharacterized protein
TcCLB.510103.24	Q4CSY7	2	8	Uncharacterized protein
TcCLB.509631.140	Q4DSZ8	2	7	Uncharacterized protein
TcCLB.511635.40	Q4CTD5	2	7	Protein tyrosine phosphatase, putative
TcCLB.511381.60	Q4D131	2	7	Uncharacterized protein
TcCLB.506367.174	Q4DFV9	2	7	Uncharacterized protein
TcCLB.509065.124	Q4DHE4	2	7	U6 snRNA-associated Sm-like protein LSm5p
TcCLB.506661.30	Q4DHY1	2	7	Elongation of fatty acids protein
TcCLB.509401.30	Q4CMU6	2	7	Cysteine peptidase, putative
TcCLB.507511.30	Q4D3H7	2	7	RNA guanylyltransferase, putative
TcCLB.506211.130	Q4DYK5	2	6	Uncharacterized protein
TcCLB.503843.40	Q4CWW0	2	6	Chaperone DnaJ protein, putative (Fragment)
TcCLB.510125.10	Q4D0T3	2	6	Pumilio/PUF RNA binding protein 6, putative
TcCLB.509617.20	Q4D634	2	6	Paraflagellar rod protein 3, putative
TcCLB.509749.10	Q4CPE2	2	6	Biotin/lipoate protein ligase, putative
TcCLB.508805.20	Q4D5D6	2	5	Uncharacterized protein
TcCLB.503565.10	Q4CN11	2	5	Uncharacterized protein (Fragment)
TcCLB.510397.10	Q4D1P4	2	5	Uncharacterized protein
TcCLB.506587.70	Q4D8W9	2	5	Uncharacterized protein
TcCLB.511381.40	Q4D133	2	5	DNA-directed RNA polymerase I largest subunit, putative
TcCLB.509399.120	Q4DUM8	2	5	Uncharacterized protein
TcCLB.503923.50	Q4CYR4	2	4	Glycosylphosphatidylinositol (GPI) anchor, putative (Fragment)
TcCLB.503789.70	Q4CZL3	2	4	Uncharacterized protein
TcCLB.506625.240	Q4DUB8	2	4	Uncharacterized protein
TcCLB.507099.140	Q4DSG5	2	4	Transmembrane 9 superfamily member
TcCLB.507765.100	Q4DFU2	2	4	Uncharacterized protein
TcCLB.506755.260	Q4DWJ0	2	4	Mitochondrial RNA-binding protein 2, putative
TcCLB.510947.30	Q4CU92	2	3	Uncharacterized protein
TcCLB.504203.60	Q4CX47	2	3	DNA-J protein, putative (Fragment)
TcCLB.508831.120	Q4DX16	2	3	Acetyltransferase, putative
TcCLB.510877.180	Q4DPU1	2	3	Glycosylphosphatidylinositol (GPI) anchor, putative
TcCLB.507669.150	Q4DRV6	2	3	Glycosomal membrane protein, putative
TcCLB.506619.10	Q4DE25	2	3	Sedoheptulose-1,6-bisphosphatase, putative
TcCLB.505171.60	Q4D905	2	3	Uncharacterized protein
TcCLB.511249.10	Q4DDY8	2	3	ADP/ATP mitochondrial carrier protein, putative
TcCLB.504175.9	Q4CXG8	2	3	Uncharacterized protein (Fragment)
TcCLB.511021.70	Q4DAB4	2	3	ABC transporter, putative
TcCLB.511725.120	Q4DWI0	2	3	Uncharacterized protein
TcCLB.504115.30	Q4DTL8	2	3	Beta galactofuranosyl glycosyltransferase, putative
TcCLB.511807.250	Q4E1C2	2	2	Uncharacterized protein
TcCLB.509759.19	Q4CML9	2	2	Pumilio/PUF RNA binding protein 1, putative (Fragment)
TcCLB.510861.125	Q4DPH0	2	2	Uncharacterized protein
TcCLB.508837.130	Q4DUF6	2	2	Uncharacterized protein
TcCLB.506945.220	Q4DX78	2	2	Serine/arginine-rich protein specific kinase SRPK, putative
Pd-dppf-mpo unique insoluble proteins (ONLY TREATED)
Gene ID	Uniprot ID	Replicate Count	Total Signal	Description
TcCLB.508277.370	Q4E0W1	3	93	DNA topoisomerase 2
TcCLB.503781.90	Q4D8U5	3	14	Universal minicircle sequence binding protein (UMSBP), putative
TcCLB.507897.30	Q4CXF6	3	13	Serine/threonine-protein kinase A, putative
TcCLB.503715.10	Q4CZR2	3	13	Splicing factor TSR1, putative
TcCLB.511391.120	Q4DU62	3	12	Glutamamyl carboxypeptidase, putative
TcCLB.508153.490	Q4E641	3	12	Peptidyl-prolyl cis-trans isomerase
TcCLB.503959.78	Q4D3D1	3	11	Uncharacterized protein (Fragment)
TcCLB.511407.60	Q4D7V7	3	10	Small GTP-binding protein Rab11, putative
TcCLB.507765.110	Q4DFU1	3	7	Uncharacterized protein
TcCLB.509167.100	Q4DQQ7	3	6	Valyl-tRNA synthetase, putative
TcCLB.508647.220	Q4DV41	3	3	Uncharacterized protein
TcCLB.509979.70	Q4E2E2	2	37	Uncharacterized protein
TcCLB.510359.330	Q4E571	2	19	Uncharacterized protein
TcCLB.509735.120	Q4DQ04	2	19	Retrotransposon hot spot (RHS) protein, putative
TcCLB.503819.10	Q4CPV9	2	18	Uncharacterized protein
TcCLB.509167.20	Q4DQR5	2	18	3-hydroxy-3-methylglutaryl coenzyme A reductase
TcCLB.507211.40	Q4CUG6	2	14	Inosine-5'-monophosphate dehydrogenase
TcCLB.507817.80	Q4D0J3	2	12	5'-3' exonuclease XNRA, putative (Fragment)
TcCLB.506989.160	Q4DW91	2	11	Peroxisomal targeting signal type 2 receptor, putative
TcCLB.504017.40	Q4D100	2	10	Aminomethyltransferase
TcCLB.507005.60	Q4D2P9	2	10	Structural maintenance of chromosomes protein
TcCLB.511909.60	Q4D4W9	2	9	Uncharacterized protein
TcCLB.511071.130	Q4DI03	2	9	Basal body component, putative
TcCLB.509261.30	Q4CTQ3	2	8	3,2-trans-enoyl-CoA isomerase, mitochondrial, putative
TcCLB.509011.20	Q4DDX5	2	8	DNA-directed RNA polymerase subunit
TcCLB.510667.10	Q4DFI8	2	7	Uncharacterized protein
TcCLB.506627.20	Q4D9D2	2	7	Uncharacterized protein
TcCLB.508507.40	Q4CZP6	2	6	Uncharacterized protein
TcCLB.507649.20	Q4DHW4	2	5	Uncharacterized protein
TcCLB.506543.40	Q4D7T1	2	5	Uncharacterized protein
TcCLB.509631.60	Q4DT01	2	5	Dispersed gene family protein 1 (DGF-1), putative
TcCLB.510579.30	Q4D9M1	2	4	Pescadillo homolog
TcCLB.507073.40	Q4CX80	2	3	Uncharacterized protein
TcCLB.507927.100	Q4D582	2	3	Uncharacterized protein
TcCLB.506275.50	Q4D726	2	3	Golgi SNARE protein-like, putative
TcCLB.506203.129	Q4DN02	2	3	Mitochondrial DNA-directed RNA polymerase, putative (Fragment)
TcCLB.506315.60	Q4D799	2	3	Uncharacterized protein
TcCLB.507517.50	Q4D8U0	2	2	Uncharacterized protein
TcCLB.506249.60	Q4CX08	2	2	40S ribosomal protein S8, putative
TcCLB.506937.40	Q4CTR4	2	2	Dynein heavy chain, putative (Fragment)
TcCLB.504109.80	Q4DR40	2	2	Uncharacterized protein

## Sheet: Pt-dppf-mpo sol prot detected
Pt-dppf-mpo soluble protein detected
Gene ID	Uniprot ID	Fold Change	pValue	Description
#Identifications satisfied both, the automatic fold and statistical criteria.
TcCLB.509979.150	Q4E2D4	4.83903	0.00250569	Nitrilase, putative
TcCLB.508737.210	Q4DTG3	4.06863	0.0026054	Uncharacterized protein
TcCLB.510759.120	Q4DS82	3.71529	0.00220237	Reiske iron-sulfur protein, putative
TcCLB.511469.70	Q4DCI5	2.81661	0.00211043	Prohibitin, putative
TcCLB.506195.290	Q4DXJ7	2.75981	0.00276642	Uncharacterized protein
TcCLB.511827.100	Q4DQB0	2.74633	0.0152741	Cysteine peptidase C (CPC), putative
TcCLB.509717.90	Q4DMG1	2.57013	2.75174e-05	Short chain 3-hydroxyacyl-coa dehydrogenase, putative
TcCLB.509141.40	Q4CSK6	2.48649	0.000808524	Uncharacterized protein
TcCLB.506821.210	Q4DNM4	2.43801	0.00782299	NADH-cytochrome b5 reductase
TcCLB.510105.240	Q4DZT0	2.33656	0.000767432	Short chain 3-hydroxyacyl-coa dehydrogenase, putative
TcCLB.510039.40	Q4D9K8	2.28467	0.0193733	Nitrilase, putative
TcCLB.503959.78	Q4D3D1	2.26729	0.00573972	Uncharacterized protein (Fragment)
TcCLB.507259.10	Q4CM56	1.95949	0.00432493	Tryparedoxin peroxidase, putative
TcCLB.511419.40	Q4D193	1.95281	0.000802618	Phosphoglycerate kinase
TcCLB.505999.100	Q4DNV7	1.92707	0.000654252	Phosphoglycerate kinase
TcCLB.509505.10	Q4D004	1.89895	0.0203912	Protein disulfide isomerase, putative (Fragment)
TcCLB.511643.30	Q4DEI9	1.86086	0.023918	Aspartate carbamoyltransferase, putative
TcCLB.506211.70	Q4DYL1	1.85748	0.0195939	RNA-binding protein, putative
TcCLB.511383.50	Q4D8I7	1.84843	0.0122789	Prohibitin, putative
TcCLB.506485.80	Q4DAS0	1.83871	0.0155771	Oxidoreductase, putative
TcCLB.506577.54	Q4DR87	1.83643	0.014874	60S ribosomal protein L6
TcCLB.510091.80	Q4DB91	1.83056	0.0326139	Pyruvate dehydrogenase E1 beta subunit, putative
TcCLB.504425.60	Q4DFP0	1.79932	0.00196035	NADP-dependent alcohol hydrogenase, putative
TcCLB.506777.80	Q4DC68	1.78735	0.00823803	Seryl-tRNA synthetase, putative
TcCLB.511303.150	Q4DSK1	1.78126	0.0198062	Uncharacterized protein
TcCLB.508677.80	Q4DEF3	1.75981	0.0127243	NADP-dependent alcohol hydrogenase, putative
TcCLB.511737.10	Q4D5Z5	1.75284	0.0109162	Uncharacterized protein
TcCLB.505931.50	Q4CWE9	1.72822	0.0126248	Histone H3, putative
TcCLB.506953.49	Q4CZI4	1.66852	0.0102422	Glucose-6-phosphate 1-dehydrogenase, putative (Fragment)
TcCLB.506943.50	Q4DCN9	1.65607	0.0100452	Glyceraldehyde-3-phosphate dehydrogenase
TcCLB.511285.120	Q4DH96	1.64724	0.0156177	ATP-dependent RNA helicase, putative
TcCLB.511575.60	Q4DG65	1.64375	0.0219837	Isocitrate dehydrogenase [NADP]
TcCLB.511519.9	Q4CLR4	1.60764	0.0119528	Uncharacterized protein (Fragment)
TcCLB.507017.40	Q4DFE2	1.58852	0.0134431	2-hydroxy-3-oxopropionate reductase, putative
TcCLB.507091.50	Q4DGV1	1.58318	0.025106	Aspartate carbamoyltransferase, putative
TcCLB.508955.20	Q4CM92	1.58291	0.0247047	Uncharacterized protein
TcCLB.511025.110	Q4DD33	1.58191	0.0259591	Dihydrolipoyl dehydrogenase
TcCLB.510187.100	Q4E4E1	1.57543	0.0294603	Glucokinase 1, putative
TcCLB.503935.20	Q4CNP4	1.56711	0.0110622	2-oxoglutarate dehydrogenase, E2 component, dihydrolipoamide succinyltransferase, putative
TcCLB.511529.160	Q4DMX9	1.56436	0.0152135	3-hydroxyisobutyryl-CoA hydrolase, mitochondrial
TcCLB.506885.400	Q4E4G0	1.56415	0.0290975	40 kDa cyclophilin, putative
TcCLB.507241.30	Q4CWA5	1.55061	0.00413397	Arginine kinase, putative
TcCLB.508387.20	Q4DQ97	1.54891	0.01614	Purine nucleoside phosphorylase
TcCLB.506789.280	Q4DZW1	1.54436	0.01045	Purine nucleoside phosphorylase
TcCLB.509543.50	Q4CWK5	1.53546	0.0131879	DNAK protein, putative (Fragment)
TcCLB.504431.64	Q4D714	1.53426	0.0300222	High mobility group protein, putative
TcCLB.506025.60	Q4D1R9	1.51934	0.0208598	2-oxoglutarate dehydrogenase, E2 component, dihydrolipoamide succinyltransferase, putative
TcCLB.506213.120	Q4DC19	1.51858	0.0259607	ATP-dependent RNA helicase, putative
TcCLB.507089.270	Q4DWL8	1.50837	0.0305928	Dihydrolipoyl dehydrogenase
TcCLB.506247.230	Q4E132	1.49766	0.0347569	Prolyl oligopeptidase, putative
TcCLB.504163.50	Q4D4R9	1.47524	0.00161822	Fructose-bisphosphate aldolase
TcCLB.511209.10	Q4CXR7	1.47346	0.0106223	Vacuolar ATP synthase subunit B, putative
TcCLB.509059.50	Q4D946	1.47137	0.00385547	Pyridoxal kinase, putative
TcCLB.506247.50	Q4E151	1.42562	0.00312197	Chaperonin, putative
TcCLB.503555.30	Q4CT43	1.40888	0.0031511	Trypanothione reductase, putative
TcCLB.504153.160	Q4E2R7	1.39422	0.000628141	Carboxypeptidase, putative
TcCLB.510353.10	Q4CUM2	1.37116	0.00645062	Major vault protein
TcCLB.508479.340	Q4E2I6	1.36283	0.0175329	Succinate--CoA ligase [ADP-forming] subunit alpha, mitochondrial
TcCLB.511287.49	Q4DJ07	1.32599	0.00887374	Prostaglandin F synthase
TcCLB.504003.60	Q4D1L5	1.31963	0.0124391	T-complex protein 1 subunit gamma
TcCLB.506247.220	Q4E133	1.25731	0.00645254	Histidine ammonia-lyase
TcCLB.504045.110	Q4D9S6	-1.12942	0.000577186	Urocanate hydratase, putative
TcCLB.509683.130	Q4DLT0	-1.25093	0.00456307	Aminopeptidase, putative (Fragment)
TcCLB.503715.30	Q4CZR0	-1.34156	0.00259098	Small GTP-binding protein Rab1, putative
TcCLB.506263.30	Q4CU50	-1.35832	0.00231766	D-isomer specific 2-hydroxyacid dehydrogenase-protein, putative
TcCLB.504109.200	Q4DR27	-1.38415	0.0152707	Retrotransposon hot spot (RHS) protein, putative
TcCLB.505985.9	Q4CPQ6	-1.40082	0.0219724	Calpain cysteine peptidase, putative (Fragment)
TcCLB.511025.50	Q4DD39	-1.4317	0.0261605	Glucosamine-6-phosphate isomerase
TcCLB.411235.9	Q4CLA1	-1.44675	0.0113483	Tubulin alpha chain
TcCLB.507167.20	Q4DYW4	-1.46927	0.011894	Retrotransposon hot spot (RHS) protein, putative
TcCLB.511311.80	Q4DLD9	-1.57213	0.0261436	Uncharacterized protein (Fragment)
TcCLB.508323.100	Q4DFL2	-1.64809	0.0113663	I/6 autoantigen, putative
TcCLB.510215.10	Q4CMU8	-1.7169	0.0125117	NADH-dependent fumarate reductase, putative
TcCLB.508175.370	Q4E2W0	-1.73879	0.0288649	Glutamine synthetase, putative
TcCLB.509219.20	Q4CXQ1	-1.74541	0.000858033	Retrotransposon hot spot (RHS) protein, putative
TcCLB.509445.39	Q4CR18	-1.76696	0.0244046	Glutamate dehydrogenase, putative (Fragment)
TcCLB.507093.229	Q4E1N4	-1.77139	0.0247302	U-rich RNA-binding protein UBP-2
TcCLB.510983.19	Q4CT80	-1.7789	0.00977734	Retrotransposon hot spot (RHS) protein, putative
TcCLB.509717.20	Q4DMG9	-1.80168	0.00944322	Acetyltransferase component of pyruvate dehydrogenase complex
TcCLB.509247.50	Q4D6H2	-1.8226	0.030228	Methionyl-tRNA synthetase, putative
TcCLB.507501.10	Q4CX26	-1.82873	0.00974996	Retrotransposon hot spot (RHS) protein, putative
TcCLB.507711.200	Q4DZQ8	-1.84304	0.00947301	Uncharacterized protein
TcCLB.507167.240	Q4DYV8	-1.85383	0.0358096	Retrotransposon hot spot (RHS) protein, putative
TcCLB.511101.19	Q4CVW3	-1.86682	0.00710841	Retrotransposon hot spot (RHS) protein, putative
TcCLB.511049.40	Q4CTR0	-1.891	0.0222327	Leucyl-tRNA synthetase, putative
TcCLB.510247.10	Q4CRN7	-1.91973	0.035431	R27-2 protein, putative
TcCLB.506425.40	Q4DM53	-1.97106	0.0168677	Uncharacterized protein
TcCLB.510105.170	Q4DZT8	-1.98395	0.00543677	Acetyltransferase component of pyruvate dehydrogenase complex
TcCLB.506207.50	Q4CW52	-2.00704	0.0338979	IgE-dependent histamine-releasing factor, putative
TcCLB.507611.110	Q4E3H1	-2.02297	0.0144667	Retrotransposon hot spot (RHS) protein, putative
TcCLB.506167.50	Q4D5X2	-2.08172	0.0108306	Clathrin heavy chain
TcCLB.506925.120	Q4E4N4	-2.14991	0.0130598	Eukaryotic translation initiation factor 5A
TcCLB.507611.10	Q4E3H4	-2.15781	0.0315814	Retrotransposon hot spot (RHS) protein, putative
TcCLB.508231.20	Q4DW69	-2.1803	0.00280584	40S ribosomal protein S12
TcCLB.506491.20	Q4D1D3	-2.24927	0.0087853	Myosin heavy chain, putative (Fragment)
TcCLB.508325.60	Q4E0I5	-2.29691	0.00302142	Retrotransposon hot spot (RHS) protein, putative
TcCLB.504121.30	Q4CQW2	-2.31746	0.0298322	60S ribosomal protein L4, putative
TcCLB.508355.330	Q4E396	-2.37526	0.0373647	Uncharacterized protein
TcCLB.509797.40	Q4D2F2	-2.44357	0.010347	Isoleucyl-tRNA synthetase, putative
TcCLB.511277.160	Q4E5H8	-2.44812	0.0147787	Ribosomal protein
TcCLB.506963.10	Q4DB28	-2.76326	0.00776991	Ribosomal protein
TcCLB.504121.39	Q4CQW1	-2.85211	0.0171285	60S ribosomal protein L14, putative (Fragment)
TcCLB.509917.19	Q4CRM5	-2.90003	0.00176382	Retrotransposon hot spot (RHS) protein, putative (Fragment)
TcCLB.506721.30	Q4D6J0	-3.19089	0.016085	Calpain-like cysteine peptidase, putative
TcCLB.509585.10	Q4CX46	-3.43149	0.0251088	Dynein heavy chain, putative (Fragment)
TcCLB.508153.1050	Q4E5Z1	-3.5834	0.000471202	Uncharacterized protein
TcCLB.506593.30	Q4CUC7	-3.62651	0.00148575	Ribosomal protein S7, putative
TcCLB.509247.30	Q4D6H3	-5.06815	0.00173837	Uncharacterized protein
TcCLB.507933.10	Q4CVE1	-5.44371	0.0117813	Uncharacterized protein
TcCLB.510801.10	Q4CNG5	-5.81112	0.00193689	Calpain-like cysteine peptidase, putative (Fragment)
TcCLB.508971.50	Q4D7V1	-7.34371	0.00887589	Ubiquitin-protein ligase-like, putative
TcCLB.506357.130	Q4DY15	-9.79047	0.00626996	Uncharacterized protein
#These identifications satisfied the fold criteria but, most likely, this happened by chance (should be disconsidered).
TcCLB.505919.80	Q4D8B1	3.67032	0.0392896	Retrotransposon hot spot (RHS) protein, putative
TcCLB.511469.100	Q4DCI2	2.70678	0.0420291	2-oxoisovalerate dehydrogenase beta subunit, mitochondrial, putative
TcCLB.506559.200	Q4E5B1	2.67946	0.0506747	Thioredoxin, putative
TcCLB.511047.40	Q4D0C0	2.56027	0.0425819	NADH-cytochrome b5 reductase
TcCLB.506925.480	Q4E4K4	2.49979	0.140342	Ribokinase
TcCLB.509203.40	Q4D8L7	2.45069	0.137851	Glycosomal membrane protein, putative
TcCLB.511367.70	Q4DYI5	2.42848	0.0415659	Dihydrolipoamide acetyltransferase, putative
TcCLB.511237.110	Q4D7C3	2.40586	0.0516704	Peptidyl-prolyl cis-trans isomerase
TcCLB.510739.19	Q4CM88	2.36312	0.0555912	Cystathione gamma lyase, putative (Fragment)
TcCLB.509607.70	Q4DDT6	2.3535	0.106709	Serine/threonine protein kinase, putative
TcCLB.508357.100	Q4D6M9	2.29927	0.052745	Uncharacterized protein
TcCLB.511727.290	Q4DY30	2.24738	0.0386781	RNA-binding protein, putative
TcCLB.510759.80	Q4DS86	2.14767	0.195194	Uncharacterized protein
TcCLB.508595.50	Q4CTX9	2.14697	0.0545861	Cysteine peptidase, putative (Fragment)
TcCLB.511727.270	Q4DY32	2.1182	0.0546175	RNA-binding protein, putative
TcCLB.510165.10	Q4D930	2.11105	0.0562334	Heat shock protein DnaJ, putative (Fragment)
TcCLB.505997.60	Q4DWB1	2.04716	0.0444801	Retrotransposon hot spot (RHS) protein, putative
TcCLB.510429.50	Q4CSP8	1.99894	0.169422	p21 antigen protein, putative
TcCLB.504069.80	Q4DAV6	1.99188	0.0521695	ATP synthase F1 subunit gamma protein, putative
TcCLB.504217.10	Q4CP08	1.98876	0.0828503	Coatomer epsilon subunit, putative
TcCLB.508851.189	Q4DJB5	1.98124	0.0838771	Phosphoenolpyruvate mutase, putative
TcCLB.509331.74	Q4DQY2	1.97286	0.0427875	Uncharacterized protein
TcCLB.507165.50	Q4CST7	1.96477	0.209364	Cysteine synthase, putative
TcCLB.506221.50	Q4D8N0	1.95457	0.0816098	Coatomer epsilon subunit, putative
TcCLB.510431.250	Q4DXW9	1.93614	0.109959	Phosphoribosylpyrophosphate synthetase, putative
TcCLB.510285.60	Q4DIT2	1.93579	0.10822	2-methoxy-6-polyprenyl-1,4-benzoquinol methylase, mitochondrial
TcCLB.508209.140	Q4DFA6	1.92585	0.0643341	Protein disulfide isomerase, putative
TcCLB.506525.20	Q4DK31	1.92488	0.22134	Protein transport protein sec13, putative
TcCLB.511407.60	Q4D7V7	1.92437	0.075334	Small GTP-binding protein Rab11, putative
TcCLB.507769.30	Q4CNZ3	1.87109	0.185448	Uncharacterized protein
TcCLB.503823.160	Q4DLG3	1.86766	0.103092	2-methoxy-6-polyprenyl-1,4-benzoquinol methylase, mitochondrial
TcCLB.504203.40	Q4CX49	1.8659	0.0866962	Uncharacterized protein
TcCLB.509229.80	Q4DI18	1.86137	0.0952626	Mitochondrial processing peptidase alpha subunit, putative
TcCLB.511867.50	Q4DKR1	1.83282	0.200236	Proteasome endopeptidase complex
TcCLB.505983.20	Q4CVR4	1.82761	0.205921	Nucleosome assembly protein-like protein, putative
TcCLB.511277.170	Q4E5H7	1.80776	0.148925	ATP-dependent zinc metallopeptidase, putative
TcCLB.511589.140	Q4DNR3	1.80621	0.0883011	Phosphoenolpyruvate mutase, putative
TcCLB.510303.50	Q4DZ14	1.79677	0.0988773	Deoxyribose-phosphate aldolase, putative
TcCLB.509717.80	Q4DMG2	1.79027	0.0581055	Glyceraldehyde-3-phosphate dehydrogenase
TcCLB.508503.20	Q4D214	1.77955	0.0882665	Cytochrome c oxidase subunit V, putative
TcCLB.506857.20	Q4D9J8	1.77747	0.246697	Pyrroline-5-carboxylate reductase
TcCLB.511163.10	Q4CW46	1.76553	0.0586841	Seryl-tRNA synthetase, putative (Fragment)
TcCLB.507765.70	Q4DFU5	1.74301	0.0738191	40S ribosomal protein S21, putative
TcCLB.509153.90	Q4DLS1	1.73274	0.0421703	Bifunctional dihydrofolate reductase-thymidylate synthase
TcCLB.510335.10	Q4CWE8	1.72293	0.233285	Uncharacterized protein
TcCLB.510121.70	Q4DQ22	1.71082	0.164981	Uncharacterized protein
TcCLB.503891.100	Q4CU77	1.70823	0.171048	Proteasome beta 2 subunit, putative
TcCLB.510669.20	Q4CR48	1.70459	0.0561975	Gim5A protein, putative
TcCLB.509207.90	Q4DH60	1.70335	0.212459	Pyrroline-5-carboxylate reductase
TcCLB.504013.100	Q4D6N9	1.6946	0.0414457	Ribosomal protein S19, putative
TcCLB.507673.20	Q4CVX1	1.69117	0.0853022	60S ribosomal protein L13a, putative
TcCLB.503841.10	Q4D086	1.68431	0.0455374	Proteasome activator protein PA26, putative (Fragment)
TcCLB.510573.10	Q4CLA9	1.67491	0.057353	Actin, putative (Fragment)
TcCLB.510105.230	Q4DZT1	1.65967	0.0552394	Glyceraldehyde-3-phosphate dehydrogenase
TcCLB.511367.290	Q4DYG6	1.65591	0.238533	Uncharacterized protein
TcCLB.511731.10	Q4D7G6	1.65543	0.0856213	UV excision repair RAD23-like protein, putative
TcCLB.506195.80	Q4DXL7	1.65495	0.20638	Adenylate kinase, putative
TcCLB.507625.99	Q4DPE6	1.64078	0.168981	Gamma-glutamylcysteine synthetase, putative
TcCLB.506985.30	Q4D144	1.64057	0.170335	Proteasome subunit alpha type
TcCLB.511761.60	Q4D8E8	1.63411	0.0590921	Uncharacterized protein
TcCLB.509859.40	Q4D4Y0	1.63034	0.162767	Cytosolic leucyl aminopeptidase, putative
TcCLB.511145.43	Q4D1H4	1.62752	0.133945	Proteasome subunit alpha type
TcCLB.508153.130	Q4E679	1.61069	0.0755497	Enoyl-CoA hydratase, mitochondrial, putative
TcCLB.508185.10	Q4CKX1	1.60082	0.149696	Enoyl-CoA hydratase, mitochondrial, putative
TcCLB.508277.160	Q4E0Y0	1.59411	0.138231	Glutaminyl-tRNA synthetase, putative
TcCLB.506625.240	Q4DUB8	1.55681	0.0731928	Uncharacterized protein
TcCLB.510889.50	Q4E2P2	1.5329	0.0685609	Cytochrome C oxidase subunit IV, putative
TcCLB.509671.80	Q4CU61	1.53234	0.0695145	60S ribosomal protein L5, putative
TcCLB.503687.40	Q4CVB5	1.52303	0.0617562	40 kDa cyclophilin, putative
TcCLB.511281.40	Q4D9Z9	1.52301	0.0771003	Diphosphomevalonate decarboxylase
GMPR	Q4E1M2	1.50559	0.0439271	GMP reductase
TcCLB.510821.50	Q4CZG6	1.493	0.0388391	Replication Factor A 28 kDa subunit, putative
TcCLB.508601.119	Q4DBP9	-1.49695	0.060492	Ribose 5-phosphate isomerase, putative
TcCLB.510579.70	Q4D9L7	-1.50814	0.0388773	Nascent polypeptide associated complex subunit, putative
TcCLB.509223.20	Q4DD64	-1.52313	0.0578827	Retrotransposon hot spot (RHS) protein, putative
TcCLB.459199.10	Q4CQ60	-1.53871	0.0668717	Retrotransposon hot spot (RHS) protein, putative
TcCLB.511907.50	Q4DY82	-1.55753	0.0741136	Lysophospholipase, putative
TcCLB.508535.10	Q4CYX1	-1.55825	0.0992441	NADH-dependent fumarate reductase, putative
TcCLB.510877.40	Q4DPV6	-1.56336	0.0524813	Uncharacterized protein
TcCLB.507993.150	Q4E1W3	-1.56541	0.111471	Uncharacterized protein
TcCLB.507927.60	Q4D586	-1.57089	0.0505031	Uncharacterized protein
TcCLB.510877.30	Q4DPV7	-1.58071	0.046854	Uncharacterized protein
TcCLB.463155.20	Q4CU66	-1.60551	0.050793	Retrotransposon hot spot (RHS) protein, putative
TcCLB.506825.200	Q4DZE3	-1.63743	0.172933	Uncharacterized protein
TcCLB.510463.190	Q4DZ47	-1.64176	0.167028	Retrotransposon hot spot (RHS) protein, putative
TcCLB.507603.200	Q4DW08	-1.6442	0.126806	Proteasome regulatory ATPase subunit 3, putative
TcCLB.511211.20	Q4DTP4	-1.64859	0.143525	Coatomer gamma subunit, putative
TcCLB.503453.40	Q4D8K3	-1.65435	0.14214	60S ribosomal protein L30, putative
TcCLB.509831.33	Q4D0R5	-1.6631	0.104243	Uncharacterized protein
TcCLB.510821.60	Q4CZG5	-1.66705	0.115675	Ribonucleoprotein p18, mitochondrial, putative
TcCLB.509747.20	Q4DD81	-1.67251	0.0646541	60S ribosomal protein L22, putative
TcCLB.509583.4	Q4CPG4	-1.67292	0.19842	60S ribosomal protein L44, putative (Fragment)
TcCLB.509965.110	Q4E0V0	-1.69691	0.0776543	Importin subunit alpha
TcCLB.507031.90	Q4DSA0	-1.69731	0.154811	Arginase, putative
TcCLB.505763.19	Q4CQ52	-1.69816	0.0666827	Plasma membrane ATPase (Fragment)
TcCLB.509003.30	Q4CW64	-1.69972	0.0509073	Calpain-like cysteine peptidase, putative
TcCLB.506845.60	Q4D0T5	-1.69994	0.0943451	Retrotransposon hot spot (RHS) protein, putative
TcCLB.511301.170	Q4DM77	-1.70357	0.123222	Retrotransposon hot spot (RHS) protein, putative
TcCLB.508461.490	Q4E4R0	-1.70918	0.0657716	60S ribosomal protein L23, putative
TcCLB.509761.10	Q4CP43	-1.71078	0.149764	Uncharacterized protein (Fragment)
TcCLB.510301.80	Q4D0P4	-1.7177	0.0415749	N-acetyltransferase subunit Nat1, putative
TcCLB.504427.250	Q4DYM1	-1.721	0.10633	Ubiquitin-activating enzyme E1, putative
TcCLB.510479.11	Q4CN13	-1.7215	0.179653	Retrotransposon hot spot (RHS) protein, putative (Fragment)
TcCLB.510337.20	Q4CXJ8	-1.73567	0.0987254	Calpain-like cysteine peptidase, putative
TcCLB.510741.180	Q4DRK9	-1.74222	0.0607142	ATP-dependent RNA helicase, putative
TcCLB.506303.80	Q4DN44	-1.74232	0.16105	Uncharacterized protein
TcCLB.506931.10	Q4D2M6	-1.74387	0.108279	Haloacid dehalogenase-like hydrolase, putative
TcCLB.508827.139	Q4DK33	-1.76154	0.149242	Coatomer gamma subunit, putative (Fragment)
TcCLB.508741.300	Q4E342	-1.76246	0.130536	Proteasome regulatory non-ATPase subunit 6, putative
TcCLB.508265.100	Q4D770	-1.76337	0.0789506	Uncharacterized protein
TcCLB.511391.200	Q4DU56	-1.76362	0.156813	Pitrilysin-like metalloprotease, putative
TcCLB.507061.30	Q4D9I5	-1.76421	0.21877	Superoxide dismutase
TcCLB.506441.20	Q4CSI2	-1.76606	0.0651443	Uncharacterized protein
TcCLB.507447.19	Q4CMT2	-1.78451	0.0964881	Microtubule-associated protein, putative (Fragment)
TcCLB.508675.29	Q4D066	-1.79073	0.120309	Calpain-like cysteine peptidase, putative
TcCLB.510003.20	Q4D3R4	-1.79659	0.184902	Uncharacterized protein
TcCLB.507253.10	Q4CYJ8	-1.8008	0.0669175	Retrotransposon hot spot (RHS) protein, putative
TcCLB.504069.10	Q4DAW6	-1.80972	0.162413	Proteasome subunit alpha type
TcCLB.510661.90	Q4DUI3	-1.82193	0.06926	ATP-dependent RNA helicase, putative
TcCLB.510165.110	Q4D923	-1.83112	0.107773	Retrotransposon hot spot (RHS) protein, putative
TcCLB.504147.200	Q4DZM5	-1.83576	0.0605308	Proteasome regulatory ATPase subunit, putative
TcCLB.511371.10	Q4CUE7	-1.83581	0.0736419	Retrotransposon hot spot (RHS) protein, putative
TcCLB.507047.110	Q4DPS6	-1.84307	0.138313	Otubain, putative
TcCLB.506625.60	Q4DUD6	-1.84598	0.0988467	Inositol 5-phosphatase 1, putative
TcCLB.511487.30	Q4DS00	-1.85133	0.174363	Dispersed gene family protein 1 (DGF-1), putative
TcCLB.507675.10	Q4CU84	-1.85383	0.0751905	Uncharacterized protein (Fragment)
TcCLB.507891.29	Q4CTX2	-1.86349	0.102244	Flagellar calcium-binding protein, putative
TcCLB.510737.70	Q4D2V8	-1.86879	0.210081	60S ribosomal subunit protein L31, putative
TcCLB.506507.10	Q4CZT5	-1.87488	0.104455	N-acetylglucosamine-6-phosphate deacetylase-like protein, putative (Fragment)
TcCLB.510543.90	Q4DQ78	-1.87673	0.0730781	Retrotransposon hot spot (RHS) protein, putative
TcCLB.506677.10	Q4CPK3	-1.87783	0.129882	Ubiquitin-like protein, putative
TcCLB.511131.80	Q4DA60	-1.89106	0.189536	Uncharacterized protein
TcCLB.510743.10	Q4D7C0	-1.89509	0.118564	Ubiquitin-activating enzyme E1, putative (Fragment)
TcCLB.511727.140	Q4DY45	-1.93245	0.10495	Phenylalanyl-tRNA synthetase alpha chain, putative
TcCLB.504103.20	Q4DBX3	-1.94641	0.0717179	Uncharacterized protein
TcCLB.510307.220	Q4E0N0	-1.94994	0.0956114	Retrotransposon hot spot (RHS) protein, putative
TcCLB.504001.20	Q4CW22	-1.95126	0.0661218	Uncharacterized protein
TcCLB.506755.260	Q4DWJ0	-1.9573	0.0748572	Mitochondrial RNA-binding protein 2, putative
TcCLB.511815.60	Q4DJ99	-1.95902	0.101455	Prefoldin, putative
TcCLB.503989.10	Q4D7N5	-1.97708	0.108548	Zinc finger protein 2, putative
TcCLB.509395.100	Q4DJQ7	-1.97816	0.0935564	Cytochrome b-domain protein, putative
TcCLB.504057.40	Q4DSF3	-1.98186	0.123095	Uncharacterized protein
TcCLB.507053.170	Q4DTI8	-1.98603	0.198213	Uncharacterized protein
TcCLB.506513.110	Q4DPI6	-2.00866	0.0955476	Peptidase T, putative
TcCLB.506743.4	Q4DPQ3	-2.05269	0.120165	Eukaryotic translation initiation factor 1A, putative (Fragment)
TcCLB.509903.5	Q4CZV4	-2.05797	0.0395283	Retrotransposon hot spot (RHS) protein, putative (Fragment)
TcCLB.504199.20	Q4CVJ1	-2.06816	0.159834	Uncharacterized protein
TcCLB.507669.170	Q4DRV4	-2.07122	0.0992186	Guanine nucleotide-binding protein beta subunit-like protein, putative
TcCLB.508815.110	Q4DMJ3	-2.07488	0.161057	Serine/threonine-protein phosphatase
TcCLB.510145.20	Q4CVE9	-2.08267	0.0464478	Cofilin/actin depolymerizing factor, putative
TcCLB.511647.4	Q4D6X8	-2.09208	0.125367	Glutamine-dependent carbamoyl-phosphate synthetase, putative (Fragment)
TcCLB.509843.10	Q4CYS6	-2.12287	0.155087	Retrotransposon hot spot (RHS) protein, putative (Fragment)
TcCLB.511545.40	Q4DMS7	-2.12823	0.0413907	Ribosomal protein L27, putative
TcCLB.511809.130	Q4DGZ5	-2.15836	0.0459758	40S ribosomal protein S15, putative
TcCLB.508533.10	Q4D4Y8	-2.17866	0.0411995	Uncharacterized protein (Fragment)
TcCLB.511733.100	Q4D6Q5	-2.19685	0.103703	Uncharacterized protein
TcCLB.507225.10	Q4CPT5	-2.22387	0.0604803	Retrotransposon hot spot (RHS) protein, putative
TcCLB.510823.70	Q4D991	-2.25197	0.0467934	60S acidic ribosomal protein, putative
TcCLB.510337.30	Q4CXJ7	-2.26106	0.0569371	Adenylosuccinate lyase
TcCLB.506933.20	Q4DCB6	-2.34658	0.0966757	Ribonucleoside-diphosphate reductase
TcCLB.509895.10	Q4DCY3	-2.37112	0.0963049	Uncharacterized protein
TcCLB.506855.310	Q4E1R5	-2.37422	0.105278	Uncharacterized protein
TcCLB.508041.60	Q4CXW9	-2.38283	0.101696	Eukaryotic release factor 3, putative
TcCLB.510797.10	Q4CYI3	-2.39578	0.0837476	2-oxoglutarate dehydrogenase subunit, putative
TcCLB.506859.90	Q4DVG6	-2.40356	0.0536079	Prefoldin, putative
TcCLB.508277.120	Q4CQQ9	-2.46767	0.0909864	Ribosomal protein S6, putative
TcCLB.506885.320	Q4E4H1	-2.47781	0.10803	Uncharacterized protein
TcCLB.506591.20	Q4D7U8	-2.48571	0.0591816	U-box domain protein, putative
TcCLB.509775.40	Q4DCQ3	-2.4878	0.129808	Superoxide dismutase
TcCLB.508649.20	Q4CY89	-2.49512	0.0457767	Uncharacterized protein
TcCLB.509013.19	Q4CW01	-2.50749	0.100551	Calpain-like cysteine peptidase, putative (Fragment)
TcCLB.511407.10	Q4D7W2	-2.58306	0.137011	Nuclear transport factor 2, putative
TcCLB.504257.70	Q4CWP8	-2.7223	0.0441133	Valyl-tRNA synthetase, putative (Fragment)
TcCLB.511217.140	Q4DVC7	-2.73065	0.0509312	Coatomer subunit delta
TcCLB.508543.90	Q4DSJ2	-2.78672	0.050167	Calcium-transporting ATPase
TcCLB.445281.9	Q4CKH9	-2.80089	0.0868178	Calpain-like cysteine peptidase, putative (Fragment)
TcCLB.511649.70	Q4DL10	-2.80267	0.0489133	Structural maintenance of chromosomes protein
TcCLB.506777.110	Q4DC65	-2.83525	0.0556925	Uncharacterized protein
TcCLB.507809.110	Q4DSS0	-2.96389	0.0373334	Uncharacterized protein
TcCLB.510317.7	Q4CY57	-3.0086	0.0720373	Uncharacterized protein (Fragment)
TcCLB.506123.40	Q4CYD2	-3.02048	0.0641665	Nucleolar RNA helicase II, putative
TcCLB.507005.60	Q4D2P9	-3.15996	0.0448798	Structural maintenance of chromosomes protein
TcCLB.506857.90	Q4D9J1	-3.19654	0.0425065	Proteasome regulatory ATPase subunit 1, putative
TcCLB.506563.30	Q4DQP3	-3.53383	0.03905	Coatomer subunit beta
TcCLB.508153.460	Q4E644	-3.58777	0.037292	Uncharacterized protein
TcCLB.507681.150	Q4DW38	-3.60372	0.0429227	40S ribosomal protein S24
TcCLB.508457.30	Q4CS26	-3.91158	0.0566108	Glycine cleavage system H protein, putative
TcCLB.508369.50	Q4CWB3	-4.6764	0.0670434	Acetyl-CoA carboxylase, putative (Fragment)
#These identifications did not meet the fold and p-value criteria. (should be disconsidered)
TcCLB.507541.40	Q4CSN9	1.63152	0.237673	Casein kinase, putative
TcCLB.509553.40	Q4D0A9	1.58724	0.263224	Ribonuclease mar1, putative
TcCLB.508873.399	Q4E503	1.58234	0.258549	Elongation factor 1-gamma (EF-1-gamma), putative
TcCLB.503733.70	Q4DA33	1.57887	0.164089	Phosphoacetylglucosamine mutase, putative
TcCLB.509769.80	Q4DKU5	1.57583	0.147606	Uncharacterized protein
TcCLB.508899.54	Q4DMP7	1.55992	0.152312	Uncharacterized protein
TcCLB.510751.40	Q4CSP3	1.54967	0.261839	Uncharacterized protein (Fragment)
TcCLB.508637.150	Q4DLI2	1.52983	0.14872	Ribonuclease L inhibitor, putative
TcCLB.508577.140	Q4DPB9	1.52539	0.271742	Peptidyl-prolyl cis-trans isomerase
TcCLB.509153.120	Q4DLR8	1.50176	0.291551	Acyl-CoA dehydrogenase, putative
pfk	Q4E657	1.50114	0.179652	ATP-dependent 6-phosphofructokinase
TcCLB.508173.129	Q4DV73	1.49325	0.271756	Uncharacterized protein
TcCLB.506945.20	Q4DX96	1.47524	0.170457	Phosphoglycerate kinase
TcCLB.508851.59	Q4DJC9	1.46782	0.114599	ATP synthase, putative
TcCLB.508153.20	Q4E689	1.46722	0.228774	Dynamin, putative
TcCLB.510687.120	Q4D9X5	1.46678	0.294144	H/ACA ribonucleoprotein complex subunit
TcCLB.508351.10	Q4CUP1	1.45629	0.0892809	Fructose-1,6-bisphosphatase, cytosolic, putative
TcCLB.507923.10	Q4CU39	1.45263	0.0506569	L-threonine 3-dehydrogenase, putative
TcCLB.510755.89	Q4D7Y4	1.44771	0.102248	Kinetoplastid membrane protein KMP-11, putative
TcCLB.506727.100	Q4DAM7	1.44708	0.0880421	3-hydroxyisobutyryl-CoA hydrolase, mitochondrial
TcCLB.511573.58	Q4CU30	1.44523	0.125097	Nucleolar protein, putative (Fragment)
TcCLB.504213.120	Q4DIK4	1.44377	0.187705	Proteasome subunit alpha type
TcCLB.508649.5	Q4CY92	1.43867	0.15354	Tryparedoxin peroxidase, putative (Fragment)
TcCLB.509051.40	Q4CVK9	1.4372	0.149313	Adenosine kinase, putative
TcCLB.508197.10	Q4CNF4	1.4325	0.0647808	60S ribosomal protein L11, putative
TcCLB.506529.360	Q4E5P5	1.43064	0.0978093	Cytochrome C oxidase subunit IV, putative
TcCLB.510755.120	Q4D7Y1	1.42665	0.110044	RNA-binding protein, putative
TcCLB.505989.82	Q4D5M2	1.41976	0.0878124	RuvB-like helicase
TcCLB.509381.20	Q4CP93	1.41935	0.212354	40S ribosomal protein S15a, putative
TcCLB.510181.9	Q4DDJ2	1.41916	0.120315	Myo-inositol-1-phosphate synthase, putative (Fragment)
TcCLB.506833.60	Q4CYX4	1.4185	0.0771387	UV excision repair RAD23-like protein, putative
TcCLB.510761.14	Q4DG45	1.41741	0.157755	60S ribosomal protein L26, putative
TcCLB.509265.10	Q4DGT4	1.4159	0.313525	Retrotransposon hot spot (RHS) protein, putative
TcCLB.508919.140	Q4DL69	1.4089	0.206331	Uncharacterized protein
TcCLB.507049.60	Q4DPX8	1.40879	0.244207	NAD(P)-dependent oxidoreductase, putative
TcCLB.508277.230	Q4E0X3	1.40635	0.0764677	Nucleolar RNA binding protein, putative
TcCLB.510765.70	Q4CU60	1.40363	0.0762967	60S ribosomal protein L5, putative
TcCLB.511815.180	Q4DJ91	1.40349	0.0498351	Uncharacterized protein
TcCLB.508647.200	Q4DV43	1.40096	0.117339	Triosephosphate isomerase
TcCLB.511289.30	Q4DD17	1.39995	0.0345466	Aminopeptidase, putative
TcCLB.508347.159	Q4DSW8	1.39786	0.355144	Mitotubule-associated protein Gb4, putative (Fragment)
TcCLB.508707.160	Q4E261	1.39489	0.308844	Uncharacterized protein
TcCLB.509627.30	Q4CYA0	1.39195	0.330788	Proteasome regulatory non-ATPase subunit 11, putative
TcCLB.511465.10	Q4CPR5	1.3901	0.122654	Proteasome activator protein PA26, putative
TcCLB.511365.70	Q4D9Z1	1.38948	0.15658	Proteasome regulatory non-ATPase subunit, putative
TcCLB.503589.10	Q4CMK4	1.38918	0.236952	Mannose-1-phosphate guanyltransferase, putative
TcCLB.503855.20	Q4DBH6	1.38905	0.094779	Spermidine synthase, putative
TcCLB.508173.40	Q4DV84	1.3861	0.0809394	Mercaptopyruvate sulfurtransferase, putative
TcCLB.509583.10	Q4CPG3	1.38123	0.0912505	Chaperonin TCP20, putative
TcCLB.506297.150	Q4E0Q3	1.37977	0.0932985	40S ribosomal protein S5, putative
TcCLB.508319.40	Q4D0U9	1.37924	0.072642	RNA helicase, putative
TcCLB.503479.30	Q4D6Z4	1.37407	0.221377	Adenylate kinase, putative
TcCLB.509937.150	Q4DSP9	1.37399	0.319483	Serine hydroxymethyltransferase
TcCLB.503419.30	Q4CZ29	1.36504	0.060252	Thiol-dependent reductase 1, putative
TcCLB.503689.4	Q4CV38	1.36503	0.0493576	Rab1 small GTP-binding protein, putative
TcCLB.511283.290	Q4E2T2	1.36389	0.34089	Uncharacterized protein
TcCLB.506213.80	Q4DC23	1.36359	0.284829	60S ribosomal protein L17, putative
TcCLB.507943.5	Q4CXR1	1.35888	0.105238	Histone H4 (Fragment)
TcCLB.507941.150	Q4DEL1	1.3571	0.10707	Histone H4
TcCLB.506563.210	Q4DQN5	1.35691	0.114095	Calpain-like cysteine peptidase, putative
TcCLB.510677.9	Q4CVJ4	1.35158	0.318253	Dispersed gene family protein 1 (DGF-1), putative (Fragment)
TcCLB.510571.30	Q4CYQ8	1.34922	0.0780222	Actin, putative
TcCLB.507547.30	Q4D8W3	1.34594	0.198234	Mitochondrial processing peptidase alpha subunit, putative
TcCLB.504105.150	Q4DZ97	1.34404	0.137936	Importin beta-1 subunit, putative
TcCLB.506127.110	Q4DP89	1.34226	0.186206	Eukaryotic peptide chain release factor subunit 1, putative
TcCLB.507063.90	Q4E024	1.33822	0.024067	Mitochondrial DNA polymerase beta, putative
TcCLB.510183.20	Q4CX66	1.33768	0.317127	Dipeptidyl-peptidase 8-like serine peptidase, putative
PA45-B	Q868H8	1.3376	0.0727996	Proline racemase B
TcCLB.510353.30	Q4CUM0	1.33753	0.33667	Paraflagellar rod component Par4, putative
TcCLB.508731.60	Q4CWX1	1.33623	0.0450929	Adenylosuccinate synthetase 2
TcCLB.503841.70	Q4D080	1.33253	0.308754	Aspartate aminotransferase
TcCLB.509683.117	Q4D5P4	1.33018	0.0378859	40S ribosomal protein S4
TcCLB.508895.60	Q4DCC6	1.3243	0.09132	RNA-binding protein, putative
TcCLB.506189.10	Q4CNK1	1.32424	0.192483	Nucleolar protein, putative (Fragment)
TcCLB.506211.60	Q4DYL2	1.32262	0.0753891	RNA-binding protein, putative
TcCLB.508741.140	Q4CVT7	1.3225	0.159233	Imidazolonepropionase, putative
TcCLB.504741.240	Q4DTS0	1.32207	0.337981	Uncharacterized protein
TcCLB.509167.80	Q4DQQ9	1.32123	0.317155	Uncharacterized protein
TcCLB.504069.53	Q4DAW0	1.31917	0.231606	Proteasome subunit alpha type
TcCLB.413977.10	Q4CKW4	1.31761	0.142855	Uncharacterized protein (Fragment)
TcCLB.508827.40	Q4DK44	1.3168	0.171352	Acyl-CoA dehydrogenase, putative
TcCLB.510997.40	Q4CWM5	1.30738	0.155991	Enoyl-CoA hydratase/isomerase family protein, putative
TcCLB.509569.100	Q4DKS7	1.30323	0.0898464	Nucleoside phosphorylase, putative
TcCLB.509011.40	Q4DDX3	1.3014	0.350181	Calreticulin, putative
TcCLB.511239.110	Q4DJ35	1.29364	0.0493122	Uncharacterized protein
TcCLB.510777.20	Q4CNC1	1.29178	0.0433925	Aspartyl-tRNA synthetase, putative
TcCLB.510187.20	Q4E4E9	1.29057	0.0632908	Tyrosine aminotransferase, putative
TcCLB.511815.170	Q4DJ92	1.29018	0.0922374	Uncharacterized protein
TcCLB.508625.10	Q4DBS3	1.2863	0.028946	Elongation factor 2, putative (Fragment)
TcCLB.511257.10	Q4DGL0	1.28582	0.0439278	DNAK protein, putative (Fragment)
TcCLB.509161.60	Q4DBB6	1.28381	0.325131	Uncharacterized protein
TcCLB.508355.320	Q4E397	1.27554	0.230473	Arginyl-tRNA synthetase, putative
TcCLB.507835.70	Q4DDX7	1.27533	0.360712	Dispersed gene family protein 1 (DGF-1), putative
TcCLB.507709.50	Q4DIV9	1.27488	0.0403561	60S ribosomal protein L6, putative
TcCLB.511635.10	Q4CTD8	1.2694	0.134909	Histone H2B
TcCLB.506401.320	Q4E3R2	1.26769	0.281915	60S ribosomal protein L7a, putative
TcCLB.511367.60	Q4DYI6	1.26442	0.316647	LA RNA binding protein, putative
TcCLB.508299.60	Q4D5K2	1.26424	0.0423479	60S ribosomal protein L2, putative
TcCLB.510187.70	Q4E4E4	1.26321	0.197672	Tyrosine aminotransferase, putative
TcCLB.506297.220	Q4E0P7	1.26123	0.150908	Uncharacterized protein
TcCLB.511717.90	Q4DJV2	1.25999	0.336087	Mannose-6-phosphate isomerase
TcCLB.508321.21	Q4CYH8	1.25591	0.114516	Histone H2A
TcCLB.509401.30	Q4CMU6	1.2539	0.273278	Cysteine peptidase, putative
TcCLB.506211.160	Q4DYK2	1.25039	0.192563	ADP,ATP carrier protein 1, mitochondrial, putative
TcCLB.507793.20	Q4CS97	1.24636	0.370854	Cysteine synthase, putative
TcCLB.506357.40	Q4DY24	1.24148	0.268023	Elongation factor TU, putative
TcCLB.506959.30	Q4DIE1	1.24013	0.00982547	ATP-dependent DEAD/H RNA helicase, putative
TcCLB.506925.319	Q4E4L7	1.23936	0.00743697	Isocitrate dehydrogenase [NADP]
TcCLB.511281.60	Q4D9Z4	1.23868	0.0926816	Pyruvate kinase
TcCLB.511815.40	Q4DJA1	1.23854	0.204356	Uncharacterized protein
TcCLB.507913.30	Q4CQ46	1.23617	0.0249493	Proliferating cell nuclear antigen
TcCLB.509063.30	Q4CPH5	1.23583	0.368266	Chaperonin HSP60/CNP60, putative (Fragment)
TcCLB.506975.40	Q4DGW6	1.23565	0.201566	Aminoacylase, putative
TcCLB.509875.204	Q4E0C2	1.23444	0.286466	Uncharacterized protein
TcCLB.510879.50	Q4DJX8	1.23263	0.0781181	Regulatory subunit of protein kinase a-like protein, putative
TcCLB.510121.20	Q4DQ27	1.23126	0.182685	Phosphotransferase
TcCLB.506859.20	Q4DVH1	1.22789	0.192459	Proteasome regulatory ATPase subunit 5, putative
TcCLB.510835.40	Q4D531	1.22776	0.300025	60S ribosomal protein L7a, putative
TcCLB.508071.90	Q4D5F9	1.22752	0.231961	Retrotransposon hot spot (RHS) protein, putative (Fragment)
TcCLB.506893.100	Q4D0C9	1.22749	0.200205	Uncharacterized protein
TcCLB.509429.320	Q4E0J7	1.22632	0.214122	Cysteine peptidase, putative
TcCLB.507831.70	Q4DI66	1.22049	0.210397	Pyruvate dehydrogenase E1 component subunit alpha
TcCLB.511903.110	Q4DU83	1.21883	0.293164	40S ribosomal protein S8
TcCLB.504153.360	Q4E2P8	1.21696	0.182634	Succinyl-CoA:3-ketoacid-coenzyme A transferase
TcCLB.507771.70	Q4DCL6	1.21639	0.379527	Uncharacterized protein
TcCLB.509801.30	Q4CVJ5	1.21403	0.133233	Citrate synthase
TcCLB.511725.250	Q4DWG6	1.21355	0.0719776	Chaperonin containing T-complex protein, putative
TcCLB.509649.30	Q4CYA6	1.21295	0.364428	Proteasome regulatory non-ATPase subunit 8, putative
TcCLB.511803.40	Q4D015	1.21108	0.321258	Uncharacterized protein
TcCLB.511277.110	Q4E5I4	1.20832	0.103774	Citrate synthase
TcCLB.506925.300	Q4E4L9	1.20387	0.142496	Peptidyl-prolyl cis-trans isomerase
TcCLB.511277.70	Q4E5I8	1.20174	0.182953	Elongation factor TU, putative
TcCLB.509105.70	Q4DKI7	1.20012	0.196817	Thiol-dependent reductase 1, putative
TcCLB.509695.170	Q4CVX9	1.19937	0.154589	60S ribosomal protein L9, putative
TcCLB.504013.60	Q4D6P2	1.1985	0.121403	Regulatory subunit of protein kinase a-like protein, putative
TcCLB.508851.180	Q4DJB6	1.19617	0.0544648	14-3-3 protein, putative
TcCLB.506775.80	Q4DRH6	1.192	0.198763	14-3-3 protein, putative
TcCLB.506649.80	Q4DE30	1.19087	0.183188	RNA-binding protein, putative
TcCLB.508461.550	Q4E4Q4	1.19077	0.161562	Uncharacterized protein
TcCLB.508111.30	Q4D5C2	1.19023	0.0523699	Glutamate dehydrogenase
TcCLB.504105.140	Q4DZ98	1.19012	0.123415	Enolase, putative
TcCLB.510517.10	Q4DDF3	1.19001	0.149396	Chaperonin/T-complex protein 1 gamma subunit, putative (Fragment)
TcCLB.503939.80	Q4DLK5	1.18992	0.326794	Prolyl-tRNA synthetase, putative
TcCLB.508547.30	Q4DRG3	1.1898	0.384795	Acyl-CoA dehydrogenase, mitochondrial, putative
TcCLB.508357.90	Q4D6N0	1.18909	0.221212	T-complex protein 1, beta subunit, putative
TcCLB.506421.10	Q4CLI9	1.18754	0.262629	Retrotransposon hot spot (RHS) protein, putative (Fragment)
TcCLB.506835.30	Q4DGQ2	1.18704	0.12095	60S ribosomal protein L9, putative
TcCLB.503419.50	Q4CZ27	1.18686	0.40467	RNA-binding protein RGGm, putative
TcCLB.511801.60	Q4D7H6	1.18653	0.261681	Mitochondrial DEAD box protein, putative
TcCLB.507875.20	Q4DWV8	1.18511	0.0706108	Glutamate dehydrogenase
TcCLB.508739.60	Q4CMF1	1.18373	0.272318	Histone H4
TcCLB.508693.50	Q4DTV8	1.1818	0.0732143	Uncharacterized protein
TcCLB.511277.60	Q4E5I9	1.18125	0.193229	Alcohol dehydrogenase, putative
TcCLB.506811.160	Q4DV01	1.18007	0.416337	R27-2 protein, putative
TcCLB.508461.500	Q4E4Q8	1.17869	0.358265	60S ribosomal protein L27A/L29, putative
TcCLB.506789.160	Q4DZX3	1.17702	0.402222	Uncharacterized protein
TcCLB.508799.240	Q4DZJ3	1.17587	0.206331	Aminopeptidase, putative
TcCLB.510507.20	Q4D7M6	1.17396	0.107688	3-ketoacyl-CoA thiolase, putative
TcCLB.509057.20	Q4CNH7	1.1728	0.379765	Importin subunit alpha
TcCLB.507031.29	Q4DSA7	1.17167	0.245761	Nucleosome assembly protein, putative
TcCLB.508821.40	Q4CXI6	1.1673	0.250078	Uncharacterized protein
TcCLB.510339.50	Q4DA73	1.16525	0.118121	Spermidine synthase, putative
TcCLB.507889.10	Q4CMZ5	1.16418	0.104456	Transaldolase
TcCLB.509611.20	Q4DKA4	1.16329	0.374834	Peptidyl-prolyl cis-trans isomerase
TcCLB.506629.200	Q4DQC4	1.15989	0.182006	Uncharacterized protein
TcCLB.506925.150	Q4E4N2	1.15955	0.234671	Protein phosphatase, putative
TcCLB.503815.10	Q4CRU8	1.15798	0.186583	Alkyl-dihydroxyacetone phosphate synthase, putative
TcCLB.511627.110	Q4D832	1.15662	0.213862	Heat shock protein DnaJ, putative
TcCLB.510855.10	Q4CSX7	1.15651	0.416266	Peptide methionine sulfoxide reductase, putative
TcCLB.508807.10	Q4CLP1	1.15494	0.330078	ATP-dependent Clp protease subunit, heat shock protein 100, putative (Fragment)
TcCLB.509237.130	Q4DJS7	1.15426	0.0562127	Cytoskeleton-associated protein CAP5.5, putative
TcCLB.508971.30	Q4D7V3	1.15332	0.339011	Lysine--tRNA ligase
TcCLB.510299.10	Q4CZK7	1.15293	0.375638	Uncharacterized protein
TcCLB.511319.20	Q4CU87	1.15184	0.422565	Uncharacterized protein
TcCLB.507211.40	Q4CUG6	1.151	0.240182	Inosine-5'-monophosphate dehydrogenase
TcCLB.511585.190	Q4E162	1.14991	0.191895	Probable eukaryotic initiation factor 4A
TcCLB.510947.30	Q4CU92	1.14943	0.145073	Uncharacterized protein
TcCLB.506195.110	Q4DXL5	1.14901	0.123911	Malate dehydrogenase
TcCLB.510029.70	Q4CWD6	1.14638	0.274049	40S ribosomal protein S13, putative
TcCLB.506247.10	Q4E156	1.14571	0.350342	Protein disulfide isomerase, putative (Fragment)
TcCLB.510089.110	Q4DQZ8	1.14524	0.0573301	Uncharacterized protein
TcCLB.511215.70	Q4DIG0	1.14475	0.415	Kinesin, putative
TcCLB.508089.30	Q4CYV9	1.14466	0.277739	Uncharacterized protein
TcCLB.508347.130	Q4DSX1	1.14414	0.298749	Deoxyhypusine hydroxylase
TcCLB.504741.20	Q4DTU3	1.14403	0.393291	Obg-like ATPase 1
TcCLB.511181.50	Q4DPR3	1.14306	0.324394	Mitochondrial processing peptidase, beta subunit, putative
TcCLB.509233.180	Q4DTX7	1.14208	0.183095	ATP synthase subunit beta
TcCLB.511211.120	Q4DTN2	1.14145	0.194001	Activated protein kinase C receptor, putative
TcCLB.506559.410	Q4E589	1.14123	0.236102	Uncharacterized protein
TcCLB.511289.70	Q4DD13	1.14041	0.276955	ADP,ATP carrier protein 1, mitochondrial, putative
TcCLB.506989.190	Q4DW89	1.13894	0.247564	Lipophosphoglycan biosynthetic protein, putative
TcCLB.508665.14	Q4CNM5	1.13775	0.257123	ATP-dependent Clp protease subunit, heat shock protein 100 (HSP100), putative (Fragment)
TcCLB.509215.40	Q4D2G4	1.13747	0.366255	Peptidyl-prolyl cis-trans isomerase
TcCLB.470399.10	Q4CKY4	1.13616	0.353413	Peptidyl-prolyl cis-trans isomerase (Fragment)
TcCLB.510643.190	Q4DWU4	1.13562	0.320782	Retrotransposon hot spot (RHS) protein, putative
TcCLB.508319.70	Q4D0U7	1.13283	0.278919	40S ribosomal protein S11, putative
TcCLB.508355.250	Q4E3A4	1.1304	0.0938725	60S acidic ribosomal protein P0
TcCLB.508175.146	Q4E2Y1	1.13007	0.370138	60S ribosomal protein L23a, putative
TcCLB.508039.30	Q4CYR3	1.12889	0.336246	Retrotransposon hot spot (RHS) protein, putative
TcCLB.504423.30	Q4CYL3	1.12822	0.278405	Uncharacterized protein
TcCLB.509695.210	Q4DTP7	1.12332	0.27624	Carboxypeptidase
TcCLB.507603.40	Q4DW25	1.12293	0.436288	Proteasome subunit beta type
TcCLB.510969.40	Q4CNT1	1.11887	0.404443	Uncharacterized protein (Fragment)
TcCLB.506201.39	Q4DG86	1.11874	0.315091	25 kDa translation elongation factor 1-beta, putative
TcCLB.508989.9	Q4DAD9	1.11805	0.197839	Nucleoside phosphorylase, putative (Fragment)
TcCLB.506127.30	Q4DP96	1.11506	0.352332	Phenylalanyl-tRNA synthetase, putative
TcCLB.503613.20	Q4CYK5	1.11349	0.381473	Proteasome subunit alpha type
TcCLB.510755.129	Q4D7Y0	1.11201	0.393906	60S ribosomal protein L12, putative
TcCLB.509541.19	Q4CRB1	1.10757	0.169016	Major vault protein, putative (Fragment)
TcCLB.510661.250	Q4DUG8	1.10692	0.319853	Cystathione gamma lyase, putative
TcCLB.510943.50	Q4DRT8	1.1059	0.319143	Delta-1-pyrroline-5-carboxylate dehydrogenase, putative
TcCLB.508293.90	Q4DLA7	1.10523	0.208341	Elongation factor 1-gamma (EF-1-gamma), putative
TcCLB.507963.79	Q4D5X8	1.10516	0.32094	Nucleosome assembly protein, putative
TcCLB.507555.80	Q4D5T6	1.10458	0.431604	Retrotransposon hot spot (RHS) protein, putative
TcCLB.506367.30	Q4DFX2	1.10211	0.282033	Uncharacterized protein
TcCLB.510945.70	Q4D1Q4	1.10108	0.237588	Aspartate aminotransferase, mitochondrial, putative
TcCLB.430605.29	Q4CUL0	1.10008	0.358638	40S ribosomal protein S3, putative
TcCLB.504021.109	Q4DMK9	1.09934	0.358794	40S ribosomal protein S3, putative
TcCLB.506859.180	Q4DVF8	1.09907	0.310909	Uncharacterized protein
TcCLB.504433.10	Q4D2I4	1.09834	0.274659	ADP-ribosylation factor 3, putative
TcCLB.511229.110	Q4D449	1.09736	0.346197	Glycyl-tRNA synthetase, putative
TcCLB.507615.70	Q4DN31	1.09734	0.391078	Deoxyhypusine hydroxylase
TcCLB.509787.10	Q4CUW8	1.09517	0.397586	Retrotransposon hot spot (RHS) protein, putative
TcCLB.506621.30	Q4D6V2	1.09501	0.278588	Ribonucleoside-diphosphate reductase small chain, putative
TcCLB.508085.10	Q4CNX6	1.09383	0.387299	GMP synthase, putative (Fragment)
TcCLB.511293.69	Q4DDK8	1.09338	0.253406	Glycosomal malate dehydrogenase, putative
TcCLB.508441.20	Q4DB81	1.09306	0.212464	Glycosomal phosphoenolpyruvate carboxykinase, putative
TcCLB.509177.30	Q4CXU1	1.09106	0.387348	RNA cytidine acetyltransferase
TcCLB.509051.20	Q4CVL1	1.09096	0.270125	Amastin, putative
TcCLB.508153.280	Q4E661	1.08993	0.138252	60S ribosomal protein L13
TcCLB.508461.80	Q4E4V7	1.08975	0.106429	Prostaglandin F2alpha synthase
TcCLB.505977.26	Q4CSS8	1.08968	0.414825	60S acidic ribosomal protein P2, putative
TcCLB.507059.60	Q4DBC5	1.08852	0.39631	Orotidine-5-phosphate decarboxylase/orotate phosphoribosyltransferase, putative
TcCLB.506235.20	Q4CSK3	1.08824	0.248872	Uncharacterized protein
TcCLB.506301.50	Q4D0L3	1.08816	0.372288	Succinyl-CoA:3-ketoacid-coenzyme A transferase
TcCLB.509915.60	Q4DKH6	1.0829	0.409183	Retrotransposon hot spot (RHS) protein, putative
TcCLB.508741.170	Q4E355	1.08276	0.168511	Uncharacterized protein
TcCLB.510187.551	Q4E496	1.08072	0.1588	Chaperonin HSP60 mitochondrial, putative (Fragment)
TcCLB.505183.20	Q4DJ69	1.07827	0.401114	Malic enzyme
TcCLB.508461.270	Q4E4T4	1.07783	0.365899	Rab7 GTP binding protein, putative
TcCLB.508717.30	Q4D9I0	1.0772	0.439192	Phosphoribosylpyrophosphate synthetase, putative
TcCLB.506529.430	Q4E5N8	1.07671	0.350584	Alanine aminotransferase, putative
TcCLB.510655.90	Q4DFY2	1.07618	0.456105	Uncharacterized protein
TcCLB.510421.130	Q4DXR8	1.07583	0.198751	Uncharacterized protein
TcCLB.506679.140	Q4E088	1.0734	0.461702	40S ribosomal protein S10, putative
TcCLB.511291.90	Q4DC38	1.07194	0.380471	40S ribosomal protein S13, putative
TcCLB.507641.290	Q4DYP5	1.07049	0.157194	Chaperonin HSP60, mitochondrial
TcCLB.510889.221	Q4E2M9	1.06915	0.37095	Glucose-6-phosphate isomerase
TcCLB.508637.90	Q4DLI9	1.068	0.440472	Phosphoglucomutase, putative
TcCLB.509695.200	Q4DTP9	1.06731	0.325186	T-complex protein 1 subunit delta
TcCLB.508881.120	Q4DMH3	1.0671	0.444509	Prefoldin subunit 3
TcCLB.510879.110	Q4DJX1	1.06607	0.356308	Ribosomal protein L3, putative
TcCLB.506937.10	Q4CTR7	1.06537	0.348132	Malate dehydrogenase
TcCLB.506679.100	Q4E093	1.06285	0.411381	40S ribosomal protein S18, putative
TcCLB.508271.10	Q4CXE3	1.06123	0.415535	Phenylalanyl-tRNA synthetase, putative
TcCLB.506405.120	Q4DED4	1.06047	0.416351	V-type ATPase, A subunit, putative
TcCLB.510947.10	Q4CU94	1.06013	0.371289	Mannose-1-phosphate guanyltransferase, putative
TcCLB.503957.120	Q4DKR6	1.05999	0.350748	Retrotransposon hot spot (RHS) protein, putative
TcCLB.504117.20	Q4CZ23	1.05939	0.461188	Sedoheptulose-1,7-bisphosphatase, putative
TcCLB.505807.110	Q4DQH9	1.05876	0.416778	Alkyl-dihydroxyacetone phosphate synthase, putative
TcCLB.508501.250	Q4DUU1	1.05618	0.411578	Uncharacterized protein
TcCLB.509505.40	Q4D001	1.05502	0.466671	Uncharacterized protein
TcCLB.509197.50	Q4CVF2	1.05419	0.402524	Uncharacterized protein (Fragment)
TcCLB.511229.50	Q4D455	1.05147	0.275328	Adenosylhomocysteinase
TcCLB.507831.60	Q4DI67	1.04979	0.177534	Heat shock protein, putative
TcCLB.506739.50	Q4DEP1	1.04946	0.377386	Heat shock protein HslVU, ATPase subunit HslU, putative
TcCLB.510241.50	Q4DD50	1.04933	0.429047	60S ribosomal protein L10, putative
TcCLB.509205.120	Q4D7E5	1.04798	0.37162	Uncharacterized protein
TcCLB.508169.20	Q4D5X0	1.04778	0.137219	Elongation factor 2, putative
TcCLB.507569.10	Q4CTC8	1.04728	0.428833	Uncharacterized protein
TcCLB.503929.10	Q4CZX4	1.04669	0.425439	V-type ATPase, A subunit, putative
TcCLB.509463.30	Q4CYP2	1.04568	0.371955	3-ketoacyl-CoA thiolase, putative
TcCLB.505843.10	Q4CVH4	1.04472	0.424791	Glutamate dehydrogenase, putative (Fragment)
TcCLB.506585.40	Q4D620	1.04447	0.38772	Glucose-regulated protein 78, putative
TcCLB.506945.320	Q4DX68	1.04347	0.418399	Uncharacterized protein
TcCLB.509769.60	Q4DKU9	1.0429	0.471528	Uncharacterized protein
TcCLB.509287.50	Q4E0B2	1.04285	0.298033	Glucose-6-phosphate 1-dehydrogenase
TcCLB.511333.4	Q4CP00	1.04164	0.269581	Cytoskeleton-associated protein CAP5.5, putative (Fragment)
TcCLB.506977.90	Q4DBY0	1.04146	0.418403	Proteasome regulatory non-ATPase subunit 5, putative
TcCLB.509497.20	Q4CMT5	1.04077	0.294102	Uncharacterized protein
TcCLB.509999.90	Q4DKK5	1.0407	0.369756	Carnitine/choline acetyltransferase, putative
TcCLB.511727.50	Q4DY53	1.03985	0.451706	Uncharacterized protein
TcCLB.506443.150	Q4DME9	1.03943	0.438995	Retrotransposon hot spot (RHS) protein, putative
TcCLB.509879.40	Q4CQW5	1.03743	0.481057	Fumarate hydratase, putative
TcCLB.507929.20	Q4CPP0	1.0347	0.450118	Co-chaperone GrpE, putative
TcCLB.510655.120	Q4DFX9	1.03413	0.416378	Aminopeptidase P, putative
TcCLB.511491.100	Q4DHP0	1.03386	0.476937	Phosphatase 2C, putative
TcCLB.506843.40	Q4DKM0	1.03376	0.444059	Retrotransposon hot spot (RHS) protein, putative
TcCLB.508461.410	Q4E4R8	1.03331	0.0907501	T-complex protein 1, eta subunit, putative
TcCLB.507609.60	Q4DFC2	1.03267	0.439811	Myo-inositol-1-phosphate synthase, putative
TcCLB.509109.120	Q4DQM4	1.03204	0.41578	Protein tyrosine phosphatase, putative
TcCLB.510889.120	Q4E2N8	1.03153	0.436841	Alanine aminotransferase, putative
TcCLB.507641.300	Q4DYP4	1.03119	0.333524	Chaperonin HSP60, mitochondrial (Fragment)
TcCLB.511211.170	Q4DTM8	1.03114	0.409271	Heat shock protein 70 (HSP70), putative
TcCLB.509611.180	Q4DK88	1.03083	0.467744	Peptide methionine sulfoxide reductase, putative
TcCLB.509335.10	Q4CQB8	1.03014	0.358861	Retrotransposon hot spot (RHS) protein, putative
TcCLB.511461.20	Q4D3Y8	1.02813	0.375954	Tyrosine aminotransferase
TcCLB.511903.40	Q4DU88	1.02771	0.438588	Uncharacterized protein
TcCLB.507681.20	Q4DW49	1.02771	0.397933	Succinate--CoA ligase [ADP-forming] subunit beta, mitochondrial
TcCLB.503617.40	Q4CXB4	1.02592	0.451107	ATPase alpha subunit, putative (Fragment)
TcCLB.509139.10	Q4CNI8	1.0256	0.403419	Uncharacterized protein
TcCLB.510001.59	Q4CY83	1.02538	0.479865	Uncharacterized protein (Fragment)
TcCLB.506537.299	Q4DZC9	1.02534	0.472756	Retrotransposon hot spot (RHS) protein, putative (Fragment)
TcCLB.507081.130	Q4DGT6	1.02491	0.447394	Uncharacterized protein
TcCLB.504421.19	Q4CR23	1.02373	0.484832	Uncharacterized protein
TcCLB.508543.30	Q4DSJ7	1.02317	0.474948	40S ribosomal protein S9, putative
TcCLB.503679.10	Q4CRK6	1.02272	0.482248	Aspartate aminotransferase
TcCLB.504147.80	Q4DZN7	1.02236	0.487353	Mitochondrial intermediate peptidase, putative
TcCLB.511353.10	Q4CZN2	1.02185	0.304818	Peptidylprolyl isomerase
TcCLB.511277.290	Q4E5G5	1.02183	0.432743	Aconitate hydratase
TcCLB.507689.30	Q4CYZ6	1.01789	0.452314	Glutamamyl carboxypeptidase, putative
TcCLB.508475.10	Q4D6H7	1.01739	0.488946	Ribosomal protein S20, putative
TcCLB.511903.120	Q4DU82	1.01738	0.438263	Transketolase
TcCLB.508805.80	Q4D5D5	1.01624	0.462509	Short chain dehydrogenase, putative
TcCLB.511621.50	Q4DT61	1.01618	0.454475	RNA-binding protein, putative
TcCLB.507625.10	Q4DPF1	1.0161	0.462371	Retrotransposon hot spot (RHS) protein, putative
TcCLB.507993.260	Q4E1V5	1.01497	0.476226	Uncharacterized protein
TcCLB.508153.400	Q4E650	1.01412	0.479751	Serine/threonine protein kinase, putative
TcCLB.506563.40	Q4DQP2	1.01292	0.455899	Tubulin beta chain
TcCLB.506529.420	Q4E5P0	1.00925	0.479115	Alanine aminotransferase, putative
TcCLB.509749.10	Q4CPE2	1.00751	0.490133	Biotin/lipoate protein ligase, putative
TcCLB.506425.169	Q4DM40	1.0067	0.495755	Ras-related protein rab-2a, putative (Fragment)
TcCLB.510257.10	Q4DBL3	1.00623	0.496325	Uncharacterized protein (Fragment)
TcCLB.507951.299	Q4DUR3	1.00348	0.493195	Uncharacterized protein (Fragment)
TcCLB.507251.20	Q4CQJ7	1.00268	0.493241	Ribosomal protein L21E (60S), putative
TcCLB.510889.140	Q4E2N6	1.00208	0.495143	Alanine aminotransferase, putative
TcCLB.511899.40	Q4CT37	1.00208	0.491293	2-amino-3-ketobutyrate coenzyme A ligase, putative
TcCLB.507925.40	Q4D360	1.00113	0.497017	Pyridoxal kinase, putative
TcCLB.511323.40	Q4CY73	1.00109	0.499082	Histone H2A
TcCLB.507089.170	Q4DWM7	1.00074	0.498853	Uncharacterized protein
TcCLB.511807.110	Q4E1D4	-1.0002	0.499695	GMP synthase, putative
TcCLB.508989.90	Q4DAD2	-1.00118	0.499239	Uncharacterized protein
TcCLB.503477.20	Q4CUD7	-1.008	0.477397	Transaldolase
TcCLB.508175.100	Q4E2Y4	-1.00965	0.484875	Uncharacterized protein
TcCLB.506323.30	Q4D0U5	-1.01048	0.48371	Retrotransposon hot spot (RHS) protein, putative
TcCLB.509351.10	Q4CM74	-1.01086	0.485585	Delta-1-pyrroline-5-carboxylate dehydrogenase, putative (Fragment)
TcCLB.511263.9	Q4D673	-1.01126	0.460467	Heat shock protein, putative (Fragment)
TcCLB.509067.70	Q4D112	-1.01143	0.465718	Pyrroline-5-carboxylate synthetase-like protein, putative (Fragment)
TcCLB.503593.30	Q4D509	-1.01356	0.490875	Uncharacterized protein
TcCLB.508959.4	Q4CV48	-1.01499	0.478003	Cytochrome c, putative
TcCLB.509167.150	Q4DQQ2	-1.0184	0.479393	Homoserine kinase, putative
TcCLB.510395.10	Q4CNR6	-1.01872	0.459809	ATP synthase, alpha chain, mitochondrial, putative (Fragment)
TcCLB.511023.10	Q4CM65	-1.01925	0.431598	Pyrroline-5-carboxylate synthetase-like protein, putative (Fragment)
TcCLB.507671.30	Q4CQA2	-1.01986	0.470805	25 kDa translation elongation factor 1-beta
TcCLB.506831.40	Q4D4C9	-1.02088	0.442076	3-hydroxy-3-methylglutaryl coenzyme A reductase
TcCLB.511531.40	Q4D0F4	-1.02165	0.425537	Chaperonin alpha subunit, putative
TcCLB.511583.40	Q4CVF7	-1.02457	0.461025	Tricarboxylate carrier, putative
TcCLB.511001.9	Q4DZ41	-1.02522	0.376801	40S ribosomal protein S3a-2
TcCLB.511303.60	Q4DSL1	-1.02548	0.450705	Translation initiation factor, putative
TcCLB.509965.290	Q4E0T1	-1.02658	0.467226	p22 protein, putative
TcCLB.511025.70	Q4DD37	-1.03302	0.38722	Chaperonin alpha subunit, putative
TcCLB.510837.20	Q4CR09	-1.03543	0.382589	Glutamamyl carboxypeptidase, putative
TcCLB.506725.20	Q4D965	-1.03866	0.447458	Uncharacterized protein
TcCLB.509539.50	Q4D318	-1.03868	0.460422	Small GTP-binding protein, putative
TcCLB.510187.30	Q4E4E7	-1.03873	0.357937	Tyrosine aminotransferase
TcCLB.506835.80	Q4DGP7	-1.03892	0.450363	CAS/CSE/importin domain protein, putative
TcCLB.507657.20	Q4CPW5	-1.03944	0.374401	Glutamamyl carboxypeptidase, putative
TcCLB.508577.160	Q4DPB7	-1.04111	0.46818	Proteasome subunit beta type
TcCLB.504427.110	Q4DYN2	-1.04149	0.417851	Acetyl-coenzyme A synthetase
TcCLB.506241.170	Q4DU31	-1.04172	0.445374	40S ribosomal protein S6
TcCLB.509735.120	Q4DQ04	-1.04601	0.425101	Retrotransposon hot spot (RHS) protein, putative
TcCLB.509317.60	Q4D488	-1.0474	0.403033	RNA-binding protein, putative
TcCLB.508299.80	Q4D9G6	-1.04775	0.417036	Threonyl-tRNA synthetase, putative
TcCLB.506247.330	Q4E122	-1.04997	0.441489	2,3-bisphosphoglycerate-independent phosphoglycerate mutase, putative
TcCLB.508919.20	Q4DL81	-1.05018	0.46722	Uncharacterized protein
TcCLB.510647.30	Q4CTS7	-1.05034	0.463151	Tryptophanyl-tRNA synthetase, putative
TcCLB.507691.50	Q4DD28	-1.05157	0.47082	Retrotransposon hot spot (RHS) protein, putative
TcCLB.511821.179	Q4DQS9	-1.05652	0.337481	Uncharacterized protein (Fragment)
TcCLB.510101.40	Q4E3Q3	-1.05685	0.406309	60S ribosomal protein L28, putative
TcCLB.507537.30	Q4CUZ9	-1.05728	0.447539	Cysteinyl-tRNA synthetase, putative
TcCLB.509261.30	Q4CTQ3	-1.05818	0.412927	3,2-trans-enoyl-CoA isomerase, mitochondrial, putative
TcCLB.503781.90	Q4D8U5	-1.05839	0.375299	Universal minicircle sequence binding protein (UMSBP), putative
TcCLB.511555.80	Q4DFS6	-1.05908	0.373928	Ribonucleoside-diphosphate reductase small chain, putative
TcCLB.510163.20	Q4CXW2	-1.05926	0.317626	Elongation factor 1-gamma (EF-1-gamma), putative
TcCLB.509429.4	Q4E0M5	-1.06157	0.348581	Retrotransposon hot spot (RHS) protein, putative (Fragment)
TcCLB.508975.10	Q4CV98	-1.06213	0.459516	Acyl-CoA dehydrogenase, mitochondrial, putative
TcCLB.504191.10	Q4CMB7	-1.06316	0.366485	Methyltransferase
TcCLB.510751.4	Q4CSP6	-1.06354	0.390206	Aminopeptidase P, putative (Fragment)
TcCLB.511301.70	Q4DM85	-1.06387	0.283701	Peptidylprolyl isomerase
TcCLB.508707.310	Q4E246	-1.06421	0.306181	Uncharacterized protein
TcCLB.504181.20	Q4DTQ1	-1.06501	0.443172	40S ribosomal protein S23, putative
TcCLB.509237.10	Q4DJT8	-1.06584	0.391202	Mevalonate kinase
TcCLB.508461.140	Q4E4V0	-1.06602	0.223325	Polyadenylate-binding protein
TcCLB.506835.110	Q4DGP4	-1.06739	0.222464	Uncharacterized protein
TcCLB.508601.141	Q4DBP7	-1.06845	0.294371	Dipeptidyl-peptidase, putative (Fragment)
TcCLB.504143.10	Q4CPN7	-1.06881	0.396949	Uncharacterized protein (Fragment)
TcCLB.508647.280	Q4DV36	-1.06997	0.272867	Malic enzyme
TcCLB.506313.10	Q4CMJ5	-1.07628	0.405018	Retrotransposon hot spot (RHS) protein, putative (Fragment)
TcCLB.509267.40	Q4DDK1	-1.07636	0.401012	Uncharacterized protein
TcCLB.507767.10	Q4CLP3	-1.07745	0.199877	Succinyl-CoA ligase [GDP-forming] beta-chain, putative (Fragment)
TcCLB.506529.508	Q4E5N1	-1.07946	0.347104	Glucose-6-phosphate isomerase
TcCLB.510663.70	Q4D0X5	-1.08066	0.284299	6-phosphogluconate dehydrogenase, decarboxylating
TcCLB.510437.40	Q4D123	-1.08365	0.347428	Malate dehydrogenase
TcCLB.505183.30	Q4DJ68	-1.0855	0.259936	Malic enzyme
TcCLB.506649.20	Q4DE37	-1.08566	0.396695	Plasma membrane ATPase
TcCLB.508457.20	Q4CS27	-1.0861	0.428272	Uncharacterized protein
TcCLB.510099.120	Q4DAE1	-1.08936	0.212702	D-isomer specific 2-hydroxyacid dehydrogenase-protein, putative
TcCLB.508827.70	Q4DK40	-1.09093	0.462391	40S ribosomal protein S17, putative
TcCLB.506405.149	Q4DED2	-1.0918	0.283789	Ribosomal protein L21E (60S), putative
TcCLB.509105.140	Q4DBM7	-1.09356	0.293848	Heat shock protein 85, putative
TcCLB.506163.50	Q4D734	-1.09572	0.356092	Uncharacterized protein
TcCLB.509213.120	Q4DGX6	-1.09705	0.210877	Peptidase M20/M25/M40, putative
TcCLB.506435.410	Q4E301	-1.09844	0.418363	Uracil phosphoribosyltransferase, putative
TcCLB.503945.40	Q4CQA8	-1.09862	0.343088	6-phosphogluconolactonase, putative
TcCLB.506393.189	Q4DL82	-1.10303	0.264861	Retrotransposon hot spot (RHS) protein, putative (Fragment)
TcCLB.506943.4	Q4DCP7	-1.10319	0.436935	Aldehyde dehydrogenase, putative (Fragment)
TcCLB.511127.110	Q4E408	-1.10379	0.395766	Heat shock protein HslVU, ATPase subunit HslU, putative
TcCLB.511167.90	Q4DHC9	-1.10395	0.309479	14-3-3 protein, putative
TcCLB.503539.30	Q4CP51	-1.10405	0.349684	GTP-binding nuclear protein
TcCLB.506853.50	Q4D184	-1.10732	0.350535	2-oxoisovalerate dehydrogenase alpha subunit, putative
TcCLB.510323.40	G3XCP0	-1.10795	0.361049	Heat shock protein 20, putative
TcCLB.509963.40	Q4D276	-1.10921	0.43809	Dispersed gene family protein 1 (DGF-1), putative
TcCLB.504153.310	Q4E2Q2	-1.10965	0.0724553	Heat shock protein, putative
TcCLB.508971.40	Q4D7V2	-1.11309	0.275408	Acetylornithine deacetylase-like, putative
TcCLB.506321.290	Q4DYD9	-1.11456	0.200519	Stress-induced protein sti1, putative
TcCLB.507611.370	Q4E3F7	-1.11772	0.314996	Protein disulfide-isomerase
TcCLB.503945.10	Q4CQB1	-1.11974	0.397834	Eukaryotic translation initiation factor 1A, putative (Fragment)
TcCLB.504153.280	Q4E2Q5	-1.11982	0.292204	Uncharacterized protein
TcCLB.509997.30	Q4D1B8	-1.12062	0.294892	Tryparedoxin, putative
TcCLB.509033.80	Q4D9F7	-1.12237	0.431441	Uncharacterized protein
TcCLB.506945.160	Q4CSC4	-1.12734	0.188313	S-adenosylmethionine synthase
TcCLB.507001.110	Q4DF18	-1.12803	0.300034	Galactokinase-like protein, putative
TcCLB.511051.70	Q4D5P1	-1.13024	0.0738841	Aminopeptidase
TcCLB.511367.220	Q4DYH1	-1.13451	0.289722	Uncharacterized protein
TcCLB.510089.200	Q4DQZ2	-1.1346	0.31413	Uncharacterized protein
TcCLB.507927.20	Q4D590	-1.13604	0.41057	Mitochondrial oligo_U binding protein TBRGG1, putative
TcCLB.509001.40	Q4CV42	-1.13668	0.399926	Calpain-like cysteine peptidase, putative
TcCLB.510101.140	Q4E3P5	-1.13697	0.110758	Pyruvate, phosphate dikinase
TcCLB.508209.120	Q4DFA8	-1.13766	0.397135	10 kDa heat shock protein, putative
TcCLB.504069.30	Q4D1H8	-1.13947	0.39543	60S ribosomal protein L32, putative
TcCLB.511261.160	Q4DL16	-1.13983	0.287342	Pyruvate dehydrogenase E1 component alpha subunit, putative (Fragment)
TcCLB.507529.50	Q4D234	-1.14234	0.130318	Uncharacterized protein
TcCLB.507639.30	Q4D6T7	-1.14331	0.278136	Universal minicircle sequence binding protein (UMSBP)
TRS	Q9GT49	-1.14827	0.111167	Trypanothione synthetase
TcCLB.506261.10	Q4CMD9	-1.14847	0.305391	Fatty acyl CoA synthetase 2, putative
TcCLB.503655.20	Q4D8Y4	-1.15336	0.373428	Dispersed gene family protein 1 (DGF-1), putative
TcCLB.503833.40	Q4DIZ9	-1.15463	0.315274	40S ribosomal protein S2, putative
TcCLB.509461.60	Q4DBM0	-1.15499	0.392228	Mitochondrial RNA binding protein, putative
TcCLB.507297.20	Q4CQ34	-1.15588	0.364887	Cysteinyl-tRNA synthetase, putative
TcCLB.506297.190	Q4E0Q0	-1.15764	0.0821602	Pyruvate, phosphate dikinase
TcCLB.510381.10	Q4CYV4	-1.15901	0.073587	Cystathionine beta-synthase, putative
TcCLB.510717.30	Q4CTE8	-1.16529	0.26158	2-oxoglutarate dehydrogenase E1 component, putative
TcCLB.508409.210	Q4DWS5	-1.16549	0.108584	Hsc70-interacting protein, putative
TcCLB.510439.61	Q4CU95	-1.16697	0.211475	Heat shock 70 kDa protein, putative (Fragment)
TcCLB.507519.110	Q4DNZ7	-1.16935	0.32751	60S ribosomal protein L7, putative
TcCLB.509733.170	Q4DWB5	-1.16942	0.242175	Transitional endoplasmic reticulum ATPase, putative
TcCLB.511391.120	Q4DU62	-1.17098	0.10108	Glutamamyl carboxypeptidase, putative
TcCLB.506885.14	Q4DXW6	-1.17558	0.380101	Ribosomal protein L37
TcCLB.508177.110	Q4DF38	-1.17622	0.118592	Cystathionine beta-synthase
TcCLB.511691.20	Q4CRW9	-1.17857	0.0635824	Cystathionine beta-synthase
TcCLB.511215.119	Q4DIF6	-1.17962	0.251952	69 kDa paraflagellar rod protein, putative
TcCLB.506275.20	Q4D729	-1.1805	0.204988	Hslvu complex proteolytic subunit-like, putative
TcCLB.509617.20	Q4D634	-1.18174	0.175988	Paraflagellar rod protein 3, putative
TcCLB.510329.130	Q4E3K0	-1.18258	0.41466	UDP-glucose:glycoprotein glucosyltransferase
TcCLB.506047.20	Q4CUP4	-1.1831	0.0256562	Retrotransposon hot spot (RHS) protein, putative
TcCLB.509733.100	Q4DWC3	-1.1871	0.00963501	Translation elongation factor 1-beta, putative
TcCLB.509895.20	Q4DCY2	-1.18754	0.345091	Uncharacterized protein
TcCLB.507029.30	Q4CVR9	-1.18861	0.175871	Heat shock 70 kDa protein, mitochondrial, putative
TcCLB.506749.20	Q4CS05	-1.19279	0.279086	Flagellar calcium-binding protein, putative
TcCLB.506411.10	Q4CVA3	-1.19773	0.209809	Thimet oligopeptidase, putative
TcCLB.508589.30	Q4D3Z2	-1.20004	0.33155	Retrotransposon hot spot (RHS) protein, putative
TcCLB.506127.150	Q4DP85	-1.20075	0.38211	Uncharacterized protein
TcCLB.506559.470	Q4E581	-1.20418	0.275037	Ribosomal protein L35A, putative
TcCLB.511019.74	Q4DI32	-1.20623	0.216903	Retrotransposon hot spot (RHS) protein, putative
TcCLB.511773.110	Q4D9N3	-1.20738	0.275744	Retrotransposon hot spot (RHS) protein, putative
TcCLB.509499.14	Q4CX87	-1.20835	0.25156	Tryparedoxin peroxidase, putative
TcCLB.510143.24	Q4DAT6	-1.20947	0.0508158	Hsc70-interacting protein (Hip), putative
TcCLB.508737.100	Q4DTH5	-1.20993	0.204997	ATP-dependent Clp protease subunit, heat shock protein 78, putative
TcCLB.509023.10	Q4DRP5	-1.21406	0.38873	Uncharacterized protein
TcCLB.508083.10	Q4CRR1	-1.21587	0.28997	Uncharacterized protein
TcCLB.510131.40	Q4D5I2	-1.2182	0.250109	Haloacid dehalogenase-like hydrolase, putative
TcCLB.506957.90	Q4DKZ4	-1.21839	0.200393	60S ribosomal protein L18a
TcCLB.511731.60	Q4D7F9	-1.2214	0.116217	Glutamyl-tRNA synthetase, putative
TcCLB.508373.29	Q4CSV7	-1.22293	0.213787	Orotidine-5-phosphate decarboxylase/orotate phosphoribosyltransferase, putative (Fragment)
TcCLB.504045.60	Q4D9T0	-1.22423	0.174999	Thermostable carboxypeptidase 1, putative
TcCLB.506337.70	Q4DKY2	-1.22473	0.263073	2-oxoglutarate dehydrogenase E1 component, putative
TcCLB.506401.180	Q4E3S5	-1.22792	0.344336	Uncharacterized protein
TcCLB.503849.60	Q4D779	-1.23057	0.0516417	NADH-dependent fumarate reductase, putative
TcCLB.409117.20	Q4D6I5	-1.23132	0.201709	40S ribosomal protein S14, putative
TcCLB.506941.280	Q4DXG9	-1.23225	0.0534434	Heat shock 70 kDa protein, mitochondrial, putative (Fragment)
TcCLB.510421.210	Q4DXR1	-1.23448	0.12543	Uncharacterized protein
TcCLB.510119.20	Q4CXI1	-1.24137	0.191081	Elongation factor 1-alpha
TcCLB.510679.40	Q4CYC6	-1.2423	0.0842794	Uncharacterized protein
TcCLB.506503.160	Q4DRD0	-1.24478	0.363839	Uncharacterized protein
TcCLB.506301.11	Q4D0L7	-1.25022	0.0263144	Heat shock protein, putative (Fragment)
TcCLB.506135.9	Q4DAZ6	-1.25298	0.149599	Heat shock 70 kDa protein, putative (Fragment)
TcCLB.511441.10	Q4CS87	-1.25309	0.0468858	Calpain cysteine peptidase, putative (Fragment)
TcCLB.510689.50	Q4D577	-1.25518	0.370615	Cell differentiation protein, putative
TcCLB.508323.20	Q4DFM2	-1.25931	0.374533	Uncharacterized protein
TcCLB.503483.9	Q4CMA6	-1.25951	0.171001	Retrotransposon hot spot (RHS) protein, putative (Fragment)
TcCLB.510659.240	Q4D7B4	-1.26129	0.238166	Lactoylglutathione lyase-like protein, putative
TcCLB.503721.39	Q4CWF4	-1.26385	0.168235	Heat shock 70 kDa protein, putative (Fragment)
TcCLB.509109.30	Q4DQN2	-1.26459	0.285856	Uncharacterized protein
TcCLB.503625.10	Q4CRM4	-1.26486	0.0937783	Asparagine synthetase A, putative
TcCLB.508851.50	Q4DJD0	-1.26549	0.352518	Uncharacterized protein
TcCLB.508473.10	Q4CRR5	-1.26766	0.108941	Retrotransposon hot spot (RHS) protein, putative
TcCLB.511527.70	Q4D5J9	-1.26954	0.370078	Myosin heavy chain, putative
TcCLB.507641.60	Q4DYS1	-1.26983	0.175866	Aldehyde dehydrogenase, putative
TcCLB.510509.50	Q4CVB9	-1.27045	0.374817	Mitochondrial RNA binding protein, putative (Fragment)
TcCLB.511369.10	Q4CRF7	-1.27228	0.164291	Elongation factor 1-alpha
TcCLB.508153.730	Q4E620	-1.27566	0.0919902	Elongation initiation factor 2 alpha subunit, putative
TcCLB.507513.60	Q4D916	-1.27671	0.0410091	40S ribosomal protein S16, putative
TcCLB.503719.20	Q4CQU0	-1.28074	0.109672	40S ribosomal protein SA
EIF6	Q4E097	-1.28178	0.258791	Eukaryotic translation initiation factor 6
TcCLB.508465.90	Q4DHU8	-1.28437	0.121826	Galactokinase, putative
TcCLB.510901.150	Q4DXC0	-1.2845	0.132742	Proteasome regulatory non-ATPase subunit 2, putative
TcCLB.511283.10	Q4E2V9	-1.28764	0.0355565	Uncharacterized protein
TcCLB.506247.210	Q4E134	-1.28806	0.311732	Uncharacterized protein
TcCLB.508857.160	Q4DLL4	-1.2895	0.328225	Threonine synthase, putative
TcCLB.508153.60	Q4E686	-1.29972	0.063516	Aminopeptidase
TcCLB.508973.50	Q4DBF7	-1.30021	0.343758	ATP-dependent DEAD/H RNA helicase, putative
TcCLB.510311.70	Q4DTF6	-1.30104	0.257376	26S protease regulatory subunit, putative
TcCLB.507515.4	Q4DJ87	-1.3019	0.294044	Glutathione peroxidase (Fragment)
TcCLB.506959.120	Q4DIC9	-1.30782	0.316945	60S ribosomal protein L30, putative
TcCLB.509207.40	Q4DH64	-1.31079	0.301422	Uncharacterized protein
TcCLB.506559.350	Q4E595	-1.3124	0.240062	Asparaginyl-tRNA synthetase, putative
TcCLB.436521.9	Q4CLD0	-1.31368	0.0252579	Mevalonate kinase (Fragment)
TcCLB.508209.110	Q4DFA9	-1.31522	0.274132	Uncharacterized protein
TcCLB.404001.20	Q4CX61	-1.3178	0.278521	Uncharacterized protein (Fragment)
TcCLB.509391.10	Q4D1Q2	-1.32199	0.231094	Calcium-binding protein, putative
TcCLB.507033.10	Q4CVE4	-1.32231	0.336256	Uncharacterized protein
TcCLB.511389.150	Q4DIT6	-1.3232	0.289501	Thiolase protein-like protein, putative
TcCLB.511661.90	Q4DIR4	-1.32422	0.356534	Ribose-phosphate pyrophosphokinase, putative
TcCLB.509053.70	Q4DG13	-1.32485	0.157999	p22 protein, putative
TcCLB.508177.90	Q4DF40	-1.33098	0.209652	Uncharacterized protein
TcCLB.506925.104	Q4E4N7	-1.33578	0.362266	Dynein light chain, putative
TcCLB.503995.50	Q4CW30	-1.33677	0.157031	Oligopeptidase B, putative
TcCLB.508175.329	Q4E2W4	-1.34273	0.117224	60S ribosomal protein L19, putative
TcCLB.510515.100	Q4DEX0	-1.34721	0.357703	Coronin, putative
TcCLB.504157.10	Q4DGN8	-1.3678	0.137087	Heterogeneous nuclear ribonucleoprotein H/F, putative
TcCLB.509149.60	Q4D167	-1.37881	0.120563	60S ribosomal protein L19, putative
TcCLB.503405.10	Q4CN04	-1.3813	0.0937909	Glutamine synthetase, putative
TcCLB.507723.130	Q4DQJ3	-1.38217	0.0975395	Eukaryotic translation initiation factor 3 subunit 8, putative
TcCLB.511237.10	Q4D7D2	-1.38231	0.0897867	Thimet oligopeptidase, putative
TcCLB.509003.10	Q4CW66	-1.38234	0.200525	Uncharacterized protein
TcCLB.508415.40	Q4D7Y8	-1.39635	0.0524633	ADP-ribosylation factor 1, putative
TcCLB.503801.20	Q4CYE4	-1.40115	0.0678745	40S ribosomal protein S26
TcCLB.508999.190	Q4E0D8	-1.40808	0.081006	Calpain-like cysteine peptidase, putative
TcCLB.511909.40	Q4D4X1	-1.40971	0.0978187	Succinate dehydrogenase [ubiquinone] flavoprotein subunit, mitochondrial
TcCLB.510719.60	Q4DXV2	-1.41052	0.335857	Biotin/lipoate protein ligase, putative
TcCLB.507515.10	Q4DJ86	-1.41822	0.0553567	Glutathione peroxidase
TcCLB.506977.49	Q4DBY4	-1.42217	0.267365	Ribosomal proteins L36, putative
TcCLB.507389.70	Q4D0I5	-1.42786	0.151944	Peptidase, putative
TcCLB.508707.200	Q4E256	-1.42883	0.061953	Nucleoside diphosphate kinase
TcCLB.509213.40	Q4DGY4	-1.43703	0.0650343	Uncharacterized protein
TcCLB.503749.5	Q4CVK6	-1.44701	0.131868	Pyrroline-5-carboxylate synthetase-like protein, putative (Fragment)
TcCLB.506595.149	Q4DLB9	-1.44759	0.164495	Retrotransposon hot spot (RHS) protein, putative (Fragment)
TcCLB.511385.30	Q4DKH4	-1.45358	0.0647691	Vacuolar-type proton translocating pyrophosphatase 1, putative
TcCLB.504069.56	Q4DAV9	-1.45878	0.0916013	60S ribosomal protein L37a, putative
TcCLB.507641.160	Q4DYQ9	-1.46281	0.103713	Uncharacterized protein
TcCLB.509125.20	Q4CRW0	-1.47827	0.145032	ATP-dependent Clp protease subunit, heat shock protein 78, putative (Fragment)
TcCLB.511707.39	Q4CS64	-1.48228	0.268483	Uncharacterized protein (Fragment)
TcCLB.506581.30	Q4CY21	-1.48778	0.201724	Eukaryotic translation initiation factor 3 (EIF-3) interacting protein, putative
TcCLB.506815.30	Q4CV82	-1.48801	0.101494	Coatomer subunit beta'
TcCLB.510797.30	Q4CYI1	-1.48872	0.190697	Uncharacterized protein
TcCLB.505843.24	Q4CVH2	-1.49029	0.289746	Succinate dehydrogenase, putative
TcCLB.510685.10	Q4CPZ0	-1.49435	0.190283	Calreticulin, putative
TcCLB.508993.10	Q4CP83	-1.49821	0.268693	CTP synthase (Fragment)
TcCLB.511667.20	Q4DNM2	-1.49913	0.0884081	Retrotransposon hot spot (RHS) protein, putative
TcCLB.509259.160	Q4DM59	-1.5059	0.160497	Retrotransposon hot spot (RHS) protein, putative
TcCLB.503811.60	Q4D248	-1.50815	0.1892	Elongation factor Ts 1, mitochondrial
TcCLB.504089.50	Q4DE57	-1.51211	0.127173	Flagellar radial spoke component, putative
TcCLB.510609.20	Q4DJN0	-1.51942	0.213895	Uncharacterized protein
TcCLB.503971.10	Q4CY39	-1.52618	0.257895	Uncharacterized protein
TcCLB.507811.60	Q4DDN8	-1.52641	0.140498	Vesicle-associated membrane protein, putative
TcCLB.506629.40	Q4DQE0	-1.55752	0.134957	Uncharacterized protein
TcCLB.506963.14	Q4DN73	-1.56544	0.229881	40S ribosomal protein S27, putative
TcCLB.510689.30	Q4D579	-1.56582	0.152729	Proteasome subunit beta
TcCLB.509831.36	Q4D0R4	-1.56678	0.139318	Mitochondrial RNA binding protein 1, putative
TcCLB.509065.160	Q4DHE0	-1.59253	0.167273	Eukaryotic translation initiation factor 3 subunit 7-like protein, putative
	#These identifications were filtered out by the L-stringency and so deserve further experimentation to verify if they are indeed differentially expressed
TcCLB.511003.190	Q4DNT1	5.24557	0.00227467	Uncharacterized protein
TcCLB.508319.30	Q4D0V0	4.46097	0.00914394	Uncharacterized protein
TcCLB.508153.990	Q4E5Z8	3.49113	0.0128111	Uncharacterized protein
TcCLB.507017.20	Q4DFE4	3.46372	0.0294969	Leucine-rich repeat protein, putative
TcCLB.508375.60	Q4D3W1	3.42528	0.0154703	Uncharacterized protein
TcCLB.506295.160	Q4DEQ0	3.38471	0.0218786	2-oxoisovalerate dehydrogenase beta subunit, mitochondrial, putative
TcCLB.504827.130	Q4DNE1	3.37056	0.0358531	Uncharacterized protein
TcCLB.511289.14	Q4DD18	3.18498	0.0274616	Protein kinase, putative (Fragment)
TcCLB.506211.210	Q4DYJ7	3.0455	0.0270837	Protein kinase, putative
TcCLB.511727.160	Q4DY42	2.94401	0.0308068	Uncharacterized protein
TcCLB.507993.330	Q4E1U8	2.8107	0.00782581	Diphosphomevalonate decarboxylase
TcCLB.506795.90	Q4DA79	2.72532	0.0199521	Uncharacterized protein
TcCLB.510265.10	Q4DHH8	2.68996	0.0131303	Quinone oxidoreductase, putative
TcCLB.511421.50	Q4DWQ7	2.65707	0.0192725	Uncharacterized protein
TcCLB.506201.120	Q4DG77	2.58323	0.0123475	Uncharacterized protein
TcCLB.510877.60	Q4DPV3	2.4005	0.0276973	RuvB-like helicase
TcCLB.506167.40	Q4D5X3	2.08306	0.00466014	Proteasome subunit alpha type
TcCLB.509205.30	Q4D7F2	2.07959	0.0339737	Eukaryotic translation initiation factor 3 subunit E
TcCLB.506327.10	Q4DBH0	1.84533	0.0236604	Proteasome endopeptidase complex (Fragment)
TcCLB.511007.20	Q4D823	1.83509	0.0137364	Retrotransposon hot spot (RHS) protein, putative
TcCLB.503559.109	Q4DCB8	1.75548	0.0280639	Electron-transfer-flavoprotein, alpha polypeptide, putative
TcCLB.503677.10	Q4CSB0	1.74035	0.00169239	Mannose-6-phosphate isomerase
TcCLB.504213.80	Q4DIK8	1.69	0.0294073	Threonine synthase, putative
GMPR	Q4DFE7	1.5389	0.0313576	GMP reductase
TcCLB.506211.200	Q4DYJ8	1.48365	0.00214087	Aminopeptidase, putative
TcCLB.508625.130	Q4DBR3	1.45997	0.0257769	Stress-inducible protein STI1-like, putative
TcCLB.505171.60	Q4D905	-1.35424	0.0208212	Uncharacterized protein
TcCLB.510325.69	Q4CXX8	-1.43857	0.00460034	Aminopeptidase, putative (Fragment)
TcCLB.511729.60	Q4CVX7	-1.46361	0.0192572	Uncharacterized protein
TcCLB.504105.94	Q4DTX6	-1.55824	0.0166271	Ribosomal protein S25, putative
TcCLB.509047.40	Q4D6D8	-1.63273	0.0242757	Uncharacterized protein
TcCLB.484311.10	Q4CLF8	-1.64631	0.00358427	Calpain-like cysteine peptidase, putative (Fragment)
TcCLB.511229.80	Q4D452	-1.64743	0.00219048	Eukaryotic translation initiation factor 3 subunit I
TcCLB.510101.30	Q4E3Q5	-1.65532	0.0242689	60S ribosomal protein L28, putative
TcCLB.503819.30	Q4CPV7	-1.66145	0.0152367	Eukaryotic translation initiation factor 2 subunit, putative
TcCLB.506933.60	Q4DCA9	-1.80793	0.0223581	Mitochondrial RNA binding protein, putative
TcCLB.506863.10	Q4D747	-1.92272	0.0286355	Alanine--tRNA ligase
TcCLB.508445.20	Q4D4J5	-1.94397	0.0191934	Superoxide dismutase
TcCLB.506147.190	Q4DT88	-1.94652	0.0353046	Uncharacterized protein
TcCLB.511825.220	Q4DQ33	-1.98117	0.0156176	Alanine--tRNA ligase
TcCLB.504105.20	Q4DZB0	-2.05841	0.0251869	Eukaryotic translation initiation factor 5, putative
TcCLB.509911.90	Q4DFP8	-2.0847	0.00452398	Peptidase, putative
TcCLB.511855.20	Q4D6K0	-2.26041	0.00646735	Ubiquitin-like protein, putative
TcCLB.506481.20	Q4CZY9	-2.27092	0.00192851	Uncharacterized protein
TcCLB.506315.100	Q4D795	-2.32304	0.0261836	Protein phosphatase 2C, putative
TcCLB.508441.10	Q4DB82	-2.368	0.0350006	NUP-1 protein, putative (Fragment)
TcCLB.510313.20	Q4CLT8	-2.44389	0.0224892	Uncharacterized protein (Fragment)
TcCLB.506737.70	Q4DGS4	-2.45331	0.00419638	Ubiquitin-like protein, putative
TcCLB.505647.40	Q4CQG3	-2.50796	0.0180195	Endoribonuclease L-PSP (Pb5), putative
TcCLB.506885.70	Q4E4I9	-2.63819	0.00718202	Polyadenylate-binding protein
TcCLB.508231.190	Q4DW56	-2.70784	0.0165792	ABC transporter, putative
TcCLB.510741.229	Q4DRK7	-2.71462	0.0299147	Ubiquitin-activating enzyme E1, putative (Fragment)
TcCLB.509167.100	Q4DQQ7	-2.8909	0.0335497	Valyl-tRNA synthetase, putative
TcCLB.511825.200	Q4DQ35	-2.96116	0.0111399	40S ribosomal protein L14, putative
TcCLB.508837.80	Q4DUG1	-2.98248	0.00952342	Uncharacterized protein
TcCLB.504163.110	Q4D4R3	-2.98472	0.0194138	N-acetyltransferase subunit Nat1, putative
TcCLB.508373.10	Q4CSV9	-3.02711	0.0156275	Glutamine dependent carbamoyl-phosphate synthase, putative (Fragment)
TcCLB.511033.29	Q4CS68	-3.05558	0.0171894	Uncharacterized protein (Fragment)
TcCLB.509013.10	Q4CW02	-3.07041	0.0277093	Calpain-like cysteine peptidase, putative (Fragment)
TcCLB.507615.73	Q4DN30	-3.0881	0.0222584	Uncharacterized protein
TcCLB.511015.20	Q4CMS5	-3.19014	0.0250749	Ribosomal protein S29, putative
TcCLB.503899.110	Q4DEJ6	-3.20742	0.00469141	Glutathione peroxidase
RPL18	Q4DZP2	-3.23643	0.0189546	60S ribosomal protein L18
TcCLB.508303.4	Q4DE00	-3.30251	0.00513926	Ubiquitin-conjugating enzyme E2, putative
TcCLB.511421.200	Q4DWP4	-3.30976	0.0177409	Uncharacterized protein
TcCLB.506989.210	Q4DW87	-3.45696	0.0100958	U-box domain protein, putative
TcCLB.506297.290	Q4E0P0	-3.46674	0.00654712	Protein transport protein sec31, putative
TcCLB.511233.7	Q4DN74	-3.54769	0.0361539	60S ribosomal protein L10a, putative (Fragment)
TcCLB.506407.80	Q4DCV5	-3.5624	0.00464916	Uncharacterized protein
TcCLB.506195.190	Q4DXK7	-3.58562	0.010737	Uncharacterized protein
TcCLB.511367.170	Q4DYH5	-3.61181	0.0204282	Vacuolar protein sorting-associated protein 35
TcCLB.506413.20	Q4CXV7	-3.76918	0.00878244	40S ribosomal protein S33, putative
TcCLB.509597.20	Q4CVY4	-3.7959	0.00105148	Carbonic anhydrase-like protein, putative
TcCLB.503395.40	Q4CSL2	-3.81208	0.0085653	60S ribosomal protein L18, putative
TcCLB.504505.20	Q4CQM8	-3.81382	0.0355161	Retrotransposon hot spot (RHS) protein, putative
TcCLB.508995.40	Q4D9R1	-3.91028	0.0014818	Vesicle-fusing ATPase, putative
TcCLB.509683.10	Q4DLU4	-4.06149	0.0294404	Uncharacterized protein
TcCLB.510683.20	Q4CNI4	-4.32287	0.0208604	Uncharacterized protein
TcCLB.506885.350	Q4E4G8	-4.56023	0.0211673	Proteasome subunit alpha type
TcCLB.510309.50	Q4D4B8	-4.72687	0.015527	60S acidic ribosomal protein P2, putative
TcCLB.503575.34	Q4D205	-4.77179	0.00601631	Ribosomal protein L38, putative
TcCLB.509351.4	Q4CM76	-4.79209	0.0104828	Ribosomal protein L38, putative
TcCLB.510661.19	Q4DUI8	-4.84816	0.0109167	Ubiquitin-activating enzyme E1, putative (Fragment)
TcCLB.468941.9	Q4CKM6	-4.94848	0.00370279	ATP-dependent DEAD/H RNA helicase, putative (Fragment)
TcCLB.504099.10	Q4DBD1	-5.6598	0.0135267	Retrotransposon hot spot (RHS) protein, putative
TcCLB.509167.140	Q4DQQ3	-6.02571	0.00167493	Uncharacterized protein

## Sheet: Pt-dppf-mpo unique sol prot
Pt-dppf-mpo unique soluble proteins (ONLY CONTROL)
Gene ID	Uniprot ID	Replicate Count	Total Signal	Description
TcCLB.507483.50	Q4D137	3	85	Calmodulin
TcCLB.509647.13	Q4DPB6	3	71	Uncharacterized protein (Fragment)
TcCLB.504089.60	Q4DE55	3	69	Uncharacterized protein
TcCLB.485683.10	Q4CL38	3	51	Uncharacterized protein
TcCLB.506691.14	Q4D976	3	49	ATP-dependent DEAD/H RNA helicase, putative (Fragment)
TcCLB.509563.50	Q4D006	3	45	Uncharacterized protein
TcCLB.508689.20	Q4CUG4	3	44	Eukaryotic translation initiation factor 3 subunit G
TcCLB.503897.20	Q4DKP3	3	39	Uncharacterized protein
TcCLB.507649.80	Q4DHV9	3	38	Nucleolar RNA-binding protein, putative
TcCLB.503999.50	Q4D439	3	37	Ubiquitin-conjugating enzyme-like, putative
TcCLB.506697.80	Q4D391	3	36	Uncharacterized protein (Fragment)
TcCLB.509165.40	Q4CVQ4	3	35	60S acidic ribosomal protein P2 beta (H6.4), putative
TcCLB.507681.210	Q4DW33	3	35	Uncharacterized protein
TcCLB.506559.550	Q4E573	3	35	Uncharacterized protein
TcCLB.510911.10	Q4CZF5	3	35	Profilin
TcCLB.508119.144	Q4DQ60	3	32	Ribosomal protein L38, putative
TcCLB.509049.40	Q4CTB4	3	31	Uncharacterized protein
TcCLB.506579.10	Q4DAY6	3	30	ABC transporter, putative
TcCLB.503999.30	Q4DGD9	3	30	Uncharacterized protein
TcCLB.506239.30	Q4D030	3	30	Lectin, putative
TcCLB.510101.350	Q4E3M6	3	30	Uncharacterized protein
TcCLB.506605.59	Q4DUX5	3	30	Adenosine 5'-monophosphoramidase, putative
TcCLB.509693.80	Q4DRC3	3	29	Hypoxanthine-guanine phosphoribosyltransferase, putative
TcCLB.507969.10	Q4D546	2	29	Vesicular transport-associated repeat protein, putative
TcCLB.507765.130	Q4DFT9	3	28	Uncharacterized protein
TcCLB.508739.90	Q4DNH1	3	28	Uncharacterized protein
TcCLB.509671.10	Q4DK03	3	27	Uncharacterized protein
TcCLB.503479.70	Q4D6Z0	3	26	Uncharacterized protein
TcCLB.510649.24	Q4CR38	3	26	Membrane associated protein, putative (Fragment)
TcCLB.508647.110	Q4DV52	3	25	Uncharacterized protein
TcCLB.506779.50	Q4DHA9	3	24	Proteasome beta 3 subunit, putative
TcCLB.507585.10	Q4CPV4	2	24	Amino acid transporter, putative
TcCLB.510531.54	Q4DCM8	3	23	Small nuclear ribonucleoprotein, putative
TcCLB.507093.300	Q4E1M8	2	23	Uncharacterized protein
TcCLB.507077.50	Q4CW73	3	22	Uncharacterized protein
TcCLB.506145.40	Q4DAC4	3	22	Uncharacterized protein
TcCLB.504827.21	Q4DNF1	2	22	Uncharacterized protein (Fragment)
TcCLB.507241.39	Q4CWA4	2	22	ABC transporter, putative (Fragment)
TcCLB.457251.10	Q4CM68	3	21	3-oxo-5-alpha-steroid 4-dehydrogenase, putative (Fragment)
TcCLB.507795.10	Q4D094	3	21	Membrane associated protein, putative (Fragment)
TcCLB.511867.140	Q4DKQ2	3	21	Acyl carrier protein
TcCLB.506839.70	Q4DCU2	2	21	NADH dehydrogenase, putative
TcCLB.507053.100	Q4DTJ5	2	21	Ubiquitin hydrolase, putative
TcCLB.504703.20	Q4CXV9	2	21	Uncharacterized protein (Fragment)
TcCLB.511409.10	Q4D2A8	2	21	Uncharacterized protein
TcCLB.508347.120	Q4DSX2	3	20	Uncharacterized protein
TcCLB.506247.70	Q4E149	3	20	Nuclear pore complex protein (NUP155), putative
TcCLB.503395.50	Q4CSL1	2	20	40S ribosomal protein S12
TcCLB.506355.10	Q4DKD0	3	19	Hexose transporter, putative
TcCLB.511145.10	Q4D1H9	2	19	Cytochrome C oxidase subunit VI, putative
TcCLB.503581.39	Q4CU56	2	19	Coatomer subunit delta (Fragment)
TcCLB.510351.90	Q4D8Z1	3	18	Dihydrolipoamide acetyltransferase component of pyruvate dehydrogenase complex
TcCLB.506573.30	Q4D3K0	3	18	Tyrosyl or methionyl-tRNA synthetase, putative
TcCLB.510687.149	Q4D9X2	3	18	Coatomer alpha subunit, putative (Fragment)
TcCLB.511529.68	Q4DMY8	3	18	Cyclin-dependent kinases regulatory subunit
TcCLB.511189.80	Q4D851	3	18	Small nuclear ribonucleoprotein SmD2, putative
TcCLB.509611.160	Q4DK90	3	18	Proteasome regulatory non-ATPase subunit, putative
TcCLB.511385.14	Q4DKH5	3	18	Uncharacterized protein (Fragment)
TcCLB.506753.110	Q4DLY0	3	18	Cytochrome b5-like, putative
TcCLB.503681.9	Q4CR94	2	18	Uncharacterized protein (Fragment)
TcCLB.508257.150	Q4DX43	3	17	Small nuclear ribonucleoprotein SmD3, putative
TcCLB.504069.20	Q4DAW5	2	17	Cytochrome C oxidase subunit VI, putative
TcCLB.511165.50	Q4D5E3	2	17	Uncharacterized protein
TcCLB.511809.90	Q4DGZ9	2	17	Uncharacterized protein
TcCLB.506773.20	Q4DQG1	3	16	Uncharacterized protein
TcCLB.504017.10	Q4D103	2	16	Nascent polypeptide-associated complex subunit beta
TcCLB.510767.10	Q4CTG9	2	16	Ribosomal protein L15
TcCLB.505073.10	Q4CV90	2	16	Uncharacterized protein
TcCLB.508461.10	Q4E4W4	2	16	Uncharacterized protein
TcCLB.510565.179	Q4DPF2	2	16	Uncharacterized protein (Fragment)
TcCLB.511483.40	Q4D554	3	15	Prefoldin subunit 2, putative
TcCLB.509695.90	Q4DTR0	3	15	Uncharacterized protein
TcCLB.510771.9	Q4CWT0	3	15	Uncharacterized protein (Fragment)
TcCLB.511381.60	Q4D131	3	15	Uncharacterized protein
TcCLB.510861.14	Q4DPH9	2	15	Uncharacterized protein (Fragment)
TcCLB.508879.80	Q4DXE8	2	15	Uncharacterized protein
TcCLB.510519.149	Q4DEA1	2	15	Uncharacterized protein (Fragment)
TcCLB.508405.30	Q4D5H3	2	15	Phosphatase-like protein, putative
TcCLB.506825.210	Q4DZE2	3	14	Uncharacterized protein
TcCLB.507511.40	Q4D3H6	3	14	Uncharacterized protein
TcCLB.424123.20	Q4CP97	3	14	Uncharacterized protein
TcCLB.506517.149	Q4DDA3	2	14	Uncharacterized protein
TcCLB.511907.200	Q4DY71	2	14	Cysteine peptidase inhibitor, putative
TcCLB.511807.200	Q4E1C5	2	14	Uncharacterized protein
TcCLB.510357.130	Q4DBV1	2	14	Uncharacterized protein
TcCLB.507649.20	Q4DHW4	2	14	Uncharacterized protein
TcCLB.508045.70	Q4DIN9	2	14	Uncharacterized protein
TcCLB.506435.150	Q4E318	3	13	Uncharacterized protein
TcCLB.507817.80	Q4D0J3	2	13	5'-3' exonuclease XNRA, putative (Fragment)
TcCLB.508307.170	Q4DRX6	2	13	Ribosome assembly factor mrt4
TcCLB.510409.39	Q4D1T6	2	13	Ubiquitin/ribosomal protein S27a, putative
TcCLB.508241.130	Q4DG22	2	13	Uncharacterized protein
TcCLB.509965.250	Q4E0T5	2	13	Ubiquitin fusion degradation protein 2, putative
TcCLB.510575.180	Q4DLV1	2	13	Adenylate kinase, putative
TcCLB.506211.240	Q4DYJ4	2	13	Clathrin light chain
TcCLB.508601.100	Q4DBQ1	3	12	Uncharacterized protein
TcCLB.508323.60	Q4DQ49	2	12	Centrin, putative
TcCLB.506577.120	Q4DR82	2	12	Sterol C-24 reductase, putative
TcCLB.511807.190	Q4E1C6	2	12	Uncharacterized protein
TcCLB.507927.100	Q4D582	2	12	Uncharacterized protein
TcCLB.505943.40	Q4DMM2	2	12	Uncharacterized protein
TcCLB.506945.240	Q4DX76	2	12	ATP synthase, epsilon chain, putative
TcCLB.509721.30	Q4D1I5	2	12	Uncharacterized protein
TcCLB.508299.70	Q4D9G7	2	12	Peroxisome targeting signal 1 receptor, putative
TcCLB.506633.90	Q4D8Q4	2	12	Folate/pteridine transporter, putative
TcCLB.507519.140	Q4DNZ4	2	12	Adenine phosphoribosyltransferase, putative
TcCLB.503793.10	Q4CMR4	3	11	2-oxoglutarate dehydrogenase subunit, putative (Fragment)
TcCLB.506177.10	Q4DHU1	3	11	Uncharacterized protein
TcCLB.506753.230	Q4DLW7	2	11	Uncharacterized protein
TcCLB.510307.330	Q4E0M6	2	11	Dispersed gene family protein 1 (DGF-1), putative
TcCLB.508397.10	Q4D3E6	2	11	Vacuolar ATP synthase, putative
TcCLB.508507.50	Q4CZP5	2	11	Uncharacterized protein
TcCLB.511535.20	Q4CTW7	2	10	Uncharacterized protein
TcCLB.509627.40	Q4CY99	2	10	Uncharacterized protein
TcCLB.509837.10	Q4CVB2	2	10	Uncharacterized protein
TcCLB.511313.40	Q4D1V0	2	10	ATP-dependent RNA helicase, putative (Fragment)
TcCLB.506203.129	Q4DN02	2	10	Mitochondrial DNA-directed RNA polymerase, putative (Fragment)
TcCLB.508879.30	Q4DXF3	2	10	Dynein heavy chain, putative
TcCLB.511287.150	Q4DIZ5	2	10	Fibrillarin, putative
TcCLB.510315.10	Q4CRT0	2	10	Inosine-adenosine-guanosine-nucleoside hydrolase, putative
TcCLB.506829.100	Q4DD92	2	10	Fatty acyl CoA syntetase 1, putative
TcCLB.509033.100	Q4D9F6	2	10	Uncharacterized protein
TcCLB.511717.170	Q4DJU4	2	9	ATP-dependent zinc metallopeptidase, putative
TcCLB.510155.70	Q4E0G9	2	9	Heat shock protein 70 (HSP70), putative
TcCLB.506211.114	Q4DYK7	2	9	Kinesin-like protein
TcCLB.508277.370	Q4E0W1	2	9	DNA topoisomerase 2
TcCLB.510607.80	Q4DHR5	2	9	Dispersed gene family protein 1 (DGF-1), putative
TcCLB.508831.120	Q4DX16	2	9	Acetyltransferase, putative
TcCLB.508257.170	Q4DX41	2	9	Dynein heavy chain, putative
TcCLB.508651.20	Q4CLQ9	2	9	Cytochrome c oxidase subunit 10, putative
TcCLB.510943.80	Q4DRT5	2	9	ABC transporter, putative
TcCLB.504427.140	Q4DYM9	2	9	Uncharacterized protein
TcCLB.507601.10	Q4DDM9	2	9	Serine/threonine-protein phosphatase
TcCLB.510285.20	Q4DIT5	2	9	Uncharacterized protein
TcCLB.508153.164	Q4E675	2	9	Uncharacterized protein
TcCLB.507583.20	Q4CX97	2	9	Nucleolar protein, putative
TcCLB.508173.180	Q4DV68	2	8	Nuclear transport factor 2 protein(NFT2), putative
TcCLB.508699.20	Q4DE52	2	8	Uncharacterized protein
TcCLB.510861.40	Q4DPH7	2	8	Uncharacterized protein
TcCLB.508153.330	Q4E658	2	8	Katanin-like protein, putative
TcCLB.506465.14	Q4D6M6	2	8	Uncharacterized protein
TcCLB.510149.120	Q4DHQ3	2	8	Flagellar radial spoke protein-like, putative
TcCLB.510329.170	Q4E3J6	2	8	Uncharacterized protein
TcCLB.507897.30	Q4CXF6	2	8	Serine/threonine-protein kinase A, putative
TcCLB.503513.40	Q4CSX0	2	8	Proteasome regulatory non-ATPase subunit 6, putative (Fragment)
TcCLB.508895.80	Q4DCC4	2	8	Intraflagellar transport protein component, putative
TcCLB.509445.30	Q4CR19	2	8	Farnesyl synthetase, putative
TcCLB.510885.160	Q4DP43	2	8	Uncharacterized protein
TcCLB.509767.70	Q4DSC7	2	8	V-type proton ATPase subunit a
TcCLB.506559.300	Q4E5A0	2	7	G-actin binding protein, putative
TcCLB.510655.30	Q4DFY7	2	7	Helicase, putative
TcCLB.506327.90	Q4DBG2	2	7	Serine/threonine protein kinase, putative
TcCLB.507807.10	Q4CY33	2	7	Uncharacterized protein (Fragment)
TcCLB.511823.79	Q4CXZ7	2	7	Uncharacterized protein (Fragment)
TcCLB.504867.20	Q4DEI4	2	7	ABC transporter, putative
TcCLB.507771.90	Q4DCL3	2	7	Uncharacterized protein
TcCLB.509805.60	Q4E002	2	6	Ras-related protein rab-5, putative
TcCLB.511807.290	Q4E1B5	2	6	Uncharacterized protein
TcCLB.510431.220	Q4DXX2	2	6	Uncharacterized protein
TcCLB.506989.160	Q4DW91	2	6	Peroxisomal targeting signal type 2 receptor, putative
TcCLB.511725.180	Q4DWH2	2	6	Dynein, putative
TcCLB.503899.80	Q4DEJ9	2	6	Uncharacterized protein
TcCLB.507003.60	Q4CXM2	2	6	Uncharacterized protein
TcCLB.507929.10	Q4CPP1	2	5	Kinesin, putative (Fragment)
TcCLB.509693.170	Q4DRB4	2	4	Uncharacterized protein
TcCLB.506829.90	Q4DD93	2	4	Uncharacterized protein
TcCLB.510099.20	Q4DAF0	2	4	Uncharacterized protein
Pt-dppf-mpo unique soluble proteins (ONLY TREATED)
Gene ID	Uniprot ID	Replicate Count	Total Signal	Description
TcCLB.506193.60	Q4D2P4	3	24	Ascorbate-dependent peroxidase, putative
TcCLB.511817.40	Q4DYC3	3	22	NADH-cytochrome b5 reductase
TcCLB.504109.90	Q4DR39	3	20	Ubiquitin carboxyl-terminal hydrolase
TcCLB.511211.110	Q4DTN4	3	18	Uncharacterized protein
TcCLB.506945.190	Q4DX81	3	18	Cytochrome p450-like protein, putative
TcCLB.508299.20	Q4D9H2	3	17	Uncharacterized protein
TcCLB.503991.10	Q4CQY4	3	15	Uncharacterized protein
TcCLB.509551.70	Q4DJJ4	3	10	Uncharacterized protein
TcCLB.506139.200	Q4DT27	2	17	Retrotransposon hot spot (RHS) protein, putative
TcCLB.506931.20	Q4D2M5	2	15	Uncharacterized protein
TcCLB.507001.80	Q4DF20	2	14	Acyl-CoA dehydrogenase, putative
TcCLB.508465.110	Q4DHU6	2	13	Acyl-CoA dehydrogenase, putative
TcCLB.503745.30	Q4CRX7	2	13	Ascorbate-dependent peroxidase, putative
TcCLB.511511.170	Q4DT66	2	13	ADP-ribosylation factor-like protein, putative
TcCLB.509937.20	Q4DSR2	2	13	ATP-dependent (S)-NAD(P)H-hydrate dehydratase
TcCLB.507801.179	Q4DPK8	2	13	Vesicle-associated membrane protein, putative
TcCLB.506795.44	Q4DA84	2	12	ATP-dependent (S)-NAD(P)H-hydrate dehydratase
TcCLB.511277.210	Q4E5H2	2	12	Peroxisomal enoyl-coa hydratase, putative
TcCLB.508719.40	Q4D3G0	2	11	Kinetoplast DNA-associated protein, putative
TcCLB.509261.10	Q4CTQ5	2	10	p-nitrophenylphosphatase, putative
TcCLB.508215.9	Q4CS72	2	10	Protein kinase C substrate protein, heavy chain, putative
TcCLB.511211.220	Q4DTM3	2	10	Heat shock protein 70, putative
TcCLB.508999.220	Q4E0D6	2	9	Calpain cysteine peptidase, putative
TcCLB.509791.140	Q4DNI3	2	9	Uncharacterized protein
TcCLB.504033.90	Q4DR73	2	8	Mitochondrial carrier protein, putative
TcCLB.504427.260	Q4DYM0	2	8	Kinesin-like protein
TcCLB.506865.50	Q4D5Q2	2	8	Uncharacterized protein
TcCLB.510955.40	Q4CZ83	2	8	Axoneme central apparatus protein, putative
TcCLB.506835.10	Q4DGQ4	2	8	Uncharacterized protein
TcCLB.511901.30	Q4CRB4	2	7	Uncharacterized protein
TcCLB.511859.70	Q4DLQ5	2	7	Uncharacterized protein
TcCLB.509859.80	Q4D4X6	2	7	Coronin
TcCLB.510879.210	Q4DJW2	2	5	Uncharacterized protein
TcCLB.508897.110	Q4D932	2	5	Peptidylprolyl isomerase
TcCLB.509671.110	Q4DJZ1	2	5	Uncharacterized protein
TcCLB.511727.300	Q4DY29	2	5	GDP-L-fucose synthetase, putative

## Sheet: Pt-dppf-mpo insol prot detected
Pt-dppf-mpo insoluble protein detected
Gene ID	Uniprot ID	Fold Change	pValue	Description
#Identifications satisfied both, the automatic fold and statistical criteria.
TcCLB.509797.40	Q4D2F2	4.66293	0.000135059	Isoleucyl-tRNA synthetase, putative
TcCLB.510215.10	Q4CMU8	4.15654	0.0379928	NADH-dependent fumarate reductase, putative
TcCLB.468941.9	Q4CKM6	3.60594	0.034028	ATP-dependent DEAD/H RNA helicase, putative (Fragment)
TcCLB.503467.9	Q4CQU6	3.48847	0.0229997	NADH-dependent fumarate reductase, putative (Fragment)
TcCLB.511003.30	Q4DNU7	3.43471	0.0187195	Uncharacterized protein
TcCLB.508153.1050	Q4E5Z1	3.38825	0.0127267	Uncharacterized protein
TcCLB.503849.60	Q4D779	3.26794	0.0316878	NADH-dependent fumarate reductase, putative
TcCLB.511825.200	Q4DQ35	2.94267	0.0326408	40S ribosomal protein L14, putative
TcCLB.506493.80	Q4DE64	2.9348	0.00753094	DNA topoisomerase IA, putative
TcCLB.506481.20	Q4CZY9	2.8843	0.0041801	Uncharacterized protein
TcCLB.511421.200	Q4DWP4	2.86572	0.0147264	Uncharacterized protein
TcCLB.508277.370	Q4E0W1	2.85046	0.0158257	DNA topoisomerase 2
TcCLB.511807.190	Q4E1C6	2.67287	0.00733813	Uncharacterized protein
TcCLB.506445.60	Q4DHG5	2.6378	0.0243233	DNA topoisomerase 2
TcCLB.506945.20	Q4DX96	2.54039	0.0123795	Phosphoglycerate kinase
TcCLB.509219.20	Q4CXQ1	2.50268	0.0112341	Retrotransposon hot spot (RHS) protein, putative
TcCLB.511295.50	Q4D7R8	2.3714	0.0122067	Uncharacterized protein
#These identifications satisfied the fold criteria but, most likely, this happened by chance (should be disconsidered).
TcCLB.506625.70	Q4DUD5	4.6055	0.00384543	RNA-binding protein, putative
TcCLB.510313.20	Q4CLT8	3.7434	0.00621188	Uncharacterized protein (Fragment)
TcCLB.506625.60	Q4DUD6	3.72433	0.0500064	Inositol 5-phosphatase 1, putative
TcCLB.509065.90	Q4DHE8	3.37627	0.00574576	Uncharacterized protein
TcCLB.510301.10	Q4D0Q1	3.05808	0.00391332	Fructose-bisphosphate aldolase (Fragment)
TcCLB.504069.90	Q4DAV5	3.01435	0.00721098	Centromere/microtubule binding protein cbf5, putative
TcCLB.510759.10	Q4DS92	2.73173	0.00706769	Uncharacterized protein
TcCLB.509901.170	Q4DDS8	2.19048	0.00600419	DNA-(apurinic or apyrimidinic site) lyase (Fragment)
TcCLB.510187.160	Q4E4D5	2.12707	0.00584764	Developmentally regulated GTP-binding protein, putative
TcCLB.506943.80	Q4DCN7	1.8463	0.00318806	Uncharacterized protein
TcCLB.504005.54	Q4CY42	-5.68618	0.0676798	Uncharacterized protein
#These identifications did not meet the fold and p-value criteria. (should be disconsidered)
TcCLB.507089.270	Q4DWL8	2.82911	0.105614	Dihydrolipoyl dehydrogenase
TcCLB.506885.14	Q4DXW6	2.6735	0.0525197	Ribosomal protein L37
TcCLB.509611.80	Q4DK98	2.59109	0.141068	Cation-transporting ATPase
TcCLB.506945.190	Q4DX81	2.35972	0.0288644	Cytochrome p450-like protein, putative
TcCLB.503829.80	Q4D1S8	2.32639	0.0548339	Uncharacterized protein
TcCLB.506127.110	Q4DP89	2.32615	0.0321658	Eukaryotic peptide chain release factor subunit 1, putative
TcCLB.511439.40	Q4DAP5	2.31393	0.0338227	Uncharacterized protein
TcCLB.507681.210	Q4DW33	2.28636	0.0274523	Uncharacterized protein
TcCLB.509395.100	Q4DJQ7	2.28307	0.0361505	Cytochrome b-domain protein, putative
TcCLB.503477.20	Q4CUD7	2.27928	0.0496164	Transaldolase
TcCLB.509287.50	Q4E0B2	2.27841	0.0697045	Glucose-6-phosphate 1-dehydrogenase
TcCLB.509917.19	Q4CRM5	2.24926	0.0368881	Retrotransposon hot spot (RHS) protein, putative (Fragment)
TcCLB.511037.20	Q4CVQ1	2.22907	0.0355394	Uncharacterized protein
TcCLB.508707.200	Q4E256	2.22041	0.0579654	Nucleoside diphosphate kinase
TcCLB.506959.30	Q4DIE1	2.20973	0.0668564	ATP-dependent DEAD/H RNA helicase, putative
TcCLB.510163.20	Q4CXW2	2.20181	0.0928533	Elongation factor 1-gamma (EF-1-gamma), putative
TcCLB.509649.50	Q4CYA4	2.194	0.0668573	Uncharacterized protein
TcCLB.508153.280	Q4E661	2.19326	0.0295405	60S ribosomal protein L13
TcCLB.510761.44	Q4DG41	2.1805	0.0879765	Cyclophilin-like protein, putative
TcCLB.507831.60	Q4DI67	2.17761	0.0571792	Heat shock protein, putative
TcCLB.510723.29	Q4CPC1	2.17472	0.110617	1-acyl-sn-glycerol-3-phosphate acyltransferase, putative (Fragment)
TcCLB.506943.4	Q4DCP7	2.1719	0.0272466	Aldehyde dehydrogenase, putative (Fragment)
TcCLB.506983.39	Q4CYU3	2.16206	0.0440853	Calpain-like cysteine peptidase, putative
TcCLB.507765.149	Q4DFT7	2.15239	0.0555854	Uncharacterized protein (Fragment)
TcCLB.506829.110	Q4DD91	2.13904	0.0571128	Fatty acyl CoA synthetase 2, putative
TcCLB.510679.40	Q4CYC6	2.13651	0.0756336	Uncharacterized protein
TcCLB.509777.70	Q4DIM7	2.1329	0.0514205	Calcium-transporting ATPase
TcCLB.510571.30	Q4CYQ8	2.13287	0.152152	Actin, putative
TcCLB.508813.60	Q4D6Y1	2.12944	0.0306247	Uncharacterized protein
TcCLB.507083.30	Q4DPN0	2.12806	0.0823359	DNA-(apurinic or apyrimidinic site) lyase
TcCLB.503681.9	Q4CR94	2.10648	0.017393	Uncharacterized protein (Fragment)
TcCLB.511115.30	Q4CXN8	2.09413	0.169673	Uncharacterized protein
TcCLB.508911.10	Q4D889	2.08998	0.11457	Uncharacterized protein (Fragment)
TcCLB.509895.20	Q4DCY2	2.0894	0.0530254	Uncharacterized protein
TcCLB.508919.140	Q4DL69	2.07875	0.0478795	Uncharacterized protein
TcCLB.511527.70	Q4D5J9	2.06655	0.068699	Myosin heavy chain, putative
TcCLB.509153.90	Q4DLS1	2.06632	0.051967	Bifunctional dihydrofolate reductase-thymidylate synthase
TcCLB.510761.14	Q4DG45	2.06623	0.0193112	60S ribosomal protein L26, putative
TcCLB.504163.50	Q4D4R9	2.06521	0.0308509	Fructose-bisphosphate aldolase
TcCLB.508241.10	Q4DG35	2.06001	0.0140081	Glycerol-3-phosphate dehydrogenase, putative (Fragment)
TcCLB.457251.10	Q4CM68	2.04307	0.0284865	3-oxo-5-alpha-steroid 4-dehydrogenase, putative (Fragment)
TcCLB.510055.150	Q4DMM7	2.0414	0.127704	Uncharacterized protein
TcCLB.506249.70	Q4CX07	2.02581	0.0670003	ABC transporter, putative
TcCLB.509065.9	Q4DHF8	2.01717	0.0455282	Aldehyde dehydrogenase, putative (Fragment)
TcCLB.509239.10	Q4CKQ6	2.01471	0.0631812	Fatty acid desaturase, putative
TcCLB.508319.70	Q4D0U7	2.00393	0.0243643	40S ribosomal protein S11, putative
TcCLB.506367.30	Q4DFX2	1.99721	0.0290233	Uncharacterized protein
TcCLB.511585.190	Q4E162	1.99246	0.0709486	Probable eukaryotic initiation factor 4A
TcCLB.508303.50	Q4DDZ4	1.99076	0.0127576	Uncharacterized protein
TcCLB.510409.39	Q4D1T6	1.98085	0.0333441	Ubiquitin/ribosomal protein S27a, putative
TcCLB.508675.29	Q4D066	1.97753	0.102114	Calpain-like cysteine peptidase, putative
TcCLB.507709.50	Q4DIV9	1.97539	0.0551482	60S ribosomal protein L6, putative
TcCLB.504153.280	Q4E2Q5	1.97265	0.0269549	Uncharacterized protein
TcCLB.507241.39	Q4CWA4	1.9691	0.0338636	ABC transporter, putative (Fragment)
TcCLB.511047.50	Q4D0B9	1.96253	0.0991606	Proteasome regulatory ATPase subunit 2, putative
TcCLB.508665.14	Q4CNM5	1.96226	0.0719733	ATP-dependent Clp protease subunit, heat shock protein 100 (HSP100), putative (Fragment)
TcCLB.504105.94	Q4DTX6	1.96207	0.0731807	Ribosomal protein S25, putative
TcCLB.507897.30	Q4CXF6	1.95636	0.15221	Serine/threonine-protein kinase A, putative
TcCLB.507951.270	Q4DUR6	1.94939	0.0374399	Uncharacterized protein
TcCLB.511807.200	Q4E1C5	1.94913	0.174366	Uncharacterized protein
TcCLB.511179.110	Q4DFA0	1.94243	0.0228065	Uncharacterized protein
TcCLB.503801.20	Q4CYE4	1.9369	0.0624101	40S ribosomal protein S26
TcCLB.507083.10	Q4DPN2	1.93358	0.0463092	Uncharacterized protein
TcCLB.506629.200	Q4DQC4	1.92487	0.0356499	Uncharacterized protein
TcCLB.504057.97	Q4DSE5	1.91893	0.0423531	Uncharacterized protein
TcCLB.410923.20	Q4CS11	1.91749	0.0146186	Retrotransposon hot spot (RHS) protein, putative
TcCLB.503715.30	Q4CZR0	1.91434	0.0434148	Small GTP-binding protein Rab1, putative
TcCLB.510003.20	Q4D3R4	1.91285	0.154766	Uncharacterized protein
TcCLB.511001.120	Q4DZ31	1.90248	0.0791485	60S ribosomal protein L18a
TcCLB.508153.400	Q4E650	1.90247	0.046893	Serine/threonine protein kinase, putative
TcCLB.506041.10	Q4CYQ4	1.89823	0.124525	Uncharacterized protein (Fragment)
TcCLB.506155.30	Q4DFG6	1.89754	0.0974846	Kinesin-like protein, putative
TcCLB.504003.60	Q4D1L5	1.89235	0.0949664	T-complex protein 1 subunit gamma
TcCLB.511293.90	Q4DDK6	1.88799	0.0854076	Uncharacterized protein
TcCLB.508541.220	Q4DN97	1.88663	0.0396221	Casein kinase, putative
TcCLB.508535.10	Q4CYX1	1.88398	0.119457	NADH-dependent fumarate reductase, putative
TcCLB.507305.20	Q4CQE6	1.88098	0.0590206	Casein kinase, putative
TcCLB.506649.20	Q4DE37	1.86581	0.0886686	Plasma membrane ATPase
TcCLB.510151.19	Q4CMH8	1.86547	0.0812335	Fatty acyl CoA syntetase 1, putative (Fragment)
TcCLB.508541.230	Q4DN94	1.86498	0.0595317	Casein kinase, putative
TcCLB.506357.130	Q4DY15	1.86337	0.0924008	Uncharacterized protein
TcCLB.511181.20	Q4DPR6	1.86076	0.0378661	Uncharacterized protein
TcCLB.511277.60	Q4E5I9	1.8576	0.0737366	Alcohol dehydrogenase, putative
TcCLB.506593.19	Q4CUC8	1.85639	0.0819197	Ribosomal protein S7, putative
TcCLB.504069.56	Q4DAV9	1.85558	0.134429	60S ribosomal protein L37a, putative
TcCLB.510101.330	Q4E3M8	1.85445	0.067071	Uncharacterized protein
TcCLB.507857.40	Q4D4E8	1.85075	0.190196	ATP-dependent RNA helicase, putative
TcCLB.508441.10	Q4DB82	1.84978	0.132098	NUP-1 protein, putative (Fragment)
TcCLB.510663.70	Q4D0X5	1.84823	0.04285	6-phosphogluconate dehydrogenase, decarboxylating
TcCLB.510007.70	Q4DBP0	1.8463	0.114961	ATP-dependent zinc metallopeptidase, putative
TcCLB.507923.10	Q4CU39	1.84579	0.0359035	L-threonine 3-dehydrogenase, putative
TcCLB.509499.14	Q4CX87	1.83705	0.0432999	Tryparedoxin peroxidase, putative
TcCLB.506579.10	Q4DAY6	1.83427	0.0934824	ABC transporter, putative
TcCLB.508475.10	Q4D6H7	1.83008	0.182522	Ribosomal protein S20, putative
TcCLB.506405.149	Q4DED2	1.82981	0.0882303	Ribosomal protein L21E (60S), putative
TcCLB.510299.20	Q4CZK6	1.82662	0.146378	Uncharacterized protein
TcCLB.511261.140	Q4DL18	1.82106	0.0455996	60S ribosomal protein L34, putative
TcCLB.507049.50	Q4DPX9	1.81772	0.188265	ABC transporter, putative
TcCLB.504033.80	Q4DR74	1.8175	0.202903	Uncharacterized protein
TcCLB.511529.210	Q4DMX4	1.81125	0.0488114	Uncharacterized protein
TcCLB.506443.150	Q4DME9	1.81043	0.0488235	Retrotransposon hot spot (RHS) protein, putative
TcCLB.511899.40	Q4CT37	1.8057	0.0566407	2-amino-3-ketobutyrate coenzyme A ligase, putative
TcCLB.507093.260	Q4E1N1	1.80177	0.0849659	ABC transporter, putative
TcCLB.508257.170	Q4DX41	1.78612	0.110011	Dynein heavy chain, putative
TcCLB.506247.220	Q4E133	1.78358	0.174267	Histidine ammonia-lyase
TcCLB.507081.130	Q4DGT6	1.77964	0.025233	Uncharacterized protein
TcCLB.508461.140	Q4E4V0	1.77442	0.116264	Polyadenylate-binding protein
TcCLB.508325.160	Q4E0I0	1.77282	0.0269488	Retrotransposon hot spot (RHS) protein, putative
TcCLB.506593.30	Q4CUC7	1.77045	0.10215	Ribosomal protein S7, putative
TcCLB.511151.90	Q4DC80	1.76309	0.072765	Glycerol-3-phosphate dehydrogenase
TcCLB.510575.200	Q4DLU9	1.75915	0.0770441	Chaperone DnaJ protein, putative
TcCLB.503689.4	Q4CV38	1.75785	0.110161	Rab1 small GTP-binding protein, putative
TcCLB.504121.39	Q4CQW1	1.75433	0.0916549	60S ribosomal protein L14, putative (Fragment)
TcCLB.508319.30	Q4D0V0	1.75215	0.062138	Uncharacterized protein
TcCLB.510879.110	Q4DJX1	1.74595	0.121662	Ribosomal protein L3, putative
TcCLB.511575.130	Q4DG60	1.74351	0.0866028	Folate/pteridine transporter, putative
TcCLB.506127.50	Q4DP94	1.7394	0.0274397	Uncharacterized protein
TcCLB.510381.10	Q4CYV4	1.7381	0.0718184	Cystathionine beta-synthase, putative
TcCLB.509793.40	Q4CY61	1.73421	0.19905	Kinetoplast DNA-associated protein, putative
TcCLB.479379.9	Q4CKF1	1.73369	0.104654	Dynein heavy chain, putative (Fragment)
TcCLB.508177.110	Q4DF38	1.73357	0.0632231	Cystathionine beta-synthase
TcCLB.509105.140	Q4DBM7	1.72982	0.124095	Heat shock protein 85, putative
TcCLB.508175.146	Q4E2Y1	1.72848	0.11267	60S ribosomal protein L23a, putative
TcCLB.508461.270	Q4E4T4	1.72799	0.0714056	Rab7 GTP binding protein, putative
TcCLB.509381.20	Q4CP93	1.72692	0.121669	40S ribosomal protein S15a, putative
TcCLB.511807.284	Q4E1B6	1.72309	0.0288698	Carnitine O-palmitoyltransferase II, putative
TcCLB.507873.20	Q4CVG8	1.72132	0.0758072	Cell differentiation protein, putative
TcCLB.508461.370	Q4E4S2	1.71972	0.132598	Uncharacterized protein
TcCLB.510395.10	Q4CNR6	1.71314	0.145896	ATP synthase, alpha chain, mitochondrial, putative (Fragment)
TcCLB.506313.10	Q4CMJ5	1.71268	0.0416236	Retrotransposon hot spot (RHS) protein, putative (Fragment)
TcCLB.510421.220	Q4DXR0	1.70679	0.0446013	Uncharacterized protein
TcCLB.507641.290	Q4DYP5	1.70531	0.109339	Chaperonin HSP60, mitochondrial
TcCLB.509379.20	Q4CQ17	1.70174	0.15054	Uncharacterized protein
TcCLB.510943.80	Q4DRT5	1.70021	0.0654597	ABC transporter, putative
TcCLB.511025.50	Q4DD39	1.69967	0.130839	Glucosamine-6-phosphate isomerase
TcCLB.506301.11	Q4D0L7	1.6985	0.08942	Heat shock protein, putative (Fragment)
TcCLB.506701.20	Q4CQX2	1.69661	0.168372	Uncharacterized protein
TcCLB.505763.19	Q4CQ52	1.69422	0.100119	Plasma membrane ATPase (Fragment)
TcCLB.511389.150	Q4DIT6	1.69342	0.243039	Thiolase protein-like protein, putative
TcCLB.506585.40	Q4D620	1.69104	0.113191	Glucose-regulated protein 78, putative
TcCLB.509589.20	Q4D1U2	1.68835	0.130885	Squalene monooxygenase, putative
TcCLB.507009.40	Q4DC09	1.68342	0.153472	Galactokinase, putative
TcCLB.508823.70	Q4D6I3	1.67235	0.119988	Uncharacterized protein
TcCLB.511043.30	Q4CXG2	1.67081	0.0562482	DnaJ chaperone protein, putative
TcCLB.508111.30	Q4D5C2	1.66928	0.117852	Glutamate dehydrogenase
TcCLB.506327.30	Q4DBG8	1.66853	0.0527465	Uncharacterized protein
TcCLB.507029.30	Q4CVR9	1.66813	0.114339	Heat shock 70 kDa protein, mitochondrial, putative
TcCLB.509213.100	Q4DGX8	1.66664	0.101077	Uncharacterized protein
TcCLB.508277.230	Q4E0X3	1.66391	0.0985302	Nucleolar RNA binding protein, putative
TcCLB.510835.40	Q4D531	1.66367	0.140858	60S ribosomal protein L7a, putative
TcCLB.511229.50	Q4D455	1.65506	0.129625	Adenosylhomocysteinase
TcCLB.506839.70	Q4DCU2	1.65343	0.106162	NADH dehydrogenase, putative
TcCLB.510431.160	Q4DXX8	1.65054	0.0687305	Nucleolar GTP-binding protein 1
TcCLB.509551.30	Q4DJJ9	1.64782	0.0774404	Mitochondrial phosphate transporter, putative
TcCLB.506155.10	Q4DFG8	1.64294	0.0422467	Uncharacterized protein
TcCLB.509067.70	Q4D112	1.63745	0.00903003	Pyrroline-5-carboxylate synthetase-like protein, putative (Fragment)
TcCLB.503453.30	Q4D8K4	1.6349	0.130221	60S ribosomal protein L30, putative
TcCLB.506167.20	Q4D5X5	1.63464	0.0744491	Uncharacterized protein
TcCLB.508611.30	Q4CPW7	1.6315	0.0429194	Surface protease GP63, putative
TcCLB.509671.64	Q4DJZ7	1.62997	0.107653	Ribosomal protein L36, putative
TcCLB.506297.330	Q4E0N6	1.62954	0.191177	40S ribosomal protein S15a, putative
TcCLB.509671.80	Q4CU61	1.62668	0.121776	60S ribosomal protein L5, putative
TcCLB.506959.120	Q4DIC9	1.62568	0.129021	60S ribosomal protein L30, putative
CYP51	Q7Z1V1	1.62459	0.138071	Sterol 14-alpha demethylase
TcCLB.504121.30	Q4CQW2	1.62367	0.133179	60S ribosomal protein L4, putative
TcCLB.511815.180	Q4DJ91	1.62203	0.0672943	Uncharacterized protein
TcCLB.511101.19	Q4CVW3	1.61763	0.0575284	Retrotransposon hot spot (RHS) protein, putative
TcCLB.503935.20	Q4CNP4	1.6175	0.124069	2-oxoglutarate dehydrogenase, E2 component, dihydrolipoamide succinyltransferase, putative
TcCLB.510889.110	Q4E2N9	1.61723	0.229462	Uncharacterized protein
TcCLB.506219.40	Q4CR34	1.61664	0.234615	Uncharacterized protein
TcCLB.507917.10	Q4CN42	1.61431	0.11214	Surface protease GP63, putative
TcCLB.509791.120	Q4DNI4	1.61066	0.0937161	Kinetoplast DNA-associated protein, putative
TcCLB.509237.130	Q4DJS7	1.60409	0.15525	Cytoskeleton-associated protein CAP5.5, putative
TcCLB.506529.430	Q4E5N8	1.60007	0.104309	Alanine aminotransferase, putative
TcCLB.506125.20	Q4CN66	1.59924	0.14306	Uncharacterized protein
TcCLB.506789.334	Q4DZV6	1.59898	0.0526734	Uncharacterized protein
TcCLB.511287.49	Q4DJ07	1.59702	0.122635	Prostaglandin F synthase
TcCLB.511333.4	Q4CP00	1.59634	0.169451	Cytoskeleton-associated protein CAP5.5, putative (Fragment)
TcCLB.509701.10	Q4CLW3	1.59587	0.123368	Trifunctional enzyme alpha subunit, mitochondrial-like protein, putative (Fragment)
TcCLB.504867.20	Q4DEI4	1.59544	0.112784	ABC transporter, putative
TcCLB.511801.60	Q4D7H6	1.59299	0.121793	Mitochondrial DEAD box protein, putative
TcCLB.510131.30	Q4D5I3	1.59272	0.116413	Uncharacterized protein
TcCLB.510769.49	Q4DSU0	1.58763	0.139792	40S ribosomal protein S6
TcCLB.508827.70	Q4DK40	1.58665	0.190943	40S ribosomal protein S17, putative
TcCLB.509001.40	Q4CV42	1.58278	0.0796529	Calpain-like cysteine peptidase, putative
TcCLB.508959.4	Q4CV48	1.58275	0.0953173	Cytochrome c, putative
TcCLB.509003.30	Q4CW64	1.57949	0.113435	Calpain-like cysteine peptidase, putative
TcCLB.506357.40	Q4DY24	1.5779	0.178026	Elongation factor TU, putative
TcCLB.510889.221	Q4E2M9	1.57723	0.13826	Glucose-6-phosphate isomerase
TcCLB.506355.50	Q4DKC8	1.57646	0.0464692	Chaperone DnaJ protein, putative
TcCLB.507059.60	Q4DBC5	1.57613	0.101482	Orotidine-5-phosphate decarboxylase/orotate phosphoribosyltransferase, putative
TcCLB.510667.120	Q4DFH6	1.57608	0.0916337	Galactokinase, putative
TcCLB.510089.110	Q4DQZ8	1.57274	0.125936	Uncharacterized protein
TcCLB.507919.10	Q4CP24	1.56839	0.102956	Surface protease GP63, putative
TcCLB.503769.40	Q4CXC3	1.56475	0.10513	Cytochrome c oxidase VII, putative
TcCLB.511367.138	Q4DYH7	1.55446	0.0958788	Chaperone DnaJ protein, putative
TcCLB.510121.20	Q4DQ27	1.55393	0.170338	Phosphotransferase
TcCLB.508737.100	Q4DTH5	1.55313	0.211954	ATP-dependent Clp protease subunit, heat shock protein 78, putative
TcCLB.509911.74	Q4DFQ0	1.55241	0.0912647	Uncharacterized protein
TcCLB.511233.7	Q4DN74	1.55147	0.198912	60S ribosomal protein L10a, putative (Fragment)
pfk	Q4E657	1.54783	0.180168	ATP-dependent 6-phosphofructokinase
TcCLB.511903.40	Q4DU88	1.54555	0.189857	Uncharacterized protein
TcCLB.508197.10	Q4CNF4	1.54238	0.130558	60S ribosomal protein L11, putative
TcCLB.507093.320	Q4E1M6	1.53687	0.218793	Uncharacterized protein
TcCLB.508501.250	Q4DUU1	1.53329	0.129421	Uncharacterized protein
TcCLB.511277.70	Q4E5I8	1.52416	0.202166	Elongation factor TU, putative
TcCLB.509391.10	Q4D1Q2	1.52393	0.166894	Calcium-binding protein, putative
TcCLB.506401.320	Q4E3R2	1.52161	0.192367	60S ribosomal protein L7a, putative
TcCLB.510091.80	Q4DB91	1.52046	0.1251	Pyruvate dehydrogenase E1 beta subunit, putative
TcCLB.504505.20	Q4CQM8	1.51854	0.0449707	Retrotransposon hot spot (RHS) protein, putative
TcCLB.506507.10	Q4CZT5	1.51548	0.0374343	N-acetylglucosamine-6-phosphate deacetylase-like protein, putative (Fragment)
TcCLB.507053.180	Q4DTI7	1.51296	0.192079	Uncharacterized protein
TcCLB.509767.230	Q4DSB1	1.50598	0.0970896	Uncharacterized protein
TcCLB.510643.190	Q4DWU4	1.50471	0.202555	Retrotransposon hot spot (RHS) protein, putative
TcCLB.509157.60	Q4DTE0	1.50233	0.289253	1-acyl-sn-glycerol-3-phosphate acyltransferase, putative
TcCLB.509695.200	Q4DTP9	1.50072	0.0892784	T-complex protein 1 subunit delta
TcCLB.506327.90	Q4DBG2	1.49362	0.165752	Serine/threonine protein kinase, putative
TcCLB.506559.559	Q4E572	1.49336	0.0816992	Antigenic protein, putative (Fragment)
TcCLB.506989.140	Q4DW94	1.49066	0.222102	Elongation factor Ts 2, mitochondrial
TcCLB.507519.110	Q4DNZ7	1.48584	0.192266	60S ribosomal protein L7, putative
TcCLB.503611.20	Q4E078	1.48242	0.168848	Ribosomal protein L24, putative
TcCLB.509213.40	Q4DGY4	1.48191	0.189736	Uncharacterized protein
TcCLB.510101.140	Q4E3P5	1.47889	0.209402	Pyruvate, phosphate dikinase
TcCLB.507001.110	Q4DF18	1.46865	0.0342318	Galactokinase-like protein, putative
TcCLB.509539.50	Q4D318	1.46653	0.0602746	Small GTP-binding protein, putative
TcCLB.503577.20	Q4CM27	1.46324	0.192237	U2 splicing auxiliary factor, putative
TcCLB.506581.30	Q4CY21	1.46277	0.135191	Eukaryotic translation initiation factor 3 (EIF-3) interacting protein, putative
TcCLB.509859.40	Q4D4Y0	1.46184	0.194354	Cytosolic leucyl aminopeptidase, putative
TcCLB.509409.10	Q4CLI0	1.46163	0.287845	Protein kinase, putative
TcCLB.506441.20	Q4CSI2	1.4565	0.245986	Uncharacterized protein
TcCLB.510729.80	Q4DWX7	1.44127	0.246075	Uncharacterized protein
TcCLB.511001.9	Q4DZ41	1.43928	0.212134	40S ribosomal protein S3a-2
TcCLB.504119.10	Q4CSE1	1.43295	0.162683	Eukaryotic translation initiation factor 5, putative
TcCLB.506773.130	Q4DQE9	1.42349	0.146078	Pumilio-repeat, RNA-binding protein, putative
TcCLB.506925.319	Q4E4L7	1.41954	0.144051	Isocitrate dehydrogenase [NADP]
TcCLB.504163.30	Q4D4S1	1.41804	0.160435	40S ribosomal protein S9, putative
TcCLB.511815.170	Q4DJ92	1.41609	0.2607	Uncharacterized protein
TcCLB.510187.551	Q4E496	1.41486	0.209424	Chaperonin HSP60 mitochondrial, putative (Fragment)
TcCLB.509695.170	Q4CVX9	1.41203	0.221712	60S ribosomal protein L9, putative
TcCLB.511393.49	Q4D3C0	1.41004	0.134179	Uncharacterized protein
TcCLB.509767.170	Q4DSB7	1.40723	0.301815	Uncharacterized protein
TcCLB.508543.30	Q4DSJ7	1.40572	0.172087	40S ribosomal protein S9, putative
TcCLB.511145.60	Q4D1H0	1.40271	0.191573	ATP synthase F1 subunit gamma protein, putative
TcCLB.508741.170	Q4E355	1.40197	0.240308	Uncharacterized protein
TcCLB.506235.20	Q4CSK3	1.39139	0.0542925	Uncharacterized protein
TcCLB.511667.20	Q4DNM2	1.38914	0.243177	Retrotransposon hot spot (RHS) protein, putative
TcCLB.507681.150	Q4DW38	1.38814	0.244799	40S ribosomal protein S24
TcCLB.506213.120	Q4DC19	1.38704	0.230771	ATP-dependent RNA helicase, putative
TcCLB.504105.20	Q4DZB0	1.38615	0.219548	Eukaryotic translation initiation factor 5, putative
TcCLB.504013.100	Q4D6N9	1.38451	0.21034	Ribosomal protein S19, putative
TcCLB.506529.508	Q4E5N1	1.37924	0.2401	Glucose-6-phosphate isomerase
TcCLB.509895.10	Q4DCY3	1.37749	0.176195	Uncharacterized protein
TcCLB.508461.500	Q4E4Q8	1.37606	0.242572	60S ribosomal protein L27A/L29, putative
TcCLB.506211.160	Q4DYK2	1.37592	0.225678	ADP,ATP carrier protein 1, mitochondrial, putative
TcCLB.510741.180	Q4DRK9	1.37524	0.279744	ATP-dependent RNA helicase, putative
GMPR	Q4DFE7	1.37447	0.312215	GMP reductase
TcCLB.504153.310	Q4E2Q2	1.37081	0.203636	Heat shock protein, putative
TcCLB.504421.19	Q4CR23	1.36892	0.233009	Uncharacterized protein
TcCLB.409117.20	Q4D6I5	1.36395	0.195685	40S ribosomal protein S14, putative
TcCLB.509941.100	Q4DKB3	1.36283	0.26772	2,4-dienoyl-coa reductase FADH1, putative
TcCLB.506337.4	Q4DKY8	1.36033	0.305747	Short-chain dehydrogenase, putative (Fragment)
TcCLB.511903.110	Q4DU83	1.35691	0.266338	40S ribosomal protein S8
TcCLB.504069.30	Q4D1H8	1.3522	0.224175	60S ribosomal protein L32, putative
TcCLB.509207.40	Q4DH64	1.3491	0.265167	Uncharacterized protein
TcCLB.508973.50	Q4DBF7	1.34859	0.068022	ATP-dependent DEAD/H RNA helicase, putative
TcCLB.509213.120	Q4DGX6	1.34428	0.229377	Peptidase M20/M25/M40, putative
TcCLB.506195.110	Q4DXL5	1.34287	0.241755	Malate dehydrogenase
TcCLB.506925.300	Q4E4L9	1.34166	0.261993	Peptidyl-prolyl cis-trans isomerase
TcCLB.507907.50	Q4D622	1.33833	0.138308	Uncharacterized protein
TcCLB.506885.340	Q4E4G9	1.3371	0.29105	Uncharacterized protein
TcCLB.511323.40	Q4CY73	1.33596	0.256873	Histone H2A
TcCLB.504181.20	Q4DTQ1	1.33321	0.189965	40S ribosomal protein S23, putative
TcCLB.506525.10	Q4DK32	1.33158	0.249409	Uncharacterized protein
TcCLB.508899.54	Q4DMP7	1.32875	0.219904	Uncharacterized protein
TcCLB.507547.90	Q4D8V7	1.32862	0.278872	Glycosomal phosphoenolpyruvate carboxykinase, putative
TcCLB.506789.280	Q4DZW1	1.32787	0.153123	Purine nucleoside phosphorylase
TcCLB.508693.50	Q4DTV8	1.3262	0.235859	Uncharacterized protein
TcCLB.509233.180	Q4DTX7	1.32378	0.247004	ATP synthase subunit beta
TcCLB.510101.30	Q4E3Q5	1.32272	0.280991	60S ribosomal protein L28, putative
TcCLB.509583.10	Q4CPG3	1.32222	0.249215	Chaperonin TCP20, putative
TcCLB.511293.69	Q4DDK8	1.31822	0.288978	Glycosomal malate dehydrogenase, putative
TcCLB.511181.80	Q4DPR0	1.31762	0.29087	Threonyl-tRNA synthetase, putative
TcCLB.508441.20	Q4DB81	1.3172	0.285069	Glycosomal phosphoenolpyruvate carboxykinase, putative
TcCLB.511289.70	Q4DD13	1.31698	0.265986	ADP,ATP carrier protein 1, mitochondrial, putative
TcCLB.508169.20	Q4D5X0	1.31696	0.271044	Elongation factor 2, putative
TcCLB.508827.40	Q4DK44	1.31624	0.236189	Acyl-CoA dehydrogenase, putative
TcCLB.511049.40	Q4CTR0	1.31587	0.252612	Leucyl-tRNA synthetase, putative
TcCLB.511903.120	Q4DU82	1.31481	0.159501	Transketolase
TcCLB.507941.150	Q4DEL1	1.31328	0.279765	Histone H4
TcCLB.510187.30	Q4E4E7	1.30815	0.297572	Tyrosine aminotransferase
TcCLB.508461.410	Q4E4R8	1.307	0.253373	T-complex protein 1, eta subunit, putative
TcCLB.508321.40	Q4CYH6	1.30676	0.27742	Uncharacterized protein
TcCLB.510439.61	Q4CU95	1.30647	0.280534	Heat shock 70 kDa protein, putative (Fragment)
TcCLB.506315.50	Q4D7A0	1.30639	0.298759	60S ribosomal protein L13a, putative
GMPR	Q4E1M2	1.30099	0.32737	GMP reductase
TcCLB.508299.80	Q4D9G6	1.30069	0.286209	Threonyl-tRNA synthetase, putative
TcCLB.511809.130	Q4DGZ5	1.30046	0.294494	40S ribosomal protein S15, putative
TcCLB.508601.100	Q4DBQ1	1.30028	0.188864	Uncharacterized protein
TcCLB.511801.10	Q4D7I4	1.29599	0.206318	Uncharacterized protein
TcCLB.508981.39	Q4CWB6	1.29494	0.277262	Trifunctional enzyme alpha subunit, mitochondrial-like protein (Fragment)
TcCLB.505843.10	Q4CVH4	1.29349	0.231878	Glutamate dehydrogenase, putative (Fragment)
TcCLB.511277.160	Q4E5H8	1.29344	0.307046	Ribosomal protein
TcCLB.508547.110	Q4DRF5	1.29311	0.109622	ATP-dependent DEAD/H RNA helicase, putative
TcCLB.508799.70	Q4DZK8	1.29151	0.20581	Pumilio-repeat, RNA-binding protein, putative
TcCLB.510669.20	Q4CR48	1.28887	0.322809	Gim5A protein, putative
TcCLB.510355.269	Q4DXF7	1.28746	0.243699	Cytochrome b5, putative (Fragment)
TcCLB.510945.70	Q4D1Q4	1.28723	0.272337	Aspartate aminotransferase, mitochondrial, putative
TcCLB.510507.20	Q4D7M6	1.28552	0.26578	3-ketoacyl-CoA thiolase, putative
TcCLB.510761.60	Q4DG40	1.28537	0.224696	Casein kinase II, putative
TcCLB.503719.20	Q4CQU0	1.28367	0.296278	40S ribosomal protein SA
TcCLB.511727.270	Q4DY32	1.28138	0.291131	RNA-binding protein, putative
TcCLB.508741.300	Q4E342	1.2781	0.225551	Proteasome regulatory non-ATPase subunit 6, putative
TcCLB.511573.58	Q4CU30	1.27699	0.300023	Nucleolar protein, putative (Fragment)
TcCLB.504057.40	Q4DSF3	1.27667	0.269863	Uncharacterized protein
TcCLB.509721.60	Q4D1I2	1.27165	0.293875	Poly [ADP-ribose] polymerase
TcCLB.506457.40	Q4DGA2	1.26892	0.315017	Hypoxanthine-guanine phosphoribosyltransferase, putative
TcCLB.509051.20	Q4CVL1	1.26664	0.252435	Amastin, putative
TcCLB.509139.10	Q4CNI8	1.26526	0.31559	Uncharacterized protein
TcCLB.506925.120	Q4E4N4	1.26482	0.249339	Eukaryotic translation initiation factor 5A
TcCLB.411235.9	Q4CLA1	1.26434	0.318	Tubulin alpha chain
TcCLB.507513.60	Q4D916	1.26259	0.29428	40S ribosomal protein S16, putative
TcCLB.510889.140	Q4E2N6	1.26198	0.262225	Alanine aminotransferase, putative
TcCLB.506563.40	Q4DQP2	1.25346	0.327834	Tubulin beta chain
TcCLB.511211.170	Q4DTM8	1.24795	0.320451	Heat shock protein 70 (HSP70), putative
TcCLB.507767.10	Q4CLP3	1.24651	0.290769	Succinyl-CoA ligase [GDP-forming] beta-chain, putative (Fragment)
TcCLB.508373.29	Q4CSV7	1.24363	0.283814	Orotidine-5-phosphate decarboxylase/orotate phosphoribosyltransferase, putative (Fragment)
TcCLB.506725.20	Q4D965	1.24324	0.352072	Uncharacterized protein
TcCLB.506241.100	Q4DU35	1.24218	0.29753	60S ribosomal protein L32, putative
TcCLB.511367.220	Q4DYH1	1.24127	0.305044	Uncharacterized protein
TcCLB.509149.40	Q4D169	1.23911	0.336564	60S ribosomal protein L19, putative
TcCLB.510089.200	Q4DQZ2	1.23825	0.226721	Uncharacterized protein
TcCLB.506297.150	Q4E0Q3	1.23804	0.305888	40S ribosomal protein S5, putative
TcCLB.508461.80	Q4E4V7	1.23373	0.320276	Prostaglandin F2alpha synthase
TcCLB.508785.10	Q4CNH5	1.23368	0.367995	Uncharacterized protein
TcCLB.504191.10	Q4CMB7	1.22738	0.353006	Methyltransferase
TcCLB.511583.40	Q4CVF7	1.22416	0.326383	Tricarboxylate carrier, putative
TcCLB.504057.90	Q4DSE6	1.22351	0.277489	Uncharacterized protein
TcCLB.508479.150	Q4E2L0	1.22338	0.251173	Serine/threonine protein kinase, putative
TcCLB.505183.30	Q4DJ68	1.22302	0.340371	Malic enzyme
TcCLB.507943.5	Q4CXR1	1.22206	0.337082	Histone H4 (Fragment)
TcCLB.508647.280	Q4DV36	1.22109	0.329884	Malic enzyme
TcCLB.509683.117	Q4D5P4	1.22026	0.335684	40S ribosomal protein S4
TcCLB.506577.120	Q4DR82	1.21992	0.343684	Sterol C-24 reductase, putative
TcCLB.510099.120	Q4DAE1	1.2165	0.339075	D-isomer specific 2-hydroxyacid dehydrogenase-protein, putative
TcCLB.504021.109	Q4DMK9	1.20711	0.353473	40S ribosomal protein S3, putative
TcCLB.503617.40	Q4CXB4	1.19967	0.324619	ATPase alpha subunit, putative (Fragment)
TcCLB.509561.20	Q4DDW3	1.19812	0.359873	Flagellum-adhesion glycoprotein, putative
TcCLB.509129.10	Q4CLT3	1.19804	0.357241	Uncharacterized protein
TcCLB.511287.90	Q4DJ02	1.19573	0.259933	Ribosome biogenesis protein, putative
TcCLB.508479.120	Q4E2L2	1.19275	0.320009	Pumilio/PUF RNA binding protein 8, putative
TcCLB.509141.40	Q4CSK6	1.19124	0.361832	Uncharacterized protein
TcCLB.508989.9	Q4DAD9	1.19074	0.310417	Nucleoside phosphorylase, putative (Fragment)
TcCLB.507063.90	Q4E024	1.1868	0.337607	Mitochondrial DNA polymerase beta, putative
TcCLB.511281.60	Q4D9Z4	1.18114	0.385927	Pyruvate kinase
TcCLB.506567.100	Q4DBT8	1.1761	0.325828	Uncharacterized protein
TcCLB.508737.210	Q4DTG3	1.17589	0.373557	Uncharacterized protein
TcCLB.504045.110	Q4D9S6	1.1741	0.338721	Urocanate hydratase, putative
TcCLB.506989.220	Q4DW86	1.16871	0.300783	Uncharacterized protein
TcCLB.507569.10	Q4CTC8	1.16775	0.384358	Uncharacterized protein
TcCLB.504105.140	Q4DZ98	1.16573	0.3853	Enolase, putative
TcCLB.507259.10	Q4CM56	1.16501	0.359602	Tryparedoxin peroxidase, putative
TcCLB.507681.20	Q4DW49	1.16449	0.361513	Succinate--CoA ligase [ADP-forming] subunit beta, mitochondrial
TcCLB.506679.100	Q4E093	1.16156	0.367884	40S ribosomal protein S18, putative
TcCLB.507241.30	Q4CWA5	1.15984	0.324401	Arginine kinase, putative
TcCLB.508741.229	Q4E349	1.15775	0.388705	Uncharacterized protein
TcCLB.511803.40	Q4D015	1.15695	0.37422	Uncharacterized protein
TcCLB.511181.150	Q4DPQ4	1.15632	0.405327	Uncharacterized protein
TcCLB.506213.80	Q4DC23	1.15619	0.374205	60S ribosomal protein L17, putative
TcCLB.508739.60	Q4CMF1	1.15285	0.381712	Histone H4
TcCLB.508637.150	Q4DLI2	1.14901	0.350829	Ribonuclease L inhibitor, putative
TcCLB.510173.40	Q4DB38	1.14395	0.407683	Uncharacterized protein
TcCLB.511731.60	Q4D7F9	1.14356	0.382355	Glutamyl-tRNA synthetase, putative
TcCLB.509203.40	Q4D8L7	1.14334	0.386929	Glycosomal membrane protein, putative
TcCLB.510149.140	Q4DHQ1	1.14322	0.361053	RNA-binding protein, putative
TcCLB.511367.290	Q4DYG6	1.14242	0.372554	Uncharacterized protein
TcCLB.487507.10	Q4CVR5	1.13868	0.378996	Tryparedoxin peroxidase, putative
TcCLB.509937.180	Q4DSP6	1.13161	0.421609	Tyrosyl-tRNA synthetase, putative
TcCLB.504153.190	Q4E2R4	1.12989	0.406807	Uncharacterized protein
TcCLB.511319.20	Q4CU87	1.12857	0.377322	Uncharacterized protein
TcCLB.503539.30	Q4CP51	1.12741	0.394462	GTP-binding nuclear protein
TcCLB.509207.11	Q4DYB0	1.12718	0.394491	Histone H2A
TcCLB.506559.350	Q4E595	1.11839	0.40017	Asparaginyl-tRNA synthetase, putative
TcCLB.510763.109	Q4D1M6	1.11746	0.262057	rRNA processing protein, putative (Fragment)
TcCLB.507091.50	Q4DGV1	1.11389	0.403807	Aspartate carbamoyltransferase, putative
TcCLB.508851.180	Q4DJB6	1.11195	0.410537	14-3-3 protein, putative
TcCLB.506885.320	Q4E4H1	1.11049	0.436496	Uncharacterized protein
TcCLB.506443.70	Q4DMF2	1.10924	0.436312	Glutathione-S-transferase/glutaredoxin, putative
TcCLB.506559.410	Q4E589	1.10524	0.411806	Uncharacterized protein
TcCLB.510519.30	Q4DEB3	1.10065	0.42906	Mitochondrial structure specific endonuclease I (SSE-1), putative
TcCLB.510879.30	Q4DJY0	1.09848	0.406781	Uncharacterized protein
TcCLB.511733.10	Q4D6R4	1.09728	0.407836	Aldehyde dehydrogenase, putative (Fragment)
TcCLB.503959.78	Q4D3D1	1.09478	0.355015	Uncharacterized protein (Fragment)
TcCLB.508461.490	Q4E4R0	1.09233	0.43141	60S ribosomal protein L23, putative
TcCLB.510105.50	Q4DZU7	1.0894	0.419882	Fibrillarin, putative
TcCLB.503833.40	Q4DIZ9	1.08927	0.428421	40S ribosomal protein S2, putative
TcCLB.511517.37	Q4DMU8	1.08455	0.439188	Reticulon-like protein
TcCLB.506773.44	Q4DQF8	1.07879	0.41779	Cytochrome b5, putative
TcCLB.506529.420	Q4E5P0	1.07442	0.442739	Alanine aminotransferase, putative
TcCLB.510509.50	Q4CVB9	1.07392	0.432372	Mitochondrial RNA binding protein, putative (Fragment)
TcCLB.506591.30	Q4D7U7	1.0736	0.409093	Uncharacterized protein
TcCLB.507017.40	Q4DFE2	1.07107	0.422522	2-hydroxy-3-oxopropionate reductase, putative
TcCLB.506025.4	Q4D1S6	1.06705	0.437076	Membrane-bound acid phosphatase, putative (Fragment)
TcCLB.503899.119	Q4DEJ5	1.06664	0.426359	Glutathione peroxidase
TcCLB.511289.100	Q4DD10	1.06157	0.455066	Uncharacterized protein
TcCLB.511283.10	Q4E2V9	1.05435	0.455867	Uncharacterized protein
TcCLB.511465.10	Q4CPR5	1.05286	0.43482	Proteasome activator protein PA26, putative
TcCLB.510187.290	Q4E4C2	1.04823	0.459793	ATP-dependent DEAD/H RNA helicase, putative
TcCLB.507657.20	Q4CPW5	1.04763	0.465064	Glutamamyl carboxypeptidase, putative
TcCLB.511909.50	Q4D4X0	1.0435	0.414416	Uncharacterized protein
TcCLB.506189.10	Q4CNK1	1.0428	0.46534	Nucleolar protein, putative (Fragment)
TcCLB.507689.30	Q4CYZ6	1.03855	0.469425	Glutamamyl carboxypeptidase, putative
TcCLB.507609.60	Q4DFC2	1.03356	0.455849	Myo-inositol-1-phosphate synthase, putative
TcCLB.508999.220	Q4E0D6	1.02835	0.477323	Calpain cysteine peptidase, putative
TcCLB.506321.280	Q4DYE0	1.02754	0.477315	Uncharacterized protein
TcCLB.511367.340	Q4DYG2	1.02504	0.474161	Mitochondrial processing peptidase alpha subunit, putative
TcCLB.511277.110	Q4E5I4	1.02291	0.473248	Citrate synthase
TcCLB.508271.30	Q4CXE1	1.0217	0.484064	Uncharacterized protein
TcCLB.508299.60	Q4D5K2	1.02128	0.483354	60S ribosomal protein L2, putative
TcCLB.511047.40	Q4D0C0	1.02127	0.483426	NADH-cytochrome b5 reductase
TcCLB.510777.20	Q4CNC1	1.01997	0.473433	Aspartyl-tRNA synthetase, putative
TcCLB.510735.70	Q4D3W8	1.01862	0.483698	Uncharacterized protein
TcCLB.507895.124	Q4DJQ1	1.0185	0.483358	Uncharacterized protein
TcCLB.510101.40	Q4E3Q3	1.01668	0.48689	60S ribosomal protein L28, putative
TcCLB.509695.210	Q4DTP7	1.00991	0.49106	Carboxypeptidase
TcCLB.508307.170	Q4DRX6	1.00544	0.494797	Ribosome assembly factor mrt4
TcCLB.508737.150	Q4DTH1	1.00492	0.495372	Mitochondrial carrier protein, putative
TcCLB.510877.40	Q4DPV6	1.00281	0.497952	Uncharacterized protein
TcCLB.506211.250	Q4DYJ3	1.00018	0.499905	Fibrillarin, putative
TcCLB.511811.30	Q4CRN8	-1.00532	0.49519	Uncharacterized protein (Fragment)
TcCLB.509733.170	Q4DWB5	-1.01886	0.485457	Transitional endoplasmic reticulum ATPase, putative
TcCLB.504427.260	Q4DYM0	-1.02476	0.483829	Kinesin-like protein
TcCLB.511277.170	Q4E5H7	-1.02486	0.484764	ATP-dependent zinc metallopeptidase, putative
TcCLB.506563.200	Q4DQN6	-1.02577	0.479469	Calpain cysteine peptidase, putative
TcCLB.506679.140	Q4E088	-1.02752	0.478327	40S ribosomal protein S10, putative
TcCLB.509747.20	Q4DD81	-1.03132	0.478476	60S ribosomal protein L22, putative
TcCLB.509997.30	Q4D1B8	-1.04071	0.462919	Tryparedoxin, putative
TcCLB.509105.70	Q4DKI7	-1.04515	0.455712	Thiol-dependent reductase 1, putative
TcCLB.508323.100	Q4DFL2	-1.0453	0.469608	I/6 autoantigen, putative
TcCLB.507951.160	Q4DUS2	-1.04663	0.464513	Uncharacterized protein
TcCLB.511733.100	Q4D6Q5	-1.04743	0.465191	Uncharacterized protein
TcCLB.506887.20	Q4D345	-1.05111	0.435124	Uncharacterized protein
TcCLB.507053.10	Q4DTK4	-1.06719	0.446943	50S ribosomal protein L7Ae, putative
TcCLB.509047.40	Q4D6D8	-1.07218	0.443978	Uncharacterized protein
TcCLB.508355.250	Q4E3A4	-1.0981	0.412856	60S acidic ribosomal protein P0
TcCLB.507723.130	Q4DQJ3	-1.10872	0.356416	Eukaryotic translation initiation factor 3 subunit 8, putative
TcCLB.507093.300	Q4E1M8	-1.11409	0.413225	Uncharacterized protein
TcCLB.506025.14	Q4CXR4	-1.11775	0.416559	Ribosomal protein S29, putative
TcCLB.511627.110	Q4D832	-1.11816	0.380553	Heat shock protein DnaJ, putative
TcCLB.508719.70	Q4D3F7	-1.12018	0.428954	Uncharacterized protein
TcCLB.509053.170	Q4DG03	-1.12061	0.386518	DREV methyltransferase, putative
TcCLB.507063.100	Q4E023	-1.12992	0.398982	Mitochondrial DNA polymerase beta-PAK, putative
TcCLB.507611.310	Q4E3G1	-1.13022	0.33778	Eukaryotic translation initiation factor 3 subunit 8, putative
TcCLB.511211.120	Q4DTN2	-1.13397	0.391535	Activated protein kinase C receptor, putative
TcCLB.508119.144	Q4DQ60	-1.13688	0.419104	Ribosomal protein L38, putative
TcCLB.508693.20	Q4DTW1	-1.13854	0.383692	DNA topoisomerase IB, large subunit, putative
TcCLB.509105.130	Q4DKI0	-1.15008	0.411153	ATP-binding cassette protein, putative
TcCLB.511301.70	Q4DM85	-1.16369	0.299943	Peptidylprolyl isomerase
RPL18	Q4DZP2	-1.16443	0.399017	60S ribosomal protein L18
TcCLB.510395.20	Q4CNR5	-1.16716	0.3802	Uncharacterized protein
TcCLB.509569.100	Q4DKS7	-1.16746	0.345626	Nucleoside phosphorylase, putative
TcCLB.508265.100	Q4D770	-1.17496	0.397883	Uncharacterized protein
TcCLB.511469.20	Q4DCJ1	-1.17577	0.392468	Uncharacterized protein
TcCLB.506789.240	Q4DZW5	-1.17596	0.37298	Uncharacterized protein
EIF6	Q4E097	-1.18389	0.336252	Eukaryotic translation initiation factor 6
TcCLB.511469.70	Q4DCI5	-1.19142	0.409012	Prohibitin, putative
TcCLB.503829.40	Q4D1T1	-1.19457	0.363822	Uncharacterized protein
TcCLB.506201.39	Q4DG86	-1.20163	0.36127	25 kDa translation elongation factor 1-beta, putative
TcCLB.505183.20	Q4DJ69	-1.20722	0.326114	Malic enzyme
TcCLB.510593.49	Q4CW88	-1.20962	0.369741	Kinetoplast DNA-associated protein, putative
TcCLB.506937.10	Q4CTR7	-1.21612	0.334628	Malate dehydrogenase
TcCLB.504431.64	Q4D714	-1.22259	0.362625	High mobility group protein, putative
TcCLB.509471.59	Q4CZH3	-1.22859	0.40364	Histone H3, putative
TcCLB.509627.40	Q4CY99	-1.23084	0.299609	Uncharacterized protein
TcCLB.511181.50	Q4DPR3	-1.23217	0.339567	Mitochondrial processing peptidase, beta subunit, putative
TcCLB.506163.50	Q4D734	-1.23252	0.321004	Uncharacterized protein
TcCLB.503513.40	Q4CSX0	-1.23342	0.194183	Proteasome regulatory non-ATPase subunit 6, putative (Fragment)
TcCLB.506123.40	Q4CYD2	-1.24244	0.323082	Nucleolar RNA helicase II, putative
TcCLB.505931.50	Q4CWE9	-1.24405	0.400497	Histone H3, putative
TcCLB.509875.204	Q4E0C2	-1.25292	0.30941	Uncharacterized protein
TcCLB.503575.34	Q4D205	-1.25714	0.372886	Ribosomal protein L38, putative
TcCLB.510837.20	Q4CR09	-1.26303	0.32568	Glutamamyl carboxypeptidase, putative
TcCLB.507927.20	Q4D590	-1.26324	0.314718	Mitochondrial oligo_U binding protein TBRGG1, putative
TcCLB.506989.30	Q4DWA3	-1.26578	0.294073	ABC transporter, putative
TcCLB.511809.120	Q4DGZ6	-1.26965	0.296281	Uncharacterized protein
TcCLB.510759.120	Q4DS82	-1.2785	0.317142	Reiske iron-sulfur protein, putative
TcCLB.508177.90	Q4DF40	-1.28229	0.290945	Uncharacterized protein
TcCLB.510125.10	Q4D0T3	-1.30698	0.352639	Pumilio/PUF RNA binding protein 6, putative
TcCLB.503487.70	Q4CYL7	-1.31407	0.23227	Uncharacterized protein
TcCLB.511283.100	Q4E2V1	-1.31577	0.300313	Uncharacterized protein
TcCLB.511303.60	Q4DSL1	-1.31873	0.26465	Translation initiation factor, putative
TcCLB.509683.10	Q4DLU4	-1.31895	0.366689	Uncharacterized protein
TcCLB.503903.60	Q4CZR5	-1.32128	0.306629	Uncharacterized protein
TcCLB.511635.10	Q4CTD8	-1.32728	0.345604	Histone H2B
TcCLB.511421.50	Q4DWQ7	-1.33503	0.279863	Uncharacterized protein
TcCLB.504741.20	Q4DTU3	-1.33605	0.26194	Obg-like ATPase 1
TcCLB.506587.40	Q4D8X3	-1.3443	0.26404	ATP-dependent DEAD/H RNA helicase, putative
TcCLB.511715.100	Q4D599	-1.36409	0.240191	Pumilio/PUF RNA binding protein 7, putative
TcCLB.507511.40	Q4D3H6	-1.36425	0.272217	Uncharacterized protein
TcCLB.509429.320	Q4E0J7	-1.36677	0.219844	Cysteine peptidase, putative
TcCLB.511383.50	Q4D8I7	-1.43304	0.282796	Prohibitin, putative
TcCLB.507049.199	Q4DPW3	-1.4351	0.152255	Pumilio protein, putative (Fragment)
TcCLB.511367.370	Q4CRF6	-1.4665	0.314869	Elongation factor 1-alpha
TcCLB.503465.49	Q4CWV6	-1.47402	0.224824	Mitochondrial processing peptidase, beta subunit, putative (Fragment)
TcCLB.508415.40	Q4D7Y8	-1.4762	0.175975	ADP-ribosylation factor 1, putative
TcCLB.506943.160	Q4DCN0	-1.5138	0.216367	Eukaryotic translation initiation factor 3 subunit 7-like protein, putative
TcCLB.509643.70	Q4DBN3	-1.51701	0.231408	Uncharacterized protein
TcCLB.506529.360	Q4E5P5	-1.54514	0.195203	Cytochrome C oxidase subunit IV, putative
TcCLB.506135.9	Q4DAZ6	-1.57335	0.224493	Heat shock 70 kDa protein, putative (Fragment)
TcCLB.507641.64	Q4DYS0	-1.59094	0.206068	Uncharacterized protein
TcCLB.510755.129	Q4D7Y0	-1.6068	0.231763	60S ribosomal protein L12, putative
TcCLB.510661.250	Q4DUG8	-1.61403	0.218825	Cystathione gamma lyase, putative
TcCLB.506943.50	Q4DCN9	-1.6259	0.252383	Glyceraldehyde-3-phosphate dehydrogenase
TcCLB.505807.150	Q4DQH5	-1.6767	0.112419	Leucine-rich repeat protein, putative
TcCLB.511367.60	Q4DYI6	-1.70227	0.229836	LA RNA binding protein, putative
TcCLB.511807.280	Q4E1B7	-1.70684	0.192712	Uncharacterized protein
TcCLB.508479.340	Q4E2I6	-1.70688	0.176932	Succinate--CoA ligase [ADP-forming] subunit alpha, mitochondrial
TcCLB.506795.90	Q4DA79	-1.71547	0.134999	Uncharacterized protein
TcCLB.511277.570	Q4E5D7	-1.71739	0.0958458	60S ribosomal protein L7, putative
TcCLB.510823.70	Q4D991	-1.72022	0.145995	60S acidic ribosomal protein, putative
TcCLB.506963.14	Q4DN73	-1.77143	0.202016	40S ribosomal protein S27, putative
TcCLB.508301.20	Q4CNA4	-1.77477	0.194739	Mitochondrial processing peptidase, beta subunit, putative (Fragment)
TcCLB.506223.80	Q4DEY4	-1.81847	0.162215	ATP-dependent zinc metallopeptidase, putative
TcCLB.508205.20	Q4CUA4	-1.96702	0.141967	Nucleolar RNA helicase II, putative
TcCLB.503819.30	Q4CPV7	-2.05616	0.113889	Eukaryotic translation initiation factor 2 subunit, putative
TcCLB.503939.80	Q4DLK5	-2.12057	0.0872211	Prolyl-tRNA synthetase, putative
TcCLB.507053.40	Q4DTK1	-2.22746	0.116282	Uncharacterized protein
TcCLB.508045.100	Q4DIN6	-2.3447	0.0794744	Uncharacterized protein
TcCLB.508503.20	Q4D214	-2.36759	0.100323	Cytochrome c oxidase subunit V, putative
TcCLB.503833.50	Q4CUH2	-2.39349	0.159022	Uncharacterized protein
TcCLB.504017.10	Q4D103	-2.46975	0.122609	Nascent polypeptide-associated complex subunit beta
TcCLB.509229.80	Q4DI18	-2.608	0.104549	Mitochondrial processing peptidase alpha subunit, putative
TcCLB.510187.20	Q4E4E9	-2.66356	0.122824	Tyrosine aminotransferase, putative
TcCLB.506735.10	Q4DB63	-2.78483	0.100183	Mitochondrial processing peptidase alpha subunit, putative
#These identifications were filtered out by the L-stringency and so deserve further experimentation to verify if they are indeed differentially expressed
TcCLB.509247.30	Q4D6H3	4.59981	0.000324663	Uncharacterized protein
TcCLB.510763.30	Q4D1N5	3.32817	0.00811696	Uncharacterized protein
TcCLB.508355.150	Q4E3B3	3.31069	0.0393799	Proteasome regulatory non-ATPase subunit 3, putative
TcCLB.511287.140	Q4DIZ6	3.21073	0.0111338	Uncharacterized protein
TcCLB.506817.30	Q4D604	3.09837	0.0455136	Ribosomal protein L27, putative
TcCLB.506503.56	Q4DRE0	3.09267	0.0493185	Uncharacterized protein
TcCLB.506659.20	Q4D527	3.0269	0.00873731	Mitochondrial DNA polymerase I protein C, putative
TcCLB.459199.10	Q4CQ60	2.86071	0.0213053	Retrotransposon hot spot (RHS) protein, putative
TcCLB.506297.30	Q4E0R5	2.7951	0.0167071	Uncharacterized protein
TcCLB.508777.110	Q4DS62	2.78714	0.020695	Uncharacterized protein
TcCLB.508177.129	Q4DF36	2.76027	0.000612253	Cystathionine beta-synthase, putative
TcCLB.506321.290	Q4DYD9	2.75519	0.000320246	Stress-induced protein sti1, putative
TcCLB.503819.10	Q4CPV9	2.72454	0.0270838	Uncharacterized protein
TcCLB.508067.10	Q4CNG6	2.6515	0.0108	Uncharacterized protein
TcCLB.510943.50	Q4DRT8	2.59392	0.00955987	Delta-1-pyrroline-5-carboxylate dehydrogenase, putative
TcCLB.503939.20	Q4DLL1	2.54302	0.0142533	Uncharacterized protein
TcCLB.508551.39	Q4CQF8	2.35362	0.00469762	Hexose transporter, putative (Fragment)
TcCLB.511821.179	Q4DQS9	2.28541	0.0196054	Uncharacterized protein (Fragment)
TcCLB.509167.20	Q4DQR5	2.26842	0.0104845	3-hydroxy-3-methylglutaryl coenzyme A reductase
TcCLB.506831.40	Q4D4C9	2.14066	0.00956085	3-hydroxy-3-methylglutaryl coenzyme A reductase
TcCLB.503809.20	Q4DK17	2.13275	0.0100336	Peroxisome assembly protein, putative
TcCLB.509109.30	Q4DQN2	2.12958	0.00910414	Uncharacterized protein
TcCLB.506815.60	Q4CV79	2.04032	0.0016646	60S ribosomal protein L44, putative
TcCLB.507777.20	Q4CUW6	-3.31034	0.0414178	Uncharacterized protein

## Sheet: Pt-dppf-mpo unique insol prot
Pt-dppf-mpo unique insoluble proteins (ONLY CONTROL)
Gene ID	Uniprot ID	Replicate Count	Total Signal	Description
TcCLB.507483.30	Q4D139	2	24	Calmodulin, putative
TcCLB.511293.40	Q4DDL1	2	23	U3 snoRNA-associated protein UTP11, putative
TcCLB.510729.160	Q4DWW8	2	23	Uncharacterized protein
TcCLB.509247.50	Q4D6H2	2	19	Methionyl-tRNA synthetase, putative
TcCLB.511751.160	Q4DVU8	2	19	Uncharacterized protein
TcCLB.508879.120	Q4DXE4	2	17	Uncharacterized protein
TcCLB.509109.120	Q4DQM4	2	17	Protein tyrosine phosphatase, putative
TcCLB.511577.44	Q4DM34	2	15	Uncharacterized protein
TcCLB.508971.40	Q4D7V2	2	14	Acetylornithine deacetylase-like, putative
TcCLB.511545.70	Q4DMS4	2	13	Uncharacterized protein
TcCLB.509837.10	Q4CVB2	2	12	Uncharacterized protein
TcCLB.508989.30	Q4DAD7	2	12	RNA-binding protein, putative
TcCLB.508355.160	Q4E3B2	2	12	Uncharacterized protein
TcCLB.507671.30	Q4CQA2	2	9	25 kDa translation elongation factor 1-beta
TcCLB.509233.80	Q4DTY2	2	8	Heat shock protein DnaJ, putative
TcCLB.509533.10	Q4CXJ1	2	8	Trans-sialidase, putative
TcCLB.506925.280	Q4E4M1	2	8	Uncharacterized protein
TcCLB.507073.40	Q4CX80	2	7	Uncharacterized protein
TcCLB.510663.40	Q4D0X9	2	6	Uncharacterized protein
Pt-dppf-mpo unique insoluble proteins (ONLY TREATED)
Gene ID	Uniprot ID	Replicate Count	Total Signal	Description
TcCLB.506147.190	Q4DT88	3	79	Uncharacterized protein
TcCLB.510357.130	Q4DBV1	3	52	Uncharacterized protein
TcCLB.506753.230	Q4DLW7	3	38	Uncharacterized protein
TcCLB.509033.80	Q4D9F7	3	33	Uncharacterized protein
TcCLB.508727.50	Q4CWH7	3	32	Uncharacterized protein
TcCLB.510187.100	Q4E4E1	3	30	Glucokinase 1, putative
TcCLB.511419.40	Q4D193	3	26	Phosphoglycerate kinase
TcCLB.505999.90	Q4DNV8	3	26	Phosphoglycerate kinase
TcCLB.511649.70	Q4DL10	3	26	Structural maintenance of chromosomes protein
TcCLB.503479.70	Q4D6Z0	3	26	Uncharacterized protein
TcCLB.507005.60	Q4D2P9	3	24	Structural maintenance of chromosomes protein
TcCLB.507949.250	Q4DS02	3	23	Uncharacterized protein
TcCLB.506491.20	Q4D1D3	3	23	Myosin heavy chain, putative (Fragment)
TcCLB.510943.33	Q4DRU2	3	21	Fatty acyl CoA synthetase, putative
TcCLB.506691.14	Q4D976	3	18	ATP-dependent DEAD/H RNA helicase, putative (Fragment)
TcCLB.506041.20	Q4CUZ5	3	18	Uncharacterized protein
TcCLB.508479.230	Q4E2J8	3	17	Peroxin-2, putative
TcCLB.508045.70	Q4DIN9	3	17	Uncharacterized protein
TcCLB.511025.70	Q4DD37	3	16	Chaperonin alpha subunit, putative
TcCLB.507583.20	Q4CX97	3	16	Nucleolar protein, putative
TcCLB.509719.40	Q4D7J7	3	16	Cytochrome P450, putative
TcCLB.411427.30	Q4CRB9	3	16	Uncharacterized protein
TcCLB.506195.80	Q4DXL7	3	15	Adenylate kinase, putative
TcCLB.509053.70	Q4DG13	3	15	p22 protein, putative
TcCLB.511309.70	Q4D8H6	3	13	Uncharacterized protein
TcCLB.511497.19	Q4CKT7	3	12	Amastin, putative (Fragment)
TcCLB.508731.60	Q4CWX1	3	11	Adenylosuccinate synthetase 2
TcCLB.506303.80	Q4DN44	3	10	Uncharacterized protein
TcCLB.509003.40	Q4CW63	2	49	Calpain-like cysteine peptidase, putative
TcCLB.504033.90	Q4DR73	2	22	Mitochondrial carrier protein, putative
TcCLB.507081.120	Q4DGT7	2	22	Uncharacterized protein
TcCLB.508839.80	Q4D5K8	2	17	Uncharacterized protein
TcCLB.504741.240	Q4DTS0	2	17	Uncharacterized protein
TcCLB.509585.10	Q4CX46	2	17	Dynein heavy chain, putative (Fragment)
TcCLB.509215.40	Q4D2G4	2	16	Peptidyl-prolyl cis-trans isomerase
TcCLB.506829.100	Q4DD92	2	16	Fatty acyl CoA syntetase 1, putative
TcCLB.508711.40	Q4CZK9	2	16	Uncharacterized protein
TcCLB.506739.170	Q4DRQ5	2	16	Uncharacterized protein
TcCLB.506585.70	Q4D617	2	15	p450 reductase, putative
TcCLB.508445.20	Q4D4J5	2	14	Superoxide dismutase
TcCLB.511639.20	Q4CN47	2	14	Uncharacterized protein
TcCLB.509203.70	Q4D8L4	2	13	DNA topoisomerase 2
TcCLB.509437.70	Q4DV89	2	13	Uncharacterized protein
TcCLB.508397.40	Q4D3E3	2	13	Uncharacterized protein
TcCLB.507211.40	Q4CUG6	2	12	Inosine-5'-monophosphate dehydrogenase
TcCLB.510105.210	Q4DZT3	2	12	Mitochondrial ATP-dependent zinc metallopeptidase, putative
TcCLB.507669.10	Q4DRX1	2	12	Fumarate hydratase, putative
TcCLB.509429.120	Q4E0L8	2	11	Uncharacterized protein
TcCLB.509717.20	Q4DMG9	2	11	Acetyltransferase component of pyruvate dehydrogenase complex
TcCLB.511301.110	Q4DM82	2	10	Inosine-5'-monophosphate dehydrogenase
TcCLB.508613.30	Q4DBE4	2	10	Peroxisomal membrane protein 4, putative
TcCLB.510151.10	Q4CMH9	2	10	Fatty acyl CoA syntetase 1, putative (Fragment)
TcCLB.506925.470	Q4E4K5	2	9	Heat shock protein DnaJ, putative
TcCLB.402863.9	Q4CQ22	2	9	Dynein heavy chain, putative (Fragment)
TcCLB.508319.40	Q4D0U9	2	9	RNA helicase, putative
TcCLB.504153.20	Q4E2S6	2	8	Phosphoglycerate kinase
TcCLB.422189.10	Q4CLN0	2	7	Nucleoside phosphatase, putative (Fragment)
TcCLB.510099.20	Q4DAF0	2	7	Uncharacterized protein
TcCLB.507611.370	Q4E3F7	2	7	Protein disulfide-isomerase
TcCLB.509951.49	Q4CRQ2	2	7	DNA-directed RNA polymerase II subunit 2, putative (Fragment)
TcCLB.506229.50	Q4D4Q0	2	6	Nucleoside phosphatase, putative
TcCLB.510105.250	Q4DZS9	2	6	Membrane-bound acid phosphatase 2, putative
TcCLB.511231.50	Q4CYN6	2	6	Aminomethyltransferase
TcCLB.503511.10	Q4CMG2	2	6	Uncharacterized protein
TcCLB.506559.500	Q4E577	2	4	Uncharacterized protein
