# Supplementary material for: Comparative high-throughput analysis of the Trypanosoma cruzi response to organometallic compounds
Source: Royal Society of Chemistry journal article supplement (doi:10.1039/d0mt00030b), 2020-03-24
Supplement: d0mt00030b8.xlsx [file d0mt00030b8.xlsx]

## Sheet: Over-represented proteins
	Pd-dppf-mpo over-represented soluble and insoluble proteins				Pt-dppf-mpo over-represented soluble and insoluble proteins
107 elements included exclusively in over-represented proteins in Pd-dppf-mpo			21 common elements in over-represented proteins between Pd-dppf-mpo and Pt-dppf-mpo			155 elements included exclusively in over-represented proteins in Pt-dppf-mpo
Gene ID	Description		Gene ID	Description		Gene ID	Description
TcCLB.509261.30	3,2-trans-enoyl-CoA isomerase, mitochondrial, putative		TcCLB.508465.110	Acyl-CoA dehydrogenase, putative		TcCLB.507017.40	2-hydroxy-3-oxopropionate reductase, putative
TcCLB.509167.20	3-hydroxy-3-methylglutaryl coenzyme A reductase		TcCLB.503745.30	Ascorbate-dependent peroxidase, putative		TcCLB.503935.20	2-oxoglutarate dehydrogenase, E2 component, dihydrolipoamide succinyltransferase, putative
TcCLB.504181.20	40S ribosomal protein S23, putative		TcCLB.510955.40	Axoneme central apparatus protein, putative		TcCLB.506025.60	2-oxoglutarate dehydrogenase, E2 component, dihydrolipoamide succinyltransferase, putative
TcCLB.503801.20	40S ribosomal protein S26		TcCLB.508277.370	DNA topoisomerase 2		TcCLB.511529.160	3-hydroxyisobutyryl-CoA hydrolase, mitochondrial
TcCLB.508197.10	60S ribosomal protein L11, putative		TcCLB.504163.50	Fructose-bisphosphate aldolase		TcCLB.506885.400	40 kDa cyclophilin, putative
TcCLB.508153.280	60S ribosomal protein L13		TcCLB.511211.220	Heat shock protein 70, putative		TcCLB.511825.200	40S ribosomal protein L14, putative
TcCLB.506957.90	60S ribosomal protein L18a		TcCLB.507211.40	Inosine-5'-monophosphate dehydrogenase		TcCLB.506577.54	60S ribosomal protein L6
TcCLB.508461.500	60S ribosomal protein L27A/L29, putative		TcCLB.511575.60	Isocitrate dehydrogenase [NADP]		TcCLB.509717.20	Acetyltransferase component of pyruvate dehydrogenase complex
TcCLB.509671.80	60S ribosomal protein L5, putative		TcCLB.511817.40	NADH-cytochrome b5 reductase		TcCLB.507001.80	Acyl-CoA dehydrogenase, putative
TcCLB.507519.110	60S ribosomal protein L7, putative		TcCLB.510039.40	Nitrilase, putative		TcCLB.506195.80	Adenylate kinase, putative
TcCLB.510835.40	60S ribosomal protein L7a, putative		TcCLB.506485.80	Oxidoreductase, putative		TcCLB.508731.60	Adenylosuccinate synthetase 2
TcCLB.508207.70	Adenine phosphoribosyltransferase, putative		TcCLB.511383.50	Prohibitin, putative		TcCLB.511511.170	ADP-ribosylation factor-like protein, putative
TcCLB.503479.30	Adenylate kinase, putative		TcCLB.510105.240	Short chain 3-hydroxyacyl-coa dehydrogenase, putative		TcCLB.511497.19	Amastin, putative (Fragment)
TcCLB.506587.40	ATP-dependent DEAD/H RNA helicase, putative		TcCLB.507005.60	Structural maintenance of chromosomes protein		TcCLB.511231.50	Aminomethyltransferase
TcCLB.509153.90	Bifunctional dihydrofolate reductase-thymidylate synthase		TcCLB.504109.90	Ubiquitin carboxyl-terminal hydrolase		TcCLB.507241.30	Arginine kinase, putative
TcCLB.509749.10	Biotin/lipoate protein ligase, putative		TcCLB.506195.290	Uncharacterized protein		TcCLB.506193.60	Ascorbate-dependent peroxidase, putative
TcCLB.508293.90	Elongation factor 1-gamma (EF-1-gamma), putative		TcCLB.509141.40	Uncharacterized protein		TcCLB.511643.30	Aspartate carbamoyltransferase, putative
TcCLB.511751.200	Epsilon-adaptin, putative		TcCLB.506147.190	Uncharacterized protein		TcCLB.507091.50	Aspartate carbamoyltransferase, putative
TcCLB.510669.20	Gim5A protein, putative		TcCLB.506481.20	Uncharacterized protein		TcCLB.509937.20	ATP-dependent (S)-NAD(P)H-hydrate dehydratase
TcCLB.511391.120	Glutamamyl carboxypeptidase, putative		TcCLB.503959.78	Uncharacterized protein (Fragment)		TcCLB.506795.44	ATP-dependent (S)-NAD(P)H-hydrate dehydratase
TcCLB.509445.39	Glutamate dehydrogenase, putative (Fragment)		TcCLB.507801.179	Vesicle-associated membrane protein, putative		TcCLB.468941.9	ATP-dependent DEAD/H RNA helicase, putative (Fragment)
TcCLB.511229.110	Glycyl-tRNA synthetase, putative					TcCLB.506691.14	ATP-dependent DEAD/H RNA helicase, putative (Fragment)
TcCLB.511323.40	Histone H2A					TcCLB.511285.120	ATP-dependent RNA helicase, putative
TcCLB.506625.60	Inositol 5-phosphatase 1, putative					TcCLB.506213.120	ATP-dependent RNA helicase, putative
TcCLB.507447.19	Microtubule-associated protein, putative (Fragment)					TcCLB.508999.220	Calpain cysteine peptidase, putative
TcCLB.506203.129	Mitochondrial DNA-directed RNA polymerase, putative (Fragment)					TcCLB.509003.40	Calpain-like cysteine peptidase, putative
TcCLB.511181.50	Mitochondrial processingptidase, beta subunit, putative					TcCLB.504153.160	Carboxypeptidase, putative
TcCLB.511233.100	Nudix hydrolase, putative					TcCLB.511025.70	Chaperonin alpha subunit, putative
TcCLB.506989.160	Peroxisomal targeting signal type 2 receptor, putative					TcCLB.506247.50	Chaperonin, putative
TcCLB.510431.250	Phosphoribosylpyrophosphate synthetase, putative					TcCLB.509859.80	Coronin
TcCLB.509489.29	Proteasome regulatory non-ATP-ase subunit, putative (Fragment)					TcCLB.511827.100	Cysteine peptidase C (CPC), putative
TcCLB.504069.53	Proteasome subunit alpha type					TcCLB.509719.40	Cytochrome P450, putative
TcCLB.511145.43	Proteasome subunit alpha type					TcCLB.506945.190	Cytochrome p450-like protein, putative
TcCLB.506885.350	Proteasome subunit alpha type					TcCLB.511025.110	Dihydrolipoyl dehydrogenase
TcCLB.508445.10	Rab11B GTPase, putative					TcCLB.507089.270	Dihydrolipoyl dehydrogenase
TcCLB.509735.120	Retrotransposon hot spot (RHS) protein, putative					TcCLB.506445.60	DNA topoisomerase 2
TcCLB.506405.149	Ribosomal protein L21E (60S), putative					TcCLB.509203.70	DNA topoisomerase 2
TcCLB.504105.94	Ribosomal protein S25, putative					TcCLB.506493.80	DNA topoisomerase IA, putative
TcCLB.506977.49	Ribosomal proteins L36, putative					TcCLB.509951.49	DNA-directed RNA polymerase II subunit 2, putative (Fragment)
TcCLB.510755.120	RNA-binding protein, putative					TcCLB.509543.50	DNAK protein, putative (Fragment)
TcCLB.509317.60	RNA-binding protein, putative					TcCLB.509585.10	Dynein heavy chain, putative (Fragment)
TcCLB.511621.50	RNA-binding protein, putative					TcCLB.402863.9	Dynein heavy chain, putative (Fragment)
TcCLB.507897.30	Serine/threonine-protein kinase A, putative					TcCLB.506829.100	Fatty acyl CoA syntetase 1, putative
TcCLB.508805.80	Short chain dehydrogenase, putative					TcCLB.510151.10	Fatty acyl CoA syntetase 1, putative (Fragment)
TcCLB.511407.60	Small GTP-binding protein Rab11, putative					TcCLB.510943.33	Fatty acyl CoA synthetase, putative
TcCLB.511389.150	Thiolase protein-like protein, putative					TcCLB.507669.10	Fumarate hydratase, putative
TcCLB.508303.65	Thioredoxin-like protein, putative					TcCLB.511727.300	GDP-L-fucose synthetase, putative
TcCLB.509065.124	U6 snRNA-associated Sm-like protein LSm5p					TcCLB.510187.100	Glucokinase 1, putative
TcCLB.510357.70	Ubiquinone biosynthesis protein COQ4 homolog 1, mitochondrial					TcCLB.506953.49	Glucose-6-phosphate 1-dehydrogenase, putative (Fragment)
TcCLB.506479.20	Uncharacterized protein					TcCLB.506943.50	Glyceraldehyde-3-phosphate dehydrogenase
TcCLB.506511.20	Uncharacterized protein					TcCLB.506925.470	Heat shock protein DnaJ, putative
TcCLB.507649.10	Uncharacterized protein					TcCLB.504431.64	High mobility group protein, putative
TcCLB.506791.50	Uncharacterized protein					TcCLB.506247.220	Histidine ammonia-lyase
TcCLB.508813.60	Uncharacterized protein					TcCLB.505931.50	Histone H3, putative
TcCLB.509601.100	Uncharacterized protein					TcCLB.511301.110	Inosine-5'-monophosphate dehydrogenase
TcCLB.506337.180	Uncharacterized protein					TcCLB.509797.40	Isoleucyl-tRNA synthetase, putative
TcCLB.511367.129	Uncharacterized protein					TcCLB.504427.260	Kinesin-like protein
TcCLB.511393.49	Uncharacterized protein					TcCLB.508719.40	Kinetoplast DNA-associated protein, putative
TcCLB.506977.60	Uncharacterized protein					TcCLB.510353.10	Major vault protein
TcCLB.508547.180	Uncharacterized protein					TcCLB.510105.250	Membrane-bound acid phosphatase 2, putative
TcCLB.506401.190	Uncharacterized protein					TcCLB.510105.210	Mitochondrial ATP-dependent zinc metallopeptidase, putative
TcCLB.507993.70	Uncharacterized protein					TcCLB.504033.90	Mitochondrial carrier protein, putative
TcCLB.511801.30	Uncharacterized protein					TcCLB.506491.20	Myosin heavy chain, putative (Fragment)
TcCLB.511573.20	Uncharacterized protein					TcCLB.506821.210	NADH-cytochrome b5 reductase
TcCLB.506691.80	Uncharacterized protein					TcCLB.510215.10	NADH-dependent fumarate reductase, putative
TcCLB.509247.30	Uncharacterized protein					TcCLB.503849.60	NADH-dependent fumarate reductase, putative
TcCLB.510089.110	Uncharacterized protein					TcCLB.503467.9	NADH-dependent fumarate reductase, putative (Fragment)
TcCLB.503781.90	Universal minicircle sequence binding protein (UMSBP), putative					TcCLB.504425.60	NADP-dependent alcohol hydrogenase, putative
TcCLB.509167.100	Valyl-tRNA synthetase, putative					TcCLB.508677.80	NADP-dependent alcohol hydrogenase, putative
TcCLB.509701.10	Trifunctional enzyme alpha subunit, mitochondrial-like protein, putative (Fragment)					TcCLB.509979.150	Nitrilase, putative
TcCLB.508719.70	Uncharacterized protein					TcCLB.507583.20	Nucleolar protein, putative
TcCLB.503577.20	U2 splicing auxiliary factor, putative					TcCLB.506229.50	Nucleoside phosphatase, putative
TcCLB.507919.10	Surface protease GP63, putative					TcCLB.422189.10	Nucleoside phosphatase, putative (Fragment)
TcCLB.506861.30	40S ribosomal protein L14, putative					TcCLB.509053.70	p22 protein, putative
TcCLB.510187.160	Developmentally regulated GTP-binding protein, putative					TcCLB.506585.70	p450 reductase, putative
TcCLB.506155.30	Kinesin-like protein, putative					TcCLB.509215.40	Peptidyl-prolyl cis-trans isomerase
TcCLB.506315.50	60S ribosomal protein L13a, putative					TcCLB.508897.110	Peptidylprolyl isomerase
TcCLB.510101.330	Uncharacterized protein					TcCLB.508479.230	Peroxin-2, putative
TcCLB.508981.39	Trifunctional enzyme alpha subunit, mitochondrial-like protein (Fragment)					TcCLB.511277.210	Peroxisomal enoyl-coa hydratase, putative
TcCLB.503635.59	40S ribosomal protein S3a-1					TcCLB.508613.30	Peroxisomal membrane protein 4, putative
TcCLB.503715.10	Splicing factor TSR1, putative					TcCLB.511419.40	Phosphoglycerate kinase
TcCLB.508153.490	Peptidyl-prolyl cis-trans isomerase					TcCLB.505999.100	Phosphoglycerate kinase
TcCLB.507765.110	Uncharacterized protein					TcCLB.506945.20	Phosphoglycerate kinase
TcCLB.508647.220	Uncharacterized protein					TcCLB.505999.90	Phosphoglycerate kinase
TcCLB.509979.70	Uncharacterized protein					TcCLB.504153.20	Phosphoglycerate kinase
TcCLB.510359.330	Uncharacterized protein					TcCLB.509261.10	p-nitrophenylphosphatase, putative
TcCLB.503819.10	Uncharacterized protein					TcCLB.511469.70	Prohibitin, putative
TcCLB.507817.80	5'-3' exonuclease XNRA, putative (Fragment)					TcCLB.506247.230	Prolyl oligopeptidase, putative
TcCLB.504017.40	Aminomethyltransferase					TcCLB.511287.49	Prostaglandin F synthase
TcCLB.511909.60	Uncharacterized protein					TcCLB.509505.10	Protein disulfide isomerase, putative (Fragment)
TcCLB.511071.130	Basal body component, putative					TcCLB.507611.370	Protein disulfide-isomerase
TcCLB.509011.20	DNA-directed RNA polymerase subunit					TcCLB.508215.9	Protein kinase C substrate protein, heavy chain, putative
TcCLB.510667.10	Uncharacterized protein					TcCLB.508387.20	Purine nucleoside phosphorylase
TcCLB.506627.20	Uncharacterized protein					TcCLB.506789.280	Purine nucleoside phosphorylase
TcCLB.508507.40	Uncharacterized protein					TcCLB.509059.50	Pyridoxal kinase, putative
TcCLB.507649.20	Uncharacterized protein					TcCLB.510091.80	Pyruvate dehydrogenase E1 beta subunit, putative
TcCLB.506543.40	Uncharacterized protein					TcCLB.510759.120	Reiske iron-sulfur protein, putative
TcCLB.509631.60	Dispersed gene family protein 1 (DGF-1), putative					TcCLB.509219.20	Retrotransposon hot spot (RHS) protein, putative
TcCLB.510579.30	Pescadillo homolog					TcCLB.506139.200	Retrotransposon hot spot (RHS) protein, putative
TcCLB.507073.40	Uncharacterized protein					TcCLB.508319.40	RNA helicase, putative
TcCLB.507927.100	Uncharacterized protein					TcCLB.506211.70	RNA-binding protein, putative
TcCLB.506275.50	Golgi SNARE protein-like, putative					TcCLB.506777.80	Seryl-tRNA synthetase, putative
TcCLB.506315.60	Uncharacterized protein					TcCLB.509717.90	Short chain 3-hydroxyacyl-coa dehydrogenase, putative
TcCLB.507517.50	Uncharacterized protein					TcCLB.511649.70	Structural maintenance of chromosomes protein
TcCLB.506249.60	40S ribosomal protein S8, putative					TcCLB.508479.340	Succinate--CoA ligase [ADP-forming] subunit alpha, mitochondrial
TcCLB.506937.40	Dynein heavy chain, putative (Fragment)					TcCLB.508445.20	Superoxide dismutase
TcCLB.504109.80	Uncharacterized protein					TcCLB.504003.60	T-complex protein 1 subunit gamma
						TcCLB.503555.30	Trypanothione reductase, putative
						TcCLB.507259.10	Tryparedoxin peroxidase, putative
						TcCLB.508737.210	Uncharacterized protein
						TcCLB.511303.150	Uncharacterized protein
						TcCLB.511737.10	Uncharacterized protein
						TcCLB.508955.20	Uncharacterized protein
						TcCLB.508153.1050	Uncharacterized protein
						TcCLB.511421.200	Uncharacterized protein
						TcCLB.509033.80	Uncharacterized protein
						TcCLB.506303.80	Uncharacterized protein
						TcCLB.504741.240	Uncharacterized protein
						TcCLB.511211.110	Uncharacterized protein
						TcCLB.508299.20	Uncharacterized protein
						TcCLB.503991.10	Uncharacterized protein
						TcCLB.509551.70	Uncharacterized protein
						TcCLB.506931.20	Uncharacterized protein
						TcCLB.509791.140	Uncharacterized protein
						TcCLB.506865.50	Uncharacterized protein
						TcCLB.506835.10	Uncharacterized protein
						TcCLB.511901.30	Uncharacterized protein
						TcCLB.511859.70	Uncharacterized protein
						TcCLB.510879.210	Uncharacterized protein
						TcCLB.509671.110	Uncharacterized protein
						TcCLB.511807.190	Uncharacterized protein
						TcCLB.510357.130	Uncharacterized protein
						TcCLB.506753.230	Uncharacterized protein
						TcCLB.503479.70	Uncharacterized protein
						TcCLB.508045.70	Uncharacterized protein
						TcCLB.510099.20	Uncharacterized protein
						TcCLB.511003.30	Uncharacterized protein
						TcCLB.511295.50	Uncharacterized protein
						TcCLB.508727.50	Uncharacterized protein
						TcCLB.507949.250	Uncharacterized protein
						TcCLB.506041.20	Uncharacterized protein
						TcCLB.411427.30	Uncharacterized protein
						TcCLB.511309.70	Uncharacterized protein
						TcCLB.507081.120	Uncharacterized protein
						TcCLB.508839.80	Uncharacterized protein
						TcCLB.508711.40	Uncharacterized protein
						TcCLB.506739.170	Uncharacterized protein
						TcCLB.511639.20	Uncharacterized protein
						TcCLB.509437.70	Uncharacterized protein
						TcCLB.508397.40	Uncharacterized protein
						TcCLB.509429.120	Uncharacterized protein
						TcCLB.503511.10	Uncharacterized protein
						TcCLB.506559.500	Uncharacterized protein
						TcCLB.511519.9	Uncharacterized protein (Fragment)
						TcCLB.511209.10	Vacuolar ATP synthase subunit B, putative

## Sheet: Under-represented proteins
	Pd-dppf-mpo under-represented soluble and insoluble proteins				Pt-dppf-mpo under-represented soluble and insoluble proteins
133 elements included exclusively in under-represented proteins in Pd-dppf-mpo			81 common elements in under-represented proteins between Pd-dppf-mpo and Pt-dppf-mpo			154 elements included exclusively in under-represented proteins in Pt-dppf-mpo
Gene ID	Description		Gene ID	Description		Gene ID	Description
TcCLB.506413.20	40S ribosomal protein S33, putative		TcCLB.507671.30	25 kDa translation elongation factor 1-beta		TcCLB.503793.10	#REF!
TcCLB.510663.19	60S ribosomal subunit protein L31, putative		TcCLB.510943.80	ABC transporter, putative		TcCLB.457251.10	#REF!
TcCLB.507099.80	ABC transporter, putative		TcCLB.504867.20	ABC transporter, putative		TcCLB.508231.20	#REF!
TcCLB.510149.80	ABC transporter, putative		TcCLB.510105.170	Acetyltransferase component of pyruvate dehydrogenase complex		TcCLB.503395.50	#REF!
TcCLB.511021.70	ABC transporter, putative		TcCLB.509717.20	Acetyltransferase component of pyruvate dehydrogenase complex		TcCLB.507817.80	#REF!
TcCLB.509331.200	ABC transporter, putative		TcCLB.508831.120	Acetyltransferase, putative		TcCLB.509165.40	#REF!
TcCLB.504057.140	ADP/ATP mitochondrial carrier protein, putative		TcCLB.507585.10	Amino acid transporter, putative		TcCLB.504121.39	#REF!
TcCLB.511249.10	ADP/ATP mitochondrial carrier protein, putative		TcCLB.506945.240	ATP synthase, epsilon chain, putative		TcCLB.504121.30	#REF!
TcCLB.508153.60	Aminopeptidase		TcCLB.510801.10	Calpain-like cysteineptidase, putative (Fragment)		TcCLB.506579.10	#REF!
TcCLB.511051.70	Aminopeptidase, putative		TcCLB.506211.240	Clathrin light chain		TcCLB.507241.39	#REF!
TcCLB.504115.30	Beta galactofuranosyl glycosyltransferase, putative		TcCLB.510687.149	Coatomer alpha subunit, putative (Fragment)		TcCLB.508971.40	#REF!
TcCLB.509749.10	Biotin/lipoate protein ligase, putative		TcCLB.511529.68	Cyclin-dependent kinases regulatory subunit		TcCLB.511867.140	#REF!
TcCLB.509777.70	Calcium-transporting ATPase		TcCLB.511907.200	Cysteine peptidase inhibitor, putative		TcCLB.507519.140	#REF!
TcCLB.509003.40	Calpain-like cysteine peptidase, putative		TcCLB.504069.20	Cytochrome C oxidase subunit VI, putative		TcCLB.506605.59	#REF!
TcCLB.508675.29	Calpain-like cysteine peptidase, putative		TcCLB.510307.330	Dispersed gene family protein 1 (DGF-1), putative		TcCLB.510575.180	#REF!
TcCLB.509597.20	Carbonic anhydrase-like protein, putative		TcCLB.510607.80	Dispersed gene family protein 1 (DGF-1), putative		TcCLB.509683.130	#REF!
TcCLB.510761.60	Casein kinase II, putative		TcCLB.508879.30	Dynein heavy chain, putative		TcCLB.506691.14	#REF!
TcCLB.503843.40	Chaperone DnaJ protein, putative (Fragment)		TcCLB.508257.170	Dynein heavy chain, putative		TcCLB.511313.40	#REF!
TcCLB.511287.160	Clathrin light chain		TcCLB.511725.180	Dynein, putative		TcCLB.511717.170	#REF!
TcCLB.511691.20	Cystathionine beta-synthase		TcCLB.509445.30	Farnesyl synthetase, putative		TcCLB.507483.50	#REF!
TcCLB.508177.110	Cystathionine beta-synthase		TcCLB.506829.100	Fatty acyl CoA syntetase 1, putative		TcCLB.507483.30	#REF!
TcCLB.508177.129	Cystathionine beta-synthase, putative		TcCLB.510655.30	Helicase, putative		TcCLB.505985.9	#REF!
TcCLB.510381.10	Cystathionine beta-synthase, putative		TcCLB.509693.80	Hypoxanthine-guanine phosphoribosyltransferase, putative		TcCLB.506721.30	#REF!
TcCLB.509401.30	Cysteine peptidase, putative		TcCLB.510315.10	Inosine-adenosine-guanosine-nucleoside hydrolase, putative		TcCLB.508323.60	#REF!
TcCLB.507949.4	Cytidine triphosphate synthase, putative (Fragment)		TcCLB.508895.80	Intraflagellar transport protein component, putative		TcCLB.506167.50	#REF!
TcCLB.506263.20	D-isomer specific 2-hydroxyacid dehydrogenase-protein, putative		TcCLB.508153.330	Katanin-like protein, putative		TcCLB.503581.39	#REF!
TcCLB.511381.40	DNA-directed RNA polymerase I largest subunit, putative		TcCLB.506211.114	Kinesin-like protein		TcCLB.506753.110	#REF!
TcCLB.504203.60	DNA-J protein, putative (Fragment)		TcCLB.509247.50	Methionyl-tRNA synthetase, putative		TcCLB.508651.20	#REF!
TcCLB.506925.104	Dynein light chain, putative		TcCLB.506203.129	Mitochondrial DNA-directed RNA polymerase, putative (Fragment)		TcCLB.511145.10	#REF!
TcCLB.511277.70	Elongation factor TU, putative		TcCLB.506839.70	NADH dehydrogenase, putative		TcCLB.510351.90	#REF!
TcCLB.506661.30	Elongation of fatty acids protein		TcCLB.504017.10	Nascent polypeptide-associated complex subunit beta		TcCLB.506263.30	#REF!
TcCLB.508041.60	Eukaryotic release factor 3, putative		TcCLB.506247.70	Nuclear pore complex protein (NUP155), putative		TcCLB.508277.370	#REF!
TcCLB.503945.10	Eukaryotic translation initiation factor 1A, putative (Fragment)		TcCLB.508173.180	Nuclear transport factor 2 protein(NFT2), putative		TcCLB.509585.10	#REF!
TcCLB.511391.120	Glutamamyl carboxypeptidase, putative		TcCLB.507583.20	Nucleolar protein, putative		TcCLB.508689.20	#REF!
TcCLB.507669.150	Glycosomal membrane protein, putative		TcCLB.507649.80	Nucleolar RNA-binding protein, putative		TcCLB.506925.120	#REF!
TcCLB.510877.180	Glycosylphosphatidylinositol (GPI) anchor, putative		TcCLB.508405.30	Phosphatase-like protein, putative		TcCLB.511287.150	#REF!
TcCLB.503923.50	Glycosylphosphatidylinositol (GPI) anchor, putative (Fragment)		TcCLB.503513.40	Proteasome regulatory non-ATPase subunit 6, putative (Fragment)		TcCLB.510149.120	#REF!
TcCLB.506135.9	Heat shock 70 kDa protein, putative (Fragment)		TcCLB.509219.20	Retrotransposon hot spot (RHS) protein, putative		TcCLB.506633.90	#REF!
TcCLB.503721.39	Heat shock 70 kDa protein, putative (Fragment)		TcCLB.507167.240	Retrotransposon hot spot (RHS) protein, putative		TcCLB.506559.300	#REF!
TcCLB.504427.260	Kinesin-like protein		TcCLB.506327.90	Serine/threonine protein kinase, putative		TcCLB.511025.50	#REF!
TcCLB.509793.30	Kinetoplast DNA-associated protein, putative		TcCLB.507897.30	Serine/threonine-protein kinase A, putative		TcCLB.509445.39	#REF!
TcCLB.505183.30	Malic enzyme		TcCLB.507601.10	Serine/threonine-protein phosphatase		TcCLB.508175.370	#REF!
TcCLB.509551.30	Mitochondrial phosphate transporter, putative		TcCLB.511189.80	Small nuclear ribonucleoprotein SmD2, putative		TcCLB.510155.70	#REF!
TcCLB.509229.80	Mitochondrial processing peptidase alpha subunit, putative		TcCLB.508257.150	Small nuclear ribonucleoprotein SmD3, putative		TcCLB.509233.80	#REF!
TcCLB.506735.10	Mitochondrial processing peptidase alpha subunit, putative		TcCLB.506573.30	Tyrosyl or methionyl-tRNA synthetase, putative		TcCLB.506355.10	#REF!
TcCLB.506755.260	Mitochondrial RNA-binding protein 2, putative		TcCLB.509965.250	Ubiquitin fusion degradation protein 2, putative		TcCLB.508323.100	#REF!
TcCLB.510123.20	Mitogen activated protein kinase, putative		TcCLB.510409.39	Ubiquitin/ribosomal protein S27a, putative		TcCLB.506207.50	#REF!
TcCLB.507609.60	Myo-inositol-1-phosphate synthase, putative		TcCLB.503999.50	Ubiquitin-conjugating enzyme-like, putative		TcCLB.509797.40	#REF!
TcCLB.511527.70	Myosin heavy chain, putative		TcCLB.509247.30	Uncharacterized protein		TcCLB.507929.10	#REF!
TcCLB.509617.20	Paraflagellar rod protein 3, putative		TcCLB.507711.200	Uncharacterized protein		TcCLB.506239.30	#REF!
TcCLB.508461.140	Polyadenylate-binding protein		TcCLB.506357.130	Uncharacterized protein		TcCLB.511049.40	#REF!
TcCLB.511635.40	Protein tyrosine phosphatase, putative		TcCLB.504089.60	Uncharacterized protein		TcCLB.510649.24	#REF!
TcCLB.509759.19	Pumilio/PUF RNA binding protein 1, putative (Fragment)		TcCLB.507093.300	Uncharacterized protein		TcCLB.507795.10	#REF!
TcCLB.510125.10	Pumilio/PUF RNA binding protein 6, putative		TcCLB.503999.30	Uncharacterized protein		TcCLB.506491.20	#REF!
TcCLB.508479.120	Pumilio/PUF RNA binding protein 8, putative		TcCLB.508347.120	Uncharacterized protein		TcCLB.510215.10	#REF!
TcCLB.506811.160	R27-2 protein, putative		TcCLB.511381.60	Uncharacterized protein		TcCLB.506989.160	#REF!
TcCLB.504013.60	Regulatory subunit of protein kinase a-like protein, putative		TcCLB.509695.90	Uncharacterized protein		TcCLB.508299.70	#REF!
TcCLB.510879.50	Regulatory subunit of protein kinase a-like protein, putative		TcCLB.506825.210	Uncharacterized protein		TcCLB.511483.40	#REF!
TcCLB.511667.20	Retrotransposon hot spot (RHS) protein, putative		TcCLB.507511.40	Uncharacterized protein		TcCLB.510911.10	#REF!
TcCLB.504505.20	Retrotransposon hot spot (RHS) protein, putative		TcCLB.511409.10	Uncharacterized protein		TcCLB.506779.50	#REF!
TcCLB.510307.220	Retrotransposon hot spot (RHS) protein, putative		TcCLB.506517.149	Uncharacterized protein		TcCLB.509611.160	#REF!
TcCLB.506595.149	Retrotransposon hot spot (RHS) protein, putative (Fragment)		TcCLB.511807.200	Uncharacterized protein		TcCLB.509109.120	#REF!
TcCLB.509875.11	Retrotransposon hot spot (RHS) protein, putative (Fragment)		TcCLB.508045.70	Uncharacterized protein		TcCLB.510247.10	#REF!
TcCLB.508475.10	Ribosomal protein S20, putative		TcCLB.505943.40	Uncharacterized protein		TcCLB.509805.60	#REF!
TcCLB.509177.30	RNA cytidine acetyltransferase		TcCLB.508507.50	Uncharacterized protein		TcCLB.504109.200	#REF!
TcCLB.507511.30	RNA guanylyltransferase, putative		TcCLB.506753.230	Uncharacterized protein		TcCLB.507167.20	#REF!
TcCLB.506619.10	Sedoheptulose-1,6-bisphosphatase, putative		TcCLB.511535.20	Uncharacterized protein		TcCLB.510983.19	#REF!
TcCLB.506945.220	Serine/arginine-rich protein specific kinase SRPK, putative		TcCLB.510285.20	Uncharacterized protein		TcCLB.507501.10	#REF!
TcCLB.506297.350	S-phase kinase-associated protein, putative		TcCLB.510861.40	Uncharacterized protein		TcCLB.511101.19	#REF!
TcCLB.511511.150	Sphingosine phosphate lyase-like protein, putative		TcCLB.506465.14	Uncharacterized protein		TcCLB.507611.110	#REF!
TcCLB.509589.20	Squalene monooxygenase, putative		TcCLB.507771.90	Uncharacterized protein		TcCLB.507611.10	#REF!
TcCLB.511649.70	Structural maintenance of chromosomes protein		TcCLB.511807.290	Uncharacterized protein		TcCLB.508325.60	#REF!
TcCLB.511909.40	Succinate dehydrogenase [ubiquinone] flavoprotein subunit, mitochondrial		TcCLB.510431.220	Uncharacterized protein		TcCLB.509917.19	#REF!
TcCLB.511237.10	Thimet oligopeptidase, putative		TcCLB.507003.60	Uncharacterized protein		TcCLB.511277.160	#REF!
TcCLB.506411.10	Thimet oligopeptidase, putative		TcCLB.506829.90	Uncharacterized protein		TcCLB.506963.10	#REF!
TcCLB.511903.120	Transketolase		TcCLB.509693.170	Uncharacterized protein		TcCLB.510767.10	#REF!
TcCLB.507099.140	Transmembrane 9 superfamily member		TcCLB.510519.149	Uncharacterized protein (Fragment)		TcCLB.508119.144	#REF!
TcCLB.511583.40	Tricarboxylate carrier, putative		TcCLB.510861.14	Uncharacterized protein (Fragment)		TcCLB.506593.30	#REF!
TcCLB.509065.124	U6 snRNA-associated Sm-like protein LSm5p		TcCLB.511823.79	Uncharacterized protein (Fragment)		TcCLB.508307.170	#REF!
TcCLB.509167.80	Uncharacterized protein		TcCLB.507807.10	Uncharacterized protein (Fragment)		TcCLB.508989.30	#REF!
TcCLB.511293.90	Uncharacterized protein		TcCLB.509767.70	V-type proton ATPase subunit a		TcCLB.503715.30	#REF!
TcCLB.507895.124	Uncharacterized protein					TcCLB.510531.54	#REF!
TcCLB.509231.23	Uncharacterized protein					TcCLB.506577.120	#REF!
TcCLB.507159.30	Uncharacterized protein					TcCLB.509533.10	#REF!
TcCLB.505555.20	Uncharacterized protein					TcCLB.411235.9	#REF!
TcCLB.506925.14	Uncharacterized protein					TcCLB.511293.40	#REF!
TcCLB.509569.44	Uncharacterized protein					TcCLB.507053.100	#REF!
TcCLB.509509.50	Uncharacterized protein					TcCLB.508971.50	#REF!
TcCLB.510731.80	Uncharacterized protein					TcCLB.506425.40	#REF!
TcCLB.510339.54	Uncharacterized protein					TcCLB.508355.330	#REF!
TcCLB.506147.170	Uncharacterized protein					TcCLB.508153.1050	#REF!
TcCLB.504103.20	Uncharacterized protein					TcCLB.507933.10	#REF!
TcCLB.506357.120	Uncharacterized protein					TcCLB.485683.10	#REF!
TcCLB.508479.216	Uncharacterized protein					TcCLB.509563.50	#REF!
TcCLB.510103.24	Uncharacterized protein					TcCLB.503897.20	#REF!
TcCLB.509631.140	Uncharacterized protein					TcCLB.507681.210	#REF!
TcCLB.506367.174	Uncharacterized protein					TcCLB.506559.550	#REF!
TcCLB.506211.130	Uncharacterized protein					TcCLB.509049.40	#REF!
TcCLB.508805.20	Uncharacterized protein					TcCLB.510101.350	#REF!
TcCLB.510397.10	Uncharacterized protein					TcCLB.507765.130	#REF!
TcCLB.506587.70	Uncharacterized protein					TcCLB.508739.90	#REF!
TcCLB.509399.120	Uncharacterized protein					TcCLB.509671.10	#REF!
TcCLB.503789.70	Uncharacterized protein					TcCLB.503479.70	#REF!
TcCLB.506625.240	Uncharacterized protein					TcCLB.508647.110	#REF!
TcCLB.507765.100	Uncharacterized protein					TcCLB.507077.50	#REF!
TcCLB.510947.30	Uncharacterized protein					TcCLB.506145.40	#REF!
TcCLB.505171.60	Uncharacterized protein					TcCLB.511165.50	#REF!
TcCLB.511725.120	Uncharacterized protein					TcCLB.511809.90	#REF!
TcCLB.511807.250	Uncharacterized protein					TcCLB.506773.20	#REF!
TcCLB.510861.125	Uncharacterized protein					TcCLB.505073.10	#REF!
TcCLB.508837.130	Uncharacterized protein					TcCLB.508461.10	#REF!
TcCLB.509213.40	Uncharacterized protein					TcCLB.508879.80	#REF!
TcCLB.507769.30	Uncharacterized protein					TcCLB.424123.20	#REF!
TcCLB.508319.30	Uncharacterized protein					TcCLB.510357.130	#REF!
TcCLB.509649.50	Uncharacterized protein					TcCLB.507649.20	#REF!
TcCLB.504005.54	Uncharacterized protein					TcCLB.506435.150	#REF!
TcCLB.510089.210	Uncharacterized protein					TcCLB.508241.130	#REF!
TcCLB.507529.50	Uncharacterized protein					TcCLB.508601.100	#REF!
TcCLB.508323.20	Uncharacterized protein					TcCLB.511807.190	#REF!
TcCLB.508989.90	Uncharacterized protein					TcCLB.507927.100	#REF!
TcCLB.506513.100	Uncharacterized protein					TcCLB.509721.30	#REF!
TcCLB.506789.160	Uncharacterized protein					TcCLB.506177.10	#REF!
TcCLB.506127.150	Uncharacterized protein					TcCLB.509627.40	#REF!
TcCLB.507709.120	Uncharacterized protein					TcCLB.509837.10	#REF!
TcCLB.508231.170	Uncharacterized protein					TcCLB.509033.100	#REF!
TcCLB.504147.330	Uncharacterized protein					TcCLB.504427.140	#REF!
TcCLB.503593.30	Uncharacterized protein					TcCLB.508153.164	#REF!
TcCLB.506201.120	Uncharacterized protein					TcCLB.508699.20	#REF!
TcCLB.503565.10	Uncharacterized protein (Fragment)					TcCLB.510329.170	#REF!
TcCLB.504175.9	Uncharacterized protein (Fragment)					TcCLB.510885.160	#REF!
TcCLB.509761.10	Uncharacterized protein (Fragment)					TcCLB.503899.80	#REF!
TcCLB.511385.30	Vacuolar-type proton translocating pyrophosphatase 1, putative					TcCLB.510099.20	#REF!
TcCLB.507811.60	Vesicle-associated membrane protein, putative					TcCLB.510729.160	#REF!
						TcCLB.511751.160	#REF!
						TcCLB.508879.120	#REF!
						TcCLB.511577.44	#REF!
						TcCLB.511545.70	#REF!
						TcCLB.508355.160	#REF!
						TcCLB.506925.280	#REF!
						TcCLB.507073.40	#REF!
						TcCLB.510663.40	#REF!
						TcCLB.511311.80	#REF!
						TcCLB.509647.13	#REF!
						TcCLB.506697.80	#REF!
						TcCLB.504827.21	#REF!
						TcCLB.504703.20	#REF!
						TcCLB.511385.14	#REF!
						TcCLB.503681.9	#REF!
						TcCLB.510565.179	#REF!
						TcCLB.510771.9	#REF!
						TcCLB.507093.229	#REF!
						TcCLB.504045.110	#REF!
						TcCLB.508397.10	#REF!
						TcCLB.507969.10	#REF!

## Sheet: 155 specific Pt prot
155 elements included exclusively in over-represented proteins in Pt-dppf-mpo
Gene ID	Description
TcCLB.507017.40	2-hydroxy-3-oxopropionate reductase, putative
TcCLB.503935.20	2-oxoglutarate dehydrogenase, E2 component, dihydrolipoamide succinyltransferase, putative
TcCLB.506025.60	2-oxoglutarate dehydrogenase, E2 component, dihydrolipoamide succinyltransferase, putative
TcCLB.511529.160	3-hydroxyisobutyryl-CoA hydrolase, mitochondrial
TcCLB.506885.400	40 kDa cyclophilin, putative
TcCLB.511825.200	40S ribosomal protein L14, putative
TcCLB.506577.54	60S ribosomal protein L6
TcCLB.509717.20	Acetyltransferase component of pyruvate dehydrogenase complex
TcCLB.507001.80	Acyl-CoA dehydrogenase, putative
TcCLB.506195.80	Adenylate kinase, putative
TcCLB.508731.60	Adenylosuccinate synthetase 2
TcCLB.511511.170	ADP-ribosylation factor-like protein, putative
TcCLB.511497.19	Amastin, putative (Fragment)
TcCLB.511231.50	Aminomethyltransferase
TcCLB.507241.30	Arginine kinase, putative
TcCLB.506193.60	Ascorbate-dependent peroxidase, putative
TcCLB.511643.30	Aspartate carbamoyltransferase, putative
TcCLB.507091.50	Aspartate carbamoyltransferase, putative
TcCLB.509937.20	ATP-dependent (S)-NAD(P)H-hydrate dehydratase
TcCLB.506795.44	ATP-dependent (S)-NAD(P)H-hydrate dehydratase
TcCLB.468941.9	ATP-dependent DEAD/H RNA helicase, putative (Fragment)
TcCLB.506691.14	ATP-dependent DEAD/H RNA helicase, putative (Fragment)
TcCLB.511285.120	ATP-dependent RNA helicase, putative
TcCLB.506213.120	ATP-dependent RNA helicase, putative
TcCLB.508999.220	Calpain cysteine peptidase, putative
TcCLB.509003.40	Calpain-like cysteine peptidase, putative
TcCLB.504153.160	Carboxypeptidase, putative
TcCLB.511025.70	Chaperonin alpha subunit, putative
TcCLB.506247.50	Chaperonin, putative
TcCLB.509859.80	Coronin
TcCLB.511827.100	Cysteine peptidase C (CPC), putative
TcCLB.509719.40	Cytochrome P450, putative
TcCLB.506945.190	Cytochrome p450-like protein, putative
TcCLB.511025.110	Dihydrolipoyl dehydrogenase
TcCLB.507089.270	Dihydrolipoyl dehydrogenase
TcCLB.506445.60	DNA topoisomerase 2
TcCLB.509203.70	DNA topoisomerase 2
TcCLB.506493.80	DNA topoisomerase IA, putative
TcCLB.509951.49	DNA-directed RNA polymerase II subunit 2, putative (Fragment)
TcCLB.509543.50	DNAK protein, putative (Fragment)
TcCLB.509585.10	Dynein heavy chain, putative (Fragment)
TcCLB.402863.9	Dynein heavy chain, putative (Fragment)
TcCLB.506829.100	Fatty acyl CoA syntetase 1, putative
TcCLB.510151.10	Fatty acyl CoA syntetase 1, putative (Fragment)
TcCLB.510943.33	Fatty acyl CoA synthetase, putative
TcCLB.507669.10	Fumarate hydratase, putative
TcCLB.511727.300	GDP-L-fucose synthetase, putative
TcCLB.510187.100	Glucokinase 1, putative
TcCLB.506953.49	Glucose-6-phosphate 1-dehydrogenase, putative (Fragment)
TcCLB.506943.50	Glyceraldehyde-3-phosphate dehydrogenase
TcCLB.506925.470	Heat shock protein DnaJ, putative
TcCLB.504431.64	High mobility group protein, putative
TcCLB.506247.220	Histidine ammonia-lyase
TcCLB.505931.50	Histone H3, putative
TcCLB.511301.110	Inosine-5'-monophosphate dehydrogenase
TcCLB.509797.40	Isoleucyl-tRNA synthetase, putative
TcCLB.504427.260	Kinesin-like protein
TcCLB.508719.40	Kinetoplast DNA-associated protein, putative
TcCLB.510353.10	Major vault protein
TcCLB.510105.250	Membrane-bound acid phosphatase 2, putative
TcCLB.510105.210	Mitochondrial ATP-dependent zinc metallopeptidase, putative
TcCLB.504033.90	Mitochondrial carrier protein, putative
TcCLB.506491.20	Myosin heavy chain, putative (Fragment)
TcCLB.506821.210	NADH-cytochrome b5 reductase
TcCLB.510215.10	NADH-dependent fumarate reductase, putative
TcCLB.503849.60	NADH-dependent fumarate reductase, putative
TcCLB.503467.9	NADH-dependent fumarate reductase, putative (Fragment)
TcCLB.504425.60	NADP-dependent alcohol hydrogenase, putative
TcCLB.508677.80	NADP-dependent alcohol hydrogenase, putative
TcCLB.509979.150	Nitrilase, putative
TcCLB.507583.20	Nucleolar protein, putative
TcCLB.506229.50	Nucleoside phosphatase, putative
TcCLB.422189.10	Nucleoside phosphatase, putative (Fragment)
TcCLB.509053.70	p22 protein, putative
TcCLB.506585.70	p450 reductase, putative
TcCLB.509215.40	Peptidyl-prolyl cis-trans isomerase
TcCLB.508897.110	Peptidylprolyl isomerase
TcCLB.508479.230	Peroxin-2, putative
TcCLB.511277.210	Peroxisomal enoyl-coa hydratase, putative
TcCLB.508613.30	Peroxisomal membrane protein 4, putative
TcCLB.511419.40	Phosphoglycerate kinase
TcCLB.505999.100	Phosphoglycerate kinase
TcCLB.506945.20	Phosphoglycerate kinase
TcCLB.505999.90	Phosphoglycerate kinase
TcCLB.504153.20	Phosphoglycerate kinase
TcCLB.509261.10	p-nitrophenylphosphatase, putative
TcCLB.511469.70	Prohibitin, putative
TcCLB.506247.230	Prolyl oligopeptidase, putative
TcCLB.511287.49	Prostaglandin F synthase
TcCLB.509505.10	Protein disulfide isomerase, putative (Fragment)
TcCLB.507611.370	Protein disulfide-isomerase
TcCLB.508215.9	Protein kinase C substrate protein, heavy chain, putative
TcCLB.508387.20	Purine nucleoside phosphorylase
TcCLB.506789.280	Purine nucleoside phosphorylase
TcCLB.509059.50	Pyridoxal kinase, putative
TcCLB.510091.80	Pyruvate dehydrogenase E1 beta subunit, putative
TcCLB.510759.120	Reiske iron-sulfur protein, putative
TcCLB.509219.20	Retrotransposon hot spot (RHS) protein, putative
TcCLB.506139.200	Retrotransposon hot spot (RHS) protein, putative
TcCLB.508319.40	RNA helicase, putative
TcCLB.506211.70	RNA-binding protein, putative
TcCLB.506777.80	Seryl-tRNA synthetase, putative
TcCLB.509717.90	Short chain 3-hydroxyacyl-coa dehydrogenase, putative
TcCLB.511649.70	Structural maintenance of chromosomes protein
TcCLB.508479.340	Succinate--CoA ligase [ADP-forming] subunit alpha, mitochondrial
TcCLB.508445.20	Superoxide dismutase
TcCLB.504003.60	T-complex protein 1 subunit gamma
TcCLB.503555.30	Trypanothione reductase, putative
TcCLB.507259.10	Tryparedoxin peroxidase, putative
TcCLB.508737.210	Uncharacterized protein
TcCLB.511303.150	Uncharacterized protein
TcCLB.511737.10	Uncharacterized protein
TcCLB.508955.20	Uncharacterized protein
TcCLB.508153.1050	Uncharacterized protein
TcCLB.511421.200	Uncharacterized protein
TcCLB.509033.80	Uncharacterized protein
TcCLB.506303.80	Uncharacterized protein
TcCLB.504741.240	Uncharacterized protein
TcCLB.511211.110	Uncharacterized protein
TcCLB.508299.20	Uncharacterized protein
TcCLB.503991.10	Uncharacterized protein
TcCLB.509551.70	Uncharacterized protein
TcCLB.506931.20	Uncharacterized protein
TcCLB.509791.140	Uncharacterized protein
TcCLB.506865.50	Uncharacterized protein
TcCLB.506835.10	Uncharacterized protein
TcCLB.511901.30	Uncharacterized protein
TcCLB.511859.70	Uncharacterized protein
TcCLB.510879.210	Uncharacterized protein
TcCLB.509671.110	Uncharacterized protein
TcCLB.511807.190	Uncharacterized protein
TcCLB.510357.130	Uncharacterized protein
TcCLB.506753.230	Uncharacterized protein
TcCLB.503479.70	Uncharacterized protein
TcCLB.508045.70	Uncharacterized protein
TcCLB.510099.20	Uncharacterized protein
TcCLB.511003.30	Uncharacterized protein
TcCLB.511295.50	Uncharacterized protein
TcCLB.508727.50	Uncharacterized protein
TcCLB.507949.250	Uncharacterized protein
TcCLB.506041.20	Uncharacterized protein
TcCLB.411427.30	Uncharacterized protein
TcCLB.511309.70	Uncharacterized protein
TcCLB.507081.120	Uncharacterized protein
TcCLB.508839.80	Uncharacterized protein
TcCLB.508711.40	Uncharacterized protein
TcCLB.506739.170	Uncharacterized protein
TcCLB.511639.20	Uncharacterized protein
TcCLB.509437.70	Uncharacterized protein
TcCLB.508397.40	Uncharacterized protein
TcCLB.509429.120	Uncharacterized protein
TcCLB.503511.10	Uncharacterized protein
TcCLB.506559.500	Uncharacterized protein
TcCLB.511519.9	Uncharacterized protein (Fragment)
TcCLB.511209.10	Vacuolar ATP synthase subunit B, putative

## Sheet: 133 specific Pd proteins under
133 elements included exclusively in under-represented proteins in Pd-dppf-mpo
Gene ID	Description
TcCLB.506413.20	40S ribosomal protein S33, putative
TcCLB.510663.19	60S ribosomal subunit protein L31, putative
TcCLB.507099.80	ABC transporter, putative
TcCLB.510149.80	ABC transporter, putative
TcCLB.511021.70	ABC transporter, putative
TcCLB.509331.200	ABC transporter, putative
TcCLB.504057.140	ADP/ATP mitochondrial carrier protein, putative
TcCLB.511249.10	ADP/ATP mitochondrial carrier protein, putative
TcCLB.508153.60	Aminopeptidase
TcCLB.511051.70	Aminopeptidase, putative
TcCLB.504115.30	Beta galactofuranosyl glycosyltransferase, putative
TcCLB.509749.10	Biotin/lipoate protein ligase, putative
TcCLB.509777.70	Calcium-transporting ATPase
TcCLB.509003.40	Calpain-like cysteine peptidase, putative
TcCLB.508675.29	Calpain-like cysteine peptidase, putative
TcCLB.509597.20	Carbonic anhydrase-like protein, putative
TcCLB.510761.60	Casein kinase II, putative
TcCLB.503843.40	Chaperone DnaJ protein, putative (Fragment)
TcCLB.511287.160	Clathrin light chain
TcCLB.511691.20	Cystathionine beta-synthase
TcCLB.508177.110	Cystathionine beta-synthase
TcCLB.508177.129	Cystathionine beta-synthase, putative
TcCLB.510381.10	Cystathionine beta-synthase, putative
TcCLB.509401.30	Cysteine peptidase, putative
TcCLB.507949.4	Cytidine triphosphate synthase, putative (Fragment)
TcCLB.506263.20	D-isomer specific 2-hydroxyacid dehydrogenase-protein, putative
TcCLB.511381.40	DNA-directed RNA polymerase I largest subunit, putative
TcCLB.504203.60	DNA-J protein, putative (Fragment)
TcCLB.506925.104	Dynein light chain, putative
TcCLB.511277.70	Elongation factor TU, putative
TcCLB.506661.30	Elongation of fatty acids protein
TcCLB.508041.60	Eukaryotic release factor 3, putative
TcCLB.503945.10	Eukaryotic translation initiation factor 1A, putative (Fragment)
TcCLB.511391.120	Glutamamyl carboxypeptidase, putative
TcCLB.507669.150	Glycosomal membrane protein, putative
TcCLB.510877.180	Glycosylphosphatidylinositol (GPI) anchor, putative
TcCLB.503923.50	Glycosylphosphatidylinositol (GPI) anchor, putative (Fragment)
TcCLB.506135.9	Heat shock 70 kDa protein, putative (Fragment)
TcCLB.503721.39	Heat shock 70 kDa protein, putative (Fragment)
TcCLB.504427.260	Kinesin-like protein
TcCLB.509793.30	Kinetoplast DNA-associated protein, putative
TcCLB.505183.30	Malic enzyme
TcCLB.509551.30	Mitochondrial phosphate transporter, putative
TcCLB.509229.80	Mitochondrial processing peptidase alpha subunit, putative
TcCLB.506735.10	Mitochondrial processing peptidase alpha subunit, putative
TcCLB.506755.260	Mitochondrial RNA-binding protein 2, putative
TcCLB.510123.20	Mitogen activated protein kinase, putative
TcCLB.507609.60	Myo-inositol-1-phosphate synthase, putative
TcCLB.511527.70	Myosin heavy chain, putative
TcCLB.509617.20	Paraflagellar rod protein 3, putative
TcCLB.508461.140	Polyadenylate-binding protein
TcCLB.511635.40	Protein tyrosine phosphatase, putative
TcCLB.509759.19	Pumilio/PUF RNA binding protein 1, putative (Fragment)
TcCLB.510125.10	Pumilio/PUF RNA binding protein 6, putative
TcCLB.508479.120	Pumilio/PUF RNA binding protein 8, putative
TcCLB.506811.160	R27-2 protein, putative
TcCLB.504013.60	Regulatory subunit of protein kinase a-like protein, putative
TcCLB.510879.50	Regulatory subunit of protein kinase a-like protein, putative
TcCLB.511667.20	Retrotransposon hot spot (RHS) protein, putative
TcCLB.504505.20	Retrotransposon hot spot (RHS) protein, putative
TcCLB.510307.220	Retrotransposon hot spot (RHS) protein, putative
TcCLB.506595.149	Retrotransposon hot spot (RHS) protein, putative (Fragment)
TcCLB.509875.11	Retrotransposon hot spot (RHS) protein, putative (Fragment)
TcCLB.508475.10	Ribosomal protein S20, putative
TcCLB.509177.30	RNA cytidine acetyltransferase
TcCLB.507511.30	RNA guanylyltransferase, putative
TcCLB.506619.10	Sedoheptulose-1,6-bisphosphatase, putative
TcCLB.506945.220	Serine/arginine-rich protein specific kinase SRPK, putative
TcCLB.506297.350	S-phase kinase-associated protein, putative
TcCLB.511511.150	Sphingosine phosphate lyase-like protein, putative
TcCLB.509589.20	Squalene monooxygenase, putative
TcCLB.511649.70	Structural maintenance of chromosomes protein
TcCLB.511909.40	Succinate dehydrogenase [ubiquinone] flavoprotein subunit, mitochondrial
TcCLB.511237.10	Thimet oligopeptidase, putative
TcCLB.506411.10	Thimet oligopeptidase, putative
TcCLB.511903.120	Transketolase
TcCLB.507099.140	Transmembrane 9 superfamily member
TcCLB.511583.40	Tricarboxylate carrier, putative
TcCLB.509065.124	U6 snRNA-associated Sm-like protein LSm5p
TcCLB.509167.80	Uncharacterized protein
TcCLB.511293.90	Uncharacterized protein
TcCLB.507895.124	Uncharacterized protein
TcCLB.509231.23	Uncharacterized protein
TcCLB.507159.30	Uncharacterized protein
TcCLB.505555.20	Uncharacterized protein
TcCLB.506925.14	Uncharacterized protein
TcCLB.509569.44	Uncharacterized protein
TcCLB.509509.50	Uncharacterized protein
TcCLB.510731.80	Uncharacterized protein
TcCLB.510339.54	Uncharacterized protein
TcCLB.506147.170	Uncharacterized protein
TcCLB.504103.20	Uncharacterized protein
TcCLB.506357.120	Uncharacterized protein
TcCLB.508479.216	Uncharacterized protein
TcCLB.510103.24	Uncharacterized protein
TcCLB.509631.140	Uncharacterized protein
TcCLB.506367.174	Uncharacterized protein
TcCLB.506211.130	Uncharacterized protein
TcCLB.508805.20	Uncharacterized protein
TcCLB.510397.10	Uncharacterized protein
TcCLB.506587.70	Uncharacterized protein
TcCLB.509399.120	Uncharacterized protein
TcCLB.503789.70	Uncharacterized protein
TcCLB.506625.240	Uncharacterized protein
TcCLB.507765.100	Uncharacterized protein
TcCLB.510947.30	Uncharacterized protein
TcCLB.505171.60	Uncharacterized protein
TcCLB.511725.120	Uncharacterized protein
TcCLB.511807.250	Uncharacterized protein
TcCLB.510861.125	Uncharacterized protein
TcCLB.508837.130	Uncharacterized protein
TcCLB.509213.40	Uncharacterized protein
TcCLB.507769.30	Uncharacterized protein
TcCLB.508319.30	Uncharacterized protein
TcCLB.509649.50	Uncharacterized protein
TcCLB.504005.54	Uncharacterized protein
TcCLB.510089.210	Uncharacterized protein
TcCLB.507529.50	Uncharacterized protein
TcCLB.508323.20	Uncharacterized protein
TcCLB.508989.90	Uncharacterized protein
TcCLB.506513.100	Uncharacterized protein
TcCLB.506789.160	Uncharacterized protein
TcCLB.506127.150	Uncharacterized protein
TcCLB.507709.120	Uncharacterized protein
TcCLB.508231.170	Uncharacterized protein
TcCLB.504147.330	Uncharacterized protein
TcCLB.503593.30	Uncharacterized protein
TcCLB.506201.120	Uncharacterized protein
TcCLB.503565.10	Uncharacterized protein (Fragment)
TcCLB.504175.9	Uncharacterized protein (Fragment)
TcCLB.509761.10	Uncharacterized protein (Fragment)
TcCLB.511385.30	Vacuolar-type proton translocating pyrophosphatase 1, putative
TcCLB.507811.60	Vesicle-associated membrane protein, putative

## Sheet: 154 specific Pt proteins under
154 elements included exclusively in under-represented proteins in Pt-dppf-mpo
Gene ID	Description
TcCLB.503793.10	#REF!
TcCLB.457251.10	#REF!
TcCLB.508231.20	#REF!
TcCLB.503395.50	#REF!
TcCLB.507817.80	#REF!
TcCLB.509165.40	#REF!
TcCLB.504121.39	#REF!
TcCLB.504121.30	#REF!
TcCLB.506579.10	#REF!
TcCLB.507241.39	#REF!
TcCLB.508971.40	#REF!
TcCLB.511867.140	#REF!
TcCLB.507519.140	#REF!
TcCLB.506605.59	#REF!
TcCLB.510575.180	#REF!
TcCLB.509683.130	#REF!
TcCLB.506691.14	#REF!
TcCLB.511313.40	#REF!
TcCLB.511717.170	#REF!
TcCLB.507483.50	#REF!
TcCLB.507483.30	#REF!
TcCLB.505985.9	#REF!
TcCLB.506721.30	#REF!
TcCLB.508323.60	#REF!
TcCLB.506167.50	#REF!
TcCLB.503581.39	#REF!
TcCLB.506753.110	#REF!
TcCLB.508651.20	#REF!
TcCLB.511145.10	#REF!
TcCLB.510351.90	#REF!
TcCLB.506263.30	#REF!
TcCLB.508277.370	#REF!
TcCLB.509585.10	#REF!
TcCLB.508689.20	#REF!
TcCLB.506925.120	#REF!
TcCLB.511287.150	#REF!
TcCLB.510149.120	#REF!
TcCLB.506633.90	#REF!
TcCLB.506559.300	#REF!
TcCLB.511025.50	#REF!
TcCLB.509445.39	#REF!
TcCLB.508175.370	#REF!
TcCLB.510155.70	#REF!
TcCLB.509233.80	#REF!
TcCLB.506355.10	#REF!
TcCLB.508323.100	#REF!
TcCLB.506207.50	#REF!
TcCLB.509797.40	#REF!
TcCLB.507929.10	#REF!
TcCLB.506239.30	#REF!
TcCLB.511049.40	#REF!
TcCLB.510649.24	#REF!
TcCLB.507795.10	#REF!
TcCLB.506491.20	#REF!
TcCLB.510215.10	#REF!
TcCLB.506989.160	#REF!
TcCLB.508299.70	#REF!
TcCLB.511483.40	#REF!
TcCLB.510911.10	#REF!
TcCLB.506779.50	#REF!
TcCLB.509611.160	#REF!
TcCLB.509109.120	#REF!
TcCLB.510247.10	#REF!
TcCLB.509805.60	#REF!
TcCLB.504109.200	#REF!
TcCLB.507167.20	#REF!
TcCLB.510983.19	#REF!
TcCLB.507501.10	#REF!
TcCLB.511101.19	#REF!
TcCLB.507611.110	#REF!
TcCLB.507611.10	#REF!
TcCLB.508325.60	#REF!
TcCLB.509917.19	#REF!
TcCLB.511277.160	#REF!
TcCLB.506963.10	#REF!
TcCLB.510767.10	#REF!
TcCLB.508119.144	#REF!
TcCLB.506593.30	#REF!
TcCLB.508307.170	#REF!
TcCLB.508989.30	#REF!
TcCLB.503715.30	#REF!
TcCLB.510531.54	#REF!
TcCLB.506577.120	#REF!
TcCLB.509533.10	#REF!
TcCLB.411235.9	#REF!
TcCLB.511293.40	#REF!
TcCLB.507053.100	#REF!
TcCLB.508971.50	#REF!
TcCLB.506425.40	#REF!
TcCLB.508355.330	#REF!
TcCLB.508153.1050	#REF!
TcCLB.507933.10	#REF!
TcCLB.485683.10	#REF!
TcCLB.509563.50	#REF!
TcCLB.503897.20	#REF!
TcCLB.507681.210	#REF!
TcCLB.506559.550	#REF!
TcCLB.509049.40	#REF!
TcCLB.510101.350	#REF!
TcCLB.507765.130	#REF!
TcCLB.508739.90	#REF!
TcCLB.509671.10	#REF!
TcCLB.503479.70	#REF!
TcCLB.508647.110	#REF!
TcCLB.507077.50	#REF!
TcCLB.506145.40	#REF!
TcCLB.511165.50	#REF!
TcCLB.511809.90	#REF!
TcCLB.506773.20	#REF!
TcCLB.505073.10	#REF!
TcCLB.508461.10	#REF!
TcCLB.508879.80	#REF!
TcCLB.424123.20	#REF!
TcCLB.510357.130	#REF!
TcCLB.507649.20	#REF!
TcCLB.506435.150	#REF!
TcCLB.508241.130	#REF!
TcCLB.508601.100	#REF!
TcCLB.511807.190	#REF!
TcCLB.507927.100	#REF!
TcCLB.509721.30	#REF!
TcCLB.506177.10	#REF!
TcCLB.509627.40	#REF!
TcCLB.509837.10	#REF!
TcCLB.509033.100	#REF!
TcCLB.504427.140	#REF!
TcCLB.508153.164	#REF!
TcCLB.508699.20	#REF!
TcCLB.510329.170	#REF!
TcCLB.510885.160	#REF!
TcCLB.503899.80	#REF!
TcCLB.510099.20	#REF!
TcCLB.510729.160	#REF!
TcCLB.511751.160	#REF!
TcCLB.508879.120	#REF!
TcCLB.511577.44	#REF!
TcCLB.511545.70	#REF!
TcCLB.508355.160	#REF!
TcCLB.506925.280	#REF!
TcCLB.507073.40	#REF!
TcCLB.510663.40	#REF!
TcCLB.511311.80	#REF!
TcCLB.509647.13	#REF!
TcCLB.506697.80	#REF!
TcCLB.504827.21	#REF!
TcCLB.504703.20	#REF!
TcCLB.511385.14	#REF!
TcCLB.503681.9	#REF!
TcCLB.510565.179	#REF!
TcCLB.510771.9	#REF!
TcCLB.507093.229	#REF!
TcCLB.504045.110	#REF!
TcCLB.508397.10	#REF!
TcCLB.507969.10	#REF!
