# Supplementary material for: Comparative high-throughput analysis of the Trypanosoma cruzi response to organometallic compounds
Source: Royal Society of Chemistry journal article supplement (doi:10.1039/d0mt00030b), 2020-03-24
Supplement: d0mt00030b9.xlsx [file d0mt00030b9.xlsx]

## Sheet: Pd-dppf-mpo
Pd-dppf-mpo
KEGG PATHWAYS
#term ID	term description	observed gene count	background gene count	false discovery rate	matching proteins in your network (IDs)
tcr03010	Ribosome	19	164	1.88e-08	XP_803249.1,XP_806954.1,XP_808034.1,XP_808072.1,XP_808341.1,XP_808676.1,XP_809485.1,XP_809990.1,XP_810252.1,XP_811890.1,XP_812750.1,XP_814693.1,XP_814844.1,XP_816099.1,XP_817770.1,XP_819305.1,XP_819714.1,XP_821643.1,XP_822076.1
tcr01130	Biosynthesis of antibiotics	18	236	1.06e-05	XP_804871.1,XP_807301.1,XP_808051.1,XP_808343.1,XP_809370.1,XP_809424.1,XP_810144.1,XP_812998.1,XP_813077.1,XP_813368.1,XP_814301.1,XP_815562.1,XP_816701.1,XP_817911.1,XP_817929.1,XP_819244.1,XP_819893.1,XP_819900.1
tcr01100	Metabolic pathways	30	629	1.84e-05	XP_803990.1,XP_804829.1,XP_804871.1,XP_805772.1,XP_807301.1,XP_808051.1,XP_808084.1,XP_808343.1,XP_809370.1,XP_809424.1,XP_810144.1,XP_811506.1,XP_812351.1,XP_812569.1,XP_812624.1,XP_812998.1,XP_813077.1,XP_813368.1,XP_814301.1,XP_815327.1,XP_815562.1,XP_816701.1,XP_817268.1,XP_817581.1,XP_817911.1,XP_817929.1,XP_818987.1,XP_819244.1,XP_819893.1,XP_819900.1
tcr01110	Biosynthesis of secondary metabolites	16	255	0.00025	XP_805387.1,XP_805772.1,XP_808051.1,XP_808343.1,XP_809370.1,XP_809424.1,XP_810144.1,XP_813368.1,XP_814301.1,XP_815562.1,XP_816701.1,XP_817911.1,XP_817929.1,XP_819244.1,XP_819893.1,XP_819900.1
tcr01200	Carbon metabolism	10	130	0.0017	XP_808051.1,XP_809370.1,XP_809424.1,XP_812624.1,XP_813368.1,XP_814410.1,XP_815562.1,XP_817929.1,XP_819244.1,XP_819893.1
tcr01230	Biosynthesis of amino acids	8	94	0.0034	XP_804871.1,XP_807301.1,XP_809370.1,XP_812998.1,XP_813368.1,XP_817911.1,XP_817929.1,XP_819244.1
tcr00190	Oxidative phosphorylation	6	64	0.0103	XP_809424.1,XP_811506.1,XP_812197.1,XP_814868.1,XP_817268.1,XP_818987.1
tcr00071	Fatty acid degradation	4	27	0.0135	XP_805507.1,XP_812351.1,XP_814301.1,XP_819900.1
tcr00260	Glycine, serine and threonine metabolism	4	29	0.0152	XP_804871.1,XP_807301.1,XP_808051.1,XP_812998.1
tcr01212	Fatty acid metabolism	4	29	0.0152	XP_805387.1,XP_812351.1,XP_814301.1,XP_819900.1
tcr03040	Spliceosome	5	57	0.0219	XP_810555.1,XP_810822.1,XP_817079.1,XP_817743.1,XP_818947.1
tcr04144	Endocytosis	5	59	0.0231	XP_809460.1,XP_810463.1,XP_816198.1,XP_817743.1,XP_822080.1
tcr00020	Citrate cycle (TCA cycle)	4	42	0.0353	XP_809424.1,XP_813368.1,XP_815562.1,XP_819893.1
tcr00062	Fatty acid elongation	2	6	0.0353	XP_805387.1,XP_819900.1
tcr00670	One carbon pool by folate	2	6	0.0353	XP_808051.1,XP_815327.1
tcr03008	Ribosome biogenesis in eukaryotes	5	72	0.0376	XP_806942.1,XP_807901.1,XP_813341.1,XP_814276.1,XP_818275.1
tcr03050	Proteasome	4	47	0.0388	XP_804065.1,XP_808230.1,XP_811519.1,XP_821537.1
tcr00230	Purine metabolism	6	109	0.0458	XP_804829.1,XP_805772.1,XP_808084.1,XP_810144.1,XP_812569.1,XP_819244.1
UNIPROT KEYWORDS
#term ID	term description	observed gene count	background gene count	false discovery rate	matching proteins in your network (IDs)
IPR017871	ABC transporter, conserved site	6	30	0.0161	XP_811319.1,XP_812776.1,XP_813909.1,XP_816786.1,XP_817081.1,XP_817325.1
IPR027417	P-loop containing nucleoside triphosphate hydrolase	31	811	0.0161	XP_805569.1,XP_806977.1,XP_807033.1,XP_808655.1,XP_808927.1,XP_808928.1,XP_809290.1,XP_809544.1,XP_809654.1,XP_810144.1,XP_810463.1,XP_810822.1,XP_811319.1,XP_812350.1,XP_812776.1,XP_813112.1,XP_813280.1,XP_813909.1,XP_815055.1,XP_816786.1,XP_816802.1,XP_817081.1,XP_817170.1,XP_817325.1,XP_818949.1,XP_819040.1,XP_819469.1,XP_819493.1,XP_821480.1,XP_821877.1,XP_822080.1
INTERPRO PROTEIN DOMAINS AND FEATURES
#term ID	term description	observed gene count	background	false discovery rate	matching proteins in your network (labels)
IPR017871	ABC transporter, conserved site	6	30	0.0161	XP_811319.1,XP_812776.1,XP_813909.1,XP_816786.1,XP_817081.1,XP_817325.1
IPR027417	P-loop containing nucleoside triphosphate hydrolase	31	811	0.0161	XP_805569.1,XP_806977.1,XP_807033.1,XP_808655.1,XP_808927.1,XP_808928.1,XP_809290.1,XP_809544.1,XP_809654.1,XP_810144.1,XP_810463.1,XP_810822.1,XP_811319.1,XP_812350.1,XP_812776.1,XP_813112.1,XP_813280.1,XP_813909.1,XP_815055.1,XP_816786.1,XP_816802.1,XP_817081.1,XP_817170.1,XP_817325.1,XP_818949.1,XP_819040.1,XP_819469.1,XP_819493.1,XP_821480.1,XP_821877.1,XP_822080.1

## Sheet: Pt-dppf-mpo
Pt-dppf-mpo
KEGG PATHWAYS
#term ID	term description	observed gene count	background gene count	false discovery rate	matching proteins in your network (IDs)
tcr01100	Metabolic pathways	56	629	6.19e-18	XP_802803.1,XP_802926.1,XP_803343.1,XP_804809.1,XP_804829.1,XP_805296.1,XP_805772.1,XP_806628.1,XP_806915.1,XP_807238.1,XP_808145.1,XP_808326.1,XP_808891.1,XP_809370.1,XP_810456.1,XP_810844.1,XP_810899.1,XP_811134.1,XP_811506.1,XP_811646.1,XP_812138.1,XP_812288.1,XP_812294.1,XP_812351.1,XP_812791.1,XP_813083.1,XP_813190.1,XP_813368.1,XP_813605.1,XP_814961.1,XP_815360.1,XP_815489.1,XP_815562.1,XP_…
tcr01110	Biosynthesis of secondary metabolites	28	255	7.78e-11	XP_802815.1,XP_803343.1,XP_805772.1,XP_807238.1,XP_808145.1,XP_808326.1,XP_809370.1,XP_810456.1,XP_810844.1,XP_811646.1,XP_812138.1,XP_812294.1,XP_813190.1,XP_813368.1,XP_815360.1,XP_815489.1,XP_815562.1,XP_815569.1,XP_816060.1,XP_816061.1,XP_817100.1,XP_818792.1,XP_818982.1,XP_819102.1,XP_819893.1,XP_819900.1,XP_820834.1,XP_821474.1
tcr01130	Biosynthesis of antibiotics	25	236	1.61e-09	XP_803343.1,XP_807238.1,XP_808145.1,XP_808326.1,XP_809370.1,XP_810456.1,XP_810844.1,XP_811646.1,XP_812138.1,XP_812294.1,XP_813190.1,XP_813368.1,XP_815360.1,XP_815562.1,XP_815569.1,XP_816060.1,XP_816061.1,XP_816888.1,XP_817100.1,XP_818792.1,XP_819102.1,XP_819893.1,XP_819900.1,XP_820834.1,XP_821474.1
tcr01200	Carbon metabolism	18	130	1.25e-08	XP_803343.1,XP_807238.1,XP_808145.1,XP_808326.1,XP_809370.1,XP_811646.1,XP_812138.1,XP_812294.1,XP_813368.1,XP_815562.1,XP_815734.1,XP_816060.1,XP_816061.1,XP_817100.1,XP_818792.1,XP_819893.1,XP_820834.1,XP_821474.1
tcr00010	Glycolysis / Gluconeogenesis	12	63	3.08e-07	XP_808145.1,XP_809370.1,XP_811646.1,XP_812138.1,XP_812294.1,XP_813190.1,XP_815562.1,XP_816060.1,XP_816061.1,XP_818792.1,XP_819893.1,XP_821474.1
tcr00020	Citrate cycle (TCA cycle)	10	42	6.21e-07	XP_803343.1,XP_808326.1,XP_811646.1,XP_812294.1,XP_813368.1,XP_815562.1,XP_817100.1,XP_818792.1,XP_819893.1,XP_820834.1
tcr04146	Peroxisome	9	42	5.36e-06	XP_802926.1,XP_809291.1,XP_811023.1,XP_812351.1,XP_813368.1,XP_817096.1,XP_818649.1,XP_820797.1,XP_820860.1
tcr01212	Fatty acid metabolism	6	29	0.00044	XP_802815.1,XP_802926.1,XP_812351.1,XP_815569.1,XP_817096.1,XP_819900.1
tcr00190	Oxidative phosphorylation	8	64	0.00059	XP_806915.1,XP_808891.1,XP_811506.1,XP_812197.1,XP_814961.1,XP_817234.1,XP_817268.1,XP_818987.1
tcr00280	Valine, leucine and isoleucine degradation	6	38	0.0013	XP_810844.1,XP_812294.1,XP_815569.1,XP_815734.1,XP_818792.1,XP_819900.1
tcr03010	Ribosome	12	164	0.0013	XP_804516.1,XP_805416.1,XP_805728.1,XP_806207.1,XP_808341.1,XP_811572.1,XP_813855.1,XP_816521.1,XP_816895.1,XP_818604.1,XP_821576.1,XP_821884.1
tcr00640	Propanoate metabolism	5	26	0.0017	XP_810844.1,XP_812294.1,XP_815734.1,XP_818792.1,XP_820834.1
tcr00071	Fatty acid degradation	5	27	0.0018	XP_802926.1,XP_812351.1,XP_815569.1,XP_817096.1,XP_819900.1
tcr00250	Alanine, aspartate and glutamate metabolism	5	27	0.0018	XP_806628.1,XP_812791.1,XP_813605.1,XP_820791.1,XP_820989.1
tcr00310	Lysine degradation	4	14	0.0018	XP_803343.1,XP_808326.1,XP_815569.1,XP_819900.1
tcr00620	Pyruvate metabolism	6	46	0.0021	XP_811646.1,XP_812294.1,XP_815562.1,XP_817100.1,XP_818792.1,XP_819893.1
tcr00062	Fatty acid elongation	3	6	0.0022	XP_802815.1,XP_815569.1,XP_819900.1
tcr00630	Glyoxylate and dicarboxylate metabolism	5	30	0.0022	XP_807238.1,XP_812294.1,XP_813083.1,XP_818792.1,XP_820989.1
tcr01230	Biosynthesis of amino acids	8	94	0.0031	XP_808145.1,XP_809370.1,XP_810456.1,XP_812138.1,XP_813368.1,XP_816060.1,XP_816061.1,XP_820989.1
tcr00480	Glutathione metabolism	5	37	0.0043	XP_802803.1,XP_804882.1,XP_805296.1,XP_808649.1,XP_813368.1
tcr00230	Purine metabolism	8	109	0.0067	XP_804809.1,XP_804829.1,XP_805772.1,XP_806628.1,XP_815360.1,XP_815489.1,XP_816102.1,XP_819102.1
tcr00520	Amino sugar and nucleotide sugar metabolism	5	43	0.0071	XP_812288.1,XP_818926.1,XP_819302.1,XP_819351.1,XP_821474.1
tcr00061	Fatty acid biosynthesis	3	13	0.0097	XP_802926.1,XP_812351.1,XP_817096.1
tcr00380	Tryptophan metabolism	3	14	0.0111	XP_811054.1,XP_815569.1,XP_819900.1
tcr00910	Nitrogen metabolism	2	5	0.0189	XP_811054.1,XP_820989.1
tcr03040	Spliceosome	5	57	0.0189	XP_808002.1,XP_810555.1,XP_812917.1,XP_817743.1,XP_818947.1
tcr00970	Aminoacyl-tRNA biosynthesis	4	40	0.0255	XP_805515.1,XP_808554.1,XP_809978.1,XP_811974.1
tcr04145	Phagosome	4	40	0.0255	XP_802499.1,XP_806915.1,XP_808891.1,XP_817268.1
tcr00340	Histidine metabolism	2	7	0.0279	XP_811134.1,XP_820336.1
tcr00053	Ascorbate and aldarate metabolism	2	8	0.0333	XP_804882.1,XP_808649.1
tcr00730	Thiamine metabolism	2	10	0.0461	XP_815360.1,XP_819102.1
tcr00260	Glycine, serine and threonine metabolism	3	29	0.0491	XP_807238.1,XP_812294.1,XP_818792.1
UNIPROT KEYWORDS
#term ID	term description	observed gene count	background gene count	false discovery rate	matching proteins in your network (IDs)
KW-0560	Oxidoreductase	23	183	2.28e-09	XP_802803.1,XP_804882.1,XP_805296.1,XP_805772.1,XP_808649.1,XP_809291.1,XP_810346.1,XP_811475.1,XP_811646.1,XP_812138.1,XP_812197.1,XP_812294.1,XP_812975.1,XP_813083.1,XP_813368.1,XP_813955.1,XP_814362.1,XP_815489.1,XP_815994.1,XP_816888.1,XP_818792.1,XP_818982.1,XP_819351.1
KW-0547	Nucleotide-binding	42	734	1.79e-07	XP_802274.1,XP_802499.1,XP_804094.1,XP_805515.1,XP_805569.1,XP_806409.1,XP_806410.1,XP_806628.1,XP_808002.1,XP_808145.1,XP_808268.1,XP_808356.1,XP_808554.1,XP_809978.1,XP_810722.1,XP_810928.1,XP_811290.1,XP_811527.1,XP_811722.1,XP_811932.1,XP_812138.1,XP_812290.1,XP_812776.1,XP_813280.1,XP_813758.1,XP_813815.1,XP_814362.1,XP_814657.1,XP_816032.1,XP_816060.1,XP_817081.1,XP_817396.1,XP_817582.1,XP_…
KW-0520	NAD	10	46	4.68e-06	XP_803046.1,XP_805772.1,XP_811290.1,XP_812138.1,XP_812294.1,XP_815489.1,XP_815994.1,XP_817396.1,XP_818792.1,XP_819351.1
KW-0067	ATP-binding	34	654	2.03e-05	XP_802274.1,XP_804094.1,XP_805515.1,XP_806409.1,XP_806410.1,XP_808002.1,XP_808145.1,XP_808268.1,XP_808356.1,XP_808554.1,XP_809978.1,XP_810722.1,XP_810928.1,XP_811290.1,XP_811527.1,XP_811722.1,XP_811932.1,XP_812290.1,XP_812776.1,XP_813280.1,XP_813758.1,XP_813815.1,XP_814657.1,XP_816032.1,XP_816060.1,XP_817081.1,XP_817396.1,XP_817743.1,XP_819469.1,XP_819493.1,XP_819897.1,XP_820295.1,XP_820319.1,XP_…
KW-0175	Coiled coil	121	3971	2.03e-05	XP_802499.1,XP_802661.1,XP_802841.1,XP_803263.1,XP_804094.1,XP_804109.1,XP_804225.1,XP_804591.1,XP_804646.1,XP_804778.1,XP_804789.1,XP_804977.1,XP_805334.1,XP_805369.1,XP_805662.1,XP_806040.1,XP_806062.1,XP_806092.1,XP_806266.1,XP_806359.1,XP_806699.1,XP_806747.1,XP_806844.1,XP_806962.1,XP_807003.1,XP_807033.1,XP_807105.1,XP_807690.1,XP_807712.1,XP_807732.1,XP_807790.1,XP_808002.1,XP_808089.1,XP_…
KW-0413	Isomerase	13	116	3.09e-05	XP_807699.1,XP_808570.1,XP_810722.1,XP_810893.1,XP_811290.1,XP_812288.1,XP_812670.1,XP_813815.1,XP_815734.1,XP_817396.1,XP_820295.1,XP_821173.1,XP_821542.1
KW-0274	FAD	8	36	3.25e-05	XP_803046.1,XP_805296.1,XP_812294.1,XP_812975.1,XP_813955.1,XP_815994.1,XP_818792.1,XP_819351.1
KW-0687	Ribonucleoprotein	18	234	3.98e-05	XP_804516.1,XP_804517.1,XP_805416.1,XP_805728.1,XP_805823.1,XP_806207.1,XP_808341.1,XP_810555.1,XP_811572.1,XP_812917.1,XP_813855.1,XP_816497.1,XP_816521.1,XP_816895.1,XP_817140.1,XP_818604.1,XP_818947.1,XP_821884.1
KW-0676	Redox-active center	4	7	0.00050	XP_805296.1,XP_812294.1,XP_818792.1,XP_821173.1
KW-0963	Cytoplasm	13	167	0.00062	XP_802499.1,XP_805662.1,XP_805772.1,XP_805823.1,XP_806628.1,XP_808268.1,XP_812290.1,XP_814362.1,XP_815489.1,XP_816536.1,XP_817140.1,XP_819927.1,XP_820319.1
KW-0689	Ribosomal protein	14	197	0.00075	XP_804516.1,XP_804517.1,XP_805416.1,XP_805728.1,XP_806207.1,XP_808341.1,XP_811572.1,XP_813855.1,XP_816497.1,XP_816521.1,XP_816895.1,XP_817140.1,XP_818604.1,XP_821884.1
KW-0630	Potassium	4	10	0.0011	XP_805772.1,XP_811290.1,XP_815489.1,XP_817396.1
KW-0597	Phosphoprotein	3	4	0.0020	XP_805823.1,XP_811290.1,XP_817396.1
KW-0436	Ligase	11	148	0.0024	XP_802926.1,XP_805515.1,XP_806628.1,XP_808554.1,XP_808947.1,XP_809978.1,XP_810457.1,XP_811974.1,XP_812351.1,XP_820834.1,XP_820989.1
KW-0450	Lipoyl	3	6	0.0042	XP_810844.1,XP_815562.1,XP_819893.1
KW-0539	Nucleus	12	206	0.0090	XP_805823.1,XP_806456.1,XP_808655.1,XP_810170.1,XP_810555.1,XP_812120.1,XP_815055.1,XP_816536.1,XP_817140.1,XP_818947.1,XP_819241.1,XP_819927.1
KW-0658	Purine biosynthesis	3	9	0.0093	XP_805772.1,XP_806628.1,XP_815489.1
KW-0799	Topoisomerase	3	9	0.0093	XP_810722.1,XP_813815.1,XP_820295.1
KW-0456	Lyase	6	62	0.0125	XP_809370.1,XP_811290.1,XP_815734.1,XP_817396.1,XP_820336.1,XP_821889.1
KW-0238	DNA-binding	6	68	0.0183	XP_806456.1,XP_808911.1,XP_810170.1,XP_810722.1,XP_813815.1,XP_820295.1
KW-0012	Acyltransferase	6	75	0.0251	XP_803343.1,XP_808326.1,XP_810844.1,XP_815562.1,XP_818926.1,XP_819893.1
KW-0030	Aminoacyl-tRNA synthetase	5	51	0.0251	XP_805515.1,XP_808554.1,XP_808947.1,XP_809978.1,XP_811974.1
KW-0168	Coated pit	2	4	0.0251	XP_809778.1,XP_819466.1
KW-0575	Peroxidase	3	15	0.0251	XP_802803.1,XP_804882.1,XP_808649.1
KW-0660	Purine salvage	2	4	0.0251	XP_816536.1,XP_819927.1
KW-0968	Cytoplasmic vesicle	3	15	0.0251	XP_805662.1,XP_809778.1,XP_819466.1
KW-0809	Transit peptide	3	17	0.0275	XP_807238.1,XP_811646.1,XP_815734.1
KW-0332	GMP biosynthesis	2	5	0.0301	XP_805772.1,XP_815489.1
KW-0324	Glycolysis	3	19	0.0337	XP_809370.1,XP_811646.1,XP_812138.1
KW-0543	Viral nucleoprotein	3	20	0.0370	XP_810555.1,XP_812917.1,XP_818947.1
KW-0143	Chaperone	3	21	0.0391	XP_808268.1,XP_812290.1,XP_820319.1
KW-0378	Hydrolase	26	809	0.0489	XP_802274.1,XP_802627.1,XP_804829.1,XP_806915.1,XP_807901.1,XP_808002.1,XP_808356.1,XP_809354.1,XP_810928.1,XP_811054.1,XP_811932.1,XP_812288.1,XP_812468.1,XP_813280.1,XP_813758.1,XP_814657.1,XP_815344.1,XP_815536.1,XP_815734.1,XP_816032.1,XP_816569.1,XP_816838.1,XP_817696.1,XP_820337.1,XP_820791.1,XP_820909.1
PFAM DOMAINS
#term ID	term description	observed gene count	background gene count	false discovery rate	matching proteins in your network (IDs)
PF00198	2-oxoacid dehydrogenases acyltransferase (catalytic domain)	5	6	0.00039	XP_803343.1,XP_808326.1,XP_810844.1,XP_815562.1,XP_819893.1
PF01134	Glucose inhibited division protein A	5	7	0.00039	XP_803046.1,XP_804499.1,XP_810232.1,XP_812294.1,XP_818792.1
PF07992	Pyridine nucleotide-disulphide oxidoreductase	7	26	0.00039	XP_803046.1,XP_804499.1,XP_805296.1,XP_810232.1,XP_812197.1,XP_812294.1,XP_818792.1
PF00364	Biotin-requiring enzyme	5	9	0.00040	XP_803343.1,XP_808326.1,XP_810844.1,XP_815562.1,XP_819893.1
PF12831	FAD dependent oxidoreductase	5	11	0.00068	XP_803046.1,XP_804499.1,XP_810232.1,XP_812294.1,XP_818792.1
PF01262	Alanine dehydrogenase/PNT, C-terminal domain	4	7	0.0024	XP_803046.1,XP_804499.1,XP_813190.1,XP_816787.1
PF00162	Phosphoglycerate kinase	4	8	0.0030	XP_808145.1,XP_816060.1,XP_816061.1,XP_820901.1
PF00890	FAD binding domain	5	19	0.0037	XP_803046.1,XP_804499.1,XP_810232.1,XP_812294.1,XP_818792.1
PF12781	ATP-binding dynein motor region D5	4	9	0.0037	XP_804225.1,XP_806699.1,XP_818949.1,XP_819040.1
PF12780	P-loop containing dynein motor region D4	4	10	0.0041	XP_804225.1,XP_806699.1,XP_818949.1,XP_819040.1
PF07999	Retrotransposon hot spot protein	12	159	0.0044	XP_804778.1,XP_805334.1,XP_806266.1,XP_806677.1,XP_806905.1,XP_816848.1,XP_817540.1,XP_819561.1,XP_819566.1,XP_820130.1,XP_821157.1,XP_821160.1
PF00175	Oxidoreductase NAD-binding domain	5	24	0.0060	XP_803046.1,XP_809820.1,XP_810232.1,XP_815994.1,XP_819351.1
PF00204	DNA gyrase B	3	4	0.0060	XP_810722.1,XP_813815.1,XP_820295.1
PF00521	DNA gyrase/topoisomerase IV, subunit A	3	4	0.0060	XP_810722.1,XP_813815.1,XP_820295.1
PF02817	e3 binding domain	3	4	0.0060	XP_810844.1,XP_815562.1,XP_819893.1
PF12777	Microtubule-binding stalk of dynein motor	4	12	0.0060	XP_804225.1,XP_806699.1,XP_818949.1,XP_819040.1
PF16898	C-terminal associated domain of TOPRIM	3	4	0.0060	XP_810722.1,XP_813815.1,XP_820295.1
PF00070	Pyridine nucleotide-disulphide oxidoreductase	4	15	0.0082	XP_805296.1,XP_812197.1,XP_812294.1,XP_818792.1
PF00133	tRNA synthetases class I (I, L, M and V)	3	6	0.0100	XP_805515.1,XP_808554.1,XP_809978.1
PF09334	tRNA synthetases class I (M)	3	6	0.0100	XP_805515.1,XP_808554.1,XP_809978.1
PF03028	Dynein heavy chain and region D6 of dynein motor	4	17	0.0105	XP_804225.1,XP_806699.1,XP_818949.1,XP_819040.1
PF01751	Toprim domain	3	7	0.0121	XP_812670.1,XP_813815.1,XP_820295.1
PF07728	AAA domain (dynein-related subfamily)	6	54	0.0161	XP_806699.1,XP_807033.1,XP_818949.1,XP_819040.1,XP_819897.1,XP_822080.1
PF02737	3-hydroxyacyl-CoA dehydrogenase, NAD binding domain	3	9	0.0198	XP_813083.1,XP_815569.1,XP_819900.1
PF02852	Pyridine nucleotide-disulphide oxidoreductase, dimerisation domain	3	10	0.0243	XP_805296.1,XP_812294.1,XP_818792.1
PF00795	Carbon-nitrogen hydrolase	2	2	0.0283	XP_811054.1,XP_820791.1
PF01256	Carbohydrate kinase	2	2	0.0283	XP_811290.1,XP_817396.1
PF03853	YjeF-related protein N-terminus	2	2	0.0283	XP_811290.1,XP_817396.1
PF07350	Protein of unknown function (DUF1479)	2	2	0.0283	XP_808890.1,XP_819122.1
PF00271	Helicase conserved C-terminal domain	8	114	0.0311	XP_802274.1,XP_808002.1,XP_811932.1,XP_813280.1,XP_813758.1,XP_816032.1,XP_821125.1,XP_822094.1
PF01266	FAD dependent oxidoreductase	3	12	0.0311	XP_803046.1,XP_804499.1,XP_810232.1
PF00107	Zinc-binding dehydrogenase	3	13	0.0357	XP_811475.1,XP_813190.1,XP_816787.1
PF01150	GDA1/CD39 (nucleoside phosphatase) family	2	3	0.0357	XP_802627.1,XP_809354.1
PF02424	ApbE family	2	3	0.0357	XP_803046.1,XP_804499.1
PF02518	Histidine kinase-, DNA gyrase B-, and HSP90-like ATPase	3	13	0.0357	XP_810722.1,XP_813815.1,XP_820295.1
PF07719	Tetratricopeptide repeat	4	30	0.0357	XP_802661.1,XP_809790.1,XP_811023.1,XP_821542.1
PF08240	Alcohol dehydrogenase GroES-like domain	3	13	0.0357	XP_811475.1,XP_813190.1,XP_816787.1
PF08393	Dynein heavy chain, N-terminal region 2	3	14	0.0357	XP_806699.1,XP_818949.1,XP_819040.1
PF12775	P-loop containing dynein motor region D3	3	13	0.0357	XP_806699.1,XP_818949.1,XP_819040.1
PF12848	ABC transporter	2	3	0.0357	XP_812776.1,XP_817081.1
PF12774	Hydrolytic ATP binding site of dynein motor region D1	3	15	0.0394	XP_806699.1,XP_818949.1,XP_819040.1
PF00185	Aspartate/ornithine carbamoyltransferase, Asp/Orn binding domain	2	4	0.0427	XP_812791.1,XP_813605.1
PF00970	Oxidoreductase FAD-binding domain	3	16	0.0427	XP_803046.1,XP_815994.1,XP_819351.1
PF02729	Aspartate/ornithine carbamoyltransferase, carbamoyl-P binding domain	2	4	0.0427	XP_812791.1,XP_813605.1
PF08264	Anticodon-binding domain of tRNA	2	4	0.0427	XP_805515.1,XP_808554.1
PF08543	Phosphomethylpyrimidine kinase	2	4	0.0427	XP_810899.1,XP_811290.1
PF13450	NAD(P)-binding Rossmann-like domain	3	17	0.0466	XP_803046.1,XP_804499.1,XP_810232.1
INTERPRO PROTEIN DOMAINS AND FEATURES
#term ID	term description	observed gene count	background gene count	false discovery rate	matching proteins in your network (IDs)
IPR027417	P-loop containing nucleoside triphosphate hydrolase	41	811	7.94e-05	XP_802274.1,XP_804094.1,XP_804225.1,XP_804534.1,XP_805569.1,XP_806410.1,XP_806583.1,XP_806628.1,XP_806699.1,XP_806915.1,XP_807033.1,XP_807614.1,XP_808002.1,XP_808356.1,XP_808655.1,XP_808928.1,XP_809544.1,XP_811527.1,XP_811932.1,XP_812350.1,XP_812776.1,XP_813280.1,XP_813758.1,XP_814657.1,XP_815055.1,XP_815360.1,XP_816032.1,XP_817081.1,XP_817366.1,XP_817582.1,XP_817794.1,XP_818949.1,XP_819040.1,XP_…
IPR001078	2-oxoacid dehydrogenase acyltransferase, catalytic domain	5	6	0.00038	XP_803343.1,XP_808326.1,XP_810844.1,XP_815562.1,XP_819893.1
IPR023213	Chloramphenicol acetyltransferase-like domain superfamily	5	6	0.00038	XP_803343.1,XP_808326.1,XP_810844.1,XP_815562.1,XP_819893.1
IPR000089	Biotin/lipoyl attachment	5	11	0.0016	XP_803343.1,XP_808326.1,XP_810844.1,XP_815562.1,XP_819893.1
IPR011053	Single hybrid motif	5	12	0.0018	XP_803343.1,XP_808326.1,XP_810844.1,XP_815562.1,XP_819893.1
IPR015824	Phosphoglycerate kinase, N-terminal	4	6	0.0029	XP_808145.1,XP_816060.1,XP_816061.1,XP_820901.1
IPR001576	Phosphoglycerate kinase	4	7	0.0039	XP_808145.1,XP_816060.1,XP_816061.1,XP_820901.1
IPR036043	Phosphoglycerate kinase superfamily	4	7	0.0039	XP_808145.1,XP_816060.1,XP_816061.1,XP_820901.1
IPR006171	TOPRIM domain	4	9	0.0064	XP_810722.1,XP_812670.1,XP_813815.1,XP_820295.1
IPR035706	Dynein heavy chain, ATP-binding dynein motor region	4	9	0.0064	XP_804225.1,XP_806699.1,XP_818949.1,XP_819040.1
IPR024317	Dynein heavy chain, AAA module D4	4	10	0.0072	XP_804225.1,XP_806699.1,XP_818949.1,XP_819040.1
IPR001433	Oxidoreductase FAD/NAD(P)-binding	5	23	0.0101	XP_803046.1,XP_809820.1,XP_810232.1,XP_815994.1,XP_819351.1
IPR001154	DNA topoisomerase II, eukaryotic-type	3	4	0.0104	XP_810722.1,XP_813815.1,XP_820295.1
IPR001241	DNA topoisomerase, type IIA	3	4	0.0104	XP_810722.1,XP_813815.1,XP_820295.1
IPR002205	DNA topoisomerase, type IIA, subunit A/C-terminal	3	4	0.0104	XP_810722.1,XP_813815.1,XP_820295.1
IPR004167	Peripheral subunit-binding domain	3	4	0.0104	XP_810844.1,XP_815562.1,XP_819893.1
IPR006518	Trypanosome RHS	12	177	0.0104	XP_804778.1,XP_805334.1,XP_806266.1,XP_806677.1,XP_806905.1,XP_816848.1,XP_817540.1,XP_819561.1,XP_819566.1,XP_820130.1,XP_821157.1,XP_821160.1
IPR012999	Pyridine nucleotide-disulphide oxidoreductase, class I, active site	3	4	0.0104	XP_805296.1,XP_812294.1,XP_818792.1
IPR013506	DNA topoisomerase, type IIA, subunit B, domain 2	3	4	0.0104	XP_810722.1,XP_813815.1,XP_820295.1
IPR013759	DNA topoisomerase, type IIA, subunit B, C-terminal	3	4	0.0104	XP_810722.1,XP_813815.1,XP_820295.1
IPR013760	DNA topoisomerase, type IIA-like domain superfamily	3	4	0.0104	XP_810722.1,XP_813815.1,XP_820295.1
IPR015911	Phosphoglycerate kinase, conserved site	3	5	0.0104	XP_808145.1,XP_816060.1,XP_816061.1
IPR017938	Riboflavin synthase-like beta-barrel	5	24	0.0104	XP_803046.1,XP_809820.1,XP_810232.1,XP_815994.1,XP_819351.1
IPR018522	DNA topoisomerase, type IIA, conserved site	3	4	0.0104	XP_810722.1,XP_813815.1,XP_820295.1
IPR024743	Dynein heavy chain, coiled coil stalk	4	12	0.0104	XP_804225.1,XP_806699.1,XP_818949.1,XP_819040.1
IPR031660	C-terminal associated domain of TOPRIM	3	4	0.0104	XP_810722.1,XP_813815.1,XP_820295.1
IPR036188	FAD/NAD(P)-binding domain superfamily	7	59	0.0104	XP_803046.1,XP_804499.1,XP_805296.1,XP_810232.1,XP_812197.1,XP_812294.1,XP_818792.1
IPR036291	NAD(P)-binding domain superfamily	11	141	0.0104	XP_805653.1,XP_807540.1,XP_811475.1,XP_812138.1,XP_813083.1,XP_813190.1,XP_815569.1,XP_816787.1,XP_819302.1,XP_819900.1,XP_820834.1
IPR036625	E3-binding domain superfamily	3	4	0.0104	XP_810844.1,XP_815562.1,XP_819893.1
IPR039261	Ferredoxin-NADP reductase (FNR), nucleotide-binding domain	5	29	0.0104	XP_803046.1,XP_809820.1,XP_810232.1,XP_815994.1,XP_819351.1
IPR004273	Dynein heavy chain region D6 P-loop domain	4	16	0.0113	XP_804225.1,XP_806699.1,XP_818949.1,XP_819040.1
IPR010920	LSM domain superfamily	5	31	0.0128	XP_808086.1,XP_810555.1,XP_812917.1,XP_818947.1,XP_820557.1
IPR003953	FAD-dependent oxidoreductase 2, FAD binding domain	3	7	0.0156	XP_803046.1,XP_804499.1,XP_810232.1
IPR001100	Pyridine nucleotide-disulphide oxidoreductase, class I	3	8	0.0205	XP_805296.1,XP_812294.1,XP_818792.1
IPR009080	Aminoacyl-tRNA synthetase, class Ia, anticodon-binding	3	8	0.0205	XP_805515.1,XP_808554.1,XP_809978.1
IPR013149	Alcohol dehydrogenase, C-terminal	3	8	0.0205	XP_811475.1,XP_813190.1,XP_816787.1
IPR016040	NAD(P)-binding domain	7	76	0.0210	XP_805653.1,XP_807540.1,XP_813083.1,XP_815569.1,XP_819302.1,XP_819900.1,XP_820834.1
IPR017927	FAD-binding domain, ferredoxin reductase-type	4	21	0.0222	XP_803046.1,XP_809820.1,XP_815994.1,XP_819351.1
IPR020843	Polyketide synthase, enoylreductase domain	3	9	0.0234	XP_811475.1,XP_813190.1,XP_816787.1
IPR029056	Ribokinase-like	3	9	0.0234	XP_810899.1,XP_811290.1,XP_817396.1
IPR004099	Pyridine nucleotide-disulphide oxidoreductase, dimerisation domain	3	10	0.0286	XP_805296.1,XP_812294.1,XP_818792.1
IPR016156	FAD/NAD-linked reductase, dimerisation domain superfamily	3	10	0.0286	XP_805296.1,XP_812294.1,XP_818792.1
IPR000407	Nucleoside phosphatase GDA1/CD39	2	3	0.0329	XP_802627.1,XP_809354.1
IPR000530	Ribosomal protein S12e	2	3	0.0329	XP_813855.1,XP_818604.1
IPR000631	ATP-dependent (S)-NAD(P)H-hydrate dehydratase	2	2	0.0329	XP_811290.1,XP_817396.1
IPR001650	Helicase, C-terminal	8	115	0.0329	XP_802274.1,XP_808002.1,XP_811932.1,XP_813280.1,XP_813758.1,XP_816032.1,XP_821125.1,XP_822094.1
IPR001709	Flavoprotein pyridine nucleotide cytochrome reductase	3	12	0.0329	XP_809820.1,XP_815994.1,XP_819351.1
IPR001834	NADH:cytochrome b5 reductase-like	3	12	0.0329	XP_803046.1,XP_815994.1,XP_819351.1
IPR002143	Ribosomal protein L1	2	2	0.0329	XP_811572.1,XP_821884.1
IPR002194	Chaperonin TCP-1, conserved site	3	12	0.0329	XP_808268.1,XP_812290.1,XP_820319.1
IPR002207	Class I peroxidase	2	2	0.0329	XP_804882.1,XP_808649.1
IPR002300	Aminoacyl-tRNA synthetase, class Ia	2	3	0.0329	XP_805515.1,XP_808554.1
IPR002328	Alcohol dehydrogenase, zinc-type, conserved site	2	2	0.0329	XP_813190.1,XP_816787.1
IPR003010	Carbon-nitrogen hydrolase	2	2	0.0329	XP_811054.1,XP_820791.1
IPR003213	Cytochrome c oxidase, subunit VIb	2	2	0.0329	XP_808220.1,XP_811506.1
IPR003374	ApbE-like superfamily	2	3	0.0329	XP_803046.1,XP_804499.1
IPR004443	YjeF N-terminal domain	2	2	0.0329	XP_811290.1,XP_817396.1
IPR006255	Dihydrolipoamide succinyltransferase	2	2	0.0329	XP_803343.1,XP_808326.1
IPR006257	Dihydrolipoyllysine-residue acetyltransferase component of pyruvate dehydrogenase complex	2	2	0.0329	XP_815562.1,XP_819893.1
IPR006258	Dihydrolipoamide dehydrogenase	2	2	0.0329	XP_812294.1,XP_818792.1
IPR009008	Valyl/Leucyl/Isoleucyl-tRNA synthetase, editing domain	2	3	0.0329	XP_805515.1,XP_808554.1
IPR010044	Methylthioadenosine phosphorylase (MTAP)	2	2	0.0329	XP_816536.1,XP_819927.1
IPR010856	Protein of unknown function DUF1479	2	2	0.0329	XP_808890.1,XP_819122.1
IPR010960	Flavocytochrome c	2	3	0.0329	XP_803046.1,XP_810232.1
IPR011704	ATPase, dynein-related, AAA domain	3	11	0.0329	XP_806699.1,XP_807033.1,XP_818949.1
IPR013000	Ribosomal protein L4/L1e, eukaryotic/archaeal, conserved site	2	3	0.0329	XP_804516.1,XP_804517.1
IPR013154	Alcohol dehydrogenase, N-terminal	3	11	0.0329	XP_811475.1,XP_813190.1,XP_816787.1
IPR013328	6-phosphogluconate dehydrogenase, domain 2	3	11	0.0329	XP_813083.1,XP_815569.1,XP_819900.1
IPR013602	Dynein heavy chain, domain-2	3	14	0.0329	XP_806699.1,XP_818949.1,XP_819040.1
IPR013757	Type IIA DNA topoisomerase subunit A, alpha-helical domain superfamily	2	2	0.0329	XP_813815.1,XP_820295.1
IPR013758	DNA topoisomerase, type IIA, subunit A/ C-terminal, alpha-beta	2	2	0.0329	XP_813815.1,XP_820295.1
IPR016095	Ribosomal protein L1, 3-layer alpha/beta-sandwich	2	2	0.0329	XP_811572.1,XP_821884.1
IPR017871	ABC transporter, conserved site	4	30	0.0329	XP_806410.1,XP_811527.1,XP_812776.1,XP_817081.1
IPR017953	Carbohydrate kinase, predicted, conserved site	2	2	0.0329	XP_811290.1,XP_817396.1
IPR017998	Chaperone tailless complex polypeptide 1 (TCP-1)	3	12	0.0329	XP_808268.1,XP_812290.1,XP_820319.1
IPR018099	Purine phosphorylase, family 2, conserved site	2	2	0.0329	XP_816536.1,XP_819927.1
IPR019794	Peroxidase, active site	2	2	0.0329	XP_804882.1,XP_808649.1
IPR022694	3-hydroxyacyl-CoA dehydrogenase	2	2	0.0329	XP_815569.1,XP_819900.1
IPR023673	Ribosomal protein L1, conserved site	2	2	0.0329	XP_811572.1,XP_821884.1
IPR023753	FAD/NAD(P)-binding domain	4	27	0.0329	XP_805296.1,XP_812197.1,XP_812294.1,XP_818792.1
IPR024932	Flavin transferase ApbE	2	3	0.0329	XP_803046.1,XP_804499.1
IPR027250	Phosphoglycerate kinase, euglenozoa	2	2	0.0329	XP_808145.1,XP_816060.1
IPR032781	ABC-transporter extension domain	2	3	0.0329	XP_812776.1,XP_817081.1
IPR033173	Translational activator Gcn1	2	3	0.0329	XP_804646.1,XP_819271.1
IPR035309	Proteasome activator complex subunit 4	2	3	0.0329	XP_813961.1,XP_816281.1
IPR035699	Dynein heavy chain, hydrolytic ATP-binding dynein motor region	3	14	0.0329	XP_806699.1,XP_818949.1,XP_819040.1
IPR036526	Carbon-nitrogen hydrolase superfamily	2	2	0.0329	XP_811054.1,XP_820791.1
IPR036549	Cytochrome c oxidase, subunit VIb superfamily	2	2	0.0329	XP_808220.1,XP_811506.1
IPR036652	YjeF N-terminal domain superfamily	2	2	0.0329	XP_811290.1,XP_817396.1
IPR008333	Flavoprotein pyridine nucleotide cytochrome reductase-like, FAD-binding domain	3	15	0.0345	XP_803046.1,XP_815994.1,XP_819351.1
IPR011032	GroES-like superfamily	3	15	0.0345	XP_811475.1,XP_813190.1,XP_816787.1
IPR000163	Prohibitin	2	4	0.0375	XP_810690.1,XP_812089.1
IPR001128	Cytochrome P450	2	4	0.0375	XP_810346.1,XP_818982.1
IPR002082	Aspartate carbamoyltransferase	2	4	0.0375	XP_812791.1,XP_813605.1
IPR005990	Inosine-5'-monophosphate dehydrogenase	2	4	0.0375	XP_805772.1,XP_815489.1
IPR006130	Aspartate/ornithine carbamoyltransferase	2	4	0.0375	XP_812791.1,XP_813605.1
IPR006131	Aspartate/ornithine carbamoyltransferase, Asp/Orn-binding domain	2	4	0.0375	XP_812791.1,XP_813605.1
IPR006132	Aspartate/ornithine carbamoyltransferase, carbamoyl-P binding	2	4	0.0375	XP_812791.1,XP_813605.1
IPR013155	Methionyl/Valyl/Leucyl/Isoleucyl-tRNA synthetase, anticodon-binding	2	4	0.0375	XP_805515.1,XP_808554.1
IPR015875	IMP dehydrogenase / GMP reductase, conserved site	2	4	0.0375	XP_805772.1,XP_815489.1
IPR017937	Thioredoxin, conserved site	3	16	0.0375	XP_807699.1,XP_820241.1,XP_821173.1
IPR036901	Aspartate/ornithine carbamoyltransferase superfamily	2	4	0.0375	XP_812791.1,XP_813605.1
IPR003594	Histidine kinase/HSP90-like ATPase	3	17	0.0409	XP_810722.1,XP_813815.1,XP_820295.1
IPR014722	Ribosomal protein L2, domain 2	3	17	0.0409	XP_816497.1,XP_816895.1,XP_821556.1
IPR003593	AAA+ ATPase domain	9	163	0.0425	XP_806410.1,XP_806699.1,XP_811527.1,XP_812776.1,XP_814657.1,XP_817081.1,XP_818949.1,XP_819897.1,XP_822080.1
IPR000845	Nucleoside phosphorylase domain	2	5	0.0450	XP_816536.1,XP_819927.1
IPR001093	IMP dehydrogenase/GMP reductase	2	5	0.0450	XP_805772.1,XP_815489.1
IPR002016	Haem peroxidase	2	5	0.0450	XP_804882.1,XP_808649.1
IPR002136	Ribosomal protein L4/L1e	2	5	0.0450	XP_804516.1,XP_804517.1
IPR005788	Disulphide isomerase	2	5	0.0450	XP_807699.1,XP_821173.1
IPR009071	High mobility group box domain	2	5	0.0450	XP_808911.1,XP_810170.1
IPR010255	Haem peroxidase superfamily	2	5	0.0450	XP_804882.1,XP_808649.1
IPR023574	Ribosomal protein L4 domain superfamily	2	5	0.0450	XP_804516.1,XP_804517.1
IPR026983	Dynein heavy chain	4	37	0.0450	XP_804225.1,XP_806699.1,XP_818949.1,XP_819040.1
IPR027141	Like-Sm (LSM) domain containing protein, LSm4/SmD1/SmD3	2	5	0.0450	XP_812917.1,XP_818947.1
IPR027409	GroEL-like apical domain superfamily	3	18	0.0450	XP_808268.1,XP_812290.1,XP_820319.1
IPR027477	Succinate dehydrogenase/fumarate reductase flavoprotein, catalytic domain superfamily	2	5	0.0450	XP_803046.1,XP_810232.1
IPR035994	Nucleoside phosphorylase superfamily	2	5	0.0450	XP_816536.1,XP_819927.1
IPR036890	Histidine kinase/HSP90-like ATPase superfamily	3	18	0.0450	XP_810722.1,XP_813815.1,XP_820295.1
IPR027410	TCP-1-like chaperonin intermediate domain superfamily	3	19	0.0461	XP_808268.1,XP_812290.1,XP_820319.1
SMART PROTEIN DOMAINS
#term ID	term description	observed gene count	background	false discovery rate	matching proteins in your network (labels)
SM00433	TopoisomeraseII	3	4	0.0167	XP_810722.1,XP_813815.1,XP_820295.1
SM00434	DNA Topoisomerase IV	3	4	0.0167	XP_810722.1,XP_813815.1,XP_820295.1
